# Supplementary material for: Utilization of Transcriptome, Small RNA, and Degradome Sequencing to Provide Insights Into Drought Stress and Rewatering Treatment in Medicago ruthenica
Source: Front Plant Sci. 2021 Aug 3;12:675903. doi: 10.3389/fpls.2021.675903 (PMC8369265; doi:10.3389/fpls.2021.675903)
Supplement: Supplementary file 1 [file Table_1.XLSX]

## Sheet: Sheet1
Sample	Raw_Reads	Raw_Bases	Valid_Reads	Valid_Bases	Valid%	Q20%	Q30%	GC%
CK_1	55818774	8.37G	55446272	7.76G	99.33	98.52	95.02	43.17
CK_2	50922392	7.64G	50540160	7.07G	99.25	98.47	94.92	43.02
CK_3	36207356	5.43G	35965862	5.04G	99.33	98.5	94.95	43.01
DS_1	37784008	5.67G	37475848	5.24G	99.18	98.42	94.86	43.3
DS_2	47359212	7.10G	46993218	6.57G	99.23	98.45	94.88	42.84
DS_3	38997902	5.85G	38727804	5.42G	99.31	98.54	95.1	43.4
RW_1	54074720	8.11G	53674458	7.52G	99.26	98.51	94.97	43.15
RW_2	47782628	7.17G	47448784	6.65G	99.3	98.53	95	43.09
RW_3	40008942	6.00G	39687026	5.54G	99.2	98.41	94.89	43.54
