# Supplementary material for: Utilization of Transcriptome, Small RNA, and Degradome Sequencing to Provide Insights Into Drought Stress and Rewatering Treatment in Medicago ruthenica
Source: Front Plant Sci. 2021 Aug 3;12:675903. doi: 10.3389/fpls.2021.675903 (PMC8369265; doi:10.3389/fpls.2021.675903)
Supplement: Supplementary file 2 [file Table_2.XLSX]

## Sheet: DS vs. CK
Gene_ID	Length	Trans_ID	Annotation	Name	swissprot_description	GO_Term	NOG	KOEntry	KODescription	EC	KEGG_Pathway	Pfam_description	DS_mean_TPM	CK_mean_TPM	log2FC	regulation	pvalue	FDR	significant
TRINITY_DN16242_c0_g1	1118	TRINITY_DN16242_c0_g1_i1;TRINITY_DN16242_c0_g1_i2;TRINITY_DN16242_c0_g1_i3;TRINITY_DN16242_c0_g1_i4;TRINITY_DN16242_c0_g1_i5;TRINITY_DN16242_c0_g1_i6	ethylene-responsive transcription factor ERF109 [Medicago truncatula]	ERF109	Ethylene-responsive transcription factor ERF109 OS=Arabidopsis thaliana GN=ERF109 PE=1 SV=1	GO:0003677(DNA binding);GO:0003700(DNA binding transcription factor activity);GO:0005634(nucleus);GO:0006351(transcription, DNA-templated);GO:0006355(regulation of transcription, DNA-templated);GO:0009873(ethylene-activated signaling pathway);GO:0010087(phloem or xylem histogenesis);GO:0010200(response to chitin);GO:0050832(defense response to fungus);GO:0051301(cell division)	ENOG410YN6X(transcription factor)	NA	NA	NA	NA(NA)	A0A072UMM6.1 PF00847.18;AP2;	564.15	0.05	13.2255	up	9.03857e-93	2.50875e-88	yes
TRINITY_DN17085_c1_g4	1980	TRINITY_DN17085_c1_g4_i1;TRINITY_DN17085_c1_g4_i2;TRINITY_DN17085_c1_g4_i3	protein ALP1-like [Medicago truncatula]	-	-	GO:0005634(nucleus);GO:0005774(vacuolar membrane);GO:0005886(plasma membrane);GO:0009507(chloroplast);GO:0016020(membrane)	ENOG411206Y(transposon protein)	NA	NA	NA	NA(NA)	M5VPE7.1 PF13359.4;DDE_Tnp_4;	586.97	0.98	9.45465	up	1.75714e-73	2.43856e-69	yes
TRINITY_DN13498_c0_g1	1342	TRINITY_DN13498_c0_g1_i1;TRINITY_DN13498_c0_g1_i2	ethylene-responsive transcription factor ERF017 [Medicago truncatula]	ERF017	Ethylene-responsive transcription factor ERF017 OS=Arabidopsis thaliana GN=ERF017 PE=2 SV=1	GO:0003677(DNA binding);GO:0003700(DNA binding transcription factor activity);GO:0005634(nucleus);GO:0006351(transcription, DNA-templated);GO:0006355(regulation of transcription, DNA-templated);GO:0009873(ethylene-activated signaling pathway)	ENOG410YZF0(AP2)	NA	NA	NA	NA(NA)	G7IIR3.1 PF00847.18;AP2;	184.61	0.07	11.4798	up	2.24224e-66	2.07452e-62	yes
TRINITY_DN12573_c0_g1	1615	TRINITY_DN12573_c0_g1_i1	putative cytochrome P450 [Medicago truncatula]	CYP94C1	Cytochrome P450 94C1 OS=Arabidopsis thaliana GN=CYP94C1 PE=2 SV=1	GO:0005506(iron ion binding);GO:0005576(extracellular region);GO:0005789(endoplasmic reticulum membrane);GO:0009611(response to wounding);GO:0016021(integral component of membrane);GO:0018685(alkane 1-monooxygenase activity);GO:0019825(oxygen binding);GO:0020037(heme binding);GO:0043231(intracellular membrane-bounded organelle);GO:0055114(oxidation-reduction process)	COG2124(Cytochrome p450)	NA	NA	NA	NA(NA)	Q2MJ03.1 PF00067.20;p450;	60.61	0.05	10.4986	up	8.73635e-62	6.06215e-58	yes
TRINITY_DN13880_c0_g2	1321	TRINITY_DN13880_c0_g2_i1	UPF0496 protein 4 [Medicago truncatula]	-	-	-	ENOG4111ACI(NA)	-	-	-	-	B9HNU3.2 PF03087.12;DUF241;	316.78	0.2	10.7465	up	1.32543e-61	7.35774e-58	yes
TRINITY_DN19559_c0_g4	891	TRINITY_DN19559_c0_g4_i1	hypothetical protein TSUD_195950 [Trifolium subterraneum]	-	-	GO:0003674(molecular_function);GO:0005634(nucleus);GO:0008150(biological_process)	ENOG4111CVP(NA)	-	-	-	-	-	136.02	0.55	8.13705	up	6.25244e-56	2.89238e-52	yes
TRINITY_DN18346_c0_g4	811	TRINITY_DN18346_c0_g4_i1;TRINITY_DN18346_c0_g4_i2;TRINITY_DN18346_c0_g4_i3	uncharacterized protein LOC11435286 [Medicago truncatula]	-	-	-	ENOG410YVPM(NA)	-	-	-	-	G7KSS6.2 PF14009.4;DUF4228;	232.13	1.11	7.71705	up	2.61143e-52	1.03547e-48	yes
TRINITY_DN23805_c0_g4	1584	TRINITY_DN23805_c0_g4_i1;TRINITY_DN23805_c0_g4_i2;TRINITY_DN23805_c0_g4_i3	putative transferase [Medicago truncatula]	3AT1	Coumaroyl-CoA:anthocyanidin 3-O-glucoside-6''-O-coumaroyltransferase 1 OS=Arabidopsis thaliana GN=3AT1 PE=1 SV=1	GO:0005737(cytoplasm);GO:0016740(transferase activity);GO:0016747(transferase activity, transferring acyl groups other than amino-acyl groups)	ENOG410ZBAM(Anthocyanin 5-aromatic)	K13264	isoflavone 7-O-glucoside-6''-O-malonyltransferase	EC:2.3.1.115	gmx00944(Flavone and flavonol biosynthesis);gmx00943(Isoflavonoid biosynthesis)	A0A072TX26.1 PF02458.13;Transferase;	0.59	42.04	-8.53943	down	8.61409e-49	2.98866e-45	yes
TRINITY_DN17430_c0_g3	1042	TRINITY_DN17430_c0_g3_i1;TRINITY_DN17430_c0_g3_i2;TRINITY_DN17430_c0_g3_i3	B-cell receptor-associated protein 31 [Medicago truncatula]	-	-	GO:0003674(molecular_function);GO:0005737(cytoplasm);GO:0005783(endoplasmic reticulum);GO:0006886(intracellular protein transport);GO:0016021(integral component of membrane)	COG5374(b-cell receptor-associated protein)	K14009	B-cell receptor-associated protein 31	-	mtr04141(Protein processing in endoplasmic reticulum)	A2Q4H3.1 PF05529.10;Bap31;	102.91	0.48	7.88496	up	8.33915e-48	2.57179e-44	yes
TRINITY_DN18666_c0_g2	928	TRINITY_DN18666_c0_g2_i1;TRINITY_DN18666_c0_g2_i2;TRINITY_DN18666_c0_g2_i3;TRINITY_DN18666_c0_g2_i4	nudix hydrolase 18, mitochondrial [Medicago truncatula]	NUDT18	Nudix hydrolase 18, mitochondrial OS=Arabidopsis thaliana GN=NUDT18 PE=2 SV=1	GO:0005634(nucleus);GO:0005737(cytoplasm);GO:0005739(mitochondrion);GO:0016787(hydrolase activity);GO:0016818(hydrolase activity, acting on acid anhydrides, in phosphorus-containing anhydrides);GO:0046872(metal ion binding)	COG0494(Nudix hydrolase)	NA	NA	NA	NA(NA)	G7LAJ8.1 PF00293.26;NUDIX;	436.32	2.66	7.48503	up	7.7966e-47	2.16403e-43	yes
TRINITY_DN14204_c0_g1	483	TRINITY_DN14204_c0_g1_i1	cysteine-rich TM module stress tolerance protein [Medicago truncatula]	-	-	-	-	-	-	-	-	G7IH44.1 PF12734.5;CYSTM;	493.25	4.17	7.06543	up	6.90927e-45	1.7434e-41	yes
TRINITY_DN12846_c0_g1	1348	TRINITY_DN12846_c0_g1_i1;TRINITY_DN12846_c0_g1_i2	unknown [Medicago truncatula]	-	-	GO:0003674(molecular_function);GO:0005575(cellular_component);GO:0009061(anaerobic respiration)	ENOG410YUY6(NA)	-	-	-	-	-	79.49	1.99	5.49743	up	7.67045e-44	1.77418e-40	yes
TRINITY_DN19452_c0_g5	927	TRINITY_DN19452_c0_g5_i1	-	-	-	-	-	-	-	-	-	-	61.01	0.67	6.68289	up	1.543e-42	3.29442e-39	yes
TRINITY_DN16733_c0_g3	1399	TRINITY_DN16733_c0_g3_i1;TRINITY_DN16733_c0_g3_i2	serine/threonine-protein kinase OXI1 [Medicago truncatula]	OXI1	Serine/threonine-protein kinase OXI1 OS=Arabidopsis thaliana GN=OXI1 PE=1 SV=1	GO:0004674(protein serine/threonine kinase activity);GO:0005634(nucleus);GO:0005737(cytoplasm);GO:0005886(plasma membrane);GO:0035556(intracellular signal transduction)	ENOG410XQ0C(serine threonine-protein kinase)	K20714	serine/threonine-protein kinase OXI1	EC:2.7.11.1	mtr04016(MAPK signaling pathway - plant)	A0A072U073.1 PF00069.23;Pkinase;	56.21	0.9	6.11556	up	1.68881e-41	3.34819e-38	yes
TRINITY_DN13002_c0_g1	849	TRINITY_DN13002_c0_g1_i1;TRINITY_DN13002_c0_g1_i2;TRINITY_DN13002_c0_g1_i3;TRINITY_DN13002_c0_g1_i4	dehydration-responsive element-binding protein 1E [Medicago truncatula]	DREB1E	Dehydration-responsive element-binding protein 1E OS=Arabidopsis thaliana GN=DREB1E PE=2 SV=1	GO:0003677(DNA binding);GO:0003700(DNA binding transcription factor activity);GO:0005634(nucleus);GO:0006351(transcription, DNA-templated);GO:0006355(regulation of transcription, DNA-templated);GO:0010371(regulation of gibberellin biosynthetic process);GO:0048510(regulation of timing of transition from vegetative to reproductive phase)	ENOG41108HV(dwarf and delayed flowering 1)	NA	NA	NA	NA(NA)	G7KDH8.1 PF00847.18;AP2;	110.15	0.08	10.8084	up	2.05938e-41	3.81067e-38	yes
TRINITY_DN14389_c0_g4	1588	TRINITY_DN14389_c0_g4_i1	ethylene-responsive transcription factor ERF026 [Medicago truncatula]	ERF026	Ethylene-responsive transcription factor ERF026 OS=Arabidopsis thaliana GN=ERF026 PE=2 SV=1	GO:0003677(DNA binding);GO:0003700(DNA binding transcription factor activity);GO:0005634(nucleus);GO:0006351(transcription, DNA-templated);GO:0006355(regulation of transcription, DNA-templated);GO:0009873(ethylene-activated signaling pathway);GO:0019760(glucosinolate metabolic process);GO:0043565(sequence-specific DNA binding);GO:0044212(transcription regulatory region DNA binding);GO:0045893(pos…	ENOG410YMJJ(Transcription factor)	NA	NA	NA	NA(NA)	V7CBX9.1 PF00847.18;AP2;	62.85	1.54	5.53731	up	1.81937e-40	3.15615e-37	yes
TRINITY_DN15550_c0_g1	913	TRINITY_DN15550_c0_g1_i1;TRINITY_DN15550_c0_g1_i2;TRINITY_DN15550_c0_g1_i3;TRINITY_DN15550_c0_g1_i4	protein LURP-one-related 8 [Medicago truncatula]	At5g41590	Protein LURP-one-related 17 OS=Arabidopsis thaliana GN=At5g41590 PE=2 SV=2	GO:0006952(defense response)	ENOG4111AYF(LURP-one-related 17-like)	-	-	-	-	A0A072TVE4.1 PF04525.10;LOR;	492.53	8.75	5.97185	up	3.90909e-40	6.3824e-37	yes
TRINITY_DN15238_c0_g1	1632	TRINITY_DN15238_c0_g1_i1;TRINITY_DN15238_c0_g1_i2;TRINITY_DN15238_c0_g1_i3	U-box domain-containing protein 21 [Medicago truncatula]	PUB21	U-box domain-containing protein 21 OS=Arabidopsis thaliana GN=PUB21 PE=2 SV=1	GO:0004842(ubiquitin-protein transferase activity);GO:0005634(nucleus);GO:0010200(response to chitin);GO:0016567(protein ubiquitination)	ENOG410Y3P9(Ubox domain-containing protein)	NA	NA	NA	NA(NA)	G7J8Q8.1 PF04564.13;U-box;	457.04	5.65	6.50222	up	5.73036e-40	8.68291e-37	yes
TRINITY_DN12749_c0_g1	334	TRINITY_DN12749_c0_g1_i1;TRINITY_DN12749_c0_g1_i2;TRINITY_DN12749_c0_g1_i3;TRINITY_DN12749_c0_g1_i4;TRINITY_DN12749_c0_g1_i5	putative arabinogalactan peptide, AGP [Medicago truncatula]	AGP16	Arabinogalactan peptide 16 OS=Arabidopsis thaliana GN=AGP16 PE=1 SV=1	GO:0003674(molecular_function);GO:0005886(plasma membrane);GO:0008150(biological_process);GO:0016021(integral component of membrane)	ENOG4111AK3(agp22, atagp22 agp22 (arabinogalactan protein 22))	-	-	-	-	G7KNJ1.1 PF06376.10;AGP;	394.27	12.09	5.24758	up	5.94377e-40	8.68291e-37	yes
TRINITY_DN16290_c2_g1	3695	TRINITY_DN16290_c2_g1_i1;TRINITY_DN16290_c2_g1_i2;TRINITY_DN16290_c2_g1_i3;TRINITY_DN16290_c2_g1_i4;TRINITY_DN16290_c2_g1_i5	protein LYK5 [Medicago truncatula]	LYK5	Protein LYK5 OS=Arabidopsis thaliana GN=LYK5 PE=2 SV=1	GO:0004675(transmembrane receptor protein serine/threonine kinase activity);GO:0005515(protein binding);GO:0005524(ATP binding);GO:0005576(extracellular region);GO:0005886(plasma membrane);GO:0006468(protein phosphorylation);GO:0007166(cell surface receptor signaling pathway);GO:0008061(chitin binding);GO:0016021(integral component of membrane);GO:0016301(kinase activity);GO:0042803(protein homod…	COG0515(Serine Threonine protein kinase)	NA	NA	NA	NA(NA)	G7K7K0.2 PF00069.23;Pkinase;	218.61	6.76	5.05208	up	8.14486e-39	1.13034e-35	yes
TRINITY_DN15784_c2_g2	723	TRINITY_DN15784_c2_g2_i1;TRINITY_DN15784_c2_g2_i2;TRINITY_DN15784_c2_g2_i3;TRINITY_DN15784_c2_g2_i4	hypothetical protein VIGAN_01005700 [Vigna angularis var. angularis]	CML26	Probable calcium-binding protein CML26 OS=Arabidopsis thaliana GN=CML26 PE=1 SV=1	GO:0005509(calcium ion binding)	COG5126(Calcium-binding protein)	K13448	calcium-binding protein CML	-	mtr04626(Plant-pathogen interaction)	G7LDC5.1 PF13499.4;EF-hand_7;	800.6	33.78	4.74928	up	7.00148e-38	9.25395e-35	yes
TRINITY_DN22423_c0_g2	1784	TRINITY_DN22423_c0_g2_i1;TRINITY_DN22423_c0_g2_i2;TRINITY_DN22423_c0_g2_i3;TRINITY_DN22423_c0_g2_i4;TRINITY_DN22423_c0_g2_i5;TRINITY_DN22423_c0_g2_i6;TRINITY_DN22423_c0_g2_i7	probable protein phosphatase 2C 2 [Medicago truncatula]	At2g30020	Probable protein phosphatase 2C 25 OS=Arabidopsis thaliana GN=At2g30020 PE=1 SV=1	GO:0004722(protein serine/threonine phosphatase activity);GO:0005634(nucleus);GO:0006470(protein dephosphorylation);GO:0009536(plastid);GO:0009611(response to wounding);GO:0009620(response to fungus);GO:0009738(abscisic acid-activated signaling pathway);GO:0046872(metal ion binding);GO:0050832(defense response to fungus)	COG0631(Phosphatase)	NA	NA	NA	NA(NA)	I1MBC9.1 PF00481.19;PP2C;	420.09	16.24	4.87147	up	1.00622e-37	1.26948e-34	yes
TRINITY_DN21502_c0_g5	737	TRINITY_DN21502_c0_g5_i1;TRINITY_DN21502_c0_g5_i2;TRINITY_DN21502_c0_g5_i3;TRINITY_DN21502_c0_g5_i4	tetratricopeptide-like helical domain-containing protein [Artemisia annua]	-	-	-	ENOG410YM19(NA)	-	-	-	-	A0A061EMH5.1 PF13432.4;TPR_16;	717.9	17.08	5.575	up	1.123e-37	1.35522e-34	yes
TRINITY_DN14898_c1_g6	754	TRINITY_DN14898_c1_g6_i1	hypothetical protein MTR_3g092630 [Medicago truncatula]	-	-	-	-	-	-	-	-	-	394.12	6.73	6.06951	up	5.01411e-37	5.79882e-34	yes
TRINITY_DN18256_c0_g5	1699	TRINITY_DN18256_c0_g5_i1;TRINITY_DN18256_c0_g5_i2	uncharacterized protein LOC11415255 [Medicago truncatula]	-	-	GO:0003674(molecular_function);GO:0008150(biological_process);GO:0009507(chloroplast);GO:0016021(integral component of membrane)	ENOG410YFZ5(Protein of unknown function (DUF793))	-	-	-	-	G7IBZ7.1 PF05633.9;DUF793;	375.55	11.15	5.25839	up	7.42794e-37	8.24679e-34	yes
TRINITY_DN21321_c1_g6	1076	TRINITY_DN21321_c1_g6_i1	uncharacterized protein LOC11425383 [Medicago truncatula]	-	-	GO:0003674(molecular_function);GO:0005634(nucleus)	ENOG410YRN3(NA)	NA	NA	NA	NA(NA)	G7IAV0.1 PF14009.4;DUF4228;	222.87	2.75	6.51198	up	1.24772e-36	1.33198e-33	yes
TRINITY_DN19835_c0_g2	746	TRINITY_DN19835_c0_g2_i1;TRINITY_DN19835_c0_g2_i2;TRINITY_DN19835_c0_g2_i3;TRINITY_DN19835_c0_g2_i4;TRINITY_DN19835_c0_g2_i5	transcription factor MYB13 [Medicago truncatula]	MYB4	Myb-related protein Myb4 OS=Oryza sativa subsp. japonica GN=MYB4 PE=2 SV=2	GO:0000981(RNA polymerase II transcription factor activity, sequence-specific DNA binding);GO:0001135(transcription factor activity, RNA polymerase II transcription factor recruiting);GO:0003677(DNA binding);GO:0003700(DNA binding transcription factor activity);GO:0005634(nucleus);GO:0006351(transcription, DNA-templated);GO:0006355(regulation of transcription, DNA-templated);GO:0006357(regulation…	COG5147(Myblike DNAbinding domain containing protein)	NA	NA	NA	NA(NA)	A0A072TFF0.1 PF00249.29;Myb_DNA-binding;	92.72	1.24	6.97439	up	2.55256e-36	2.62403e-33	yes
TRINITY_DN16588_c0_g3	738	TRINITY_DN16588_c0_g3_i1;TRINITY_DN16588_c0_g3_i2;TRINITY_DN16588_c0_g3_i3;TRINITY_DN16588_c0_g3_i4;TRINITY_DN16588_c0_g3_i5;TRINITY_DN16588_c0_g3_i6	BON1-associated protein 2 [Medicago truncatula]	-	-	-	-	-	-	-	-	A0A072TNG9.1 PF00168.28;C2;	88.02	0.63	7.36422	up	4.20688e-36	4.17022e-33	yes
TRINITY_DN15754_c1_g2	1173	TRINITY_DN15754_c1_g2_i1;TRINITY_DN15754_c1_g2_i2	-	-	-	-	-	-	-	-	-	-	142.62	3.15	5.83301	up	1.32179e-35	1.26509e-32	yes
TRINITY_DN20970_c1_g1	2921	TRINITY_DN20970_c1_g1_i1;TRINITY_DN20970_c1_g1_i10;TRINITY_DN20970_c1_g1_i11;TRINITY_DN20970_c1_g1_i2;TRINITY_DN20970_c1_g1_i3;TRINITY_DN20970_c1_g1_i4;TRINITY_DN20970_c1_g1_i5;TRINITY_DN20970_c1_g1_i6;TRINITY_DN20970_c1_g1_i7;TRINITY_DN20970_c1_g1_i8;TRINITY_DN20970_c1_g1_i9	temperature-sensitive omega-3 fatty acid desaturase [Medicago truncatula]	FAD7	Omega-3 fatty acid desaturase, chloroplastic OS=Glycine max GN=FAD7 PE=2 SV=1	GO:0006629(lipid metabolic process);GO:0006633(fatty acid biosynthetic process);GO:0006636(unsaturated fatty acid biosynthetic process);GO:0009266(response to temperature stimulus);GO:0009507(chloroplast);GO:0009941(chloroplast envelope);GO:0016021(integral component of membrane);GO:0016717(oxidoreductase activity, acting on paired donors, with oxidation of a pair of donors resulting in the reduc…	COG3239(linoleoyl-CoA desaturase activity)	NA	NA	NA	NA(NA)	A0A072U157.1 PF00487.22;FA_desaturase;	144.22	4.99	5.1021	up	1.96382e-35	1.81693e-32	yes
TRINITY_DN15798_c0_g2	1159	TRINITY_DN15798_c0_g2_i1;TRINITY_DN15798_c0_g2_i2;TRINITY_DN15798_c0_g2_i3;TRINITY_DN15798_c0_g2_i4;TRINITY_DN15798_c0_g2_i5;TRINITY_DN15798_c0_g2_i6	nudix hydrolase 17, mitochondrial [Medicago truncatula]	NUDT17	Nudix hydrolase 17, mitochondrial OS=Arabidopsis thaliana GN=NUDT17 PE=2 SV=1	GO:0005634(nucleus);GO:0005737(cytoplasm);GO:0005739(mitochondrion);GO:0016787(hydrolase activity);GO:0016818(hydrolase activity, acting on acid anhydrides, in phosphorus-containing anhydrides);GO:0046872(metal ion binding)	COG0494(Nudix hydrolase)	NA	NA	NA	NA(NA)	G8A033.1 PF00293.26;NUDIX;	65.66	1.03	6.66698	up	5.44779e-35	4.87771e-32	yes
TRINITY_DN21916_c0_g2	1576	TRINITY_DN21916_c0_g2_i1;TRINITY_DN21916_c0_g2_i2;TRINITY_DN21916_c0_g2_i3;TRINITY_DN21916_c0_g2_i4;TRINITY_DN21916_c0_g2_i5;TRINITY_DN21916_c0_g2_i6;TRINITY_DN21916_c0_g2_i7	jasmonate zim-domain protein [Medicago truncatula]	TIFY11C	Protein TIFY 11c OS=Oryza sativa subsp. indica GN=TIFY11C PE=3 SV=1	GO:0003714(transcription corepressor activity);GO:0005634(nucleus);GO:0009611(response to wounding);GO:0031347(regulation of defense response);GO:1903507(negative regulation of nucleic acid-templated transcription);GO:2000022(regulation of jasmonic acid mediated signaling pathway)	ENOG410ZDCD(jasmonate ZIM domain-containing protein)	K13464	jasmonate ZIM domain-containing protein	-	mtr04075(Plant hormone signal transduction)	A0A072V2U3.1 PF06200.12;tify;	242.38	4.66	5.87618	up	6.64909e-34	5.76725e-31	yes
TRINITY_DN25432_c1_g2	597	TRINITY_DN25432_c1_g2_i1	uncharacterized protein LOC11425226 [Medicago truncatula]	-	-	-	ENOG410YKFM(expressed protein)	-	-	-	-	-	520.36	16.8	5.12626	up	3.0857e-33	2.59535e-30	yes
TRINITY_DN15578_c0_g2	1848	TRINITY_DN15578_c0_g2_i1;TRINITY_DN15578_c0_g2_i2	uncharacterized protein LOC25493370 [Medicago truncatula]	-	-	GO:0000147(actin cortical patch assembly);GO:0005884(actin filament);GO:0006897(endocytosis);GO:0008360(regulation of cell shape);GO:0030048(actin filament-based movement);GO:0030479(actin cortical patch);GO:0051015(actin filament binding);GO:0051127(positive regulation of actin nucleation);GO:0051666(actin cortical patch localization)	ENOG410YYYW(Ethylene-responsive nuclear protein)	-	-	-	-	-	183.55	6.82	4.922	up	3.41413e-33	2.78713e-30	yes
TRINITY_DN19987_c0_g1	1446	TRINITY_DN19987_c0_g1_i1;TRINITY_DN19987_c0_g1_i2;TRINITY_DN19987_c0_g1_i3;TRINITY_DN19987_c0_g1_i4;TRINITY_DN19987_c0_g1_i5;TRINITY_DN19987_c0_g1_i6	NACsa [Medicago truncatula]	NAC081	Protein ATAF2 OS=Arabidopsis thaliana GN=NAC081 PE=1 SV=1	GO:0003677(DNA binding);GO:0005515(protein binding);GO:0005634(nucleus);GO:0006351(transcription, DNA-templated);GO:0007275(multicellular organism development);GO:0008361(regulation of cell size);GO:0009416(response to light stimulus);GO:0009611(response to wounding);GO:0009620(response to fungus);GO:0009744(response to sucrose);GO:0009751(response to salicylic acid);GO:0009753(response to jasmon…	ENOG410YE96(Nac domain-containing protein)	NA	NA	NA	NA(NA)	G7JC85.1 PF02365.13;NAM;	770.34	32.76	4.61533	up	4.39108e-33	3.48226e-30	yes
TRINITY_DN24217_c0_g3	620	TRINITY_DN24217_c0_g3_i1;TRINITY_DN24217_c0_g3_i2;TRINITY_DN24217_c0_g3_i3;TRINITY_DN24217_c0_g3_i4	uncharacterized protein LOC11445276 isoform X2 [Medicago truncatula]	-	-	-	-	-	-	-	-	-	468.45	20.64	4.60866	up	9.68312e-33	7.46568e-30	yes
TRINITY_DN24581_c0_g1	1666	TRINITY_DN24581_c0_g1_i1;TRINITY_DN24581_c0_g1_i2	protein ALP1-like [Medicago truncatula]	At3g55350	Protein ALP1-like OS=Arabidopsis thaliana GN=At3g55350 PE=2 SV=1	GO:0005634(nucleus);GO:0005774(vacuolar membrane);GO:0005886(plasma membrane);GO:0009507(chloroplast);GO:0016020(membrane)	ENOG411206Y(transposon protein)	NA	NA	NA	NA(NA)	A0A061FLA8.1 PF13359.4;DDE_Tnp_4;	60.9	1.24	5.63574	up	2.04709e-32	1.53565e-29	yes
TRINITY_DN22281_c0_g1	1984	TRINITY_DN22281_c0_g1_i1;TRINITY_DN22281_c0_g1_i2;TRINITY_DN22281_c0_g1_i3;TRINITY_DN22281_c0_g1_i4;TRINITY_DN22281_c0_g1_i5	probable WRKY transcription factor 41 [Medicago truncatula]	WRKY53	Probable WRKY transcription factor 53 OS=Arabidopsis thaliana GN=WRKY53 PE=1 SV=1	GO:0009737(response to abscisic acid)	ENOG410YZU1(Transcription factor)	K16225	probable WRKY transcription factor 52	-	csat04626(Plant-pathogen interaction)	A0A072U5T4.1 PF03106.13;WRKY;	368.29	8.06	5.58369	up	1.09136e-31	7.97152e-29	yes
TRINITY_DN23462_c0_g2	1194	TRINITY_DN23462_c0_g2_i1;TRINITY_DN23462_c0_g2_i2;TRINITY_DN23462_c0_g2_i3;TRINITY_DN23462_c0_g2_i4;TRINITY_DN23462_c0_g2_i5;TRINITY_DN23462_c0_g2_i6	-	-	-	-	-	-	-	-	-	-	172.17	9.31	4.23426	up	1.15458e-31	8.21707e-29	yes
TRINITY_DN15305_c0_g1	1555	TRINITY_DN15305_c0_g1_i1;TRINITY_DN15305_c0_g1_i2;TRINITY_DN15305_c0_g1_i3;TRINITY_DN15305_c0_g1_i4;TRINITY_DN15305_c0_g1_i5;TRINITY_DN15305_c0_g1_i6;TRINITY_DN15305_c0_g1_i7	probable WRKY transcription factor 40 [Medicago truncatula]	WRKY40	Probable WRKY transcription factor 40 OS=Arabidopsis thaliana GN=WRKY40 PE=1 SV=1	GO:0002237(response to molecule of bacterial origin);GO:0003700(DNA binding transcription factor activity);GO:0005515(protein binding);GO:0005634(nucleus);GO:0006351(transcription, DNA-templated);GO:0006355(regulation of transcription, DNA-templated);GO:0009611(response to wounding);GO:0009751(response to salicylic acid);GO:0010200(response to chitin);GO:0031347(regulation of defense response);GO…	ENOG410YHES(WRKY transcription factor)	K18834	WRKY transcription factor 1	-	fve04626(Plant-pathogen interaction)	A0A072VNB5.1 PF03106.13;WRKY;	216.45	7.58	5.0367	up	1.31138e-31	8.90366e-29	yes
TRINITY_DN15651_c0_g1	1740	TRINITY_DN15651_c0_g1_i1;TRINITY_DN15651_c0_g1_i10;TRINITY_DN15651_c0_g1_i2;TRINITY_DN15651_c0_g1_i3;TRINITY_DN15651_c0_g1_i4;TRINITY_DN15651_c0_g1_i5;TRINITY_DN15651_c0_g1_i6;TRINITY_DN15651_c0_g1_i7;TRINITY_DN15651_c0_g1_i8;TRINITY_DN15651_c0_g1_i9	endochitinase PR4 [Medicago truncatula]	CHI4	Endochitinase PR4 OS=Phaseolus vulgaris GN=CHI4 PE=2 SV=1	GO:0000272(polysaccharide catabolic process);GO:0004568(chitinase activity);GO:0005576(extracellular region);GO:0005618(cell wall);GO:0006032(chitin catabolic process);GO:0006952(defense response);GO:0008061(chitin binding);GO:0009611(response to wounding);GO:0009617(response to bacterium);GO:0009626(plant-type hypersensitive response);GO:0010262(somatic embryogenesis);GO:0016998(cell wall macrom…	COG3979(chitinase)	K01183	chitinase	EC:3.2.1.14	mtr00520(Amino sugar and nucleotide sugar metabolism)	A0A0J8BUJ6.1 PF00182.17;Glyco_hydro_19;	171.55	10.36	4.44681	up	1.31521e-31	8.90366e-29	yes
TRINITY_DN22169_c1_g1	1852	TRINITY_DN22169_c1_g1_i1;TRINITY_DN22169_c1_g1_i10;TRINITY_DN22169_c1_g1_i11;TRINITY_DN22169_c1_g1_i12;TRINITY_DN22169_c1_g1_i13;TRINITY_DN22169_c1_g1_i2;TRINITY_DN22169_c1_g1_i3;TRINITY_DN22169_c1_g1_i4;TRINITY_DN22169_c1_g1_i5;TRINITY_DN22169_c1_g1_i6;TRINITY_DN22169_c1_g1_i7;TRINITY_DN22169_c1_g1_i8;TRINITY_DN22169_c1_g1_i9	uncharacterized protein LOC11422627 [Medicago truncatula]	-	-	GO:0003674(molecular_function);GO:0005634(nucleus);GO:0008150(biological_process)	ENOG4111VMA(Protein of unknown function (DUF569))	-	-	-	-	A0A072UPL6.1 PF04601.11;DUF569;	267.98	11.27	4.69657	up	2.78756e-31	1.84218e-28	yes
TRINITY_DN18482_c0_g3	1027	TRINITY_DN18482_c0_g3_i1;TRINITY_DN18482_c0_g3_i2;TRINITY_DN18482_c0_g3_i3	F-box protein At1g61340 [Medicago truncatula]	At1g61340	F-box protein At1g61340 OS=Arabidopsis thaliana GN=At1g61340 PE=2 SV=1	GO:0003674(molecular_function);GO:0005634(nucleus);GO:0016567(protein ubiquitination)	ENOG410YXQR(F-box protein)	-	-	-	-	W9QRD6.1 PF00646.31;F-box;	59.72	2.48	4.55129	up	3.76684e-31	2.43145e-28	yes
TRINITY_DN15455_c1_g2	972	TRINITY_DN15455_c1_g2_i1;TRINITY_DN15455_c1_g2_i2;TRINITY_DN15455_c1_g2_i3	ethylene-responsive transcription factor 9 [Medicago truncatula]	ERF4	Ethylene-responsive transcription factor 4 OS=Nicotiana tabacum GN=ERF4 PE=1 SV=1	GO:0003677(DNA binding);GO:0003700(DNA binding transcription factor activity);GO:0005622(intracellular);GO:0005634(nucleus);GO:0006351(transcription, DNA-templated);GO:0006355(regulation of transcription, DNA-templated);GO:0006952(defense response);GO:0009873(ethylene-activated signaling pathway);GO:0016020(membrane);GO:0019760(glucosinolate metabolic process);GO:0043565(sequence-specific DNA bin…	ENOG41116MF(Transcription factor)	NA	NA	NA	NA(NA)	A0A067JVT3.1 PF00847.18;AP2;	155.93	8.4	4.39673	up	9.25285e-31	5.83686e-28	yes
TRINITY_DN15960_c0_g1	1429	TRINITY_DN15960_c0_g1_i1;TRINITY_DN15960_c0_g1_i2;TRINITY_DN15960_c0_g1_i3;TRINITY_DN15960_c0_g1_i4	mitogen-activated protein kinase kinase kinase 18 [Medicago truncatula]	byr2	Protein kinase byr2 OS=Schizosaccharomyces pombe (strain 972 / ATCC 24843) GN=byr2 PE=1 SV=1	GO:0005737(cytoplasm)	ENOG410XQGS(mitogen-activated protein kinase kinase kinase)	K20716	mitogen-activated protein kinase kinase kinase 17/18	-	hbr04016(MAPK signaling pathway - plant)	G7JZL6.2 PF00069.23;Pkinase;	128.71	2.14	5.90006	up	1.06317e-30	6.55763e-28	yes
TRINITY_DN16673_c1_g2	1736	TRINITY_DN16673_c1_g2_i1;TRINITY_DN16673_c1_g2_i2;TRINITY_DN16673_c1_g2_i3;TRINITY_DN16673_c1_g2_i4;TRINITY_DN16673_c1_g2_i5;TRINITY_DN16673_c1_g2_i6;TRINITY_DN16673_c1_g2_i7	tryptophan synthase beta chain 1 [Medicago truncatula]	TSB	Tryptophan synthase beta chain 2, chloroplastic OS=Camptotheca acuminata GN=TSB PE=2 SV=1	GO:0004834(tryptophan synthase activity);GO:0005737(cytoplasm);GO:0030170(pyridoxal phosphate binding)	COG0133(The beta subunit is responsible for the synthesis of L- tryptophan from indole and L-serine (By similarity))	K01696	tryptophan synthase beta chain	EC:4.2.1.20	mtr00260(Glycine, serine and threonine metabolism);mtr00400(Phenylalanine, tyrosine and tryptophan biosynthesis)	G7K113.1 PF00291.23;PALP;	166.42	2.23	6.31457	up	2.34881e-30	1.41725e-27	yes
TRINITY_DN20356_c1_g2	845	TRINITY_DN20356_c1_g2_i1;TRINITY_DN20356_c1_g2_i10;TRINITY_DN20356_c1_g2_i11;TRINITY_DN20356_c1_g2_i12;TRINITY_DN20356_c1_g2_i13;TRINITY_DN20356_c1_g2_i14;TRINITY_DN20356_c1_g2_i2;TRINITY_DN20356_c1_g2_i3;TRINITY_DN20356_c1_g2_i4;TRINITY_DN20356_c1_g2_i5;TRINITY_DN20356_c1_g2_i6;TRINITY_DN20356_c1_g2_i7;TRINITY_DN20356_c1_g2_i8;TRINITY_DN20356_c1_g2_i9	-	-	-	-	-	-	-	-	-	-	637.29	42.25	4.15019	up	5.34734e-30	3.12737e-27	yes
TRINITY_DN23462_c0_g4	903	TRINITY_DN23462_c0_g4_i1;TRINITY_DN23462_c0_g4_i2;TRINITY_DN23462_c0_g4_i3;TRINITY_DN23462_c0_g4_i4;TRINITY_DN23462_c0_g4_i5;TRINITY_DN23462_c0_g4_i6	-	-	-	-	-	-	-	-	-	-	106.48	6.64	4.17105	up	5.40834e-30	3.12737e-27	yes
TRINITY_DN16120_c0_g1	2131	TRINITY_DN16120_c0_g1_i1;TRINITY_DN16120_c0_g1_i2;TRINITY_DN16120_c0_g1_i3	scarecrow-like protein 21 [Medicago truncatula]	CIGR1	Chitin-inducible gibberellin-responsive protein 1 OS=Oryza sativa subsp. japonica GN=CIGR1 PE=2 SV=1	GO:0003700(DNA binding transcription factor activity);GO:0005634(nucleus);GO:0006355(regulation of transcription, DNA-templated);GO:0043565(sequence-specific DNA binding)	ENOG4111JS8(chitin-inducible gibberellin-responsive protein)	K14494	DELLA protein	-	bna04075(Plant hormone signal transduction)	I1LUT0.1 PF03514.12;GRAS;	264.2	14.31	4.25207	up	6.47551e-30	3.66804e-27	yes
TRINITY_DN24616_c0_g1	1669	TRINITY_DN24616_c0_g1_i1;TRINITY_DN24616_c0_g1_i10;TRINITY_DN24616_c0_g1_i11;TRINITY_DN24616_c0_g1_i12;TRINITY_DN24616_c0_g1_i2;TRINITY_DN24616_c0_g1_i3;TRINITY_DN24616_c0_g1_i4;TRINITY_DN24616_c0_g1_i5;TRINITY_DN24616_c0_g1_i6;TRINITY_DN24616_c0_g1_i7;TRINITY_DN24616_c0_g1_i8;TRINITY_DN24616_c0_g1_i9	NAC domain-containing protein 2 [Medicago truncatula]	NAC002	NAC domain-containing protein 2 OS=Arabidopsis thaliana GN=NAC002 PE=2 SV=2	GO:0003677(DNA binding);GO:0003700(DNA binding transcription factor activity);GO:0005634(nucleus);GO:0006351(transcription, DNA-templated);GO:0006355(regulation of transcription, DNA-templated);GO:0007275(multicellular organism development);GO:0009611(response to wounding);GO:0009788(negative regulation of abscisic acid-activated signaling pathway)	ENOG410YE96(Nac domain-containing protein)	NA	NA	NA	NA(NA)	B9H7H2.1 PF02365.13;NAM;	489.61	36.65	4.24692	up	1.25578e-29	6.97108e-27	yes
TRINITY_DN16517_c0_g1	1164	TRINITY_DN16517_c0_g1_i1;TRINITY_DN16517_c0_g1_i2;TRINITY_DN16517_c0_g1_i3	unknown [Medicago truncatula]	-	-	GO:0003674(molecular_function);GO:0005634(nucleus);GO:0008150(biological_process)	ENOG410YTUU(NA)	-	-	-	-	-	2.81	67.92	-4.41327	down	1.49291e-29	8.12493e-27	yes
TRINITY_DN22698_c0_g1	2839	TRINITY_DN22698_c0_g1_i1;TRINITY_DN22698_c0_g1_i10;TRINITY_DN22698_c0_g1_i2;TRINITY_DN22698_c0_g1_i3;TRINITY_DN22698_c0_g1_i4;TRINITY_DN22698_c0_g1_i5;TRINITY_DN22698_c0_g1_i6;TRINITY_DN22698_c0_g1_i7;TRINITY_DN22698_c0_g1_i8;TRINITY_DN22698_c0_g1_i9	putative transferase, protein kinase RLK-Pelle-RLCK-VIIa-2 family [Medicago truncatula]	PIX13	Probable serine/threonine-protein kinase PIX13 OS=Arabidopsis thaliana GN=PIX13 PE=1 SV=2	GO:0004675(transmembrane receptor protein serine/threonine kinase activity);GO:0005524(ATP binding);GO:0005634(nucleus);GO:0005886(plasma membrane);GO:0006468(protein phosphorylation);GO:0006952(defense response);GO:0007166(cell surface receptor signaling pathway);GO:0009507(chloroplast);GO:0016301(kinase activity)	COG0515(Serine Threonine protein kinase)	NA	NA	NA	NA(NA)	G7K031.2 PF00069.23;Pkinase;	209.26	8.78	4.91048	up	1.76479e-29	9.41992e-27	yes
TRINITY_DN24976_c0_g1	2199	TRINITY_DN24976_c0_g1_i1;TRINITY_DN24976_c0_g1_i2;TRINITY_DN24976_c0_g1_i3;TRINITY_DN24976_c0_g1_i4;TRINITY_DN24976_c0_g1_i5;TRINITY_DN24976_c0_g1_i6	9-cis-epoxycarotenoid dioxygenase NCED1, chloroplastic [Medicago truncatula]	NCED1	9-cis-epoxycarotenoid dioxygenase NCED1, chloroplastic OS=Phaseolus vulgaris GN=NCED1 PE=2 SV=1	GO:0006970(response to osmotic stress);GO:0009414(response to water deprivation);GO:0009507(chloroplast);GO:0009535(chloroplast thylakoid membrane);GO:0009570(chloroplast stroma);GO:0009688(abscisic acid biosynthetic process);GO:0042538(hyperosmotic salinity response);GO:0045549(9-cis-epoxycarotenoid dioxygenase activity);GO:0046872(metal ion binding);GO:0055114(oxidation-reduction process)	COG3670(dioxygenase)	K09840	9-cis-epoxycarotenoid dioxygenase	EC:1.13.11.51	mtr00906(Carotenoid biosynthesis)	A0A072V8S5.1 PF03055.13;RPE65;	148.84	7.21	4.52977	up	2.5247e-29	1.32218e-26	yes
TRINITY_DN23673_c0_g3	802	TRINITY_DN23673_c0_g3_i1;TRINITY_DN23673_c0_g3_i2	probable E3 ubiquitin-protein ligase XERICO [Medicago truncatula]	XERICO	Probable E3 ubiquitin-protein ligase XERICO OS=Arabidopsis thaliana GN=XERICO PE=1 SV=1	GO:0043161(proteasome-mediated ubiquitin-dependent protein catabolic process);GO:0061630(ubiquitin protein ligase activity)	ENOG41121N2(zinc ion binding)	NA	NA	NA	NA(NA)	G7J361.1 PF13639.4;zf-RING_2;	100.94	4.01	4.83024	up	3.06019e-29	1.57294e-26	yes
TRINITY_DN21534_c1_g3	1258	TRINITY_DN21534_c1_g3_i1;TRINITY_DN21534_c1_g3_i2	ethylene-responsive transcription factor ERF026 [Medicago truncatula]	ERF025	Ethylene-responsive transcription factor ERF025 OS=Arabidopsis thaliana GN=ERF025 PE=2 SV=1	GO:0003677(DNA binding);GO:0003700(DNA binding transcription factor activity);GO:0005634(nucleus);GO:0006351(transcription, DNA-templated);GO:0006355(regulation of transcription, DNA-templated);GO:0009873(ethylene-activated signaling pathway);GO:0019760(glucosinolate metabolic process);GO:0043565(sequence-specific DNA binding);GO:0044212(transcription regulatory region DNA binding);GO:0045893(pos…	ENOG410YMJJ(Transcription factor)	NA	NA	NA	NA(NA)	V7CE48.1 PF00847.18;AP2;	16.4	0	11.7255	up	5.76241e-29	2.90803e-26	yes
TRINITY_DN21916_c0_g1	777	TRINITY_DN21916_c0_g1_i1;TRINITY_DN21916_c0_g1_i2;TRINITY_DN21916_c0_g1_i3;TRINITY_DN21916_c0_g1_i4;TRINITY_DN21916_c0_g1_i5;TRINITY_DN21916_c0_g1_i6	protein TIFY 10B [Medicago truncatula]	TIFY10B	Protein TIFY 10b OS=Oryza sativa subsp. japonica GN=TIFY10B PE=1 SV=1	GO:0003714(transcription corepressor activity);GO:0005634(nucleus);GO:0009611(response to wounding);GO:0031347(regulation of defense response);GO:1903507(negative regulation of nucleic acid-templated transcription);GO:2000022(regulation of jasmonic acid mediated signaling pathway)	ENOG410ZDCD(jasmonate ZIM domain-containing protein)	K13464	jasmonate ZIM domain-containing protein	-	mtr04075(Plant hormone signal transduction)	A0A072V6Y0.1 PF06200.12;tify;	831.42	47.95	4.28645	up	6.58699e-29	3.26479e-26	yes
TRINITY_DN21321_c1_g1	1681	TRINITY_DN21321_c1_g1_i1;TRINITY_DN21321_c1_g1_i2	phospholipase A1-Ibeta2, chloroplastic [Medicago truncatula]	At4g16820	Phospholipase A1-Ibeta2, chloroplastic OS=Arabidopsis thaliana GN=At4g16820 PE=1 SV=2	GO:0004806(triglyceride lipase activity);GO:0006629(lipid metabolic process);GO:0008970(phosphatidylcholine 1-acylhydrolase activity);GO:0009507(chloroplast);GO:0016042(lipid catabolic process);GO:0047714(galactolipase activity)	ENOG4111RPC(galactolipase activity)	K16818	phospholipase A1	EC:3.1.1.32	mtr00564(Glycerophospholipid metabolism);mtr00592(alpha-Linolenic acid metabolism)	A0A072V0H2.1 PF01764.23;Lipase_3;	10.86	0.05	7.83546	up	5.4382e-28	2.64812e-25	yes
TRINITY_DN21411_c0_g1	572	TRINITY_DN21411_c0_g1_i1;TRINITY_DN21411_c0_g1_i2;TRINITY_DN21411_c0_g1_i3;TRINITY_DN21411_c0_g1_i4	heat shock cognate 70 kDa protein 2 [Medicago truncatula]	MED37C	Probable mediator of RNA polymerase II transcription subunit 37c OS=Arabidopsis thaliana GN=MED37C PE=1 SV=1	GO:0005524(ATP binding);GO:0005618(cell wall);GO:0005634(nucleus);GO:0005739(mitochondrion);GO:0005774(vacuolar membrane);GO:0005794(Golgi apparatus);GO:0005829(cytosol);GO:0005886(plasma membrane);GO:0006351(transcription, DNA-templated);GO:0006355(regulation of transcription, DNA-templated);GO:0006457(protein folding);GO:0006986(response to unfolded protein);GO:0009266(response to temperature s…	COG0443(Heat shock protein)	K03283	heat shock 70kDa protein 1/2/6/8	-	mtr03040(Spliceosome);mtr04141(Protein processing in endoplasmic reticulum);mtr04144(Endocytosis)	A0A078IS30.1 PF00012.18;HSP70;	129.11	5.89	4.66162	up	1.46647e-27	7.01783e-25	yes
TRINITY_DN19616_c2_g4	2544	TRINITY_DN19616_c2_g4_i1;TRINITY_DN19616_c2_g4_i2;TRINITY_DN19616_c2_g4_i3;TRINITY_DN19616_c2_g4_i4	putative galactolipase [Medicago truncatula]	-	-	GO:0004806(triglyceride lipase activity);GO:0005576(extracellular region);GO:0006629(lipid metabolic process);GO:0016298(lipase activity)	ENOG410ZUTC(lipase class 3 family protein)	-	-	-	-	A0A067H591.1 PF01764.23;Lipase_3;	81.22	3.11	4.76785	up	3.92292e-27	1.8455e-24	yes
TRINITY_DN21966_c1_g1	1344	TRINITY_DN21966_c1_g1_i1;TRINITY_DN21966_c1_g1_i2;TRINITY_DN21966_c1_g1_i3;TRINITY_DN21966_c1_g1_i4	zinc finger protein ZAT10 [Medicago truncatula]	AZF1	Zinc finger protein AZF1 OS=Arabidopsis thaliana GN=AZF1 PE=2 SV=1	GO:0003700(DNA binding transcription factor activity);GO:0005634(nucleus);GO:0010200(response to chitin);GO:0043565(sequence-specific DNA binding);GO:0044212(transcription regulatory region DNA binding)	COG5048(Zinc finger protein)	-	-	-	-	V7BB96.1 PF13912.4;zf-C2H2_6;	136.85	1.2	6.99316	up	4.1964e-27	1.94125e-24	yes
TRINITY_DN16234_c0_g3	1638	TRINITY_DN16234_c0_g3_i1;TRINITY_DN16234_c0_g3_i2	elongation of fatty acids protein 3-like [Medicago truncatula]	HOS3	Elongation of fatty acids protein 3-like OS=Arabidopsis thaliana GN=HOS3 PE=2 SV=1	GO:0005739(mitochondrion);GO:0009922(fatty acid elongase activity);GO:0016021(integral component of membrane);GO:0019367(fatty acid elongation, saturated fatty acid);GO:0030148(sphingolipid biosynthetic process);GO:0030176(integral component of endoplasmic reticulum membrane);GO:0030497(fatty acid elongation);GO:0034625(fatty acid elongation, monounsaturated fatty acid);GO:0034626(fatty acid elon…	ENOG410XRWT(elongation of very long chain fatty acids protein)	K10249	elongation of very long chain fatty acids protein 4	EC:2.3.1.199	pmum00062(Fatty acid elongation)	A0A072V432.1 PF01151.16;ELO;	32.65	1.34	4.78217	up	4.79903e-27	2.18364e-24	yes
TRINITY_DN23197_c0_g1	2113	TRINITY_DN23197_c0_g1_i1;TRINITY_DN23197_c0_g1_i2;TRINITY_DN23197_c0_g1_i3;TRINITY_DN23197_c0_g1_i4	scarecrow-like protein 33 [Medicago truncatula]	SCL14	Scarecrow-like protein 14 OS=Arabidopsis thaliana GN=SCL14 PE=2 SV=2	GO:0003700(DNA binding transcription factor activity);GO:0005634(nucleus);GO:0006355(regulation of transcription, DNA-templated);GO:0043565(sequence-specific DNA binding)	-	K14494	DELLA protein	-	lang04075(Plant hormone signal transduction)	G7IHQ5.1 PF03514.12;GRAS;	68.67	0.27	8.14607	up	5.12319e-27	2.29354e-24	yes
TRINITY_DN21962_c0_g2	2741	TRINITY_DN21962_c0_g2_i1;TRINITY_DN21962_c0_g2_i10;TRINITY_DN21962_c0_g2_i11;TRINITY_DN21962_c0_g2_i12;TRINITY_DN21962_c0_g2_i13;TRINITY_DN21962_c0_g2_i14;TRINITY_DN21962_c0_g2_i2;TRINITY_DN21962_c0_g2_i3;TRINITY_DN21962_c0_g2_i4;TRINITY_DN21962_c0_g2_i5;TRINITY_DN21962_c0_g2_i6;TRINITY_DN21962_c0_g2_i7;TRINITY_DN21962_c0_g2_i8;TRINITY_DN21962_c0_g2_i9	MACPF domain-containing protein NSL1 [Medicago truncatula]	NSL1	MACPF domain-containing protein NSL1 OS=Arabidopsis thaliana GN=NSL1 PE=2 SV=1	GO:0003674(molecular_function);GO:0005634(nucleus);GO:0005886(plasma membrane);GO:0006955(immune response);GO:0008219(cell death);GO:0009626(plant-type hypersensitive response);GO:0009651(response to salt stress);GO:0010337(regulation of salicylic acid metabolic process);GO:0052542(defense response by callose deposition)	ENOG410ZJIW(MAC/Perforin domain)	K01183	chitinase	EC:3.2.1.14	mtr00520(Amino sugar and nucleotide sugar metabolism)	A0A072UYS7.1 PF01823.17;MACPF;	184.55	8.68	4.63513	up	9.899e-27	4.36122e-24	yes
TRINITY_DN16862_c0_g1	795	TRINITY_DN16862_c0_g1_i1;TRINITY_DN16862_c0_g1_i2;TRINITY_DN16862_c0_g1_i3	translocator protein homolog [Medicago truncatula]	TSPO	Translocator protein homolog OS=Arabidopsis thaliana GN=TSPO PE=1 SV=1	GO:0000139(Golgi membrane);GO:0005739(mitochondrion);GO:0005783(endoplasmic reticulum);GO:0005789(endoplasmic reticulum membrane);GO:0005794(Golgi apparatus);GO:0005795(Golgi stack);GO:0006778(porphyrin-containing compound metabolic process);GO:0006970(response to osmotic stress);GO:0009651(response to salt stress);GO:0009737(response to abscisic acid);GO:0016020(membrane);GO:0016021(integral com…	ENOG410YY8X(TspO/MBR family)	NA	NA	NA	NA(NA)	G7KRV8.1 PF03073.13;TspO_MBR;	343.78	17.67	4.46529	up	2.17747e-26	9.4434e-24	yes
TRINITY_DN13541_c0_g2	1659	TRINITY_DN13541_c0_g2_i1	E3 ubiquitin-protein ligase PUB22 [Medicago truncatula]	PUB22	E3 ubiquitin-protein ligase PUB22 OS=Arabidopsis thaliana GN=PUB22 PE=1 SV=1	GO:0002679(respiratory burst involved in defense response);GO:0004842(ubiquitin-protein transferase activity);GO:0005515(protein binding);GO:0005737(cytoplasm);GO:0005829(cytosol);GO:0006952(defense response);GO:0009414(response to water deprivation);GO:0010200(response to chitin);GO:0016567(protein ubiquitination);GO:0051865(protein autoubiquitination)	ENOG410YC1Z(e3 ubiquitin-protein ligase)	NA	NA	NA	NA(NA)	A0A078J8D7.1 PF04078.11;Rcd1;	110.85	0.72	7.42816	up	2.71409e-26	1.15896e-23	yes
TRINITY_DN14178_c0_g1	507	TRINITY_DN14178_c0_g1_i1;TRINITY_DN14178_c0_g1_i2;TRINITY_DN14178_c0_g1_i3	transcription factor WER [Medicago truncatula]	MYB4	Myb-related protein Myb4 OS=Oryza sativa subsp. japonica GN=MYB4 PE=2 SV=2	GO:0000981(RNA polymerase II transcription factor activity, sequence-specific DNA binding);GO:0001135(transcription factor activity, RNA polymerase II transcription factor recruiting);GO:0003677(DNA binding);GO:0003700(DNA binding transcription factor activity);GO:0005634(nucleus);GO:0006351(transcription, DNA-templated);GO:0006355(regulation of transcription, DNA-templated);GO:0006357(regulation…	COG5147(Myblike DNAbinding domain containing protein)	NA	NA	NA	NA(NA)	K4CG40.1 PF13921.4;Myb_DNA-bind_6;	71.27	0.81	6.66992	up	3.07494e-26	1.29315e-23	yes
TRINITY_DN16559_c0_g6	475	TRINITY_DN16559_c0_g6_i1;TRINITY_DN16559_c0_g6_i2;TRINITY_DN16559_c0_g6_i3;TRINITY_DN16559_c0_g6_i4;TRINITY_DN16559_c0_g6_i5;TRINITY_DN16559_c0_g6_i6	jasmonate zim-domain protein [Medicago truncatula]	TIFY10A	Protein TIFY 10A OS=Arabidopsis thaliana GN=TIFY10A PE=1 SV=1	GO:0003714(transcription corepressor activity);GO:0005634(nucleus);GO:0009611(response to wounding);GO:0031347(regulation of defense response);GO:1903507(negative regulation of nucleic acid-templated transcription);GO:2000022(regulation of jasmonic acid mediated signaling pathway)	ENOG410ZDCD(jasmonate ZIM domain-containing protein)	K13464	jasmonate ZIM domain-containing protein	-	mtr04075(Plant hormone signal transduction)	-	1149.99	80.23	4.03252	up	3.32317e-26	1.37668e-23	yes
TRINITY_DN18470_c0_g1	513	TRINITY_DN18470_c0_g1_i1;TRINITY_DN18470_c0_g1_i2	probable CCR4-associated factor 1 homolog 9 [Medicago truncatula]	CAF1-9	Probable CCR4-associated factor 1 homolog 9 OS=Arabidopsis thaliana GN=CAF1-9 PE=2 SV=1	GO:0000175(3'-5'-exoribonuclease activity);GO:0000288(nuclear-transcribed mRNA catabolic process, deadenylation-dependent decay);GO:0030014(CCR4-NOT complex)	COG5228(Ccr4-not transcription complex, subunit)	K12581	CCR4-NOT transcription complex subunit 7/8	-	cam03018(RNA degradation)	I1M4A3.2 PF04857.18;CAF1;	564.84	11.79	5.83323	up	3.68829e-26	1.48826e-23	yes
TRINITY_DN24071_c2_g3	791	TRINITY_DN24071_c2_g3_i1;TRINITY_DN24071_c2_g3_i2	-	-	-	-	-	-	-	-	-	-	120.13	3.37	5.2993	up	3.69975e-26	1.48826e-23	yes
TRINITY_DN16159_c0_g1	1071	TRINITY_DN16159_c0_g1_i1;TRINITY_DN16159_c0_g1_i2;TRINITY_DN16159_c0_g1_i3;TRINITY_DN16159_c0_g1_i4	unknown [Medicago truncatula]	EXO	Protein EXORDIUM OS=Arabidopsis thaliana GN=EXO PE=2 SV=1	GO:0003674(molecular_function);GO:0005576(extracellular region);GO:0005615(extracellular space);GO:0005618(cell wall);GO:0005794(Golgi apparatus);GO:0005829(cytosol);GO:0009505(plant-type cell wall);GO:0009741(response to brassinosteroid);GO:0048046(apoplast)	-	-	-	-	-	A0A072UYV3.1 PF04674.10;Phi_1;	28.93	0.53	5.93824	up	4.49334e-26	1.78167e-23	yes
TRINITY_DN14791_c0_g1	618	TRINITY_DN14791_c0_g1_i1;TRINITY_DN14791_c0_g1_i2	dirigent protein 2 [Medicago truncatula]	DIR2	Dirigent protein 2 OS=Arabidopsis thaliana GN=DIR2 PE=2 SV=1	GO:0009699(phenylpropanoid biosynthetic process);GO:0042349(guiding stereospecific synthesis activity)	ENOG410YZUA(Disease resistance response protein)	K01870	isoleucyl-tRNA synthetase	EC:6.1.1.5	csat00970(Aminoacyl-tRNA biosynthesis)	G7KWC5.1 PF03018.12;Dirigent;	122.95	9.87	3.82609	up	4.86036e-26	1.90006e-23	yes
TRINITY_DN15362_c0_g2	1653	TRINITY_DN15362_c0_g2_i1;TRINITY_DN15362_c0_g2_i2;TRINITY_DN15362_c0_g2_i3	E3 ubiquitin-protein ligase RDUF2 [Medicago truncatula]	DURF2	E3 ubiquitin-protein ligase RDUF2 OS=Arabidopsis thaliana GN=DURF2 PE=1 SV=1	GO:0000209(protein polyubiquitination);GO:0043161(proteasome-mediated ubiquitin-dependent protein catabolic process);GO:0061630(ubiquitin protein ligase activity)	ENOG41121N2(zinc ion binding)	NA	NA	NA	NA(NA)	G7JCE1.1 PF06547.10;DUF1117;	175.88	11.99	4.0324	up	9.05095e-26	3.48914e-23	yes
TRINITY_DN22169_c1_g3	728	TRINITY_DN22169_c1_g3_i1;TRINITY_DN22169_c1_g3_i2	hypothetical protein TanjilG_20773 [Lupinus angustifolius]	-	-	-	ENOG4111VMA(Protein of unknown function (DUF569))	-	-	-	-	-	53.82	1.89	5.98902	up	9.88057e-26	3.75678e-23	yes
TRINITY_DN13357_c0_g1	808	TRINITY_DN13357_c0_g1_i1;TRINITY_DN13357_c0_g1_i2;TRINITY_DN13357_c0_g1_i3;TRINITY_DN13357_c0_g1_i4;TRINITY_DN13357_c0_g1_i5;TRINITY_DN13357_c0_g1_i6	MTD2 [Medicago truncatula]	-	-	GO:0005515(protein binding);GO:0005634(nucleus);GO:0005829(cytosol);GO:0006511(ubiquitin-dependent protein catabolic process);GO:0008270(zinc ion binding);GO:0009651(response to salt stress);GO:0009737(response to abscisic acid);GO:0016567(protein ubiquitination);GO:0061630(ubiquitin protein ligase activity)	ENOG410XRM0(Ring finger protein)	-	-	-	-	C6T3M9.1 PF13920.4;zf-C3HC4_3;	2.49	89.23	-5.37292	down	1.25115e-25	4.69283e-23	yes
TRINITY_DN20125_c1_g1	2549	TRINITY_DN20125_c1_g1_i1;TRINITY_DN20125_c1_g1_i2;TRINITY_DN20125_c1_g1_i3;TRINITY_DN20125_c1_g1_i4;TRINITY_DN20125_c1_g1_i5;TRINITY_DN20125_c1_g1_i6;TRINITY_DN20125_c1_g1_i7;TRINITY_DN20125_c1_g1_i8	cytochrome P450 family ABA 8'-hydroxylase [Medicago truncatula]	CYP707A3	Abscisic acid 8'-hydroxylase 3 OS=Arabidopsis thaliana GN=CYP707A3 PE=1 SV=1	GO:0007275(multicellular organism development);GO:0009687(abscisic acid metabolic process);GO:0010268(brassinosteroid homeostasis);GO:0010295((+)-abscisic acid 8'-hydroxylase activity);GO:0016125(sterol metabolic process);GO:0016132(brassinosteroid biosynthetic process)	COG2124(Cytochrome p450)	K09843	(+)-abscisic acid 8'-hydroxylase	EC:1.14.13.93	mtr00906(Carotenoid biosynthesis)	G7L7U3.1 PF00067.20;p450;	119.08	1.56	6.1248	up	1.46391e-25	5.41764e-23	yes
TRINITY_DN14712_c0_g5	942	TRINITY_DN14712_c0_g5_i1;TRINITY_DN14712_c0_g5_i2	NDR1/HIN1-like protein 13 [Medicago truncatula]	-	-	GO:0003674(molecular_function);GO:0005886(plasma membrane);GO:0009506(plasmodesma);GO:0016021(integral component of membrane);GO:0042742(defense response to bacterium)	ENOG410YIDD(Harpin-induced protein 1 containing protein, expressed)	-	-	-	-	A0A072V156.1 PF03168.11;LEA_2;	137.75	4.9	4.99284	up	1.54241e-25	5.63304e-23	yes
TRINITY_DN20710_c0_g3	2392	TRINITY_DN20710_c0_g3_i1;TRINITY_DN20710_c0_g3_i2;TRINITY_DN20710_c0_g3_i3	uncharacterized protein LOC25501857 [Medicago truncatula]	-	-	GO:0005794(Golgi apparatus);GO:0008375(acetylglucosaminyltransferase activity);GO:0016757(transferase activity, transferring glycosyl groups)	ENOG410YQKP(Glycosyl transferase family 17 protein)	K00737	beta-1,4-mannosyl-glycoprotein beta-1,4-N-acetylglucosaminyltransferase	EC:2.4.1.144	mtr00510(N-Glycan biosynthesis)	G7JBJ5.1 PF04724.11;Glyco_transf_17;	139.59	8.71	4.19521	up	2.45921e-25	8.86466e-23	yes
TRINITY_DN20496_c0_g2	1414	TRINITY_DN20496_c0_g2_i1;TRINITY_DN20496_c0_g2_i2;TRINITY_DN20496_c0_g2_i3;TRINITY_DN20496_c0_g2_i4;TRINITY_DN20496_c0_g2_i5;TRINITY_DN20496_c0_g2_i6;TRINITY_DN20496_c0_g2_i7;TRINITY_DN20496_c0_g2_i8;TRINITY_DN20496_c0_g2_i9	jasmonate zim-domain protein [Medicago truncatula]	-	-	GO:0003714(transcription corepressor activity);GO:0005634(nucleus);GO:0009611(response to wounding);GO:0031347(regulation of defense response);GO:1903507(negative regulation of nucleic acid-templated transcription);GO:2000022(regulation of jasmonic acid mediated signaling pathway)	-	K13464	jasmonate ZIM domain-containing protein	-	mtr04075(Plant hormone signal transduction)	-	533.33	38.63	3.93964	up	2.75237e-25	9.7942e-23	yes
TRINITY_DN14559_c0_g1	1122	TRINITY_DN14559_c0_g1_i1;TRINITY_DN14559_c0_g1_i2;TRINITY_DN14559_c0_g1_i3;TRINITY_DN14559_c0_g1_i4;TRINITY_DN14559_c0_g1_i5;TRINITY_DN14559_c0_g1_i6;TRINITY_DN14559_c0_g1_i7;TRINITY_DN14559_c0_g1_i8	protein SRC2 [Medicago truncatula]	SRC2	Protein SRC2 OS=Glycine max GN=SRC2 PE=2 SV=1	GO:0000326(protein storage vacuole);GO:0005515(protein binding);GO:0005783(endoplasmic reticulum);GO:0005789(endoplasmic reticulum membrane);GO:0005886(plasma membrane);GO:0006623(protein targeting to vacuole);GO:0016021(integral component of membrane);GO:0032586(protein storage vacuole membrane)	ENOG410YJ7V(C2 domain)	K03006	DNA-directed RNA polymerase II subunit RPB1	EC:2.7.7.6	sbi00230(Purine metabolism);sbi00240(Pyrimidine metabolism);sbi03020(RNA polymerase)	A0A072V6M6.1 PF00168.28;C2;	526.91	28.8	4.36427	up	2.83192e-25	9.94973e-23	yes
TRINITY_DN19592_c0_g1	952	TRINITY_DN19592_c0_g1_i1;TRINITY_DN19592_c0_g1_i2;TRINITY_DN19592_c0_g1_i3;TRINITY_DN19592_c0_g1_i4	putative TFIIIA (or kruppel)-like zinc finger protein [Medicago sativa subsp. x varia]	ZAT6	Zinc finger protein ZAT6 OS=Arabidopsis thaliana GN=ZAT6 PE=2 SV=1	GO:0003700(DNA binding transcription factor activity);GO:0005634(nucleus);GO:0043565(sequence-specific DNA binding);GO:0044212(transcription regulatory region DNA binding)	COG5048(Zinc finger protein)	-	-	-	-	V4T600.1 PF13912.4;zf-C2H2_6;	477.41	30.14	4.14285	up	3.75248e-25	1.30192e-22	yes
TRINITY_DN24217_c0_g2	554	TRINITY_DN24217_c0_g2_i1;TRINITY_DN24217_c0_g2_i2	-	-	-	-	-	-	-	-	-	-	58.12	1.21	5.75201	up	4.16479e-25	1.42714e-22	yes
TRINITY_DN19592_c0_g3	1294	TRINITY_DN19592_c0_g3_i1;TRINITY_DN19592_c0_g3_i2	zinc finger protein ZAT10 [Medicago truncatula]	ZAT6	Zinc finger protein ZAT6 OS=Arabidopsis thaliana GN=ZAT6 PE=2 SV=1	GO:0003700(DNA binding transcription factor activity);GO:0005634(nucleus);GO:0043565(sequence-specific DNA binding);GO:0044212(transcription regulatory region DNA binding)	COG5048(Zinc finger protein)	-	-	-	-	B9GNQ3.2 PF13912.4;zf-C2H2_6;	298.36	20.78	4.02621	up	4.72982e-25	1.60099e-22	yes
TRINITY_DN22373_c1_g2	701	TRINITY_DN22373_c1_g2_i1	zinc finger protein ZAT11 [Medicago truncatula]	ZAT11	Zinc finger protein ZAT11 OS=Arabidopsis thaliana GN=ZAT11 PE=2 SV=1	GO:0003700(DNA binding transcription factor activity);GO:0005634(nucleus);GO:0010200(response to chitin);GO:0043565(sequence-specific DNA binding);GO:0044212(transcription regulatory region DNA binding)	COG5048(Zinc finger protein)	-	-	-	-	G7L0M7.1 PF13912.4;zf-C2H2_6;	278.51	2.69	6.87745	up	7.09705e-25	2.37332e-22	yes
TRINITY_DN21576_c1_g2	1343	TRINITY_DN21576_c1_g2_i1;TRINITY_DN21576_c1_g2_i2;TRINITY_DN21576_c1_g2_i3;TRINITY_DN21576_c1_g2_i4	ethylene-responsive transcription factor RAP2-4 [Medicago truncatula]	RAP2-4	Ethylene-responsive transcription factor RAP2-4 OS=Arabidopsis thaliana GN=RAP2-4 PE=1 SV=1	GO:0003677(DNA binding);GO:0003700(DNA binding transcription factor activity);GO:0005515(protein binding);GO:0005634(nucleus);GO:0006351(transcription, DNA-templated);GO:0006355(regulation of transcription, DNA-templated);GO:0006970(response to osmotic stress);GO:0009409(response to cold);GO:0009414(response to water deprivation);GO:0009416(response to light stimulus);GO:0009611(response to wound…	ENOG410YGN6(Transcription factor)	NA	NA	NA	NA(NA)	C5YKT7.1 PF00847.18;AP2;	416.33	34.87	3.74221	up	7.7375e-25	2.55669e-22	yes
TRINITY_DN18777_c0_g3	1246	TRINITY_DN18777_c0_g3_i1	probable galacturonosyltransferase-like 10 [Medicago truncatula]	GATL9	Probable galacturonosyltransferase-like 9 OS=Arabidopsis thaliana GN=GATL9 PE=2 SV=1	GO:0000271(polysaccharide biosynthetic process);GO:0005794(Golgi apparatus);GO:0016757(transferase activity, transferring glycosyl groups)	ENOG41106K3(glycosyltransferase 8 domain containing)	NA	NA	NA	NA(NA)	G7KJH6.1 PF01501.18;Glyco_transf_8;	74.18	2.85	4.8805	up	1.03192e-24	3.36964e-22	yes
TRINITY_DN24159_c0_g1	2363	TRINITY_DN24159_c0_g1_i1;TRINITY_DN24159_c0_g1_i2;TRINITY_DN24159_c0_g1_i3;TRINITY_DN24159_c0_g1_i4;TRINITY_DN24159_c0_g1_i5	scarecrow-like protein 13 [Medicago truncatula]	SCL13	Scarecrow-like protein 13 OS=Arabidopsis thaliana GN=SCL13 PE=2 SV=2	GO:0003700(DNA binding transcription factor activity);GO:0005634(nucleus);GO:0006355(regulation of transcription, DNA-templated);GO:0043565(sequence-specific DNA binding)	ENOG411183F(Scarecrow-like protein)	K14494	DELLA protein	-	sind04075(Plant hormone signal transduction)	G7JLR5.1 PF03514.12;GRAS;	387.47	25.98	4.09789	up	1.48514e-24	4.7932e-22	yes
TRINITY_DN23804_c0_g2	2616	TRINITY_DN23804_c0_g2_i1;TRINITY_DN23804_c0_g2_i2;TRINITY_DN23804_c0_g2_i3;TRINITY_DN23804_c0_g2_i4;TRINITY_DN23804_c0_g2_i5;TRINITY_DN23804_c0_g2_i6	heat shock protein 83 [Medicago truncatula]	HSP83A	Heat shock protein 83 OS=Ipomoea nil GN=HSP83A PE=2 SV=1	GO:0005515(protein binding);GO:0005524(ATP binding);GO:0005730(nucleolus);GO:0005737(cytoplasm);GO:0005794(Golgi apparatus);GO:0005829(cytosol);GO:0005886(plasma membrane);GO:0006457(protein folding);GO:0009408(response to heat);GO:0016020(membrane);GO:0045087(innate immune response);GO:0051082(unfolded protein binding);GO:0051131(chaperone-mediated protein complex assembly);GO:0071277(cellular r…	COG0326(Molecular chaperone. Has ATPase activity (By similarity))	K04079	molecular chaperone HtpG	-	mtr04141(Protein processing in endoplasmic reticulum);mtr04626(Plant-pathogen interaction)	A0A022QD08.1 PF00183.16;HSP90;	30.11	2.88	3.72917	up	1.84103e-24	5.87352e-22	yes
TRINITY_DN14032_c0_g2	728	TRINITY_DN14032_c0_g2_i1;TRINITY_DN14032_c0_g2_i2;TRINITY_DN14032_c0_g2_i3;TRINITY_DN14032_c0_g2_i4;TRINITY_DN14032_c0_g2_i5;TRINITY_DN14032_c0_g2_i6;TRINITY_DN14032_c0_g2_i7	putative calcium-binding protein CML19 [Medicago truncatula]	-	-	GO:0005509(calcium ion binding)	ENOG410YVEP(NA)	K13448	calcium-binding protein CML	-	mtr04626(Plant-pathogen interaction)	G7JLF5.1 PF13499.4;EF-hand_7;	33.13	0.61	6.39112	up	2.92662e-24	9.23082e-22	yes
TRINITY_DN15535_c0_g1	1261	TRINITY_DN15535_c0_g1_i1;TRINITY_DN15535_c0_g1_i2;TRINITY_DN15535_c0_g1_i3;TRINITY_DN15535_c0_g1_i4;TRINITY_DN15535_c0_g1_i5;TRINITY_DN15535_c0_g1_i6;TRINITY_DN15535_c0_g1_i7;TRINITY_DN15535_c0_g1_i8	nudix hydrolase 18, mitochondrial [Medicago truncatula]	NUDT4	Nudix hydrolase 4 OS=Arabidopsis thaliana GN=NUDT4 PE=1 SV=1	GO:0000210(NAD+ diphosphatase activity);GO:0005634(nucleus);GO:0005737(cytoplasm);GO:0005829(cytosol);GO:0009507(chloroplast);GO:0016787(hydrolase activity);GO:0016818(hydrolase activity, acting on acid anhydrides, in phosphorus-containing anhydrides);GO:0046872(metal ion binding);GO:0047631(ADP-ribose diphosphatase activity)	COG0494(Nudix hydrolase)	NA	NA	NA	NA(NA)	A0A072UAQ3.1 PF00293.26;NUDIX;	1225.69	94.38	3.8856	up	1.19389e-23	3.72334e-21	yes
TRINITY_DN21483_c0_g2	2398	TRINITY_DN21483_c0_g2_i1;TRINITY_DN21483_c0_g2_i2;TRINITY_DN21483_c0_g2_i3;TRINITY_DN21483_c0_g2_i4;TRINITY_DN21483_c0_g2_i5;TRINITY_DN21483_c0_g2_i6;TRINITY_DN21483_c0_g2_i7;TRINITY_DN21483_c0_g2_i8	scarecrow-like protein 21 [Medicago truncatula]	PAT1	Scarecrow-like transcription factor PAT1 OS=Arabidopsis thaliana GN=PAT1 PE=2 SV=1	GO:0003700(DNA binding transcription factor activity);GO:0005634(nucleus);GO:0006355(regulation of transcription, DNA-templated);GO:0043565(sequence-specific DNA binding)	ENOG4111JS8(chitin-inducible gibberellin-responsive protein)	K14494	DELLA protein	-	bna04075(Plant hormone signal transduction)	G7J211.1 PF03514.12;GRAS;	267.5	20.06	3.86573	up	1.3027e-23	4.01753e-21	yes
TRINITY_DN25988_c1_g1	2431	TRINITY_DN25988_c1_g1_i1;TRINITY_DN25988_c1_g1_i10;TRINITY_DN25988_c1_g1_i2;TRINITY_DN25988_c1_g1_i3;TRINITY_DN25988_c1_g1_i4;TRINITY_DN25988_c1_g1_i5;TRINITY_DN25988_c1_g1_i6;TRINITY_DN25988_c1_g1_i7;TRINITY_DN25988_c1_g1_i8;TRINITY_DN25988_c1_g1_i9	transcription factor MYC2 [Medicago truncatula]	MYC2	Transcription factor MYC2 OS=Arabidopsis thaliana GN=MYC2 PE=1 SV=2	GO:0003677(DNA binding);GO:0003700(DNA binding transcription factor activity);GO:0005515(protein binding);GO:0005634(nucleus);GO:0006351(transcription, DNA-templated);GO:0009269(response to desiccation);GO:0009611(response to wounding);GO:0009737(response to abscisic acid);GO:0009738(abscisic acid-activated signaling pathway);GO:0009753(response to jasmonic acid);GO:0009867(jasmonic acid mediated…	ENOG410YCJJ(anthocyanin-containing compound biosynthetic process)	K13422	transcription factor MYC2	-	mtr04016(MAPK signaling pathway - plant);mtr04075(Plant hormone signal transduction)	G7LHR2.2 PF14215.4;bHLH-MYC_N;	317.77	23.62	3.88195	up	2.44121e-23	7.44597e-21	yes
TRINITY_DN19005_c0_g1	1620	TRINITY_DN19005_c0_g1_i1;TRINITY_DN19005_c0_g1_i2	phospholipase A1-Ibeta2, chloroplastic [Medicago truncatula]	At4g16820	Phospholipase A1-Ibeta2, chloroplastic OS=Arabidopsis thaliana GN=At4g16820 PE=1 SV=2	GO:0004806(triglyceride lipase activity);GO:0006629(lipid metabolic process);GO:0008970(phosphatidylcholine 1-acylhydrolase activity);GO:0009507(chloroplast);GO:0016042(lipid catabolic process);GO:0047714(galactolipase activity)	ENOG4111RPC(galactolipase activity)	K16818	phospholipase A1	EC:3.1.1.32	rcu00564(Glycerophospholipid metabolism);rcu00592(alpha-Linolenic acid metabolism)	G7JXH0.1 PF01764.23;Lipase_3;	294.54	19.06	4.10664	up	2.86996e-23	8.65854e-21	yes
TRINITY_DN16159_c0_g2	865	TRINITY_DN16159_c0_g2_i1;TRINITY_DN16159_c0_g2_i2;TRINITY_DN16159_c0_g2_i3;TRINITY_DN16159_c0_g2_i4;TRINITY_DN16159_c0_g2_i5	putative phosphate-induced protein [Medicago truncatula]	EXO	Protein EXORDIUM OS=Arabidopsis thaliana GN=EXO PE=2 SV=1	GO:0003674(molecular_function);GO:0005576(extracellular region);GO:0005615(extracellular space);GO:0005618(cell wall);GO:0005794(Golgi apparatus);GO:0005829(cytosol);GO:0009505(plant-type cell wall);GO:0009741(response to brassinosteroid);GO:0048046(apoplast)	-	-	-	-	-	B7FIZ9.1 PF04674.10;Phi_1;	117.46	6.71	4.80714	up	5.65868e-23	1.68884e-20	yes
TRINITY_DN19804_c0_g2	493	TRINITY_DN19804_c0_g2_i1;TRINITY_DN19804_c0_g2_i2;TRINITY_DN19804_c0_g2_i3	hypothetical protein L195_g013716 [Trifolium pratense]	-	-	GO:0003674(molecular_function);GO:0005634(nucleus);GO:0008150(biological_process)	ENOG410ZGXP(Wound-induced protein)	-	-	-	-	A0A072VAJ9.1 PF12609.6;DUF3774;	12.29	197.9	-3.80163	down	8.85542e-23	2.6148e-20	yes
TRINITY_DN11878_c0_g1	524	TRINITY_DN11878_c0_g1_i1;TRINITY_DN11878_c0_g1_i2	uncharacterized protein LOC112421287 [Medicago truncatula]	-	-	-	-	-	-	-	-	-	130.3	11.88	3.65595	up	1.41429e-22	4.13211e-20	yes
TRINITY_DN19088_c1_g2	1081	TRINITY_DN19088_c1_g2_i1;TRINITY_DN19088_c1_g2_i2;TRINITY_DN19088_c1_g2_i3;TRINITY_DN19088_c1_g2_i4;TRINITY_DN19088_c1_g2_i5;TRINITY_DN19088_c1_g2_i6;TRINITY_DN19088_c1_g2_i7;TRINITY_DN19088_c1_g2_i8;TRINITY_DN19088_c1_g2_i9	probable xyloglucan endotransglucosylase/hydrolase protein 23 [Medicago truncatula]	XTH23	Probable xyloglucan endotransglucosylase/hydrolase protein 23 OS=Arabidopsis thaliana GN=XTH23 PE=2 SV=1	GO:0004553(hydrolase activity, hydrolyzing O-glycosyl compounds);GO:0005576(extracellular region);GO:0005618(cell wall);GO:0005794(Golgi apparatus);GO:0010411(xyloglucan metabolic process);GO:0016762(xyloglucan:xyloglucosyl transferase activity);GO:0016798(hydrolase activity, acting on glycosyl bonds);GO:0042546(cell wall biogenesis);GO:0048046(apoplast);GO:0071555(cell wall organization)	COG2273(hydrolase family 16)	K14504	xyloglucan:xyloglucosyl transferase TCH4	EC:2.4.1.207	mtr04075(Plant hormone signal transduction)	G7JVI0.1 PF00722.19;Glyco_hydro_16;	31.03	1.22	4.8622	up	1.43902e-22	4.16057e-20	yes
TRINITY_DN18993_c0_g1	794	TRINITY_DN18993_c0_g1_i1;TRINITY_DN18993_c0_g1_i2;TRINITY_DN18993_c0_g1_i3;TRINITY_DN18993_c0_g1_i4;TRINITY_DN18993_c0_g1_i5;TRINITY_DN18993_c0_g1_i6;TRINITY_DN18993_c0_g1_i7;TRINITY_DN18993_c0_g1_i8;TRINITY_DN18993_c0_g1_i9	heat shock cognate 70 kDa protein 2 [Medicago truncatula]	HSC-2	Heat shock cognate 70 kDa protein 2 OS=Solanum lycopersicum GN=HSC-2 PE=2 SV=1	GO:0005524(ATP binding);GO:0005737(cytoplasm);GO:0006457(protein folding);GO:0009408(response to heat);GO:0009507(chloroplast);GO:0009941(chloroplast envelope);GO:0046686(response to cadmium ion)	COG0443(Heat shock protein)	K03283	heat shock 70kDa protein 1/2/6/8	-	mtr03040(Spliceosome);mtr04141(Protein processing in endoplasmic reticulum);mtr04144(Endocytosis)	A0A078IS30.1 PF00012.18;HSP70;	122.82	7.49	4.18571	up	1.48262e-22	4.24244e-20	yes
TRINITY_DN16670_c0_g6	1760	TRINITY_DN16670_c0_g6_i1	BTB/POZ domain-containing protein At5g41330 [Medicago truncatula]	At5g41330	BTB/POZ domain-containing protein At5g41330 OS=Arabidopsis thaliana GN=At5g41330 PE=2 SV=1	GO:0005249(voltage-gated potassium channel activity);GO:0005634(nucleus);GO:0006813(potassium ion transport);GO:0008076(voltage-gated potassium channel complex);GO:0016020(membrane);GO:0016567(protein ubiquitination);GO:0051260(protein homooligomerization)	ENOG410XSWI(Potassium channel tetramerisation domain containing 3)	NA	NA	NA	NA(NA)	A0A072TV73.1 PF02214.20;BTB_2;	101.8	6.44	4.15116	up	1.71768e-22	4.86488e-20	yes
TRINITY_DN18578_c0_g3	1243	TRINITY_DN18578_c0_g3_i1;TRINITY_DN18578_c0_g3_i2;TRINITY_DN18578_c0_g3_i3;TRINITY_DN18578_c0_g3_i4;TRINITY_DN18578_c0_g3_i5;TRINITY_DN18578_c0_g3_i6;TRINITY_DN18578_c0_g3_i7	protein TIFY 10a isoform X3 [Medicago truncatula]	TIFY10B	Protein TIFY 10b OS=Oryza sativa subsp. japonica GN=TIFY10B PE=1 SV=1	GO:0003714(transcription corepressor activity);GO:0005634(nucleus);GO:0009611(response to wounding);GO:0031347(regulation of defense response);GO:1903507(negative regulation of nucleic acid-templated transcription);GO:2000022(regulation of jasmonic acid mediated signaling pathway)	ENOG410ZDCD(jasmonate ZIM domain-containing protein)	K13464	jasmonate ZIM domain-containing protein	-	mtr04075(Plant hormone signal transduction)	G7JYL8.2 PF06200.12;tify;	409.95	19.5	4.77564	up	1.87153e-22	5.24709e-20	yes
TRINITY_DN20615_c0_g1	1856	TRINITY_DN20615_c0_g1_i1;TRINITY_DN20615_c0_g1_i10;TRINITY_DN20615_c0_g1_i11;TRINITY_DN20615_c0_g1_i12;TRINITY_DN20615_c0_g1_i13;TRINITY_DN20615_c0_g1_i14;TRINITY_DN20615_c0_g1_i15;TRINITY_DN20615_c0_g1_i16;TRINITY_DN20615_c0_g1_i17;TRINITY_DN20615_c0_g1_i2;TRINITY_DN20615_c0_g1_i3;TRINITY_DN20615_c0_g1_i4;TRINITY_DN20615_c0_g1_i5;TRINITY_DN20615_c0_g1_i6;TRINITY_DN20615_c0_g1_i7;TRINITY_DN20615_…	unknown [Medicago truncatula]	-	-	GO:0003674(molecular_function);GO:0005634(nucleus);GO:0009793(embryo development ending in seed dormancy)	ENOG410YR10(expressed protein)	-	-	-	-	-	6.07	285.3	-5.59448	down	2.86629e-22	7.95567e-20	yes
TRINITY_DN24825_c0_g1	696	TRINITY_DN24825_c0_g1_i1;TRINITY_DN24825_c0_g1_i2;TRINITY_DN24825_c0_g1_i3;TRINITY_DN24825_c0_g1_i4;TRINITY_DN24825_c0_g1_i5;TRINITY_DN24825_c0_g1_i6;TRINITY_DN24825_c0_g1_i7	heat shock cognate 70 kDa protein 2 [Cicer arietinum]	HSC-2	Heat shock cognate 70 kDa protein 2 OS=Solanum lycopersicum GN=HSC-2 PE=2 SV=1	GO:0005524(ATP binding);GO:0005618(cell wall);GO:0005634(nucleus);GO:0005739(mitochondrion);GO:0005774(vacuolar membrane);GO:0005794(Golgi apparatus);GO:0005829(cytosol);GO:0005886(plasma membrane);GO:0006351(transcription, DNA-templated);GO:0006355(regulation of transcription, DNA-templated);GO:0006457(protein folding);GO:0006986(response to unfolded protein);GO:0009266(response to temperature s…	COG0443(Heat shock protein)	K03283	heat shock 70kDa protein 1/2/6/8	-	cam03040(Spliceosome);cam04141(Protein processing in endoplasmic reticulum);cam04144(Endocytosis)	A0A078IS30.1 PF00012.18;HSP70;	313.12	13	4.79448	up	3.23938e-22	8.90219e-20	yes
TRINITY_DN17872_c0_g2	1742	TRINITY_DN17872_c0_g2_i1;TRINITY_DN17872_c0_g2_i2;TRINITY_DN17872_c0_g2_i3;TRINITY_DN17872_c0_g2_i4;TRINITY_DN17872_c0_g2_i5;TRINITY_DN17872_c0_g2_i6;TRINITY_DN17872_c0_g2_i7	probable protein phosphatase 2C 13 [Medicago truncatula]	At1g48040	Probable protein phosphatase 2C 13 OS=Arabidopsis thaliana GN=At1g48040 PE=2 SV=2	GO:0004722(protein serine/threonine phosphatase activity);GO:0006470(protein dephosphorylation);GO:0046872(metal ion binding)	COG0631(Phosphatase)	NA	NA	NA	NA(NA)	A0A072URU6.1 PF00481.19;PP2C;	80.53	8.7	3.39357	up	6.72088e-22	1.82887e-19	yes
TRINITY_DN26038_c1_g8	363	TRINITY_DN26038_c1_g8_i1	-	-	-	-	-	-	-	-	-	-	460.53	43.88	3.57716	up	8.14348e-22	2.19447e-19	yes
TRINITY_DN14817_c1_g4	1682	TRINITY_DN14817_c1_g4_i1;TRINITY_DN14817_c1_g4_i2	ethylene-responsive transcription factor ABR1 [Medicago truncatula]	ABR1	Ethylene-responsive transcription factor ABR1 OS=Arabidopsis thaliana GN=ABR1 PE=2 SV=1	GO:0003677(DNA binding);GO:0003700(DNA binding transcription factor activity);GO:0005634(nucleus);GO:0006351(transcription, DNA-templated);GO:0006355(regulation of transcription, DNA-templated);GO:0006970(response to osmotic stress);GO:0009737(response to abscisic acid);GO:0009738(abscisic acid-activated signaling pathway);GO:0009749(response to glucose);GO:0009788(negative regulation of abscisic…	ENOG410YYVP(AP2)	K12900	FUS-interacting serine-arginine-rich protein 1	-	lang03040(Spliceosome)	I1KTD5.1 PF00847.18;AP2;	29.49	0.17	7.59514	up	8.37908e-22	2.23625e-19	yes
TRINITY_DN16510_c0_g8	1571	TRINITY_DN16510_c0_g8_i1	vinorine synthase [Medicago truncatula]	SALAT	Salutaridinol 7-O-acetyltransferase OS=Papaver somniferum GN=SALAT PE=1 SV=1	GO:0005737(cytoplasm);GO:0009735(response to cytokinin);GO:0016740(transferase activity)	ENOG41116RK(Transferase family)	K13065	shikimate O-hydroxycinnamoyltransferase	EC:2.3.1.133	mtr00940(Phenylpropanoid biosynthesis);mtr00945(Stilbenoid, diarylheptanoid and gingerol biosynthesis);mtr00941(Flavonoid biosynthesis)	A0A072TSP7.1 PF02458.13;Transferase;	46.54	0.06	9.71793	up	1.1966e-21	3.16314e-19	yes
TRINITY_DN21682_c0_g1	1702	TRINITY_DN21682_c0_g1_i1;TRINITY_DN21682_c0_g1_i2;TRINITY_DN21682_c0_g1_i3;TRINITY_DN21682_c0_g1_i4;TRINITY_DN21682_c0_g1_i5	UDP-glucuronate 4-epimerase 1 [Medicago truncatula]	GAE1	UDP-glucuronate 4-epimerase 1 OS=Arabidopsis thaliana GN=GAE1 PE=1 SV=1	GO:0003824(catalytic activity);GO:0005768(endosome);GO:0005794(Golgi apparatus);GO:0005802(trans-Golgi network);GO:0009225(nucleotide-sugar metabolic process);GO:0016021(integral component of membrane);GO:0032580(Golgi cisterna membrane);GO:0033481(galacturonate biosynthetic process);GO:0050378(UDP-glucuronate 4-epimerase activity);GO:0050829(defense response to Gram-negative bacterium);GO:005083…	COG0451(Nad-dependent epimerase dehydratase)	K08679	UDP-glucuronate 4-epimerase	EC:5.1.3.6	mtr00520(Amino sugar and nucleotide sugar metabolism)	I1JGU4.1 PF16363.3;GDP_Man_Dehyd;	338.58	34.75	3.46976	up	1.21736e-21	3.18764e-19	yes
TRINITY_DN18964_c1_g1	1260	TRINITY_DN18964_c1_g1_i1	hypothetical protein GOBAR_AA32410 [Gossypium barbadense]	CYPRO4	Protein CYPRO4 OS=Cynara cardunculus GN=CYPRO4 PE=2 SV=1	GO:0003674(molecular_function);GO:0005737(cytoplasm)	COG5167(vacuolar import and degradation protein)	-	-	-	-	I1KLZ7.1 PF08553.8;VID27;	17.85	0.46	5.41623	up	1.23999e-21	3.21655e-19	yes
TRINITY_DN18963_c0_g1	617	TRINITY_DN18963_c0_g1_i1;TRINITY_DN18963_c0_g1_i2;TRINITY_DN18963_c0_g1_i3;TRINITY_DN18963_c0_g1_i4;TRINITY_DN18963_c0_g1_i5;TRINITY_DN18963_c0_g1_i6;TRINITY_DN18963_c0_g1_i7	-	-	-	-	-	-	-	-	-	-	11.01	811.08	-5.84444	down	1.39034e-21	3.57316e-19	yes
TRINITY_DN13541_c0_g1	1568	TRINITY_DN13541_c0_g1_i1	putative aminoacyltransferase, E1 ubiquitin-activating enzyme [Medicago truncatula]	PUB22	E3 ubiquitin-protein ligase PUB22 OS=Arabidopsis thaliana GN=PUB22 PE=1 SV=1	GO:0002679(respiratory burst involved in defense response);GO:0004842(ubiquitin-protein transferase activity);GO:0005515(protein binding);GO:0005737(cytoplasm);GO:0005829(cytosol);GO:0006952(defense response);GO:0009414(response to water deprivation);GO:0010200(response to chitin);GO:0016567(protein ubiquitination);GO:0051865(protein autoubiquitination)	ENOG410YC1Z(e3 ubiquitin-protein ligase)	NA	NA	NA	NA(NA)	A0A078J8D7.1 PF04078.11;Rcd1;	14.23	0.09	7.61977	up	1.52223e-21	3.87623e-19	yes
TRINITY_DN14217_c0_g4	2651	TRINITY_DN14217_c0_g4_i1;TRINITY_DN14217_c0_g4_i2	L-ascorbate oxidase [Medicago truncatula]	-	L-ascorbate oxidase OS=Cucumis sativus PE=1 SV=1	GO:0005507(copper ion binding);GO:0016722(oxidoreductase activity, oxidizing metal ions)	COG2132(Multicopper oxidase)	K00423	L-ascorbate oxidase	EC:1.10.3.3	tcc00053(Ascorbate and aldarate metabolism)	G7LAE5.1 PF07731.12;Cu-oxidase_2;	32.41	2.18	4.12666	up	1.99781e-21	5.04101e-19	yes
TRINITY_DN21990_c1_g1	1560	TRINITY_DN21990_c1_g1_i1;TRINITY_DN21990_c1_g1_i2;TRINITY_DN21990_c1_g1_i3;TRINITY_DN21990_c1_g1_i4;TRINITY_DN21990_c1_g1_i5;TRINITY_DN21990_c1_g1_i6;TRINITY_DN21990_c1_g1_i7;TRINITY_DN21990_c1_g1_i8;TRINITY_DN21990_c1_g1_i9	mitochondrial uncoupling protein 5 [Medicago truncatula]	PUMP5	Mitochondrial uncoupling protein 5 OS=Arabidopsis thaliana GN=PUMP5 PE=2 SV=1	GO:0003735(structural constituent of ribosome);GO:0006412(translation)	ENOG410XQHU(Mitochondrial)	NA	NA	NA	NA(NA)	G7JXQ1.1 PF00153.25;Mito_carr;	1695.52	167.68	3.51756	up	2.37233e-21	5.9321e-19	yes
TRINITY_DN15238_c0_g2	1620	TRINITY_DN15238_c0_g2_i1	U-box domain-containing protein 20 [Medicago truncatula]	PUB20	U-box domain-containing protein 20 OS=Arabidopsis thaliana GN=PUB20 PE=2 SV=1	GO:0004842(ubiquitin-protein transferase activity);GO:0005737(cytoplasm);GO:0010200(response to chitin);GO:0016567(protein ubiquitination)	ENOG410Y3P9(Ubox domain-containing protein)	K10260	F-box and WD-40 domain protein 7	-	cre04120(Ubiquitin mediated proteolysis)	G7KFZ3.1 PF04564.13;U-box;	86.63	0.57	7.38031	up	3.92113e-21	9.7174e-19	yes
TRINITY_DN20375_c0_g2	1411	TRINITY_DN20375_c0_g2_i1;TRINITY_DN20375_c0_g2_i2;TRINITY_DN20375_c0_g2_i3	CBS domain-containing protein CBSX5 [Medicago truncatula]	CBSX5	CBS domain-containing protein CBSX5 OS=Arabidopsis thaliana GN=CBSX5 PE=2 SV=2	GO:0005576(extracellular region);GO:0008150(biological_process)	ENOG4111QFC(CBS domain-containing protein)	-	-	-	-	A0A072VKT6.1 PF00571.26;CBS;	33.92	3.49	3.43572	up	1.75907e-20	4.32078e-18	yes
TRINITY_DN12182_c0_g1	1500	TRINITY_DN12182_c0_g1_i1	putative aminoacyltransferase, E1 ubiquitin-activating enzyme [Medicago truncatula]	PUB21	U-box domain-containing protein 21 OS=Arabidopsis thaliana GN=PUB21 PE=2 SV=1	GO:0004842(ubiquitin-protein transferase activity);GO:0005634(nucleus);GO:0010200(response to chitin);GO:0016567(protein ubiquitination)	ENOG410Y3P9(Ubox domain-containing protein)	K10260	F-box and WD-40 domain protein 7	-	cre04120(Ubiquitin mediated proteolysis)	G7JZ87.1 PF04564.13;U-box;	12.79	0.07	7.66207	up	2.93967e-20	7.15733e-18	yes
TRINITY_DN16605_c0_g1	1311	TRINITY_DN16605_c0_g1_i1;TRINITY_DN16605_c0_g1_i2;TRINITY_DN16605_c0_g1_i3;TRINITY_DN16605_c0_g1_i4	uncharacterized protein LOC11423377 [Medicago truncatula]	-	-	GO:0004812(aminoacyl-tRNA ligase activity);GO:0005576(extracellular region);GO:0005739(mitochondrion);GO:0008150(biological_process)	ENOG410YV9T(NA)	-	-	-	-	-	134.09	14.7	3.44124	up	3.13494e-20	7.56639e-18	yes
TRINITY_DN25317_c1_g1	3027	TRINITY_DN25317_c1_g1_i1;TRINITY_DN25317_c1_g1_i10;TRINITY_DN25317_c1_g1_i11;TRINITY_DN25317_c1_g1_i12;TRINITY_DN25317_c1_g1_i13;TRINITY_DN25317_c1_g1_i2;TRINITY_DN25317_c1_g1_i3;TRINITY_DN25317_c1_g1_i4;TRINITY_DN25317_c1_g1_i5;TRINITY_DN25317_c1_g1_i6;TRINITY_DN25317_c1_g1_i7;TRINITY_DN25317_c1_g1_i8;TRINITY_DN25317_c1_g1_i9	protein LHY isoform X1 [Medicago truncatula]	LHY	Protein LHY OS=Arabidopsis thaliana GN=LHY PE=1 SV=2	GO:0003677(DNA binding);GO:0003700(DNA binding transcription factor activity);GO:0005634(nucleus);GO:0006351(transcription, DNA-templated);GO:0006355(regulation of transcription, DNA-templated);GO:0007623(circadian rhythm);GO:0009409(response to cold);GO:0009651(response to salt stress);GO:0009723(response to ethylene);GO:0009733(response to auxin);GO:0009737(response to abscisic acid);GO:0009739…	ENOG4111X77(Myb transcription factor)	K12133	MYB-related transcription factor LHY	-	mtr04712(Circadian rhythm - plant)	B9GRS1.2 PF00249.29;Myb_DNA-binding;	355.65	32.96	3.65426	up	5.91998e-20	1.41651e-17	yes
TRINITY_DN18374_c0_g1	803	TRINITY_DN18374_c0_g1_i1;TRINITY_DN18374_c0_g1_i2	uncharacterized protein LOC25488905 [Medicago truncatula]	-	-	GO:0003674(molecular_function);GO:0005739(mitochondrion);GO:0008150(biological_process)	-	-	-	-	-	A0A072UWV1.1 PF14009.4;DUF4228;	63.2	3.04	4.5652	up	7.1785e-20	1.70296e-17	yes
TRINITY_DN17467_c0_g4	1985	TRINITY_DN17467_c0_g4_i1;TRINITY_DN17467_c0_g4_i2	calmodulin [Medicago truncatula]	-	Calcium-binding allergen Ole e 8 OS=Olea europaea PE=1 SV=1	GO:0005509(calcium ion binding)	COG5126(Calcium-binding protein)	K02183	calmodulin	-	mtr04016(MAPK signaling pathway - plant);mtr04070(Phosphatidylinositol signaling system);mtr04626(Plant-pathogen interaction)	G7JNY0.1 PF13499.4;EF-hand_7;	177.31	10.89	4.19194	up	7.51824e-20	1.76844e-17	yes
TRINITY_DN25293_c1_g2	787	TRINITY_DN25293_c1_g2_i1;TRINITY_DN25293_c1_g2_i2;TRINITY_DN25293_c1_g2_i3;TRINITY_DN25293_c1_g2_i4	putative reverse transcriptase, RNA-dependent DNA polymerase [Medicago truncatula]	PRB1	Pathogenesis-related protein 1 OS=Arabidopsis thaliana GN=PRB1 PE=2 SV=1	GO:0003674(molecular_function);GO:0005576(extracellular region);GO:0008150(biological_process)	COG2340(Scp-like extracellular)	K13449	pathogenesis-related protein 1	-	mtr04016(MAPK signaling pathway - plant);mtr04075(Plant hormone signal transduction);mtr04626(Plant-pathogen interaction)	G7IFD2.1 PF00188.24;CAP;	14.64	267.87	-4.42892	down	8.91522e-20	2.07942e-17	yes
TRINITY_DN19857_c0_g1	478	TRINITY_DN19857_c0_g1_i1	unknown [Lotus japonicus]	-	-	-	-	-	-	-	-	-	64.62	3.05	4.61533	up	1.01342e-19	2.34404e-17	yes
TRINITY_DN13949_c0_g3	1284	TRINITY_DN13949_c0_g3_i1	transcription factor MYB73 [Medicago truncatula]	MYB44	Transcription factor MYB44 OS=Arabidopsis thaliana GN=MYB44 PE=2 SV=1	GO:0000981(RNA polymerase II transcription factor activity, sequence-specific DNA binding);GO:0001135(transcription factor activity, RNA polymerase II transcription factor recruiting);GO:0003677(DNA binding);GO:0003700(DNA binding transcription factor activity);GO:0005515(protein binding);GO:0005634(nucleus);GO:0006351(transcription, DNA-templated);GO:0006355(regulation of transcription, DNA-temp…	COG5147(Myblike DNAbinding domain containing protein)	NA	NA	NA	NA(NA)	A0A0D2R0I6.1 PF13921.4;Myb_DNA-bind_6;	80.72	7.06	3.70953	up	2.03955e-19	4.67849e-17	yes
TRINITY_DN14220_c0_g2	1114	TRINITY_DN14220_c0_g2_i1;TRINITY_DN14220_c0_g2_i10;TRINITY_DN14220_c0_g2_i11;TRINITY_DN14220_c0_g2_i12;TRINITY_DN14220_c0_g2_i2;TRINITY_DN14220_c0_g2_i3;TRINITY_DN14220_c0_g2_i4;TRINITY_DN14220_c0_g2_i5;TRINITY_DN14220_c0_g2_i6;TRINITY_DN14220_c0_g2_i7;TRINITY_DN14220_c0_g2_i8;TRINITY_DN14220_c0_g2_i9	protein EARLY RESPONSIVE TO DEHYDRATION 15 [Medicago truncatula]	ERD15	Protein EARLY RESPONSIVE TO DEHYDRATION 15 OS=Arabidopsis thaliana GN=ERD15 PE=1 SV=1	GO:0005515(protein binding);GO:0005737(cytoplasm);GO:0009414(response to water deprivation);GO:0009617(response to bacterium);GO:0009644(response to high light intensity)	ENOG410Z9AB(Polyadenylate-binding protein-interacting protein)	-	-	-	-	-	726.47	66.59	3.67677	up	2.11598e-19	4.81403e-17	yes
TRINITY_DN17588_c0_g2	1162	TRINITY_DN17588_c0_g2_i1;TRINITY_DN17588_c0_g2_i2;TRINITY_DN17588_c0_g2_i3;TRINITY_DN17588_c0_g2_i4;TRINITY_DN17588_c0_g2_i5	amino acid transporter AVT1I isoform X1 [Medicago truncatula]	SLC36A1	Proton-coupled amino acid transporter 1 OS=Homo sapiens GN=SLC36A1 PE=1 SV=1	GO:0003333(amino acid transmembrane transport);GO:0015171(amino acid transmembrane transporter activity)	COG0814(amino acid transport)	NA	NA	NA	NA(NA)	Q2HUT2.1 PF01490.16;Aa_trans;	214.76	7.75	5.07558	up	2.30757e-19	5.20723e-17	yes
TRINITY_DN20214_c0_g10	775	TRINITY_DN20214_c0_g10_i1	thioredoxin h [Medicago sativa]	-	Thioredoxin H-type 2 OS=Nicotiana tabacum PE=3 SV=1	GO:0000103(sulfate assimilation);GO:0005829(cytosol);GO:0005886(plasma membrane);GO:0006457(protein folding);GO:0015035(protein disulfide oxidoreductase activity);GO:0016671(oxidoreductase activity, acting on a sulfur group of donors, disulfide as acceptor);GO:0034599(cellular response to oxidative stress);GO:0045454(cell redox homeostasis);GO:0055114(oxidation-reduction process)	-	NA	NA	NA	NA(NA)	A0A072V2Y4.1 PF00085.18;Thioredoxin;	24.86	0.37	6.34079	up	2.38692e-19	5.34286e-17	yes
TRINITY_DN19483_c0_g1	2150	TRINITY_DN19483_c0_g1_i1;TRINITY_DN19483_c0_g1_i2;TRINITY_DN19483_c0_g1_i3;TRINITY_DN19483_c0_g1_i4;TRINITY_DN19483_c0_g1_i5;TRINITY_DN19483_c0_g1_i6;TRINITY_DN19483_c0_g1_i7	zinc finger CCCH domain-containing protein 29 [Medicago truncatula]	At2g40140	Zinc finger CCCH domain-containing protein 29 OS=Arabidopsis thaliana GN=At2g40140 PE=2 SV=1	GO:0003677(DNA binding);GO:0003700(DNA binding transcription factor activity);GO:0005515(protein binding);GO:0005634(nucleus);GO:0006355(regulation of transcription, DNA-templated);GO:0009409(response to cold);GO:0010200(response to chitin);GO:0046872(metal ion binding);GO:0050832(defense response to fungus)	ENOG410XR0Z(zinc finger CCCH domain-containing protein)	-	-	-	-	A0A0J8D1N5.1 PF10477.7;EIF4E-T;	77.43	2.69	4.95103	up	2.74162e-19	6.08771e-17	yes
TRINITY_DN15535_c0_g4	445	TRINITY_DN15535_c0_g4_i1;TRINITY_DN15535_c0_g4_i2	nudix hydrolase 18, mitochondrial [Medicago truncatula]	-	-	-	-	NA	NA	NA	NA(NA)	-	114.29	12.46	3.38526	up	1.62642e-18	3.58278e-16	yes
TRINITY_DN15253_c1_g2	2491	TRINITY_DN15253_c1_g2_i1;TRINITY_DN15253_c1_g2_i2;TRINITY_DN15253_c1_g2_i3;TRINITY_DN15253_c1_g2_i4;TRINITY_DN15253_c1_g2_i5	exocyst complex component EXO70H1 [Medicago truncatula]	EXO70A1	Exocyst complex component EXO70A1 OS=Arabidopsis thaliana GN=EXO70A1 PE=1 SV=1	GO:0000145(exocyst);GO:0005634(nucleus);GO:0005829(cytosol);GO:0006887(exocytosis);GO:0006904(vesicle docking involved in exocytosis)	ENOG410YIGI(exocyst complex)	NA	NA	NA	NA(NA)	G7IUA9.1 PF03081.13;Exo70;	34.18	3.72	4.02446	up	2.23067e-18	4.87516e-16	yes
TRINITY_DN12650_c0_g1	1025	TRINITY_DN12650_c0_g1_i1	dehydration-responsive element-binding protein 3 [Medicago truncatula]	DREB3	Dehydration-responsive element-binding protein 3 OS=Arabidopsis thaliana GN=DREB3 PE=2 SV=1	GO:0003677(DNA binding);GO:0003700(DNA binding transcription factor activity);GO:0005634(nucleus);GO:0006351(transcription, DNA-templated);GO:0006355(regulation of transcription, DNA-templated);GO:0009873(ethylene-activated signaling pathway);GO:0043565(sequence-specific DNA binding);GO:0045893(positive regulation of transcription, DNA-templated)	ENOG410YM26(dehydration-responsive element-binding protein)	NA	NA	NA	NA(NA)	I1M5H7.1 PF00847.18;AP2;	239.66	10.88	4.61311	up	2.49203e-18	5.4038e-16	yes
TRINITY_DN19322_c0_g2	1134	TRINITY_DN19322_c0_g2_i1;TRINITY_DN19322_c0_g2_i2	calcium-binding allergen Bet v 3 [Medicago truncatula]	BETVIII	Calcium-binding allergen Bet v 3 OS=Betula pendula GN=BETVIII PE=1 SV=1	GO:0005509(calcium ion binding)	COG5126(Calcium-binding protein)	K13448	calcium-binding protein CML	-	mtr04626(Plant-pathogen interaction)	G7KZ68.1 PF13499.4;EF-hand_7;	230.28	22.01	3.60248	up	2.79075e-18	6.00467e-16	yes
TRINITY_DN22099_c0_g2	833	TRINITY_DN22099_c0_g2_i1;TRINITY_DN22099_c0_g2_i2	Avr9/Cf-9 rapidly elicited protein, putative [Medicago truncatula]	-	-	-	ENOG410Z68U(NA)	-	-	-	-	-	68.73	5.74	3.79999	up	4.44674e-18	9.49412e-16	yes
TRINITY_DN25108_c1_g1	3984	TRINITY_DN25108_c1_g1_i1;TRINITY_DN25108_c1_g1_i2;TRINITY_DN25108_c1_g1_i3;TRINITY_DN25108_c1_g1_i4;TRINITY_DN25108_c1_g1_i5;TRINITY_DN25108_c1_g1_i6;TRINITY_DN25108_c1_g1_i7;TRINITY_DN25108_c1_g1_i8	calcium-transporting ATPase 2, plasma membrane-type [Medicago truncatula]	ACA2	Calcium-transporting ATPase 2, plasma membrane-type OS=Arabidopsis thaliana GN=ACA2 PE=1 SV=1	GO:0005388(calcium-transporting ATPase activity);GO:0005887(integral component of plasma membrane);GO:0043231(intracellular membrane-bounded organelle)	ENOG410XNNC(ATPase, Ca transporting, plasma membrane)	NA	NA	NA	NA(NA)	I1J9E1.1 PF00702.24;Hydrolase;	218.21	12.69	3.80534	up	4.71747e-18	9.99528e-16	yes
TRINITY_DN15696_c0_g2	1151	TRINITY_DN15696_c0_g2_i1;TRINITY_DN15696_c0_g2_i2;TRINITY_DN15696_c0_g2_i3;TRINITY_DN15696_c0_g2_i4;TRINITY_DN15696_c0_g2_i5	protein MKS1 [Medicago truncatula]	MKS1	Protein MKS1 OS=Arabidopsis thaliana GN=MKS1 PE=1 SV=2	GO:0005515(protein binding);GO:0005634(nucleus);GO:0006952(defense response);GO:0009870(defense response signaling pathway, resistance gene-dependent)	ENOG410YNID(VQ domain containing protein)	K20725	MAP kinase substrate 1	-	mtr04016(MAPK signaling pathway - plant)	G7LD80.2 PF05678.12;VQ;	81.78	18.89	3.03255	up	5.23038e-18	1.09981e-15	yes
TRINITY_DN13850_c0_g4	1569	TRINITY_DN13850_c0_g4_i1;TRINITY_DN13850_c0_g4_i2	1-aminocyclopropane-1-carboxylate synthase 1 [Medicago truncatula]	ACS1	1-aminocyclopropane-1-carboxylate synthase 1 OS=Prunus mume GN=ACS1 PE=2 SV=1	GO:0005737(cytoplasm);GO:0009693(ethylene biosynthetic process);GO:0016847(1-aminocyclopropane-1-carboxylate synthase activity);GO:0030170(pyridoxal phosphate binding)	COG0436(aminotransferase)	K20772	1-aminocyclopropane-1-carboxylate synthase 1/2/6	EC:4.4.1.14	mtr00270(Cysteine and methionine metabolism);mtr04016(MAPK signaling pathway - plant)	G7L6P5.2 PF00155.19;Aminotran_1_2;	6.8	0.01	9.09457	up	5.29665e-18	1.10537e-15	yes
TRINITY_DN12071_c0_g1	481	TRINITY_DN12071_c0_g1_i1;TRINITY_DN12071_c0_g1_i2	hypothetical protein MtrunA17_Chr8g0391661 [Medicago truncatula]	-	-	-	ENOG41113YT(NA)	-	-	-	-	-	125.1	4.29	4.99807	up	6.62127e-18	1.37149e-15	yes
TRINITY_DN22037_c0_g1	883	TRINITY_DN22037_c0_g1_i1;TRINITY_DN22037_c0_g1_i10;TRINITY_DN22037_c0_g1_i11;TRINITY_DN22037_c0_g1_i2;TRINITY_DN22037_c0_g1_i3;TRINITY_DN22037_c0_g1_i4;TRINITY_DN22037_c0_g1_i5;TRINITY_DN22037_c0_g1_i6;TRINITY_DN22037_c0_g1_i7;TRINITY_DN22037_c0_g1_i8;TRINITY_DN22037_c0_g1_i9	unknown [Medicago truncatula]	-	-	GO:0016787(hydrolase activity)	COG1011(Hydrolase)	NA	NA	NA	NA(NA)	B7FKK9.1 PF13419.4;HAD_2;	861.68	113.09	3.28369	up	7.11809e-18	1.46348e-15	yes
TRINITY_DN21447_c0_g1	662	TRINITY_DN21447_c0_g1_i1;TRINITY_DN21447_c0_g1_i2;TRINITY_DN21447_c0_g1_i3;TRINITY_DN21447_c0_g1_i4;TRINITY_DN21447_c0_g1_i5;TRINITY_DN21447_c0_g1_i6;TRINITY_DN21447_c0_g1_i7;TRINITY_DN21447_c0_g1_i8	dormancy-associated protein 1 [Medicago truncatula]	DRM1	Dormancy-associated protein 1 OS=Pisum sativum GN=DRM1 PE=2 SV=1	GO:0005634(nucleus);GO:0007275(multicellular organism development)	ENOG410YV4V(Auxin-repressed 12.5 kDa)	-	-	-	-	A0A072V3F7.1 PF05564.10;Auxin_repressed;	73.08	1457.62	-4.21142	down	9.05834e-18	1.8487e-15	yes
TRINITY_DN22662_c0_g2	2053	TRINITY_DN22662_c0_g2_i1;TRINITY_DN22662_c0_g2_i2;TRINITY_DN22662_c0_g2_i3;TRINITY_DN22662_c0_g2_i4	uncharacterized protein LOC25491422 [Medicago truncatula]	-	-	GO:0005737(cytoplasm);GO:0008757(S-adenosylmethionine-dependent methyltransferase activity);GO:0032259(methylation)	ENOG410Y23W(NA)	-	-	-	-	A0A072UI89.1 PF05050.10;Methyltransf_21;	136.72	18.4	3.06609	up	9.6487e-18	1.95481e-15	yes
TRINITY_DN25778_c1_g1	680	TRINITY_DN25778_c1_g1_i1;TRINITY_DN25778_c1_g1_i2;TRINITY_DN25778_c1_g1_i3	zinc finger A20 and AN1 domain-containing stress-associated protein 3 [Medicago truncatula]	SAP4	Zinc finger A20 and AN1 domain-containing stress-associated protein 4 OS=Arabidopsis thaliana GN=SAP4 PE=1 SV=1	GO:0003677(DNA binding);GO:0005634(nucleus);GO:0008150(biological_process);GO:0008270(zinc ion binding)	ENOG4111UWC(zinc finger)	-	-	-	-	G7JIG0.1 PF01428.14;zf-AN1;	136.86	17.47	3.13501	up	1.18674e-17	2.38636e-15	yes
TRINITY_DN20599_c0_g3	1492	TRINITY_DN20599_c0_g3_i1;TRINITY_DN20599_c0_g3_i2;TRINITY_DN20599_c0_g3_i3;TRINITY_DN20599_c0_g3_i4;TRINITY_DN20599_c0_g3_i5	uncharacterized protein LOC11443845 isoform X1 [Medicago truncatula]	-	-	-	ENOG410YQTG(NA)	-	-	-	-	-	59.98	6.11	3.40393	up	1.19748e-17	2.38636e-15	yes
TRINITY_DN15362_c0_g3	1362	TRINITY_DN15362_c0_g3_i1	E3 ubiquitin-protein ligase RDUF2 [Medicago truncatula]	DURF2	E3 ubiquitin-protein ligase RDUF2 OS=Arabidopsis thaliana GN=DURF2 PE=1 SV=1	GO:0000209(protein polyubiquitination);GO:0043161(proteasome-mediated ubiquitin-dependent protein catabolic process);GO:0061630(ubiquitin protein ligase activity)	ENOG41121N2(zinc ion binding)	NA	NA	NA	NA(NA)	Q2HS43.1 PF06547.10;DUF1117;	157.47	14.8	3.58948	up	1.20367e-17	2.38636e-15	yes
TRINITY_DN21907_c0_g1	996	TRINITY_DN21907_c0_g1_i1;TRINITY_DN21907_c0_g1_i2;TRINITY_DN21907_c0_g1_i3;TRINITY_DN21907_c0_g1_i4;TRINITY_DN21907_c0_g1_i5;TRINITY_DN21907_c0_g1_i6;TRINITY_DN21907_c0_g1_i7;TRINITY_DN21907_c0_g1_i8;TRINITY_DN21907_c0_g1_i9	chaperonin-like RBCX protein 1, chloroplastic [Medicago truncatula]	RBCX1	Chaperonin-like RBCX protein 1, chloroplastic OS=Arabidopsis thaliana GN=RBCX1 PE=1 SV=1	GO:0009409(response to cold);GO:0009414(response to water deprivation);GO:0009534(chloroplast thylakoid);GO:0009651(response to salt stress);GO:0044183(protein binding involved in protein folding);GO:0061077(chaperone-mediated protein folding)	ENOG4112182(RbcX protein)	-	-	-	-	A0A072V552.1 PF02341.13;RcbX;	2.54	49.34	-3.86222	down	1.26817e-17	2.49641e-15	yes
TRINITY_DN24658_c0_g1	2097	TRINITY_DN24658_c0_g1_i1;TRINITY_DN24658_c0_g1_i2;TRINITY_DN24658_c0_g1_i3;TRINITY_DN24658_c0_g1_i4;TRINITY_DN24658_c0_g1_i5	B2 protein [Medicago truncatula]	-	B2 protein OS=Daucus carota PE=2 SV=1	GO:0005515(protein binding);GO:0005634(nucleus);GO:0005737(cytoplasm)	ENOG410Y94P(DCD)	NA	NA	NA	NA(NA)	V7CTG8.1 PF10539.7;Dev_Cell_Death;	566.1	82.15	2.97767	up	1.36378e-17	2.6657e-15	yes
TRINITY_DN24110_c0_g1	3466	TRINITY_DN24110_c0_g1_i1;TRINITY_DN24110_c0_g1_i10;TRINITY_DN24110_c0_g1_i2;TRINITY_DN24110_c0_g1_i3;TRINITY_DN24110_c0_g1_i4;TRINITY_DN24110_c0_g1_i5;TRINITY_DN24110_c0_g1_i6;TRINITY_DN24110_c0_g1_i7;TRINITY_DN24110_c0_g1_i8;TRINITY_DN24110_c0_g1_i9	beta-amylase [Medicago truncatula]	BMY1	Beta-amylase OS=Glycine max GN=BMY1 PE=1 SV=3	GO:0000272(polysaccharide catabolic process);GO:0005576(extracellular region);GO:0009507(chloroplast);GO:0016161(beta-amylase activity);GO:0102229(amylopectin maltohydrolase activity)	ENOG4110S1W(beta-amylase)	K01177	beta-amylase	EC:3.2.1.2	osa00500(Starch and sucrose metabolism)	G7IKM6.2 PF01373.15;Glyco_hydro_14;	57.26	5.43	3.63082	up	1.49356e-17	2.89897e-15	yes
TRINITY_DN19283_c0_g1	1499	TRINITY_DN19283_c0_g1_i1;TRINITY_DN19283_c0_g1_i2;TRINITY_DN19283_c0_g1_i3	transcription factor bHLH19 [Medicago truncatula]	BHLH25	Transcription factor bHLH25 OS=Arabidopsis thaliana GN=BHLH25 PE=2 SV=2	GO:0003677(DNA binding);GO:0003700(DNA binding transcription factor activity);GO:0005634(nucleus);GO:0006351(transcription, DNA-templated);GO:0006355(regulation of transcription, DNA-templated);GO:0046983(protein dimerization activity)	-	K13422	transcription factor MYC2	-	dct04016(MAPK signaling pathway - plant);dct04075(Plant hormone signal transduction)	G7JGD6.1 PF00010.24;HLH;	15.02	0.01	10.1416	up	1.95628e-17	3.77074e-15	yes
TRINITY_DN18945_c0_g3	1046	TRINITY_DN18945_c0_g3_i1;TRINITY_DN18945_c0_g3_i2;TRINITY_DN18945_c0_g3_i3;TRINITY_DN18945_c0_g3_i4;TRINITY_DN18945_c0_g3_i5;TRINITY_DN18945_c0_g3_i6	protein TIFY 5A [Medicago truncatula]	-	-	GO:0003714(transcription corepressor activity);GO:0005634(nucleus);GO:0009611(response to wounding);GO:0031347(regulation of defense response);GO:1903507(negative regulation of nucleic acid-templated transcription);GO:2000022(regulation of jasmonic acid mediated signaling pathway)	ENOG410Z61E(TIFY 5A-like)	-	-	-	-	-	65.82	0.94	6.90225	up	2.11493e-17	4.0484e-15	yes
TRINITY_DN22919_c0_g2	1192	TRINITY_DN22919_c0_g2_i1;TRINITY_DN22919_c0_g2_i2;TRINITY_DN22919_c0_g2_i3;TRINITY_DN22919_c0_g2_i4;TRINITY_DN22919_c0_g2_i5	-	-	-	-	-	-	-	-	-	-	355.42	37.5	3.45477	up	2.53712e-17	4.81776e-15	yes
TRINITY_DN15551_c0_g4	655	TRINITY_DN15551_c0_g4_i1;TRINITY_DN15551_c0_g4_i2	zinc finger, C3HC4 type (RING finger) protein [Medicago truncatula]	ATL57	RING-H2 finger protein ATL57 OS=Arabidopsis thaliana GN=ATL57 PE=2 SV=1	GO:0000209(protein polyubiquitination);GO:0005886(plasma membrane);GO:0009789(positive regulation of abscisic acid-activated signaling pathway);GO:0043161(proteasome-mediated ubiquitin-dependent protein catabolic process);GO:0061630(ubiquitin protein ligase activity)	-	NA	NA	NA	NA(NA)	A0A072TK01.1 PF13639.4;zf-RING_2;	29.45	0.1	8.4219	up	2.56613e-17	4.81776e-15	yes
TRINITY_DN19859_c0_g1	1364	TRINITY_DN19859_c0_g1_i1;TRINITY_DN19859_c0_g1_i2	ethylene-responsive transcription factor 4 [Medicago truncatula]	ERF4	Ethylene-responsive transcription factor 4 OS=Arabidopsis thaliana GN=ERF4 PE=1 SV=1	GO:0003677(DNA binding);GO:0003700(DNA binding transcription factor activity);GO:0005515(protein binding);GO:0005634(nucleus);GO:0006351(transcription, DNA-templated);GO:0006355(regulation of transcription, DNA-templated);GO:0009723(response to ethylene);GO:0009737(response to abscisic acid);GO:0009864(induced systemic resistance, jasmonic acid mediated signaling pathway);GO:0009873(ethylene-acti…	ENOG410YQ8J(Transcription factor)	NA	NA	NA	NA(NA)	A0A067JVT3.1 PF00847.18;AP2;	291.48	38.6	3.07761	up	2.56892e-17	4.81776e-15	yes
TRINITY_DN15962_c0_g1	654	TRINITY_DN15962_c0_g1_i1;TRINITY_DN15962_c0_g1_i2;TRINITY_DN15962_c0_g1_i3	heat shock cognate 70 kDa protein 2 [Medicago truncatula]	MED37D	Probable mediator of RNA polymerase II transcription subunit 37c OS=Arabidopsis thaliana GN=MED37D PE=1 SV=2	GO:0005515(protein binding);GO:0005524(ATP binding);GO:0005618(cell wall);GO:0005634(nucleus);GO:0005794(Golgi apparatus);GO:0005829(cytosol);GO:0005886(plasma membrane);GO:0006351(transcription, DNA-templated);GO:0006355(regulation of transcription, DNA-templated);GO:0006457(protein folding);GO:0009408(response to heat);GO:0009615(response to virus);GO:0009617(response to bacterium);GO:0034620(c…	COG0443(Heat shock protein)	K03283	heat shock 70kDa protein 1/2/6/8	-	mtr03040(Spliceosome);mtr04141(Protein processing in endoplasmic reticulum);mtr04144(Endocytosis)	A0A078IS30.1 PF00012.18;HSP70;	124.41	13.7	3.37033	up	4.45371e-17	8.29645e-15	yes
TRINITY_DN23959_c0_g3	1059	TRINITY_DN23959_c0_g3_i1;TRINITY_DN23959_c0_g3_i2;TRINITY_DN23959_c0_g3_i3;TRINITY_DN23959_c0_g3_i4;TRINITY_DN23959_c0_g3_i5	NAC domain protein NAC2, partial [Medicago sativa]	NAC081	Protein ATAF2 OS=Arabidopsis thaliana GN=NAC081 PE=1 SV=1	GO:0003677(DNA binding);GO:0005515(protein binding);GO:0005634(nucleus);GO:0006351(transcription, DNA-templated);GO:0007275(multicellular organism development);GO:0008361(regulation of cell size);GO:0009416(response to light stimulus);GO:0009611(response to wounding);GO:0009620(response to fungus);GO:0009744(response to sucrose);GO:0009751(response to salicylic acid);GO:0009753(response to jasmon…	ENOG410YE96(Nac domain-containing protein)	-	-	-	-	-	74.95	9.61	3.12533	up	4.85083e-17	8.97598e-15	yes
TRINITY_DN19936_c0_g1	1942	TRINITY_DN19936_c0_g1_i1;TRINITY_DN19936_c0_g1_i10;TRINITY_DN19936_c0_g1_i11;TRINITY_DN19936_c0_g1_i12;TRINITY_DN19936_c0_g1_i13;TRINITY_DN19936_c0_g1_i14;TRINITY_DN19936_c0_g1_i15;TRINITY_DN19936_c0_g1_i2;TRINITY_DN19936_c0_g1_i3;TRINITY_DN19936_c0_g1_i4;TRINITY_DN19936_c0_g1_i5;TRINITY_DN19936_c0_g1_i6;TRINITY_DN19936_c0_g1_i7;TRINITY_DN19936_c0_g1_i8;TRINITY_DN19936_c0_g1_i9	serine/threonine-protein kinase SRK2E [Medicago truncatula]	SRK2E	Serine/threonine-protein kinase SRK2E OS=Arabidopsis thaliana GN=SRK2E PE=1 SV=1	GO:0004674(protein serine/threonine kinase activity);GO:0005634(nucleus);GO:0005737(cytoplasm);GO:0006468(protein phosphorylation);GO:0035556(intracellular signal transduction)	COG0515(Serine Threonine protein kinase)	K14498	serine/threonine-protein kinase SRK2	EC:2.7.11.1	mtr04016(MAPK signaling pathway - plant);mtr04075(Plant hormone signal transduction)	A0A067EDB5.1 PF00069.23;Pkinase;	8.01	82.13	-2.90922	down	5.88719e-17	1.08215e-14	yes
TRINITY_DN24282_c0_g1	2725	TRINITY_DN24282_c0_g1_i1;TRINITY_DN24282_c0_g1_i2;TRINITY_DN24282_c0_g1_i3;TRINITY_DN24282_c0_g1_i4;TRINITY_DN24282_c0_g1_i5;TRINITY_DN24282_c0_g1_i6	IQ domain-containing protein IQM1 [Medicago truncatula]	IQM4	IQ domain-containing protein IQM4 OS=Arabidopsis thaliana GN=IQM4 PE=2 SV=1	GO:0005516(calmodulin binding);GO:0005634(nucleus);GO:0005737(cytoplasm)	ENOG4111I0K(calmodulin-binding family)	K01214	isoamylase	EC:3.2.1.68	vra00500(Starch and sucrose metabolism)	-	230.97	28.13	3.21434	up	7.24828e-17	1.32357e-14	yes
TRINITY_DN24961_c0_g1	2574	TRINITY_DN24961_c0_g1_i1;TRINITY_DN24961_c0_g1_i2;TRINITY_DN24961_c0_g1_i3;TRINITY_DN24961_c0_g1_i4	uncharacterized protein LOC11444767 [Medicago truncatula]	-	-	GO:0005739(mitochondrion);GO:0005773(vacuole);GO:0008289(lipid binding);GO:0015914(phospholipid transport);GO:0016021(integral component of membrane)	ENOG4111HC0(StAR-related lipid transfer (START) domain containing)	-	-	-	-	G7J8Z0.1 PF01852.17;START;	375.91	46.65	3.14599	up	1.51001e-16	2.73809e-14	yes
TRINITY_DN19561_c0_g3	1100	TRINITY_DN19561_c0_g3_i1;TRINITY_DN19561_c0_g3_i2;TRINITY_DN19561_c0_g3_i3	calmodulin-binding protein 25 [Medicago truncatula]	CAMBP25	Calmodulin-binding protein 25 OS=Arabidopsis thaliana GN=CAMBP25 PE=1 SV=1	GO:0003674(molecular_function);GO:0005634(nucleus);GO:0008150(biological_process)	ENOG410YN0G(VQ motif-containing protein)	-	-	-	-	-	60.54	9.4	2.87156	up	1.51919e-16	2.73809e-14	yes
TRINITY_DN23866_c0_g1	1607	TRINITY_DN23866_c0_g1_i1;TRINITY_DN23866_c0_g1_i10;TRINITY_DN23866_c0_g1_i11;TRINITY_DN23866_c0_g1_i12;TRINITY_DN23866_c0_g1_i13;TRINITY_DN23866_c0_g1_i14;TRINITY_DN23866_c0_g1_i15;TRINITY_DN23866_c0_g1_i16;TRINITY_DN23866_c0_g1_i17;TRINITY_DN23866_c0_g1_i2;TRINITY_DN23866_c0_g1_i3;TRINITY_DN23866_c0_g1_i4;TRINITY_DN23866_c0_g1_i5;TRINITY_DN23866_c0_g1_i6;TRINITY_DN23866_c0_g1_i7;TRINITY_DN23866_…	unknown [Medicago truncatula]	ATJ8	Chaperone protein dnaJ 8, chloroplastic OS=Arabidopsis thaliana GN=ATJ8 PE=2 SV=1	GO:0005634(nucleus);GO:0006457(protein folding);GO:0009416(response to light stimulus);GO:0009507(chloroplast);GO:0009570(chloroplast stroma)	COG0484(ATP binding to DnaK triggers the release of the substrate protein, thus completing the reaction cycle. Several rounds of ATP-dependent interactions between DnaJ, DnaK and GrpE are required for fully efficient folding. Also involved, together with DnaK and GrpE, in the DNA replication of plasmids through activation of initiation proteins (By similarity))	NA	NA	NA	NA(NA)	B7FGF7.1 PF00226.29;DnaJ;	6.04	136.98	-4.46928	down	1.99395e-16	3.57058e-14	yes
TRINITY_DN14261_c0_g1	1112	TRINITY_DN14261_c0_g1_i1;TRINITY_DN14261_c0_g1_i2;TRINITY_DN14261_c0_g1_i3;TRINITY_DN14261_c0_g1_i4	transcription factor bHLH35 isoform X1 [Medicago truncatula]	BHLH35	Transcription factor bHLH35 OS=Arabidopsis thaliana GN=BHLH35 PE=2 SV=1	GO:0003677(DNA binding);GO:0003700(DNA binding transcription factor activity);GO:0005634(nucleus);GO:0006351(transcription, DNA-templated);GO:0006355(regulation of transcription, DNA-templated);GO:0046983(protein dimerization activity)	ENOG410YDYS(Transcription factor)	NA	NA	NA	NA(NA)	K7LC25.1 PF00010.24;HLH;	84.73	7.09	3.74531	up	2.3614e-16	4.20147e-14	yes
TRINITY_DN24871_c0_g1	1546	TRINITY_DN24871_c0_g1_i1;TRINITY_DN24871_c0_g1_i2;TRINITY_DN24871_c0_g1_i3;TRINITY_DN24871_c0_g1_i4;TRINITY_DN24871_c0_g1_i5;TRINITY_DN24871_c0_g1_i6	F-box/kelch-repeat protein At2g44130 [Medicago truncatula]	At1g15670	F-box/kelch-repeat protein At1g15670 OS=Arabidopsis thaliana GN=At1g15670 PE=2 SV=1	GO:0004842(ubiquitin-protein transferase activity);GO:0031463(Cul3-RING ubiquitin ligase complex)	ENOG4110X8D(Kelch repeat-containing F-box family protein)	-	-	-	-	G7LHZ0.1 PF01344.23;Kelch_1;	1.33	44.9	-5.19155	down	2.90766e-16	5.14045e-14	yes
TRINITY_DN21761_c0_g1	986	TRINITY_DN21761_c0_g1_i1;TRINITY_DN21761_c0_g1_i10;TRINITY_DN21761_c0_g1_i2;TRINITY_DN21761_c0_g1_i3;TRINITY_DN21761_c0_g1_i4;TRINITY_DN21761_c0_g1_i5;TRINITY_DN21761_c0_g1_i6;TRINITY_DN21761_c0_g1_i7;TRINITY_DN21761_c0_g1_i8;TRINITY_DN21761_c0_g1_i9	amino acid transporter AVT1I [Medicago truncatula]	slc32a1	Vesicular inhibitory amino acid transporter OS=Xenopus tropicalis GN=slc32a1 PE=2 SV=1	GO:0003333(amino acid transmembrane transport);GO:0015171(amino acid transmembrane transporter activity)	COG0814(amino acid transport)	NA	NA	NA	NA(NA)	G7IX44.2 PF01490.16;Aa_trans;	239.29	10.59	4.53376	up	3.08671e-16	5.42245e-14	yes
TRINITY_DN24927_c0_g5	503	TRINITY_DN24927_c0_g5_i1;TRINITY_DN24927_c0_g5_i2	heat shock cognate 70 kDa protein-like isoform X2 [Abrus precatorius]	HSC-2	Heat shock cognate 70 kDa protein 2 OS=Solanum lycopersicum GN=HSC-2 PE=2 SV=1	GO:0005524(ATP binding);GO:0005737(cytoplasm);GO:0006457(protein folding);GO:0009408(response to heat);GO:0009507(chloroplast);GO:0009941(chloroplast envelope);GO:0046686(response to cadmium ion)	COG0443(Heat shock protein)	K03283	heat shock 70kDa protein 1/2/6/8	-	mtr03040(Spliceosome);mtr04141(Protein processing in endoplasmic reticulum);mtr04144(Endocytosis)	I1GLJ7.1 PF00012.18;HSP70;	53.55	2.06	4.87493	up	3.16201e-16	5.51979e-14	yes
TRINITY_DN19984_c0_g1	1441	TRINITY_DN19984_c0_g1_i1;TRINITY_DN19984_c0_g1_i10;TRINITY_DN19984_c0_g1_i11;TRINITY_DN19984_c0_g1_i12;TRINITY_DN19984_c0_g1_i13;TRINITY_DN19984_c0_g1_i14;TRINITY_DN19984_c0_g1_i15;TRINITY_DN19984_c0_g1_i16;TRINITY_DN19984_c0_g1_i17;TRINITY_DN19984_c0_g1_i18;TRINITY_DN19984_c0_g1_i19;TRINITY_DN19984_c0_g1_i2;TRINITY_DN19984_c0_g1_i20;TRINITY_DN19984_c0_g1_i21;TRINITY_DN19984_c0_g1_i22;TRINITY_DN1…	esterase AGAP003155 isoform X1 [Medicago truncatula]	SPAC22A12.06c	Uncharacterized hydrolase C22A12.06c OS=Schizosaccharomyces pombe (strain 972 / ATCC 24843) GN=SPAC22A12.06c PE=3 SV=1	GO:0004146(dihydrofolate reductase activity);GO:0009507(chloroplast)	ENOG4111JYH(ovarian cancer-associated gene 2 protein)	K02183	calmodulin	-	sita04016(MAPK signaling pathway - plant);sita04070(Phosphatidylinositol signaling system);sita04626(Plant-pathogen interaction)	G7KBG3.1 PF03959.11;FSH1;	198.34	22.46	3.24196	up	7.36015e-16	1.27402e-13	yes
TRINITY_DN18679_c1_g1	1271	TRINITY_DN18679_c1_g1_i1;TRINITY_DN18679_c1_g1_i2;TRINITY_DN18679_c1_g1_i3;TRINITY_DN18679_c1_g1_i4	probable serine/threonine-protein kinase SIS8 [Medicago truncatula]	EDR1	Serine/threonine-protein kinase EDR1 OS=Arabidopsis thaliana GN=EDR1 PE=1 SV=1	GO:0004672(protein kinase activity);GO:0004674(protein serine/threonine kinase activity);GO:0004709(MAP kinase kinase kinase activity);GO:0004712(protein serine/threonine/tyrosine kinase activity);GO:0005515(protein binding);GO:0005524(ATP binding);GO:0005634(nucleus);GO:0006468(protein phosphorylation);GO:0009651(response to salt stress);GO:0010182(sugar mediated signaling pathway);GO:0016301(ki…	COG0515(Serine Threonine protein kinase)	NA	NA	NA	NA(NA)	A0A072UM67.1 PF07714.15;Pkinase_Tyr;	45.04	5.56	3.23652	up	7.39004e-16	1.27402e-13	yes
TRINITY_DN16761_c0_g2	2334	TRINITY_DN16761_c0_g2_i1;TRINITY_DN16761_c0_g2_i2;TRINITY_DN16761_c0_g2_i3;TRINITY_DN16761_c0_g2_i4;TRINITY_DN16761_c0_g2_i5;TRINITY_DN16761_c0_g2_i6;TRINITY_DN16761_c0_g2_i7;TRINITY_DN16761_c0_g2_i8;TRINITY_DN16761_c0_g2_i9	hypothetical protein TSUD_176440 [Trifolium subterraneum]	DESI1	Desumoylating isopeptidase 1 OS=Homo sapiens GN=DESI1 PE=1 SV=1	GO:0003674(molecular_function);GO:0005634(nucleus);GO:0005737(cytoplasm);GO:0008150(biological_process)	ENOG4111H3Z(Desumoylating isopeptidase)	-	-	-	-	C6THR3.1 PF05903.12;Peptidase_C97;	210.2	26.6	3.14143	up	1.11173e-15	1.90476e-13	yes
TRINITY_DN19960_c1_g1	520	TRINITY_DN19960_c1_g1_i1	-	-	-	-	-	-	-	-	-	-	27.51	272.86	-3.14135	down	1.1359e-15	1.93424e-13	yes
TRINITY_DN21541_c0_g2	671	TRINITY_DN21541_c0_g2_i1;TRINITY_DN21541_c0_g2_i2;TRINITY_DN21541_c0_g2_i3;TRINITY_DN21541_c0_g2_i4;TRINITY_DN21541_c0_g2_i5;TRINITY_DN21541_c0_g2_i6;TRINITY_DN21541_c0_g2_i7;TRINITY_DN21541_c0_g2_i8	PREDICTED: probable calcium-binding protein CML27 [Lupinus angustifolius]	CML24	Calcium-binding protein CML24 OS=Arabidopsis thaliana GN=CML24 PE=2 SV=2	GO:0005509(calcium ion binding)	COG5126(Calcium-binding protein)	K13448	calcium-binding protein CML	-	lang04626(Plant-pathogen interaction)	A0A0J8CYG9.1 PF13499.4;EF-hand_7;	1297.03	147.87	3.1613	up	1.2124e-15	2.05191e-13	yes
TRINITY_DN14952_c0_g1	1960	TRINITY_DN14952_c0_g1_i1;TRINITY_DN14952_c0_g1_i2;TRINITY_DN14952_c0_g1_i3	protein DETOXIFICATION 49 [Medicago truncatula]	DTX49	Protein DETOXIFICATION 49 OS=Arabidopsis thaliana GN=DTX49 PE=2 SV=1	GO:0006855(drug transmembrane transport)	COG0534(Mate efflux family protein)	NA	NA	NA	NA(NA)	G7KDH1.1 PF01554.16;MatE;	35.29	2.56	4.08688	up	1.66483e-15	2.80054e-13	yes
TRINITY_DN16733_c0_g1	1369	TRINITY_DN16733_c0_g1_i1;TRINITY_DN16733_c0_g1_i2;TRINITY_DN16733_c0_g1_i3	serine/threonine-protein kinase OXI1 [Medicago truncatula]	OXI1	Serine/threonine-protein kinase OXI1 OS=Arabidopsis thaliana GN=OXI1 PE=1 SV=1	GO:0004674(protein serine/threonine kinase activity);GO:0005634(nucleus);GO:0005737(cytoplasm);GO:0005886(plasma membrane);GO:0035556(intracellular signal transduction)	ENOG410XQ0C(serine threonine-protein kinase)	K20714	serine/threonine-protein kinase OXI1	EC:2.7.11.1	mtr04016(MAPK signaling pathway - plant)	G7LEF2.1 PF00069.23;Pkinase;	40.14	5.25	3.21083	up	1.80875e-15	3.02431e-13	yes
TRINITY_DN21665_c2_g2	1182	TRINITY_DN21665_c2_g2_i1;TRINITY_DN21665_c2_g2_i10;TRINITY_DN21665_c2_g2_i11;TRINITY_DN21665_c2_g2_i12;TRINITY_DN21665_c2_g2_i13;TRINITY_DN21665_c2_g2_i2;TRINITY_DN21665_c2_g2_i3;TRINITY_DN21665_c2_g2_i4;TRINITY_DN21665_c2_g2_i5;TRINITY_DN21665_c2_g2_i6;TRINITY_DN21665_c2_g2_i7;TRINITY_DN21665_c2_g2_i8;TRINITY_DN21665_c2_g2_i9	uncharacterized protein LOC11437066 [Medicago truncatula]	-	-	GO:0005777(peroxisome);GO:0009408(response to heat)	COG0071(response to heat)	K13993	HSP20 family protein	-	mcha04141(Protein processing in endoplasmic reticulum)	G7K3F3.1 PF00011.19;HSP20;	15.75	144.08	-2.78519	down	1.93141e-15	3.21006e-13	yes
TRINITY_DN17179_c0_g1	918	TRINITY_DN17179_c0_g1_i1;TRINITY_DN17179_c0_g1_i2;TRINITY_DN17179_c0_g1_i3;TRINITY_DN17179_c0_g1_i4;TRINITY_DN17179_c0_g1_i5;TRINITY_DN17179_c0_g1_i6;TRINITY_DN17179_c0_g1_i7;TRINITY_DN17179_c0_g1_i8	uncharacterized protein LOC101494553 [Cicer arietinum]	-	-	-	-	-	-	-	-	-	143.95	14.13	3.44474	up	2.27102e-15	3.75204e-13	yes
TRINITY_DN23435_c0_g2	522	TRINITY_DN23435_c0_g2_i1;TRINITY_DN23435_c0_g2_i10;TRINITY_DN23435_c0_g2_i11;TRINITY_DN23435_c0_g2_i12;TRINITY_DN23435_c0_g2_i2;TRINITY_DN23435_c0_g2_i3;TRINITY_DN23435_c0_g2_i4;TRINITY_DN23435_c0_g2_i5;TRINITY_DN23435_c0_g2_i6;TRINITY_DN23435_c0_g2_i7;TRINITY_DN23435_c0_g2_i8;TRINITY_DN23435_c0_g2_i9	putative mitogen-activated protein kinase kinase kinase STE-STE11 family [Medicago truncatula]	-	-	GO:0005737(cytoplasm)	ENOG410XQGS(mitogen-activated protein kinase kinase kinase)	-	-	-	-	-	158.84	5.36	5.09901	up	2.31435e-15	3.80101e-13	yes
TRINITY_DN20103_c1_g1	1256	TRINITY_DN20103_c1_g1_i1;TRINITY_DN20103_c1_g1_i10;TRINITY_DN20103_c1_g1_i11;TRINITY_DN20103_c1_g1_i12;TRINITY_DN20103_c1_g1_i2;TRINITY_DN20103_c1_g1_i3;TRINITY_DN20103_c1_g1_i4;TRINITY_DN20103_c1_g1_i5;TRINITY_DN20103_c1_g1_i6;TRINITY_DN20103_c1_g1_i7;TRINITY_DN20103_c1_g1_i8;TRINITY_DN20103_c1_g1_i9	putative carboxylesterase [Medicago truncatula]	CXE18	Probable carboxylesterase 18 OS=Arabidopsis thaliana GN=CXE18 PE=1 SV=1	GO:0005634(nucleus);GO:0009056(catabolic process);GO:0009860(pollen tube growth);GO:0052689(carboxylic ester hydrolase activity)	COG0657(alpha beta hydrolase fold-3 domain protein)	NA	NA	NA	NA(NA)	G7KP79.1 PF07859.11;Abhydrolase_3;	10.75	70.1	-2.80838	down	2.37154e-15	3.87203e-13	yes
TRINITY_DN17078_c0_g4	1660	TRINITY_DN17078_c0_g4_i1;TRINITY_DN17078_c0_g4_i2;TRINITY_DN17078_c0_g4_i3	transcription factor bHLH13 [Medicago truncatula]	BHLH13	Transcription factor bHLH13 OS=Arabidopsis thaliana GN=BHLH13 PE=2 SV=1	GO:0003677(DNA binding);GO:0003700(DNA binding transcription factor activity);GO:0005515(protein binding);GO:0005634(nucleus);GO:0005737(cytoplasm);GO:0006351(transcription, DNA-templated);GO:0006355(regulation of transcription, DNA-templated);GO:0010629(negative regulation of gene expression);GO:0044212(transcription regulatory region DNA binding);GO:0046983(protein dimerization activity)	ENOG410YCJJ(anthocyanin-containing compound biosynthetic process)	K13422	transcription factor MYC2	-	ghi04016(MAPK signaling pathway - plant);ghi04075(Plant hormone signal transduction)	A0A072U4Q4.1 PF14215.4;bHLH-MYC_N;	110.79	10.55	3.79911	up	2.421e-15	3.92847e-13	yes
TRINITY_DN26169_c0_g4	692	TRINITY_DN26169_c0_g4_i1;TRINITY_DN26169_c0_g4_i2;TRINITY_DN26169_c0_g4_i3;TRINITY_DN26169_c0_g4_i4	putative transcription factor interactor and regulator Znf-B family [Medicago truncatula]	MIP1A	B-box domain protein 30 OS=Arabidopsis thaliana GN=MIP1A PE=1 SV=1	GO:0005634(nucleus)	ENOG411168W(BBOX)	-	-	-	-	I1M418.1 PF00643.22;zf-B_box;	23.66	0.68	5.29132	up	2.43442e-15	3.92847e-13	yes
TRINITY_DN16444_c0_g5	519	TRINITY_DN16444_c0_g5_i1;TRINITY_DN16444_c0_g5_i2	crocetin glucosyltransferase, chloroplastic [Medicago truncatula]	UGT75L6	Crocetin glucosyltransferase, chloroplastic OS=Gardenia jasminoides GN=UGT75L6 PE=1 SV=1	GO:0009813(flavonoid biosynthetic process);GO:0043231(intracellular membrane-bounded organelle);GO:0052696(flavonoid glucuronidation);GO:0080043(quercetin 3-O-glucosyltransferase activity);GO:0080044(quercetin 7-O-glucosyltransferase activity)	COG1819(Transferase)	NA	NA	NA	NA(NA)	G7LH44.1 PF00201.16;UDPGT;	68.28	7	3.45144	up	2.64322e-15	4.24076e-13	yes
TRINITY_DN20037_c0_g1	1278	TRINITY_DN20037_c0_g1_i1;TRINITY_DN20037_c0_g1_i10;TRINITY_DN20037_c0_g1_i11;TRINITY_DN20037_c0_g1_i12;TRINITY_DN20037_c0_g1_i2;TRINITY_DN20037_c0_g1_i3;TRINITY_DN20037_c0_g1_i4;TRINITY_DN20037_c0_g1_i5;TRINITY_DN20037_c0_g1_i6;TRINITY_DN20037_c0_g1_i7;TRINITY_DN20037_c0_g1_i8;TRINITY_DN20037_c0_g1_i9	fatty acid desaturase 4, chloroplastic [Medicago truncatula]	FAD4	Fatty acid desaturase 4, chloroplastic OS=Arabidopsis thaliana GN=FAD4 PE=1 SV=1	GO:0005737(cytoplasm);GO:0031625(ubiquitin protein ligase binding);GO:0061630(ubiquitin protein ligase activity)	ENOG410XRWR(ubiquitin-conjugating enzyme)	NA	NA	NA	NA(NA)	G7IXK5.1 PF10520.7;TMEM189_B_dmain;	156.97	18.61	3.2307	up	3.05538e-15	4.87386e-13	yes
TRINITY_DN20074_c0_g3	1061	TRINITY_DN20074_c0_g3_i1	ethylene-responsive transcription factor ERF017 [Medicago truncatula]	ERF017	Ethylene-responsive transcription factor ERF017 OS=Arabidopsis thaliana GN=ERF017 PE=2 SV=1	GO:0003677(DNA binding);GO:0003700(DNA binding transcription factor activity);GO:0005634(nucleus);GO:0006351(transcription, DNA-templated);GO:0006355(regulation of transcription, DNA-templated);GO:0009873(ethylene-activated signaling pathway)	ENOG410YNX4(Transcription factor)	NA	NA	NA	NA(NA)	A0A059CUB8.1 PF00847.18;AP2;	17.34	0.13	7.2786	up	3.07381e-15	4.87524e-13	yes
TRINITY_DN20057_c1_g3	345	TRINITY_DN20057_c1_g3_i1	-	-	-	-	-	-	-	-	-	-	522.36	81.4	2.87433	up	3.77358e-15	5.95111e-13	yes
TRINITY_DN22873_c0_g1	1761	TRINITY_DN22873_c0_g1_i1;TRINITY_DN22873_c0_g1_i2;TRINITY_DN22873_c0_g1_i3;TRINITY_DN22873_c0_g1_i4;TRINITY_DN22873_c0_g1_i5;TRINITY_DN22873_c0_g1_i6	berberine bridge enzyme-like 21 [Medicago truncatula]	At4g20840	Berberine bridge enzyme-like 21 OS=Arabidopsis thaliana GN=At4g20840 PE=2 SV=1	GO:0005886(plasma membrane);GO:0009055(electron transfer activity);GO:0009507(chloroplast);GO:0016614(oxidoreductase activity, acting on CH-OH group of donors);GO:0048046(apoplast);GO:0050660(flavin adenine dinucleotide binding);GO:0055114(oxidation-reduction process)	COG0277(FAD linked oxidase domain protein)	K01187	alpha-glucosidase	EC:3.2.1.20	lang00052(Galactose metabolism);lang00500(Starch and sucrose metabolism)	G7IMM7.1 PF01565.21;FAD_binding_4;	228.28	33.12	2.92796	up	3.98398e-15	6.24742e-13	yes
TRINITY_DN19408_c2_g4	1153	TRINITY_DN19408_c2_g4_i1;TRINITY_DN19408_c2_g4_i2;TRINITY_DN19408_c2_g4_i3;TRINITY_DN19408_c2_g4_i4;TRINITY_DN19408_c2_g4_i5;TRINITY_DN19408_c2_g4_i6;TRINITY_DN19408_c2_g4_i7	uncharacterized protein At4g22758 [Medicago truncatula]	-	-	GO:0003674(molecular_function);GO:0005634(nucleus)	ENOG410Z7Z7(Pentatricopeptide repeat-containing protein)	-	-	-	-	-	387.4	64.89	2.75955	up	4.88755e-15	7.62129e-13	yes
TRINITY_DN24141_c1_g1	2054	TRINITY_DN24141_c1_g1_i1;TRINITY_DN24141_c1_g1_i2;TRINITY_DN24141_c1_g1_i3;TRINITY_DN24141_c1_g1_i4	inactive beta-amylase 9 [Medicago truncatula]	BAM9	Inactive beta-amylase 9 OS=Arabidopsis thaliana GN=BAM9 PE=2 SV=1	GO:0000272(polysaccharide catabolic process);GO:0005737(cytoplasm);GO:0009507(chloroplast);GO:0016161(beta-amylase activity)	ENOG410YC8N(Beta-amylase)	K01177	beta-amylase	EC:3.2.1.2	csv00500(Starch and sucrose metabolism)	Q5F304.1 PF01373.15;Glyco_hydro_14;	128.01	18.65	2.91259	up	6.22492e-15	9.65245e-13	yes
TRINITY_DN26207_c0_g1	1142	TRINITY_DN26207_c0_g1_i1;TRINITY_DN26207_c0_g1_i10;TRINITY_DN26207_c0_g1_i11;TRINITY_DN26207_c0_g1_i12;TRINITY_DN26207_c0_g1_i2;TRINITY_DN26207_c0_g1_i3;TRINITY_DN26207_c0_g1_i4;TRINITY_DN26207_c0_g1_i5;TRINITY_DN26207_c0_g1_i6;TRINITY_DN26207_c0_g1_i7;TRINITY_DN26207_c0_g1_i8;TRINITY_DN26207_c0_g1_i9	glycine-rich RNA-binding protein GRP1A [Medicago truncatula]	-	Glycine-rich RNA-binding protein GRP1A OS=Sinapis alba PE=2 SV=1	GO:0000380(alternative mRNA splicing, via spliceosome);GO:0003690(double-stranded DNA binding);GO:0003697(single-stranded DNA binding);GO:0003723(RNA binding);GO:0003729(mRNA binding);GO:0005515(protein binding);GO:0005634(nucleus);GO:0005737(cytoplasm);GO:0005739(mitochondrion);GO:0005777(peroxisome);GO:0005829(cytosol);GO:0006406(mRNA export from nucleus);GO:0006970(response to osmotic stress);…	COG0724(Rna-binding protein)	NA	NA	NA	NA(NA)	G7JG73.1 PF00076.20;RRM_1;	46.42	482.61	-3.37869	down	6.4862e-15	1.00017e-12	yes
TRINITY_DN19104_c0_g5	737	TRINITY_DN19104_c0_g5_i1	ethylene-responsive transcription factor ERF106 [Medicago truncatula]	ERF106	Ethylene-responsive transcription factor ERF106 OS=Arabidopsis thaliana GN=ERF106 PE=2 SV=1	GO:0000976(transcription regulatory region sequence-specific DNA binding);GO:0003677(DNA binding);GO:0003700(DNA binding transcription factor activity);GO:0005634(nucleus);GO:0006351(transcription, DNA-templated);GO:0006355(regulation of transcription, DNA-templated);GO:0009414(response to water deprivation);GO:0009873(ethylene-activated signaling pathway);GO:0019760(glucosinolate metabolic proce…	ENOG4111416(Transcription factor)	NA	NA	NA	NA(NA)	G7I303.1 PF00847.18;AP2;	141.55	16.94	3.21992	up	7.67395e-15	1.17679e-12	yes
TRINITY_DN17357_c0_g3	1458	TRINITY_DN17357_c0_g3_i1;TRINITY_DN17357_c0_g3_i2	putative clathrin assembly protein At4g40080 [Medicago truncatula]	At4g40080	Putative clathrin assembly protein At4g40080 OS=Arabidopsis thaliana GN=At4g40080 PE=2 SV=2	GO:0005543(phospholipid binding);GO:0005739(mitochondrion);GO:0005794(Golgi apparatus);GO:0005905(clathrin-coated pit);GO:0006897(endocytosis);GO:0030136(clathrin-coated vesicle)	ENOG410XQ90(Clathrin assembly protein)	NA	NA	NA	NA(NA)	G7J4G9.1 PF07651.14;ANTH;	32.42	3.53	3.34672	up	9.40975e-15	1.43504e-12	yes
TRINITY_DN25557_c2_g2	1607	TRINITY_DN25557_c2_g2_i1;TRINITY_DN25557_c2_g2_i2;TRINITY_DN25557_c2_g2_i3;TRINITY_DN25557_c2_g2_i4	WRKY transcription factor 6 [Medicago truncatula]	WRKY6	WRKY transcription factor 6 OS=Arabidopsis thaliana GN=WRKY6 PE=1 SV=1	GO:0003700(DNA binding transcription factor activity);GO:0005515(protein binding);GO:0005634(nucleus);GO:0006351(transcription, DNA-templated);GO:0006355(regulation of transcription, DNA-templated);GO:0009873(ethylene-activated signaling pathway);GO:0010200(response to chitin);GO:0016036(cellular response to phosphate starvation);GO:0043565(sequence-specific DNA binding);GO:0044212(transcription …	ENOG410YDVM(Transcription factor)	K01892	histidyl-tRNA synthetase	EC:6.1.1.21	mtr00970(Aminoacyl-tRNA biosynthesis)	B9GTA4.1 PF03106.13;WRKY;	66.83	6.92	3.36763	up	1.00133e-14	1.51874e-12	yes
TRINITY_DN20378_c1_g1	1798	TRINITY_DN20378_c1_g1_i1	pentatricopeptide repeat-containing protein At2g35130 [Medicago truncatula]	At2g35130	Pentatricopeptide repeat-containing protein At2g35130 OS=Arabidopsis thaliana GN=At2g35130 PE=2 SV=1	-	ENOG410Z7Z7(Pentatricopeptide repeat-containing protein)	-	-	-	-	A0A072VRN2.1 PF13041.4;PPR_2;	0.58	11.07	-4.0759	down	1.03861e-14	1.56673e-12	yes
TRINITY_DN23435_c0_g1	796	TRINITY_DN23435_c0_g1_i1;TRINITY_DN23435_c0_g1_i2;TRINITY_DN23435_c0_g1_i3;TRINITY_DN23435_c0_g1_i4;TRINITY_DN23435_c0_g1_i5;TRINITY_DN23435_c0_g1_i6;TRINITY_DN23435_c0_g1_i7	mitogen-activated protein kinase kinase kinase 17 [Medicago truncatula]	MEKK1	Mitogen-activated protein kinase kinase kinase 1 OS=Arabidopsis thaliana GN=MEKK1 PE=1 SV=2	GO:0005737(cytoplasm)	ENOG410XQGS(mitogen-activated protein kinase kinase kinase)	K20716	mitogen-activated protein kinase kinase kinase 17/18	-	lang04016(MAPK signaling pathway - plant)	A0A072TH41.1 PF00069.23;Pkinase;	245.29	7.56	4.7783	up	1.22305e-14	1.82519e-12	yes
TRINITY_DN23356_c0_g1	4207	TRINITY_DN23356_c0_g1_i1;TRINITY_DN23356_c0_g1_i2;TRINITY_DN23356_c0_g1_i3;TRINITY_DN23356_c0_g1_i4;TRINITY_DN23356_c0_g1_i5;TRINITY_DN23356_c0_g1_i6	mevalonate kinase [Medicago truncatula]	At5g27450	Mevalonate kinase OS=Arabidopsis thaliana GN=At5g27450 PE=2 SV=1	GO:0004496(mevalonate kinase activity);GO:0005524(ATP binding);GO:0005737(cytoplasm);GO:0005829(cytosol);GO:0016125(sterol metabolic process);GO:0016126(sterol biosynthetic process);GO:0016310(phosphorylation);GO:0019287(isopentenyl diphosphate biosynthetic process, mevalonate pathway)	COG1577(mevalonate kinase)	K00869	mevalonate kinase	EC:2.7.1.36	mtr00900(Terpenoid backbone biosynthesis);mtr04146(Peroxisome)	M0TEG2.1 PF08544.11;GHMP_kinases_C;	67.3	8.53	3.17501	up	1.22311e-14	1.82519e-12	yes
TRINITY_DN14488_c0_g1	3978	TRINITY_DN14488_c0_g1_i1;TRINITY_DN14488_c0_g1_i2;TRINITY_DN14488_c0_g1_i3;TRINITY_DN14488_c0_g1_i4;TRINITY_DN14488_c0_g1_i5	hypothetical protein TSUD_365590 [Trifolium subterraneum]	MKP1	Protein-tyrosine-phosphatase MKP1 OS=Arabidopsis thaliana GN=MKP1 PE=1 SV=1	GO:0000188(inactivation of MAPK activity);GO:0004725(protein tyrosine phosphatase activity);GO:0005634(nucleus);GO:0005829(cytosol);GO:0006470(protein dephosphorylation);GO:0006952(defense response);GO:0009651(response to salt stress);GO:0010224(response to UV-B);GO:0010225(response to UV-C);GO:0017017(MAP kinase tyrosine/serine/threonine phosphatase activity)	COG2453(dual specificity phosphatase)	NA	NA	NA	NA(NA)	A0A067JV31.1 PF00782.18;DSPc;	86.2	13.83	2.85254	up	1.36727e-14	2.02941e-12	yes
TRINITY_DN16672_c0_g3	2555	TRINITY_DN16672_c0_g3_i1;TRINITY_DN16672_c0_g3_i2	O-fucosyltransferase 19 [Medicago truncatula]	At1g04910	Uncharacterized protein At1g04910 OS=Arabidopsis thaliana GN=At1g04910 PE=2 SV=1	GO:0005737(cytoplasm)	ENOG410YKDZ(DUF246 domain-containing protein)	-	-	-	-	K7KDI6.1 PF10250.7;O-FucT;	10.38	0.97	3.59738	up	1.55106e-14	2.28996e-12	yes
TRINITY_DN19894_c0_g5	320	TRINITY_DN19894_c0_g5_i1	-	-	-	-	-	-	-	-	-	-	2.21	135.65	-5.69031	down	1.80962e-14	2.65755e-12	yes
TRINITY_DN13651_c0_g4	1080	TRINITY_DN13651_c0_g4_i1	kiwellin [Medicago truncatula]	-	Kiwellin OS=Actinidia deliciosa PE=1 SV=1	-	ENOG410YH76(Ripening-related protein)	NA	NA	NA	NA(NA)	M1AEA4.1 PF00967.15;Barwin;	17.33	118.67	-2.58467	down	1.88576e-14	2.7548e-12	yes
TRINITY_DN25192_c0_g1	1645	TRINITY_DN25192_c0_g1_i1;TRINITY_DN25192_c0_g1_i2;TRINITY_DN25192_c0_g1_i3;TRINITY_DN25192_c0_g1_i4;TRINITY_DN25192_c0_g1_i5;TRINITY_DN25192_c0_g1_i6;TRINITY_DN25192_c0_g1_i7;TRINITY_DN25192_c0_g1_i8;TRINITY_DN25192_c0_g1_i9	-	-	-	-	-	-	-	-	-	-	75.99	14.08	2.65366	up	2.28698e-14	3.32343e-12	yes
TRINITY_DN11105_c0_g1	529	TRINITY_DN11105_c0_g1_i1;TRINITY_DN11105_c0_g1_i2;TRINITY_DN11105_c0_g1_i3;TRINITY_DN11105_c0_g1_i4	uncharacterized protein LOC25486871 [Medicago truncatula]	-	-	GO:0003674(molecular_function);GO:0005783(endoplasmic reticulum);GO:0009061(anaerobic respiration);GO:0016021(integral component of membrane)	ENOG410Z762(NA)	-	-	-	-	-	42.78	1.18	5.38886	up	2.66234e-14	3.84875e-12	yes
TRINITY_DN16118_c0_g1	1071	TRINITY_DN16118_c0_g1_i1;TRINITY_DN16118_c0_g1_i10;TRINITY_DN16118_c0_g1_i11;TRINITY_DN16118_c0_g1_i12;TRINITY_DN16118_c0_g1_i13;TRINITY_DN16118_c0_g1_i2;TRINITY_DN16118_c0_g1_i3;TRINITY_DN16118_c0_g1_i4;TRINITY_DN16118_c0_g1_i5;TRINITY_DN16118_c0_g1_i6;TRINITY_DN16118_c0_g1_i7;TRINITY_DN16118_c0_g1_i8;TRINITY_DN16118_c0_g1_i9	serine/threonine-protein kinase SAPK2 [Medicago truncatula]	SAPK2	Serine/threonine-protein kinase SAPK2 OS=Oryza sativa subsp. japonica GN=SAPK2 PE=1 SV=1	GO:0004674(protein serine/threonine kinase activity);GO:0005634(nucleus);GO:0005737(cytoplasm);GO:0006468(protein phosphorylation);GO:0035556(intracellular signal transduction)	COG0515(Serine Threonine protein kinase)	K14498	serine/threonine-protein kinase SRK2	EC:2.7.11.1	mtr04016(MAPK signaling pathway - plant);mtr04075(Plant hormone signal transduction)	A0A072V0R0.1 PF00069.23;Pkinase;	157.76	26.29	2.78117	up	2.84626e-14	4.0933e-12	yes
TRINITY_DN23657_c0_g1	1579	TRINITY_DN23657_c0_g1_i1;TRINITY_DN23657_c0_g1_i10;TRINITY_DN23657_c0_g1_i11;TRINITY_DN23657_c0_g1_i2;TRINITY_DN23657_c0_g1_i3;TRINITY_DN23657_c0_g1_i4;TRINITY_DN23657_c0_g1_i5;TRINITY_DN23657_c0_g1_i6;TRINITY_DN23657_c0_g1_i7;TRINITY_DN23657_c0_g1_i8;TRINITY_DN23657_c0_g1_i9	chaperone protein dnaJ C76, chloroplastic [Medicago truncatula]	dnaJ1	Chaperone protein DnaJ 1 OS=Thermus thermophilus (strain HB8 / ATCC 27634 / DSM 579) GN=dnaJ1 PE=3 SV=1	GO:0005737(cytoplasm)	COG1141(Ferredoxin)	NA	NA	NA	NA(NA)	G7IBD4.1 PF00226.29;DnaJ;	1.5	19.85	-3.55157	down	3.05703e-14	4.37375e-12	yes
TRINITY_DN21405_c0_g1	1055	TRINITY_DN21405_c0_g1_i1;TRINITY_DN21405_c0_g1_i10;TRINITY_DN21405_c0_g1_i2;TRINITY_DN21405_c0_g1_i3;TRINITY_DN21405_c0_g1_i4;TRINITY_DN21405_c0_g1_i5;TRINITY_DN21405_c0_g1_i6;TRINITY_DN21405_c0_g1_i7;TRINITY_DN21405_c0_g1_i8;TRINITY_DN21405_c0_g1_i9	uncharacterized protein LOC25489836 [Medicago truncatula]	-	-	GO:0005886(plasma membrane);GO:0015079(potassium ion transmembrane transporter activity)	ENOG4111PGH(NA)	-	-	-	-	A0A072V2G7.1 PF05349.10;GATA-N;	802.76	111.37	3.02145	up	3.43477e-14	4.889e-12	yes
TRINITY_DN15183_c0_g4	871	TRINITY_DN15183_c0_g4_i1	-	-	-	-	-	-	-	-	-	-	12.24	0.25	5.77876	up	3.56685e-14	5.0511e-12	yes
TRINITY_DN23421_c0_g1	1884	TRINITY_DN23421_c0_g1_i1;TRINITY_DN23421_c0_g1_i2;TRINITY_DN23421_c0_g1_i3;TRINITY_DN23421_c0_g1_i4;TRINITY_DN23421_c0_g1_i5;TRINITY_DN23421_c0_g1_i6;TRINITY_DN23421_c0_g1_i7;TRINITY_DN23421_c0_g1_i8	polyol transporter 5 [Medicago truncatula]	PLT5	Polyol transporter 5 OS=Arabidopsis thaliana GN=PLT5 PE=1 SV=2	GO:0005351(carbohydrate:proton symporter activity);GO:0005355(glucose transmembrane transporter activity);GO:0005887(integral component of plasma membrane);GO:0046323(glucose import)	ENOG410XNQK(Transporter)	NA	NA	NA	NA(NA)	A0A072UM27.1 PF00083.22;Sugar_tr;	1257.99	194.45	2.85152	up	3.62134e-14	5.10223e-12	yes
TRINITY_DN18269_c0_g5	724	TRINITY_DN18269_c0_g5_i1	uncharacterized protein LOC25481939 [Medicago truncatula]	-	-	-	ENOG41112XY(NA)	-	-	-	-	-	22.27	0	11.3612	up	4.60731e-14	6.45862e-12	yes
TRINITY_DN19629_c0_g2	938	TRINITY_DN19629_c0_g2_i1;TRINITY_DN19629_c0_g2_i2;TRINITY_DN19629_c0_g2_i3;TRINITY_DN19629_c0_g2_i4;TRINITY_DN19629_c0_g2_i5;TRINITY_DN19629_c0_g2_i6	uncharacterized protein LOC11419998 [Medicago truncatula]	-	-	GO:0003674(molecular_function);GO:0008150(biological_process)	ENOG410YPGG(long cell-linked locus protein)	-	-	-	-	G7IEH4.1 PF05553.9;DUF761;	39.21	3.82	3.92023	up	4.78779e-14	6.67788e-12	yes
TRINITY_DN19932_c1_g3	839	TRINITY_DN19932_c1_g3_i1;TRINITY_DN19932_c1_g3_i2;TRINITY_DN19932_c1_g3_i3;TRINITY_DN19932_c1_g3_i4;TRINITY_DN19932_c1_g3_i5	dehydration-responsive element-binding protein 1f-like [Trifolium pratense]	DREB1D	Dehydration-responsive element-binding protein 1D OS=Arabidopsis thaliana GN=DREB1D PE=2 SV=1	GO:0003677(DNA binding);GO:0003700(DNA binding transcription factor activity);GO:0005634(nucleus);GO:0006351(transcription, DNA-templated);GO:0006355(regulation of transcription, DNA-templated);GO:0009738(abscisic acid-activated signaling pathway);GO:0019760(glucosinolate metabolic process);GO:0043565(sequence-specific DNA binding)	ENOG411074H(Transcriptional activator that binds specifically to the DNA sequence 5'- AG CCGAC-3'. Binding to the C-repeat DRE element mediates high salinity- and dehydration-inducible transcription. Confers resistance to high salt, cold and drought stress (By similarity))	NA	NA	NA	NA(NA)	V7CF76.1 PF00847.18;AP2;	68.63	0.48	7.66954	up	5.79021e-14	8.03566e-12	yes
TRINITY_DN22215_c0_g1	2192	TRINITY_DN22215_c0_g1_i1;TRINITY_DN22215_c0_g1_i2;TRINITY_DN22215_c0_g1_i3;TRINITY_DN22215_c0_g1_i4;TRINITY_DN22215_c0_g1_i5;TRINITY_DN22215_c0_g1_i6;TRINITY_DN22215_c0_g1_i7;TRINITY_DN22215_c0_g1_i8	transmembrane protein 53-A [Medicago truncatula]	-	-	GO:0008150(biological_process);GO:0016787(hydrolase activity)	ENOG4111184(transmembrane protein 53)	-	-	-	-	A0A072VRN3.1 PF05705.12;DUF829;	20.11	2.73	3.05947	up	5.86646e-14	8.10096e-12	yes
TRINITY_DN19137_c0_g1	1028	TRINITY_DN19137_c0_g1_i1;TRINITY_DN19137_c0_g1_i10;TRINITY_DN19137_c0_g1_i11;TRINITY_DN19137_c0_g1_i12;TRINITY_DN19137_c0_g1_i13;TRINITY_DN19137_c0_g1_i14;TRINITY_DN19137_c0_g1_i15;TRINITY_DN19137_c0_g1_i2;TRINITY_DN19137_c0_g1_i3;TRINITY_DN19137_c0_g1_i4;TRINITY_DN19137_c0_g1_i5;TRINITY_DN19137_c0_g1_i6;TRINITY_DN19137_c0_g1_i7;TRINITY_DN19137_c0_g1_i8;TRINITY_DN19137_c0_g1_i9	uncharacterized protein LOC25492690 [Medicago truncatula]	-	-	GO:0009507(chloroplast);GO:0009706(chloroplast inner membrane);GO:0009941(chloroplast envelope);GO:0016021(integral component of membrane)	ENOG41121DM(Uncharacterized protein family, UPF0114)	-	-	-	-	M5X3D0.1 PF03350.14;UPF0114;	31.25	151.12	-2.61406	down	6.3097e-14	8.66991e-12	yes
TRINITY_DN14865_c0_g1	2148	TRINITY_DN14865_c0_g1_i1;TRINITY_DN14865_c0_g1_i2	hypothetical protein MtrunA17_Chr4g0002911 [Medicago truncatula]	At3g02645	Putative UPF0481 protein At3g02645 OS=Arabidopsis thaliana GN=At3g02645 PE=3 SV=1	GO:0003674(molecular_function);GO:0005886(plasma membrane);GO:0008150(biological_process);GO:0016021(integral component of membrane)	ENOG410YDVR(UPF0481 protein)	-	-	-	-	G7JFR7.1 PF03140.13;DUF247;	244.31	38.99	2.81012	up	7.22314e-14	9.87613e-12	yes
TRINITY_DN18019_c1_g2	2069	TRINITY_DN18019_c1_g2_i1;TRINITY_DN18019_c1_g2_i2	aspartyl protease family protein 2 [Medicago truncatula]	APF2	Aspartyl protease family protein 2 OS=Arabidopsis thaliana GN=APF2 PE=2 SV=1	GO:0004190(aspartic-type endopeptidase activity);GO:0006508(proteolysis);GO:0030163(protein catabolic process)	ENOG410XNV7(aspartic)	NA	NA	NA	NA(NA)	G7KD30.2 PF14543.4;TAXi_N;	18.44	2.45	2.92103	up	7.45274e-14	1.01401e-11	yes
TRINITY_DN3355_c0_g1	373	TRINITY_DN3355_c0_g1_i1	hypothetical protein MTR_3g052520 [Medicago truncatula]	-	-	-	-	-	-	-	-	-	39.96	0.31	6.92569	up	8.54857e-14	1.15744e-11	yes
TRINITY_DN21082_c0_g1	1784	TRINITY_DN21082_c0_g1_i1;TRINITY_DN21082_c0_g1_i2;TRINITY_DN21082_c0_g1_i3;TRINITY_DN21082_c0_g1_i4;TRINITY_DN21082_c0_g1_i5	uncharacterized protein LOC25493971 [Medicago truncatula]	-	-	GO:0003674(molecular_function);GO:0005739(mitochondrion);GO:0008150(biological_process)	ENOG4111ECQ(NA)	-	-	-	-	-	492.15	84.64	2.69884	up	8.74738e-14	1.1786e-11	yes
TRINITY_DN19980_c1_g1	1277	TRINITY_DN19980_c1_g1_i1;TRINITY_DN19980_c1_g1_i10;TRINITY_DN19980_c1_g1_i2;TRINITY_DN19980_c1_g1_i3;TRINITY_DN19980_c1_g1_i4;TRINITY_DN19980_c1_g1_i5;TRINITY_DN19980_c1_g1_i6;TRINITY_DN19980_c1_g1_i7;TRINITY_DN19980_c1_g1_i8;TRINITY_DN19980_c1_g1_i9	uncharacterized protein LOC11435804 [Medicago truncatula]	-	-	GO:0003674(molecular_function);GO:0005886(plasma membrane);GO:0008150(biological_process);GO:0009941(chloroplast envelope);GO:0016021(integral component of membrane)	ENOG410YJNN(Uncharacterized protein family, UPF0114)	-	-	-	-	G7JGC1.1 PF03350.14;UPF0114;	41.74	0.84	5.29076	up	9.42277e-14	1.26104e-11	yes
TRINITY_DN15160_c1_g2	434	TRINITY_DN15160_c1_g2_i1	-	-	-	-	-	-	-	-	-	-	24.11	0	10.4239	up	9.45005e-14	1.26104e-11	yes
TRINITY_DN23594_c0_g2	2800	TRINITY_DN23594_c0_g2_i1;TRINITY_DN23594_c0_g2_i2;TRINITY_DN23594_c0_g2_i3;TRINITY_DN23594_c0_g2_i4	stachyose synthase [Medicago truncatula]	STS1	Stachyose synthase OS=Pisum sativum GN=STS1 PE=1 SV=1	GO:0005737(cytoplasm);GO:0009312(oligosaccharide biosynthetic process);GO:0047268(galactinol-raffinose galactosyltransferase activity)	ENOG410YCZ1(Stachyose)	K06611	stachyose synthetase	EC:2.4.1.67	mtr00052(Galactose metabolism)	A0A072U3J2.1 PF05691.10;Raffinose_syn;	17.52	1.23	4.01757	up	1.1803e-13	1.56451e-11	yes
TRINITY_DN15076_c0_g3	1911	TRINITY_DN15076_c0_g3_i1;TRINITY_DN15076_c0_g3_i2;TRINITY_DN15076_c0_g3_i3;TRINITY_DN15076_c0_g3_i4	abscisate beta-glucosyltransferase-like [Medicago truncatula]	AOG	Abscisate beta-glucosyltransferase OS=Phaseolus angularis GN=AOG PE=1 SV=1	GO:0009813(flavonoid biosynthetic process);GO:0043231(intracellular membrane-bounded organelle);GO:0052696(flavonoid glucuronidation);GO:0080043(quercetin 3-O-glucosyltransferase activity);GO:0080044(quercetin 7-O-glucosyltransferase activity)	COG1819(Transferase)	K14595	abscisate beta-glucosyltransferase	EC:2.4.1.263	mtr00906(Carotenoid biosynthesis)	D7L3M3.1 PF00201.16;UDPGT;	88.06	11.15	3.18654	up	1.1837e-13	1.56451e-11	yes
TRINITY_DN12319_c0_g1	1291	TRINITY_DN12319_c0_g1_i1	mitogen-activated protein kinase kinase kinase 17 [Medicago truncatula]	mkkA	Mitogen-activated protein kinase kinase kinase A OS=Dictyostelium discoideum GN=mkkA PE=1 SV=2	GO:0005737(cytoplasm)	ENOG410XQGS(mitogen-activated protein kinase kinase kinase)	K20716	mitogen-activated protein kinase kinase kinase 17/18	-	mtr04016(MAPK signaling pathway - plant)	A2Q4H0.1 PF00069.23;Pkinase;	55.59	1.9	5.02455	up	1.29961e-13	1.70958e-11	yes
TRINITY_DN19722_c0_g1	1039	TRINITY_DN19722_c0_g1_i1;TRINITY_DN19722_c0_g1_i2	hypothetical protein MtrunA17_Chr1g0209961 [Medicago truncatula]	-	-	GO:0003674(molecular_function);GO:0005634(nucleus);GO:0008150(biological_process)	ENOG410YTUU(NA)	-	-	-	-	-	201.93	37.67	2.59708	up	1.30886e-13	1.71362e-11	yes
TRINITY_DN21588_c0_g2	1227	TRINITY_DN21588_c0_g2_i1	crocetin glucosyltransferase, chloroplastic [Cicer arietinum]	UGT75L6	Crocetin glucosyltransferase, chloroplastic OS=Gardenia jasminoides GN=UGT75L6 PE=1 SV=1	GO:0009813(flavonoid biosynthetic process);GO:0043231(intracellular membrane-bounded organelle);GO:0052696(flavonoid glucuronidation);GO:0080043(quercetin 3-O-glucosyltransferase activity);GO:0080044(quercetin 7-O-glucosyltransferase activity)	COG1819(Transferase)	NA	NA	NA	NA(NA)	I1KS53.1 PF00201.16;UDPGT;	52.43	7.64	2.93391	up	1.37381e-13	1.79021e-11	yes
TRINITY_DN13496_c0_g9	601	TRINITY_DN13496_c0_g9_i1	cytochrome p450, partial [Trifolium pratense]	-	-	-	-	-	-	-	-	A0A072TIS3.1 PF13456.4;RVT_3;	19.3	0.43	5.65515	up	1.55563e-13	2.01767e-11	yes
TRINITY_DN19182_c0_g1	1434	TRINITY_DN19182_c0_g1_i1;TRINITY_DN19182_c0_g1_i2;TRINITY_DN19182_c0_g1_i3	uncharacterized protein LOC25495812 [Medicago truncatula]	CDF3	Cyclic dof factor 3 OS=Arabidopsis thaliana GN=CDF3 PE=1 SV=2	GO:0003677(DNA binding);GO:0003700(DNA binding transcription factor activity);GO:0005515(protein binding);GO:0005634(nucleus);GO:0006351(transcription, DNA-templated);GO:0006355(regulation of transcription, DNA-templated);GO:0009908(flower development);GO:0043565(sequence-specific DNA binding);GO:0046872(metal ion binding);GO:0048510(regulation of timing of transition from vegetative to reproduct…	ENOG410YN7N(zinc finger protein)	K16222	Dof zinc finger protein DOF5.5	-	boe04712(Circadian rhythm - plant)	A0A072U836.1 PF02701.13;zf-Dof;	21.8	2.55	3.1489	up	1.66848e-13	2.15397e-11	yes
TRINITY_DN22824_c0_g1	2931	TRINITY_DN22824_c0_g1_i1;TRINITY_DN22824_c0_g1_i2;TRINITY_DN22824_c0_g1_i3	extra-large guanine nucleotide-binding protein 1 isoform X1 [Medicago truncatula]	XLG1	Extra-large guanine nucleotide-binding protein 1 OS=Arabidopsis thaliana GN=XLG1 PE=1 SV=2	GO:0001664(G-protein coupled receptor binding);GO:0003924(GTPase activity);GO:0005525(GTP binding);GO:0005634(nucleus);GO:0005834(heterotrimeric G-protein complex);GO:0005886(plasma membrane);GO:0007186(G-protein coupled receptor signaling pathway);GO:0007188(adenylate cyclase-modulating G-protein coupled receptor signaling pathway);GO:0009737(response to abscisic acid);GO:0009744(response to suc…	ENOG410XNVQ(Guanine nucleotide binding protein (G protein) alpha)	NA	NA	NA	NA(NA)	A0A072VRL1.1 PF00503.18;G-alpha;	24.97	2.69	3.38415	up	2.12908e-13	2.73587e-11	yes
TRINITY_DN22615_c0_g5	1051	TRINITY_DN22615_c0_g5_i1	RNA-directed DNA polymerase (Reverse transcriptase) [Medicago truncatula]	-	-	-	ENOG410YUPY(Retroelement)	K03283	heat shock 70kDa protein 1/2/6/8	-	han03040(Spliceosome);han04141(Protein processing in endoplasmic reticulum);han04144(Endocytosis)	M1BPI1.1 PF00078.25;RVT_1;	12.7	0.63	4.48327	up	2.29762e-13	2.93884e-11	yes
TRINITY_DN15041_c0_g1	652	TRINITY_DN15041_c0_g1_i1	uncharacterized protein LOC11426540 [Medicago truncatula]	-	-	GO:0003674(molecular_function);GO:0005634(nucleus);GO:0008150(biological_process);GO:0016021(integral component of membrane)	ENOG41114KP(NA)	-	-	-	-	-	70.73	13.02	2.6204	up	2.36848e-13	3.01557e-11	yes
TRINITY_DN17350_c0_g1	1160	TRINITY_DN17350_c0_g1_i1;TRINITY_DN17350_c0_g1_i2;TRINITY_DN17350_c0_g1_i3	carboxymethylenebutenolidase homolog isoform X1 [Medicago truncatula]	Cmbl	Carboxymethylenebutenolidase homolog OS=Mus musculus GN=Cmbl PE=1 SV=1	GO:0003674(molecular_function);GO:0005737(cytoplasm);GO:0008150(biological_process);GO:0016787(hydrolase activity)	COG0412(dienelactone hydrolase)	-	-	-	-	G7IYB3.1 PF01738.16;DLH;	7.91	54.61	-2.74573	down	2.45489e-13	3.11131e-11	yes
TRINITY_DN25903_c1_g1	3032	TRINITY_DN25903_c1_g1_i1;TRINITY_DN25903_c1_g1_i10;TRINITY_DN25903_c1_g1_i2;TRINITY_DN25903_c1_g1_i3;TRINITY_DN25903_c1_g1_i4;TRINITY_DN25903_c1_g1_i5;TRINITY_DN25903_c1_g1_i6;TRINITY_DN25903_c1_g1_i7;TRINITY_DN25903_c1_g1_i8;TRINITY_DN25903_c1_g1_i9	alpha-glucan phosphorylase, H isozyme [Medicago truncatula]	-	Alpha-glucan phosphorylase, H isozyme OS=Vicia faba PE=2 SV=1	GO:0005737(cytoplasm);GO:0005980(glycogen catabolic process);GO:0008184(glycogen phosphorylase activity);GO:0030170(pyridoxal phosphate binding)	COG0058(Phosphorylase is an important allosteric enzyme in carbohydrate metabolism. Enzymes from different sources differ in their regulatory mechanisms and in their natural substrates. However, all known phosphorylases share catalytic and structural properties (By similarity))	K00688	glycogen phosphorylase	EC:2.4.1.1	mtr00500(Starch and sucrose metabolism)	V7BNU4.1 PF00343.18;Phosphorylase;	17.83	134.96	-2.73088	down	2.88157e-13	3.62754e-11	yes
TRINITY_DN19339_c1_g5	746	TRINITY_DN19339_c1_g5_i1;TRINITY_DN19339_c1_g5_i2	uncharacterized protein LOC25501628 [Medicago truncatula]	-	-	GO:0003674(molecular_function);GO:0005739(mitochondrion);GO:0008150(biological_process)	ENOG4111CB0(NA)	NA	NA	NA	NA(NA)	-	72.63	2.6	4.95529	up	2.88834e-13	3.62754e-11	yes
TRINITY_DN21843_c0_g1	1206	TRINITY_DN21843_c0_g1_i1;TRINITY_DN21843_c0_g1_i2;TRINITY_DN21843_c0_g1_i3;TRINITY_DN21843_c0_g1_i4;TRINITY_DN21843_c0_g1_i5;TRINITY_DN21843_c0_g1_i6	guanylate kinase 3, chloroplastic [Medicago truncatula]	GK3	Guanylate kinase 3, chloroplastic OS=Arabidopsis thaliana GN=GK3 PE=2 SV=1	GO:0004385(guanylate kinase activity);GO:0005524(ATP binding);GO:0009507(chloroplast);GO:0016310(phosphorylation);GO:0048638(regulation of developmental growth)	COG0194(Essential for recycling GMP and indirectly, cGMP (By similarity))	K00942	guanylate kinase	EC:2.7.4.8	mtr00230(Purine metabolism)	A0A072V3Y8.1 PF00625.19;Guanylate_kin;	51.81	9.64	2.60354	up	2.91463e-13	3.64407e-11	yes
TRINITY_DN16658_c0_g1	1687	TRINITY_DN16658_c0_g1_i1;TRINITY_DN16658_c0_g1_i2;TRINITY_DN16658_c0_g1_i3;TRINITY_DN16658_c0_g1_i4;TRINITY_DN16658_c0_g1_i5;TRINITY_DN16658_c0_g1_i6;TRINITY_DN16658_c0_g1_i7;TRINITY_DN16658_c0_g1_i8;TRINITY_DN16658_c0_g1_i9	bifunctional nuclease 1 [Medicago truncatula]	BBD1	Bifunctional nuclease 1 OS=Arabidopsis thaliana GN=BBD1 PE=2 SV=1	GO:0004518(nuclease activity);GO:0005634(nucleus);GO:0031063(regulation of histone deacetylation);GO:0043565(sequence-specific DNA binding);GO:0045892(negative regulation of transcription, DNA-templated);GO:0050832(defense response to fungus)	ENOG4110AP6(Bifunctional nuclease with both RNase and DNase activites. Involved in basal defense response. Participates in abscisic acid-derived callose deposition following infection by a necrotrophic pathogen)	NA	NA	NA	NA(NA)	M4CVE4.1 PF02577.12;DNase-RNase;	43.86	354.28	-2.83045	down	3.09251e-13	3.84913e-11	yes
TRINITY_DN24958_c1_g3	753	TRINITY_DN24958_c1_g3_i1	hypothetical protein MtrunA17_Chr4g0075561 [Medicago truncatula]	-	-	GO:0003674(molecular_function);GO:0008150(biological_process)	ENOG410ZMJN(NA)	-	-	-	-	-	40.06	3.71	3.63428	up	3.18714e-13	3.94921e-11	yes
TRINITY_DN18578_c0_g8	1064	TRINITY_DN18578_c0_g8_i1;TRINITY_DN18578_c0_g8_i2;TRINITY_DN18578_c0_g8_i3	copia-type polyprotein, partial [Trifolium pratense]	-	-	GO:0004674(protein serine/threonine kinase activity);GO:0005886(plasma membrane);GO:0006468(protein phosphorylation);GO:0006952(defense response);GO:0009506(plasmodesma)	ENOG410ZXEB(Integrase core domain)	NA	NA	NA	NA(NA)	M5W8K4.1 PF14223.4;Retrotran_gag_2;	18.11	0.5	5.43301	up	3.33582e-13	4.10118e-11	yes
TRINITY_DN17754_c1_g1	584	TRINITY_DN17754_c1_g1_i1;TRINITY_DN17754_c1_g1_i2;TRINITY_DN17754_c1_g1_i3;TRINITY_DN17754_c1_g1_i4;TRINITY_DN17754_c1_g1_i5;TRINITY_DN17754_c1_g1_i6;TRINITY_DN17754_c1_g1_i7	Glycine-rich RNA-binding protein GRP1A isoform B [Glycine soja]	-	Glycine-rich RNA-binding protein OS=Daucus carota PE=2 SV=1	GO:0000380(alternative mRNA splicing, via spliceosome);GO:0003690(double-stranded DNA binding);GO:0003697(single-stranded DNA binding);GO:0003723(RNA binding);GO:0003729(mRNA binding);GO:0005515(protein binding);GO:0005634(nucleus);GO:0005737(cytoplasm);GO:0005739(mitochondrion);GO:0005777(peroxisome);GO:0005829(cytosol);GO:0006406(mRNA export from nucleus);GO:0006970(response to osmotic stress);…	COG0724(Rna-binding protein)	NA	NA	NA	NA(NA)	G7JHA8.1 PF00076.20;RRM_1;	50.65	359.7	-2.54449	down	3.33934e-13	4.10118e-11	yes
TRINITY_DN16673_c1_g6	415	TRINITY_DN16673_c1_g6_i1	-	-	-	-	-	-	-	-	-	-	19.52	0	10.067	up	3.42721e-13	4.19056e-11	yes
TRINITY_DN15677_c0_g1	1667	TRINITY_DN15677_c0_g1_i1;TRINITY_DN15677_c0_g1_i2;TRINITY_DN15677_c0_g1_i3;TRINITY_DN15677_c0_g1_i4;TRINITY_DN15677_c0_g1_i5	12-oxophytodienoate reductase 3 [Medicago truncatula]	OPR3	12-oxophytodienoate reductase 3 OS=Solanum lycopersicum GN=OPR3 PE=1 SV=1	GO:0003959(NADPH dehydrogenase activity);GO:0005777(peroxisome);GO:0009695(jasmonic acid biosynthetic process);GO:0016629(12-oxophytodienoate reductase activity);GO:0031408(oxylipin biosynthetic process)	COG1902(NADH flavin oxidoreductase, NADH oxidase)	K05894	12-oxophytodienoic acid reductase	EC:1.3.1.42	mtr00592(alpha-Linolenic acid metabolism)	A0A072UTR0.1 PF00724.18;Oxidored_FMN;	45.01	4.88	3.31228	up	3.62018e-13	4.40709e-11	yes
TRINITY_DN16444_c0_g7	697	TRINITY_DN16444_c0_g7_i1;TRINITY_DN16444_c0_g7_i2	crocetin glucosyltransferase, chloroplastic [Medicago truncatula]	UGT75L6	Crocetin glucosyltransferase, chloroplastic OS=Gardenia jasminoides GN=UGT75L6 PE=1 SV=1	GO:0009813(flavonoid biosynthetic process);GO:0043231(intracellular membrane-bounded organelle);GO:0052696(flavonoid glucuronidation);GO:0080043(quercetin 3-O-glucosyltransferase activity);GO:0080044(quercetin 7-O-glucosyltransferase activity)	COG1819(Transferase)	NA	NA	NA	NA(NA)	G7LH44.1 PF00201.16;UDPGT;	56.26	7.17	3.13963	up	3.64978e-13	4.42372e-11	yes
TRINITY_DN21971_c0_g1	1613	TRINITY_DN21971_c0_g1_i1;TRINITY_DN21971_c0_g1_i2;TRINITY_DN21971_c0_g1_i3;TRINITY_DN21971_c0_g1_i4	galactinol-raffinose galactosyltransferase [Medicago truncatula]	RFS1	Probable galactinol--sucrose galactosyltransferase 1 OS=Arabidopsis thaliana GN=RFS1 PE=2 SV=1	GO:0003676(nucleic acid binding);GO:0004553(hydrolase activity, hydrolyzing O-glycosyl compounds);GO:0004857(enzyme inhibitor activity);GO:0005737(cytoplasm);GO:0005975(carbohydrate metabolic process);GO:0046872(metal ion binding);GO:0047274(galactinol-sucrose galactosyltransferase activity)	ENOG410YBU9(raffinose synthase)	K06617	raffinose synthase	EC:2.4.1.82	mtr00052(Galactose metabolism)	G7K4U7.2 PF05691.10;Raffinose_syn;	2.92	30.48	-3.21982	down	3.68345e-13	4.44512e-11	yes
TRINITY_DN14967_c0_g1	2431	TRINITY_DN14967_c0_g1_i1;TRINITY_DN14967_c0_g1_i2;TRINITY_DN14967_c0_g1_i3;TRINITY_DN14967_c0_g1_i4;TRINITY_DN14967_c0_g1_i5;TRINITY_DN14967_c0_g1_i6;TRINITY_DN14967_c0_g1_i7;TRINITY_DN14967_c0_g1_i8;TRINITY_DN14967_c0_g1_i9	ninja-family protein AFP1 [Medicago truncatula]	AFP3	Ninja-family protein AFP3 OS=Arabidopsis thaliana GN=AFP3 PE=1 SV=1	GO:0005515(protein binding);GO:0005634(nucleus);GO:0007165(signal transduction)	ENOG410YGKS(ninja-family protein)	K05747	Wiskott-Aldrich syndrome protein	-	vvi04144(Endocytosis)	V7C5N8.1 PF16135.3;Jas;	43.52	4.39	3.33263	up	4.06442e-13	4.87846e-11	yes
TRINITY_DN18670_c0_g1	1099	TRINITY_DN18670_c0_g1_i1;TRINITY_DN18670_c0_g1_i2;TRINITY_DN18670_c0_g1_i3;TRINITY_DN18670_c0_g1_i4	protein EARLY RESPONSIVE TO DEHYDRATION 15 [Medicago truncatula]	ERD15	Protein EARLY RESPONSIVE TO DEHYDRATION 15 OS=Arabidopsis thaliana GN=ERD15 PE=1 SV=1	GO:0005515(protein binding);GO:0005737(cytoplasm);GO:0009414(response to water deprivation);GO:0009617(response to bacterium);GO:0009644(response to high light intensity)	ENOG410Z9AB(Polyadenylate-binding protein-interacting protein)	-	-	-	-	-	13.18	97.51	-2.68934	down	4.07769e-13	4.87846e-11	yes
TRINITY_DN16144_c1_g4	910	TRINITY_DN16144_c1_g4_i1	hypothetical protein TSUD_201850 [Trifolium subterraneum]	HSP70	Heat shock 70 kDa protein OS=Glycine max GN=HSP70 PE=3 SV=1	GO:0005515(protein binding);GO:0005524(ATP binding);GO:0005618(cell wall);GO:0005634(nucleus);GO:0005794(Golgi apparatus);GO:0005829(cytosol);GO:0005886(plasma membrane);GO:0006351(transcription, DNA-templated);GO:0006355(regulation of transcription, DNA-templated);GO:0006457(protein folding);GO:0009408(response to heat);GO:0009615(response to virus);GO:0009617(response to bacterium);GO:0034620(c…	COG0443(Heat shock protein)	K03283	heat shock 70kDa protein 1/2/6/8	-	mtr03040(Spliceosome);mtr04141(Protein processing in endoplasmic reticulum);mtr04144(Endocytosis)	F6HYK6.1 PF00012.18;HSP70;	45.83	6.04	3.08504	up	4.31909e-13	5.1451e-11	yes
TRINITY_DN16907_c1_g1	688	TRINITY_DN16907_c1_g1_i1;TRINITY_DN16907_c1_g1_i2;TRINITY_DN16907_c1_g1_i3;TRINITY_DN16907_c1_g1_i4;TRINITY_DN16907_c1_g1_i5;TRINITY_DN16907_c1_g1_i6;TRINITY_DN16907_c1_g1_i7	heavy metal-associated isoprenylated plant protein 39 [Medicago truncatula]	HIPP12	Heavy metal-associated isoprenylated plant protein 12 OS=Arabidopsis thaliana GN=HIPP12 PE=3 SV=1	GO:0005737(cytoplasm);GO:0030001(metal ion transport);GO:0046914(transition metal ion binding);GO:0046916(cellular transition metal ion homeostasis)	COG2608(heavy metal transport detoxification protein)	-	-	-	-	C6T0E9.1 PF00403.24;HMA;	86.28	7.13	3.73435	up	4.52366e-13	5.36575e-11	yes
TRINITY_DN19039_c0_g1	911	TRINITY_DN19039_c0_g1_i1;TRINITY_DN19039_c0_g1_i2;TRINITY_DN19039_c0_g1_i3;TRINITY_DN19039_c0_g1_i4;TRINITY_DN19039_c0_g1_i5;TRINITY_DN19039_c0_g1_i6	RING-H2 finger protein ATL8 [Medicago truncatula]	ATL8	RING-H2 finger protein ATL8 OS=Arabidopsis thaliana GN=ATL8 PE=2 SV=2	GO:0005634(nucleus);GO:0008270(zinc ion binding);GO:0016021(integral component of membrane);GO:0016567(protein ubiquitination);GO:0043161(proteasome-mediated ubiquitin-dependent protein catabolic process);GO:0046872(metal ion binding);GO:0061630(ubiquitin protein ligase activity)	ENOG41121N2(zinc ion binding)	NA	NA	NA	NA(NA)	G7K2K6.1 PF13639.4;zf-RING_2;	5.05	56.72	-3.41806	down	5.43459e-13	6.41882e-11	yes
TRINITY_DN20351_c0_g1	2244	TRINITY_DN20351_c0_g1_i1;TRINITY_DN20351_c0_g1_i10;TRINITY_DN20351_c0_g1_i11;TRINITY_DN20351_c0_g1_i12;TRINITY_DN20351_c0_g1_i13;TRINITY_DN20351_c0_g1_i14;TRINITY_DN20351_c0_g1_i15;TRINITY_DN20351_c0_g1_i16;TRINITY_DN20351_c0_g1_i17;TRINITY_DN20351_c0_g1_i2;TRINITY_DN20351_c0_g1_i3;TRINITY_DN20351_c0_g1_i4;TRINITY_DN20351_c0_g1_i5;TRINITY_DN20351_c0_g1_i6;TRINITY_DN20351_c0_g1_i7;TRINITY_DN20351_…	protein REVEILLE 8 isoform X1 [Medicago truncatula]	-	-	-	COG5269(Transcription factor)	-	-	-	-	-	194.15	32.36	2.81556	up	5.52049e-13	6.49266e-11	yes
TRINITY_DN22143_c0_g2	907	TRINITY_DN22143_c0_g2_i1	hypothetical protein TSUD_63050 [Trifolium subterraneum]	SAUR50	Auxin-responsive protein SAUR50 OS=Arabidopsis thaliana GN=SAUR50 PE=1 SV=1	GO:0003674(molecular_function);GO:0005739(mitochondrion);GO:0009733(response to auxin);GO:0009734(auxin-activated signaling pathway);GO:0040008(regulation of growth)	ENOG410Z28U(auxin-induced protein)	K14488	SAUR family protein	-	mtr04075(Plant hormone signal transduction)	B7FN03.1 PF02519.12;Auxin_inducible;	0.34	18.36	-5.51658	down	5.60218e-13	6.56093e-11	yes
TRINITY_DN18771_c0_g1	1660	TRINITY_DN18771_c0_g1_i1;TRINITY_DN18771_c0_g1_i10;TRINITY_DN18771_c0_g1_i2;TRINITY_DN18771_c0_g1_i3;TRINITY_DN18771_c0_g1_i4;TRINITY_DN18771_c0_g1_i5;TRINITY_DN18771_c0_g1_i6;TRINITY_DN18771_c0_g1_i7;TRINITY_DN18771_c0_g1_i8;TRINITY_DN18771_c0_g1_i9	putative nematode resistance protein-like HSPRO1 [Medicago truncatula]	HSPRO2	Nematode resistance protein-like HSPRO2 OS=Arabidopsis thaliana GN=HSPRO2 PE=1 SV=1	GO:0005515(protein binding);GO:0005737(cytoplasm);GO:0005739(mitochondrion);GO:0006979(response to oxidative stress);GO:0009751(response to salicylic acid);GO:0009816(defense response to bacterium, incompatible interaction);GO:0019441(tryptophan catabolic process to kynurenine);GO:0020037(heme binding);GO:0046872(metal ion binding)	ENOG410YA6B(arabidopsis ortholog of sugar beet hs1 pro-1 2)	-	-	-	-	G7JB65.1 PF07014.10;Hs1pro-1_C;	158.99	16.91	3.16301	up	5.68256e-13	6.6271e-11	yes
TRINITY_DN25682_c0_g1	2034	TRINITY_DN25682_c0_g1_i1;TRINITY_DN25682_c0_g1_i2;TRINITY_DN25682_c0_g1_i3;TRINITY_DN25682_c0_g1_i4;TRINITY_DN25682_c0_g1_i5;TRINITY_DN25682_c0_g1_i6;TRINITY_DN25682_c0_g1_i7	uncharacterized protein LOC25502061 [Medicago truncatula]	At1g76660	Uncharacterized protein At1g76660 OS=Arabidopsis thaliana GN=At1g76660 PE=2 SV=1	GO:0003674(molecular_function);GO:0005634(nucleus);GO:0008150(biological_process)	ENOG410YEXH(Hydroxyproline-rich glycoprotein family protein)	-	-	-	-	A0A061G123.1 PF03600.14;CitMHS;	74.06	16.26	2.3497	up	6.01455e-13	6.98493e-11	yes
TRINITY_DN15779_c0_g2	1501	TRINITY_DN15779_c0_g2_i1;TRINITY_DN15779_c0_g2_i2;TRINITY_DN15779_c0_g2_i3;TRINITY_DN15779_c0_g2_i4;TRINITY_DN15779_c0_g2_i5	E3 ubiquitin-protein ligase ATL6 [Medicago truncatula]	ATL6	E3 ubiquitin-protein ligase ATL6 OS=Arabidopsis thaliana GN=ATL6 PE=1 SV=2	GO:0004842(ubiquitin-protein transferase activity);GO:0005576(extracellular region);GO:0005886(plasma membrane);GO:0008270(zinc ion binding);GO:0009814(defense response, incompatible interaction);GO:0009816(defense response to bacterium, incompatible interaction);GO:0010200(response to chitin);GO:0016021(integral component of membrane);GO:0016567(protein ubiquitination);GO:0043161(proteasome-medi…	ENOG41121N2(zinc ion binding)	NA	NA	NA	NA(NA)	I1JRE8.2 PF13639.4;zf-RING_2;	61.12	9.58	2.84787	up	8.65579e-13	1.00104e-10	yes
TRINITY_DN15183_c0_g1	1175	TRINITY_DN15183_c0_g1_i1;TRINITY_DN15183_c0_g1_i2;TRINITY_DN15183_c0_g1_i3;TRINITY_DN15183_c0_g1_i4;TRINITY_DN15183_c0_g1_i5	bet1-like protein At4g14600 [Medicago truncatula]	At4g14600	Bet1-like protein At4g14600 OS=Arabidopsis thaliana GN=At4g14600 PE=2 SV=1	GO:0000139(Golgi membrane);GO:0003674(molecular_function);GO:0005789(endoplasmic reticulum membrane);GO:0005794(Golgi apparatus);GO:0005886(plasma membrane);GO:0015031(protein transport);GO:0016021(integral component of membrane);GO:0016192(vesicle-mediated transport)	ENOG410XT49(mitochondrial transcription termination)	K08505	protein transport protein SFT1	-	mtr04130(SNARE interactions in vesicular transport)	-	77.71	13.86	2.611	up	9.22895e-13	1.0629e-10	yes
TRINITY_DN15041_c0_g2	444	TRINITY_DN15041_c0_g2_i1	uncharacterized protein LOC11426540 [Medicago truncatula]	-	-	GO:0003674(molecular_function);GO:0005634(nucleus);GO:0008150(biological_process);GO:0016021(integral component of membrane)	ENOG41114KP(NA)	-	-	-	-	-	79.04	11.41	2.98847	up	9.44886e-13	1.08373e-10	yes
TRINITY_DN17411_c1_g4	1229	TRINITY_DN17411_c1_g4_i1;TRINITY_DN17411_c1_g4_i2;TRINITY_DN17411_c1_g4_i3;TRINITY_DN17411_c1_g4_i4;TRINITY_DN17411_c1_g4_i5	uncharacterized protein LOC11433254 [Medicago truncatula]	-	-	-	ENOG410Y7TC(NA)	-	-	-	-	-	167.42	39.31	2.38383	up	1.0216e-12	1.1669e-10	yes
TRINITY_DN15264_c1_g1	3404	TRINITY_DN15264_c1_g1_i1	protein ENHANCED DISEASE RESISTANCE 4 [Medicago truncatula]	EDR4	Protein ENHANCED DISEASE RESISTANCE 4 OS=Arabidopsis thaliana GN=EDR4 PE=1 SV=1	GO:0005515(protein binding);GO:0005634(nucleus);GO:0005768(endosome);GO:0005886(plasma membrane);GO:0006897(endocytosis);GO:0006952(defense response);GO:0009620(response to fungus);GO:0009863(salicylic acid mediated signaling pathway);GO:0030100(regulation of endocytosis);GO:1900150(regulation of defense response to fungus)	ENOG410YZZS(Protein of unknown function (DUF3133))	-	-	-	-	A0A072VBG6.1 PF11331.6;zinc_ribbon_12;	12.8	2.01	2.86723	up	1.07148e-12	1.21486e-10	yes
TRINITY_DN17725_c0_g1	2511	TRINITY_DN17725_c0_g1_i1;TRINITY_DN17725_c0_g1_i2;TRINITY_DN17725_c0_g1_i3;TRINITY_DN17725_c0_g1_i4	TPR repeat thioredoxin TTL1-like protein [Medicago truncatula]	TTL2	TPR repeat-containing thioredoxin TTL2 OS=Arabidopsis thaliana GN=TTL2 PE=2 SV=2	GO:0005739(mitochondrion)	ENOG410XSU5(TPR repeat-containing thioredoxin TTL1-like)	NA	NA	NA	NA(NA)	V7ARF4.1 PF13432.4;TPR_16;	67.48	8.06	3.18915	up	1.07234e-12	1.21486e-10	yes
TRINITY_DN22150_c0_g6	1890	TRINITY_DN22150_c0_g6_i1;TRINITY_DN22150_c0_g6_i2	cytochrome P450 94C1 [Medicago truncatula]	CYP94C1	Cytochrome P450 94C1 OS=Arabidopsis thaliana GN=CYP94C1 PE=2 SV=1	GO:0000398(mRNA splicing, via spliceosome);GO:0005681(spliceosomal complex)	COG2124(Cytochrome p450)	NA	NA	NA	NA(NA)	A0A072VKA5.1 PF00067.20;p450;	12.13	1.06	3.66795	up	1.11963e-12	1.26327e-10	yes
TRINITY_DN21230_c0_g2	2396	TRINITY_DN21230_c0_g2_i1;TRINITY_DN21230_c0_g2_i2;TRINITY_DN21230_c0_g2_i3;TRINITY_DN21230_c0_g2_i4;TRINITY_DN21230_c0_g2_i5;TRINITY_DN21230_c0_g2_i6;TRINITY_DN21230_c0_g2_i7	protein WVD2-like 1 isoform X1 [Medicago truncatula]	WDL3	Protein WVD2-like 3 OS=Arabidopsis thaliana GN=WDL3 PE=1 SV=1	GO:0005515(protein binding);GO:0005634(nucleus);GO:0008017(microtubule binding);GO:0043622(cortical microtubule organization);GO:0051511(negative regulation of unidimensional cell growth)	ENOG4111824(Targeting protein for Xklp2 (TPX2))	NA	NA	NA	NA(NA)	A0A072U493.1 PF06886.9;TPX2;	85.61	14.02	2.37673	up	1.27791e-12	1.43602e-10	yes
TRINITY_DN23342_c0_g1	3389	TRINITY_DN23342_c0_g1_i1;TRINITY_DN23342_c0_g1_i10;TRINITY_DN23342_c0_g1_i2;TRINITY_DN23342_c0_g1_i3;TRINITY_DN23342_c0_g1_i4;TRINITY_DN23342_c0_g1_i5;TRINITY_DN23342_c0_g1_i6;TRINITY_DN23342_c0_g1_i7;TRINITY_DN23342_c0_g1_i8;TRINITY_DN23342_c0_g1_i9	BTB/POZ domain-containing protein At2g30600 [Medicago truncatula]	At2g30600/At2g30610	BTB/POZ domain-containing protein At2g30600 OS=Arabidopsis thaliana GN=At2g30600/At2g30610 PE=2 SV=1	GO:0004842(ubiquitin-protein transferase activity);GO:0007420(brain development);GO:0015629(actin cytoskeleton);GO:0030036(actin cytoskeleton organization);GO:0031463(Cul3-RING ubiquitin ligase complex);GO:0032839(dendrite cytoplasm);GO:0051015(actin filament binding)	COG5021(ubiquitin protein ligase)	NA	NA	NA	NA(NA)	G7JYH5.2 PF00754.23;F5_F8_type_C;	7.83	52.03	-2.50484	down	1.44994e-12	1.62276e-10	yes
TRINITY_DN20934_c0_g2	833	TRINITY_DN20934_c0_g2_i1;TRINITY_DN20934_c0_g2_i2	putative transcription factor bHLH family [Medicago truncatula]	AIB	Transcription factor ABA-INDUCIBLE bHLH-TYPE OS=Arabidopsis thaliana GN=AIB PE=2 SV=2	GO:0003677(DNA binding);GO:0003700(DNA binding transcription factor activity);GO:0005515(protein binding);GO:0005634(nucleus);GO:0006351(transcription, DNA-templated);GO:0006355(regulation of transcription, DNA-templated);GO:0009611(response to wounding);GO:0009737(response to abscisic acid);GO:0009738(abscisic acid-activated signaling pathway);GO:0010629(negative regulation of gene expression);G…	ENOG410YCJJ(anthocyanin-containing compound biosynthetic process)	K13422	transcription factor MYC2	-	vvi04016(MAPK signaling pathway - plant);vvi04075(Plant hormone signal transduction)	B9SBG3.1 PF00010.24;HLH;	85.09	7.54	3.65469	up	1.46714e-12	1.63463e-10	yes
TRINITY_DN22788_c0_g3	2149	TRINITY_DN22788_c0_g3_i1;TRINITY_DN22788_c0_g3_i2;TRINITY_DN22788_c0_g3_i3;TRINITY_DN22788_c0_g3_i4;TRINITY_DN22788_c0_g3_i5;TRINITY_DN22788_c0_g3_i6	geraniol 8-hydroxylase [Medicago truncatula]	CYP75B2	Flavonoid 3'-monooxygenase OS=Petunia hybrida GN=CYP75B2 PE=2 SV=1	GO:0016020(membrane);GO:0016709(oxidoreductase activity, acting on paired donors, with incorporation or reduction of molecular oxygen, NAD(P)H as one donor, and incorporation of one atom of oxygen);GO:0044550(secondary metabolite biosynthetic process)	COG2124(Cytochrome p450)	NA	NA	NA	NA(NA)	A0A072UQP0.1 PF00067.20;p450;	9.07	58.89	-2.52349	down	1.47232e-12	1.63463e-10	yes
TRINITY_DN15422_c0_g1	910	TRINITY_DN15422_c0_g1_i1;TRINITY_DN15422_c0_g1_i2	uncharacterized protein LOC11406346 [Medicago truncatula]	-	-	GO:0003674(molecular_function);GO:0005634(nucleus);GO:0008150(biological_process)	ENOG41114DH(Protein of unknown function (DUF1645))	-	-	-	-	G7K1D1.1 PF07816.9;DUF1645;	36.66	5.96	2.79587	up	1.53528e-12	1.69774e-10	yes
TRINITY_DN23716_c0_g3	1105	TRINITY_DN23716_c0_g3_i1;TRINITY_DN23716_c0_g3_i2;TRINITY_DN23716_c0_g3_i3;TRINITY_DN23716_c0_g3_i4	probable galactinol--sucrose galactosyltransferase 1 [Medicago truncatula]	RFS1	Probable galactinol--sucrose galactosyltransferase 1 OS=Arabidopsis thaliana GN=RFS1 PE=2 SV=1	GO:0003676(nucleic acid binding);GO:0004553(hydrolase activity, hydrolyzing O-glycosyl compounds);GO:0004857(enzyme inhibitor activity);GO:0005737(cytoplasm);GO:0005975(carbohydrate metabolic process);GO:0046872(metal ion binding);GO:0047274(galactinol-sucrose galactosyltransferase activity)	ENOG410YBU9(raffinose synthase)	K06617	raffinose synthase	EC:2.4.1.82	mtr00052(Galactose metabolism)	U5FXC3.1 PF05691.10;Raffinose_syn;	2.99	30.01	-3.22862	down	1.57675e-12	1.73667e-10	yes
TRINITY_DN20185_c0_g1	1450	TRINITY_DN20185_c0_g1_i1;TRINITY_DN20185_c0_g1_i2;TRINITY_DN20185_c0_g1_i3;TRINITY_DN20185_c0_g1_i4	U-box domain-containing protein 1 [Medicago truncatula]	-	-	GO:0005634(nucleus);GO:0005737(cytoplasm)	ENOG410XRTN(U-box domain-containing protein)	K14431	transcription factor TGA	-	aly04075(Plant hormone signal transduction)	V7AJH7.1 PF00514.21;Arm;	37.76	7.66	2.45848	up	1.59096e-12	1.7454e-10	yes
TRINITY_DN20662_c1_g2	844	TRINITY_DN20662_c1_g2_i1;TRINITY_DN20662_c1_g2_i2;TRINITY_DN20662_c1_g2_i3	hypothetical protein MtrunA17_Chr7g0237681 [Medicago truncatula]	-	-	-	-	-	-	-	-	-	12.08	0.12	6.67788	up	1.66223e-12	1.81641e-10	yes
TRINITY_DN18964_c1_g2	2329	TRINITY_DN18964_c1_g2_i1;TRINITY_DN18964_c1_g2_i2;TRINITY_DN18964_c1_g2_i3;TRINITY_DN18964_c1_g2_i4;TRINITY_DN18964_c1_g2_i5;TRINITY_DN18964_c1_g2_i6;TRINITY_DN18964_c1_g2_i7	protein CYPRO4 [Medicago truncatula]	CYPRO4	Protein CYPRO4 OS=Cynara cardunculus GN=CYPRO4 PE=2 SV=1	GO:0003674(molecular_function);GO:0005737(cytoplasm)	COG5167(vacuolar import and degradation protein)	-	-	-	-	G7JL95.1 PF08553.8;VID27;	109.86	18.16	2.71916	up	1.7942e-12	1.95293e-10	yes
TRINITY_DN16559_c0_g4	420	TRINITY_DN16559_c0_g4_i1;TRINITY_DN16559_c0_g4_i2	jasmonate zim-domain protein [Medicago truncatula]	-	-	-	-	K13464	jasmonate ZIM domain-containing protein	-	mtr04075(Plant hormone signal transduction)	-	43.69	1.24	5.34595	up	1.87153e-12	2.02915e-10	yes
TRINITY_DN23929_c0_g1	833	TRINITY_DN23929_c0_g1_i1;TRINITY_DN23929_c0_g1_i10;TRINITY_DN23929_c0_g1_i11;TRINITY_DN23929_c0_g1_i2;TRINITY_DN23929_c0_g1_i3;TRINITY_DN23929_c0_g1_i4;TRINITY_DN23929_c0_g1_i5;TRINITY_DN23929_c0_g1_i6;TRINITY_DN23929_c0_g1_i7;TRINITY_DN23929_c0_g1_i8;TRINITY_DN23929_c0_g1_i9	early light inducible protein [Medicago sativa]	-	Early light-induced protein, chloroplastic OS=Pisum sativum PE=2 SV=1	GO:0009409(response to cold);GO:0009507(chloroplast);GO:0009522(photosystem I);GO:0009523(photosystem II);GO:0009535(chloroplast thylakoid membrane);GO:0010030(positive regulation of seed germination);GO:0010117(photoprotection);GO:0010380(regulation of chlorophyll biosynthetic process);GO:0015979(photosynthesis);GO:0016021(integral component of membrane);GO:0016168(chlorophyll binding);GO:003460…	ENOG410Y0RG(early light-induced protein)	NA	NA	NA	NA(NA)	V7BCL3.1 PF00504.19;Chloroa_b-bind;	1489.62	113.61	3.98092	up	1.91694e-12	2.0703e-10	yes
TRINITY_DN17111_c0_g3	1441	TRINITY_DN17111_c0_g3_i1;TRINITY_DN17111_c0_g3_i2	phytoene synthase [Medicago sativa]	PSY	Phytoene synthase, chloroplastic OS=Daucus carota GN=PSY PE=2 SV=1	GO:0009575(chromoplast stroma);GO:0016117(carotenoid biosynthetic process);GO:0016767(geranylgeranyl-diphosphate geranylgeranyltransferase activity)	COG1562(phytoene synthase)	K02291	15-cis-phytoene synthase	EC:2.5.1.32	mtr00906(Carotenoid biosynthesis)	G7K397.2 PF00494.17;SQS_PSY;	97.91	16.58	2.74981	up	2.01168e-12	2.16419e-10	yes
TRINITY_DN17995_c0_g1	1951	TRINITY_DN17995_c0_g1_i1;TRINITY_DN17995_c0_g1_i2	F-box protein SKIP2 [Medicago truncatula]	SKIP2	F-box protein SKIP2 OS=Arabidopsis thaliana GN=SKIP2 PE=1 SV=1	GO:0004842(ubiquitin-protein transferase activity);GO:0005515(protein binding);GO:0005634(nucleus);GO:0005737(cytoplasm);GO:0016567(protein ubiquitination)	ENOG410XQ54(F-box and leucine-rich repeat protein)	NA	NA	NA	NA(NA)	A0A072V054.1 PF12937.5;F-box-like;	34.78	7.42	2.41151	up	2.12716e-12	2.27959e-10	yes
TRINITY_DN12409_c0_g1	531	TRINITY_DN12409_c0_g1_i1	unknown [Medicago truncatula]	-	-	GO:0003674(molecular_function);GO:0005739(mitochondrion);GO:0048367(shoot system development)	ENOG410ZD85(DVL family)	-	-	-	-	-	52.66	2.93	4.3585	up	2.33132e-12	2.48371e-10	yes
TRINITY_DN25267_c0_g1	3376	TRINITY_DN25267_c0_g1_i1	uncharacterized protein LOC112419312 [Medicago truncatula]	pol	Retrovirus-related Pol polyprotein from type-2 retrotransposable element R2DM OS=Drosophila melanogaster GN=pol PE=3 SV=1	GO:0003964(RNA-directed DNA polymerase activity)	ENOG4111MK6(Retrotransposon protein)	NA	NA	NA	NA(NA)	A0A087GPJ8.1 PF00078.25;RVT_1;	5.23	0.31	4.21026	up	2.33553e-12	2.48371e-10	yes
TRINITY_DN23797_c0_g3	1285	TRINITY_DN23797_c0_g3_i1;TRINITY_DN23797_c0_g3_i2	probable CCR4-associated factor 1 homolog 7 [Medicago truncatula]	CAF1-7	Probable CCR4-associated factor 1 homolog 7 OS=Arabidopsis thaliana GN=CAF1-7 PE=2 SV=2	GO:0000175(3'-5'-exoribonuclease activity);GO:0000288(nuclear-transcribed mRNA catabolic process, deadenylation-dependent decay);GO:0030014(CCR4-NOT complex)	COG5228(Ccr4-not transcription complex, subunit)	K12581	CCR4-NOT transcription complex subunit 7/8	-	cam03018(RNA degradation)	W9QXY1.1 PF04857.18;CAF1;	115.33	25.36	2.35826	up	2.54665e-12	2.6979e-10	yes
TRINITY_DN19813_c1_g2	918	TRINITY_DN19813_c1_g2_i1	dehydration-responsive element-binding protein 1A [Medicago truncatula]	DREB1D	Dehydration-responsive element-binding protein 1D OS=Arabidopsis thaliana GN=DREB1D PE=2 SV=1	GO:0003677(DNA binding);GO:0003700(DNA binding transcription factor activity);GO:0005634(nucleus);GO:0006351(transcription, DNA-templated);GO:0006355(regulation of transcription, DNA-templated);GO:0009738(abscisic acid-activated signaling pathway);GO:0019760(glucosinolate metabolic process);GO:0043565(sequence-specific DNA binding)	ENOG410YK37(dehydration-responsive element-binding protein)	NA	NA	NA	NA(NA)	A0A059CHG4.1 PF00847.18;AP2;	9.48	0.25	5.37218	up	2.56484e-12	2.70683e-10	yes
TRINITY_DN15387_c0_g6	1539	TRINITY_DN15387_c0_g6_i1;TRINITY_DN15387_c0_g6_i2	uncharacterized protein LOC11415785 [Medicago truncatula]	-	-	GO:0008375(acetylglucosaminyltransferase activity);GO:0016021(integral component of membrane);GO:0016757(transferase activity, transferring glycosyl groups)	ENOG410YEMA(Core-2/I-Branching enzyme)	-	-	-	-	G7JZH3.1 PF02485.19;Branch;	41.14	4.44	3.62272	up	2.71283e-12	2.85218e-10	yes
TRINITY_DN20410_c3_g1	788	TRINITY_DN20410_c3_g1_i1;TRINITY_DN20410_c3_g1_i10;TRINITY_DN20410_c3_g1_i11;TRINITY_DN20410_c3_g1_i12;TRINITY_DN20410_c3_g1_i13;TRINITY_DN20410_c3_g1_i2;TRINITY_DN20410_c3_g1_i3;TRINITY_DN20410_c3_g1_i4;TRINITY_DN20410_c3_g1_i5;TRINITY_DN20410_c3_g1_i6;TRINITY_DN20410_c3_g1_i7;TRINITY_DN20410_c3_g1_i8;TRINITY_DN20410_c3_g1_i9	uncharacterized protein LOC25490029 [Medicago truncatula]	-	-	GO:0009507(chloroplast)	ENOG411135V(NA)	-	-	-	-	-	3.34	38.05	-3.24125	down	2.88026e-12	3.01677e-10	yes
TRINITY_DN19610_c0_g2	1345	TRINITY_DN19610_c0_g2_i1;TRINITY_DN19610_c0_g2_i2	light-inducible protein CPRF2 [Medicago truncatula]	CPRF2	Light-inducible protein CPRF2 OS=Petroselinum crispum GN=CPRF2 PE=2 SV=2	GO:0001228(transcriptional activator activity, RNA polymerase II transcription regulatory region sequence-specific DNA binding);GO:0003677(DNA binding);GO:0003700(DNA binding transcription factor activity);GO:0005515(protein binding);GO:0005634(nucleus);GO:0006351(transcription, DNA-templated);GO:0006355(regulation of transcription, DNA-templated);GO:0042802(identical protein binding);GO:0046982(…	ENOG4111S51(Transcription factor)	NA	NA	NA	NA(NA)	G7L1X5.1 PF12498.6;bZIP_C;	1.81	24.66	-3.54273	down	3.29437e-12	3.43754e-10	yes
TRINITY_DN25221_c0_g2	493	TRINITY_DN25221_c0_g2_i1;TRINITY_DN25221_c0_g2_i2;TRINITY_DN25221_c0_g2_i3;TRINITY_DN25221_c0_g2_i4;TRINITY_DN25221_c0_g2_i5;TRINITY_DN25221_c0_g2_i6	heavy metal-associated domain protein [Medicago truncatula]	-	-	-	-	-	-	-	-	-	205.86	32.55	2.94443	up	3.33795e-12	3.46997e-10	yes
TRINITY_DN16441_c0_g2	747	TRINITY_DN16441_c0_g2_i1;TRINITY_DN16441_c0_g2_i2;TRINITY_DN16441_c0_g2_i3	uncharacterized protein LOC11405634 [Medicago truncatula]	-	-	GO:0003674(molecular_function);GO:0008150(biological_process);GO:0009507(chloroplast)	ENOG410ZEZZ(NA)	-	-	-	-	-	86.09	10.37	3.12301	up	3.71691e-12	3.8495e-10	yes
TRINITY_DN17410_c1_g4	647	TRINITY_DN17410_c1_g4_i1;TRINITY_DN17410_c1_g4_i2	NAC domain protein NAC3 [Medicago sativa]	NAC102	NAC domain-containing protein 102 OS=Arabidopsis thaliana GN=NAC102 PE=1 SV=1	GO:0003677(DNA binding);GO:0005515(protein binding);GO:0005634(nucleus);GO:0006351(transcription, DNA-templated);GO:0007275(multicellular organism development);GO:0008361(regulation of cell size);GO:0009416(response to light stimulus);GO:0009611(response to wounding);GO:0009620(response to fungus);GO:0009744(response to sucrose);GO:0009751(response to salicylic acid);GO:0009753(response to jasmon…	ENOG410YE96(Nac domain-containing protein)	K03094	S-phase kinase-associated protein 1	-	lja04141(Protein processing in endoplasmic reticulum);lja04120(Ubiquitin mediated proteolysis)	W9R0J7.1 PF02365.13;NAM;	52.44	8.76	2.75937	up	3.85011e-12	3.97263e-10	yes
TRINITY_DN12123_c0_g3	648	TRINITY_DN12123_c0_g3_i1	hypothetical protein MTR_5g020110 [Medicago truncatula]	-	-	-	ENOG411065E(NA)	-	-	-	-	-	8.83	0.05	7.36217	up	4.09099e-12	4.20553e-10	yes
TRINITY_DN16882_c0_g3	1792	TRINITY_DN16882_c0_g3_i1;TRINITY_DN16882_c0_g3_i2	unknown [Medicago truncatula]	-	-	-	-	NA	NA	NA	NA(NA)	-	29.41	2.99	3.40123	up	4.1089e-12	4.20837e-10	yes
TRINITY_DN22738_c0_g1	2406	TRINITY_DN22738_c0_g1_i1;TRINITY_DN22738_c0_g1_i10;TRINITY_DN22738_c0_g1_i2;TRINITY_DN22738_c0_g1_i3;TRINITY_DN22738_c0_g1_i4;TRINITY_DN22738_c0_g1_i5;TRINITY_DN22738_c0_g1_i6;TRINITY_DN22738_c0_g1_i7;TRINITY_DN22738_c0_g1_i8;TRINITY_DN22738_c0_g1_i9	two-component response regulator-like APRR9 isoform X1 [Medicago truncatula]	APRR5	Two-component response regulator-like APRR5 OS=Arabidopsis thaliana GN=APRR5 PE=1 SV=2	GO:0000156(phosphorelay response regulator activity);GO:0000160(phosphorelay signal transduction system);GO:0003677(DNA binding);GO:0005515(protein binding);GO:0005634(nucleus);GO:0006351(transcription, DNA-templated);GO:0006355(regulation of transcription, DNA-templated);GO:0007623(circadian rhythm);GO:0009266(response to temperature stimulus);GO:0010017(red or far-red light signaling pathway);G…	COG5641(Transcription factor)	K12130	pseudo-response regulator 5	-	mtr04712(Circadian rhythm - plant)	G7J905.1 PF00072.22;Response_reg;	8.28	56.83	-2.64503	down	4.53852e-12	4.63129e-10	yes
TRINITY_DN16983_c0_g1	1826	TRINITY_DN16983_c0_g1_i1;TRINITY_DN16983_c0_g1_i2;TRINITY_DN16983_c0_g1_i3	probable glycerol-3-phosphate acyltransferase 2 [Medicago truncatula]	GPAT2	Probable glycerol-3-phosphate acyltransferase 2 OS=Arabidopsis thaliana GN=GPAT2 PE=2 SV=1	GO:0010143(cutin biosynthetic process);GO:0016020(membrane);GO:0016311(dephosphorylation);GO:0016791(phosphatase activity);GO:0090447(glycerol-3-phosphate 2-O-acyltransferase activity)	ENOG410YBBE(glycerol-3-phosphate acyltransferase)	K13508	glycerol-3-phosphate acyltransferase	EC:2.3.1.15 2.3.1.198	mtr00561(Glycerolipid metabolism);mtr00564(Glycerophospholipid metabolism)	G7ICV2.1 PF01553.19;Acyltransferase;	57.2	7.27	3.23577	up	4.88736e-12	4.95878e-10	yes
TRINITY_DN17100_c1_g2	632	TRINITY_DN17100_c1_g2_i1	uncharacterized protein LOC11435965 [Medicago truncatula]	-	-	-	-	-	-	-	-	-	23.91	0.94	4.81519	up	4.89518e-12	4.95878e-10	yes
TRINITY_DN19972_c1_g2	1509	TRINITY_DN19972_c1_g2_i1;TRINITY_DN19972_c1_g2_i2;TRINITY_DN19972_c1_g2_i3;TRINITY_DN19972_c1_g2_i4;TRINITY_DN19972_c1_g2_i5	UDP-glycosyltransferase 74G1 [Medicago truncatula]	UGT74F2	UDP-glycosyltransferase 74F2 OS=Arabidopsis thaliana GN=UGT74F2 PE=1 SV=1	GO:0009813(flavonoid biosynthetic process);GO:0043231(intracellular membrane-bounded organelle);GO:0052696(flavonoid glucuronidation);GO:0080043(quercetin 3-O-glucosyltransferase activity);GO:0080044(quercetin 7-O-glucosyltransferase activity)	COG1819(Transferase)	NA	NA	NA	NA(NA)	A0A072UJF1.1 PF00201.16;UDPGT;	24.74	2.88	3.98055	up	5.51048e-12	5.56178e-10	yes
TRINITY_DN24498_c0_g1	1892	TRINITY_DN24498_c0_g1_i1;TRINITY_DN24498_c0_g1_i2;TRINITY_DN24498_c0_g1_i3;TRINITY_DN24498_c0_g1_i4	IRK-interacting protein isoform X1 [Medicago truncatula]	IRKI	IRK-interacting protein OS=Arabidopsis thaliana GN=IRKI PE=1 SV=1	GO:0005515(protein binding);GO:0005634(nucleus);GO:0008150(biological_process)	ENOG410Y9VT(expressed protein)	-	-	-	-	-	8.51	61.51	-2.66445	down	5.53947e-12	5.57078e-10	yes
TRINITY_DN19990_c0_g1	340	TRINITY_DN19990_c0_g1_i1	-	-	-	-	-	-	-	-	-	-	0.6	49.89	-6.12483	down	6.04514e-12	6.05656e-10	yes
TRINITY_DN14204_c0_g5	432	TRINITY_DN14204_c0_g5_i1	conserved hypothetical protein [Medicago truncatula]	-	-	-	ENOG410ZBZ5(NA)	-	-	-	-	Q2HTZ6.1 PF12734.5;CYSTM;	110.41	6.81	4.14905	up	6.06616e-12	6.05656e-10	yes
TRINITY_DN11467_c0_g1	1302	TRINITY_DN11467_c0_g1_i1	probable xyloglucan endotransglucosylase/hydrolase protein 23 [Medicago truncatula]	XTH22	Xyloglucan endotransglucosylase/hydrolase protein 22 OS=Arabidopsis thaliana GN=XTH22 PE=1 SV=1	GO:0004553(hydrolase activity, hydrolyzing O-glycosyl compounds);GO:0005576(extracellular region);GO:0005618(cell wall);GO:0005794(Golgi apparatus);GO:0010411(xyloglucan metabolic process);GO:0016762(xyloglucan:xyloglucosyl transferase activity);GO:0016798(hydrolase activity, acting on glycosyl bonds);GO:0042546(cell wall biogenesis);GO:0048046(apoplast);GO:0071555(cell wall organization)	COG2273(hydrolase family 16)	K14504	xyloglucan:xyloglucosyl transferase TCH4	EC:2.4.1.207	mtr04075(Plant hormone signal transduction)	G7JT81.1 PF00722.19;Glyco_hydro_16;	43.89	6.66	2.89928	up	6.5622e-12	6.52833e-10	yes
TRINITY_DN19334_c0_g1	933	TRINITY_DN19334_c0_g1_i1;TRINITY_DN19334_c0_g1_i2;TRINITY_DN19334_c0_g1_i3;TRINITY_DN19334_c0_g1_i4;TRINITY_DN19334_c0_g1_i5	unknown [Medicago truncatula]	CK1	Probable choline kinase 1 OS=Arabidopsis thaliana GN=CK1 PE=2 SV=1	GO:0004103(choline kinase activity);GO:0005524(ATP binding);GO:0005737(cytoplasm);GO:0009611(response to wounding);GO:0016310(phosphorylation)	COG0510(Ethanolamine kinase)	K14156	choline/ethanolamine kinase	EC:2.7.1.32 2.7.1.82	mtr00564(Glycerophospholipid metabolism)	-	141.31	29.8	2.59088	up	6.91335e-12	6.8531e-10	yes
TRINITY_DN14566_c0_g1	1130	TRINITY_DN14566_c0_g1_i1;TRINITY_DN14566_c0_g1_i2	uncharacterized protein LOC11409749 [Medicago truncatula]	-	-	GO:0005739(mitochondrion);GO:0009970(cellular response to sulfate starvation);GO:0016021(integral component of membrane);GO:0016787(hydrolase activity)	COG0596(Alpha beta hydrolase)	-	-	-	-	I1LMQ8.1 PF10457.7;MENTAL;	47.81	11.53	2.22433	up	6.95898e-12	6.87379e-10	yes
TRINITY_DN19108_c0_g2	788	TRINITY_DN19108_c0_g2_i1	uncharacterized protein LOC25487390 [Medicago truncatula]	-	-	GO:0003674(molecular_function);GO:0005739(mitochondrion);GO:0008150(biological_process)	ENOG41119QU(NA)	-	-	-	-	-	48.41	6.07	3.16604	up	7.21458e-12	7.10099e-10	yes
TRINITY_DN18076_c0_g1	1705	TRINITY_DN18076_c0_g1_i1;TRINITY_DN18076_c0_g1_i10;TRINITY_DN18076_c0_g1_i11;TRINITY_DN18076_c0_g1_i12;TRINITY_DN18076_c0_g1_i13;TRINITY_DN18076_c0_g1_i2;TRINITY_DN18076_c0_g1_i3;TRINITY_DN18076_c0_g1_i4;TRINITY_DN18076_c0_g1_i5;TRINITY_DN18076_c0_g1_i6;TRINITY_DN18076_c0_g1_i7;TRINITY_DN18076_c0_g1_i8;TRINITY_DN18076_c0_g1_i9	putative cupredoxin [Medicago truncatula]	At4g27520	Early nodulin-like protein 2 OS=Arabidopsis thaliana GN=At4g27520 PE=1 SV=1	GO:0046658(anchored component of plasma membrane)	ENOG410Z06C(Early nodulin-like protein)	K03006	DNA-directed RNA polymerase II subunit RPB1	EC:2.7.7.6	thj00230(Purine metabolism);thj00240(Pyrimidine metabolism);thj03020(RNA polymerase)	A0A072VAS3.1 PF02298.15;Cu_bind_like;	1121.7	229.5	2.48464	up	7.40482e-12	7.26248e-10	yes
TRINITY_DN26158_c1_g3	484	TRINITY_DN26158_c1_g3_i1	aspartic proteinase PCS1 [Medicago truncatula]	PCS1	Aspartic proteinase PCS1 OS=Arabidopsis thaliana GN=PCS1 PE=2 SV=1	GO:0004190(aspartic-type endopeptidase activity);GO:0006508(proteolysis);GO:0030163(protein catabolic process)	ENOG410XNV7(aspartic)	NA	NA	NA	NA(NA)	G7KG25.1 PF14543.4;TAXi_N;	259.55	61.62	2.26929	up	7.51744e-12	7.34698e-10	yes
TRINITY_DN16503_c0_g1	404	TRINITY_DN16503_c0_g1_i1;TRINITY_DN16503_c0_g1_i2;TRINITY_DN16503_c0_g1_i3;TRINITY_DN16503_c0_g1_i4;TRINITY_DN16503_c0_g1_i5;TRINITY_DN16503_c0_g1_i6;TRINITY_DN16503_c0_g1_i7;TRINITY_DN16503_c0_g1_i8	hypothetical protein MTR_1g034270 [Medicago truncatula]	-	-	-	-	-	-	-	-	-	251.8	25.74	3.62516	up	8.42775e-12	8.20774e-10	yes
TRINITY_DN24927_c0_g3	1427	TRINITY_DN24927_c0_g3_i1	heat shock 70 kDa protein [Medicago truncatula]	HSP70	Heat shock 70 kDa protein OS=Glycine max GN=HSP70 PE=3 SV=1	GO:0005524(ATP binding);GO:0005618(cell wall);GO:0005634(nucleus);GO:0005739(mitochondrion);GO:0005774(vacuolar membrane);GO:0005794(Golgi apparatus);GO:0005829(cytosol);GO:0005886(plasma membrane);GO:0006351(transcription, DNA-templated);GO:0006355(regulation of transcription, DNA-templated);GO:0006457(protein folding);GO:0006986(response to unfolded protein);GO:0009266(response to temperature s…	COG0443(Heat shock protein)	K03283	heat shock 70kDa protein 1/2/6/8	-	mtr03040(Spliceosome);mtr04141(Protein processing in endoplasmic reticulum);mtr04144(Endocytosis)	F6HYK6.1 PF00012.18;HSP70;	21.72	3.12	2.9505	up	9.73959e-12	9.4368e-10	yes
TRINITY_DN14315_c0_g3	826	TRINITY_DN14315_c0_g3_i1	uncharacterized protein LOC25499396 [Medicago truncatula]	-	-	GO:0003674(molecular_function);GO:0005634(nucleus);GO:0005886(plasma membrane);GO:0008150(biological_process)	ENOG410YUY6(NA)	-	-	-	-	-	126.85	29.22	2.28596	up	9.75775e-12	9.4368e-10	yes
TRINITY_DN17235_c0_g2	2050	TRINITY_DN17235_c0_g2_i1;TRINITY_DN17235_c0_g2_i2;TRINITY_DN17235_c0_g2_i3;TRINITY_DN17235_c0_g2_i4;TRINITY_DN17235_c0_g2_i5;TRINITY_DN17235_c0_g2_i6	protein phosphatase 2C-like protein [Medicago truncatula]	Os01g0295700	Probable protein phosphatase 2C 2 OS=Oryza sativa subsp. japonica GN=Os01g0295700 PE=2 SV=1	GO:0004722(protein serine/threonine phosphatase activity);GO:0005739(mitochondrion);GO:0006470(protein dephosphorylation);GO:0046872(metal ion binding)	COG0631(Phosphatase)	NA	NA	NA	NA(NA)	G7IBT7.1 PF00481.19;PP2C;	110.22	24.61	2.36515	up	1.00053e-11	9.64261e-10	yes
TRINITY_DN20760_c0_g2	1672	TRINITY_DN20760_c0_g2_i1;TRINITY_DN20760_c0_g2_i2;TRINITY_DN20760_c0_g2_i3	UDP-glycosyltransferase 84B2 [Medicago truncatula]	UGT84B2	UDP-glycosyltransferase 84B2 OS=Arabidopsis thaliana GN=UGT84B2 PE=3 SV=1	GO:0009813(flavonoid biosynthetic process);GO:0043231(intracellular membrane-bounded organelle);GO:0052696(flavonoid glucuronidation);GO:0080043(quercetin 3-O-glucosyltransferase activity);GO:0080044(quercetin 7-O-glucosyltransferase activity)	COG1819(Transferase)	NA	NA	NA	NA(NA)	A0A0D2SMC2.1 PF00201.16;UDPGT;	287.67	44.38	2.8801	up	1.04947e-11	1.00793e-09	yes
TRINITY_DN12151_c0_g1	975	TRINITY_DN12151_c0_g1_i1;TRINITY_DN12151_c0_g1_i2;TRINITY_DN12151_c0_g1_i3	-	-	-	-	-	-	-	-	-	-	17.61	0.82	4.62255	up	1.06578e-11	1.02006e-09	yes
TRINITY_DN14032_c0_g1	887	TRINITY_DN14032_c0_g1_i1;TRINITY_DN14032_c0_g1_i2;TRINITY_DN14032_c0_g1_i3;TRINITY_DN14032_c0_g1_i4;TRINITY_DN14032_c0_g1_i5;TRINITY_DN14032_c0_g1_i6	hypothetical protein GLYMA_06G171100 [Glycine max]	-	-	GO:0005509(calcium ion binding)	ENOG410YVEP(NA)	K13448	calcium-binding protein CML	-	mtr04626(Plant-pathogen interaction)	G7J5J1.1 PF13833.4;EF-hand_8;	47.38	3.63	3.898	up	1.14142e-11	1.0887e-09	yes
TRINITY_DN23799_c0_g1	2339	TRINITY_DN23799_c0_g1_i1;TRINITY_DN23799_c0_g1_i10;TRINITY_DN23799_c0_g1_i2;TRINITY_DN23799_c0_g1_i3;TRINITY_DN23799_c0_g1_i4;TRINITY_DN23799_c0_g1_i5;TRINITY_DN23799_c0_g1_i6;TRINITY_DN23799_c0_g1_i7;TRINITY_DN23799_c0_g1_i8;TRINITY_DN23799_c0_g1_i9	uncharacterized protein LOC11445217 [Medicago truncatula]	algC	Phosphomannomutase/phosphoglucomutase OS=Pseudomonas syringae pv. tomato (strain ATCC BAA-871 / DC3000) GN=algC PE=3 SV=1	GO:0004615(phosphomannomutase activity);GO:0005829(cytosol)	COG1109(Catalyzes the conversion of glucosamine-6-phosphate to glucosamine-1-phosphate (By similarity))	-	-	-	-	I1NDA5.1 PF02878.14;PGM_PMM_I;	7.51	69.2	-2.94271	down	1.1689e-11	1.1111e-09	yes
TRINITY_DN23190_c0_g1	1192	TRINITY_DN23190_c0_g1_i1;TRINITY_DN23190_c0_g1_i2;TRINITY_DN23190_c0_g1_i3;TRINITY_DN23190_c0_g1_i4	1-aminocyclopropane-1-carboxylate oxidase homolog 1 [Medicago truncatula]	At1g06620	1-aminocyclopropane-1-carboxylate oxidase homolog 1 OS=Arabidopsis thaliana GN=At1g06620 PE=2 SV=1	GO:0051213(dioxygenase activity)	COG3491(2OGFe(II) oxygenase)	K13229	2,4-dihydroxy-1,4-benzoxazin-3-one-glucoside dioxygenase	EC:1.14.11.59	zma00402(Benzoxazinoid biosynthesis)	G7IH23.1 PF14226.4;DIOX_N;	151.77	25.19	2.83961	up	1.21486e-11	1.15084e-09	yes
TRINITY_DN13783_c0_g1	2282	TRINITY_DN13783_c0_g1_i1	Putative ribonuclease H protein At1g65750 family, partial [Cajanus cajan]	-	-	-	ENOG4111MK6(Retrotransposon protein)	-	-	-	-	-	5.03	0.23	4.67791	up	1.29147e-11	1.21925e-09	yes
TRINITY_DN22964_c0_g2	1790	TRINITY_DN22964_c0_g2_i1;TRINITY_DN22964_c0_g2_i10;TRINITY_DN22964_c0_g2_i11;TRINITY_DN22964_c0_g2_i12;TRINITY_DN22964_c0_g2_i13;TRINITY_DN22964_c0_g2_i14;TRINITY_DN22964_c0_g2_i15;TRINITY_DN22964_c0_g2_i16;TRINITY_DN22964_c0_g2_i2;TRINITY_DN22964_c0_g2_i3;TRINITY_DN22964_c0_g2_i4;TRINITY_DN22964_c0_g2_i5;TRINITY_DN22964_c0_g2_i6;TRINITY_DN22964_c0_g2_i7;TRINITY_DN22964_c0_g2_i8;TRINITY_DN22964_c…	protein disulfide isomerase pTAC5, chloroplastic [Medicago truncatula]	-	-	GO:0000427(plastid-encoded plastid RNA polymerase complex);GO:0003756(protein disulfide isomerase activity);GO:0005515(protein binding);GO:0006355(regulation of transcription, DNA-templated);GO:0009295(nucleoid);GO:0009408(response to heat);GO:0009416(response to light stimulus);GO:0009507(chloroplast);GO:0009508(plastid chromosome);GO:0009534(chloroplast thylakoid);GO:0009535(chloroplast thylako…	ENOG4111TC7(Putative peptidoglycan binding domain)	-	-	-	-	G7I2L5.1 PF01471.16;PG_binding_1;	5.9	34.81	-2.33649	down	1.38256e-11	1.30083e-09	yes
TRINITY_DN17040_c1_g2	1314	TRINITY_DN17040_c1_g2_i1;TRINITY_DN17040_c1_g2_i2;TRINITY_DN17040_c1_g2_i3;TRINITY_DN17040_c1_g2_i4;TRINITY_DN17040_c1_g2_i5;TRINITY_DN17040_c1_g2_i6;TRINITY_DN17040_c1_g2_i7	caffeoylshikimate esterase isoform X2 [Medicago truncatula]	CSE	Caffeoylshikimate esterase OS=Arabidopsis thaliana GN=CSE PE=1 SV=1	GO:0006629(lipid metabolic process);GO:0016020(membrane);GO:0016298(lipase activity)	COG2267(alpha beta hydrolase fold)	K01054	acylglycerol lipase	EC:3.1.1.23	mtr00561(Glycerolipid metabolism)	A0A072W2N7.1 PF12146.6;Hydrolase_4;	112.47	21.88	2.50929	up	1.42685e-11	1.33796e-09	yes
TRINITY_DN19390_c0_g4	1215	TRINITY_DN19390_c0_g4_i1	gibberellin 2-beta-dioxygenase 2 [Medicago truncatula]	GA2OX2	Gibberellin 2-beta-dioxygenase 2 OS=Pisum sativum GN=GA2OX2 PE=2 SV=1	GO:0009416(response to light stimulus);GO:0045487(gibberellin catabolic process);GO:0052634(C-19 gibberellin 2-beta-dioxygenase activity)	COG3491(2OGFe(II) oxygenase)	K04125	gibberellin 2-oxidase	EC:1.14.11.13	mtr00904(Diterpenoid biosynthesis)	G7ICU1.1 PF03171.18;2OG-FeII_Oxy;	7.12	0.16	5.66553	up	1.4711e-11	1.37481e-09	yes
TRINITY_DN13365_c0_g1	1168	TRINITY_DN13365_c0_g1_i1	F-box protein At2g27310 [Medicago truncatula]	At2g27310	F-box protein At2g27310 OS=Arabidopsis thaliana GN=At2g27310 PE=2 SV=1	GO:0003674(molecular_function);GO:0008150(biological_process)	ENOG410YK80(F-box protein)	-	-	-	-	G7IHH4.1 PF00646.31;F-box;	56.53	7.77	3.01593	up	1.57566e-11	1.46758e-09	yes
TRINITY_DN10081_c0_g1	602	TRINITY_DN10081_c0_g1_i1	putative calcium-binding protein CML23 [Medicago truncatula]	CML19	Putative calcium-binding protein CML19 OS=Oryza sativa subsp. japonica GN=CML19 PE=3 SV=1	GO:0005509(calcium ion binding)	COG5126(Calcium-binding protein)	K13448	calcium-binding protein CML	-	mtr04626(Plant-pathogen interaction)	G7KNL8.1 PF13499.4;EF-hand_7;	37.09	0.5	6.36823	up	1.63833e-11	1.52085e-09	yes
TRINITY_DN24297_c1_g2	401	TRINITY_DN24297_c1_g2_i1;TRINITY_DN24297_c1_g2_i2;TRINITY_DN24297_c1_g2_i3	unknown [Medicago truncatula]	-	-	-	-	-	-	-	-	-	874.09	227.16	2.15362	up	1.65024e-11	1.5268e-09	yes
TRINITY_DN19290_c0_g1	686	TRINITY_DN19290_c0_g1_i1;TRINITY_DN19290_c0_g1_i10;TRINITY_DN19290_c0_g1_i11;TRINITY_DN19290_c0_g1_i12;TRINITY_DN19290_c0_g1_i13;TRINITY_DN19290_c0_g1_i14;TRINITY_DN19290_c0_g1_i15;TRINITY_DN19290_c0_g1_i2;TRINITY_DN19290_c0_g1_i3;TRINITY_DN19290_c0_g1_i4;TRINITY_DN19290_c0_g1_i5;TRINITY_DN19290_c0_g1_i6;TRINITY_DN19290_c0_g1_i7;TRINITY_DN19290_c0_g1_i8;TRINITY_DN19290_c0_g1_i9	thioredoxin H2 [Medicago truncatula]	TRX2	Thioredoxin H2 OS=Arabidopsis thaliana GN=TRX2 PE=2 SV=2	GO:0000103(sulfate assimilation);GO:0005829(cytosol);GO:0005886(plasma membrane);GO:0006457(protein folding);GO:0015035(protein disulfide oxidoreductase activity);GO:0016671(oxidoreductase activity, acting on a sulfur group of donors, disulfide as acceptor);GO:0034599(cellular response to oxidative stress);GO:0045454(cell redox homeostasis);GO:0055114(oxidation-reduction process)	COG0526(Thioredoxin)	NA	NA	NA	NA(NA)	D8L5E0.1 PF00085.18;Thioredoxin;	288.73	18.48	4.183	up	1.69369e-11	1.5618e-09	yes
TRINITY_DN4502_c0_g1	336	TRINITY_DN4502_c0_g1_i1	uncharacterized protein LOC114168454 [Vigna unguiculata]	-	-	-	-	-	-	-	-	-	62.17	1.89	5.30138	up	1.78212e-11	1.6379e-09	yes
TRINITY_DN15694_c0_g1	888	TRINITY_DN15694_c0_g1_i1;TRINITY_DN15694_c0_g1_i2;TRINITY_DN15694_c0_g1_i3;TRINITY_DN15694_c0_g1_i4;TRINITY_DN15694_c0_g1_i5;TRINITY_DN15694_c0_g1_i6	unknown [Medicago truncatula]	MEE14	CCG-binding protein 1 OS=Arabidopsis thaliana GN=MEE14 PE=1 SV=1	GO:0005515(protein binding);GO:0005634(nucleus);GO:0005829(cytosol);GO:0009507(chloroplast);GO:0009793(embryo development ending in seed dormancy);GO:0010183(pollen tube guidance);GO:0036033(mediator complex binding);GO:0050832(defense response to fungus)	ENOG41123WT(NA)	-	-	-	-	-	10.44	89.36	-2.87233	down	1.8121e-11	1.65995e-09	yes
TRINITY_DN13914_c2_g4	1751	TRINITY_DN13914_c2_g4_i1;TRINITY_DN13914_c2_g4_i2;TRINITY_DN13914_c2_g4_i3	U-box domain-containing protein 9 [Medicago truncatula]	PUB9	U-box domain-containing protein 9 OS=Arabidopsis thaliana GN=PUB9 PE=1 SV=1	GO:0005634(nucleus);GO:0005737(cytoplasm)	ENOG410XRTN(U-box domain-containing protein)	NA	NA	NA	NA(NA)	G7L2Z7.2 PF04564.13;U-box;	41.47	6.98	2.59427	up	1.83794e-11	1.67809e-09	yes
TRINITY_DN21813_c0_g3	975	TRINITY_DN21813_c0_g3_i1;TRINITY_DN21813_c0_g3_i2	hypothetical protein MtrDRAFT_AC158502g25v2 [Medicago truncatula]	-	-	-	-	-	-	-	-	-	0.32	28.96	-6.35709	down	1.89296e-11	1.72265e-09	yes
TRINITY_DN21502_c0_g4	1694	TRINITY_DN21502_c0_g4_i1;TRINITY_DN21502_c0_g4_i2;TRINITY_DN21502_c0_g4_i3;TRINITY_DN21502_c0_g4_i4;TRINITY_DN21502_c0_g4_i5;TRINITY_DN21502_c0_g4_i6	B-box zinc finger protein 24 isoform X2 [Medicago truncatula]	BBX25	B-box zinc finger protein 25 OS=Arabidopsis thaliana GN=BBX25 PE=1 SV=2	GO:0005634(nucleus);GO:0006355(regulation of transcription, DNA-templated);GO:0009640(photomorphogenesis)	ENOG410YBMW(nucleic acid binding transcription factor activity)	-	-	-	-	G7IHV4.1 PF00643.22;zf-B_box;	516.62	85.48	2.67477	up	1.92784e-11	1.74866e-09	yes
TRINITY_DN14364_c0_g3	765	TRINITY_DN14364_c0_g3_i1;TRINITY_DN14364_c0_g3_i2;TRINITY_DN14364_c0_g3_i3;TRINITY_DN14364_c0_g3_i4	putative proton-dependent oligopeptide transporter family, major facilitator superfamily [Medicago truncatula]	NPF1.1	Protein NRT1/ PTR FAMILY 1.1 OS=Arabidopsis thaliana GN=NPF1.1 PE=1 SV=2	GO:0005215(transporter activity);GO:0005886(plasma membrane);GO:0006857(oligopeptide transport);GO:0015333(peptide:proton symporter activity);GO:0015706(nitrate transport);GO:0016020(membrane);GO:0016021(integral component of membrane);GO:0055085(transmembrane transport);GO:0080054(low-affinity nitrate transmembrane transporter activity)	COG3104(transporter)	NA	NA	NA	NA(NA)	Q2HU43.1 PF00854.19;PTR2;	57.72	8.42	3.14911	up	2.04599e-11	1.84978e-09	yes
TRINITY_DN25248_c0_g6	887	TRINITY_DN25248_c0_g6_i1	uncharacterized protein LOC25482045 [Medicago truncatula]	-	-	-	ENOG4111E3N(NA)	-	-	-	-	B9IBN7.2 PF05097.10;DUF688;	80.28	13.88	2.70045	up	2.18154e-11	1.96593e-09	yes
TRINITY_DN20652_c0_g2	2382	TRINITY_DN20652_c0_g2_i1;TRINITY_DN20652_c0_g2_i10;TRINITY_DN20652_c0_g2_i11;TRINITY_DN20652_c0_g2_i12;TRINITY_DN20652_c0_g2_i13;TRINITY_DN20652_c0_g2_i14;TRINITY_DN20652_c0_g2_i15;TRINITY_DN20652_c0_g2_i16;TRINITY_DN20652_c0_g2_i17;TRINITY_DN20652_c0_g2_i18;TRINITY_DN20652_c0_g2_i2;TRINITY_DN20652_c0_g2_i3;TRINITY_DN20652_c0_g2_i4;TRINITY_DN20652_c0_g2_i5;TRINITY_DN20652_c0_g2_i6;TRINITY_DN20652…	putative mitogen-activated protein kinase CMGC-MAPK family [Medicago truncatula]	MPK3	Mitogen-activated protein kinase 3 OS=Arabidopsis thaliana GN=MPK3 PE=1 SV=2	GO:0004672(protein kinase activity);GO:0004707(MAP kinase activity);GO:0005515(protein binding);GO:0005524(ATP binding);GO:0005634(nucleus);GO:0005737(cytoplasm);GO:0006468(protein phosphorylation);GO:0006970(response to osmotic stress);GO:0006979(response to oxidative stress);GO:0007165(signal transduction);GO:0009409(response to cold);GO:0009555(pollen development);GO:0009611(response to woundi…	ENOG410XNY0(Mitogen-activated protein kinase)	K20536	mitogen-activated protein kinase 3	EC:2.7.11.24	gmx04016(MAPK signaling pathway - plant)	R0H4L6.1 PF00069.23;Pkinase;	239.13	48.25	2.44549	up	2.24944e-11	2.02056e-09	yes
TRINITY_DN18313_c0_g1	558	TRINITY_DN18313_c0_g1_i1;TRINITY_DN18313_c0_g1_i2;TRINITY_DN18313_c0_g1_i3;TRINITY_DN18313_c0_g1_i4;TRINITY_DN18313_c0_g1_i5;TRINITY_DN18313_c0_g1_i6	Bowman-Birk type proteinase inhibitor [Medicago truncatula]	-	Bowman-Birk type proteinase inhibitor OS=Lens culinaris PE=1 SV=2	-	ENOG410ZCRC(Bowman-Birk type)	-	-	-	-	-	30.04	1.54	5.00915	up	2.42854e-11	2.1744e-09	yes
TRINITY_DN16259_c1_g3	796	TRINITY_DN16259_c1_g3_i1;TRINITY_DN16259_c1_g3_i2	unknown [Medicago truncatula]	HAT4	Homeobox-leucine zipper protein HAT4 OS=Arabidopsis thaliana GN=HAT4 PE=1 SV=1	GO:0003677(DNA binding);GO:0003700(DNA binding transcription factor activity);GO:0005515(protein binding);GO:0005634(nucleus);GO:0006351(transcription, DNA-templated);GO:0006355(regulation of transcription, DNA-templated);GO:0008283(cell proliferation);GO:0009585(red, far-red light phototransduction);GO:0009641(shade avoidance);GO:0009733(response to auxin);GO:0009735(response to cytokinin);GO:00…	ENOG410Z2UE(homeobox-leucine zipper protein)	NA	NA	NA	NA(NA)	M0RWZ4.1 PF02183.16;HALZ;	113.37	23.23	2.45592	up	2.4498e-11	2.18639e-09	yes
TRINITY_DN23082_c0_g2	1666	TRINITY_DN23082_c0_g2_i1;TRINITY_DN23082_c0_g2_i2;TRINITY_DN23082_c0_g2_i3	zinc finger CCCH domain-containing protein 29 [Medicago truncatula]	At2g40140	Zinc finger CCCH domain-containing protein 29 OS=Arabidopsis thaliana GN=At2g40140 PE=2 SV=1	GO:0003677(DNA binding);GO:0003700(DNA binding transcription factor activity);GO:0005515(protein binding);GO:0005634(nucleus);GO:0006355(regulation of transcription, DNA-templated);GO:0009409(response to cold);GO:0010200(response to chitin);GO:0046872(metal ion binding);GO:0050832(defense response to fungus)	ENOG410XR0Z(zinc finger CCCH domain-containing protein)	NA	NA	NA	NA(NA)	A0A0J8D1N5.1 PF10477.7;EIF4E-T;	296.26	58.66	2.51482	up	2.47244e-11	2.19952e-09	yes
TRINITY_DN16781_c0_g1	818	TRINITY_DN16781_c0_g1_i1;TRINITY_DN16781_c0_g1_i2	uncharacterized protein LOC25492970 [Medicago truncatula]	-	-	-	ENOG4111CDN(NA)	-	-	-	-	-	2.74	41.36	-3.70914	down	2.51794e-11	2.23284e-09	yes
TRINITY_DN25221_c0_g4	608	TRINITY_DN25221_c0_g4_i1;TRINITY_DN25221_c0_g4_i2;TRINITY_DN25221_c0_g4_i3	unknown [Medicago truncatula]	-	-	GO:0005737(cytoplasm);GO:0030001(metal ion transport);GO:0046914(transition metal ion binding);GO:0046916(cellular transition metal ion homeostasis)	COG2608(heavy metal transport detoxification protein)	-	-	-	-	-	239.8	25.62	3.19474	up	2.59932e-11	2.29767e-09	yes
TRINITY_DN22271_c0_g3	1056	TRINITY_DN22271_c0_g3_i1;TRINITY_DN22271_c0_g3_i2;TRINITY_DN22271_c0_g3_i3;TRINITY_DN22271_c0_g3_i4;TRINITY_DN22271_c0_g3_i5	probable WRKY transcription factor 70 [Medicago truncatula]	WRKY70	Probable WRKY transcription factor 70 OS=Arabidopsis thaliana GN=WRKY70 PE=2 SV=1	GO:0003700(DNA binding transcription factor activity);GO:0005515(protein binding);GO:0005634(nucleus);GO:0006351(transcription, DNA-templated);GO:0006355(regulation of transcription, DNA-templated);GO:0009751(response to salicylic acid);GO:0009753(response to jasmonic acid);GO:0009862(systemic acquired resistance, salicylic acid mediated signaling pathway);GO:0009864(induced systemic resistance, …	ENOG41116A7(WRKY transcription factor)	K13459	disease resistance protein RPS2	-	adu04626(Plant-pathogen interaction)	G7LAR2.1 PF03106.13;WRKY;	1.41	34.47	-4.29926	down	2.81651e-11	2.48175e-09	yes
TRINITY_DN21480_c0_g2	1158	TRINITY_DN21480_c0_g2_i1;TRINITY_DN21480_c0_g2_i2;TRINITY_DN21480_c0_g2_i3;TRINITY_DN21480_c0_g2_i4	zinc finger CCCH domain-containing protein 29 [Medicago truncatula]	At2g40140	Zinc finger CCCH domain-containing protein 29 OS=Arabidopsis thaliana GN=At2g40140 PE=2 SV=1	GO:0003677(DNA binding);GO:0003700(DNA binding transcription factor activity);GO:0005515(protein binding);GO:0005634(nucleus);GO:0006355(regulation of transcription, DNA-templated);GO:0009409(response to cold);GO:0010200(response to chitin);GO:0046872(metal ion binding);GO:0050832(defense response to fungus)	ENOG410XR0Z(zinc finger CCCH domain-containing protein)	-	-	-	-	-	285.86	49.08	2.74757	up	2.8977e-11	2.54521e-09	yes
TRINITY_DN15784_c2_g1	997	TRINITY_DN15784_c2_g1_i1;TRINITY_DN15784_c2_g1_i2;TRINITY_DN15784_c2_g1_i3;TRINITY_DN15784_c2_g1_i4	calcium-binding protein CML24 [Medicago truncatula]	CML23	Probable calcium-binding protein CML23 OS=Arabidopsis thaliana GN=CML23 PE=2 SV=1	GO:0005509(calcium ion binding)	COG5126(Calcium-binding protein)	K13448	calcium-binding protein CML	-	mtr04626(Plant-pathogen interaction)	G7K1X5.1 PF13499.4;EF-hand_7;	43.27	4.52	3.39321	up	2.9867e-11	2.6151e-09	yes
TRINITY_DN16077_c1_g1	539	TRINITY_DN16077_c1_g1_i1;TRINITY_DN16077_c1_g1_i2;TRINITY_DN16077_c1_g1_i3	uncharacterized protein LOC11446161 [Medicago truncatula]	-	-	GO:0003674(molecular_function);GO:0008150(biological_process);GO:0016021(integral component of membrane)	ENOG410Y0HG(NA)	-	-	-	-	-	2.17	48.91	-4.32963	down	3.44719e-11	3.00881e-09	yes
TRINITY_DN23696_c0_g1	1922	TRINITY_DN23696_c0_g1_i1;TRINITY_DN23696_c0_g1_i2;TRINITY_DN23696_c0_g1_i3;TRINITY_DN23696_c0_g1_i4	transcription factor bHLH112-like isoform X2 [Cicer arietinum]	BHLH112	Transcription factor bHLH112 OS=Arabidopsis thaliana GN=BHLH112 PE=2 SV=1	GO:0001046(core promoter sequence-specific DNA binding);GO:0001228(transcriptional activator activity, RNA polymerase II transcription regulatory region sequence-specific DNA binding);GO:0005634(nucleus);GO:0006366(transcription by RNA polymerase II)	ENOG410YDUV(Whole genome shotgun sequence of line PN40024, scaffold_274.assembly12x (Fragment))	NA	NA	NA	NA(NA)	S8D3H3.1 PF00010.24;HLH;	30.93	6.98	2.20872	up	3.4667e-11	3.01635e-09	yes
TRINITY_DN15761_c0_g1	1422	TRINITY_DN15761_c0_g1_i1;TRINITY_DN15761_c0_g1_i2;TRINITY_DN15761_c0_g1_i3;TRINITY_DN15761_c0_g1_i4;TRINITY_DN15761_c0_g1_i5;TRINITY_DN15761_c0_g1_i6;TRINITY_DN15761_c0_g1_i7	Glycoside hydrolase, family 17 [Medicago truncatula]	-	Glucan endo-1,3-beta-glucosidase, basic isoform OS=Phaseolus vulgaris PE=2 SV=1	GO:0004553(hydrolase activity, hydrolyzing O-glycosyl compounds);GO:0030247(polysaccharide binding);GO:0046658(anchored component of plasma membrane)	ENOG410YAHP(glucan endo-1-3-beta-glucosidase)	K19892	glucan endo-1,3-beta-glucosidase 4	EC:3.2.1.39	mus00500(Starch and sucrose metabolism)	G7IG01.1 PF00332.16;Glyco_hydro_17;	15.83	104.97	-2.78749	down	3.62601e-11	3.14511e-09	yes
TRINITY_DN22446_c0_g1	2218	TRINITY_DN22446_c0_g1_i1;TRINITY_DN22446_c0_g1_i10;TRINITY_DN22446_c0_g1_i11;TRINITY_DN22446_c0_g1_i12;TRINITY_DN22446_c0_g1_i13;TRINITY_DN22446_c0_g1_i14;TRINITY_DN22446_c0_g1_i15;TRINITY_DN22446_c0_g1_i16;TRINITY_DN22446_c0_g1_i17;TRINITY_DN22446_c0_g1_i2;TRINITY_DN22446_c0_g1_i3;TRINITY_DN22446_c0_g1_i4;TRINITY_DN22446_c0_g1_i5;TRINITY_DN22446_c0_g1_i6;TRINITY_DN22446_c0_g1_i7;TRINITY_DN22446_…	putative protein kinase RLK-Pelle-DLSV family [Medicago truncatula]	At1g56140	Probable LRR receptor-like serine/threonine-protein kinase At1g56140 OS=Arabidopsis thaliana GN=At1g56140 PE=2 SV=2	GO:0004674(protein serine/threonine kinase activity);GO:0005886(plasma membrane)	COG0515(Serine Threonine protein kinase)	NA	NA	NA	NA(NA)	G7IJ72.2 PF00069.23;Pkinase;	85.69	19.32	2.40986	up	3.91862e-11	3.38832e-09	yes
TRINITY_DN15305_c0_g6	1999	TRINITY_DN15305_c0_g6_i1;TRINITY_DN15305_c0_g6_i2;TRINITY_DN15305_c0_g6_i3	WRKY transcription factor 56 [Medicago sativa]	WRKY40	Probable WRKY transcription factor 40 OS=Arabidopsis thaliana GN=WRKY40 PE=1 SV=1	GO:0002237(response to molecule of bacterial origin);GO:0003700(DNA binding transcription factor activity);GO:0005515(protein binding);GO:0005634(nucleus);GO:0006351(transcription, DNA-templated);GO:0006355(regulation of transcription, DNA-templated);GO:0009611(response to wounding);GO:0009751(response to salicylic acid);GO:0010200(response to chitin);GO:0031347(regulation of defense response);GO…	ENOG410YHES(WRKY transcription factor)	K18834	WRKY transcription factor 1	-	ath04626(Plant-pathogen interaction)	G7JEF3.2 PF03106.13;WRKY;	153.48	33.48	2.37204	up	4.16305e-11	3.5885e-09	yes
TRINITY_DN13062_c0_g1	1171	TRINITY_DN13062_c0_g1_i1;TRINITY_DN13062_c0_g1_i10;TRINITY_DN13062_c0_g1_i11;TRINITY_DN13062_c0_g1_i12;TRINITY_DN13062_c0_g1_i2;TRINITY_DN13062_c0_g1_i3;TRINITY_DN13062_c0_g1_i4;TRINITY_DN13062_c0_g1_i5;TRINITY_DN13062_c0_g1_i6;TRINITY_DN13062_c0_g1_i7;TRINITY_DN13062_c0_g1_i8;TRINITY_DN13062_c0_g1_i9	DnaJ-class molecular chaperone [Medicago truncatula]	-	DnaJ protein homolog ANJ1 OS=Atriplex nummularia PE=2 SV=1	GO:0005524(ATP binding);GO:0005618(cell wall);GO:0005730(nucleolus);GO:0005737(cytoplasm);GO:0005829(cytosol);GO:0005886(plasma membrane);GO:0006457(protein folding);GO:0009408(response to heat);GO:0009506(plasmodesma);GO:0009651(response to salt stress);GO:0009911(positive regulation of flower development);GO:0031072(heat shock protein binding);GO:0043462(regulation of ATPase activity);GO:004687…	COG0484(ATP binding to DnaK triggers the release of the substrate protein, thus completing the reaction cycle. Several rounds of ATP-dependent interactions between DnaJ, DnaK and GrpE are required for fully efficient folding. Also involved, together with DnaK and GrpE, in the DNA replication of plasmids through activation of initiation proteins (By similarity))	K09503	DnaJ homolog subfamily A member 2	-	mtr04141(Protein processing in endoplasmic reticulum)	G7IRG6.2 PF01556.16;DnaJ_C;	307.89	72.95	2.24897	up	4.23051e-11	3.63536e-09	yes
TRINITY_DN21252_c0_g1	2321	TRINITY_DN21252_c0_g1_i1;TRINITY_DN21252_c0_g1_i2	adagio protein 3 [Medicago truncatula]	ADO3	Adagio protein 3 OS=Arabidopsis thaliana GN=ADO3 PE=1 SV=1	GO:0004842(ubiquitin-protein transferase activity);GO:0005515(protein binding);GO:0005634(nucleus);GO:0005737(cytoplasm);GO:0006355(regulation of transcription, DNA-templated);GO:0006511(ubiquitin-dependent protein catabolic process);GO:0007623(circadian rhythm);GO:0009637(response to blue light);GO:0009881(photoreceptor activity);GO:0009908(flower development);GO:0009911(positive regulation of f…	ENOG410XRGE(Component of an E3 ubiquitin ligase complex that plays a central role in blue light-dependent circadian cycles. Acts as a blue light photoreceptor, due to the presence of FMN, that mediates light-regulated protein degradation of critical clock components by targeting them to the proteasome complex)	K12116	flavin-binding kelch repeat F-box protein 1	-	mtr04712(Circadian rhythm - plant)	I1KQC3.2 PF13426.5;PAS_9;	2.8	29.37	-3.22082	down	4.36094e-11	3.73587e-09	yes
TRINITY_DN21581_c1_g1	905	TRINITY_DN21581_c1_g1_i1;TRINITY_DN21581_c1_g1_i2;TRINITY_DN21581_c1_g1_i3;TRINITY_DN21581_c1_g1_i4;TRINITY_DN21581_c1_g1_i5;TRINITY_DN21581_c1_g1_i6;TRINITY_DN21581_c1_g1_i7;TRINITY_DN21581_c1_g1_i8;TRINITY_DN21581_c1_g1_i9	gibberellin-regulated protein 1 [Medicago truncatula]	GASA1	Gibberellin-regulated protein 1 OS=Arabidopsis thaliana GN=GASA1 PE=2 SV=2	GO:0004672(protein kinase activity);GO:0005524(ATP binding);GO:0005576(extracellular region);GO:0005618(cell wall);GO:0006468(protein phosphorylation);GO:0009505(plant-type cell wall);GO:0009737(response to abscisic acid);GO:0009739(response to gibberellin);GO:0009740(gibberellic acid mediated signaling pathway);GO:0009741(response to brassinosteroid);GO:0009826(unidimensional cell growth);GO:001…	ENOG410YWQ9(gast1 protein homolog 1)	K03860	phosphatidylinositol glycan, class Q	-	nnu00563(Glycosylphosphatidylinositol(GPI)-anchor biosynthesis)	G7I774.1 PF02704.12;GASA;	108.72	10.71	3.50932	up	4.70746e-11	4.01522e-09	yes
TRINITY_DN19637_c0_g1	936	TRINITY_DN19637_c0_g1_i1;TRINITY_DN19637_c0_g1_i2;TRINITY_DN19637_c0_g1_i3;TRINITY_DN19637_c0_g1_i4	protein C2-DOMAIN ABA-RELATED 3 [Medicago truncatula]	CAR4	Protein C2-DOMAIN ABA-RELATED 4 OS=Arabidopsis thaliana GN=CAR4 PE=1 SV=1	GO:0005096(GTPase activator activity);GO:0005515(protein binding);GO:0005543(phospholipid binding);GO:0005634(nucleus);GO:0005829(cytosol);GO:0005886(plasma membrane);GO:0006952(defense response);GO:0009651(response to salt stress);GO:0009738(abscisic acid-activated signaling pathway);GO:0009789(positive regulation of abscisic acid-activated signaling pathway);GO:0046872(metal ion binding);GO:190…	COG5038(Domain-Containing protein)	NA	NA	NA	NA(NA)	G7KPS8.1 PF00168.28;C2;	106.25	19.58	2.60565	up	4.71596e-11	4.01522e-09	yes
TRINITY_DN16110_c1_g1	974	TRINITY_DN16110_c1_g1_i1;TRINITY_DN16110_c1_g1_i2;TRINITY_DN16110_c1_g1_i3;TRINITY_DN16110_c1_g1_i4	hypothetical protein TSUD_110950 [Trifolium subterraneum]	BBX24	B-box zinc finger protein 24 OS=Arabidopsis thaliana GN=BBX24 PE=1 SV=1	GO:0005634(nucleus);GO:0006355(regulation of transcription, DNA-templated);GO:0009640(photomorphogenesis)	ENOG410YBMW(nucleic acid binding transcription factor activity)	-	-	-	-	F4IBY7.1 PF00643.22;zf-B_box;	1202.96	185.6	2.5001	up	4.81281e-11	4.08515e-09	yes
TRINITY_DN17299_c0_g1	1433	TRINITY_DN17299_c0_g1_i1;TRINITY_DN17299_c0_g1_i10;TRINITY_DN17299_c0_g1_i2;TRINITY_DN17299_c0_g1_i3;TRINITY_DN17299_c0_g1_i4;TRINITY_DN17299_c0_g1_i5;TRINITY_DN17299_c0_g1_i6;TRINITY_DN17299_c0_g1_i7;TRINITY_DN17299_c0_g1_i8;TRINITY_DN17299_c0_g1_i9	-	-	-	-	-	-	-	-	-	-	763.82	148.54	2.47356	up	4.83958e-11	4.09535e-09	yes
TRINITY_DN14571_c1_g1	588	TRINITY_DN14571_c1_g1_i1;TRINITY_DN14571_c1_g1_i2;TRINITY_DN14571_c1_g1_i3;TRINITY_DN14571_c1_g1_i4;TRINITY_DN14571_c1_g1_i5	heavy metal-associated isoprenylated plant protein 39-like [Abrus precatorius]	HIPP39	Heavy metal-associated isoprenylated plant protein 39 OS=Arabidopsis thaliana GN=HIPP39 PE=2 SV=1	GO:0005737(cytoplasm);GO:0030001(metal ion transport);GO:0046914(transition metal ion binding);GO:0046916(cellular transition metal ion homeostasis)	COG2608(heavy metal transport detoxification protein)	-	-	-	-	A0A072UKC7.1 PF00403.24;HMA;	699.13	101.29	2.74619	up	4.90998e-11	4.14229e-09	yes
TRINITY_DN13880_c0_g1	1309	TRINITY_DN13880_c0_g1_i1;TRINITY_DN13880_c0_g1_i2;TRINITY_DN13880_c0_g1_i3;TRINITY_DN13880_c0_g1_i4;TRINITY_DN13880_c0_g1_i5;TRINITY_DN13880_c0_g1_i6	putative chlorophyll A-B binding protein [Medicago truncatula]	SEP2	Stress enhanced protein 2, chloroplastic OS=Arabidopsis thaliana GN=SEP2 PE=2 SV=1	GO:0009507(chloroplast);GO:0009523(photosystem II);GO:0009535(chloroplast thylakoid membrane);GO:0009611(response to wounding);GO:0009765(photosynthesis, light harvesting);GO:0016021(integral component of membrane);GO:0016168(chlorophyll binding);GO:0071486(cellular response to high light intensity);GO:0071492(cellular response to UV-A)	ENOG410YH9Q(Stress enhanced protein 2)	-	-	-	-	V7CS59.1 PF00504.19;Chloroa_b-bind;	161.68	34.49	2.38661	up	5.18755e-11	4.3632e-09	yes
TRINITY_DN12491_c0_g1	1293	TRINITY_DN12491_c0_g1_i1	phosphate-responsive 1 family protein, partial [Medicago truncatula]	EXO	Protein EXORDIUM OS=Arabidopsis thaliana GN=EXO PE=2 SV=1	GO:0003674(molecular_function);GO:0005576(extracellular region);GO:0005615(extracellular space);GO:0005618(cell wall);GO:0005794(Golgi apparatus);GO:0005829(cytosol);GO:0009505(plant-type cell wall);GO:0009741(response to brassinosteroid);GO:0048046(apoplast)	ENOG410YFUT(Phi-1 protein)	-	-	-	-	K7KJ93.1 PF04674.10;Phi_1;	91	10.51	3.30323	up	5.28817e-11	4.43439e-09	yes
TRINITY_DN18050_c0_g1	1553	TRINITY_DN18050_c0_g1_i1;TRINITY_DN18050_c0_g1_i2;TRINITY_DN18050_c0_g1_i3;TRINITY_DN18050_c0_g1_i4;TRINITY_DN18050_c0_g1_i5	syntaxin-121 [Medicago truncatula]	SYP121	Syntaxin-121 OS=Arabidopsis thaliana GN=SYP121 PE=1 SV=1	GO:0000149(SNARE binding);GO:0005484(SNAP receptor activity);GO:0005886(plasma membrane);GO:0006886(intracellular protein transport);GO:0006887(exocytosis);GO:0006906(vesicle fusion);GO:0012505(endomembrane system);GO:0016021(integral component of membrane);GO:0031201(SNARE complex);GO:0048278(vesicle docking)	COG5074(SYNtaxin)	K08486	syntaxin 1B/2/3	-	mtr04130(SNARE interactions in vesicular transport)	G7I8J4.1 PF00804.23;Syntaxin;	87.95	21.6	2.2017	up	5.94024e-11	4.96618e-09	yes
TRINITY_DN25583_c0_g1	1882	TRINITY_DN25583_c0_g1_i1	uncharacterized protein LOC11421645 [Medicago truncatula]	EOGT	EGF domain-specific O-linked N-acetylglucosamine transferase OS=Gallus gallus GN=EOGT PE=2 SV=2	GO:0005576(extracellular region);GO:0016021(integral component of membrane);GO:0016757(transferase activity, transferring glycosyl groups)	ENOG410ZHQA(glycosyltransferase)	K18134	EGF domain-specific O-GlcNAc transferase	EC:2.4.1.255	lang00514(Other types of O-glycan biosynthesis)	G7KTG8.1 PF04577.12;DUF563;	9.73	0.77	3.8238	up	6.34355e-11	5.28744e-09	yes
TRINITY_DN23119_c0_g1	2799	TRINITY_DN23119_c0_g1_i1;TRINITY_DN23119_c0_g1_i10;TRINITY_DN23119_c0_g1_i11;TRINITY_DN23119_c0_g1_i12;TRINITY_DN23119_c0_g1_i13;TRINITY_DN23119_c0_g1_i2;TRINITY_DN23119_c0_g1_i3;TRINITY_DN23119_c0_g1_i4;TRINITY_DN23119_c0_g1_i5;TRINITY_DN23119_c0_g1_i6;TRINITY_DN23119_c0_g1_i7;TRINITY_DN23119_c0_g1_i8;TRINITY_DN23119_c0_g1_i9	alkaline/neutral invertase [Medicago truncatula]	INVC	Alkaline/neutral invertase C, mitochondrial OS=Arabidopsis thaliana GN=INVC PE=1 SV=1	GO:0004564(beta-fructofuranosidase activity);GO:0004575(sucrose alpha-glucosidase activity);GO:0005576(extracellular region);GO:0005739(mitochondrion);GO:0007623(circadian rhythm);GO:0010029(regulation of seed germination);GO:0048510(regulation of timing of transition from vegetative to reproductive phase)	ENOG410XPYN(glycopeptide alpha-N-acetylgalactosaminidase activity)	K02986	small subunit ribosomal protein S4	-	nta03010(Ribosome)	I1KMM2.2 PF12899.5;Glyco_hydro_100;	25.75	5.44	2.40245	up	6.39099e-11	5.31103e-09	yes
TRINITY_DN21662_c1_g2	509	TRINITY_DN21662_c1_g2_i1;TRINITY_DN21662_c1_g2_i2;TRINITY_DN21662_c1_g2_i3	probable carotenoid cleavage dioxygenase 4, chloroplastic [Medicago truncatula]	CCD4	Probable carotenoid cleavage dioxygenase 4, chloroplastic OS=Arabidopsis thaliana GN=CCD4 PE=1 SV=1	GO:0005515(protein binding);GO:0009507(chloroplast);GO:0010287(plastoglobule);GO:0016702(oxidoreductase activity, acting on single donors with incorporation of molecular oxygen, incorporation of two atoms of oxygen);GO:0046872(metal ion binding);GO:0055114(oxidation-reduction process)	COG3670(dioxygenase)	K09840	9-cis-epoxycarotenoid dioxygenase	EC:1.13.11.51	mtr00906(Carotenoid biosynthesis)	-	16.54	158.67	-3.07368	down	6.54444e-11	5.42231e-09	yes
TRINITY_DN23335_c0_g2	1037	TRINITY_DN23335_c0_g2_i1	NDR1/HIN1-like protein 10 [Medicago truncatula]	YLS9	Protein YLS9 OS=Arabidopsis thaliana GN=YLS9 PE=2 SV=1	GO:0006952(defense response);GO:0009506(plasmodesma);GO:0046658(anchored component of plasma membrane)	ENOG410YGQV(harpin-induced protein 1 domain containing protein, expressed)	-	-	-	-	A0A072U3B3.1 PF03168.11;LEA_2;	48.94	5.79	3.2517	up	6.84591e-11	5.6447e-09	yes
TRINITY_DN24123_c0_g1	1825	TRINITY_DN24123_c0_g1_i1;TRINITY_DN24123_c0_g1_i2;TRINITY_DN24123_c0_g1_i3;TRINITY_DN24123_c0_g1_i4;TRINITY_DN24123_c0_g1_i5;TRINITY_DN24123_c0_g1_i6;TRINITY_DN24123_c0_g1_i7	zinc finger protein CONSTANS-LIKE 9 [Medicago truncatula]	COL9	Zinc finger protein CONSTANS-LIKE 9 OS=Arabidopsis thaliana GN=COL9 PE=2 SV=1	GO:0003700(DNA binding transcription factor activity);GO:0005515(protein binding);GO:0005634(nucleus);GO:0006355(regulation of transcription, DNA-templated);GO:0007623(circadian rhythm);GO:0008270(zinc ion binding);GO:0048579(negative regulation of long-day photoperiodism, flowering)	ENOG410YA5C(Zinc finger protein CONSTANS-LIKE)	K12135	zinc finger protein CONSTANS	-	aly04712(Circadian rhythm - plant)	A0A0D2PVD3.1 PF00643.22;zf-B_box;	4.64	29.81	-2.50396	down	6.85352e-11	5.6447e-09	yes
TRINITY_DN25116_c1_g4	620	TRINITY_DN25116_c1_g4_i1;TRINITY_DN25116_c1_g4_i2	-	-	-	-	-	-	-	-	-	-	28.55	1.72	4.21693	up	7.03332e-11	5.77564e-09	yes
TRINITY_DN22499_c0_g1	1637	TRINITY_DN22499_c0_g1_i1;TRINITY_DN22499_c0_g1_i2;TRINITY_DN22499_c0_g1_i3	putative 2-acylglycerol O-acyltransferase [Medicago truncatula]	Rv0183	Monoacylglycerol lipase OS=Mycobacterium tuberculosis (strain ATCC 25618 / H37Rv) GN=Rv0183 PE=1 SV=2	GO:0006629(lipid metabolic process);GO:0016020(membrane);GO:0016298(lipase activity)	COG2267(alpha beta hydrolase fold)	K01054	acylglycerol lipase	EC:3.1.1.23	pxb00561(Glycerolipid metabolism)	W9S782.1 PF12146.6;Hydrolase_4;	42.74	9.27	2.36817	up	7.28689e-11	5.96622e-09	yes
TRINITY_DN19901_c0_g1	1919	TRINITY_DN19901_c0_g1_i1	cyclic dof factor 2 [Medicago truncatula]	CDF2	Cyclic dof factor 2 OS=Arabidopsis thaliana GN=CDF2 PE=1 SV=2	GO:0003677(DNA binding);GO:0003700(DNA binding transcription factor activity);GO:0005515(protein binding);GO:0005634(nucleus);GO:0006351(transcription, DNA-templated);GO:0006355(regulation of transcription, DNA-templated);GO:0009908(flower development);GO:0043565(sequence-specific DNA binding);GO:0046872(metal ion binding);GO:0048510(regulation of timing of transition from vegetative to reproduct…	ENOG410YN7N(zinc finger protein)	K16222	Dof zinc finger protein DOF5.5	-	csat04712(Circadian rhythm - plant)	V4TQ22.1 PF02701.13;zf-Dof;	10.91	0.55	4.5242	up	7.40749e-11	6.04712e-09	yes
TRINITY_DN23688_c0_g4	430	TRINITY_DN23688_c0_g4_i1;TRINITY_DN23688_c0_g4_i2;TRINITY_DN23688_c0_g4_i3	protein ENHANCED PSEUDOMONAS SUSCEPTIBILTY 1 [Medicago truncatula]	-	-	-	ENOG410YEZS(Transferase Family)	-	-	-	-	A0A072UP59.1 PF02458.13;Transferase;	585.69	73.9	3.26659	up	8.17262e-11	6.65217e-09	yes
TRINITY_DN20057_c1_g2	1957	TRINITY_DN20057_c1_g2_i1;TRINITY_DN20057_c1_g2_i10;TRINITY_DN20057_c1_g2_i11;TRINITY_DN20057_c1_g2_i12;TRINITY_DN20057_c1_g2_i13;TRINITY_DN20057_c1_g2_i14;TRINITY_DN20057_c1_g2_i15;TRINITY_DN20057_c1_g2_i16;TRINITY_DN20057_c1_g2_i2;TRINITY_DN20057_c1_g2_i3;TRINITY_DN20057_c1_g2_i4;TRINITY_DN20057_c1_g2_i5;TRINITY_DN20057_c1_g2_i6;TRINITY_DN20057_c1_g2_i7;TRINITY_DN20057_c1_g2_i8;TRINITY_DN20057_c…	hypothetical protein LR48_Vigan11g013000 [Vigna angularis]	GPX6	Probable phospholipid hydroperoxide glutathione peroxidase 6, mitochondrial OS=Arabidopsis thaliana GN=GPX6 PE=2 SV=2	GO:0004602(glutathione peroxidase activity);GO:0005739(mitochondrion);GO:0005829(cytosol);GO:0005886(plasma membrane);GO:0006979(response to oxidative stress);GO:0009507(chloroplast);GO:0009651(response to salt stress);GO:0046686(response to cadmium ion);GO:0047066(phospholipid-hydroperoxide glutathione peroxidase activity);GO:0048046(apoplast);GO:0055114(oxidation-reduction process);GO:0098869(c…	COG0386(glutathione peroxidase)	K00432	glutathione peroxidase	EC:1.11.1.9	cam00590(Arachidonic acid metabolism);cam00480(Glutathione metabolism)	G7LI02.2 PF00255.17;GSHPx;	1700.36	368.29	2.55818	up	8.57091e-11	6.95597e-09	yes
TRINITY_DN18117_c0_g1	1444	TRINITY_DN18117_c0_g1_i1;TRINITY_DN18117_c0_g1_i2;TRINITY_DN18117_c0_g1_i3;TRINITY_DN18117_c0_g1_i4;TRINITY_DN18117_c0_g1_i5;TRINITY_DN18117_c0_g1_i6;TRINITY_DN18117_c0_g1_i7	-	-	-	-	-	-	-	-	-	-	293.05	81.57	2.17077	up	9.12023e-11	7.3802e-09	yes
TRINITY_DN19670_c0_g2	600	TRINITY_DN19670_c0_g2_i1	B-box type zinc finger protein [Medicago truncatula]	MIP1A	B-box domain protein 30 OS=Arabidopsis thaliana GN=MIP1A PE=1 SV=1	GO:0005634(nucleus)	ENOG411168W(BBOX)	-	-	-	-	A0A072UJL9.1 PF00643.22;zf-B_box;	34.95	3.21	3.6038	up	1.08548e-10	8.75829e-09	yes
TRINITY_DN19820_c0_g1	812	TRINITY_DN19820_c0_g1_i1;TRINITY_DN19820_c0_g1_i10;TRINITY_DN19820_c0_g1_i11;TRINITY_DN19820_c0_g1_i2;TRINITY_DN19820_c0_g1_i3;TRINITY_DN19820_c0_g1_i4;TRINITY_DN19820_c0_g1_i5;TRINITY_DN19820_c0_g1_i6;TRINITY_DN19820_c0_g1_i7;TRINITY_DN19820_c0_g1_i8;TRINITY_DN19820_c0_g1_i9	RNA-binding (RRM/RBD/RNP motif) family protein [Medicago truncatula]	-	Glycine-rich RNA-binding protein GRP1A OS=Sinapis alba PE=2 SV=1	GO:0000380(alternative mRNA splicing, via spliceosome);GO:0003690(double-stranded DNA binding);GO:0003697(single-stranded DNA binding);GO:0003723(RNA binding);GO:0003729(mRNA binding);GO:0005515(protein binding);GO:0005634(nucleus);GO:0005737(cytoplasm);GO:0005739(mitochondrion);GO:0005777(peroxisome);GO:0005829(cytosol);GO:0006406(mRNA export from nucleus);GO:0006970(response to osmotic stress);…	COG0724(Rna-binding protein)	NA	NA	NA	NA(NA)	G7JHA8.1 PF00076.20;RRM_1;	124.88	1263.62	-3.10042	down	1.09235e-10	8.78822e-09	yes
TRINITY_DN25191_c0_g1	1684	TRINITY_DN25191_c0_g1_i1;TRINITY_DN25191_c0_g1_i2;TRINITY_DN25191_c0_g1_i3;TRINITY_DN25191_c0_g1_i4;TRINITY_DN25191_c0_g1_i5;TRINITY_DN25191_c0_g1_i6;TRINITY_DN25191_c0_g1_i7	uncharacterized protein LOC25480955 [Medicago truncatula]	-	-	GO:0005929(cilium);GO:0030991(intraciliary transport particle A);GO:0035721(intraciliary retrograde transport);GO:0060271(cilium assembly);GO:0061512(protein localization to cilium)	ENOG410XRZ5(NA)	-	-	-	-	D4X3Y7.1 PF14559.4;TPR_19;	4.97	35.02	-2.59506	down	1.0981e-10	8.80895e-09	yes
TRINITY_DN15639_c0_g2	1546	TRINITY_DN15639_c0_g2_i1;TRINITY_DN15639_c0_g2_i2;TRINITY_DN15639_c0_g2_i3	putative triacylglycerol lipase [Medicago truncatula]	At1g29670	GDSL esterase/lipase At1g29670 OS=Arabidopsis thaliana GN=At1g29670 PE=2 SV=1	GO:0016298(lipase activity)	COG3240(GDSL esterase lipase)	NA	NA	NA	NA(NA)	G7L7Z7.1 PF00657.20;Lipase_GDSL;	4.35	34.53	-2.79312	down	1.14528e-10	9.16093e-09	yes
TRINITY_DN23302_c0_g3	1768	TRINITY_DN23302_c0_g3_i1;TRINITY_DN23302_c0_g3_i2;TRINITY_DN23302_c0_g3_i3;TRINITY_DN23302_c0_g3_i4	leucine-rich repeat extensin-like protein 5 [Medicago truncatula]	-	-	GO:0003674(molecular_function);GO:0005634(nucleus);GO:0008150(biological_process)	ENOG410YI4W(Hydroxyproline-rich glycoprotein family protein)	K16903	L-tryptophan---pyruvate aminotransferase	EC:2.6.1.99	sita00380(Tryptophan metabolism)	A0A072VBZ0.1 PF07223.9;DUF1421;	37.18	8.51	2.22509	up	1.15011e-10	9.17313e-09	yes
TRINITY_DN18257_c0_g1	1919	TRINITY_DN18257_c0_g1_i1;TRINITY_DN18257_c0_g1_i2;TRINITY_DN18257_c0_g1_i3;TRINITY_DN18257_c0_g1_i4;TRINITY_DN18257_c0_g1_i5;TRINITY_DN18257_c0_g1_i6;TRINITY_DN18257_c0_g1_i7;TRINITY_DN18257_c0_g1_i8;TRINITY_DN18257_c0_g1_i9	probable serine/threonine-protein kinase PBL3 [Medicago truncatula]	PBL3	Probable serine/threonine-protein kinase PBL3 OS=Arabidopsis thaliana GN=PBL3 PE=1 SV=1	GO:0004675(transmembrane receptor protein serine/threonine kinase activity);GO:0005524(ATP binding);GO:0005634(nucleus);GO:0005737(cytoplasm);GO:0005886(plasma membrane);GO:0006468(protein phosphorylation);GO:0006952(defense response);GO:0007166(cell surface receptor signaling pathway);GO:0009507(chloroplast);GO:0016301(kinase activity)	COG0515(Serine Threonine protein kinase)	NA	NA	NA	NA(NA)	I1JBN3.1 PF07714.15;Pkinase_Tyr;	296.59	67.07	2.30315	up	1.20346e-10	9.57109e-09	yes
TRINITY_DN17598_c0_g1	2148	TRINITY_DN17598_c0_g1_i1;TRINITY_DN17598_c0_g1_i2;TRINITY_DN17598_c0_g1_i3;TRINITY_DN17598_c0_g1_i4;TRINITY_DN17598_c0_g1_i5;TRINITY_DN17598_c0_g1_i6;TRINITY_DN17598_c0_g1_i7	uncharacterized protein LOC11431960 isoform X1 [Medicago truncatula]	-	-	GO:0003674(molecular_function);GO:0005634(nucleus);GO:0008150(biological_process)	ENOG4111C5Y(NA)	-	-	-	-	B9RP40.1 PF10358.7;NT-C2;	18.08	1.51	3.52755	up	1.22232e-10	9.69332e-09	yes
TRINITY_DN22957_c1_g1	2088	TRINITY_DN22957_c1_g1_i1;TRINITY_DN22957_c1_g1_i2;TRINITY_DN22957_c1_g1_i3;TRINITY_DN22957_c1_g1_i4;TRINITY_DN22957_c1_g1_i5;TRINITY_DN22957_c1_g1_i6;TRINITY_DN22957_c1_g1_i7	F-box/kelch-repeat protein At1g67480 [Medicago truncatula]	At1g67480	F-box/kelch-repeat protein At1g67480 OS=Arabidopsis thaliana GN=At1g67480 PE=2 SV=1	GO:0004842(ubiquitin-protein transferase activity);GO:0031463(Cul3-RING ubiquitin ligase complex)	ENOG4110X8D(Kelch repeat-containing F-box family protein)	K14308	nuclear pore complex protein Nup54	-	bna03013(RNA transport)	K7MP99.1 PF07646.13;Kelch_2;	348.24	78.41	2.31111	up	1.25816e-10	9.94914e-09	yes
TRINITY_DN23242_c0_g1	2649	TRINITY_DN23242_c0_g1_i1;TRINITY_DN23242_c0_g1_i2;TRINITY_DN23242_c0_g1_i3;TRINITY_DN23242_c0_g1_i4;TRINITY_DN23242_c0_g1_i5;TRINITY_DN23242_c0_g1_i6;TRINITY_DN23242_c0_g1_i7;TRINITY_DN23242_c0_g1_i8	U-box domain-containing protein 17 [Medicago truncatula]	PUB17	U-box domain-containing protein 17 OS=Arabidopsis thaliana GN=PUB17 PE=2 SV=1	GO:0005634(nucleus);GO:0005737(cytoplasm)	ENOG410YC2C(Ubox domain-containing protein)	NA	NA	NA	NA(NA)	V4MQG3.1 PF04826.11;Arm_2;	38.6	10.13	2.09848	up	1.43793e-10	1.13384e-08	yes
TRINITY_DN22355_c0_g2	2095	TRINITY_DN22355_c0_g2_i1;TRINITY_DN22355_c0_g2_i10;TRINITY_DN22355_c0_g2_i11;TRINITY_DN22355_c0_g2_i12;TRINITY_DN22355_c0_g2_i13;TRINITY_DN22355_c0_g2_i14;TRINITY_DN22355_c0_g2_i15;TRINITY_DN22355_c0_g2_i2;TRINITY_DN22355_c0_g2_i3;TRINITY_DN22355_c0_g2_i4;TRINITY_DN22355_c0_g2_i5;TRINITY_DN22355_c0_g2_i6;TRINITY_DN22355_c0_g2_i7;TRINITY_DN22355_c0_g2_i8;TRINITY_DN22355_c0_g2_i9	aspartyl protease family protein 1 [Medicago truncatula]	APF1	Aspartyl protease family protein 1 OS=Arabidopsis thaliana GN=APF1 PE=1 SV=1	GO:0004190(aspartic-type endopeptidase activity);GO:0006508(proteolysis);GO:0030163(protein catabolic process)	ENOG410XNV7(aspartic)	-	-	-	-	G7JXM9.1 PF14543.4;TAXi_N;	146.78	27.06	2.63482	up	1.45108e-10	1.14097e-08	yes
TRINITY_DN12578_c0_g1	1249	TRINITY_DN12578_c0_g1_i1;TRINITY_DN12578_c0_g1_i2	glucan endo-1,3-beta-glucosidase 14 [Medicago truncatula]	At2g27500	Glucan endo-1,3-beta-glucosidase 14 OS=Arabidopsis thaliana GN=At2g27500 PE=1 SV=2	GO:0004553(hydrolase activity, hydrolyzing O-glycosyl compounds);GO:0030247(polysaccharide binding);GO:0046658(anchored component of plasma membrane)	ENOG410Y94B(glucan endo-1-3-beta-glucosidase)	K19891	glucan endo-1,3-beta-glucosidase 1/2/3	EC:3.2.1.39	smo00500(Starch and sucrose metabolism)	G7J7A1.2 PF00332.16;Glyco_hydro_17;	13.95	1.36	3.52337	up	1.48562e-10	1.16365e-08	yes
TRINITY_DN19124_c0_g1	1682	TRINITY_DN19124_c0_g1_i1;TRINITY_DN19124_c0_g1_i2;TRINITY_DN19124_c0_g1_i3;TRINITY_DN19124_c0_g1_i4;TRINITY_DN19124_c0_g1_i5;TRINITY_DN19124_c0_g1_i6;TRINITY_DN19124_c0_g1_i7	unknown [Medicago truncatula]	HAT4	Homeobox-leucine zipper protein HAT4 OS=Arabidopsis thaliana GN=HAT4 PE=1 SV=1	GO:0003677(DNA binding);GO:0003700(DNA binding transcription factor activity);GO:0005515(protein binding);GO:0005634(nucleus);GO:0006351(transcription, DNA-templated);GO:0006355(regulation of transcription, DNA-templated);GO:0008283(cell proliferation);GO:0009585(red, far-red light phototransduction);GO:0009641(shade avoidance);GO:0009733(response to auxin);GO:0009735(response to cytokinin);GO:00…	ENOG410Z2UE(homeobox-leucine zipper protein)	NA	NA	NA	NA(NA)	A0A072UDF7.1 PF04618.10;HD-ZIP_N;	106.72	28.36	2.13366	up	1.48831e-10	1.16365e-08	yes
TRINITY_DN21978_c0_g1	1906	TRINITY_DN21978_c0_g1_i1;TRINITY_DN21978_c0_g1_i10;TRINITY_DN21978_c0_g1_i11;TRINITY_DN21978_c0_g1_i12;TRINITY_DN21978_c0_g1_i13;TRINITY_DN21978_c0_g1_i14;TRINITY_DN21978_c0_g1_i15;TRINITY_DN21978_c0_g1_i16;TRINITY_DN21978_c0_g1_i17;TRINITY_DN21978_c0_g1_i18;TRINITY_DN21978_c0_g1_i19;TRINITY_DN21978_c0_g1_i2;TRINITY_DN21978_c0_g1_i20;TRINITY_DN21978_c0_g1_i3;TRINITY_DN21978_c0_g1_i4;TRINITY_DN219…	uncharacterized protein C24B11.05 [Medicago truncatula]	-	-	GO:0005634(nucleus);GO:0016787(hydrolase activity)	COG1011(Hydrolase)	NA	NA	NA	NA(NA)	R0EZY6.1 PF13419.4;HAD_2;	59.93	12.69	2.37373	up	1.53541e-10	1.1971e-08	yes
TRINITY_DN12544_c0_g1	1156	TRINITY_DN12544_c0_g1_i1;TRINITY_DN12544_c0_g1_i10;TRINITY_DN12544_c0_g1_i11;TRINITY_DN12544_c0_g1_i2;TRINITY_DN12544_c0_g1_i3;TRINITY_DN12544_c0_g1_i4;TRINITY_DN12544_c0_g1_i5;TRINITY_DN12544_c0_g1_i6;TRINITY_DN12544_c0_g1_i7;TRINITY_DN12544_c0_g1_i8;TRINITY_DN12544_c0_g1_i9	pirin-like protein 2 isoform X1 [Medicago truncatula]	PRN2	Pirin-like protein 2 OS=Arabidopsis thaliana GN=PRN2 PE=1 SV=3	GO:0005515(protein binding);GO:0005516(calmodulin binding);GO:0005634(nucleus);GO:0005829(cytosol);GO:0005886(plasma membrane);GO:0030414(peptidase inhibitor activity);GO:0042742(defense response to bacterium);GO:0046872(metal ion binding)	COG1741(pirin domain protein)	NA	NA	NA	NA(NA)	A0A072U6J3.1 PF05726.11;Pirin_C;	93.88	21.83	2.18658	up	1.61004e-10	1.25178e-08	yes
TRINITY_DN24469_c0_g1	2661	TRINITY_DN24469_c0_g1_i1;TRINITY_DN24469_c0_g1_i10;TRINITY_DN24469_c0_g1_i11;TRINITY_DN24469_c0_g1_i2;TRINITY_DN24469_c0_g1_i3;TRINITY_DN24469_c0_g1_i4;TRINITY_DN24469_c0_g1_i5;TRINITY_DN24469_c0_g1_i6;TRINITY_DN24469_c0_g1_i7;TRINITY_DN24469_c0_g1_i8;TRINITY_DN24469_c0_g1_i9	putative transcription regulator mTERF family [Medicago truncatula]	MTERF2	Transcription termination factor MTERF2, chloroplastic OS=Arabidopsis thaliana GN=MTERF2 PE=3 SV=1	GO:0003727(single-stranded RNA binding);GO:0005739(mitochondrion);GO:0008380(RNA splicing);GO:0009506(plasmodesma);GO:0009507(chloroplast);GO:0009658(chloroplast organization);GO:0009793(embryo development ending in seed dormancy);GO:0019843(rRNA binding);GO:0032502(developmental process);GO:0042255(ribosome assembly)	ENOG410XT49(mitochondrial transcription termination)	NA	NA	NA	NA(NA)	G7JG65.1 PF02536.12;mTERF;	2.07	14.71	-2.82832	down	1.61931e-10	1.25546e-08	yes
TRINITY_DN12984_c0_g1	2534	TRINITY_DN12984_c0_g1_i1	probable 1-deoxy-D-xylulose-5-phosphate synthase 2, chloroplastic [Medicago truncatula]	Os07g0190000	Probable 1-deoxy-D-xylulose-5-phosphate synthase 2, chloroplastic OS=Oryza sativa subsp. japonica GN=Os07g0190000 PE=2 SV=1	GO:0005515(protein binding);GO:0008661(1-deoxy-D-xylulose-5-phosphate synthase activity);GO:0009228(thiamine biosynthetic process);GO:0009507(chloroplast);GO:0009570(chloroplast stroma);GO:0015995(chlorophyll biosynthetic process);GO:0016114(terpenoid biosynthetic process);GO:0019288(isopentenyl diphosphate biosynthetic process, methylerythritol 4-phosphate pathway);GO:0046872(metal ion binding);…	COG1154(Catalyzes the acyloin condensation reaction between C atoms 2 and 3 of pyruvate and glyceraldehyde 3-phosphate to yield 1-deoxy-D-xylulose-5-phosphate (DXP) (By similarity))	K01662	1-deoxy-D-xylulose-5-phosphate synthase	EC:2.2.1.7	mtr00730(Thiamine metabolism);mtr00900(Terpenoid backbone biosynthesis)	A7DY38.1 PF13292.4;DXP_synthase_N;	30.01	1.36	4.60824	up	1.71017e-10	1.32221e-08	yes
TRINITY_DN20427_c1_g4	2397	TRINITY_DN20427_c1_g4_i1;TRINITY_DN20427_c1_g4_i2;TRINITY_DN20427_c1_g4_i3	WRKY transcription factor WRKY108715 [Medicago truncatula]	WRKY24	WRKY transcription factor WRKY24 OS=Oryza sativa subsp. japonica GN=WRKY24 PE=2 SV=1	GO:0003700(DNA binding transcription factor activity);GO:0005515(protein binding);GO:0005634(nucleus);GO:0006351(transcription, DNA-templated);GO:0006355(regulation of transcription, DNA-templated);GO:0006970(response to osmotic stress);GO:0009408(response to heat);GO:0009409(response to cold);GO:0009414(response to water deprivation);GO:0009651(response to salt stress);GO:0010120(camalexin biosy…	-	K13424	WRKY transcription factor 33	-	mtr04016(MAPK signaling pathway - plant);mtr04626(Plant-pathogen interaction)	I1N342.1 PF03106.13;WRKY;	49.97	6.74	3.076	up	1.71748e-10	1.32418e-08	yes
TRINITY_DN16511_c0_g3	580	TRINITY_DN16511_c0_g3_i1	-	-	-	-	-	-	-	-	-	-	9.26	0.09	6.68379	up	2.0855e-10	1.60347e-08	yes
TRINITY_DN20346_c0_g1	1872	TRINITY_DN20346_c0_g1_i1;TRINITY_DN20346_c0_g1_i10;TRINITY_DN20346_c0_g1_i2;TRINITY_DN20346_c0_g1_i3;TRINITY_DN20346_c0_g1_i4;TRINITY_DN20346_c0_g1_i5;TRINITY_DN20346_c0_g1_i6;TRINITY_DN20346_c0_g1_i7;TRINITY_DN20346_c0_g1_i8;TRINITY_DN20346_c0_g1_i9	senescence/dehydration-associated-like protein [Medicago truncatula]	ERD7	Protein EARLY-RESPONSIVE TO DEHYDRATION 7, chloroplastic OS=Arabidopsis thaliana GN=ERD7 PE=1 SV=1	GO:0003674(molecular_function);GO:0005737(cytoplasm);GO:0005886(plasma membrane);GO:0007623(circadian rhythm);GO:0009409(response to cold);GO:0009414(response to water deprivation);GO:0009507(chloroplast);GO:0009644(response to high light intensity);GO:0009651(response to salt stress);GO:0009737(response to abscisic acid)	-	K19366	spartin	-	mtr04144(Endocytosis)	A0A072UN80.1 PF06911.10;Senescence;	88.61	17.23	2.52061	up	2.19128e-10	1.68015e-08	yes
TRINITY_DN13331_c0_g1	1953	TRINITY_DN13331_c0_g1_i1;TRINITY_DN13331_c0_g1_i2	polyol transporter 5 [Medicago truncatula]	PLT5	Polyol transporter 5 OS=Arabidopsis thaliana GN=PLT5 PE=1 SV=2	GO:0005351(carbohydrate:proton symporter activity);GO:0005355(glucose transmembrane transporter activity);GO:0005887(integral component of plasma membrane);GO:0046323(glucose import)	ENOG410XNQK(Transporter)	NA	NA	NA	NA(NA)	G7KPV5.1 PF00083.22;Sugar_tr;	24.34	4.79	2.51591	up	2.26082e-10	1.72868e-08	yes
TRINITY_DN22596_c0_g1	2250	TRINITY_DN22596_c0_g1_i1;TRINITY_DN22596_c0_g1_i2;TRINITY_DN22596_c0_g1_i3;TRINITY_DN22596_c0_g1_i4;TRINITY_DN22596_c0_g1_i5;TRINITY_DN22596_c0_g1_i6;TRINITY_DN22596_c0_g1_i7	WNK kinase [Medicago truncatula]	WNK6	Probable serine/threonine-protein kinase WNK6 OS=Arabidopsis thaliana GN=WNK6 PE=2 SV=1	GO:0004674(protein serine/threonine kinase activity);GO:0005829(cytosol);GO:0006468(protein phosphorylation);GO:0035556(intracellular signal transduction)	ENOG410XQWZ(WNK lysine deficient protein kinase)	NA	NA	NA	NA(NA)	A0A067F4G7.1 PF00069.23;Pkinase;	2.12	11.15	-2.90628	down	2.29792e-10	1.75222e-08	yes
TRINITY_DN18431_c0_g2	1282	TRINITY_DN18431_c0_g2_i1;TRINITY_DN18431_c0_g2_i2;TRINITY_DN18431_c0_g2_i3;TRINITY_DN18431_c0_g2_i4;TRINITY_DN18431_c0_g2_i5;TRINITY_DN18431_c0_g2_i6;TRINITY_DN18431_c0_g2_i7	hypothetical protein TSUD_211470, partial [Trifolium subterraneum]	PPA5	Soluble inorganic pyrophosphatase 5 OS=Arabidopsis thaliana GN=PPA5 PE=2 SV=1	GO:0000287(magnesium ion binding);GO:0004427(inorganic diphosphatase activity);GO:0005737(cytoplasm);GO:0005829(cytosol);GO:0006796(phosphate-containing compound metabolic process);GO:0016020(membrane);GO:0016462(pyrophosphatase activity)	COG0221(Pyrophosphate phospho-hydrolase)	K01507	inorganic pyrophosphatase	EC:3.6.1.1	mtr00190(Oxidative phosphorylation)	D8R4C4.1 PF00719.17;Pyrophosphatase;	12.41	71.57	-2.30695	down	2.36704e-10	1.79998e-08	yes
TRINITY_DN25067_c1_g3	1814	TRINITY_DN25067_c1_g3_i1;TRINITY_DN25067_c1_g3_i2;TRINITY_DN25067_c1_g3_i3;TRINITY_DN25067_c1_g3_i4	transcription factor bHLH18 [Medicago truncatula]	BHLH25	Transcription factor bHLH25 OS=Arabidopsis thaliana GN=BHLH25 PE=2 SV=2	GO:0003677(DNA binding);GO:0003700(DNA binding transcription factor activity);GO:0005634(nucleus);GO:0006351(transcription, DNA-templated);GO:0006355(regulation of transcription, DNA-templated);GO:0046983(protein dimerization activity)	ENOG410YG6S(Transcription factor)	K13422	transcription factor MYC2	-	gra04016(MAPK signaling pathway - plant);gra04075(Plant hormone signal transduction)	V7CIG1.1 PF00010.24;HLH;	255.1	32.03	3.12683	up	2.77379e-10	2.10353e-08	yes
TRINITY_DN24624_c0_g4	1290	TRINITY_DN24624_c0_g4_i1	gibberellin 2-beta-dioxygenase 8 [Medicago truncatula]	GA2OX8	Gibberellin 2-beta-dioxygenase 8 OS=Arabidopsis thaliana GN=GA2OX8 PE=1 SV=2	GO:0009685(gibberellin metabolic process);GO:0052635(C-20 gibberellin 2-beta-dioxygenase activity)	COG3491(2OGFe(II) oxygenase)	K04125	gibberellin 2-oxidase	EC:1.14.11.13	mtr00904(Diterpenoid biosynthesis)	Q2HSM4.1 PF14226.4;DIOX_N;	4.82	0	10.1778	up	3.35295e-10	2.53581e-08	yes
TRINITY_DN18995_c0_g1	1785	TRINITY_DN18995_c0_g1_i1;TRINITY_DN18995_c0_g1_i2;TRINITY_DN18995_c0_g1_i3;TRINITY_DN18995_c0_g1_i4;TRINITY_DN18995_c0_g1_i5;TRINITY_DN18995_c0_g1_i6;TRINITY_DN18995_c0_g1_i7;TRINITY_DN18995_c0_g1_i8	NAC3 [Medicago falcata]	NAC019	NAC domain-containing protein 19 OS=Arabidopsis thaliana GN=NAC019 PE=1 SV=1	GO:0003677(DNA binding);GO:0003700(DNA binding transcription factor activity);GO:0005515(protein binding);GO:0005634(nucleus);GO:0006351(transcription, DNA-templated);GO:0006355(regulation of transcription, DNA-templated);GO:0007275(multicellular organism development);GO:0009414(response to water deprivation)	ENOG4111FG3(nac domain)	NA	NA	NA	NA(NA)	E0CSQ1.1 PF02365.13;NAM;	16.53	1.58	3.67996	up	3.5515e-10	2.67868e-08	yes
TRINITY_DN20170_c0_g3	1822	TRINITY_DN20170_c0_g3_i1;TRINITY_DN20170_c0_g3_i2;TRINITY_DN20170_c0_g3_i3;TRINITY_DN20170_c0_g3_i4;TRINITY_DN20170_c0_g3_i5	glucan endo-1,3-beta-glucosidase 14 [Medicago truncatula]	At2g27500	Glucan endo-1,3-beta-glucosidase 14 OS=Arabidopsis thaliana GN=At2g27500 PE=1 SV=2	GO:0004553(hydrolase activity, hydrolyzing O-glycosyl compounds);GO:0030247(polysaccharide binding);GO:0046658(anchored component of plasma membrane)	ENOG410YA4N(glucan endo-1-3-beta-glucosidase)	K19892	glucan endo-1,3-beta-glucosidase 4	EC:3.2.1.39	dct00500(Starch and sucrose metabolism)	G7ITT7.2 PF00332.16;Glyco_hydro_17;	51.43	10.92	2.51674	up	3.83706e-10	2.88622e-08	yes
TRINITY_DN17164_c1_g2	2218	TRINITY_DN17164_c1_g2_i1	molybdenum cofactor sulfurase [Medicago truncatula]	FLACCA	Molybdenum cofactor sulfurase OS=Solanum lycopersicum GN=FLACCA PE=2 SV=1	GO:0016740(transferase activity)	COG0520(cysteine desulfurase)	K15631	molybdenum cofactor sulfurtransferase	EC:2.8.1.9	ghi00790(Folate biosynthesis)	A0A072VPL2.1 PF00266.17;Aminotran_5;	19.97	3.44	2.70015	up	4.00029e-10	2.99858e-08	yes
TRINITY_DN25759_c1_g1	1717	TRINITY_DN25759_c1_g1_i1;TRINITY_DN25759_c1_g1_i10;TRINITY_DN25759_c1_g1_i2;TRINITY_DN25759_c1_g1_i3;TRINITY_DN25759_c1_g1_i4;TRINITY_DN25759_c1_g1_i5;TRINITY_DN25759_c1_g1_i6;TRINITY_DN25759_c1_g1_i7;TRINITY_DN25759_c1_g1_i8;TRINITY_DN25759_c1_g1_i9	3-oxo-Delta(4,5)-steroid 5-beta-reductase [Medicago truncatula]	VEP1	3-oxo-Delta(4,5)-steroid 5-beta-reductase OS=Arabidopsis thaliana GN=VEP1 PE=1 SV=1	GO:0005829(cytosol);GO:0008202(steroid metabolic process);GO:0009611(response to wounding);GO:0010051(xylem and phloem pattern formation);GO:0035671(enone reductase activity);GO:0047787(delta4-3-oxosteroid 5beta-reductase activity);GO:0055114(oxidation-reduction process)	ENOG410XPIJ(epimerase dehydratase)	K01184	polygalacturonase	EC:3.2.1.15	egr00040(Pentose and glucuronate interconversions)	V7ASV6.1 PF01370.19;Epimerase;	214.22	54.25	2.41053	up	4.00805e-10	2.99858e-08	yes
TRINITY_DN24399_c1_g1	1359	TRINITY_DN24399_c1_g1_i1;TRINITY_DN24399_c1_g1_i10;TRINITY_DN24399_c1_g1_i11;TRINITY_DN24399_c1_g1_i12;TRINITY_DN24399_c1_g1_i13;TRINITY_DN24399_c1_g1_i14;TRINITY_DN24399_c1_g1_i15;TRINITY_DN24399_c1_g1_i16;TRINITY_DN24399_c1_g1_i17;TRINITY_DN24399_c1_g1_i18;TRINITY_DN24399_c1_g1_i19;TRINITY_DN24399_c1_g1_i2;TRINITY_DN24399_c1_g1_i20;TRINITY_DN24399_c1_g1_i21;TRINITY_DN24399_c1_g1_i22;TRINITY_DN2…	transmembrane protein, putative [Medicago truncatula]	-	-	-	-	NA	NA	NA	NA(NA)	-	85.66	5.56	3.46355	up	4.32906e-10	3.23003e-08	yes
TRINITY_DN11146_c0_g1	827	TRINITY_DN11146_c0_g1_i1	uncharacterized protein LOC11444718 [Medicago truncatula]	-	-	-	-	-	-	-	-	-	31.67	0.77	5.45121	up	4.76596e-10	3.54649e-08	yes
TRINITY_DN24211_c0_g1	1019	TRINITY_DN24211_c0_g1_i1;TRINITY_DN24211_c0_g1_i2;TRINITY_DN24211_c0_g1_i3;TRINITY_DN24211_c0_g1_i4;TRINITY_DN24211_c0_g1_i5	unknown [Medicago truncatula]	DNAJ1	DnaJ protein homolog OS=Cucumis sativus GN=DNAJ1 PE=2 SV=1	GO:0005634(nucleus)	COG0484(ATP binding to DnaK triggers the release of the substrate protein, thus completing the reaction cycle. Several rounds of ATP-dependent interactions between DnaJ, DnaK and GrpE are required for fully efficient folding. Also involved, together with DnaK and GrpE, in the DNA replication of plasmids through activation of initiation proteins (By similarity))	K09503	DnaJ homolog subfamily A member 2	-	mtr04141(Protein processing in endoplasmic reticulum)	A0A0J8E591.1 PF01556.16;DnaJ_C;	278.68	71.64	2.16915	up	4.95384e-10	3.67644e-08	yes
TRINITY_DN23372_c1_g1	641	TRINITY_DN23372_c1_g1_i1;TRINITY_DN23372_c1_g1_i2	unknown [Medicago truncatula]	SAP5	Zinc finger A20 and AN1 domain-containing stress-associated protein 5 OS=Arabidopsis thaliana GN=SAP5 PE=2 SV=1	GO:0003677(DNA binding);GO:0004842(ubiquitin-protein transferase activity);GO:0005634(nucleus);GO:0006970(response to osmotic stress);GO:0008270(zinc ion binding);GO:0009414(response to water deprivation);GO:0016567(protein ubiquitination);GO:0051865(protein autoubiquitination)	ENOG4111UWC(zinc finger)	-	-	-	-	G7LEG3.1 PF01428.14;zf-AN1;	263.25	67.6	2.15701	up	4.97284e-10	3.6807e-08	yes
TRINITY_DN14204_c0_g3	373	TRINITY_DN14204_c0_g3_i1;TRINITY_DN14204_c0_g3_i2	cysteine-rich TM module stress tolerance protein [Medicago truncatula]	-	-	-	ENOG410ZBZ5(NA)	-	-	-	-	G7IH42.1 PF12734.5;CYSTM;	301.68	80.85	2.19211	up	5.72089e-10	4.22311e-08	yes
TRINITY_DN17918_c0_g3	1445	TRINITY_DN17918_c0_g3_i1;TRINITY_DN17918_c0_g3_i2;TRINITY_DN17918_c0_g3_i3;TRINITY_DN17918_c0_g3_i4	putative adenylate kinase [Medicago truncatula]	At3g01820	Probable adenylate kinase 7, mitochondrial OS=Arabidopsis thaliana GN=At3g01820 PE=2 SV=1	GO:0004017(adenylate kinase activity);GO:0005524(ATP binding);GO:0005739(mitochondrion);GO:0046939(nucleotide phosphorylation)	COG0563(Catalyzes the reversible transfer of the terminal phosphate group between ATP and AMP. Plays an important role in cellular energy homeostasis and in adenine nucleotide metabolism (By similarity))	K00939	adenylate kinase	EC:2.7.4.3	cam00230(Purine metabolism);cam00730(Thiamine metabolism)	I1MLK6.1 PF00406.20;ADK;	65.57	15.84	2.19666	up	5.98692e-10	4.40777e-08	yes
TRINITY_DN18932_c0_g3	1405	TRINITY_DN18932_c0_g3_i1;TRINITY_DN18932_c0_g3_i10;TRINITY_DN18932_c0_g3_i11;TRINITY_DN18932_c0_g3_i12;TRINITY_DN18932_c0_g3_i13;TRINITY_DN18932_c0_g3_i2;TRINITY_DN18932_c0_g3_i3;TRINITY_DN18932_c0_g3_i4;TRINITY_DN18932_c0_g3_i5;TRINITY_DN18932_c0_g3_i6;TRINITY_DN18932_c0_g3_i7;TRINITY_DN18932_c0_g3_i8;TRINITY_DN18932_c0_g3_i9	stem-specific TSJT1-like protein [Medicago truncatula]	TSJT1	Stem-specific protein TSJT1 OS=Nicotiana tabacum GN=TSJT1 PE=2 SV=1	GO:0004066(asparagine synthase (glutamine-hydrolyzing) activity);GO:0005829(cytosol);GO:0006529(asparagine biosynthetic process);GO:0006541(glutamine metabolic process);GO:0042803(protein homodimerization activity)	ENOG410YD56(Stem-specific protein)	NA	NA	NA	NA(NA)	A0A072VBF6.1 PF12481.6;DUF3700;	22.74	112.72	-2.34257	down	6.21497e-10	4.56356e-08	yes
TRINITY_DN25861_c0_g1	1669	TRINITY_DN25861_c0_g1_i1;TRINITY_DN25861_c0_g1_i2;TRINITY_DN25861_c0_g1_i3;TRINITY_DN25861_c0_g1_i4;TRINITY_DN25861_c0_g1_i5	polygalacturonase non-catalytic subunit AroGP2 [Medicago truncatula]	PGL3	Polygalacturonase 1 beta-like protein 3 OS=Arabidopsis thaliana GN=PGL3 PE=2 SV=2	GO:0004650(polygalacturonase activity);GO:0005576(extracellular region);GO:0005618(cell wall);GO:0008150(biological_process);GO:0048046(apoplast)	ENOG410YDAC(Noncatalytic subunit)	-	-	-	-	A0A072TRI5.1 PF03181.13;BURP;	7.16	76.33	-3.23892	down	6.23213e-10	4.56409e-08	yes
TRINITY_DN15021_c0_g2	726	TRINITY_DN15021_c0_g2_i1	dehydration-responsive element-binding protein 1B-like [Cicer arietinum]	DREB1B	Dehydration-responsive element-binding protein 1B OS=Arabidopsis thaliana GN=DREB1B PE=2 SV=2	GO:0003677(DNA binding);GO:0003700(DNA binding transcription factor activity);GO:0005515(protein binding);GO:0005634(nucleus);GO:0006351(transcription, DNA-templated);GO:0009409(response to cold);GO:0009414(response to water deprivation);GO:0009631(cold acclimation);GO:0045893(positive regulation of transcription, DNA-templated)	-	NA	NA	NA	NA(NA)	I1LZG3.2 PF00847.18;AP2;	20.22	0.04	8.74033	up	6.27036e-10	4.58e-08	yes
TRINITY_DN14871_c1_g1	1770	TRINITY_DN14871_c1_g1_i1;TRINITY_DN14871_c1_g1_i2;TRINITY_DN14871_c1_g1_i3;TRINITY_DN14871_c1_g1_i4	hypothetical protein L195_g028956 [Trifolium pratense]	At4g29420	F-box/LRR-repeat protein At4g29420 OS=Arabidopsis thaliana GN=At4g29420 PE=2 SV=1	GO:0003674(molecular_function);GO:0005634(nucleus);GO:0008150(biological_process)	ENOG410YATG(F-box LRR-repeat protein)	-	-	-	-	M0TH96.1 PF00646.31;F-box;	34.34	7.75	2.25785	up	6.46008e-10	4.7062e-08	yes
TRINITY_DN12519_c0_g2	605	TRINITY_DN12519_c0_g2_i1;TRINITY_DN12519_c0_g2_i2	unknown [Medicago truncatula]	-	-	-	ENOG410Z2IC(NA)	-	-	-	-	-	121.56	27.1	2.39694	up	6.67154e-10	4.84752e-08	yes
TRINITY_DN14733_c0_g3	1154	TRINITY_DN14733_c0_g3_i1;TRINITY_DN14733_c0_g3_i2;TRINITY_DN14733_c0_g3_i3;TRINITY_DN14733_c0_g3_i4;TRINITY_DN14733_c0_g3_i5;TRINITY_DN14733_c0_g3_i6;TRINITY_DN14733_c0_g3_i7;TRINITY_DN14733_c0_g3_i8;TRINITY_DN14733_c0_g3_i9	bidirectional sugar transporter SWEET2-like [Medicago truncatula]	SWEET2	Bidirectional sugar transporter SWEET2 OS=Arabidopsis thaliana GN=SWEET2 PE=1 SV=1	GO:0008643(carbohydrate transport);GO:0016021(integral component of membrane);GO:0051119(sugar transmembrane transporter activity)	ENOG4111M4R(sugar transporter)	NA	NA	NA	NA(NA)	A0A072VAA6.1 PF03083.14;MtN3_slv;	127.44	23.26	2.61268	up	6.75685e-10	4.89669e-08	yes
TRINITY_DN20124_c0_g1	1108	TRINITY_DN20124_c0_g1_i1;TRINITY_DN20124_c0_g1_i2;TRINITY_DN20124_c0_g1_i3;TRINITY_DN20124_c0_g1_i4;TRINITY_DN20124_c0_g1_i5;TRINITY_DN20124_c0_g1_i6	zinc finger protein CONSTANS-LIKE 4 [Medicago truncatula]	-	-	GO:0003700(DNA binding transcription factor activity);GO:0005622(intracellular);GO:0005634(nucleus);GO:0006355(regulation of transcription, DNA-templated);GO:0008270(zinc ion binding)	ENOG410YSB4(zinc finger)	-	-	-	-	A0A022PWH4.1 PF00643.22;zf-B_box;	131.15	32.24	2.21151	up	6.90262e-10	4.9893e-08	yes
TRINITY_DN17588_c0_g1	298	TRINITY_DN17588_c0_g1_i1	-	-	-	-	-	-	-	-	-	-	58.84	1.44	5.60031	up	6.93851e-10	5.00222e-08	yes
TRINITY_DN18089_c0_g1	1417	TRINITY_DN18089_c0_g1_i1;TRINITY_DN18089_c0_g1_i2;TRINITY_DN18089_c0_g1_i3;TRINITY_DN18089_c0_g1_i4	aldose 1-epimerase isoform X1 [Medicago truncatula]	GALM	Aldose 1-epimerase OS=Bos taurus GN=GALM PE=2 SV=1	GO:0004034(aldose 1-epimerase activity);GO:0005737(cytoplasm);GO:0006006(glucose metabolic process);GO:0006012(galactose metabolic process);GO:0030246(carbohydrate binding)	COG2017(converts alpha-aldose to the beta-anomer. It is active on D-glucose, L-arabinose, D-xylose, D-galactose, maltose and lactose (By similarity))	K01785	aldose 1-epimerase	EC:5.1.3.3	mtr00010(Glycolysis / Gluconeogenesis);mtr00052(Galactose metabolism)	A0A072U7A5.1 PF01263.18;Aldose_epim;	3.21	24.73	-2.77538	down	7.12955e-10	5.12663e-08	yes
TRINITY_DN21806_c1_g3	1546	TRINITY_DN21806_c1_g3_i1	cyclic dof factor 1 [Medicago truncatula]	CDF1	Cyclic dof factor 1 OS=Arabidopsis thaliana GN=CDF1 PE=1 SV=2	GO:0000978(RNA polymerase II proximal promoter sequence-specific DNA binding);GO:0003677(DNA binding);GO:0003700(DNA binding transcription factor activity);GO:0005515(protein binding);GO:0005634(nucleus);GO:0006351(transcription, DNA-templated);GO:0006355(regulation of transcription, DNA-templated);GO:0009658(chloroplast organization);GO:0009908(flower development);GO:0010228(vegetative to reprod…	-	K16222	Dof zinc finger protein DOF5.5	-	bna04712(Circadian rhythm - plant)	G7KGL7.1 PF02701.13;zf-Dof;	17.58	1.6	3.64655	up	7.23634e-10	5.18997e-08	yes
TRINITY_DN19013_c0_g3	1343	TRINITY_DN19013_c0_g3_i1;TRINITY_DN19013_c0_g3_i2;TRINITY_DN19013_c0_g3_i3;TRINITY_DN19013_c0_g3_i4;TRINITY_DN19013_c0_g3_i5	heat stress transcription factor C-1 [Medicago truncatula]	HSFC1	Heat stress transcription factor C-1 OS=Arabidopsis thaliana GN=HSFC1 PE=2 SV=1	GO:0003677(DNA binding);GO:0003700(DNA binding transcription factor activity);GO:0005515(protein binding);GO:0005634(nucleus);GO:0006351(transcription, DNA-templated);GO:0006355(regulation of transcription, DNA-templated);GO:0043565(sequence-specific DNA binding);GO:0061408(positive regulation of transcription from RNA polymerase II promoter in response to heat stress)	COG5169(Transcription factor)	NA	NA	NA	NA(NA)	A0A072UBW9.1 PF00447.15;HSF_DNA-bind;	58.02	8.46	3.00088	up	7.38771e-10	5.28488e-08	yes
TRINITY_DN19780_c0_g1	2160	TRINITY_DN19780_c0_g1_i1;TRINITY_DN19780_c0_g1_i2;TRINITY_DN19780_c0_g1_i3;TRINITY_DN19780_c0_g1_i4;TRINITY_DN19780_c0_g1_i5;TRINITY_DN19780_c0_g1_i6;TRINITY_DN19780_c0_g1_i7;TRINITY_DN19780_c0_g1_i8	uncharacterized protein LOC25485619 isoform X1 [Medicago truncatula]	-	-	GO:0003682(chromatin binding);GO:0005634(nucleus);GO:0007064(mitotic sister chromatid cohesion);GO:0010468(regulation of gene expression);GO:0071169(establishment of protein localization to chromatin);GO:0080167(response to karrikin)	ENOG410Z5M3(NA)	K12868	pre-mRNA-splicing factor SYF2	-	tcc03040(Spliceosome)	A0A072W2B7.1 PF05278.10;PEARLI-4;	61.17	16.04	2.02005	up	7.60496e-10	5.4263e-08	yes
TRINITY_DN16393_c0_g2	3942	TRINITY_DN16393_c0_g2_i1;TRINITY_DN16393_c0_g2_i2;TRINITY_DN16393_c0_g2_i3	putative phospholipid-transporting ATPase 9 [Medicago truncatula]	ALA9	Putative phospholipid-transporting ATPase 9 OS=Arabidopsis thaliana GN=ALA9 PE=3 SV=1	GO:0004012(phospholipid-translocating ATPase activity);GO:0005802(trans-Golgi network);GO:0005886(plasma membrane);GO:0048194(Golgi vesicle budding)	ENOG410XPYK(Phospholipid-transporting atpase)	NA	NA	NA	NA(NA)	G7JT17.1 PF00122.18;E1-E2_ATPase;	27.59	7.56	2.06944	up	7.7167e-10	5.49192e-08	yes
TRINITY_DN26162_c1_g1	4078	TRINITY_DN26162_c1_g1_i1;TRINITY_DN26162_c1_g1_i10;TRINITY_DN26162_c1_g1_i11;TRINITY_DN26162_c1_g1_i12;TRINITY_DN26162_c1_g1_i2;TRINITY_DN26162_c1_g1_i3;TRINITY_DN26162_c1_g1_i4;TRINITY_DN26162_c1_g1_i5;TRINITY_DN26162_c1_g1_i6;TRINITY_DN26162_c1_g1_i7;TRINITY_DN26162_c1_g1_i8;TRINITY_DN26162_c1_g1_i9	probable alpha-mannosidase At5g13980 [Medicago truncatula]	At5g13980	Probable alpha-mannosidase At5g13980 OS=Arabidopsis thaliana GN=At5g13980 PE=2 SV=1	GO:0004559(alpha-mannosidase activity);GO:0006013(mannose metabolic process);GO:0006517(protein deglycosylation)	ENOG410XQMZ(Mannosidase alpha class)	K01191	alpha-mannosidase	EC:3.2.1.24	mtr00511(Other glycan degradation)	G7J3A3.1 PF07748.11;Glyco_hydro_38C;	8.03	61.66	-2.78474	down	8.235e-10	5.8458e-08	yes
TRINITY_DN18169_c0_g1	1998	TRINITY_DN18169_c0_g1_i1;TRINITY_DN18169_c0_g1_i2;TRINITY_DN18169_c0_g1_i3;TRINITY_DN18169_c0_g1_i4;TRINITY_DN18169_c0_g1_i5;TRINITY_DN18169_c0_g1_i6	probable serine/threonine-protein kinase PBL18 [Medicago truncatula]	PBL2	Probable serine/threonine-protein kinase PBL2 OS=Arabidopsis thaliana GN=PBL2 PE=1 SV=1	GO:0004675(transmembrane receptor protein serine/threonine kinase activity);GO:0005524(ATP binding);GO:0005634(nucleus);GO:0005886(plasma membrane);GO:0006468(protein phosphorylation);GO:0006952(defense response);GO:0007166(cell surface receptor signaling pathway);GO:0009507(chloroplast);GO:0016301(kinase activity);GO:0030957(Tat protein binding)	COG0515(Serine Threonine protein kinase)	NA	NA	NA	NA(NA)	G7K7R3.1 PF00069.23;Pkinase;	41.91	7.78	2.66955	up	8.71428e-10	6.17024e-08	yes
TRINITY_DN17071_c0_g2	1210	TRINITY_DN17071_c0_g2_i1	vignain [Medicago truncatula]	-	Vignain OS=Vigna mungo PE=1 SV=1	GO:0004197(cysteine-type endopeptidase activity);GO:0005615(extracellular space);GO:0005764(lysosome);GO:0051603(proteolysis involved in cellular protein catabolic process)	COG4870(cathepsin)	NA	NA	NA	NA(NA)	G8A2F7.1 PF00112.21;Peptidase_C1;	10.29	58.68	-2.31231	down	8.91028e-10	6.29297e-08	yes
TRINITY_DN17389_c0_g1	1633	TRINITY_DN17389_c0_g1_i1;TRINITY_DN17389_c0_g1_i2;TRINITY_DN17389_c0_g1_i3	clathrin assembly protein [Medicago truncatula]	At4g40080	Putative clathrin assembly protein At4g40080 OS=Arabidopsis thaliana GN=At4g40080 PE=2 SV=2	GO:0005543(phospholipid binding);GO:0005739(mitochondrion);GO:0005794(Golgi apparatus);GO:0005905(clathrin-coated pit);GO:0006897(endocytosis);GO:0030136(clathrin-coated vesicle)	ENOG410XQ90(Clathrin assembly protein)	NA	NA	NA	NA(NA)	A0A072TTL4.1 PF07651.14;ANTH;	77.58	11.66	2.74009	up	9.95905e-10	7.01582e-08	yes
TRINITY_DN16539_c0_g2	1101	TRINITY_DN16539_c0_g2_i1	annexin-like protein RJ4 [Medicago truncatula]	-	Annexin-like protein RJ4 OS=Fragaria ananassa PE=2 SV=2	GO:0005509(calcium ion binding);GO:0005544(calcium-dependent phospholipid binding);GO:0005634(nucleus);GO:0009408(response to heat);GO:0009409(response to cold);GO:0009414(response to water deprivation);GO:0009651(response to salt stress)	ENOG410XPUN(annexin A7)	NA	NA	NA	NA(NA)	G7LF86.2 PF00191.18;Annexin;	5.27	50.56	-3.0299	down	1.00287e-09	7.04697e-08	yes
TRINITY_DN16626_c0_g1	1944	TRINITY_DN16626_c0_g1_i1;TRINITY_DN16626_c0_g1_i2	uncharacterized protein LOC11442060 [Medicago truncatula]	-	-	GO:0003674(molecular_function);GO:0005575(cellular_component);GO:0008150(biological_process)	ENOG410YQ21(NA)	-	-	-	-	-	49.89	12.45	2.15894	up	1.06064e-09	7.43411e-08	yes
TRINITY_DN21596_c0_g1	1413	TRINITY_DN21596_c0_g1_i1	ethylene-responsive transcription factor ERF061 [Medicago truncatula]	ERF061	Ethylene-responsive transcription factor ERF061 OS=Arabidopsis thaliana GN=ERF061 PE=2 SV=1	GO:0003677(DNA binding);GO:0003700(DNA binding transcription factor activity);GO:0005634(nucleus);GO:0006351(transcription, DNA-templated);GO:0006355(regulation of transcription, DNA-templated);GO:0009873(ethylene-activated signaling pathway);GO:0010200(response to chitin)	ENOG410YMKN(Transcription factor)	NA	NA	NA	NA(NA)	A0A0J8CIL2.1 PF00847.18;AP2;	31.82	3.38	3.38145	up	1.07497e-09	7.51562e-08	yes
TRINITY_DN15992_c0_g3	1851	TRINITY_DN15992_c0_g3_i1;TRINITY_DN15992_c0_g3_i2;TRINITY_DN15992_c0_g3_i3	probable 2-oxoglutarate-dependent dioxygenase At5g05600 [Medicago truncatula]	At5g05600	Probable 2-oxoglutarate-dependent dioxygenase At5g05600 OS=Arabidopsis thaliana GN=At5g05600 PE=2 SV=1	GO:0051213(dioxygenase activity)	COG3491(2OGFe(II) oxygenase)	K05278	flavonol synthase	EC:1.14.20.6	lang00941(Flavonoid biosynthesis)	G7JBS9.1 PF14226.4;DIOX_N;	72.79	9.2	3.13856	up	1.0954e-09	7.63915e-08	yes
TRINITY_DN20192_c0_g2	1051	TRINITY_DN20192_c0_g2_i1;TRINITY_DN20192_c0_g2_i2;TRINITY_DN20192_c0_g2_i3;TRINITY_DN20192_c0_g2_i4;TRINITY_DN20192_c0_g2_i5;TRINITY_DN20192_c0_g2_i6;TRINITY_DN20192_c0_g2_i7;TRINITY_DN20192_c0_g2_i8	protein STAY-GREEN, chloroplastic [Medicago truncatula]	SGR	Protein STAY-GREEN, chloroplastic OS=Pisum sativum GN=SGR PE=2 SV=1	GO:0009507(chloroplast);GO:0010271(regulation of chlorophyll catabolic process)	ENOG4111UAI(Senescence-inducible chloroplast stay-green protein)	K22013	magnesium dechelatase	EC:4.99.1.10	mtr00860(Porphyrin and chlorophyll metabolism)	A0A067FKB9.1 PF12638.5;Staygreen;	156.28	27.45	2.66617	up	1.15573e-09	8.03974e-08	yes
TRINITY_DN25005_c1_g1	1550	TRINITY_DN25005_c1_g1_i1;TRINITY_DN25005_c1_g1_i2;TRINITY_DN25005_c1_g1_i3;TRINITY_DN25005_c1_g1_i4;TRINITY_DN25005_c1_g1_i5;TRINITY_DN25005_c1_g1_i6;TRINITY_DN25005_c1_g1_i7;TRINITY_DN25005_c1_g1_i8;TRINITY_DN25005_c1_g1_i9	NAC transcription factor-like protein [Medicago truncatula]	-	-	-	ENOG410ZJIT(nac domain)	-	-	-	-	-	323.15	65.73	2.70474	up	1.15882e-09	8.04105e-08	yes
TRINITY_DN26021_c3_g3	453	TRINITY_DN26021_c3_g3_i1;TRINITY_DN26021_c3_g3_i2;TRINITY_DN26021_c3_g3_i3;TRINITY_DN26021_c3_g3_i4;TRINITY_DN26021_c3_g3_i5	-	-	-	-	-	-	-	-	-	-	4.56	72.03	-3.7677	down	1.26046e-09	8.72452e-08	yes
TRINITY_DN13093_c0_g1	250	TRINITY_DN13093_c0_g1_i1	hypothetical protein MtrunA17_Chr3g0096231 [Medicago truncatula]	-	-	-	-	-	-	-	-	-	134.8	5.24	4.89365	up	1.31517e-09	9.08057e-08	yes
TRINITY_DN23079_c1_g3	1326	TRINITY_DN23079_c1_g3_i1;TRINITY_DN23079_c1_g3_i2;TRINITY_DN23079_c1_g3_i3	root phototropism protein 3 isoform X2 [Medicago truncatula]	RPT3	Root phototropism protein 3 OS=Arabidopsis thaliana GN=RPT3 PE=1 SV=2	GO:0005886(plasma membrane);GO:0009416(response to light stimulus)	ENOG410YFS1(phototropic-responsive NPH3 family protein)	-	-	-	-	A0A072UH38.1 PF03000.12;NPH3;	8.75	47.24	-2.24888	down	1.49304e-09	1.02831e-07	yes
TRINITY_DN24205_c0_g1	2256	TRINITY_DN24205_c0_g1_i1;TRINITY_DN24205_c0_g1_i10;TRINITY_DN24205_c0_g1_i11;TRINITY_DN24205_c0_g1_i12;TRINITY_DN24205_c0_g1_i13;TRINITY_DN24205_c0_g1_i14;TRINITY_DN24205_c0_g1_i15;TRINITY_DN24205_c0_g1_i16;TRINITY_DN24205_c0_g1_i17;TRINITY_DN24205_c0_g1_i18;TRINITY_DN24205_c0_g1_i19;TRINITY_DN24205_c0_g1_i2;TRINITY_DN24205_c0_g1_i20;TRINITY_DN24205_c0_g1_i21;TRINITY_DN24205_c0_g1_i22;TRINITY_DN2…	putative phosphotransferase with an alcohol group as acceptor [Medicago truncatula]	CK1	Probable choline kinase 1 OS=Arabidopsis thaliana GN=CK1 PE=2 SV=1	GO:0004103(choline kinase activity);GO:0005524(ATP binding);GO:0005737(cytoplasm);GO:0009611(response to wounding);GO:0016310(phosphorylation)	COG0510(Ethanolamine kinase)	K14156	choline/ethanolamine kinase	EC:2.7.1.32 2.7.1.82	mtr00564(Glycerophospholipid metabolism)	Q42810.1 PF01633.18;Choline_kinase;	180.59	44.1	2.05733	up	1.5073e-09	1.03556e-07	yes
TRINITY_DN18503_c0_g2	1693	TRINITY_DN18503_c0_g2_i1;TRINITY_DN18503_c0_g2_i2	calmodulin-binding receptor-like cytoplasmic kinase 2 [Medicago truncatula]	CRCK1	Calmodulin-binding receptor-like cytoplasmic kinase 1 OS=Arabidopsis thaliana GN=CRCK1 PE=1 SV=1	GO:0005886(plasma membrane)	COG0515(Serine Threonine protein kinase)	NA	NA	NA	NA(NA)	A0A072UXI6.1 PF07714.15;Pkinase_Tyr;	23.68	4.39	2.57784	up	1.54027e-09	1.0556e-07	yes
TRINITY_DN26250_c0_g1	2712	TRINITY_DN26250_c0_g1_i1;TRINITY_DN26250_c0_g1_i10;TRINITY_DN26250_c0_g1_i2;TRINITY_DN26250_c0_g1_i3;TRINITY_DN26250_c0_g1_i4;TRINITY_DN26250_c0_g1_i5;TRINITY_DN26250_c0_g1_i6;TRINITY_DN26250_c0_g1_i7;TRINITY_DN26250_c0_g1_i8;TRINITY_DN26250_c0_g1_i9	interferon-related developmental regulator 1 [Medicago truncatula]	IFRD1	Interferon-related developmental regulator 1 OS=Sus scrofa GN=IFRD1 PE=2 SV=1	GO:0005634(nucleus);GO:0005737(cytoplasm);GO:0009651(response to salt stress);GO:0051090(regulation of DNA binding transcription factor activity)	ENOG410XSIZ(Interferon-related developmental regulator)	-	-	-	-	A0A072V1W8.1 PF05004.11;IFRD;	192	45.27	2.05402	up	1.55256e-09	1.0614e-07	yes
TRINITY_DN15551_c0_g3	613	TRINITY_DN15551_c0_g3_i1	zinc finger, C3HC4 type (RING finger) protein [Medicago truncatula]	ATL5	RING-H2 finger protein ATL5 OS=Arabidopsis thaliana GN=ATL5 PE=2 SV=1	GO:0000209(protein polyubiquitination);GO:0005886(plasma membrane);GO:0009789(positive regulation of abscisic acid-activated signaling pathway);GO:0043161(proteasome-mediated ubiquitin-dependent protein catabolic process);GO:0061630(ubiquitin protein ligase activity)	-	NA	NA	NA	NA(NA)	G7JRR0.2 PF13639.4;zf-RING_2;	18.61	0.51	5.3441	up	1.59849e-09	1.08947e-07	yes
TRINITY_DN25445_c1_g2	1469	TRINITY_DN25445_c1_g2_i1;TRINITY_DN25445_c1_g2_i2	uncharacterized protein LOC25496633 [Medicago truncatula]	-	-	GO:0006629(lipid metabolic process);GO:0016020(membrane);GO:0016298(lipase activity)	COG2267(alpha beta hydrolase fold)	K01054	acylglycerol lipase	EC:3.1.1.23	mtr00561(Glycerolipid metabolism)	A0A072UCF9.1 PF12146.6;Hydrolase_4;	9.49	0.91	3.79709	up	1.60147e-09	1.08947e-07	yes
TRINITY_DN13576_c0_g1	1277	TRINITY_DN13576_c0_g1_i1;TRINITY_DN13576_c0_g1_i2	isoleucine N-monooxygenase 1 [Medicago truncatula]	CYP79D3	Isoleucine N-monooxygenase 1 OS=Lotus japonicus GN=CYP79D3 PE=1 SV=1	GO:0016020(membrane);GO:0016709(oxidoreductase activity, acting on paired donors, with incorporation or reduction of molecular oxygen, NAD(P)H as one donor, and incorporation of one atom of oxygen);GO:0044550(secondary metabolite biosynthetic process)	COG2124(Cytochrome p450)	K12153	phenylalanine N-monooxygenase	EC:1.14.14.40	mtr00460(Cyanoamino acid metabolism);mtr00966(Glucosinolate biosynthesis)	A0A072UYH5.1 PF00067.20;p450;	4.13	0.02	7.97968	up	1.62532e-09	1.10299e-07	yes
TRINITY_DN20934_c0_g3	2307	TRINITY_DN20934_c0_g3_i1;TRINITY_DN20934_c0_g3_i2;TRINITY_DN20934_c0_g3_i3	transcription factor bHLH13 [Medicago truncatula]	BHLH13	Transcription factor bHLH13 OS=Arabidopsis thaliana GN=BHLH13 PE=2 SV=1	GO:0003677(DNA binding);GO:0003700(DNA binding transcription factor activity);GO:0005515(protein binding);GO:0005634(nucleus);GO:0005737(cytoplasm);GO:0006351(transcription, DNA-templated);GO:0006355(regulation of transcription, DNA-templated);GO:0010629(negative regulation of gene expression);GO:0044212(transcription regulatory region DNA binding);GO:0046983(protein dimerization activity)	ENOG410YCJJ(anthocyanin-containing compound biosynthetic process)	K13422	transcription factor MYC2	-	nnu04016(MAPK signaling pathway - plant);nnu04075(Plant hormone signal transduction)	A0A072TP53.1 PF14215.4;bHLH-MYC_N;	26.61	7.37	2.02285	up	1.66506e-09	1.1251e-07	yes
TRINITY_DN18351_c1_g2	933	TRINITY_DN18351_c1_g2_i1;TRINITY_DN18351_c1_g2_i2;TRINITY_DN18351_c1_g2_i3	uncharacterized protein LOC11428258 [Medicago truncatula]	-	-	-	ENOG410Z7U7(Conserved gene of)	-	-	-	-	-	14.17	0.32	5.78418	up	1.66601e-09	1.1251e-07	yes
TRINITY_DN14072_c0_g1	1660	TRINITY_DN14072_c0_g1_i1;TRINITY_DN14072_c0_g1_i2;TRINITY_DN14072_c0_g1_i3	calcium uniporter protein 5, mitochondrial [Medicago truncatula]	At1g57610	Calcium uniporter protein 5, mitochondrial OS=Arabidopsis thaliana GN=At1g57610 PE=2 SV=1	GO:0015292(uniporter activity)	ENOG410Y3YU(Coiled-coil domain containing 109B)	NA	NA	NA	NA(NA)	A0A072UXK6.1 PF04678.11;MCU;	13.9	0.91	3.44636	up	1.70403e-09	1.14799e-07	yes
TRINITY_DN24926_c0_g1	1252	TRINITY_DN24926_c0_g1_i1	galactinol--sucrose galactosyltransferase [Medicago truncatula]	RFS	Galactinol--sucrose galactosyltransferase OS=Pisum sativum GN=RFS PE=1 SV=1	GO:0004553(hydrolase activity, hydrolyzing O-glycosyl compounds);GO:0005737(cytoplasm);GO:0005975(carbohydrate metabolic process);GO:0005986(sucrose biosynthetic process);GO:0006979(response to oxidative stress);GO:0009414(response to water deprivation);GO:0009507(chloroplast);GO:0009737(response to abscisic acid);GO:0010325(raffinose family oligosaccharide biosynthetic process);GO:0019593(mannit…	ENOG410YBUA(galactinol--sucrose)	K06617	raffinose synthase	EC:2.4.1.82	mtr00052(Galactose metabolism)	G7J4U7.1 PF05691.10;Raffinose_syn;	24.75	5.95	2.23348	up	1.76837e-09	1.18845e-07	yes
TRINITY_DN17667_c0_g2	1101	TRINITY_DN17667_c0_g2_i1;TRINITY_DN17667_c0_g2_i2;TRINITY_DN17667_c0_g2_i3	tRNase Z TRZ2, chloroplastic [Medicago truncatula]	-	-	-	-	K00784	ribonuclease Z	EC:3.1.26.11	mtr03013(RNA transport)	-	36.83	6.54	2.77406	up	1.8345e-09	1.22991e-07	yes
TRINITY_DN13262_c0_g1	1091	TRINITY_DN13262_c0_g1_i1;TRINITY_DN13262_c0_g1_i2;TRINITY_DN13262_c0_g1_i3	transcription factor MYB30 [Medicago truncatula]	MYB306	Myb-related protein 306 OS=Antirrhinum majus GN=MYB306 PE=2 SV=1	GO:0000981(RNA polymerase II transcription factor activity, sequence-specific DNA binding);GO:0001135(transcription factor activity, RNA polymerase II transcription factor recruiting);GO:0001666(response to hypoxia);GO:0003677(DNA binding);GO:0003700(DNA binding transcription factor activity);GO:0005515(protein binding);GO:0005634(nucleus);GO:0006351(transcription, DNA-templated);GO:0006357(regul…	COG5147(Myblike DNAbinding domain containing protein)	NA	NA	NA	NA(NA)	A0A0E0AJQ9.1 PF00022.17;Actin;	24.54	4.65	2.79339	up	1.84411e-09	1.23338e-07	yes
TRINITY_DN12466_c0_g1	494	TRINITY_DN12466_c0_g1_i1;TRINITY_DN12466_c0_g1_i2	hypothetical protein MTR_4g068560 [Medicago truncatula]	-	-	GO:0003674(molecular_function);GO:0005575(cellular_component);GO:0008150(biological_process)	ENOG4111B6H(NA)	-	-	-	-	-	0.81	39.75	-5.34347	down	1.84949e-09	1.234e-07	yes
TRINITY_DN17635_c1_g1	1269	TRINITY_DN17635_c1_g1_i1;TRINITY_DN17635_c1_g1_i2;TRINITY_DN17635_c1_g1_i3	probable bifunctional TENA-E protein [Medicago truncatula]	TENA_E	Probable bifunctional TENA-E protein OS=Glycine max GN=TENA_E PE=2 SV=1	GO:0005575(cellular_component);GO:0009228(thiamine biosynthetic process);GO:0009229(thiamine diphosphate biosynthetic process);GO:0050334(thiaminase activity)	COG0819(Transcriptional activator, tena)	K20896	formylaminopyrimidine deformylase / aminopyrimidine aminohydrolase	EC:3.5.1.- 3.5.99.-	mtr00730(Thiamine metabolism)	G7JMU3.1 PF03070.14;TENA_THI-4;	38.75	10.97	2.00647	up	1.86373e-09	1.24052e-07	yes
TRINITY_DN17828_c0_g1	1546	TRINITY_DN17828_c0_g1_i1;TRINITY_DN17828_c0_g1_i2	uncharacterized protein LOC11430703 [Medicago truncatula]	-	-	GO:0003674(molecular_function);GO:0008150(biological_process);GO:0009507(chloroplast)	ENOG410Y1R0(NA)	NA	NA	NA	NA(NA)	F6HXM8.1 PF07647.15;SAM_2;	131.55	38.48	1.96738	up	1.86938e-09	1.2413e-07	yes
TRINITY_DN15663_c0_g2	2392	TRINITY_DN15663_c0_g2_i1;TRINITY_DN15663_c0_g2_i2;TRINITY_DN15663_c0_g2_i3;TRINITY_DN15663_c0_g2_i4;TRINITY_DN15663_c0_g2_i5;TRINITY_DN15663_c0_g2_i6;TRINITY_DN15663_c0_g2_i7	protein LNK3 isoform X1 [Medicago truncatula]	LNK3	Protein LNK3 OS=Arabidopsis thaliana GN=LNK3 PE=1 SV=1	GO:0003674(molecular_function);GO:0005634(nucleus);GO:0006351(transcription, DNA-templated);GO:0006355(regulation of transcription, DNA-templated);GO:0007623(circadian rhythm)	ENOG411140C(NA)	-	-	-	-	-	142.13	15.12	3.25445	up	1.88738e-09	1.25027e-07	yes
TRINITY_DN21786_c0_g2	852	TRINITY_DN21786_c0_g2_i1;TRINITY_DN21786_c0_g2_i2	protein PLASTID MOVEMENT IMPAIRED 1 [Medicago truncatula]	PMI1	Protein PLASTID MOVEMENT IMPAIRED 1 OS=Arabidopsis thaliana GN=PMI1 PE=1 SV=1	GO:0005622(intracellular);GO:0005623(cell);GO:0005829(cytosol);GO:0005886(plasma membrane);GO:0006970(response to osmotic stress);GO:0009507(chloroplast);GO:0009637(response to blue light);GO:0009738(abscisic acid-activated signaling pathway);GO:0009787(regulation of abscisic acid-activated signaling pathway);GO:0009902(chloroplast relocation);GO:0009903(chloroplast avoidance movement);GO:0010029…	ENOG410Y932(NA)	-	-	-	-	-	54.32	13.29	2.19709	up	1.98293e-09	1.31043e-07	yes
TRINITY_DN19327_c0_g1	961	TRINITY_DN19327_c0_g1_i1;TRINITY_DN19327_c0_g1_i2;TRINITY_DN19327_c0_g1_i3	dehydrin b [Trifolium repens]	-	-	GO:0005829(cytosol);GO:0009414(response to water deprivation);GO:0009631(cold acclimation);GO:0009737(response to abscisic acid);GO:0016020(membrane)	ENOG410ZBHP(dehydrin)	-	-	-	-	G7J7R2.1 PF00257.17;Dehydrin;	1540.3	344.59	2.31573	up	1.99809e-09	1.31732e-07	yes
TRINITY_DN13496_c0_g10	468	TRINITY_DN13496_c0_g10_i1;TRINITY_DN13496_c0_g10_i2	-	-	-	-	-	-	-	-	-	-	14.57	0.31	5.53558	up	2.03781e-09	1.34032e-07	yes
TRINITY_DN21469_c2_g2	1492	TRINITY_DN21469_c2_g2_i1;TRINITY_DN21469_c2_g2_i2;TRINITY_DN21469_c2_g2_i3	protochlorophyllide reductase, chloroplastic [Medicago truncatula]	3PCR	Protochlorophyllide reductase, chloroplastic OS=Pisum sativum GN=3PCR PE=1 SV=1	GO:0005515(protein binding);GO:0009507(chloroplast);GO:0009534(chloroplast thylakoid);GO:0009640(photomorphogenesis);GO:0009647(skotomorphogenesis);GO:0009723(response to ethylene);GO:0009941(chloroplast envelope);GO:0015979(photosynthesis);GO:0015995(chlorophyll biosynthetic process);GO:0016491(oxidoreductase activity);GO:0016630(protochlorophyllide reductase activity);GO:0055114(oxidation-reduc…	COG1028(Dehydrogenase reductase)	K00218	protochlorophyllide reductase	EC:1.3.1.33	mtr00860(Porphyrin and chlorophyll metabolism)	V7BUE6.1 PF00106.23;adh_short;	55.19	422.38	-2.74139	down	2.09735e-09	1.37622e-07	yes
TRINITY_DN24307_c0_g3	1195	TRINITY_DN24307_c0_g3_i1	dof zinc finger protein DOF1.2 [Medicago truncatula]	DOF3.5	Dof zinc finger protein DOF3.5 OS=Arabidopsis thaliana GN=DOF3.5 PE=3 SV=1	GO:0003677(DNA binding);GO:0003700(DNA binding transcription factor activity);GO:0005634(nucleus);GO:0006351(transcription, DNA-templated);GO:0006355(regulation of transcription, DNA-templated);GO:0046872(metal ion binding)	ENOG410YN7T(Zinc finger protein)	NA	NA	NA	NA(NA)	K7LI29.1 PF02701.13;zf-Dof;	11.07	0.36	5.11523	up	2.14177e-09	1.40205e-07	yes
TRINITY_DN13496_c0_g11	418	TRINITY_DN13496_c0_g11_i1	transmembrane protein, putative [Medicago truncatula]	-	-	-	-	-	-	-	-	-	12.03	0.13	6.39213	up	2.15503e-09	1.40528e-07	yes
TRINITY_DN23139_c0_g1	1054	TRINITY_DN23139_c0_g1_i1;TRINITY_DN23139_c0_g1_i2;TRINITY_DN23139_c0_g1_i3	RING-H2 zinc finger protein [Medicago truncatula]	ATL72	RING-H2 finger protein ATL72 OS=Arabidopsis thaliana GN=ATL72 PE=2 SV=1	GO:0010200(response to chitin);GO:0043161(proteasome-mediated ubiquitin-dependent protein catabolic process);GO:0061630(ubiquitin protein ligase activity)	ENOG41121N2(zinc ion binding)	NA	NA	NA	NA(NA)	A0A072V138.1 PF13639.4;zf-RING_2;	1.97	20.59	-3.19145	down	2.15682e-09	1.40528e-07	yes
TRINITY_DN16454_c0_g2	1471	TRINITY_DN16454_c0_g2_i1;TRINITY_DN16454_c0_g2_i2;TRINITY_DN16454_c0_g2_i3	putative nepenthesin [Medicago truncatula]	BG	Basic 7S globulin OS=Glycine max GN=BG PE=1 SV=2	GO:0004190(aspartic-type endopeptidase activity);GO:0006508(proteolysis);GO:0030163(protein catabolic process)	ENOG410XNV7(aspartic)	-	-	-	-	G7IEE7.1 PF14543.4;TAXi_N;	9.36	0.79	3.81507	up	2.18362e-09	1.4194e-07	yes
TRINITY_DN26158_c1_g2	1251	TRINITY_DN26158_c1_g2_i1;TRINITY_DN26158_c1_g2_i2;TRINITY_DN26158_c1_g2_i3;TRINITY_DN26158_c1_g2_i4	aspartic proteinase PCS1 [Medicago truncatula]	PCS1	Aspartic proteinase PCS1 OS=Arabidopsis thaliana GN=PCS1 PE=2 SV=1	GO:0004190(aspartic-type endopeptidase activity);GO:0006508(proteolysis);GO:0030163(protein catabolic process)	ENOG410XNV7(aspartic)	-	-	-	-	G7KG25.1 PF14541.4;TAXi_C;	287.69	89.45	2.09234	up	2.19876e-09	1.4259e-07	yes
TRINITY_DN21892_c2_g6	943	TRINITY_DN21892_c2_g6_i1	-	-	-	-	-	-	-	-	-	-	4.01	0	9.37611	up	2.38879e-09	1.54553e-07	yes
TRINITY_DN19919_c0_g1	2312	TRINITY_DN19919_c0_g1_i1;TRINITY_DN19919_c0_g1_i2;TRINITY_DN19919_c0_g1_i3;TRINITY_DN19919_c0_g1_i4;TRINITY_DN19919_c0_g1_i5	probable protein phosphatase 2C 63 [Medicago truncatula]	At4g33920	Probable protein phosphatase 2C 63 OS=Arabidopsis thaliana GN=At4g33920 PE=2 SV=1	GO:0004722(protein serine/threonine phosphatase activity);GO:0006470(protein dephosphorylation);GO:0046872(metal ion binding)	COG0631(Phosphatase)	NA	NA	NA	NA(NA)	A0A072VQT7.1 PF00481.19;PP2C;	50.99	13.64	2.07096	up	2.42208e-09	1.56342e-07	yes
TRINITY_DN19958_c1_g3	2710	TRINITY_DN19958_c1_g3_i1	G-type lectin S-receptor-like serine/threonine-protein kinase B120 [Medicago truncatula]	B120	G-type lectin S-receptor-like serine/threonine-protein kinase B120 OS=Arabidopsis thaliana GN=B120 PE=2 SV=1	GO:0004674(protein serine/threonine kinase activity);GO:0005886(plasma membrane);GO:0006468(protein phosphorylation);GO:0006952(defense response);GO:0009506(plasmodesma)	COG0515(Serine Threonine protein kinase)	NA	NA	NA	NA(NA)	G7IK56.2 PF07714.15;Pkinase_Tyr;	7.23	0.25	5.00967	up	2.48363e-09	1.59943e-07	yes
TRINITY_DN24381_c0_g1	1866	TRINITY_DN24381_c0_g1_i1;TRINITY_DN24381_c0_g1_i2;TRINITY_DN24381_c0_g1_i3;TRINITY_DN24381_c0_g1_i4;TRINITY_DN24381_c0_g1_i5;TRINITY_DN24381_c0_g1_i6;TRINITY_DN24381_c0_g1_i7	putative ribose-5-phosphate isomerase-like protein [Trifolium pratense]	RPI2	Probable ribose-5-phosphate isomerase 2 OS=Arabidopsis thaliana GN=RPI2 PE=1 SV=1	GO:0004751(ribose-5-phosphate isomerase activity);GO:0005737(cytoplasm);GO:0008219(cell death);GO:0009052(pentose-phosphate shunt, non-oxidative branch);GO:0010228(vegetative to reproductive phase transition of meristem)	COG0120(phosphoriboisomerase A)	K01807	ribose 5-phosphate isomerase A	EC:5.3.1.6	mtr00030(Pentose phosphate pathway);mtr00710(Carbon fixation in photosynthetic organisms)	G7IAT2.2 PF06026.12;Rib_5-P_isom_A;	107.05	26.42	2.2268	up	2.56418e-09	1.64444e-07	yes
TRINITY_DN22337_c0_g3	1144	TRINITY_DN22337_c0_g3_i1	zinc finger CCCH domain-containing protein 20 [Medicago truncatula]	At2g19810	Zinc finger CCCH domain-containing protein 20 OS=Arabidopsis thaliana GN=At2g19810 PE=2 SV=1	GO:0003676(nucleic acid binding);GO:0003677(DNA binding);GO:0003700(DNA binding transcription factor activity);GO:0005634(nucleus);GO:0005886(plasma membrane);GO:0006355(regulation of transcription, DNA-templated);GO:0006979(response to oxidative stress);GO:0046872(metal ion binding)	ENOG410XR0Z(zinc finger CCCH domain-containing protein)	NA	NA	NA	NA(NA)	A0A0J8D1N5.1 PF10477.7;EIF4E-T;	0.27	26.98	-6.47302	down	2.56536e-09	1.64444e-07	yes
TRINITY_DN25741_c1_g3	2955	TRINITY_DN25741_c1_g3_i1;TRINITY_DN25741_c1_g3_i2;TRINITY_DN25741_c1_g3_i3;TRINITY_DN25741_c1_g3_i4;TRINITY_DN25741_c1_g3_i5;TRINITY_DN25741_c1_g3_i6	probable disease resistance protein At5g66900 [Medicago truncatula]	At4g33300	Probable disease resistance protein At4g33300 OS=Arabidopsis thaliana GN=At4g33300 PE=2 SV=3	GO:0005524(ATP binding);GO:0006952(defense response);GO:0042742(defense response to bacterium);GO:0043531(ADP binding);GO:0048046(apoplast)	COG4886(leucine Rich Repeat)	K13415	protein brassinosteroid insensitive 1	EC:2.7.10.1 2.7.11.1	mdm04075(Plant hormone signal transduction)	G7LGA8.1 PF00931.20;NB-ARC;	404.3	97.23	2.27436	up	2.63776e-09	1.6869e-07	yes
TRINITY_DN13677_c0_g1	1313	TRINITY_DN13677_c0_g1_i1;TRINITY_DN13677_c0_g1_i2;TRINITY_DN13677_c0_g1_i3;TRINITY_DN13677_c0_g1_i4;TRINITY_DN13677_c0_g1_i5;TRINITY_DN13677_c0_g1_i6;TRINITY_DN13677_c0_g1_i7	stem-specific protein TSJT1 [Medicago truncatula]	TSJT1	Stem-specific protein TSJT1 OS=Nicotiana tabacum GN=TSJT1 PE=2 SV=1	GO:0004066(asparagine synthase (glutamine-hydrolyzing) activity);GO:0005829(cytosol);GO:0006529(asparagine biosynthetic process);GO:0006541(glutamine metabolic process);GO:0042803(protein homodimerization activity)	-	NA	NA	NA	NA(NA)	G7IP19.1 PF12481.6;DUF3700;	4.48	62.95	-3.6245	down	2.64376e-09	1.6869e-07	yes
TRINITY_DN21962_c0_g1	1839	TRINITY_DN21962_c0_g1_i1;TRINITY_DN21962_c0_g1_i2;TRINITY_DN21962_c0_g1_i3	GDP-mannose 4,6 dehydratase 1 [Medicago truncatula]	GMD1	GDP-mannose 4,6 dehydratase 1 OS=Arabidopsis thaliana GN=GMD1 PE=1 SV=1	GO:0005515(protein binding);GO:0005794(Golgi apparatus);GO:0008446(GDP-mannose 4,6-dehydratase activity);GO:0009225(nucleotide-sugar metabolic process);GO:0019673(GDP-mannose metabolic process);GO:0042351('de novo' GDP-L-fucose biosynthetic process)	COG1089(GDP-mannose 4,6-dehydratase)	K01711	GDPmannose 4,6-dehydratase	EC:4.2.1.47	mtr00051(Fructose and mannose metabolism);mtr00520(Amino sugar and nucleotide sugar metabolism)	M5W8I7.1 PF16363.3;GDP_Man_Dehyd;	70.35	12.2	2.69089	up	2.74932e-09	1.75023e-07	yes
TRINITY_DN19726_c0_g1	1019	TRINITY_DN19726_c0_g1_i1;TRINITY_DN19726_c0_g1_i2;TRINITY_DN19726_c0_g1_i3;TRINITY_DN19726_c0_g1_i4;TRINITY_DN19726_c0_g1_i5;TRINITY_DN19726_c0_g1_i6;TRINITY_DN19726_c0_g1_i7;TRINITY_DN19726_c0_g1_i8;TRINITY_DN19726_c0_g1_i9	-	-	-	-	-	-	-	-	-	-	282.29	55.77	2.5372	up	2.82741e-09	1.79583e-07	yes
TRINITY_DN19331_c0_g2	379	TRINITY_DN19331_c0_g2_i1	hypothetical protein TSUD_289410 [Trifolium subterraneum]	-	-	-	-	-	-	-	-	-	4.63	82.35	-3.91591	down	2.88388e-09	1.82751e-07	yes
TRINITY_DN11584_c0_g1	701	TRINITY_DN11584_c0_g1_i1	hypothetical protein MtrunA17_Chr4g0071901 [Medicago truncatula]	-	-	-	ENOG410YY7X(NA)	-	-	-	-	G7JUB6.1 PF14009.4;DUF4228;	123.13	10.08	3.80223	up	2.89174e-09	1.82832e-07	yes
TRINITY_DN25741_c1_g2	460	TRINITY_DN25741_c1_g2_i1;TRINITY_DN25741_c1_g2_i2	putative P-loop containing nucleoside triphosphate hydrolase, leucine-rich repeat domain, L [Medicago truncatula]	At4g33300	Probable disease resistance protein At4g33300 OS=Arabidopsis thaliana GN=At4g33300 PE=2 SV=3	GO:0005524(ATP binding);GO:0006952(defense response);GO:0042742(defense response to bacterium);GO:0043531(ADP binding);GO:0048046(apoplast)	COG4886(leucine Rich Repeat)	K13457	disease resistance protein RPM1	-	pmum04626(Plant-pathogen interaction)	G7LFN9.1 PF00931.20;NB-ARC;	239.09	66.95	2.04709	up	2.90017e-09	1.82948e-07	yes
TRINITY_DN14463_c0_g1	1104	TRINITY_DN14463_c0_g1_i1;TRINITY_DN14463_c0_g1_i2;TRINITY_DN14463_c0_g1_i3;TRINITY_DN14463_c0_g1_i4	auxin-responsive protein SAUR32 [Medicago truncatula]	SAUR32	Auxin-responsive protein SAUR32 OS=Arabidopsis thaliana GN=SAUR32 PE=2 SV=1	GO:0003674(molecular_function);GO:0007275(multicellular organism development);GO:0009733(response to auxin);GO:0009734(auxin-activated signaling pathway);GO:0040008(regulation of growth)	ENOG410YXA2(Auxin-induced protein)	K14488	SAUR family protein	-	mtr04075(Plant hormone signal transduction)	B7FME9.1 PF02519.12;Auxin_inducible;	8.23	43.39	-2.22981	down	3.02446e-09	1.90356e-07	yes
TRINITY_DN11138_c0_g1	1121	TRINITY_DN11138_c0_g1_i1	uncharacterized protein LOC25489970 [Medicago truncatula]	-	-	GO:0005739(mitochondrion);GO:0016021(integral component of membrane)	ENOG410YW7Z(NA)	-	-	-	-	-	11.4	0.91	3.81135	up	3.09192e-09	1.94161e-07	yes
TRINITY_DN16650_c1_g1	2549	TRINITY_DN16650_c1_g1_i1;TRINITY_DN16650_c1_g1_i2;TRINITY_DN16650_c1_g1_i3;TRINITY_DN16650_c1_g1_i4;TRINITY_DN16650_c1_g1_i5;TRINITY_DN16650_c1_g1_i6;TRINITY_DN16650_c1_g1_i7;TRINITY_DN16650_c1_g1_i8;TRINITY_DN16650_c1_g1_i9	cold-responsive protein kinase 1 [Medicago truncatula]	CRK2	Cysteine-rich receptor-like protein kinase 2 OS=Arabidopsis thaliana GN=CRK2 PE=2 SV=1	GO:0004674(protein serine/threonine kinase activity);GO:0005886(plasma membrane)	COG0515(Serine Threonine protein kinase)	NA	NA	NA	NA(NA)	G7J7V5.1 PF07714.15;Pkinase_Tyr;	236.24	36.92	2.81358	up	3.19855e-09	2.00404e-07	yes
TRINITY_DN16770_c0_g2	1220	TRINITY_DN16770_c0_g2_i1;TRINITY_DN16770_c0_g2_i2;TRINITY_DN16770_c0_g2_i3	chloroplastic lipocalin isoform X1 [Medicago truncatula]	CHL	Chloroplastic lipocalin OS=Arabidopsis thaliana GN=CHL PE=1 SV=1	GO:0005576(extracellular region);GO:0006629(lipid metabolic process);GO:0006979(response to oxidative stress);GO:0009408(response to heat);GO:0009414(response to water deprivation);GO:0009507(chloroplast);GO:0009535(chloroplast thylakoid membrane);GO:0009543(chloroplast thylakoid lumen);GO:0009644(response to high light intensity);GO:0009737(response to abscisic acid);GO:0010431(seed maturation);…	COG3040(Outer membrane lipoprotein)	NA	NA	NA	NA(NA)	G7K3G5.2 PF08212.10;Lipocalin_2;	4.33	27.74	-2.45912	down	3.31274e-09	2.06946e-07	yes
TRINITY_DN17234_c0_g1	858	TRINITY_DN17234_c0_g1_i1;TRINITY_DN17234_c0_g1_i2;TRINITY_DN17234_c0_g1_i3;TRINITY_DN17234_c0_g1_i4	unknown [Medicago truncatula]	-	-	GO:0003674(molecular_function);GO:0005634(nucleus);GO:0008150(biological_process)	ENOG410YVXT(Pfam:DUF584)	NA	NA	NA	NA(NA)	G7JNE3.1 PF04520.11;Senescence_reg;	0.51	26.07	-5.5009	down	3.31788e-09	2.06946e-07	yes
TRINITY_DN23411_c0_g1	2222	TRINITY_DN23411_c0_g1_i1;TRINITY_DN23411_c0_g1_i2;TRINITY_DN23411_c0_g1_i3;TRINITY_DN23411_c0_g1_i4	pectinesterase [Medicago truncatula]	PME40	Probable pectinesterase/pectinesterase inhibitor 40 OS=Arabidopsis thaliana GN=PME40 PE=2 SV=1	GO:0030599(pectinesterase activity);GO:0046910(pectinesterase inhibitor activity);GO:0071944(cell periphery)	COG4677(pectinesterase)	K01051	pectinesterase	EC:3.1.1.11	mtr00040(Pentose and glucuronate interconversions)	A0A072U3V6.1 PF01095.17;Pectinesterase;	9.54	80.05	-2.85682	down	3.33759e-09	2.07709e-07	yes
TRINITY_DN17847_c1_g1	1231	TRINITY_DN17847_c1_g1_i1;TRINITY_DN17847_c1_g1_i10;TRINITY_DN17847_c1_g1_i11;TRINITY_DN17847_c1_g1_i2;TRINITY_DN17847_c1_g1_i3;TRINITY_DN17847_c1_g1_i4;TRINITY_DN17847_c1_g1_i5;TRINITY_DN17847_c1_g1_i6;TRINITY_DN17847_c1_g1_i7;TRINITY_DN17847_c1_g1_i8;TRINITY_DN17847_c1_g1_i9	uncharacterized protein LOC25500802 [Medicago truncatula]	-	-	GO:0003674(molecular_function);GO:0008150(biological_process);GO:0009507(chloroplast)	ENOG4111N7Q(Uncharacterized conserved protein (DUF2358))	-	-	-	-	A0A072TMQ2.1 PF10184.7;DUF2358;	7.65	37.91	-2.46016	down	3.53589e-09	2.19557e-07	yes
TRINITY_DN19677_c0_g1	1389	TRINITY_DN19677_c0_g1_i1;TRINITY_DN19677_c0_g1_i2;TRINITY_DN19677_c0_g1_i3;TRINITY_DN19677_c0_g1_i4;TRINITY_DN19677_c0_g1_i5;TRINITY_DN19677_c0_g1_i6	blue copper protein [Medicago truncatula]	UCC1	Uclacyanin 1 OS=Arabidopsis thaliana GN=UCC1 PE=1 SV=1	GO:0046658(anchored component of plasma membrane)	ENOG410YP7M(Copper ion binding electron carrier)	-	-	-	-	G7JE55.1 PF02298.15;Cu_bind_like;	64.03	12.35	2.27879	up	3.86058e-09	2.39184e-07	yes
TRINITY_DN7617_c0_g1	595	TRINITY_DN7617_c0_g1_i1	uncharacterized protein LOC11422873 [Medicago truncatula]	-	-	GO:0003674(molecular_function);GO:0008150(biological_process);GO:0016021(integral component of membrane)	ENOG410Z0WX(NA)	-	-	-	-	-	41.79	6.11	2.97904	up	3.9946e-09	2.46936e-07	yes
TRINITY_DN19535_c0_g2	996	TRINITY_DN19535_c0_g2_i1;TRINITY_DN19535_c0_g2_i2;TRINITY_DN19535_c0_g2_i3;TRINITY_DN19535_c0_g2_i4;TRINITY_DN19535_c0_g2_i5;TRINITY_DN19535_c0_g2_i6	probable membrane-associated kinase regulator 6 [Medicago truncatula]	MAKR6	Probable membrane-associated kinase regulator 6 OS=Arabidopsis thaliana GN=MAKR6 PE=2 SV=1	GO:0003674(molecular_function);GO:0005634(nucleus);GO:0005886(plasma membrane);GO:0009738(abscisic acid-activated signaling pathway)	ENOG41114QY(membrane-associated kinase regulator)	-	-	-	-	-	14.14	174.02	-3.38884	down	4.13982e-09	2.55344e-07	yes
TRINITY_DN18560_c1_g1	442	TRINITY_DN18560_c1_g1_i1;TRINITY_DN18560_c1_g1_i2;TRINITY_DN18560_c1_g1_i3	hypothetical protein MtrunA17_Chr5g0434421 [Medicago truncatula]	-	-	GO:0004190(aspartic-type endopeptidase activity);GO:0006508(proteolysis);GO:0030163(protein catabolic process)	ENOG410XNV7(aspartic)	-	-	-	-	G7KG25.1 PF14543.4;TAXi_N;	327.16	94.79	1.9832	up	4.17101e-09	2.56697e-07	yes
TRINITY_DN13544_c0_g2	1471	TRINITY_DN13544_c0_g2_i1	transcription factor TCP9 [Medicago truncatula]	TCP9	Transcription factor TCP9 OS=Arabidopsis thaliana GN=TCP9 PE=1 SV=1	GO:0003677(DNA binding);GO:0003700(DNA binding transcription factor activity);GO:0005515(protein binding);GO:0005634(nucleus);GO:0006351(transcription, DNA-templated);GO:0006355(regulation of transcription, DNA-templated);GO:0008361(regulation of cell size);GO:0048364(root development);GO:1900056(negative regulation of leaf senescence)	ENOG410YJS2(transcription factor)	K16221	transcription factor TCP21 (protein CCA1 HIKING EXPEDITION)	-	boe04712(Circadian rhythm - plant)	A0A072TP77.1 PF03634.11;TCP;	60.18	16.35	2.07085	up	4.22488e-09	2.59437e-07	yes
TRINITY_DN23715_c0_g4	1331	TRINITY_DN23715_c0_g4_i1;TRINITY_DN23715_c0_g4_i2	ethylene-responsive transcription factor 3-like [Medicago truncatula]	ERF3	Ethylene-responsive transcription factor 3 OS=Nicotiana tabacum GN=ERF3 PE=2 SV=1	GO:0003677(DNA binding);GO:0003700(DNA binding transcription factor activity);GO:0005515(protein binding);GO:0005634(nucleus);GO:0006351(transcription, DNA-templated);GO:0006355(regulation of transcription, DNA-templated);GO:0006952(defense response);GO:0009873(ethylene-activated signaling pathway);GO:0010105(negative regulation of ethylene-activated signaling pathway);GO:0043565(sequence-specifi…	ENOG410YQNQ(ethylene mediated signaling pathway)	NA	NA	NA	NA(NA)	I1KYC2.1 PF00847.18;AP2;	96.58	29.47	1.889	up	4.27222e-09	2.61765e-07	yes
TRINITY_DN22948_c0_g1	2885	TRINITY_DN22948_c0_g1_i1;TRINITY_DN22948_c0_g1_i10;TRINITY_DN22948_c0_g1_i11;TRINITY_DN22948_c0_g1_i12;TRINITY_DN22948_c0_g1_i13;TRINITY_DN22948_c0_g1_i2;TRINITY_DN22948_c0_g1_i3;TRINITY_DN22948_c0_g1_i4;TRINITY_DN22948_c0_g1_i5;TRINITY_DN22948_c0_g1_i6;TRINITY_DN22948_c0_g1_i7;TRINITY_DN22948_c0_g1_i8;TRINITY_DN22948_c0_g1_i9	F-box protein PP2-A13 [Medicago truncatula]	PP2A13	F-box protein PP2-A13 OS=Arabidopsis thaliana GN=PP2A13 PE=1 SV=1	GO:0005515(protein binding);GO:0005634(nucleus);GO:0009611(response to wounding);GO:0016567(protein ubiquitination);GO:0030246(carbohydrate binding)	ENOG410Y934(F-box protein)	-	-	-	-	A0A072TJF7.1 PF14299.4;PP2;	4.58	23	-2.14279	down	4.44883e-09	2.7156e-07	yes
TRINITY_DN12277_c0_g1	1141	TRINITY_DN12277_c0_g1_i1	auxin-binding protein ABP19a [Medicago truncatula]	ABP19A	Auxin-binding protein ABP19a OS=Prunus persica GN=ABP19A PE=3 SV=1	GO:0005618(cell wall);GO:0033609(oxalate metabolic process);GO:0046564(oxalate decarboxylase activity)	ENOG410YB6M(germin-like protein)	-	-	-	-	I3ST27.1 PF00190.20;Cupin_1;	1.46	66.4	-5.22718	down	4.45164e-09	2.7156e-07	yes
TRINITY_DN18844_c0_g2	864	TRINITY_DN18844_c0_g2_i1;TRINITY_DN18844_c0_g2_i2;TRINITY_DN18844_c0_g2_i3;TRINITY_DN18844_c0_g2_i4;TRINITY_DN18844_c0_g2_i5;TRINITY_DN18844_c0_g2_i6;TRINITY_DN18844_c0_g2_i7	probable glutathione S-transferase [Medicago truncatula]	HSP26-A	Probable glutathione S-transferase OS=Glycine max GN=HSP26-A PE=2 SV=1	GO:0004364(glutathione transferase activity);GO:0005737(cytoplasm);GO:0006749(glutathione metabolic process);GO:0009407(toxin catabolic process)	ENOG410XSIX(glutathione Stransferase)	K00799	glutathione S-transferase	EC:2.5.1.18	mtr00480(Glutathione metabolism)	G7L6H6.2 PF00043.23;GST_C;	386.94	48.29	3.19057	up	4.51646e-09	2.7491e-07	yes
TRINITY_DN25600_c0_g1	2147	TRINITY_DN25600_c0_g1_i1;TRINITY_DN25600_c0_g1_i10;TRINITY_DN25600_c0_g1_i11;TRINITY_DN25600_c0_g1_i12;TRINITY_DN25600_c0_g1_i13;TRINITY_DN25600_c0_g1_i14;TRINITY_DN25600_c0_g1_i2;TRINITY_DN25600_c0_g1_i3;TRINITY_DN25600_c0_g1_i4;TRINITY_DN25600_c0_g1_i5;TRINITY_DN25600_c0_g1_i6;TRINITY_DN25600_c0_g1_i7;TRINITY_DN25600_c0_g1_i8;TRINITY_DN25600_c0_g1_i9	probable carotenoid cleavage dioxygenase 4, chloroplastic [Medicago truncatula]	CCD4	Probable carotenoid cleavage dioxygenase 4, chloroplastic OS=Arabidopsis thaliana GN=CCD4 PE=1 SV=1	GO:0005515(protein binding);GO:0009507(chloroplast);GO:0010287(plastoglobule);GO:0016702(oxidoreductase activity, acting on single donors with incorporation of molecular oxygen, incorporation of two atoms of oxygen);GO:0046872(metal ion binding);GO:0055114(oxidation-reduction process)	COG3670(dioxygenase)	K09840	9-cis-epoxycarotenoid dioxygenase	EC:1.13.11.51	mtr00906(Carotenoid biosynthesis)	G7K3Y7.2 PF03055.13;RPE65;	42.3	339.89	-2.76471	down	4.59015e-09	2.78784e-07	yes
TRINITY_DN22385_c0_g1	2285	TRINITY_DN22385_c0_g1_i1;TRINITY_DN22385_c0_g1_i10;TRINITY_DN22385_c0_g1_i11;TRINITY_DN22385_c0_g1_i12;TRINITY_DN22385_c0_g1_i13;TRINITY_DN22385_c0_g1_i14;TRINITY_DN22385_c0_g1_i2;TRINITY_DN22385_c0_g1_i3;TRINITY_DN22385_c0_g1_i4;TRINITY_DN22385_c0_g1_i5;TRINITY_DN22385_c0_g1_i6;TRINITY_DN22385_c0_g1_i7;TRINITY_DN22385_c0_g1_i8;TRINITY_DN22385_c0_g1_i9	traB domain-containing protein isoform X2 [Medicago truncatula]	-	-	GO:0003674(molecular_function);GO:0008150(biological_process);GO:0009507(chloroplast)	COG1916(traB family)	NA	NA	NA	NA(NA)	G7IAR4.1 PF01963.15;TraB;	47.6	10.53	2.33595	up	4.87476e-09	2.95423e-07	yes
TRINITY_DN17256_c0_g3	731	TRINITY_DN17256_c0_g3_i1;TRINITY_DN17256_c0_g3_i2;TRINITY_DN17256_c0_g3_i3;TRINITY_DN17256_c0_g3_i4	dehydrin HIRD11 [Medicago truncatula]	-	-	-	-	-	-	-	-	-	1180.89	316.49	2.02637	up	5.13045e-09	3.10241e-07	yes
TRINITY_DN14266_c1_g1	358	TRINITY_DN14266_c1_g1_i1;TRINITY_DN14266_c1_g1_i2	-	-	-	-	-	-	-	-	-	-	50.47	331.2	-2.49615	down	5.35196e-09	3.22933e-07	yes
TRINITY_DN20534_c0_g1	1713	TRINITY_DN20534_c0_g1_i1;TRINITY_DN20534_c0_g1_i10;TRINITY_DN20534_c0_g1_i11;TRINITY_DN20534_c0_g1_i12;TRINITY_DN20534_c0_g1_i13;TRINITY_DN20534_c0_g1_i2;TRINITY_DN20534_c0_g1_i3;TRINITY_DN20534_c0_g1_i4;TRINITY_DN20534_c0_g1_i5;TRINITY_DN20534_c0_g1_i6;TRINITY_DN20534_c0_g1_i7;TRINITY_DN20534_c0_g1_i8;TRINITY_DN20534_c0_g1_i9	putative P-loop containing nucleoside triphosphate hydrolase, leucine-rich repeat domain, L [Medicago truncatula]	At5g66900	Probable disease resistance protein At5g66900 OS=Arabidopsis thaliana GN=At5g66900 PE=3 SV=1	GO:0005524(ATP binding);GO:0005634(nucleus);GO:0006952(defense response);GO:0043130(ubiquitin binding);GO:0043531(ADP binding)	COG4886(leucine Rich Repeat)	K13415	protein brassinosteroid insensitive 1	EC:2.7.10.1 2.7.11.1	mdm04075(Plant hormone signal transduction)	G7LFN9.1 PF00931.20;NB-ARC;	619.01	158.63	2.21522	up	5.39381e-09	3.24752e-07	yes
TRINITY_DN12872_c0_g1	1324	TRINITY_DN12872_c0_g1_i1	transmembrane protein 45B [Medicago truncatula]	-	-	GO:0008150(biological_process);GO:0009507(chloroplast);GO:0016021(integral component of membrane)	ENOG4111FW3(Family of unknown function (DUF716) )	NA	NA	NA	NA(NA)	A2Q224.1 PF04819.10;DUF716;	4.04	33.28	-2.83241	down	5.50655e-09	3.30822e-07	yes
TRINITY_DN24302_c0_g1	4791	TRINITY_DN24302_c0_g1_i1	Ty3/gypsy retrotransposon protein [Trifolium pratense]	Tf2-12	Transposon Tf2-12 polyprotein OS=Schizosaccharomyces pombe (strain 972 / ATCC 24843) GN=Tf2-12 PE=3 SV=1	GO:0003887(DNA-directed DNA polymerase activity);GO:0003964(RNA-directed DNA polymerase activity);GO:0004190(aspartic-type endopeptidase activity);GO:0005634(nucleus);GO:0006310(DNA recombination);GO:0015074(DNA integration);GO:0046872(metal ion binding)	COG2801(Retrotransposon protein)	K12349	neutral ceramidase	EC:3.5.1.23	ccaj00600(Sphingolipid metabolism)	A0A0D3C3B2.1 PF00078.25;RVT_1;	0	3.4	-11.5648	down	5.56889e-09	3.33845e-07	yes
TRINITY_DN19804_c0_g1	1067	TRINITY_DN19804_c0_g1_i1;TRINITY_DN19804_c0_g1_i2;TRINITY_DN19804_c0_g1_i3;TRINITY_DN19804_c0_g1_i4;TRINITY_DN19804_c0_g1_i5;TRINITY_DN19804_c0_g1_i6	unknown [Medicago truncatula]	-	-	GO:0003674(molecular_function);GO:0005634(nucleus);GO:0008150(biological_process)	ENOG410ZGXP(Wound-induced protein)	-	-	-	-	I3S705.1 PF12609.6;DUF3774;	6.25	54.33	-2.94842	down	5.83678e-09	3.4915e-07	yes
TRINITY_DN13932_c0_g1	803	TRINITY_DN13932_c0_g1_i1;TRINITY_DN13932_c0_g1_i2;TRINITY_DN13932_c0_g1_i3;TRINITY_DN13932_c0_g1_i4	uncharacterized protein LOC11432357 [Medicago truncatula]	-	-	GO:0003674(molecular_function);GO:0005886(plasma membrane);GO:0008150(biological_process)	ENOG4111AYC(Domain of unknown function (DUF3511))	-	-	-	-	G7IS34.1 PF12023.6;DUF3511;	4.78	43.06	-2.94447	down	5.96767e-09	3.56212e-07	yes
TRINITY_DN26127_c1_g1	2625	TRINITY_DN26127_c1_g1_i1;TRINITY_DN26127_c1_g1_i2;TRINITY_DN26127_c1_g1_i3;TRINITY_DN26127_c1_g1_i4;TRINITY_DN26127_c1_g1_i5;TRINITY_DN26127_c1_g1_i6;TRINITY_DN26127_c1_g1_i7;TRINITY_DN26127_c1_g1_i8;TRINITY_DN26127_c1_g1_i9	protein NRT1/ PTR FAMILY 1.2 isoform X1 [Medicago truncatula]	NPF1.2	Protein NRT1/ PTR FAMILY 1.2 OS=Arabidopsis thaliana GN=NPF1.2 PE=1 SV=1	GO:0005215(transporter activity);GO:0005886(plasma membrane);GO:0006857(oligopeptide transport);GO:0015706(nitrate transport);GO:0016020(membrane);GO:0016021(integral component of membrane);GO:0055085(transmembrane transport);GO:0080054(low-affinity nitrate transmembrane transporter activity)	COG3104(transporter)	NA	NA	NA	NA(NA)	Q2HU48.2 PF00854.19;PTR2;	186.95	40.92	2.39791	up	6.32362e-09	3.76649e-07	yes
TRINITY_DN22135_c0_g2	1937	TRINITY_DN22135_c0_g2_i1;TRINITY_DN22135_c0_g2_i2;TRINITY_DN22135_c0_g2_i3;TRINITY_DN22135_c0_g2_i4;TRINITY_DN22135_c0_g2_i5;TRINITY_DN22135_c0_g2_i6;TRINITY_DN22135_c0_g2_i7	uncharacterized protein LOC11411970 [Medicago truncatula]	lip	Lipase OS=Staphylococcus hyicus GN=lip PE=1 SV=1	GO:0005576(extracellular region);GO:0016021(integral component of membrane);GO:0016787(hydrolase activity)	COG1075(Triacylglycerol Lipase)	NA	NA	NA	NA(NA)	H3SPG0.1 PF12697.5;Abhydrolase_6;	47.36	11.53	1.97148	up	6.37895e-09	3.79131e-07	yes
TRINITY_DN19327_c0_g2	439	TRINITY_DN19327_c0_g2_i1	dehydrin ERD14 [Medicago truncatula]	-	-	GO:0005829(cytosol);GO:0009414(response to water deprivation);GO:0009631(cold acclimation);GO:0009737(response to abscisic acid);GO:0016020(membrane)	ENOG410ZBHP(dehydrin)	-	-	-	-	G7J7R2.1 PF00257.17;Dehydrin;	1028.66	233.85	2.29966	up	6.52501e-09	3.86983e-07	yes
TRINITY_DN21085_c0_g1	1502	TRINITY_DN21085_c0_g1_i1;TRINITY_DN21085_c0_g1_i2;TRINITY_DN21085_c0_g1_i3;TRINITY_DN21085_c0_g1_i4;TRINITY_DN21085_c0_g1_i5;TRINITY_DN21085_c0_g1_i6	putative crocetin glucosyltransferase [Medicago truncatula]	UGT75L6	Crocetin glucosyltransferase, chloroplastic OS=Gardenia jasminoides GN=UGT75L6 PE=1 SV=1	GO:0009813(flavonoid biosynthetic process);GO:0043231(intracellular membrane-bounded organelle);GO:0052696(flavonoid glucuronidation);GO:0080043(quercetin 3-O-glucosyltransferase activity);GO:0080044(quercetin 7-O-glucosyltransferase activity)	COG1819(Transferase)	NA	NA	NA	NA(NA)	A0A072UJF5.1 PF00201.16;UDPGT;	22.28	2.97	3.14359	up	6.56836e-09	3.88293e-07	yes
TRINITY_DN25108_c1_g2	1004	TRINITY_DN25108_c1_g2_i1	-	-	-	-	-	-	-	-	-	-	3.73	0.06	6.05404	up	6.57507e-09	3.88293e-07	yes
TRINITY_DN19984_c0_g2	308	TRINITY_DN19984_c0_g2_i1	-	-	-	-	-	-	-	-	-	-	44.32	1.83	4.73099	up	6.61186e-09	3.89057e-07	yes
TRINITY_DN17255_c0_g3	1478	TRINITY_DN17255_c0_g3_i1;TRINITY_DN17255_c0_g3_i2	glutathione S-transferase U7 [Medicago truncatula]	-	Probable glutathione S-transferase OS=Nicotiana tabacum PE=2 SV=1	GO:0004364(glutathione transferase activity);GO:0005737(cytoplasm);GO:0006749(glutathione metabolic process);GO:0009407(toxin catabolic process)	ENOG410XSIX(glutathione Stransferase)	K00799	glutathione S-transferase	EC:2.5.1.18	mtr00480(Glutathione metabolism)	A0A072UBJ5.1 PF00043.23;GST_C;	30.91	4.85	2.76652	up	6.61604e-09	3.89057e-07	yes
TRINITY_DN17083_c0_g1	842	TRINITY_DN17083_c0_g1_i1;TRINITY_DN17083_c0_g1_i2;TRINITY_DN17083_c0_g1_i3	hypothetical protein TSUD_325970 [Trifolium subterraneum]	-	-	GO:0009507(chloroplast);GO:0016021(integral component of membrane)	ENOG411299P(drought-induced protein 1)	-	-	-	-	-	168.61	45.81	2.04054	up	6.95155e-09	4.07785e-07	yes
TRINITY_DN19013_c0_g2	1650	TRINITY_DN19013_c0_g2_i1;TRINITY_DN19013_c0_g2_i2;TRINITY_DN19013_c0_g2_i3;TRINITY_DN19013_c0_g2_i4	heat shock factor protein HSF24 [Medicago truncatula]	HSF24	Heat shock factor protein HSF24 OS=Solanum peruvianum GN=HSF24 PE=2 SV=1	GO:0005634(nucleus)	COG5169(Transcription factor)	NA	NA	NA	NA(NA)	I3SQU1.1 PF00447.15;HSF_DNA-bind;	144.42	39.09	2.15484	up	6.96391e-09	4.07785e-07	yes
TRINITY_DN21099_c0_g5	1079	TRINITY_DN21099_c0_g5_i1;TRINITY_DN21099_c0_g5_i2;TRINITY_DN21099_c0_g5_i3;TRINITY_DN21099_c0_g5_i4;TRINITY_DN21099_c0_g5_i5;TRINITY_DN21099_c0_g5_i6;TRINITY_DN21099_c0_g5_i7;TRINITY_DN21099_c0_g5_i8;TRINITY_DN21099_c0_g5_i9	hypothetical protein MtrunA17_Chr6g0454011 [Medicago truncatula]	-	-	GO:0007623(circadian rhythm);GO:0009507(chloroplast);GO:0016874(ligase activity)	ENOG410XNS0(NA)	K10755	replication factor C subunit 2/4	-	apro03030(DNA replication);apro03420(Nucleotide excision repair);apro03430(Mismatch repair)	I1LWQ0.2 PF14234.4;DUF4336;	137.1	31.4	2.16812	up	7.03847e-09	4.11284e-07	yes
TRINITY_DN21504_c0_g1	1322	TRINITY_DN21504_c0_g1_i1;TRINITY_DN21504_c0_g1_i10;TRINITY_DN21504_c0_g1_i11;TRINITY_DN21504_c0_g1_i2;TRINITY_DN21504_c0_g1_i3;TRINITY_DN21504_c0_g1_i4;TRINITY_DN21504_c0_g1_i5;TRINITY_DN21504_c0_g1_i6;TRINITY_DN21504_c0_g1_i7;TRINITY_DN21504_c0_g1_i8;TRINITY_DN21504_c0_g1_i9	protein NDH-DEPENDENT CYCLIC ELECTRON FLOW 5 [Medicago truncatula]	NDF5	Protein NDH-DEPENDENT CYCLIC ELECTRON FLOW 5 OS=Arabidopsis thaliana GN=NDF5 PE=2 SV=1	GO:0005887(integral component of plasma membrane);GO:0008519(ammonium transmembrane transporter activity);GO:0015695(organic cation transport);GO:0019740(nitrogen utilization);GO:0072488(ammonium transmembrane transport)	ENOG411201G(NA)	-	-	-	-	-	5.69	29.42	-2.22143	down	7.09245e-09	4.13567e-07	yes
TRINITY_DN23734_c1_g1	1739	TRINITY_DN23734_c1_g1_i1;TRINITY_DN23734_c1_g1_i2;TRINITY_DN23734_c1_g1_i3;TRINITY_DN23734_c1_g1_i4;TRINITY_DN23734_c1_g1_i5;TRINITY_DN23734_c1_g1_i6;TRINITY_DN23734_c1_g1_i7;TRINITY_DN23734_c1_g1_i8	thiamine thiazole synthase, chloroplastic [Medicago truncatula]	THI1	Thiamine thiazole synthase, chloroplastic OS=Citrus sinensis GN=THI1 PE=2 SV=1	GO:0005506(iron ion binding);GO:0005739(mitochondrion);GO:0005829(cytosol);GO:0005886(plasma membrane);GO:0006974(cellular response to DNA damage stimulus);GO:0008270(zinc ion binding);GO:0009228(thiamine biosynthetic process);GO:0009409(response to cold);GO:0009507(chloroplast);GO:0009570(chloroplast stroma);GO:0009579(thylakoid);GO:0009941(chloroplast envelope);GO:0010319(stromule);GO:0018131(o…	COG1635(Involved in biosynthesis of the thiamine precursor thiazole. Catalyzes the conversion of NAD and glycine to adenosine diphosphate 5-(2-hydroxyethyl)-4-methylthiazole-2-carboxylic acid (ADT), an adenylated thiazole intermediate. The reaction includes an iron-dependent sulfide transfer from a conserved cysteine residue of the protein to a thiazole intermediate. The enzyme can only undergo a…	K03146	cysteine-dependent adenosine diphosphate thiazole synthase	EC:2.4.2.60	mtr00730(Thiamine metabolism)	V7BFF7.1 PF01946.15;Thi4;	339.46	1663.78	-2.06216	down	7.24751e-09	4.21723e-07	yes
TRINITY_DN14441_c0_g3	518	TRINITY_DN14441_c0_g3_i1	SAUR-like auxin-responsive family protein [Trifolium pratense]	-	-	GO:0003674(molecular_function);GO:0009733(response to auxin)	-	K14488	SAUR family protein	-	mtr04075(Plant hormone signal transduction)	A0A072VKP3.1 PF02519.12;Auxin_inducible;	53.29	3.53	4.14316	up	7.59471e-09	4.41002e-07	yes
TRINITY_DN12969_c0_g1	2186	TRINITY_DN12969_c0_g1_i1	probable folate-biopterin transporter 9, chloroplastic [Medicago truncatula]	At2g33280	Probable folate-biopterin transporter 9, chloroplastic OS=Arabidopsis thaliana GN=At2g33280 PE=3 SV=2	GO:0005215(transporter activity);GO:0006810(transport);GO:0016020(membrane);GO:0016021(integral component of membrane);GO:0031969(chloroplast membrane)	ENOG410XRKZ(BT1 family)	-	-	-	-	G7IVP1.1 PF03092.14;BT1;	17.19	4.81	2.0013	up	7.75341e-09	4.49277e-07	yes
TRINITY_DN20905_c0_g2	1340	TRINITY_DN20905_c0_g2_i1;TRINITY_DN20905_c0_g2_i2;TRINITY_DN20905_c0_g2_i3;TRINITY_DN20905_c0_g2_i4;TRINITY_DN20905_c0_g2_i5;TRINITY_DN20905_c0_g2_i6;TRINITY_DN20905_c0_g2_i7;TRINITY_DN20905_c0_g2_i8;TRINITY_DN20905_c0_g2_i9	putative peptidase M20 [Medicago truncatula]	ILL1	IAA-amino acid hydrolase ILR1-like 1 OS=Oryza sativa subsp. indica GN=ILL1 PE=2 SV=1	GO:0005788(endoplasmic reticulum lumen);GO:0006508(proteolysis);GO:0008152(metabolic process);GO:0008237(metallopeptidase activity);GO:0009507(chloroplast);GO:0010112(regulation of systemic acquired resistance);GO:0010178(IAA-amino acid conjugate hydrolase activity);GO:0046872(metal ion binding)	COG1473(amidohydrolase)	NA	NA	NA	NA(NA)	G7IRW2.1 PF01546.26;Peptidase_M20;	66.46	13	2.5517	up	8.12108e-09	4.69601e-07	yes
TRINITY_DN15685_c1_g1	1739	TRINITY_DN15685_c1_g1_i1;TRINITY_DN15685_c1_g1_i2;TRINITY_DN15685_c1_g1_i3;TRINITY_DN15685_c1_g1_i4	WAT1-related protein At5g64700 [Medicago truncatula]	At5g64700	WAT1-related protein At5g64700 OS=Arabidopsis thaliana GN=At5g64700 PE=2 SV=1	GO:0005886(plasma membrane);GO:0006810(transport);GO:0022857(transmembrane transporter activity)	ENOG410Y944(EamA-like transporter family)	NA	NA	NA	NA(NA)	G7LC96.1 PF00892.18;EamA;	27.43	6.18	2.22857	up	8.17351e-09	4.71651e-07	yes
TRINITY_DN24775_c0_g1	3259	TRINITY_DN24775_c0_g1_i1;TRINITY_DN24775_c0_g1_i10;TRINITY_DN24775_c0_g1_i2;TRINITY_DN24775_c0_g1_i3;TRINITY_DN24775_c0_g1_i4;TRINITY_DN24775_c0_g1_i5;TRINITY_DN24775_c0_g1_i6;TRINITY_DN24775_c0_g1_i7;TRINITY_DN24775_c0_g1_i8;TRINITY_DN24775_c0_g1_i9	granule-bound starch synthase 2, chloroplastic/amyloplastic [Medicago truncatula]	-	Granule-bound starch synthase 2, chloroplastic/amyloplastic OS=Pisum sativum PE=1 SV=1	GO:0004373(glycogen (starch) synthase activity);GO:0009011(starch synthase activity);GO:0009501(amyloplast);GO:0009507(chloroplast);GO:0010021(amylopectin biosynthetic process);GO:0016757(transferase activity, transferring glycosyl groups);GO:0019252(starch biosynthetic process);GO:0033201(alpha-1,4-glucan synthase activity)	COG0297(starch synthase activity)	K00703	starch synthase	EC:2.4.1.21	mtr00500(Starch and sucrose metabolism)	G7KKU7.2 PF08323.9;Glyco_transf_5;	190.93	33.62	2.49688	up	8.22963e-09	4.73904e-07	yes
TRINITY_DN24738_c0_g1	993	TRINITY_DN24738_c0_g1_i1	-	-	-	-	-	-	-	-	-	-	6.69	0.27	4.74948	up	8.33401e-09	4.78921e-07	yes
TRINITY_DN21329_c0_g3	724	TRINITY_DN21329_c0_g3_i1;TRINITY_DN21329_c0_g3_i2;TRINITY_DN21329_c0_g3_i3	hypothetical protein D0Y65_024772, partial [Glycine soja]	-	-	GO:0005739(mitochondrion);GO:0008150(biological_process)	ENOG410YD1C(zinc-binding protein)	-	-	-	-	-	244.54	74.72	1.87085	up	8.57668e-09	4.91848e-07	yes
TRINITY_DN15796_c0_g1	2056	TRINITY_DN15796_c0_g1_i1;TRINITY_DN15796_c0_g1_i10;TRINITY_DN15796_c0_g1_i2;TRINITY_DN15796_c0_g1_i3;TRINITY_DN15796_c0_g1_i4;TRINITY_DN15796_c0_g1_i5;TRINITY_DN15796_c0_g1_i6;TRINITY_DN15796_c0_g1_i7;TRINITY_DN15796_c0_g1_i8;TRINITY_DN15796_c0_g1_i9	Alpha-1,4 glucan phosphorylase L isozyme, chloroplastic/amyloplastic [Medicago truncatula]	PHO1	Alpha-1,4 glucan phosphorylase L isozyme, chloroplastic/amyloplastic OS=Vicia faba GN=PHO1 PE=2 SV=2	GO:0005737(cytoplasm);GO:0005980(glycogen catabolic process);GO:0008184(glycogen phosphorylase activity);GO:0030170(pyridoxal phosphate binding)	COG0058(Phosphorylase is an important allosteric enzyme in carbohydrate metabolism. Enzymes from different sources differ in their regulatory mechanisms and in their natural substrates. However, all known phosphorylases share catalytic and structural properties (By similarity))	K00688	glycogen phosphorylase	EC:2.4.1.1	cam00500(Starch and sucrose metabolism)	I1LWR4.1 PF00343.18;Phosphorylase;	9.03	41.09	-2.12708	down	8.86319e-09	5.07231e-07	yes
TRINITY_DN14413_c0_g1	1483	TRINITY_DN14413_c0_g1_i1;TRINITY_DN14413_c0_g1_i2	putative F-box domain-containing protein [Medicago truncatula]	At4g00755	F-box protein At4g00755 OS=Arabidopsis thaliana GN=At4g00755 PE=2 SV=1	GO:0003674(molecular_function);GO:0005634(nucleus);GO:0008150(biological_process)	ENOG4111I2N(F-box protein)	-	-	-	-	-	0.04	3.26	-5.93439	down	9.02147e-09	5.15226e-07	yes
TRINITY_DN19917_c0_g1	794	TRINITY_DN19917_c0_g1_i1;TRINITY_DN19917_c0_g1_i2;TRINITY_DN19917_c0_g1_i3;TRINITY_DN19917_c0_g1_i4;TRINITY_DN19917_c0_g1_i5;TRINITY_DN19917_c0_g1_i6;TRINITY_DN19917_c0_g1_i7;TRINITY_DN19917_c0_g1_i8;TRINITY_DN19917_c0_g1_i9	hypothetical protein MTR_4g051568 [Medicago truncatula]	-	-	-	-	-	-	-	-	-	119.92	17.63	3.73912	up	9.34522e-09	5.3262e-07	yes
TRINITY_DN20595_c0_g1	468	TRINITY_DN20595_c0_g1_i1;TRINITY_DN20595_c0_g1_i2;TRINITY_DN20595_c0_g1_i3;TRINITY_DN20595_c0_g1_i4;TRINITY_DN20595_c0_g1_i5;TRINITY_DN20595_c0_g1_i6	HSP70 [Medicago ruthenica]	MED37E	Probable mediator of RNA polymerase II transcription subunit 37e OS=Arabidopsis thaliana GN=MED37E PE=1 SV=3	GO:0002020(protease binding);GO:0005515(protein binding);GO:0005524(ATP binding);GO:0005618(cell wall);GO:0005634(nucleus);GO:0005730(nucleolus);GO:0005737(cytoplasm);GO:0005774(vacuolar membrane);GO:0005794(Golgi apparatus);GO:0005829(cytosol);GO:0005886(plasma membrane);GO:0006351(transcription, DNA-templated);GO:0006355(regulation of transcription, DNA-templated);GO:0006457(protein folding);GO…	COG0443(Heat shock protein)	K03283	heat shock 70kDa protein 1/2/6/8	-	mtr03040(Spliceosome);mtr04141(Protein processing in endoplasmic reticulum);mtr04144(Endocytosis)	A0A078FNZ5.1 PF00012.18;HSP70;	366.82	98.92	1.98509	up	9.47609e-09	5.38972e-07	yes
TRINITY_DN21228_c0_g1	1162	TRINITY_DN21228_c0_g1_i1	transcription factor bHLH63 isoform X2 [Medicago truncatula]	BHLH63	Transcription factor bHLH63 OS=Arabidopsis thaliana GN=BHLH63 PE=1 SV=1	GO:0003677(DNA binding);GO:0003700(DNA binding transcription factor activity);GO:0005515(protein binding);GO:0005634(nucleus);GO:0006351(transcription, DNA-templated);GO:0006355(regulation of transcription, DNA-templated);GO:0009637(response to blue light);GO:0009908(flower development);GO:0009911(positive regulation of flower development);GO:0046983(protein dimerization activity)	ENOG410YGAM(Transcription factor)	NA	NA	NA	NA(NA)	M5VVW1.1 PF00010.24;HLH;	2.29	33.36	-3.63346	down	9.87816e-09	5.60692e-07	yes
TRINITY_DN24404_c0_g2	2117	TRINITY_DN24404_c0_g2_i1;TRINITY_DN24404_c0_g2_i2;TRINITY_DN24404_c0_g2_i3	beta-amylase 3, chloroplastic [Medicago truncatula]	BAM3	Beta-amylase 3, chloroplastic OS=Arabidopsis thaliana GN=BAM3 PE=1 SV=3	GO:0000024(maltose biosynthetic process);GO:0005983(starch catabolic process);GO:0009409(response to cold);GO:0009507(chloroplast);GO:0009570(chloroplast stroma);GO:0016161(beta-amylase activity);GO:0102229(amylopectin maltohydrolase activity)	ENOG410XRH5(beta-amylase)	K01177	beta-amylase	EC:3.2.1.2	gmx00500(Starch and sucrose metabolism)	A0A072UP17.1 PF01373.15;Glyco_hydro_14;	169.6	32.76	2.54829	up	9.94619e-09	5.63401e-07	yes
TRINITY_DN23281_c1_g1	1557	TRINITY_DN23281_c1_g1_i1;TRINITY_DN23281_c1_g1_i10;TRINITY_DN23281_c1_g1_i2;TRINITY_DN23281_c1_g1_i3;TRINITY_DN23281_c1_g1_i4;TRINITY_DN23281_c1_g1_i5;TRINITY_DN23281_c1_g1_i6;TRINITY_DN23281_c1_g1_i7;TRINITY_DN23281_c1_g1_i8;TRINITY_DN23281_c1_g1_i9	Cysteine proteinase 15A [Medicago truncatula]	-	Cysteine proteinase 15A OS=Pisum sativum PE=2 SV=1	GO:0004197(cysteine-type endopeptidase activity);GO:0005615(extracellular space);GO:0005764(lysosome);GO:0051603(proteolysis involved in cellular protein catabolic process)	COG4870(cathepsin)	NA	NA	NA	NA(NA)	G7I5V9.1 PF00112.21;Peptidase_C1;	265.32	1371.8	-2.25909	down	1.00842e-08	5.70053e-07	yes
TRINITY_DN22023_c0_g3	1226	TRINITY_DN22023_c0_g3_i1;TRINITY_DN22023_c0_g3_i2	probable glutathione S-transferase [Medicago truncatula]	HSP26-A	Probable glutathione S-transferase OS=Glycine max GN=HSP26-A PE=2 SV=1	GO:0004364(glutathione transferase activity);GO:0005737(cytoplasm);GO:0006749(glutathione metabolic process);GO:0009407(toxin catabolic process)	ENOG410XSIX(glutathione Stransferase)	K00799	glutathione S-transferase	EC:2.5.1.18	mtr00480(Glutathione metabolism)	G7L6I2.1 PF00043.23;GST_C;	44.93	2.87	4.14059	up	1.06866e-08	6.02881e-07	yes
TRINITY_DN22440_c1_g2	1012	TRINITY_DN22440_c1_g2_i1;TRINITY_DN22440_c1_g2_i10;TRINITY_DN22440_c1_g2_i11;TRINITY_DN22440_c1_g2_i12;TRINITY_DN22440_c1_g2_i2;TRINITY_DN22440_c1_g2_i3;TRINITY_DN22440_c1_g2_i4;TRINITY_DN22440_c1_g2_i5;TRINITY_DN22440_c1_g2_i6;TRINITY_DN22440_c1_g2_i7;TRINITY_DN22440_c1_g2_i8;TRINITY_DN22440_c1_g2_i9	CBL-interacting kinase [Medicago truncatula]	CIPK1	CBL-interacting serine/threonine-protein kinase 1 OS=Arabidopsis thaliana GN=CIPK1 PE=1 SV=2	GO:0004674(protein serine/threonine kinase activity);GO:0005634(nucleus);GO:0005737(cytoplasm);GO:0006468(protein phosphorylation);GO:0035556(intracellular signal transduction)	COG0515(Serine Threonine protein kinase)	NA	NA	NA	NA(NA)	G7IQG8.1 PF03822.12;NAF;	219.36	47.67	2.29642	up	1.07208e-08	6.03582e-07	yes
TRINITY_DN11879_c0_g1	749	TRINITY_DN11879_c0_g1_i1;TRINITY_DN11879_c0_g1_i2;TRINITY_DN11879_c0_g1_i3;TRINITY_DN11879_c0_g1_i4	uncharacterized protein LOC11422490 [Medicago truncatula]	-	-	GO:0003674(molecular_function);GO:0008150(biological_process);GO:0009507(chloroplast)	ENOG410YH1N(PAR1 protein)	-	-	-	-	G7JR78.1 PF06521.9;PAR1;	175.43	25.64	2.92386	up	1.098e-08	6.16925e-07	yes
TRINITY_DN23812_c0_g2	2148	TRINITY_DN23812_c0_g2_i1;TRINITY_DN23812_c0_g2_i2;TRINITY_DN23812_c0_g2_i3;TRINITY_DN23812_c0_g2_i4;TRINITY_DN23812_c0_g2_i5;TRINITY_DN23812_c0_g2_i6;TRINITY_DN23812_c0_g2_i7;TRINITY_DN23812_c0_g2_i8	fructose-bisphosphate aldolase-lysine N-methyltransferase, chloroplastic [Medicago truncatula]	SDG40	Protein SET DOMAIN GROUP 40 OS=Arabidopsis thaliana GN=SDG40 PE=2 SV=1	GO:0016279(protein-lysine N-methyltransferase activity);GO:0018026(peptidyl-lysine monomethylation)	ENOG410Y7DR(set domain containing)	K19199	histone-lysine N-methyltransferase SETD3	EC:2.1.1.43	smo00310(Lysine degradation)	G7KNL1.1 PF09273.9;Rubis-subs-bind;	10.27	44.62	-1.903	down	1.10188e-08	6.17855e-07	yes
TRINITY_DN20036_c0_g1	1161	TRINITY_DN20036_c0_g1_i1;TRINITY_DN20036_c0_g1_i2;TRINITY_DN20036_c0_g1_i3;TRINITY_DN20036_c0_g1_i4;TRINITY_DN20036_c0_g1_i5;TRINITY_DN20036_c0_g1_i6;TRINITY_DN20036_c0_g1_i7	uncharacterized protein LOC11434429 [Medicago truncatula]	-	-	-	ENOG410Z1R9(NA)	-	-	-	-	-	11.95	85.21	-2.36215	down	1.2042e-08	6.73865e-07	yes
TRINITY_DN19422_c0_g1	1541	TRINITY_DN19422_c0_g1_i1;TRINITY_DN19422_c0_g1_i2;TRINITY_DN19422_c0_g1_i3;TRINITY_DN19422_c0_g1_i4;TRINITY_DN19422_c0_g1_i5	RING-H2 finger protein ATL2 [Medicago truncatula]	ATL2	RING-H2 finger protein ATL2 OS=Arabidopsis thaliana GN=ATL2 PE=2 SV=2	GO:0005634(nucleus);GO:0006952(defense response);GO:0008270(zinc ion binding);GO:0010200(response to chitin);GO:0016021(integral component of membrane);GO:0016567(protein ubiquitination);GO:0043161(proteasome-mediated ubiquitin-dependent protein catabolic process);GO:0046872(metal ion binding);GO:0061630(ubiquitin protein ligase activity)	ENOG41121N2(zinc ion binding)	NA	NA	NA	NA(NA)	A0A0R4J3Y8.1 PF13639.4;zf-RING_2;	57.63	18.08	2.01787	up	1.20902e-08	6.75201e-07	yes
TRINITY_DN18216_c0_g4	1972	TRINITY_DN18216_c0_g4_i1;TRINITY_DN18216_c0_g4_i2;TRINITY_DN18216_c0_g4_i3	LOW QUALITY PROTEIN: CBL-interacting serine/threonine-protein kinase 12 [Medicago truncatula]	CIPK12	CBL-interacting serine/threonine-protein kinase 12 OS=Arabidopsis thaliana GN=CIPK12 PE=1 SV=1	GO:0005515(protein binding)	COG0515(Serine Threonine protein kinase)	NA	NA	NA	NA(NA)	A0A072TUY9.1 PF00069.23;Pkinase;	226.73	62.12	2.14965	up	1.22492e-08	6.82706e-07	yes
TRINITY_DN13443_c0_g1	986	TRINITY_DN13443_c0_g1_i1	late embryogenesis abundant protein [Medicago truncatula]	-	-	GO:0003674(molecular_function);GO:0005886(plasma membrane);GO:0008150(biological_process);GO:0016021(integral component of membrane)	ENOG410YMTZ(harpin-induced protein 1 domain containing protein)	-	-	-	-	A0A072TPL5.1 PF03168.11;LEA_2;	80.41	5.48	4.05018	up	1.24701e-08	6.93625e-07	yes
TRINITY_DN25118_c0_g1	2584	TRINITY_DN25118_c0_g1_i1;TRINITY_DN25118_c0_g1_i2;TRINITY_DN25118_c0_g1_i3;TRINITY_DN25118_c0_g1_i4;TRINITY_DN25118_c0_g1_i5	pentatricopeptide repeat-containing protein At5g50280, chloroplastic [Medicago truncatula]	EMB1006	Pentatricopeptide repeat-containing protein At5g50280, chloroplastic OS=Arabidopsis thaliana GN=EMB1006 PE=2 SV=1	GO:0003723(RNA binding);GO:0004519(endonuclease activity);GO:0009451(RNA modification);GO:0009507(chloroplast);GO:0009793(embryo development ending in seed dormancy);GO:0043231(intracellular membrane-bounded organelle)	ENOG410Z7Z7(Pentatricopeptide repeat-containing protein)	-	-	-	-	I1LPX7.1 PF13041.4;PPR_2;	4.38	21.23	-1.89126	down	1.25194e-08	6.94979e-07	yes
TRINITY_DN24894_c1_g2	1087	TRINITY_DN24894_c1_g2_i1;TRINITY_DN24894_c1_g2_i2;TRINITY_DN24894_c1_g2_i3	UDP-glucose flavonoid 3-O-glucosyltransferase 7 [Medicago truncatula]	UGT73B4	UDP-glycosyltransferase 73B4 OS=Arabidopsis thaliana GN=UGT73B4 PE=2 SV=1	GO:0009813(flavonoid biosynthetic process);GO:0043231(intracellular membrane-bounded organelle);GO:0052696(flavonoid glucuronidation);GO:0080043(quercetin 3-O-glucosyltransferase activity);GO:0080044(quercetin 7-O-glucosyltransferase activity)	COG1819(Transferase)	K00699	glucuronosyltransferase	EC:2.4.1.17	gmx00040(Pentose and glucuronate interconversions);gmx00053(Ascorbate and aldarate metabolism);gmx00860(Porphyrin and chlorophyll metabolism)	G7K602.1 PF00201.16;UDPGT;	656.92	117.39	2.89843	up	1.36687e-08	7.57261e-07	yes
TRINITY_DN19844_c0_g3	659	TRINITY_DN19844_c0_g3_i1;TRINITY_DN19844_c0_g3_i2	senescence-inducible chloroplast stay-green protein [Medicago truncatula]	SGR	Protein STAY-GREEN, chloroplastic OS=Pisum sativum GN=SGR PE=2 SV=1	GO:0009507(chloroplast);GO:0010271(regulation of chlorophyll catabolic process)	ENOG4111UAI(Senescence-inducible chloroplast stay-green protein)	K22013	magnesium dechelatase	EC:4.99.1.10	mtr00860(Porphyrin and chlorophyll metabolism)	V7CNE3.1 PF12638.5;Staygreen;	104.94	22.15	2.41594	up	1.38436e-08	7.65426e-07	yes
TRINITY_DN10430_c0_g1	577	TRINITY_DN10430_c0_g1_i1	hypothetical protein MtrunA17_Chr3g0134371 [Medicago truncatula]	-	-	-	-	-	-	-	-	-	13.52	0.34	5.42576	up	1.41193e-08	7.79118e-07	yes
TRINITY_DN13504_c0_g1	1901	TRINITY_DN13504_c0_g1_i1;TRINITY_DN13504_c0_g1_i2	protein MARD1 [Medicago truncatula]	MARD1	Protein MARD1 OS=Arabidopsis thaliana GN=MARD1 PE=2 SV=2	GO:0003674(molecular_function);GO:0005634(nucleus)	ENOG41105YW(Protein of unknown function (DUF581))	-	-	-	-	A0A072U257.1 PF04570.12;zf-FLZ;	0.17	8.44	-5.38988	down	1.42746e-08	7.86121e-07	yes
TRINITY_DN12638_c0_g1	624	TRINITY_DN12638_c0_g1_i1;TRINITY_DN12638_c0_g1_i2;TRINITY_DN12638_c0_g1_i3;TRINITY_DN12638_c0_g1_i4	probable leucine-rich repeat receptor-like protein kinase At5g63930 isoform X1 [Medicago truncatula]	PXC3	Leucine-rich repeat receptor-like tyrosine-protein kinase PXC3 OS=Arabidopsis thaliana GN=PXC3 PE=2 SV=1	GO:0004672(protein kinase activity);GO:0005524(ATP binding);GO:0005886(plasma membrane);GO:0006468(protein phosphorylation);GO:0016021(integral component of membrane)	COG4886(leucine Rich Repeat)	NA	NA	NA	NA(NA)	A0A072VP05.1 PF07714.15;Pkinase_Tyr;	94.57	22.76	2.24099	up	1.46384e-08	8.04559e-07	yes
TRINITY_DN24056_c0_g1	3286	TRINITY_DN24056_c0_g1_i1;TRINITY_DN24056_c0_g1_i2;TRINITY_DN24056_c0_g1_i3;TRINITY_DN24056_c0_g1_i4;TRINITY_DN24056_c0_g1_i5;TRINITY_DN24056_c0_g1_i6;TRINITY_DN24056_c0_g1_i7;TRINITY_DN24056_c0_g1_i8	uncharacterized protein LOC11443162 isoform X4 [Medicago truncatula]	-	-	GO:0003676(nucleic acid binding);GO:0003677(DNA binding);GO:0005634(nucleus);GO:0006355(regulation of transcription, DNA-templated);GO:0006368(transcription elongation from RNA polymerase II promoter);GO:0008270(zinc ion binding);GO:0016570(histone modification);GO:0016593(Cdc73/Paf1 complex);GO:0040007(growth);GO:1990269(RNA polymerase II C-terminal domain phosphoserine binding)	ENOG41126D0(Plus-3 domain)	K02958	small subunit ribosomal protein S15e	-	thj03010(Ribosome)	G7K528.2 PF03126.16;Plus-3;	53.01	16.19	1.87202	up	1.50941e-08	8.2704e-07	yes
TRINITY_DN21471_c0_g1	2216	TRINITY_DN21471_c0_g1_i1;TRINITY_DN21471_c0_g1_i2;TRINITY_DN21471_c0_g1_i3;TRINITY_DN21471_c0_g1_i4	ATP-dependent zinc metalloprotease FTSH 6, chloroplastic [Medicago truncatula]	FTSH6	ATP-dependent zinc metalloprotease FTSH 6, chloroplastic OS=Arabidopsis thaliana GN=FTSH6 PE=2 SV=1	GO:0004176(ATP-dependent peptidase activity);GO:0005739(mitochondrion);GO:0006508(proteolysis);GO:0008237(metallopeptidase activity);GO:0009535(chloroplast thylakoid membrane);GO:0009941(chloroplast envelope);GO:0010027(thylakoid membrane organization);GO:0010205(photoinhibition);GO:0010206(photosystem II repair);GO:0010304(PSII associated light-harvesting complex II catabolic process)	COG0465(Acts as a processive, ATP-dependent zinc metallopeptidase for both cytoplasmic and membrane proteins. Plays a role in the quality control of integral membrane proteins (By similarity))	NA	NA	NA	NA(NA)	G7L1Y9.1 PF01434.16;Peptidase_M41;	4.53	0.25	4.43248	up	1.5107e-08	8.2704e-07	yes
TRINITY_DN22325_c1_g1	2704	TRINITY_DN22325_c1_g1_i1;TRINITY_DN22325_c1_g1_i2	LOW QUALITY PROTEIN: centrosome-associated protein CEP250 [Medicago truncatula]	-	-	-	ENOG4111PE7(NA)	-	-	-	-	-	44.55	12.49	2.01037	up	1.52208e-08	8.3163e-07	yes
TRINITY_DN19765_c0_g2	2026	TRINITY_DN19765_c0_g2_i1;TRINITY_DN19765_c0_g2_i2;TRINITY_DN19765_c0_g2_i3	putative laccase [Medicago truncatula]	LAC5	Laccase-5 OS=Arabidopsis thaliana GN=LAC5 PE=2 SV=1	GO:0005507(copper ion binding);GO:0016722(oxidoreductase activity, oxidizing metal ions)	COG2132(Multicopper oxidase)	NA	NA	NA	NA(NA)	G7J2E1.2 PF00394.20;Cu-oxidase;	4.12	35.11	-2.91291	down	1.60437e-08	8.74869e-07	yes
TRINITY_DN14042_c0_g1	2349	TRINITY_DN14042_c0_g1_i1;TRINITY_DN14042_c0_g1_i2	protein PLASTID MOVEMENT IMPAIRED 1 [Medicago truncatula]	PMI1	Protein PLASTID MOVEMENT IMPAIRED 1 OS=Arabidopsis thaliana GN=PMI1 PE=1 SV=1	GO:0005622(intracellular);GO:0005623(cell);GO:0005829(cytosol);GO:0005886(plasma membrane);GO:0006970(response to osmotic stress);GO:0009507(chloroplast);GO:0009637(response to blue light);GO:0009738(abscisic acid-activated signaling pathway);GO:0009787(regulation of abscisic acid-activated signaling pathway);GO:0009902(chloroplast relocation);GO:0009903(chloroplast avoidance movement);GO:0010029…	ENOG410Y932(NA)	-	-	-	-	A0A072UBY1.1 PF10358.7;NT-C2;	37.79	10.9	1.98103	up	1.61061e-08	8.76551e-07	yes
TRINITY_DN25459_c0_g1	2760	TRINITY_DN25459_c0_g1_i1;TRINITY_DN25459_c0_g1_i2;TRINITY_DN25459_c0_g1_i3;TRINITY_DN25459_c0_g1_i4;TRINITY_DN25459_c0_g1_i5;TRINITY_DN25459_c0_g1_i6;TRINITY_DN25459_c0_g1_i7	membrane protein of ER body-like protein isoform X1 [Medicago truncatula]	MEBL	Membrane protein of ER body-like protein OS=Arabidopsis thaliana GN=MEBL PE=2 SV=1	GO:0005381(iron ion transmembrane transporter activity);GO:0005384(manganese ion transmembrane transporter activity);GO:0005783(endoplasmic reticulum);GO:0006880(intracellular sequestering of iron ion);GO:0010168(ER body);GO:0016020(membrane);GO:0030026(cellular manganese ion homeostasis);GO:0071281(cellular response to iron ion);GO:0071421(manganese ion transmembrane transport)	ENOG41129ND(VIT family)	-	-	-	-	-	36.75	6.09	2.66155	up	1.68178e-08	9.13491e-07	yes
TRINITY_DN26033_c0_g5	1237	TRINITY_DN26033_c0_g5_i1	uncharacterized protein LOC25489736 [Medicago truncatula]	-	-	GO:0003674(molecular_function);GO:0005634(nucleus);GO:0008150(biological_process)	ENOG41115EZ(NA)	-	-	-	-	-	30.13	7.69	2.15911	up	1.68514e-08	9.13531e-07	yes
TRINITY_DN17734_c0_g7	652	TRINITY_DN17734_c0_g7_i1	probable calcium-binding protein CML23 [Medicago truncatula]	CML25	Probable calcium-binding protein CML25 OS=Arabidopsis thaliana GN=CML25 PE=2 SV=1	GO:0005509(calcium ion binding)	COG5126(Calcium-binding protein)	K13448	calcium-binding protein CML	-	han04626(Plant-pathogen interaction)	A0A072TNQ1.1 PF13499.4;EF-hand_7;	4.93	41.62	-2.8865	down	1.73664e-08	9.38935e-07	yes
TRINITY_DN13044_c0_g1	320	TRINITY_DN13044_c0_g1_i1;TRINITY_DN13044_c0_g1_i2	hypothetical protein TSUD_120010 [Trifolium subterraneum]	-	-	-	ENOG410Z3R4(NA)	-	-	-	-	-	247.9	72.56	1.98014	up	1.73877e-08	9.38935e-07	yes
TRINITY_DN21595_c0_g1	1942	TRINITY_DN21595_c0_g1_i1;TRINITY_DN21595_c0_g1_i10;TRINITY_DN21595_c0_g1_i11;TRINITY_DN21595_c0_g1_i12;TRINITY_DN21595_c0_g1_i13;TRINITY_DN21595_c0_g1_i14;TRINITY_DN21595_c0_g1_i2;TRINITY_DN21595_c0_g1_i3;TRINITY_DN21595_c0_g1_i4;TRINITY_DN21595_c0_g1_i5;TRINITY_DN21595_c0_g1_i6;TRINITY_DN21595_c0_g1_i7;TRINITY_DN21595_c0_g1_i8;TRINITY_DN21595_c0_g1_i9	uncharacterized protein LOC11410928 [Medicago truncatula]	-	Lipase OS=Rhizopus niveus PE=1 SV=1	GO:0004806(triglyceride lipase activity);GO:0005576(extracellular region);GO:0006629(lipid metabolic process)	COG3675(Lipase class 3 family protein)	-	-	-	-	G7K6N4.1 PF01764.23;Lipase_3;	609.51	88.57	2.75376	up	1.87867e-08	1.01251e-06	yes
TRINITY_DN24098_c2_g1	1561	TRINITY_DN24098_c2_g1_i1;TRINITY_DN24098_c2_g1_i2;TRINITY_DN24098_c2_g1_i3;TRINITY_DN24098_c2_g1_i4;TRINITY_DN24098_c2_g1_i5	ethylene-responsive transcription factor ERF118 [Medicago truncatula]	ERF118	Ethylene-responsive transcription factor ERF118 OS=Arabidopsis thaliana GN=ERF118 PE=2 SV=1	GO:0003677(DNA binding);GO:0003700(DNA binding transcription factor activity);GO:0005634(nucleus);GO:0006351(transcription, DNA-templated);GO:0006355(regulation of transcription, DNA-templated);GO:0009873(ethylene-activated signaling pathway)	ENOG410Z04J(Transcription factor)	K13434	pathogenesis-related genes transcriptional activator PTI6	-	sly04626(Plant-pathogen interaction)	G7L9Z0.2 PF00847.18;AP2;	62.25	15.37	2.37766	up	1.89472e-08	1.01918e-06	yes
TRINITY_DN18790_c0_g1	1339	TRINITY_DN18790_c0_g1_i1;TRINITY_DN18790_c0_g1_i2;TRINITY_DN18790_c0_g1_i3	uncharacterized protein LOC11421489 [Medicago truncatula]	mrnC	Mini-ribonuclease 3 OS=Synechocystis sp. (strain PCC 6803 / Kazusa) GN=mrnC PE=3 SV=1	GO:0000476(maturation of 4.5S rRNA);GO:0000967(rRNA 5'-end processing);GO:0005634(nucleus);GO:0009507(chloroplast);GO:0034470(ncRNA processing)	COG1939(Involved in correct processing of both the 5' and 3' ends of 23S rRNA precursor. Processes 30S rRNA precursor transcript even in absence of ribonuclease 3 (Rnc))	NA	NA	NA	NA(NA)	A0A072VD47.1 PF00636.24;Ribonuclease_3;	1.66	13.42	-2.82466	down	1.89968e-08	1.01987e-06	yes
TRINITY_DN13471_c0_g1	1715	TRINITY_DN13471_c0_g1_i1	uncharacterized protein At5g39865 [Medicago truncatula]	At5g39865	Uncharacterized protein At5g39865 OS=Arabidopsis thaliana GN=At5g39865 PE=2 SV=1	GO:0005634(nucleus);GO:0009055(electron transfer activity);GO:0015035(protein disulfide oxidoreductase activity);GO:0045454(cell redox homeostasis)	ENOG4111HAI(Glutaredoxin)	NA	NA	NA	NA(NA)	A2Q2Z6.1 PF00462.22;Glutaredoxin;	0.88	9.32	-3.19958	down	1.91997e-08	1.02878e-06	yes
TRINITY_DN23102_c0_g1	3409	TRINITY_DN23102_c0_g1_i1;TRINITY_DN23102_c0_g1_i2;TRINITY_DN23102_c0_g1_i3	OSBP(oxysterol-binding protein)-related protein 1C [Medicago truncatula]	ORP1D	Oxysterol-binding protein-related protein 1D OS=Arabidopsis thaliana GN=ORP1D PE=2 SV=1	GO:0005634(nucleus);GO:0006869(lipid transport);GO:0007165(signal transduction);GO:0008142(oxysterol binding);GO:0008202(steroid metabolic process);GO:0008289(lipid binding);GO:0035091(phosphatidylinositol binding)	ENOG410XP9E(Oxysterol-binding protein)	NA	NA	NA	NA(NA)	G7J2L8.1 PF01237.16;Oxysterol_BP;	3.92	17.33	-1.9305	down	1.95726e-08	1.04674e-06	yes
TRINITY_DN25822_c0_g3	954	TRINITY_DN25822_c0_g3_i1;TRINITY_DN25822_c0_g3_i2;TRINITY_DN25822_c0_g3_i3;TRINITY_DN25822_c0_g3_i4	copia-type polyprotein, partial [Trifolium pratense]	-	-	-	ENOG410ZXEB(Integrase core domain)	K01051	pectinesterase	EC:3.1.1.11	cam00040(Pentose and glucuronate interconversions)	-	2.86	23.31	-2.80398	down	2.05637e-08	1.09647e-06	yes
TRINITY_DN25585_c1_g2	2519	TRINITY_DN25585_c1_g2_i1;TRINITY_DN25585_c1_g2_i2;TRINITY_DN25585_c1_g2_i3;TRINITY_DN25585_c1_g2_i4;TRINITY_DN25585_c1_g2_i5	two-component response regulator-like APRR1 [Medicago truncatula]	APRR1	Two-component response regulator-like APRR1 OS=Arabidopsis thaliana GN=APRR1 PE=1 SV=1	GO:0000156(phosphorelay response regulator activity);GO:0000160(phosphorelay signal transduction system);GO:0003677(DNA binding);GO:0003700(DNA binding transcription factor activity);GO:0005515(protein binding);GO:0005634(nucleus);GO:0006351(transcription, DNA-templated);GO:0006355(regulation of transcription, DNA-templated);GO:0007623(circadian rhythm);GO:0009908(flower development);GO:0010031(c…	COG5641(Transcription factor)	K12127	pseudo-response regulator 1	-	mtr04712(Circadian rhythm - plant)	A0A072V5J5.1 PF00072.22;Response_reg;	1.05	7.57	-2.68521	down	2.05816e-08	1.09647e-06	yes
TRINITY_DN19796_c0_g1	1822	TRINITY_DN19796_c0_g1_i1;TRINITY_DN19796_c0_g1_i2;TRINITY_DN19796_c0_g1_i3;TRINITY_DN19796_c0_g1_i4;TRINITY_DN19796_c0_g1_i5	hypothetical protein TSUD_205570 [Trifolium subterraneum]	WRKY11	Probable WRKY transcription factor 11 OS=Arabidopsis thaliana GN=WRKY11 PE=2 SV=2	GO:0003700(DNA binding transcription factor activity);GO:0005516(calmodulin binding);GO:0005634(nucleus);GO:0006351(transcription, DNA-templated);GO:0006355(regulation of transcription, DNA-templated);GO:0010200(response to chitin);GO:0042742(defense response to bacterium);GO:0043565(sequence-specific DNA binding)	ENOG410YD1E(WRKY transcription factor)	K13425	WRKY transcription factor 22	-	han04016(MAPK signaling pathway - plant);han04626(Plant-pathogen interaction)	M5XW42.1 PF03106.13;WRKY;	120.41	39.53	1.88989	up	2.07892e-08	1.10541e-06	yes
TRINITY_DN24596_c1_g1	1923	TRINITY_DN24596_c1_g1_i1;TRINITY_DN24596_c1_g1_i2;TRINITY_DN24596_c1_g1_i3;TRINITY_DN24596_c1_g1_i4;TRINITY_DN24596_c1_g1_i5	xylose isomerase [Medicago truncatula]	XYLA	Xylose isomerase OS=Arabidopsis thaliana GN=XYLA PE=2 SV=2	GO:0005737(cytoplasm);GO:0016020(membrane)	COG2115(Xylose isomerase)	K01805	xylose isomerase	EC:5.3.1.5	mtr00040(Pentose and glucuronate interconversions);mtr00051(Fructose and mannose metabolism)	W1SHL5.1 PF01261.22;AP_endonuc_2;	22.02	95.86	-1.94472	down	2.10324e-08	1.1162e-06	yes
TRINITY_DN22485_c0_g3	1038	TRINITY_DN22485_c0_g3_i1;TRINITY_DN22485_c0_g3_i2;TRINITY_DN22485_c0_g3_i3;TRINITY_DN22485_c0_g3_i4	transcription factor bHLH18 [Medicago truncatula]	BHLH25	Transcription factor bHLH25 OS=Arabidopsis thaliana GN=BHLH25 PE=2 SV=2	GO:0003677(DNA binding);GO:0003700(DNA binding transcription factor activity);GO:0005634(nucleus);GO:0006351(transcription, DNA-templated);GO:0006355(regulation of transcription, DNA-templated);GO:0046983(protein dimerization activity)	-	K13422	transcription factor MYC2	-	dct04016(MAPK signaling pathway - plant);dct04075(Plant hormone signal transduction)	G7JFN8.2 PF00010.24;HLH;	246.28	45.41	2.59701	up	2.18285e-08	1.15624e-06	yes
TRINITY_DN17250_c0_g4	673	TRINITY_DN17250_c0_g4_i1	hypothetical protein MTR_5g095190 [Medicago truncatula]	-	-	-	-	-	-	-	-	-	0.03	20.32	-8.88998	down	2.22599e-08	1.17469e-06	yes
TRINITY_DN17386_c0_g1	1989	TRINITY_DN17386_c0_g1_i1;TRINITY_DN17386_c0_g1_i2;TRINITY_DN17386_c0_g1_i3;TRINITY_DN17386_c0_g1_i4;TRINITY_DN17386_c0_g1_i5;TRINITY_DN17386_c0_g1_i6	tricyclene synthase TPS4, chloroplastic isoform X1 [Medicago truncatula]	TPS4	Tricyclene synthase TPS4, chloroplastic OS=Medicago truncatula GN=TPS4 PE=1 SV=1	GO:0008152(metabolic process);GO:0009570(chloroplast stroma);GO:0009611(response to wounding);GO:0009753(response to jasmonic acid);GO:0010333(terpene synthase activity);GO:0080027(response to herbivore)	ENOG410YF98(synthase)	NA	NA	NA	NA(NA)	A0A072UIS6.1 PF03936.14;Terpene_synth_C;	37.63	1.72	4.5261	up	2.22613e-08	1.17469e-06	yes
TRINITY_DN22613_c0_g1	2991	TRINITY_DN22613_c0_g1_i1	putative C2 domain, phosphoribosyltransferase [Medicago truncatula]	QKY	Protein QUIRKY OS=Arabidopsis thaliana GN=QKY PE=2 SV=1	GO:0005509(calcium ion binding);GO:0005544(calcium-dependent phospholipid binding);GO:0005886(plasma membrane)	ENOG410YF68(C2 domain-containing protein)	K00549	5-methyltetrahydropteroyltriglutamate--homocysteine methyltransferase	EC:2.1.1.14	boe00270(Cysteine and methionine metabolism);boe00450(Selenocompound metabolism)	A0A072UIE1.1 PF00168.28;C2;	6.65	1.1	2.75482	up	2.26398e-08	1.19216e-06	yes
TRINITY_DN15722_c0_g3	1550	TRINITY_DN15722_c0_g3_i1;TRINITY_DN15722_c0_g3_i2	3-hydroxy-3-methylglutaryl-coenzyme A reductase 3-like [Cicer arietinum]	HMG1	3-hydroxy-3-methylglutaryl-coenzyme A reductase 1 OS=Solanum tuberosum GN=HMG1 PE=2 SV=1	GO:0004420(hydroxymethylglutaryl-CoA reductase (NADPH) activity);GO:0005778(peroxisomal membrane);GO:0005789(endoplasmic reticulum membrane);GO:0008299(isoprenoid biosynthetic process);GO:0016126(sterol biosynthetic process)	COG1257()-reductase)	K00021	hydroxymethylglutaryl-CoA reductase (NADPH)	EC:1.1.1.34	cam00900(Terpenoid backbone biosynthesis)	K7MGN5.1 PF00368.16;HMG-CoA_red;	249.77	36.1	2.98035	up	2.26784e-08	1.19216e-06	yes
TRINITY_DN14908_c0_g1	1628	TRINITY_DN14908_c0_g1_i1;TRINITY_DN14908_c0_g1_i2;TRINITY_DN14908_c0_g1_i3;TRINITY_DN14908_c0_g1_i4;TRINITY_DN14908_c0_g1_i5;TRINITY_DN14908_c0_g1_i6	UV-B-induced protein At3g17800, chloroplastic-like [Medicago truncatula]	At3g17800	UV-B-induced protein At3g17800, chloroplastic OS=Arabidopsis thaliana GN=At3g17800 PE=2 SV=1	GO:0003674(molecular_function);GO:0005634(nucleus);GO:0009507(chloroplast);GO:0009611(response to wounding);GO:0010193(response to ozone);GO:0010224(response to UV-B)	ENOG410YDXB(Protein of unknown function (DUF760))	-	-	-	-	I1K5A1.1 PF05542.9;DUF760;	647.23	169.72	2.06281	up	2.28632e-08	1.1996e-06	yes
TRINITY_DN20267_c0_g1	2000	TRINITY_DN20267_c0_g1_i1;TRINITY_DN20267_c0_g1_i2;TRINITY_DN20267_c0_g1_i3;TRINITY_DN20267_c0_g1_i4;TRINITY_DN20267_c0_g1_i5;TRINITY_DN20267_c0_g1_i6	uncharacterized protein LOC25489341 isoform X1 [Medicago truncatula]	-	-	GO:0005886(plasma membrane);GO:0008150(biological_process);GO:0016021(integral component of membrane);GO:0016757(transferase activity, transferring glycosyl groups)	ENOG410YRJG(Core 1 synthase, glycoprotein-N-acetylgalactosamine 3-beta-galactosyltransferase, 1)	K13675	UDP-glucose:O-linked fucose beta-1,3-glucosyltransferase	EC:2.4.1.-	mdm00514(Other types of O-glycan biosynthesis)	A0A072UY59.1 PF04646.10;DUF604;	48.95	17.07	1.90656	up	2.30161e-08	1.20535e-06	yes
TRINITY_DN23532_c0_g1	1447	TRINITY_DN23532_c0_g1_i1;TRINITY_DN23532_c0_g1_i2;TRINITY_DN23532_c0_g1_i3;TRINITY_DN23532_c0_g1_i4;TRINITY_DN23532_c0_g1_i5;TRINITY_DN23532_c0_g1_i6;TRINITY_DN23532_c0_g1_i7	inositol-3-phosphate synthase [Medicago truncatula]	INPS1	Inositol-3-phosphate synthase OS=Nicotiana paniculata GN=INPS1 PE=2 SV=1	GO:0004512(inositol-3-phosphate synthase activity);GO:0005737(cytoplasm);GO:0006021(inositol biosynthetic process);GO:0008654(phospholipid biosynthetic process);GO:0009793(embryo development ending in seed dormancy)	COG1260(synthase)	K01858	myo-inositol-1-phosphate synthase	EC:5.5.1.4	mtr00562(Inositol phosphate metabolism)	I1KT48.1 PF07994.10;NAD_binding_5;	548.41	147.51	2.07952	up	2.30868e-08	1.20574e-06	yes
TRINITY_DN23983_c0_g2	2761	TRINITY_DN23983_c0_g2_i1;TRINITY_DN23983_c0_g2_i2;TRINITY_DN23983_c0_g2_i3;TRINITY_DN23983_c0_g2_i4;TRINITY_DN23983_c0_g2_i5	5-methyltetrahydropteroyltriglutamate--homocysteine methyltransferase 1 [Medicago truncatula]	MS1	5-methyltetrahydropteroyltriglutamate--homocysteine methyltransferase 1 OS=Arabidopsis thaliana GN=MS1 PE=1 SV=1	GO:0003871(5-methyltetrahydropteroyltriglutamate-homocysteine S-methyltransferase activity);GO:0005576(extracellular region);GO:0005829(cytosol);GO:0008705(methionine synthase activity);GO:0050667(homocysteine metabolic process)	COG0620(Catalyzes the transfer of a methyl group from 5- methyltetrahydrofolate to homocysteine resulting in methionine formation (By similarity))	K00549	5-methyltetrahydropteroyltriglutamate--homocysteine methyltransferase	EC:2.1.1.14	mtr00270(Cysteine and methionine metabolism);mtr00450(Selenocompound metabolism)	K7MMH6.1 PF01717.16;Meth_synt_2;	6.49	62.64	-3.06375	down	2.31104e-08	1.20574e-06	yes
TRINITY_DN22924_c0_g2	1063	TRINITY_DN22924_c0_g2_i1	ethylene-responsive transcription factor 2 [Medicago truncatula]	ERF1A	Ethylene-responsive transcription factor 1A OS=Arabidopsis thaliana GN=ERF1A PE=1 SV=2	GO:0003677(DNA binding);GO:0003700(DNA binding transcription factor activity);GO:0005634(nucleus);GO:0005643(nuclear pore);GO:0006351(transcription, DNA-templated);GO:0006355(regulation of transcription, DNA-templated);GO:0006952(defense response);GO:0009873(ethylene-activated signaling pathway);GO:0010087(phloem or xylem histogenesis);GO:0010200(response to chitin);GO:0045893(positive regulation…	ENOG410YJV7(Transcription factor)	NA	NA	NA	NA(NA)	K3ZVR1.1 PF00847.18;AP2;	59.4	16.79	2.00998	up	2.33758e-08	1.2173e-06	yes
TRINITY_DN20806_c0_g1	1707	TRINITY_DN20806_c0_g1_i1;TRINITY_DN20806_c0_g1_i2;TRINITY_DN20806_c0_g1_i3;TRINITY_DN20806_c0_g1_i4;TRINITY_DN20806_c0_g1_i5;TRINITY_DN20806_c0_g1_i6;TRINITY_DN20806_c0_g1_i7;TRINITY_DN20806_c0_g1_i8	UV-B-induced protein At3g17800, chloroplastic [Medicago truncatula]	At3g17800	UV-B-induced protein At3g17800, chloroplastic OS=Arabidopsis thaliana GN=At3g17800 PE=2 SV=1	GO:0008150(biological_process);GO:0008483(transaminase activity);GO:0009507(chloroplast)	ENOG410YC8B(Protein of unknown function (DUF760))	-	-	-	-	G7LF69.1 PF05542.9;DUF760;	10.09	59.11	-2.35804	down	2.35987e-08	1.2266e-06	yes
TRINITY_DN20517_c0_g4	1735	TRINITY_DN20517_c0_g4_i1	putative proline dehydrogenase [Medicago truncatula]	POX1	Proline dehydrogenase 1, mitochondrial OS=Arabidopsis thaliana GN=POX1 PE=2 SV=2	GO:0004657(proline dehydrogenase activity);GO:0005739(mitochondrion);GO:0006537(glutamate biosynthetic process);GO:0006562(proline catabolic process);GO:0006979(response to oxidative stress);GO:0009414(response to water deprivation);GO:0010133(proline catabolic process to glutamate);GO:0042742(defense response to bacterium);GO:0055114(oxidation-reduction process);GO:0071949(FAD binding)	COG0506(Proline dehydrogenase)	K00318	proline dehydrogenase	EC:1.5.-.-	mtr00330(Arginine and proline metabolism)	A0A072UHG7.1 PF01619.16;Pro_dh;	31.69	7.15	2.3044	up	2.49781e-08	1.29587e-06	yes
TRINITY_DN20590_c0_g2	1577	TRINITY_DN20590_c0_g2_i1;TRINITY_DN20590_c0_g2_i2;TRINITY_DN20590_c0_g2_i3;TRINITY_DN20590_c0_g2_i4;TRINITY_DN20590_c0_g2_i5;TRINITY_DN20590_c0_g2_i6	probable aminotransferase TAT2 isoform X1 [Medicago truncatula]	At5g53970	Probable aminotransferase TAT2 OS=Arabidopsis thaliana GN=At5g53970 PE=2 SV=1	GO:0004838(L-tyrosine:2-oxoglutarate aminotransferase activity);GO:0005737(cytoplasm);GO:0005829(cytosol);GO:0006572(tyrosine catabolic process);GO:0008483(transaminase activity);GO:0009058(biosynthetic process);GO:0010189(vitamin E biosynthetic process);GO:0030170(pyridoxal phosphate binding)	COG0436(aminotransferase)	K00815	tyrosine aminotransferase	EC:2.6.1.5	mtr00270(Cysteine and methionine metabolism);mtr00350(Tyrosine metabolism);mtr00360(Phenylalanine metabolism);mtr00400(Phenylalanine, tyrosine and tryptophan biosynthesis);mtr00130(Ubiquinone and other terpenoid-quinone biosynthesis);mtr00950(Isoquinoline alkaloid biosynthesis);mtr00960(Tropane, piperidine and pyridine alkaloid biosynthesis)	G7LDS3.1 PF00155.19;Aminotran_1_2;	46.58	9.47	2.40547	up	2.54967e-08	1.32031e-06	yes
TRINITY_DN13635_c0_g1	581	TRINITY_DN13635_c0_g1_i1;TRINITY_DN13635_c0_g1_i2	calcium-binding protein KIC [Medicago truncatula]	KIC	Calcium-binding protein KIC OS=Arabidopsis thaliana GN=KIC PE=1 SV=2	GO:0005509(calcium ion binding)	COG5126(Calcium-binding protein)	K10840	centrin-2	-	lang03420(Nucleotide excision repair)	G7LAU8.1 PF13833.4;EF-hand_8;	60.74	300.93	-2.08754	down	2.56086e-08	1.32363e-06	yes
TRINITY_DN15036_c0_g1	723	TRINITY_DN15036_c0_g1_i1;TRINITY_DN15036_c0_g1_i10;TRINITY_DN15036_c0_g1_i11;TRINITY_DN15036_c0_g1_i12;TRINITY_DN15036_c0_g1_i13;TRINITY_DN15036_c0_g1_i14;TRINITY_DN15036_c0_g1_i2;TRINITY_DN15036_c0_g1_i3;TRINITY_DN15036_c0_g1_i4;TRINITY_DN15036_c0_g1_i5;TRINITY_DN15036_c0_g1_i6;TRINITY_DN15036_c0_g1_i7;TRINITY_DN15036_c0_g1_i8;TRINITY_DN15036_c0_g1_i9	protein EARLY FLOWERING 4 [Medicago truncatula]	ELF4	Protein EARLY FLOWERING 4 OS=Arabidopsis thaliana GN=ELF4 PE=1 SV=1	GO:0005515(protein binding);GO:0005634(nucleus);GO:0009585(red, far-red light phototransduction);GO:0009648(photoperiodism);GO:0009649(entrainment of circadian clock);GO:0009908(flower development);GO:0009909(regulation of flower development);GO:0010017(red or far-red light signaling pathway);GO:0010114(response to red light);GO:0042753(positive regulation of circadian rhythm);GO:0042803(protein …	ENOG410Y56Z(early flowering)	-	-	-	-	G7JB88.2 PF07011.9;DUF1313;	7.39	71.84	-3.17654	down	2.57989e-08	1.33099e-06	yes
TRINITY_DN16378_c0_g1	250	TRINITY_DN16378_c0_g1_i1	hypothetical protein TorRG33x02_038580 [Trema orientale]	-	-	-	-	-	-	-	-	-	603.12	194.25	1.8526	up	2.65532e-08	1.36737e-06	yes
TRINITY_DN15414_c0_g1	1451	TRINITY_DN15414_c0_g1_i1;TRINITY_DN15414_c0_g1_i2;TRINITY_DN15414_c0_g1_i3;TRINITY_DN15414_c0_g1_i4;TRINITY_DN15414_c0_g1_i5	putative protein kinase RLK-Pelle-LRR-XII-1 family [Medicago truncatula]	At3g47570	Probable LRR receptor-like serine/threonine-protein kinase At3g47570 OS=Arabidopsis thaliana GN=At3g47570 PE=2 SV=1	GO:0004674(protein serine/threonine kinase activity);GO:0005524(ATP binding);GO:0005886(plasma membrane);GO:0006468(protein phosphorylation);GO:0007169(transmembrane receptor protein tyrosine kinase signaling pathway);GO:0009507(chloroplast);GO:0016021(integral component of membrane);GO:0016301(kinase activity)	COG0515(Serine Threonine protein kinase);COG4886(leucine Rich Repeat)	NA	NA	NA	NA(NA)	G7KGZ6.1 PF08263.10;LRRNT_2;	30.35	4.91	2.75125	up	2.67984e-08	1.37744e-06	yes
TRINITY_DN15894_c2_g1	1561	TRINITY_DN15894_c2_g1_i1;TRINITY_DN15894_c2_g1_i2;TRINITY_DN15894_c2_g1_i3	cytochrome P450 81E8-like [Medicago truncatula]	CYP81E8	Cytochrome P450 81E8 OS=Medicago truncatula GN=CYP81E8 PE=2 SV=1	GO:0016020(membrane);GO:0016709(oxidoreductase activity, acting on paired donors, with incorporation or reduction of molecular oxygen, NAD(P)H as one donor, and incorporation of one atom of oxygen);GO:0042343(indole glucosinolate metabolic process);GO:0044550(secondary metabolite biosynthetic process);GO:0098542(defense response to other organism)	COG2124(Cytochrome p450)	K13260	isoflavone/4'-methoxyisoflavone 2'-hydroxylase	EC:1.14.13.89 1.14.13.53	gmx00943(Isoflavonoid biosynthesis)	G7K581.1 PF00067.20;p450;	8.02	0.15	6.13097	up	2.72135e-08	1.39619e-06	yes
TRINITY_DN22080_c0_g1	1582	TRINITY_DN22080_c0_g1_i1	hypothetical protein MtrunA17_Chr2g0312671 [Medicago truncatula]	-	-	-	-	-	-	-	-	-	6.77	0	11.0109	up	2.87246e-08	1.471e-06	yes
TRINITY_DN19341_c0_g1	1732	TRINITY_DN19341_c0_g1_i1;TRINITY_DN19341_c0_g1_i2	UDP-glycosyltransferase 73C5 [Medicago truncatula]	UGT73C5	UDP-glycosyltransferase 73C5 OS=Arabidopsis thaliana GN=UGT73C5 PE=2 SV=1	GO:0009813(flavonoid biosynthetic process);GO:0043231(intracellular membrane-bounded organelle);GO:0052696(flavonoid glucuronidation);GO:0080043(quercetin 3-O-glucosyltransferase activity);GO:0080044(quercetin 7-O-glucosyltransferase activity)	COG1819(Transferase)	NA	NA	NA	NA(NA)	V7CXG3.1 PF00201.16;UDPGT;	67.31	19.95	1.90702	up	2.96674e-08	1.51648e-06	yes
TRINITY_DN23733_c1_g1	2306	TRINITY_DN23733_c1_g1_i1;TRINITY_DN23733_c1_g1_i2;TRINITY_DN23733_c1_g1_i3;TRINITY_DN23733_c1_g1_i4;TRINITY_DN23733_c1_g1_i5;TRINITY_DN23733_c1_g1_i6	protein JINGUBANG [Medicago truncatula]	JGB	Protein JINGUBANG OS=Arabidopsis thaliana GN=JGB PE=1 SV=1	GO:0000166(nucleotide binding);GO:0005634(nucleus);GO:0005834(heterotrimeric G-protein complex);GO:0008150(biological_process)	ENOG410XP1Z(wD repeat domain)	K16794	platelet-activating factor acetylhydrolase IB subunit alpha	-	csv00565(Ether lipid metabolism)	A0A067GVP2.1 PF11715.6;Nup160;	46.83	11.72	2.15068	up	3.01548e-08	1.53856e-06	yes
TRINITY_DN18097_c0_g6	1077	TRINITY_DN18097_c0_g6_i1;TRINITY_DN18097_c0_g6_i2;TRINITY_DN18097_c0_g6_i3	-	-	-	-	-	-	-	-	-	-	0.12	7.5	-6.78937	down	3.03556e-08	1.54596e-06	yes
TRINITY_DN15182_c0_g1	1370	TRINITY_DN15182_c0_g1_i1	scarecrow-like protein 21 [Medicago truncatula]	PAT1	Scarecrow-like transcription factor PAT1 OS=Arabidopsis thaliana GN=PAT1 PE=2 SV=1	GO:0003700(DNA binding transcription factor activity);GO:0005634(nucleus);GO:0006355(regulation of transcription, DNA-templated);GO:0043565(sequence-specific DNA binding)	ENOG4111JS8(chitin-inducible gibberellin-responsive protein)	K14494	DELLA protein	-	tcc04075(Plant hormone signal transduction)	G7K4E0.1 PF03514.12;GRAS;	22.48	3.97	2.65987	up	3.09366e-08	1.57267e-06	yes
TRINITY_DN19637_c0_g3	941	TRINITY_DN19637_c0_g3_i1;TRINITY_DN19637_c0_g3_i2	protein C2-DOMAIN ABA-RELATED 4 [Cajanus cajan]	CAR1	Protein C2-DOMAIN ABA-RELATED 1 OS=Arabidopsis thaliana GN=CAR1 PE=1 SV=1	GO:0005096(GTPase activator activity);GO:0005515(protein binding);GO:0005543(phospholipid binding);GO:0005634(nucleus);GO:0005829(cytosol);GO:0005886(plasma membrane);GO:0006952(defense response);GO:0009651(response to salt stress);GO:0009738(abscisic acid-activated signaling pathway);GO:0009789(positive regulation of abscisic acid-activated signaling pathway);GO:0046872(metal ion binding);GO:190…	COG5038(Domain-Containing protein)	-	-	-	-	G7KPS8.1 PF00168.28;C2;	6.45	0.35	4.42551	up	3.23514e-08	1.64158e-06	yes
TRINITY_DN19320_c0_g5	1512	TRINITY_DN19320_c0_g5_i1;TRINITY_DN19320_c0_g5_i2	probable carboxylesterase 9 [Medicago truncatula]	CXE9	Probable carboxylesterase 9 OS=Arabidopsis thaliana GN=CXE9 PE=2 SV=1	GO:0005634(nucleus);GO:0052689(carboxylic ester hydrolase activity)	COG0657(alpha beta hydrolase fold-3 domain protein)	K14493	gibberellin receptor GID1	EC:3.-.-.-	smo04075(Plant hormone signal transduction)	G7LCQ5.1 PF07859.11;Abhydrolase_3;	13.6	2.22	2.71505	up	3.35138e-08	1.69746e-06	yes
TRINITY_DN25453_c0_g1	2574	TRINITY_DN25453_c0_g1_i1;TRINITY_DN25453_c0_g1_i10;TRINITY_DN25453_c0_g1_i2;TRINITY_DN25453_c0_g1_i3;TRINITY_DN25453_c0_g1_i4;TRINITY_DN25453_c0_g1_i5;TRINITY_DN25453_c0_g1_i6;TRINITY_DN25453_c0_g1_i7;TRINITY_DN25453_c0_g1_i8;TRINITY_DN25453_c0_g1_i9	NADPH--cytochrome P450 reductase [Medicago truncatula]	CPR	NADPH--cytochrome P450 reductase OS=Catharanthus roseus GN=CPR PE=2 SV=1	GO:0030586([methionine synthase] reductase activity)	COG0369(Component of the sulfite reductase complex that catalyzes the 6-electron reduction of sulfite to sulfide. This is one of several activities required for the biosynthesis of L- cysteine from sulfate. The flavoprotein component catalyzes the electron flow from NADPH - FAD - FMN to the hemoprotein component (By similarity))	NA	NA	NA	NA(NA)	A0A0R0FKE1.1 PF00667.18;FAD_binding_1;	305.65	90.67	1.86679	up	3.53841e-08	1.78893e-06	yes
TRINITY_DN12716_c0_g1	710	TRINITY_DN12716_c0_g1_i1	putative transcription factor C2H2 family [Medicago truncatula]	Rnf130	E3 ubiquitin-protein ligase RNF130 OS=Mus musculus GN=Rnf130 PE=2 SV=1	GO:0043161(proteasome-mediated ubiquitin-dependent protein catabolic process);GO:0061630(ubiquitin protein ligase activity)	ENOG41121N2(zinc ion binding)	NA	NA	NA	NA(NA)	V7C5F9.1 PF13639.4;zf-RING_2;	10.48	0.45	4.65759	up	3.62118e-08	1.82582e-06	yes
TRINITY_DN21566_c1_g2	1623	TRINITY_DN21566_c1_g2_i1;TRINITY_DN21566_c1_g2_i2	-	-	-	-	-	-	-	-	-	-	9.31	1.14	3.20046	up	3.62454e-08	1.82582e-06	yes
TRINITY_DN21836_c0_g1	1055	TRINITY_DN21836_c0_g1_i1;TRINITY_DN21836_c0_g1_i2;TRINITY_DN21836_c0_g1_i3;TRINITY_DN21836_c0_g1_i4;TRINITY_DN21836_c0_g1_i5;TRINITY_DN21836_c0_g1_i6	trehalose-phosphate phosphatase A isoform X1 [Medicago truncatula]	TPPA	Trehalose-phosphate phosphatase A OS=Arabidopsis thaliana GN=TPPA PE=1 SV=1	GO:0004805(trehalose-phosphatase activity);GO:0005634(nucleus);GO:0005992(trehalose biosynthetic process)	COG1877(trehalose biosynthetic process)	K01087	trehalose 6-phosphate phosphatase	EC:3.1.3.12	mtr00500(Starch and sucrose metabolism)	A0A072UI42.1 PF02358.14;Trehalose_PPase;	157.03	35.89	2.25866	up	3.68561e-08	1.85322e-06	yes
TRINITY_DN17914_c0_g4	237	TRINITY_DN17914_c0_g4_i1	hypothetical protein CR513_02531, partial [Mucuna pruriens]	-	-	-	ENOG410Y16S(NA)	-	-	-	-	-	543.02	184.59	1.77335	up	3.70264e-08	1.85842e-06	yes
TRINITY_DN16578_c0_g1	935	TRINITY_DN16578_c0_g1_i1;TRINITY_DN16578_c0_g1_i2;TRINITY_DN16578_c0_g1_i3;TRINITY_DN16578_c0_g1_i4;TRINITY_DN16578_c0_g1_i5;TRINITY_DN16578_c0_g1_i6	uncharacterized protein LOC25496852 [Medicago truncatula]	-	-	GO:0003674(molecular_function);GO:0005634(nucleus);GO:0008150(biological_process)	ENOG410XPAX(PRP4 pre-mRNA processing factor 4 homolog B (yeast))	-	-	-	-	-	345.22	100.88	1.94765	up	3.77777e-08	1.89271e-06	yes
TRINITY_DN16329_c1_g7	565	TRINITY_DN16329_c1_g7_i1	RNA-directed DNA polymerase ; HMG-I and HMG-Y, DNA-binding, putative [Medicago truncatula]	-	-	-	ENOG410Z7Z7(Pentatricopeptide repeat-containing protein)	K03231	elongation factor 1-alpha	-	mtr03013(RNA transport)	W9RXZ5.1 PF01193.22;RNA_pol_L;	8.58	0.32	4.83654	up	3.7991e-08	1.89996e-06	yes
TRINITY_DN17916_c0_g1	1390	TRINITY_DN17916_c0_g1_i1;TRINITY_DN17916_c0_g1_i2;TRINITY_DN17916_c0_g1_i3;TRINITY_DN17916_c0_g1_i4	transcription factor TCP13 [Medicago truncatula]	TCP13	Transcription factor TCP13 OS=Arabidopsis thaliana GN=TCP13 PE=1 SV=1	GO:0003677(DNA binding);GO:0003700(DNA binding transcription factor activity);GO:0005515(protein binding);GO:0005634(nucleus);GO:0006351(transcription, DNA-templated);GO:0006355(regulation of transcription, DNA-templated);GO:0009507(chloroplast);GO:0009965(leaf morphogenesis);GO:0010150(leaf senescence);GO:0030154(cell differentiation);GO:0031347(regulation of defense response);GO:0045962(positiv…	ENOG410YQU0(Transcription factor)	-	-	-	-	A0A072U6R0.1 PF03634.11;TCP;	69.24	17.28	2.11355	up	4.27761e-08	2.13542e-06	yes
TRINITY_DN26384_c3_g4	278	TRINITY_DN26384_c3_g4_i1	subtilisin-like protease Glyma18g48580 [Medicago truncatula]	Glyma18g48580	Subtilisin-like protease Glyma18g48580 OS=Glycine max GN=Glyma18g48580 PE=1 SV=3	GO:0004252(serine-type endopeptidase activity);GO:0005618(cell wall)	COG1404(peptidase (S8 and S53, subtilisin, kexin, sedolisin)	-	-	-	-	G7KU92.1 PF05922.14;Inhibitor_I9;	18.55	206.32	-3.18164	down	4.28709e-08	2.13631e-06	yes
TRINITY_DN20290_c0_g3	387	TRINITY_DN20290_c0_g3_i1;TRINITY_DN20290_c0_g3_i2;TRINITY_DN20290_c0_g3_i3	hypothetical protein MTR_7g063540 [Medicago truncatula]	-	-	-	-	-	-	-	-	-	69.59	7	3.52545	up	4.43858e-08	2.20784e-06	yes
TRINITY_DN16752_c0_g5	1603	TRINITY_DN16752_c0_g5_i1	ninja-family protein AFP3 [Medicago truncatula]	AFP-A1	Ninja-family protein 1 OS=Triticum aestivum GN=AFP-A1 PE=3 SV=1	GO:0005515(protein binding);GO:0005634(nucleus);GO:0007165(signal transduction)	ENOG410YWGT(ninja-family protein)	K05747	Wiskott-Aldrich syndrome protein	-	vvi04144(Endocytosis)	A0A072TWS5.1 PF16135.3;Jas;	16.01	3.32	2.45968	up	4.66921e-08	2.3184e-06	yes
TRINITY_DN23323_c0_g1	3183	TRINITY_DN23323_c0_g1_i1;TRINITY_DN23323_c0_g1_i10;TRINITY_DN23323_c0_g1_i11;TRINITY_DN23323_c0_g1_i12;TRINITY_DN23323_c0_g1_i2;TRINITY_DN23323_c0_g1_i3;TRINITY_DN23323_c0_g1_i4;TRINITY_DN23323_c0_g1_i5;TRINITY_DN23323_c0_g1_i6;TRINITY_DN23323_c0_g1_i7;TRINITY_DN23323_c0_g1_i8;TRINITY_DN23323_c0_g1_i9	uncharacterized protein LOC25493857 isoform X1 [Medicago truncatula]	-	-	GO:0003674(molecular_function);GO:0008150(biological_process)	-	-	-	-	-	A0A072UQ83.1 PF05904.9;DUF863;	2.1	10.4	-2.12875	down	4.85726e-08	2.40747e-06	yes
TRINITY_DN15349_c1_g1	404	TRINITY_DN15349_c1_g1_i1;TRINITY_DN15349_c1_g1_i2;TRINITY_DN15349_c1_g1_i3;TRINITY_DN15349_c1_g1_i4;TRINITY_DN15349_c1_g1_i5;TRINITY_DN15349_c1_g1_i6;TRINITY_DN15349_c1_g1_i7;TRINITY_DN15349_c1_g1_i8	-	-	-	-	-	-	-	-	-	-	32.49	2.88	3.68607	up	4.9137e-08	2.4311e-06	yes
TRINITY_DN13526_c0_g1	1799	TRINITY_DN13526_c0_g1_i1;TRINITY_DN13526_c0_g1_i2	protein ALP1-like [Medicago truncatula]	-	-	GO:0005634(nucleus);GO:0005774(vacuolar membrane);GO:0005886(plasma membrane);GO:0009507(chloroplast);GO:0016020(membrane)	ENOG411206Y(transposon protein)	NA	NA	NA	NA(NA)	A0A067KQG6.1 PF13359.4;DDE_Tnp_4;	46.28	11.84	2.1152	up	4.96931e-08	2.45349e-06	yes
TRINITY_DN24297_c0_g1	975	TRINITY_DN24297_c0_g1_i1	basic helix loop helix (BHLH) family transcription factor [Medicago truncatula]	MYC2	Transcription factor MYC2 OS=Arabidopsis thaliana GN=MYC2 PE=1 SV=2	GO:0003677(DNA binding);GO:0003700(DNA binding transcription factor activity);GO:0005515(protein binding);GO:0005634(nucleus);GO:0006351(transcription, DNA-templated);GO:0009269(response to desiccation);GO:0009611(response to wounding);GO:0009737(response to abscisic acid);GO:0009738(abscisic acid-activated signaling pathway);GO:0009753(response to jasmonic acid);GO:0009867(jasmonic acid mediated…	ENOG410YCJJ(anthocyanin-containing compound biosynthetic process)	K13422	transcription factor MYC2	-	mtr04016(MAPK signaling pathway - plant);mtr04075(Plant hormone signal transduction)	G7KF31.1 PF14215.4;bHLH-MYC_N;	42.47	5	3.25779	up	4.97664e-08	2.45349e-06	yes
TRINITY_DN16512_c0_g3	474	TRINITY_DN16512_c0_g3_i1	-	-	-	-	-	-	-	-	-	-	6.7	0.07	6.3294	up	4.99132e-08	2.45637e-06	yes
TRINITY_DN22705_c0_g2	829	TRINITY_DN22705_c0_g2_i1;TRINITY_DN22705_c0_g2_i2;TRINITY_DN22705_c0_g2_i3	universal stress protein PHOS32 [Medicago truncatula]	-	-	GO:0003676(nucleic acid binding);GO:0005634(nucleus);GO:0005737(cytoplasm);GO:0005886(plasma membrane);GO:0006950(response to stress);GO:0006979(response to oxidative stress);GO:0009408(response to heat);GO:0009409(response to cold);GO:0009506(plasmodesma);GO:0016787(hydrolase activity);GO:0034337(RNA folding);GO:0061077(chaperone-mediated protein folding)	ENOG410YI8C(universal stress protein)	-	-	-	-	B7FGP5.1 PF00582.24;Usp;	11.24	51.32	-1.99891	down	5.1729e-08	2.54122e-06	yes
TRINITY_DN18135_c1_g1	1644	TRINITY_DN18135_c1_g1_i1;TRINITY_DN18135_c1_g1_i2;TRINITY_DN18135_c1_g1_i3;TRINITY_DN18135_c1_g1_i4;TRINITY_DN18135_c1_g1_i5	probable sugar phosphate/phosphate translocator At3g11320 [Medicago truncatula]	At3g11320	Probable sugar phosphate/phosphate translocator At3g11320 OS=Arabidopsis thaliana GN=At3g11320 PE=2 SV=1	GO:0005783(endoplasmic reticulum);GO:0005794(Golgi apparatus);GO:0005886(plasma membrane);GO:0008514(organic anion transmembrane transporter activity);GO:0008643(carbohydrate transport);GO:0016021(integral component of membrane)	ENOG410XP1S(solute carrier family 35 member)	NA	NA	NA	NA(NA)	G7KBV5.2 PF03151.14;TPT;	28.05	7.98	1.99795	up	5.1855e-08	2.54291e-06	yes
TRINITY_DN16019_c0_g1	1224	TRINITY_DN16019_c0_g1_i1;TRINITY_DN16019_c0_g1_i2;TRINITY_DN16019_c0_g1_i3;TRINITY_DN16019_c0_g1_i4;TRINITY_DN16019_c0_g1_i5;TRINITY_DN16019_c0_g1_i6;TRINITY_DN16019_c0_g1_i7	uncharacterized protein PAM68-like [Medicago truncatula]	At5g52780	Uncharacterized protein PAM68-like OS=Arabidopsis thaliana GN=At5g52780 PE=2 SV=1	GO:0003674(molecular_function);GO:0008150(biological_process);GO:0009507(chloroplast);GO:0009535(chloroplast thylakoid membrane);GO:0016021(integral component of membrane)	ENOG410YU1H(Protein of unknown function (DUF3464))	-	-	-	-	A0A072UKD7.1 PF11947.6;DUF3464;	22.14	93.93	-1.92836	down	5.22876e-08	2.5596e-06	yes
TRINITY_DN14603_c0_g1	2517	TRINITY_DN14603_c0_g1_i1	LOW QUALITY PROTEIN: serine/threonine-protein kinase-like protein CCR4 [Medicago truncatula]	CCR4	Serine/threonine-protein kinase-like protein CCR4 OS=Arabidopsis thaliana GN=CCR4 PE=1 SV=1	GO:0004672(protein kinase activity);GO:0004674(protein serine/threonine kinase activity);GO:0005524(ATP binding);GO:0005886(plasma membrane);GO:0006468(protein phosphorylation);GO:0009755(hormone-mediated signaling pathway);GO:0016021(integral component of membrane);GO:0016301(kinase activity);GO:0042803(protein homodimerization activity)	COG0515(Serine Threonine protein kinase)	NA	NA	NA	NA(NA)	G7JRB2.1 PF00069.23;Pkinase;	35.08	4.77	3.06286	up	5.31642e-08	2.59793e-06	yes
TRINITY_DN14203_c0_g1	969	TRINITY_DN14203_c0_g1_i1;TRINITY_DN14203_c0_g1_i2;TRINITY_DN14203_c0_g1_i3	probable aquaporin NIP-type [Medicago truncatula]	-	Probable aquaporin NIP-type OS=Nicotiana alata PE=2 SV=1	GO:0005887(integral component of plasma membrane);GO:0009992(cellular water homeostasis);GO:0015250(water channel activity);GO:0015254(glycerol channel activity);GO:0034220(ion transmembrane transport)	COG0580(Channel that permits osmotically driven movement of water in both directions. It is involved in the osmoregulation and in the maintenance of cell turgor during volume expansion in rapidly growing cells. It mediates rapid entry or exit of water in response to abrupt changes in osmolarity (By similarity))	NA	NA	NA	NA(NA)	G7IYK0.1 PF00230.18;MIP;	1.49	31.75	-4.25071	down	5.36944e-08	2.61923e-06	yes
TRINITY_DN14566_c0_g2	1517	TRINITY_DN14566_c0_g2_i1;TRINITY_DN14566_c0_g2_i2	-	-	-	-	-	-	-	-	-	-	12.22	2.5	2.48491	up	5.4439e-08	2.65089e-06	yes
TRINITY_DN23750_c0_g3	3102	TRINITY_DN23750_c0_g3_i1;TRINITY_DN23750_c0_g3_i2;TRINITY_DN23750_c0_g3_i3;TRINITY_DN23750_c0_g3_i4;TRINITY_DN23750_c0_g3_i5;TRINITY_DN23750_c0_g3_i6	pullulanase 1, chloroplastic [Medicago truncatula]	PU1	Pullulanase 1, chloroplastic OS=Arabidopsis thaliana GN=PU1 PE=1 SV=2	GO:0004556(alpha-amylase activity);GO:0005886(plasma membrane);GO:0005975(carbohydrate metabolic process);GO:0005983(starch catabolic process);GO:0009507(chloroplast);GO:0009570(chloroplast stroma);GO:0010303(limit dextrinase activity);GO:0019252(starch biosynthetic process);GO:0051060(pullulanase activity)	COG1523(Glycogen debranching enzyme)	K01214	isoamylase	EC:3.2.1.68	dct00500(Starch and sucrose metabolism)	A0A072VMS0.1 PF11852.6;DUF3372;	1.23	11.28	-2.94247	down	5.51472e-08	2.68067e-06	yes
TRINITY_DN19024_c0_g1	1227	TRINITY_DN19024_c0_g1_i1;TRINITY_DN19024_c0_g1_i2;TRINITY_DN19024_c0_g1_i3;TRINITY_DN19024_c0_g1_i4;TRINITY_DN19024_c0_g1_i5;TRINITY_DN19024_c0_g1_i6	-	-	-	-	-	-	-	-	-	-	77.45	9.7	3.2896	up	5.55216e-08	2.69416e-06	yes
TRINITY_DN25741_c0_g1	678	TRINITY_DN25741_c0_g1_i1	probable disease resistance protein At5g66900 [Medicago truncatula]	-	-	-	COG4886(leucine Rich Repeat)	-	-	-	-	-	18.47	1.37	3.93329	up	5.56726e-08	2.69663e-06	yes
TRINITY_DN20789_c0_g3	983	TRINITY_DN20789_c0_g3_i1;TRINITY_DN20789_c0_g3_i2;TRINITY_DN20789_c0_g3_i3;TRINITY_DN20789_c0_g3_i4;TRINITY_DN20789_c0_g3_i5	probable WRKY transcription factor 65 [Medicago truncatula]	WRKY69	Probable WRKY transcription factor 69 OS=Arabidopsis thaliana GN=WRKY69 PE=2 SV=1	GO:0003700(DNA binding transcription factor activity);GO:0005634(nucleus);GO:0006351(transcription, DNA-templated);GO:0006355(regulation of transcription, DNA-templated);GO:0043565(sequence-specific DNA binding)	ENOG410YK4F(WRKY transcription factor)	K13426	WRKY transcription factor 29	-	aip04016(MAPK signaling pathway - plant);aip04626(Plant-pathogen interaction)	A0A072V5L0.1 PF03106.13;WRKY;	6.53	40.5	-2.24866	down	5.57669e-08	2.69663e-06	yes
TRINITY_DN24128_c0_g1	2078	TRINITY_DN24128_c0_g1_i1;TRINITY_DN24128_c0_g1_i2;TRINITY_DN24128_c0_g1_i3;TRINITY_DN24128_c0_g1_i4;TRINITY_DN24128_c0_g1_i5;TRINITY_DN24128_c0_g1_i6;TRINITY_DN24128_c0_g1_i7	1-aminocyclopropane-1-carboxylate synthase [Medicago truncatula]	ACS1	1-aminocyclopropane-1-carboxylate synthase OS=Glycine max GN=ACS1 PE=2 SV=1	GO:0005515(protein binding);GO:0005737(cytoplasm);GO:0006952(defense response);GO:0006979(response to oxidative stress);GO:0009611(response to wounding);GO:0009612(response to mechanical stimulus);GO:0009693(ethylene biosynthetic process);GO:0009723(response to ethylene);GO:0009733(response to auxin);GO:0009753(response to jasmonic acid);GO:0009835(fruit ripening);GO:0010087(phloem or xylem histo…	COG0436(aminotransferase)	K20772	1-aminocyclopropane-1-carboxylate synthase 1/2/6	EC:4.4.1.14	mtr00270(Cysteine and methionine metabolism);mtr04016(MAPK signaling pathway - plant)	A0A072TUM5.1 PF00155.19;Aminotran_1_2;	27.61	14.71	1.96988	up	5.59506e-08	2.70081e-06	yes
TRINITY_DN23629_c2_g1	767	TRINITY_DN23629_c2_g1_i1;TRINITY_DN23629_c2_g1_i2;TRINITY_DN23629_c2_g1_i3;TRINITY_DN23629_c2_g1_i4;TRINITY_DN23629_c2_g1_i5;TRINITY_DN23629_c2_g1_i6;TRINITY_DN23629_c2_g1_i7;TRINITY_DN23629_c2_g1_i8;TRINITY_DN23629_c2_g1_i9	seed maturation protein PM36, partial [Trifolium pratense]	TENA_E	Probable bifunctional TENA-E protein OS=Glycine max GN=TENA_E PE=2 SV=1	GO:0005575(cellular_component);GO:0009228(thiamine biosynthetic process);GO:0009229(thiamine diphosphate biosynthetic process);GO:0050334(thiaminase activity)	COG0819(Transcriptional activator, tena)	K20896	formylaminopyrimidine deformylase / aminopyrimidine aminohydrolase	EC:3.5.1.- 3.5.99.-	mtr00730(Thiamine metabolism)	G7JMU3.1 PF03070.14;TENA_THI-4;	106.43	35.14	1.82349	up	5.6481e-08	2.72168e-06	yes
TRINITY_DN20214_c0_g2	270	TRINITY_DN20214_c0_g2_i1;TRINITY_DN20214_c0_g2_i2;TRINITY_DN20214_c0_g2_i3;TRINITY_DN20214_c0_g2_i4;TRINITY_DN20214_c0_g2_i5	-	-	-	-	-	-	-	-	-	-	28.81	0.96	5.21863	up	5.97134e-08	2.8713e-06	yes
TRINITY_DN20982_c0_g1	1228	TRINITY_DN20982_c0_g1_i1;TRINITY_DN20982_c0_g1_i10;TRINITY_DN20982_c0_g1_i2;TRINITY_DN20982_c0_g1_i3;TRINITY_DN20982_c0_g1_i4;TRINITY_DN20982_c0_g1_i5;TRINITY_DN20982_c0_g1_i6;TRINITY_DN20982_c0_g1_i7;TRINITY_DN20982_c0_g1_i8;TRINITY_DN20982_c0_g1_i9	uncharacterized protein At4g00950 [Medicago truncatula]	-	-	GO:0003674(molecular_function);GO:0005634(nucleus);GO:0008150(biological_process)	ENOG4111CMH(NA)	-	-	-	-	I1KAT6.1 PF05097.10;DUF688;	96.18	27.67	1.92613	up	5.97928e-08	2.8713e-06	yes
TRINITY_DN20207_c2_g1	465	TRINITY_DN20207_c2_g1_i1;TRINITY_DN20207_c2_g1_i2	-	-	-	-	-	-	-	-	-	-	50.93	0.95	5.38069	up	6.03795e-08	2.89446e-06	yes
TRINITY_DN20170_c0_g1	1102	TRINITY_DN20170_c0_g1_i1	-	-	-	-	-	-	-	-	-	-	7.69	0.53	3.98397	up	6.27087e-08	3.00094e-06	yes
TRINITY_DN25412_c0_g3	1055	TRINITY_DN25412_c0_g3_i1;TRINITY_DN25412_c0_g3_i2	uncharacterized acetyltransferase At3g50280-like [Cicer arietinum]	At3g50280	Uncharacterized acetyltransferase At3g50280 OS=Arabidopsis thaliana GN=At3g50280 PE=3 SV=1	GO:0005737(cytoplasm);GO:0016740(transferase activity);GO:0016747(transferase activity, transferring acyl groups other than amino-acyl groups)	ENOG410YEZS(Transferase Family)	NA	NA	NA	NA(NA)	A0A072UQ28.1 PF02458.13;Transferase;	404.33	80.84	2.52937	up	6.48359e-08	3.09385e-06	yes
TRINITY_DN19916_c2_g1	544	TRINITY_DN19916_c2_g1_i1	hypothetical protein MTR_4g046147 [Medicago truncatula]	-	-	-	ENOG4111CKW(NA)	-	-	-	-	-	74.38	11.37	2.87663	up	6.48733e-08	3.09385e-06	yes
TRINITY_DN24187_c1_g2	766	TRINITY_DN24187_c1_g2_i1	light-regulated protein 1, chloroplastic [Medicago truncatula]	-	-	-	-	-	-	-	-	B7FGR7.1 PF07207.9;Lir1;	15.09	139.4	-3.02075	down	6.52334e-08	3.10569e-06	yes
TRINITY_DN22778_c0_g1	1651	TRINITY_DN22778_c0_g1_i1;TRINITY_DN22778_c0_g1_i2;TRINITY_DN22778_c0_g1_i3;TRINITY_DN22778_c0_g1_i4	ABSCISIC ACID-INSENSITIVE 5-like protein 7 [Medicago truncatula]	ABF4	ABSCISIC ACID-INSENSITIVE 5-like protein 7 OS=Arabidopsis thaliana GN=ABF4 PE=1 SV=1	GO:0000976(transcription regulatory region sequence-specific DNA binding);GO:0000977(RNA polymerase II regulatory region sequence-specific DNA binding);GO:0003677(DNA binding);GO:0003700(DNA binding transcription factor activity);GO:0005515(protein binding);GO:0005634(nucleus);GO:0006351(transcription, DNA-templated);GO:0006355(regulation of transcription, DNA-templated);GO:0009414(response to wa…	ENOG410YB2M(Transcription factor)	K14432	ABA responsive element binding factor	-	mtr04075(Plant hormone signal transduction)	G7JL68.1 PF00170.19;bZIP_1;	9.42	36.47	-1.79	down	6.83292e-08	3.24751e-06	yes
TRINITY_DN15509_c1_g6	501	TRINITY_DN15509_c1_g6_i1;TRINITY_DN15509_c1_g6_i2;TRINITY_DN15509_c1_g6_i3;TRINITY_DN15509_c1_g6_i4;TRINITY_DN15509_c1_g6_i5	-	-	-	-	-	-	-	-	-	-	10.04	0	8.92171	up	7.08952e-08	3.3637e-06	yes
TRINITY_DN13848_c0_g5	1225	TRINITY_DN13848_c0_g5_i1	receptor-like protein kinase, partial [Trifolium pratense]	INRPK1	Receptor-like protein kinase OS=Ipomoea nil GN=INRPK1 PE=2 SV=2	GO:0005576(extracellular region);GO:0005886(plasma membrane);GO:0006468(protein phosphorylation);GO:0019199(transmembrane receptor protein kinase activity)	COG0515(Serine Threonine protein kinase);COG4886(leucine Rich Repeat)	NA	NA	NA	NA(NA)	G7KHF5.2 PF00069.23;Pkinase;	0	2.94	-9.20898	down	7.3212e-08	3.4677e-06	yes
TRINITY_DN17266_c0_g2	1760	TRINITY_DN17266_c0_g2_i1	probable receptor-like protein kinase At5g20050 [Medicago truncatula]	At5g20050	Probable receptor-like protein kinase At5g20050 OS=Arabidopsis thaliana GN=At5g20050 PE=2 SV=1	GO:0004674(protein serine/threonine kinase activity);GO:0005886(plasma membrane);GO:0006468(protein phosphorylation)	COG0515(Serine Threonine protein kinase)	NA	NA	NA	NA(NA)	G7JV96.1 PF00069.23;Pkinase;	16.98	3.18	2.58761	up	7.45415e-08	3.52466e-06	yes
TRINITY_DN13459_c0_g1	408	TRINITY_DN13459_c0_g1_i1;TRINITY_DN13459_c0_g1_i2	transmembrane protein, putative [Medicago truncatula]	-	-	-	-	-	-	-	-	-	8.75	97.83	-3.29108	down	7.52269e-08	3.55037e-06	yes
TRINITY_DN21239_c0_g1	3008	TRINITY_DN21239_c0_g1_i1;TRINITY_DN21239_c0_g1_i10;TRINITY_DN21239_c0_g1_i11;TRINITY_DN21239_c0_g1_i12;TRINITY_DN21239_c0_g1_i2;TRINITY_DN21239_c0_g1_i3;TRINITY_DN21239_c0_g1_i4;TRINITY_DN21239_c0_g1_i5;TRINITY_DN21239_c0_g1_i6;TRINITY_DN21239_c0_g1_i7;TRINITY_DN21239_c0_g1_i8;TRINITY_DN21239_c0_g1_i9	hydroxymethylglutaryl-CoA lyase [Medicago truncatula]	HMGCL	Hydroxymethylglutaryl-CoA lyase, mitochondrial OS=Arabidopsis thaliana GN=HMGCL PE=1 SV=2	GO:0004419(hydroxymethylglutaryl-CoA lyase activity);GO:0005739(mitochondrion);GO:0005759(mitochondrial matrix);GO:0006551(leucine metabolic process);GO:0006552(leucine catabolic process);GO:0046951(ketone body biosynthetic process)	COG0119(Catalyzes the condensation of the acetyl group of acetyl-CoA with 3-methyl-2-oxobutanoate (2-oxoisovalerate) to form 3-carboxy-3-hydroxy-4-methylpentanoate (2-isopropylmalate) (By similarity))	K01640	hydroxymethylglutaryl-CoA lyase	EC:4.1.3.4	mtr00650(Butanoate metabolism);mtr00072(Synthesis and degradation of ketone bodies);mtr00280(Valine, leucine and isoleucine degradation);mtr04146(Peroxisome)	V7BNL0.1 PF00682.17;HMGL-like;	632.22	127.05	2.32857	up	7.5341e-08	3.55037e-06	yes
TRINITY_DN13651_c0_g3	943	TRINITY_DN13651_c0_g3_i1;TRINITY_DN13651_c0_g3_i2	calmodulin-like protein 7 [Medicago truncatula]	CML3	Calmodulin-like protein 3 OS=Arabidopsis thaliana GN=CML3 PE=2 SV=1	GO:0005509(calcium ion binding)	COG5126(Calcium-binding protein)	K13448	calcium-binding protein CML	-	mtr04626(Plant-pathogen interaction)	G7IHU6.1 PF13499.4;EF-hand_7;	101.19	25.68	2.18622	up	7.61685e-08	3.58328e-06	yes
TRINITY_DN20863_c1_g1	1976	TRINITY_DN20863_c1_g1_i1;TRINITY_DN20863_c1_g1_i10;TRINITY_DN20863_c1_g1_i11;TRINITY_DN20863_c1_g1_i12;TRINITY_DN20863_c1_g1_i13;TRINITY_DN20863_c1_g1_i14;TRINITY_DN20863_c1_g1_i15;TRINITY_DN20863_c1_g1_i16;TRINITY_DN20863_c1_g1_i2;TRINITY_DN20863_c1_g1_i3;TRINITY_DN20863_c1_g1_i4;TRINITY_DN20863_c1_g1_i5;TRINITY_DN20863_c1_g1_i6;TRINITY_DN20863_c1_g1_i7;TRINITY_DN20863_c1_g1_i8;TRINITY_DN20863_c…	bZIP transcription factor 46 [Medicago truncatula]	ABF2	ABSCISIC ACID-INSENSITIVE 5-like protein 5 OS=Arabidopsis thaliana GN=ABF2 PE=1 SV=1	GO:0000976(transcription regulatory region sequence-specific DNA binding);GO:0000977(RNA polymerase II regulatory region sequence-specific DNA binding);GO:0003677(DNA binding);GO:0003700(DNA binding transcription factor activity);GO:0005515(protein binding);GO:0005634(nucleus);GO:0006351(transcription, DNA-templated);GO:0006355(regulation of transcription, DNA-templated);GO:0009414(response to wa…	ENOG410YB2M(Transcription factor)	K14432	ABA responsive element binding factor	-	mtr04075(Plant hormone signal transduction)	M0SVZ8.1 PF00170.19;bZIP_1;	69.94	21.51	1.94835	up	7.66494e-08	3.5998e-06	yes
TRINITY_DN22996_c1_g1	1395	TRINITY_DN22996_c1_g1_i1;TRINITY_DN22996_c1_g1_i10;TRINITY_DN22996_c1_g1_i11;TRINITY_DN22996_c1_g1_i12;TRINITY_DN22996_c1_g1_i13;TRINITY_DN22996_c1_g1_i14;TRINITY_DN22996_c1_g1_i15;TRINITY_DN22996_c1_g1_i16;TRINITY_DN22996_c1_g1_i17;TRINITY_DN22996_c1_g1_i18;TRINITY_DN22996_c1_g1_i19;TRINITY_DN22996_c1_g1_i2;TRINITY_DN22996_c1_g1_i20;TRINITY_DN22996_c1_g1_i3;TRINITY_DN22996_c1_g1_i4;TRINITY_DN229…	serine carboxypeptidase-like 45 [Medicago truncatula]	SCPL45	Serine carboxypeptidase-like 45 OS=Arabidopsis thaliana GN=SCPL45 PE=2 SV=1	GO:0004185(serine-type carboxypeptidase activity);GO:0016747(transferase activity, transferring acyl groups other than amino-acyl groups);GO:0019748(secondary metabolic process);GO:0051603(proteolysis involved in cellular protein catabolic process)	COG2939(carboxy-peptidase)	NA	NA	NA	NA(NA)	A0A072UTV7.1 PF00450.20;Peptidase_S10;	18.47	73.73	-1.73999	down	7.76688e-08	3.64063e-06	yes
TRINITY_DN25005_c1_g7	736	TRINITY_DN25005_c1_g7_i1	NAC domain-containing protein 62 [Medicago truncatula]	NAC014	NAC domain-containing protein 14 OS=Arabidopsis thaliana GN=NAC014 PE=2 SV=1	GO:0003677(DNA binding);GO:0003700(DNA binding transcription factor activity);GO:0005634(nucleus);GO:0006351(transcription, DNA-templated);GO:0006355(regulation of transcription, DNA-templated);GO:0007275(multicellular organism development);GO:0016021(integral component of membrane)	ENOG410ZJIT(nac domain)	-	-	-	-	G7J930.1 PF02365.13;NAM;	49.53	12.14	2.22587	up	7.77811e-08	3.64063e-06	yes
TRINITY_DN16444_c0_g4	557	TRINITY_DN16444_c0_g4_i1;TRINITY_DN16444_c0_g4_i2	unknown [Medicago truncatula]	UGT73C3	UDP-glycosyltransferase 73C3 OS=Arabidopsis thaliana GN=UGT73C3 PE=2 SV=1	GO:0009813(flavonoid biosynthetic process);GO:0043231(intracellular membrane-bounded organelle);GO:0052696(flavonoid glucuronidation);GO:0080043(quercetin 3-O-glucosyltransferase activity);GO:0080044(quercetin 7-O-glucosyltransferase activity)	COG1819(Transferase)	NA	NA	NA	NA(NA)	G7L4W5.1 PF00201.16;UDPGT;	267.46	51.07	2.59251	up	8.94355e-08	4.17908e-06	yes
TRINITY_DN21072_c0_g1	940	TRINITY_DN21072_c0_g1_i1;TRINITY_DN21072_c0_g1_i10;TRINITY_DN21072_c0_g1_i11;TRINITY_DN21072_c0_g1_i2;TRINITY_DN21072_c0_g1_i3;TRINITY_DN21072_c0_g1_i4;TRINITY_DN21072_c0_g1_i5;TRINITY_DN21072_c0_g1_i6;TRINITY_DN21072_c0_g1_i7;TRINITY_DN21072_c0_g1_i8;TRINITY_DN21072_c0_g1_i9	hypothetical protein MTR_1g052720 [Medicago truncatula]	-	-	-	-	NA	NA	NA	NA(NA)	-	49.57	6.12	3.00525	up	9.00183e-08	4.19924e-06	yes
TRINITY_DN19331_c0_g1	527	TRINITY_DN19331_c0_g1_i1;TRINITY_DN19331_c0_g1_i2;TRINITY_DN19331_c0_g1_i3	hypothetical protein TSUD_289410 [Trifolium subterraneum]	-	-	-	-	-	-	-	-	-	2.99	53.32	-3.94975	down	9.04467e-08	4.21215e-06	yes
TRINITY_DN23901_c0_g2	1077	TRINITY_DN23901_c0_g2_i1;TRINITY_DN23901_c0_g2_i2	BTB/POZ domain-containing protein At3g56230 isoform X1 [Medicago truncatula]	At3g56230	BTB/POZ domain-containing protein At3g56230 OS=Arabidopsis thaliana GN=At3g56230 PE=2 SV=1	GO:0005634(nucleus);GO:0043161(proteasome-mediated ubiquitin-dependent protein catabolic process)	ENOG410XQV8(meprin and TRAF homology domain-containing protein MATH domain-containing protein)	NA	NA	NA	NA(NA)	G7J2Y3.1 PF00651.29;BTB;	1.62	16.6	-3.11007	down	9.15568e-08	4.2567e-06	yes
TRINITY_DN14474_c2_g6	2180	TRINITY_DN14474_c2_g6_i1;TRINITY_DN14474_c2_g6_i2	cytochrome P450 86B1 [Medicago truncatula]	CYP86B1	Cytochrome P450 86B1 OS=Arabidopsis thaliana GN=CYP86B1 PE=2 SV=1	GO:0004497(monooxygenase activity);GO:0005506(iron ion binding);GO:0005783(endoplasmic reticulum);GO:0005789(endoplasmic reticulum membrane);GO:0009507(chloroplast);GO:0010345(suberin biosynthetic process);GO:0016021(integral component of membrane);GO:0016705(oxidoreductase activity, acting on paired donors, with incorporation or reduction of molecular oxygen);GO:0019825(oxygen binding);GO:002003…	COG2124(Cytochrome p450)	K15402	fatty acid omega-hydroxylase	EC:1.14.-.-	mtr00073(Cutin, suberine and wax biosynthesis)	G7JPI5.1 PF00067.20;p450;	0.85	8.9	-3.18372	down	9.26401e-08	4.29986e-06	yes
TRINITY_DN16836_c0_g1	873	TRINITY_DN16836_c0_g1_i1;TRINITY_DN16836_c0_g1_i2;TRINITY_DN16836_c0_g1_i3;TRINITY_DN16836_c0_g1_i4;TRINITY_DN16836_c0_g1_i5;TRINITY_DN16836_c0_g1_i6	wound-induced-like protein [Medicago truncatula]	WUN1	Wound-induced protein 1 OS=Solanum tuberosum GN=WUN1 PE=2 SV=1	GO:0002238(response to molecule of fungal origin);GO:0003674(molecular_function);GO:0007568(aging);GO:0009620(response to fungus);GO:0009624(response to nematode);GO:0010150(leaf senescence);GO:0010193(response to ozone)	ENOG410ZU39(Protein of unknown function (DUF2985))	-	-	-	-	G7J2F7.1 PF07107.9;WI12;	746.74	192.05	2.13786	up	9.29105e-08	4.30522e-06	yes
TRINITY_DN25851_c0_g1	2581	TRINITY_DN25851_c0_g1_i1;TRINITY_DN25851_c0_g1_i10;TRINITY_DN25851_c0_g1_i11;TRINITY_DN25851_c0_g1_i12;TRINITY_DN25851_c0_g1_i13;TRINITY_DN25851_c0_g1_i14;TRINITY_DN25851_c0_g1_i15;TRINITY_DN25851_c0_g1_i16;TRINITY_DN25851_c0_g1_i17;TRINITY_DN25851_c0_g1_i18;TRINITY_DN25851_c0_g1_i19;TRINITY_DN25851_c0_g1_i2;TRINITY_DN25851_c0_g1_i20;TRINITY_DN25851_c0_g1_i21;TRINITY_DN25851_c0_g1_i22;TRINITY_DN2…	protein DETOXIFICATION 42 isoform X1 [Medicago truncatula]	DTX42	Protein DETOXIFICATION 42 OS=Arabidopsis thaliana GN=DTX42 PE=2 SV=2	GO:0006855(drug transmembrane transport)	COG0534(Mate efflux family protein)	NA	NA	NA	NA(NA)	G7IRZ8.1 PF01554.16;MatE;	39.81	11.21	1.94377	up	1.00096e-07	4.63043e-06	yes
TRINITY_DN16017_c0_g1	601	TRINITY_DN16017_c0_g1_i1;TRINITY_DN16017_c0_g1_i2;TRINITY_DN16017_c0_g1_i3;TRINITY_DN16017_c0_g1_i4;TRINITY_DN16017_c0_g1_i5;TRINITY_DN16017_c0_g1_i6;TRINITY_DN16017_c0_g1_i7;TRINITY_DN16017_c0_g1_i8	-	-	-	-	-	-	-	-	-	-	2.07	35.27	-3.94867	down	1.01123e-07	4.67016e-06	yes
TRINITY_DN15616_c0_g4	983	TRINITY_DN15616_c0_g4_i1;TRINITY_DN15616_c0_g4_i2	uncharacterized protein LOC11418700 [Medicago truncatula]	-	-	-	ENOG4111RQ5(expressed protein)	-	-	-	-	I1M5T8.1 PF14559.4;TPR_19;	68.02	14.09	2.49016	up	1.03521e-07	4.77297e-06	yes
TRINITY_DN14179_c0_g2	432	TRINITY_DN14179_c0_g2_i1	-	-	-	-	-	-	-	-	-	-	83.86	14.05	2.78368	up	1.05492e-07	4.85578e-06	yes
TRINITY_DN22757_c0_g6	962	TRINITY_DN22757_c0_g6_i1;TRINITY_DN22757_c0_g6_i2	1-aminocyclopropane-1-carboxylate oxidase homolog 1 [Medicago truncatula]	At1g06620	1-aminocyclopropane-1-carboxylate oxidase homolog 1 OS=Arabidopsis thaliana GN=At1g06620 PE=2 SV=1	GO:0051213(dioxygenase activity)	COG3491(2OGFe(II) oxygenase)	K13525	transitional endoplasmic reticulum ATPase	-	gmx04141(Protein processing in endoplasmic reticulum)	G7I469.1 PF14226.4;DIOX_N;	13.92	1.35	3.50498	up	1.06712e-07	4.9038e-06	yes
TRINITY_DN19020_c0_g2	1502	TRINITY_DN19020_c0_g2_i1;TRINITY_DN19020_c0_g2_i2;TRINITY_DN19020_c0_g2_i3;TRINITY_DN19020_c0_g2_i4;TRINITY_DN19020_c0_g2_i5	sarcoplasmic reticulum histidine-rich calcium-binding protein [Medicago truncatula]	-	-	-	ENOG410YYWX(NA)	-	-	-	-	-	116.72	31.55	2.12153	up	1.07947e-07	4.95236e-06	yes
TRINITY_DN20477_c0_g4	1594	TRINITY_DN20477_c0_g4_i1;TRINITY_DN20477_c0_g4_i2	glucan endo-1,3-beta-glucosidase isoform X2 [Medicago truncatula]	GLC1	Glucan endo-1,3-beta-glucosidase OS=Triticum aestivum GN=GLC1 PE=2 SV=1	GO:0004553(hydrolase activity, hydrolyzing O-glycosyl compounds);GO:0030247(polysaccharide binding);GO:0046658(anchored component of plasma membrane)	ENOG410YCVQ(glucan endo-1-3-beta-glucosidase)	K19891	glucan endo-1,3-beta-glucosidase 1/2/3	EC:3.2.1.39	sly00500(Starch and sucrose metabolism)	G7L028.1 PF00332.16;Glyco_hydro_17;	25.63	7.18	2.03814	up	1.08965e-07	4.99079e-06	yes
TRINITY_DN15477_c0_g1	919	TRINITY_DN15477_c0_g1_i1;TRINITY_DN15477_c0_g1_i2;TRINITY_DN15477_c0_g1_i3;TRINITY_DN15477_c0_g1_i4;TRINITY_DN15477_c0_g1_i5;TRINITY_DN15477_c0_g1_i6;TRINITY_DN15477_c0_g1_i7;TRINITY_DN15477_c0_g1_i8;TRINITY_DN15477_c0_g1_i9	indole-3-acetic acid-induced protein ARG2 [Medicago truncatula]	ARG2	Indole-3-acetic acid-induced protein ARG2 OS=Vigna radiata var. radiata GN=ARG2 PE=2 SV=1	GO:0000302(response to reactive oxygen species);GO:0003674(molecular_function);GO:0005739(mitochondrion);GO:0006950(response to stress);GO:0006952(defense response);GO:0006979(response to oxidative stress);GO:0009409(response to cold);GO:0009414(response to water deprivation);GO:0009416(response to light stimulus);GO:0009507(chloroplast);GO:0009625(response to insect);GO:0009646(response to absen…	ENOG410ZEWF(late embryogenesis abundant protein)	-	-	-	-	I3S6P4.1 PF03242.11;LEA_3;	332.98	102.15	1.86749	up	1.15498e-07	5.28132e-06	yes
TRINITY_DN26054_c0_g1	2921	TRINITY_DN26054_c0_g1_i1;TRINITY_DN26054_c0_g1_i2;TRINITY_DN26054_c0_g1_i3;TRINITY_DN26054_c0_g1_i4;TRINITY_DN26054_c0_g1_i5	probable leucine-rich repeat receptor-like protein kinase At5g63930 isoform X1 [Medicago truncatula]	TDR	Leucine-rich repeat receptor-like protein kinase TDR OS=Arabidopsis thaliana GN=TDR PE=1 SV=1	GO:0004672(protein kinase activity);GO:0005524(ATP binding);GO:0005886(plasma membrane);GO:0006468(protein phosphorylation);GO:0016021(integral component of membrane)	COG4886(leucine Rich Repeat)	NA	NA	NA	NA(NA)	A0A072VPG1.1 PF00069.23;Pkinase;	77.54	20.05	2.19482	up	1.15774e-07	5.28523e-06	yes
TRINITY_DN22339_c1_g1	990	TRINITY_DN22339_c1_g1_i1;TRINITY_DN22339_c1_g1_i2;TRINITY_DN22339_c1_g1_i3;TRINITY_DN22339_c1_g1_i4;TRINITY_DN22339_c1_g1_i5;TRINITY_DN22339_c1_g1_i6;TRINITY_DN22339_c1_g1_i7;TRINITY_DN22339_c1_g1_i8;TRINITY_DN22339_c1_g1_i9	(+)-neomenthol dehydrogenase [Medicago truncatula]	SDR1	(+)-neomenthol dehydrogenase OS=Arabidopsis thaliana GN=SDR1 PE=1 SV=1	GO:0005737(cytoplasm);GO:0009505(plant-type cell wall);GO:0016491(oxidoreductase activity)	COG1028(Dehydrogenase reductase)	K15095	(+)-neomenthol dehydrogenase	EC:1.1.1.208	mtr00902(Monoterpenoid biosynthesis)	A0A072TZH4.1 PF00106.23;adh_short;	57.93	14.39	2.26394	up	1.20735e-07	5.50265e-06	yes
TRINITY_DN21889_c0_g1	3591	TRINITY_DN21889_c0_g1_i1;TRINITY_DN21889_c0_g1_i2;TRINITY_DN21889_c0_g1_i3	calmodulin-binding transcription activator 1 isoform X1 [Medicago truncatula]	CMTA3	Calmodulin-binding transcription activator 3 OS=Arabidopsis thaliana GN=CMTA3 PE=1 SV=1	GO:0005634(nucleus);GO:0043565(sequence-specific DNA binding);GO:0045944(positive regulation of transcription by RNA polymerase II)	ENOG41128X0(calmodulin-binding transcription activator)	NA	NA	NA	NA(NA)	A0A072TTJ2.1 PF03859.14;CG-1;	17.5	4.24	2.26869	up	1.2182e-07	5.54301e-06	yes
TRINITY_DN16920_c0_g1	1154	TRINITY_DN16920_c0_g1_i1;TRINITY_DN16920_c0_g1_i10;TRINITY_DN16920_c0_g1_i11;TRINITY_DN16920_c0_g1_i12;TRINITY_DN16920_c0_g1_i13;TRINITY_DN16920_c0_g1_i14;TRINITY_DN16920_c0_g1_i15;TRINITY_DN16920_c0_g1_i16;TRINITY_DN16920_c0_g1_i17;TRINITY_DN16920_c0_g1_i18;TRINITY_DN16920_c0_g1_i19;TRINITY_DN16920_c0_g1_i2;TRINITY_DN16920_c0_g1_i20;TRINITY_DN16920_c0_g1_i3;TRINITY_DN16920_c0_g1_i4;TRINITY_DN169…	beta-carotene hydroxylase 2, chloroplastic [Medicago truncatula]	CA2	Beta-carotene hydroxylase 2, chloroplastic (Fragment) OS=Capsicum annuum GN=CA2 PE=2 SV=1	GO:0005506(iron ion binding);GO:0009507(chloroplast);GO:0010291(carotene beta-ring hydroxylase activity);GO:0016021(integral component of membrane);GO:0016119(carotene metabolic process);GO:0016123(xanthophyll biosynthetic process);GO:0016491(oxidoreductase activity);GO:0016787(hydrolase activity);GO:0031969(chloroplast membrane);GO:0055114(oxidation-reduction process)	ENOG4111G77(Beta-carotene hydroxylase)	K15746	beta-carotene 3-hydroxylase	EC:1.14.15.24	mtr00906(Carotenoid biosynthesis)	A0A067ENN8.1 PF04116.11;FA_hydroxylase;	106.62	36.22	1.80979	up	1.2418e-07	5.64113e-06	yes
TRINITY_DN16394_c0_g2	1766	TRINITY_DN16394_c0_g2_i1;TRINITY_DN16394_c0_g2_i2	probable LRR receptor-like serine/threonine-protein kinase At3g47570 isoform X2 [Medicago truncatula]	At3g47570	Probable LRR receptor-like serine/threonine-protein kinase At3g47570 OS=Arabidopsis thaliana GN=At3g47570 PE=2 SV=1	GO:0004674(protein serine/threonine kinase activity);GO:0005524(ATP binding);GO:0005886(plasma membrane);GO:0006468(protein phosphorylation);GO:0007169(transmembrane receptor protein tyrosine kinase signaling pathway);GO:0016021(integral component of membrane);GO:0016301(kinase activity)	COG0515(Serine Threonine protein kinase);COG4886(leucine Rich Repeat)	NA	NA	NA	NA(NA)	G7KGZ6.1 PF00069.23;Pkinase;	18.97	4.08	2.43966	up	1.30513e-07	5.91915e-06	yes
TRINITY_DN16137_c0_g2	1213	TRINITY_DN16137_c0_g2_i1;TRINITY_DN16137_c0_g2_i2	cytidine deaminase 1 [Medicago truncatula]	CDA1	Cytidine deaminase 1 OS=Arabidopsis thaliana GN=CDA1 PE=1 SV=1	GO:0004126(cytidine deaminase activity);GO:0005829(cytosol);GO:0008270(zinc ion binding);GO:0009972(cytidine deamination)	COG0295(cytidine deaminase)	K01489	cytidine deaminase	EC:3.5.4.5	mtr00240(Pyrimidine metabolism)	G7KJU9.1 PF08211.10;dCMP_cyt_deam_2;	6.8	65.38	-2.83096	down	1.31387e-07	5.94905e-06	yes
TRINITY_DN18351_c1_g3	612	TRINITY_DN18351_c1_g3_i1	uncharacterized protein LOC11424619 [Medicago truncatula]	-	-	-	ENOG410Z7U7(Conserved gene of)	-	-	-	-	-	36.28	3.21	3.64296	up	1.34518e-07	6.08092e-06	yes
TRINITY_DN17468_c0_g1	2371	TRINITY_DN17468_c0_g1_i1;TRINITY_DN17468_c0_g1_i2;TRINITY_DN17468_c0_g1_i3;TRINITY_DN17468_c0_g1_i4;TRINITY_DN17468_c0_g1_i5;TRINITY_DN17468_c0_g1_i6;TRINITY_DN17468_c0_g1_i7;TRINITY_DN17468_c0_g1_i8;TRINITY_DN17468_c0_g1_i9	BTB/POZ and TAZ domain protein [Medicago truncatula]	BT4	BTB/POZ and TAZ domain-containing protein 4 OS=Arabidopsis thaliana GN=BT4 PE=1 SV=1	GO:0003712(transcription cofactor activity);GO:0004402(histone acetyltransferase activity);GO:0005516(calmodulin binding);GO:0005634(nucleus);GO:0005737(cytoplasm);GO:0006355(regulation of transcription, DNA-templated);GO:0008270(zinc ion binding);GO:0009409(response to cold);GO:0009733(response to auxin);GO:0009751(response to salicylic acid);GO:0010200(response to chitin);GO:0019005(SCF ubiquit…	ENOG410Z8TC(BTB POZ and TAZ domain-containing protein)	K02987	small subunit ribosomal protein S4e	-	zma03010(Ribosome)	G7K3T5.2 PF02135.14;zf-TAZ;	5.25	26.83	-2.19728	down	1.36097e-07	6.13349e-06	yes
TRINITY_DN14195_c0_g1	1497	TRINITY_DN14195_c0_g1_i1;TRINITY_DN14195_c0_g1_i2	F-box/kelch-repeat protein At1g80440 [Medicago truncatula]	At1g80440	F-box/kelch-repeat protein At1g80440 OS=Arabidopsis thaliana GN=At1g80440 PE=2 SV=1	GO:0003674(molecular_function);GO:0005634(nucleus);GO:0005829(cytosol);GO:0019005(SCF ubiquitin ligase complex);GO:0030162(regulation of proteolysis);GO:0031625(ubiquitin protein ligase binding);GO:0043161(proteasome-mediated ubiquitin-dependent protein catabolic process);GO:0080037(negative regulation of cytokinin-activated signaling pathway);GO:2000762(regulation of phenylpropanoid metabolic pr…	ENOG4110X8D(Kelch repeat-containing F-box family protein)	-	-	-	-	G7II60.2 PF13964.4;Kelch_6;	5.89	56.87	-3.08287	down	1.36123e-07	6.13349e-06	yes
TRINITY_DN14766_c1_g1	829	TRINITY_DN14766_c1_g1_i1;TRINITY_DN14766_c1_g1_i10;TRINITY_DN14766_c1_g1_i11;TRINITY_DN14766_c1_g1_i12;TRINITY_DN14766_c1_g1_i13;TRINITY_DN14766_c1_g1_i2;TRINITY_DN14766_c1_g1_i3;TRINITY_DN14766_c1_g1_i4;TRINITY_DN14766_c1_g1_i5;TRINITY_DN14766_c1_g1_i6;TRINITY_DN14766_c1_g1_i7;TRINITY_DN14766_c1_g1_i8;TRINITY_DN14766_c1_g1_i9	early light-induced protein, chloroplastic [Medicago truncatula]	-	Early light-induced protein, chloroplastic OS=Pisum sativum PE=2 SV=1	GO:0009409(response to cold);GO:0009507(chloroplast);GO:0009522(photosystem I);GO:0009523(photosystem II);GO:0009535(chloroplast thylakoid membrane);GO:0010030(positive regulation of seed germination);GO:0010117(photoprotection);GO:0010380(regulation of chlorophyll biosynthetic process);GO:0015979(photosynthesis);GO:0016021(integral component of membrane);GO:0016168(chlorophyll binding);GO:003460…	ENOG410Y0RG(early light-induced protein)	NA	NA	NA	NA(NA)	A0A072VP35.1 PF00504.19;Chloroa_b-bind;	225.43	8.89	4.82206	up	1.37657e-07	6.19257e-06	yes
TRINITY_DN17257_c0_g1	674	TRINITY_DN17257_c0_g1_i1;TRINITY_DN17257_c0_g1_i2;TRINITY_DN17257_c0_g1_i3;TRINITY_DN17257_c0_g1_i4;TRINITY_DN17257_c0_g1_i5;TRINITY_DN17257_c0_g1_i6	-	-	-	-	-	-	-	-	-	-	0.62	13.65	-4.50521	down	1.39457e-07	6.26339e-06	yes
TRINITY_DN13210_c0_g1	461	TRINITY_DN13210_c0_g1_i1;TRINITY_DN13210_c0_g1_i2;TRINITY_DN13210_c0_g1_i3;TRINITY_DN13210_c0_g1_i4;TRINITY_DN13210_c0_g1_i5;TRINITY_DN13210_c0_g1_i6;TRINITY_DN13210_c0_g1_i7;TRINITY_DN13210_c0_g1_i8	uncharacterized protein LOC112417093 [Medicago truncatula]	-	-	-	-	-	-	-	-	-	157.69	12.13	3.97938	up	1.4288e-07	6.40091e-06	yes
TRINITY_DN17651_c0_g4	1583	TRINITY_DN17651_c0_g4_i1	RNA-binding region RNP-1 (RNA recognition motif) [Medicago truncatula]	-	-	-	-	-	-	-	-	G7JX57.2 PF14111.4;DUF4283;	0.01	1.72	-6.81496	down	1.43185e-07	6.40091e-06	yes
TRINITY_DN17511_c1_g2	953	TRINITY_DN17511_c1_g2_i1;TRINITY_DN17511_c1_g2_i2;TRINITY_DN17511_c1_g2_i3	-	-	-	-	-	-	-	-	-	-	0.4	7.46	-4.38309	down	1.43211e-07	6.40091e-06	yes
TRINITY_DN20811_c0_g3	615	TRINITY_DN20811_c0_g3_i1	putative transcription factor TIFY family [Medicago truncatula]	TIFY5A	Protein TIFY 5A OS=Arabidopsis thaliana GN=TIFY5A PE=1 SV=1	GO:0003714(transcription corepressor activity);GO:0005634(nucleus);GO:0009611(response to wounding);GO:0031347(regulation of defense response);GO:1903507(negative regulation of nucleic acid-templated transcription);GO:2000022(regulation of jasmonic acid mediated signaling pathway)	ENOG410Z61E(TIFY 5A-like)	K13464	jasmonate ZIM domain-containing protein	-	egr04075(Plant hormone signal transduction)	-	23.39	2.15	3.60355	up	1.43985e-07	6.42518e-06	yes
TRINITY_DN25938_c0_g1	397	TRINITY_DN25938_c0_g1_i1;TRINITY_DN25938_c0_g1_i2;TRINITY_DN25938_c0_g1_i3	inositol-3-phosphate synthase [Medicago truncatula]	INPS1	Inositol-3-phosphate synthase OS=Nicotiana paniculata GN=INPS1 PE=2 SV=1	GO:0004512(inositol-3-phosphate synthase activity);GO:0005515(protein binding);GO:0005737(cytoplasm);GO:0006021(inositol biosynthetic process);GO:0008654(phospholipid biosynthetic process);GO:0009408(response to heat);GO:0009644(response to high light intensity);GO:0009733(response to auxin);GO:0009793(embryo development ending in seed dormancy);GO:0010264(myo-inositol hexakisphosphate biosynthet…	COG1260(synthase)	K01858	myo-inositol-1-phosphate synthase	EC:5.5.1.4	mtr00562(Inositol phosphate metabolism)	I1KT48.1 PF07994.10;NAD_binding_5;	446.63	135.06	1.93688	up	1.45439e-07	6.4796e-06	yes
TRINITY_DN15171_c0_g1	1376	TRINITY_DN15171_c0_g1_i1;TRINITY_DN15171_c0_g1_i2;TRINITY_DN15171_c0_g1_i3	E3 ubiquitin-protein ligase RMA1H1 [Medicago truncatula]	RMA1H1	E3 ubiquitin-protein ligase RMA1H1 OS=Capsicum annuum GN=RMA1H1 PE=1 SV=1	GO:0004842(ubiquitin-protein transferase activity);GO:0005515(protein binding);GO:0005789(endoplasmic reticulum membrane);GO:0006970(response to osmotic stress);GO:0009409(response to cold);GO:0009414(response to water deprivation);GO:0009611(response to wounding);GO:0009723(response to ethylene);GO:0016567(protein ubiquitination);GO:0043161(proteasome-mediated ubiquitin-dependent protein catabol…	ENOG4111IHV(Ring finger protein)	K10666	E3 ubiquitin-protein ligase RNF5	EC:2.3.2.27	mtr04141(Protein processing in endoplasmic reticulum)	A0A072U1G6.1 PF00097.23;zf-C3HC4;	3.46	51.55	-3.59226	down	1.4926e-07	6.63922e-06	yes
TRINITY_DN17375_c0_g4	589	TRINITY_DN17375_c0_g4_i1	-	-	-	-	-	-	-	-	-	-	28.33	4.31	2.91143	up	1.51532e-07	6.72948e-06	yes
TRINITY_DN17536_c1_g3	473	TRINITY_DN17536_c1_g3_i1	hypothetical protein MTR_5g045980 [Medicago truncatula]	-	-	-	-	-	-	-	-	-	27.29	0.04	9.22172	up	1.54719e-07	6.85555e-06	yes
TRINITY_DN14803_c0_g2	903	TRINITY_DN14803_c0_g2_i1;TRINITY_DN14803_c0_g2_i2;TRINITY_DN14803_c0_g2_i3	uncharacterized protein LOC11423658 [Medicago truncatula]	-	-	GO:0003674(molecular_function);GO:0008150(biological_process);GO:0009507(chloroplast)	ENOG410YTD2(NA)	-	-	-	-	G7KVC2.1 PF05553.9;DUF761;	2.58	24.86	-3.06424	down	1.54865e-07	6.85555e-06	yes
TRINITY_DN16979_c0_g1	2112	TRINITY_DN16979_c0_g1_i1;TRINITY_DN16979_c0_g1_i10;TRINITY_DN16979_c0_g1_i11;TRINITY_DN16979_c0_g1_i12;TRINITY_DN16979_c0_g1_i13;TRINITY_DN16979_c0_g1_i14;TRINITY_DN16979_c0_g1_i15;TRINITY_DN16979_c0_g1_i16;TRINITY_DN16979_c0_g1_i2;TRINITY_DN16979_c0_g1_i3;TRINITY_DN16979_c0_g1_i4;TRINITY_DN16979_c0_g1_i5;TRINITY_DN16979_c0_g1_i6;TRINITY_DN16979_c0_g1_i7;TRINITY_DN16979_c0_g1_i8;TRINITY_DN16979_c…	tubby-like F-box protein 3 [Medicago truncatula]	TULP3	Tubby-like F-box protein 3 OS=Arabidopsis thaliana GN=TULP3 PE=1 SV=1	GO:0005929(cilium);GO:0035091(phosphatidylinositol binding);GO:0061512(protein localization to cilium)	ENOG410XQFT(tubby like protein)	NA	NA	NA	NA(NA)	G7ISK0.1 PF01167.16;Tub;	10.93	45.5	-1.85741	down	1.56126e-07	6.90037e-06	yes
TRINITY_DN13576_c0_g2	1278	TRINITY_DN13576_c0_g2_i1;TRINITY_DN13576_c0_g2_i2;TRINITY_DN13576_c0_g2_i3;TRINITY_DN13576_c0_g2_i4;TRINITY_DN13576_c0_g2_i5;TRINITY_DN13576_c0_g2_i6;TRINITY_DN13576_c0_g2_i7;TRINITY_DN13576_c0_g2_i8	isoleucine N-monooxygenase 2 [Medicago truncatula]	CYP79D3	Isoleucine N-monooxygenase 1 OS=Lotus japonicus GN=CYP79D3 PE=1 SV=1	GO:0016020(membrane);GO:0016709(oxidoreductase activity, acting on paired donors, with incorporation or reduction of molecular oxygen, NAD(P)H as one donor, and incorporation of one atom of oxygen);GO:0044550(secondary metabolite biosynthetic process)	COG2124(Cytochrome p450)	K12153	phenylalanine N-monooxygenase	EC:1.14.14.40	mtr00460(Cyanoamino acid metabolism);mtr00966(Glucosinolate biosynthesis)	A0A072UZE3.1 PF00067.20;p450;	11.45	0.65	4.39032	up	1.56748e-07	6.91685e-06	yes
TRINITY_DN16096_c0_g1	1455	TRINITY_DN16096_c0_g1_i1;TRINITY_DN16096_c0_g1_i2	TMV resistance protein N [Medicago truncatula]	At4g11170	Putative disease resistance protein At4g11170 OS=Arabidopsis thaliana GN=At4g11170 PE=2 SV=1	GO:0005737(cytoplasm);GO:0005739(mitochondrion);GO:0006952(defense response);GO:0007165(signal transduction);GO:0010193(response to ozone);GO:0043531(ADP binding)	-	NA	NA	NA	NA(NA)	G7L6R8.2 PF00931.20;NB-ARC;	31.03	5.42	2.63521	up	1.66342e-07	7.32857e-06	yes
TRINITY_DN22981_c0_g1	1606	TRINITY_DN22981_c0_g1_i1;TRINITY_DN22981_c0_g1_i10;TRINITY_DN22981_c0_g1_i2;TRINITY_DN22981_c0_g1_i3;TRINITY_DN22981_c0_g1_i4;TRINITY_DN22981_c0_g1_i5;TRINITY_DN22981_c0_g1_i6;TRINITY_DN22981_c0_g1_i7;TRINITY_DN22981_c0_g1_i8;TRINITY_DN22981_c0_g1_i9	NAC domain-containing protein 72 [Medicago truncatula]	NAC055	NAC domain-containing protein 55 OS=Arabidopsis thaliana GN=NAC055 PE=2 SV=1	GO:0003677(DNA binding);GO:0003700(DNA binding transcription factor activity);GO:0005515(protein binding);GO:0005634(nucleus);GO:0006351(transcription, DNA-templated);GO:0006355(regulation of transcription, DNA-templated);GO:0007275(multicellular organism development);GO:0009414(response to water deprivation);GO:0009867(jasmonic acid mediated signaling pathway)	ENOG4111FG3(nac domain)	NA	NA	NA	NA(NA)	E0CSQ1.1 PF02365.13;NAM;	36.5	9.36	2.01684	up	1.69733e-07	7.46612e-06	yes
TRINITY_DN16537_c0_g1	1282	TRINITY_DN16537_c0_g1_i1;TRINITY_DN16537_c0_g1_i2;TRINITY_DN16537_c0_g1_i3;TRINITY_DN16537_c0_g1_i4	putative SWEET sugar transporter [Medicago truncatula]	SWEET14	Bidirectional sugar transporter SWEET14 OS=Oryza sativa subsp. indica GN=SWEET14 PE=2 SV=1	GO:0008643(carbohydrate transport);GO:0016021(integral component of membrane);GO:0051119(sugar transmembrane transporter activity)	ENOG4111M4R(sugar transporter)	NA	NA	NA	NA(NA)	I1JXN0.2 PF03083.14;MtN3_slv;	62.01	15.73	2.23814	up	1.73902e-07	7.63739e-06	yes
TRINITY_DN14072_c0_g2	1000	TRINITY_DN14072_c0_g2_i1	calcium uniporter protein 5, mitochondrial [Medicago truncatula]	At1g09575	Calcium uniporter protein 6, mitochondrial OS=Arabidopsis thaliana GN=At1g09575 PE=2 SV=1	GO:0015292(uniporter activity)	ENOG410Y3YU(Coiled-coil domain containing 109B)	NA	NA	NA	NA(NA)	A0A072UXK6.1 PF04678.11;MCU;	3.15	0.1	5.0749	up	1.76256e-07	7.72852e-06	yes
TRINITY_DN19627_c1_g1	871	TRINITY_DN19627_c1_g1_i1;TRINITY_DN19627_c1_g1_i2	-	-	-	-	-	-	-	-	-	-	0	16.49	-11.0517	down	1.77843e-07	7.76954e-06	yes
TRINITY_DN21322_c1_g4	877	TRINITY_DN21322_c1_g4_i1	uncharacterized protein LOC11415031 [Medicago truncatula]	-	-	GO:0003674(molecular_function);GO:0005634(nucleus);GO:0008150(biological_process)	ENOG410ZEVS(NA)	-	-	-	-	G7J3S5.2 PF00168.28;C2;	7.16	0.32	4.61697	up	1.77966e-07	7.76954e-06	yes
TRINITY_DN14344_c2_g1	845	TRINITY_DN14344_c2_g1_i1	putative transcription factor C2H2 family [Medicago truncatula]	ATL31	E3 ubiquitin-protein ligase ATL31 OS=Arabidopsis thaliana GN=ATL31 PE=1 SV=2	GO:0004842(ubiquitin-protein transferase activity);GO:0005576(extracellular region);GO:0008270(zinc ion binding);GO:0009737(response to abscisic acid);GO:0009814(defense response, incompatible interaction);GO:0009816(defense response to bacterium, incompatible interaction);GO:0010200(response to chitin);GO:0016020(membrane);GO:0016021(integral component of membrane);GO:0016567(protein ubiquitinat…	ENOG41121N2(zinc ion binding)	NA	NA	NA	NA(NA)	A0A072W088.1 PF13639.4;zf-RING_2;	10.61	0.76	3.98445	up	1.78031e-07	7.76954e-06	yes
TRINITY_DN15806_c0_g5	970	TRINITY_DN15806_c0_g5_i1;TRINITY_DN15806_c0_g5_i2	toll/interleukin-1 receptor-like protein [Medicago truncatula]	-	TMV resistance protein N OS=Nicotiana glutinosa GN=N PE=1 SV=1	GO:0005515(protein binding)	-	K13414	mitogen-activated protein kinase kinase kinase 1	EC:2.7.11.25	mdm04016(MAPK signaling pathway - plant);mdm04626(Plant-pathogen interaction)	G7K8D5.1 PF01582.18;TIR;	49.94	12.61	1.96099	up	1.79338e-07	7.80344e-06	yes
TRINITY_DN21334_c0_g2	683	TRINITY_DN21334_c0_g2_i1	calcium-binding protein PBP1 [Medicago truncatula]	PBP1	Calcium-binding protein PBP1 OS=Arabidopsis thaliana GN=PBP1 PE=1 SV=1	GO:0005509(calcium ion binding)	COG5126(Calcium-binding protein)	NA	NA	NA	NA(NA)	B7FH70.1 PF13833.4;EF-hand_8;	108.81	22.36	2.5046	up	1.7937e-07	7.80344e-06	yes
TRINITY_DN14171_c0_g1	437	TRINITY_DN14171_c0_g1_i1;TRINITY_DN14171_c0_g1_i2;TRINITY_DN14171_c0_g1_i3	cyclin-dependent protein kinase inhibitor SMR6 [Medicago truncatula]	SMR6	Cyclin-dependent protein kinase inhibitor SMR6 OS=Arabidopsis thaliana GN=SMR6 PE=1 SV=1	GO:0004860(protein kinase inhibitor activity);GO:0005515(protein binding);GO:0005575(cellular_component);GO:0007049(cell cycle)	ENOG411155J(NA)	-	-	-	-	-	154.3	32.54	2.39085	up	1.86149e-07	8.0857e-06	yes
TRINITY_DN12711_c0_g1	550	TRINITY_DN12711_c0_g1_i1	monothiol glutaredoxin-S9 [Medicago truncatula]	GRXC9	Glutaredoxin-C9 OS=Arabidopsis thaliana GN=GRXC9 PE=1 SV=1	GO:0005515(protein binding);GO:0005634(nucleus);GO:0005737(cytoplasm);GO:0009055(electron transfer activity);GO:0009751(response to salicylic acid);GO:0009863(salicylic acid mediated signaling pathway);GO:0009867(jasmonic acid mediated signaling pathway);GO:0015035(protein disulfide oxidoreductase activity);GO:0045454(cell redox homeostasis)	COG0695(Glutaredoxin)	NA	NA	NA	NA(NA)	I3SBB1.1 PF00462.22;Glutaredoxin;	13.25	0.95	3.9366	up	1.88425e-07	8.17175e-06	yes
TRINITY_DN8009_c0_g1	570	TRINITY_DN8009_c0_g1_i1;TRINITY_DN8009_c0_g1_i2	-	-	-	-	-	-	-	-	-	-	4.98	0.03	6.79104	up	1.89879e-07	8.22199e-06	yes
TRINITY_DN18855_c0_g7	497	TRINITY_DN18855_c0_g7_i1	-	-	-	-	-	-	-	-	-	-	9.05	0.29	5.07036	up	1.91383e-07	8.26452e-06	yes
TRINITY_DN16203_c0_g1	752	TRINITY_DN16203_c0_g1_i1;TRINITY_DN16203_c0_g1_i2;TRINITY_DN16203_c0_g1_i3;TRINITY_DN16203_c0_g1_i4;TRINITY_DN16203_c0_g1_i5;TRINITY_DN16203_c0_g1_i6;TRINITY_DN16203_c0_g1_i7	protein NRT1/ PTR FAMILY 1.2 [Medicago truncatula]	NPF1.2	Protein NRT1/ PTR FAMILY 1.2 OS=Arabidopsis thaliana GN=NPF1.2 PE=1 SV=1	GO:0005215(transporter activity);GO:0005886(plasma membrane);GO:0006857(oligopeptide transport);GO:0015706(nitrate transport);GO:0016020(membrane);GO:0016021(integral component of membrane);GO:0055085(transmembrane transport);GO:0080054(low-affinity nitrate transmembrane transporter activity)	COG3104(transporter)	NA	NA	NA	NA(NA)	Q2HU41.1 PF00854.19;PTR2;	58.47	11.77	2.36535	up	1.91457e-07	8.26452e-06	yes
TRINITY_DN25542_c0_g1	2103	TRINITY_DN25542_c0_g1_i1;TRINITY_DN25542_c0_g1_i10;TRINITY_DN25542_c0_g1_i11;TRINITY_DN25542_c0_g1_i12;TRINITY_DN25542_c0_g1_i13;TRINITY_DN25542_c0_g1_i14;TRINITY_DN25542_c0_g1_i15;TRINITY_DN25542_c0_g1_i16;TRINITY_DN25542_c0_g1_i17;TRINITY_DN25542_c0_g1_i18;TRINITY_DN25542_c0_g1_i19;TRINITY_DN25542_c0_g1_i2;TRINITY_DN25542_c0_g1_i3;TRINITY_DN25542_c0_g1_i4;TRINITY_DN25542_c0_g1_i5;TRINITY_DN2554…	protein PIN-LIKES 7 [Medicago truncatula]	PILS7	Protein PIN-LIKES 7 OS=Arabidopsis thaliana GN=PILS7 PE=2 SV=1	GO:0005789(endoplasmic reticulum membrane);GO:0009672(auxin:proton symporter activity);GO:0009733(response to auxin);GO:0009734(auxin-activated signaling pathway);GO:0009926(auxin polar transport);GO:0016021(integral component of membrane);GO:0055085(transmembrane transport)	COG0679(Auxin Efflux Carrier)	NA	NA	NA	NA(NA)	G7K1C3.1 PF03547.16;Mem_trans;	36.75	8.32	2.1135	up	1.96733e-07	8.47905e-06	yes
TRINITY_DN22250_c0_g1	1513	TRINITY_DN22250_c0_g1_i1;TRINITY_DN22250_c0_g1_i2;TRINITY_DN22250_c0_g1_i3;TRINITY_DN22250_c0_g1_i4;TRINITY_DN22250_c0_g1_i5;TRINITY_DN22250_c0_g1_i6;TRINITY_DN22250_c0_g1_i7;TRINITY_DN22250_c0_g1_i8;TRINITY_DN22250_c0_g1_i9	hypothetical protein L195_g007691 [Trifolium pratense]	-	-	GO:0003674(molecular_function);GO:0008150(biological_process);GO:0009507(chloroplast);GO:0009535(chloroplast thylakoid membrane)	ENOG410Z0PS(NA)	-	-	-	-	-	14.31	63.37	-1.9405	down	2.01847e-07	8.68598e-06	yes
TRINITY_DN18306_c0_g1	2543	TRINITY_DN18306_c0_g1_i1;TRINITY_DN18306_c0_g1_i2;TRINITY_DN18306_c0_g1_i3;TRINITY_DN18306_c0_g1_i4	F-box protein MAX2 [Medicago truncatula]	MAX2A	F-box/LRR-repeat MAX2 homolog A OS=Petunia hybrida GN=MAX2A PE=1 SV=1	GO:0000151(ubiquitin ligase complex);GO:0004842(ubiquitin-protein transferase activity);GO:0005515(protein binding);GO:0005634(nucleus);GO:0006511(ubiquitin-dependent protein catabolic process);GO:0007568(aging);GO:0009414(response to water deprivation);GO:0009416(response to light stimulus);GO:0009734(auxin-activated signaling pathway);GO:0009926(auxin polar transport);GO:0009934(regulation of m…	ENOG4110R60(regulation of meristem structural organization)	NA	NA	NA	NA(NA)	-	3.18	13.47	-1.93204	down	2.02976e-07	8.72104e-06	yes
TRINITY_DN15526_c0_g1	735	TRINITY_DN15526_c0_g1_i1;TRINITY_DN15526_c0_g1_i2	-	-	-	-	-	-	-	-	-	-	10.08	0.04	7.87598	up	2.09744e-07	8.99793e-06	yes
TRINITY_DN14999_c0_g1	2535	TRINITY_DN14999_c0_g1_i1;TRINITY_DN14999_c0_g1_i2;TRINITY_DN14999_c0_g1_i3	U-box domain-containing protein 16 [Medicago truncatula]	PUB16	U-box domain-containing protein 16 OS=Arabidopsis thaliana GN=PUB16 PE=2 SV=1	GO:0005634(nucleus);GO:0005737(cytoplasm)	ENOG410XQT6(Ubox domain-containing protein)	NA	NA	NA	NA(NA)	A0A072UHQ2.1 PF04564.13;U-box;	17.11	5.04	1.9371	up	2.11769e-07	9.07079e-06	yes
TRINITY_DN22205_c0_g1	585	TRINITY_DN22205_c0_g1_i1;TRINITY_DN22205_c0_g1_i2;TRINITY_DN22205_c0_g1_i3;TRINITY_DN22205_c0_g1_i4;TRINITY_DN22205_c0_g1_i5;TRINITY_DN22205_c0_g1_i6;TRINITY_DN22205_c0_g1_i7	-	-	-	-	-	-	-	-	-	-	69.52	11.09	2.93333	up	2.13998e-07	9.1521e-06	yes
TRINITY_DN12444_c0_g2	906	TRINITY_DN12444_c0_g2_i1	NDR1/HIN1-like protein 10 [Medicago truncatula]	YLS9	Protein YLS9 OS=Arabidopsis thaliana GN=YLS9 PE=2 SV=1	GO:0006952(defense response);GO:0009506(plasmodesma);GO:0046658(anchored component of plasma membrane)	ENOG410YGQV(harpin-induced protein 1 domain containing protein, expressed)	-	-	-	-	A0A072U3C0.1 PF03168.11;LEA_2;	11.12	1.04	3.59503	up	2.1959e-07	9.37409e-06	yes
TRINITY_DN12541_c0_g1	528	TRINITY_DN12541_c0_g1_i1;TRINITY_DN12541_c0_g1_i2;TRINITY_DN12541_c0_g1_i3;TRINITY_DN12541_c0_g1_i4;TRINITY_DN12541_c0_g1_i5;TRINITY_DN12541_c0_g1_i6	hypothetical protein TSUD_261090 [Trifolium subterraneum]	-	-	-	-	-	-	-	-	-	14.27	0.47	5.30435	up	2.19864e-07	9.37409e-06	yes
TRINITY_DN23858_c1_g4	1074	TRINITY_DN23858_c1_g4_i1	glycoside hydrolase family 18 protein [Medicago truncatula]	CHIT3	Acidic endochitinase OS=Vitis vinifera GN=CHIT3 PE=2 SV=1	GO:0004568(chitinase activity);GO:0005576(extracellular region);GO:0006032(chitin catabolic process);GO:0008061(chitin binding)	ENOG4111GPA(chitinase)	K01183	chitinase	EC:3.2.1.14	mtr00520(Amino sugar and nucleotide sugar metabolism)	G7L3Z3.2 PF00704.26;Glyco_hydro_18;	17.85	2.4	3.0769	up	2.26314e-07	9.6343e-06	yes
TRINITY_DN22378_c0_g1	2276	TRINITY_DN22378_c0_g1_i1;TRINITY_DN22378_c0_g1_i2;TRINITY_DN22378_c0_g1_i3;TRINITY_DN22378_c0_g1_i4	putative S-adenosyl-L-methionine-dependent methyltransferase [Medicago truncatula]	At2g45750	Probable methyltransferase PMT16 OS=Arabidopsis thaliana GN=At2g45750 PE=3 SV=1	GO:0005768(endosome);GO:0005774(vacuolar membrane);GO:0005802(trans-Golgi network);GO:0008757(S-adenosylmethionine-dependent methyltransferase activity);GO:0032259(methylation)	ENOG410YAWV(Methyltransferase)	NA	NA	NA	NA(NA)	V7C5Y4.1 PF03141.14;Methyltransf_29;	2.33	13.31	-2.31536	down	2.30739e-07	9.80766e-06	yes
TRINITY_DN25849_c0_g2	822	TRINITY_DN25849_c0_g2_i1	putative transcription factor AP2-EREBP family [Medicago truncatula]	ERF023	Ethylene-responsive transcription factor ERF023 OS=Arabidopsis thaliana GN=ERF023 PE=2 SV=1	GO:0003677(DNA binding);GO:0003700(DNA binding transcription factor activity);GO:0005634(nucleus);GO:0006351(transcription, DNA-templated);GO:0006355(regulation of transcription, DNA-templated);GO:0009873(ethylene-activated signaling pathway)	ENOG4111AQ4(AP2)	NA	NA	NA	NA(NA)	G7JRD3.2 PF00847.18;AP2;	13.24	1.37	3.45731	up	2.31494e-07	9.8247e-06	yes
TRINITY_DN24106_c1_g3	1843	TRINITY_DN24106_c1_g3_i1	L-ascorbate oxidase homolog [Medicago truncatula]	-	L-ascorbate oxidase homolog OS=Nicotiana tabacum PE=2 SV=1	GO:0005507(copper ion binding);GO:0009505(plant-type cell wall);GO:0009506(plasmodesma);GO:0016722(oxidoreductase activity, oxidizing metal ions)	COG2132(Multicopper oxidase)	NA	NA	NA	NA(NA)	I1LPF6.2 PF07731.12;Cu-oxidase_2;	22.15	4.15	2.59599	up	2.32343e-07	9.84568e-06	yes
TRINITY_DN18924_c0_g1	2277	TRINITY_DN18924_c0_g1_i1;TRINITY_DN18924_c0_g1_i10;TRINITY_DN18924_c0_g1_i2;TRINITY_DN18924_c0_g1_i3;TRINITY_DN18924_c0_g1_i4;TRINITY_DN18924_c0_g1_i5;TRINITY_DN18924_c0_g1_i6;TRINITY_DN18924_c0_g1_i7;TRINITY_DN18924_c0_g1_i8;TRINITY_DN18924_c0_g1_i9	calcium-binding EF-hand protein [Medicago truncatula]	CML48	Probable calcium-binding protein CML48 OS=Arabidopsis thaliana GN=CML48 PE=2 SV=2	GO:0004198(calcium-dependent cysteine-type endopeptidase activity);GO:0005737(cytoplasm);GO:0006508(proteolysis)	ENOG410YKQK(grancalcin, EF-hand calcium binding protein)	K13448	calcium-binding protein CML	-	mtr04626(Plant-pathogen interaction)	V7BVR3.1 PF13405.4;EF-hand_6;	49.53	20.39	1.85908	up	2.40441e-07	1.01674e-05	yes
TRINITY_DN24183_c0_g1	1702	TRINITY_DN24183_c0_g1_i1;TRINITY_DN24183_c0_g1_i2;TRINITY_DN24183_c0_g1_i3;TRINITY_DN24183_c0_g1_i4;TRINITY_DN24183_c0_g1_i5;TRINITY_DN24183_c0_g1_i6;TRINITY_DN24183_c0_g1_i7	CBL-interacting serine/threonine-protein kinase 7 [Medicago truncatula]	CIPK4	CBL-interacting serine/threonine-protein kinase 4 OS=Arabidopsis thaliana GN=CIPK4 PE=1 SV=1	GO:0004674(protein serine/threonine kinase activity);GO:0005634(nucleus);GO:0005737(cytoplasm);GO:0006468(protein phosphorylation);GO:0035556(intracellular signal transduction)	COG0515(Serine Threonine protein kinase)	NA	NA	NA	NA(NA)	A0A072VHV8.1 PF00069.23;Pkinase;	124.62	38.14	1.87846	up	2.40668e-07	1.01674e-05	yes
TRINITY_DN17375_c0_g6	229	TRINITY_DN17375_c0_g6_i1	unknown [Medicago truncatula]	HSP26-A	Probable glutathione S-transferase OS=Glycine max GN=HSP26-A PE=2 SV=1	GO:0004364(glutathione transferase activity);GO:0005737(cytoplasm);GO:0006749(glutathione metabolic process);GO:0009407(toxin catabolic process)	ENOG410XSIX(glutathione Stransferase)	K00799	glutathione S-transferase	EC:2.5.1.18	mtr00480(Glutathione metabolism)	G7L6H6.2 PF02798.18;GST_N;	853.64	139.08	2.80183	up	2.4874e-07	1.04924e-05	yes
TRINITY_DN17952_c0_g2	758	TRINITY_DN17952_c0_g2_i1;TRINITY_DN17952_c0_g2_i2;TRINITY_DN17952_c0_g2_i3;TRINITY_DN17952_c0_g2_i4;TRINITY_DN17952_c0_g2_i5;TRINITY_DN17952_c0_g2_i6;TRINITY_DN17952_c0_g2_i7	-	-	-	-	-	-	-	-	-	-	2.48	18.84	-3.1694	down	2.53351e-07	1.06707e-05	yes
TRINITY_DN15245_c0_g1	1392	TRINITY_DN15245_c0_g1_i1;TRINITY_DN15245_c0_g1_i2;TRINITY_DN15245_c0_g1_i3;TRINITY_DN15245_c0_g1_i4;TRINITY_DN15245_c0_g1_i5;TRINITY_DN15245_c0_g1_i6	bifunctional UDP-glucose 4-epimerase and UDP-xylose 4-epimerase 1 [Cicer arietinum]	UGE1	Bifunctional UDP-glucose 4-epimerase and UDP-xylose 4-epimerase 1 OS=Pisum sativum GN=UGE1 PE=1 SV=2	GO:0050373(UDP-arabinose 4-epimerase activity)	COG1087(udp-glucose 4-epimerase)	K01784	UDP-glucose 4-epimerase	EC:5.1.3.2	cam00052(Galactose metabolism);cam00520(Amino sugar and nucleotide sugar metabolism)	B7FK31.1 PF16363.3;GDP_Man_Dehyd;	11.26	46.34	-1.77908	down	2.67555e-07	1.12519e-05	yes
TRINITY_DN17499_c0_g4	2057	TRINITY_DN17499_c0_g4_i1;TRINITY_DN17499_c0_g4_i2	putative RNA helicase [Medicago truncatula]	Os06g0535100	Putative DEAD-box ATP-dependent RNA helicase 51 OS=Oryza sativa subsp. japonica GN=Os06g0535100 PE=3 SV=2	GO:0004004(ATP-dependent RNA helicase activity);GO:0010501(RNA secondary structure unwinding)	COG0513(purine NTP-dependent helicase activity)	NA	NA	NA	NA(NA)	A0A072TNW6.1 PF00270.27;DEAD;	0	5.24	-10.8798	down	2.69566e-07	1.13193e-05	yes
TRINITY_DN26186_c2_g1	3569	TRINITY_DN26186_c2_g1_i1;TRINITY_DN26186_c2_g1_i10;TRINITY_DN26186_c2_g1_i11;TRINITY_DN26186_c2_g1_i12;TRINITY_DN26186_c2_g1_i2;TRINITY_DN26186_c2_g1_i3;TRINITY_DN26186_c2_g1_i4;TRINITY_DN26186_c2_g1_i5;TRINITY_DN26186_c2_g1_i6;TRINITY_DN26186_c2_g1_i7;TRINITY_DN26186_c2_g1_i8;TRINITY_DN26186_c2_g1_i9	probable LRR receptor-like serine/threonine-protein kinase At1g56130 isoform X2 [Medicago truncatula]	At1g56130	Probable LRR receptor-like serine/threonine-protein kinase At1g56130 OS=Arabidopsis thaliana GN=At1g56130 PE=2 SV=2	GO:0004674(protein serine/threonine kinase activity);GO:0005886(plasma membrane)	ENOG410XSG4((E 0.0) leucine-rich repeat family protein protein kinase family protein)	NA	NA	NA	NA(NA)	A0A072TPB6.1 PF11721.6;Malectin;	33.73	15.83	1.85767	up	2.71733e-07	1.13931e-05	yes
TRINITY_DN22073_c0_g1	1645	TRINITY_DN22073_c0_g1_i1	uncharacterized protein LOC11414288 [Medicago truncatula]	-	-	GO:0003674(molecular_function);GO:0005575(cellular_component);GO:0008150(biological_process)	ENOG410YEB9(Protein of unknown function (DUF674))	K01593	aromatic-L-amino-acid/L-tryptophan decarboxylase	EC:4.1.1.28 4.1.1.105	mtr00350(Tyrosine metabolism);mtr00360(Phenylalanine metabolism);mtr00380(Tryptophan metabolism);mtr00901(Indole alkaloid biosynthesis);mtr00950(Isoquinoline alkaloid biosynthesis);mtr00965(Betalain biosynthesis)	G7JS94.2 PF05056.10;DUF674;	4.49	33.75	-2.68025	down	2.76311e-07	1.15676e-05	yes
TRINITY_DN13750_c0_g1	1072	TRINITY_DN13750_c0_g1_i1;TRINITY_DN13750_c0_g1_i2;TRINITY_DN13750_c0_g1_i3;TRINITY_DN13750_c0_g1_i4	uncharacterized protein LOC11423798 [Medicago truncatula]	-	-	GO:0004462(lactoylglutathione lyase activity);GO:0005737(cytoplasm);GO:0005975(carbohydrate metabolic process);GO:0016829(lyase activity)	ENOG410XUYC(Glyoxalase Bleomycin resistance protein (Dioxygenase)	NA	NA	NA	NA(NA)	G7KGE7.2 PF00903.23;Glyoxalase;	19.27	150.76	-2.65985	down	2.76943e-07	1.15765e-05	yes
TRINITY_DN11652_c0_g1	605	TRINITY_DN11652_c0_g1_i1	uncharacterized protein LOC25486617 [Medicago truncatula]	-	-	GO:0005634(nucleus);GO:0005737(cytoplasm);GO:0008150(biological_process)	ENOG410YJJA(Protein of unknown function, DUF538)	-	-	-	-	B7FGQ9.1 PF04398.10;DUF538;	5.91	51.36	-2.87796	down	2.82151e-07	1.17765e-05	yes
TRINITY_DN13538_c0_g1	1277	TRINITY_DN13538_c0_g1_i1	uncharacterized protein LOC112419470 [Medicago truncatula]	-	-	-	-	-	-	-	-	G7L640.1 PF13456.4;RVT_3;	10.77	1.66	2.87406	up	2.85783e-07	1.19102e-05	yes
TRINITY_DN15962_c0_g2	886	TRINITY_DN15962_c0_g2_i1;TRINITY_DN15962_c0_g2_i2;TRINITY_DN15962_c0_g2_i3	HSP70 [Medicago ruthenica]	HSC-2	Heat shock cognate 70 kDa protein 2 OS=Solanum lycopersicum GN=HSC-2 PE=2 SV=1	GO:0005524(ATP binding);GO:0005618(cell wall);GO:0005634(nucleus);GO:0005739(mitochondrion);GO:0005774(vacuolar membrane);GO:0005794(Golgi apparatus);GO:0005829(cytosol);GO:0005886(plasma membrane);GO:0006351(transcription, DNA-templated);GO:0006355(regulation of transcription, DNA-templated);GO:0006457(protein folding);GO:0006986(response to unfolded protein);GO:0009266(response to temperature s…	COG0443(Heat shock protein)	K03283	heat shock 70kDa protein 1/2/6/8	-	mtr03040(Spliceosome);mtr04141(Protein processing in endoplasmic reticulum);mtr04144(Endocytosis)	A0A078IS30.1 PF00012.18;HSP70;	1331.25	464.56	1.70397	up	2.88324e-07	1.19981e-05	yes
TRINITY_DN20191_c0_g1	851	TRINITY_DN20191_c0_g1_i1	trehalose-phosphate phosphatase A isoform X1 [Medicago truncatula]	TPPA	Trehalose-phosphate phosphatase A OS=Arabidopsis thaliana GN=TPPA PE=1 SV=1	GO:0004805(trehalose-phosphatase activity);GO:0005634(nucleus);GO:0005992(trehalose biosynthetic process)	COG1877(trehalose biosynthetic process)	K01087	trehalose 6-phosphate phosphatase	EC:3.1.3.12	mtr00500(Starch and sucrose metabolism)	A0A072UI42.1 PF02358.14;Trehalose_PPase;	94.54	23.43	2.2012	up	2.895e-07	1.2029e-05	yes
TRINITY_DN18982_c0_g3	1553	TRINITY_DN18982_c0_g3_i1;TRINITY_DN18982_c0_g3_i2;TRINITY_DN18982_c0_g3_i3;TRINITY_DN18982_c0_g3_i4	3-hydroxy-3-methylglutaryl coenzyme a reductase [Trifolium pratense]	HMGR2	3-hydroxy-3-methylglutaryl-coenzyme A reductase 2 OS=Capsicum annuum GN=HMGR2 PE=2 SV=1	GO:0004420(hydroxymethylglutaryl-CoA reductase (NADPH) activity);GO:0005778(peroxisomal membrane);GO:0005789(endoplasmic reticulum membrane);GO:0008299(isoprenoid biosynthetic process);GO:0016126(sterol biosynthetic process)	COG1257()-reductase)	K00021	hydroxymethylglutaryl-CoA reductase (NADPH)	EC:1.1.1.34	mtr00900(Terpenoid backbone biosynthesis)	V7CIK2.1 PF00368.16;HMG-CoA_red;	267.87	43.9	2.81171	up	2.91767e-07	1.21051e-05	yes
TRINITY_DN14972_c1_g1	378	TRINITY_DN14972_c1_g1_i1	-	-	-	-	-	-	-	-	-	-	0.77	21.75	-4.57238	down	2.9624e-07	1.22723e-05	yes
TRINITY_DN13948_c0_g1	464	TRINITY_DN13948_c0_g1_i1;TRINITY_DN13948_c0_g1_i2	chaperone protein dnaJ 11, chloroplastic [Medicago truncatula]	ATJ11	Chaperone protein dnaJ 11, chloroplastic OS=Arabidopsis thaliana GN=ATJ11 PE=1 SV=2	GO:0005634(nucleus);GO:0006457(protein folding);GO:0009507(chloroplast);GO:0009536(plastid);GO:0009570(chloroplast stroma)	COG2214(DNAj domain protein)	NA	NA	NA	NA(NA)	G7LC41.2 PF00226.29;DnaJ;	1.3	26.5	-4.15982	down	2.97834e-07	1.23199e-05	yes
TRINITY_DN18876_c1_g6	865	TRINITY_DN18876_c1_g6_i1	WEB family protein At1g75720 [Medicago truncatula]	At1g75720	WEB family protein At1g75720 OS=Arabidopsis thaliana GN=At1g75720 PE=2 SV=1	GO:0005829(cytosol);GO:0009903(chloroplast avoidance movement);GO:0009904(chloroplast accumulation movement)	ENOG410YQJI(NA)	-	-	-	-	-	0.65	11.28	-3.86883	down	2.98308e-07	1.23212e-05	yes
TRINITY_DN21516_c1_g1	433	TRINITY_DN21516_c1_g1_i1;TRINITY_DN21516_c1_g1_i10;TRINITY_DN21516_c1_g1_i11;TRINITY_DN21516_c1_g1_i12;TRINITY_DN21516_c1_g1_i13;TRINITY_DN21516_c1_g1_i14;TRINITY_DN21516_c1_g1_i15;TRINITY_DN21516_c1_g1_i16;TRINITY_DN21516_c1_g1_i17;TRINITY_DN21516_c1_g1_i18;TRINITY_DN21516_c1_g1_i19;TRINITY_DN21516_c1_g1_i2;TRINITY_DN21516_c1_g1_i20;TRINITY_DN21516_c1_g1_i21;TRINITY_DN21516_c1_g1_i22;TRINITY_DN2…	subtilisin-like protease-like protein, partial [Trifolium pratense]	Glyma18g48580	Subtilisin-like protease Glyma18g48580 OS=Glycine max GN=Glyma18g48580 PE=1 SV=3	GO:0004252(serine-type endopeptidase activity);GO:0005618(cell wall)	COG1404(peptidase (S8 and S53, subtilisin, kexin, sedolisin)	-	-	-	-	G7KU92.1 PF00082.20;Peptidase_S8;	17.12	139.65	-3.19124	down	3.00395e-07	1.2389e-05	yes
TRINITY_DN26117_c0_g1	2591	TRINITY_DN26117_c0_g1_i1;TRINITY_DN26117_c0_g1_i10;TRINITY_DN26117_c0_g1_i11;TRINITY_DN26117_c0_g1_i12;TRINITY_DN26117_c0_g1_i13;TRINITY_DN26117_c0_g1_i2;TRINITY_DN26117_c0_g1_i3;TRINITY_DN26117_c0_g1_i4;TRINITY_DN26117_c0_g1_i5;TRINITY_DN26117_c0_g1_i6;TRINITY_DN26117_c0_g1_i7;TRINITY_DN26117_c0_g1_i8;TRINITY_DN26117_c0_g1_i9	probable inactive purple acid phosphatase 27 [Medicago truncatula]	PAP27	Probable inactive purple acid phosphatase 27 OS=Arabidopsis thaliana GN=PAP27 PE=2 SV=1	GO:0003993(acid phosphatase activity);GO:0004722(protein serine/threonine phosphatase activity);GO:0005576(extracellular region);GO:0016311(dephosphorylation);GO:0046872(metal ion binding)	COG1409(Hydrolyzes cAMP to 5'-AMP. Plays an important regulatory role in modulating the intracellular concentration of cAMP, thereby influencing cAMP-dependent processes (By similarity))	-	-	-	-	G7JSI6.2 PF00149.26;Metallophos;	20.4	10.22	1.95433	up	3.06099e-07	1.26055e-05	yes
TRINITY_DN20358_c0_g2	2411	TRINITY_DN20358_c0_g2_i1;TRINITY_DN20358_c0_g2_i2;TRINITY_DN20358_c0_g2_i3;TRINITY_DN20358_c0_g2_i4;TRINITY_DN20358_c0_g2_i5;TRINITY_DN20358_c0_g2_i6	non-specific phospholipase C6 [Medicago truncatula]	NPC6	Non-specific phospholipase C6 OS=Arabidopsis thaliana GN=NPC6 PE=2 SV=1	GO:0003993(acid phosphatase activity);GO:0005576(extracellular region);GO:0005886(plasma membrane);GO:0009395(phospholipid catabolic process);GO:0016788(hydrolase activity, acting on ester bonds)	COG3511(phospholipase C)	K01114	phospholipase C	EC:3.1.4.3	mtr00562(Inositol phosphate metabolism);mtr00564(Glycerophospholipid metabolism);mtr00565(Ether lipid metabolism)	G7J3V5.1 PF04185.12;Phosphoesterase;	3.52	17.54	-2.10576	down	3.16003e-07	1.2994e-05	yes
TRINITY_DN16055_c2_g5	883	TRINITY_DN16055_c2_g5_i1;TRINITY_DN16055_c2_g5_i2;TRINITY_DN16055_c2_g5_i3	-	-	-	-	-	-	-	-	-	-	0.26	6.42	-4.5538	down	3.1743e-07	1.30334e-05	yes
TRINITY_DN16542_c1_g2	1923	TRINITY_DN16542_c1_g2_i1	protein DETOXIFICATION 51 [Medicago truncatula]	DTX51	Protein DETOXIFICATION 51 OS=Arabidopsis thaliana GN=DTX51 PE=2 SV=1	GO:0006855(drug transmembrane transport)	COG0534(Mate efflux family protein)	NA	NA	NA	NA(NA)	A0A072UDM4.1 PF01554.16;MatE;	0.19	3.38	-3.98276	down	3.29228e-07	1.34979e-05	yes
TRINITY_DN23754_c2_g1	2412	TRINITY_DN23754_c2_g1_i1;TRINITY_DN23754_c2_g1_i2;TRINITY_DN23754_c2_g1_i3;TRINITY_DN23754_c2_g1_i4;TRINITY_DN23754_c2_g1_i5	homeobox-leucine zipper protein ATHB-6 [Medicago truncatula]	ATHB-16	Homeobox-leucine zipper protein ATHB-16 OS=Arabidopsis thaliana GN=ATHB-16 PE=2 SV=2	GO:0003700(DNA binding transcription factor activity);GO:0005634(nucleus);GO:0006351(transcription, DNA-templated);GO:0006355(regulation of transcription, DNA-templated);GO:0009637(response to blue light);GO:0030308(negative regulation of cell growth);GO:0043565(sequence-specific DNA binding);GO:0045893(positive regulation of transcription, DNA-templated);GO:0048510(regulation of timing of transi…	ENOG410Z2UE(homeobox-leucine zipper protein)	NA	NA	NA	NA(NA)	A0A067EZW4.1 PF00046.27;Homeobox;	538.19	229.45	1.71812	up	3.33309e-07	1.3645e-05	yes
TRINITY_DN20306_c1_g5	482	TRINITY_DN20306_c1_g5_i1;TRINITY_DN20306_c1_g5_i2	unnamed protein product, partial [Brassica oleracea]	CAM-1	Calmodulin-1/11/16 OS=Daucus carota GN=CAM-1 PE=2 SV=2	GO:0005515(protein binding)	COG5126(Calcium-binding protein)	K02183	calmodulin	-	bna04016(MAPK signaling pathway - plant);bna04070(Phosphatidylinositol signaling system);bna04626(Plant-pathogen interaction)	M0TMY2.1 PF13499.4;EF-hand_7;	1556.85	557.33	1.66991	up	3.36315e-07	1.37478e-05	yes
TRINITY_DN24307_c0_g2	1989	TRINITY_DN24307_c0_g2_i1;TRINITY_DN24307_c0_g2_i2	cyclic dof factor 2 [Medicago truncatula]	CDF2	Cyclic dof factor 2 OS=Arabidopsis thaliana GN=CDF2 PE=1 SV=2	GO:0003677(DNA binding);GO:0003700(DNA binding transcription factor activity);GO:0005515(protein binding);GO:0005634(nucleus);GO:0006351(transcription, DNA-templated);GO:0006355(regulation of transcription, DNA-templated);GO:0009908(flower development);GO:0043565(sequence-specific DNA binding);GO:0046872(metal ion binding);GO:0048510(regulation of timing of transition from vegetative to reproduct…	ENOG410YN7N(zinc finger protein)	K16222	Dof zinc finger protein DOF5.5	-	csat04712(Circadian rhythm - plant)	C5WM75.1 PF02701.13;zf-Dof;	22.53	7.48	1.77692	up	3.43536e-07	1.40223e-05	yes
TRINITY_DN14741_c1_g1	1562	TRINITY_DN14741_c1_g1_i1;TRINITY_DN14741_c1_g1_i2;TRINITY_DN14741_c1_g1_i3	probable WRKY transcription factor 23 [Medicago truncatula]	WRKY23	Probable WRKY transcription factor 23 OS=Arabidopsis thaliana GN=WRKY23 PE=2 SV=1	GO:0003700(DNA binding transcription factor activity);GO:0005634(nucleus);GO:0006351(transcription, DNA-templated);GO:0006355(regulation of transcription, DNA-templated);GO:0009624(response to nematode);GO:0009733(response to auxin);GO:0043565(sequence-specific DNA binding)	ENOG410YRNP(Transcription factor)	NA	NA	NA	NA(NA)	A0A067HG94.1 PF03106.13;WRKY;	19	4.53	2.22547	up	3.44595e-07	1.40449e-05	yes
TRINITY_DN19320_c1_g1	1682	TRINITY_DN19320_c1_g1_i1;TRINITY_DN19320_c1_g1_i2;TRINITY_DN19320_c1_g1_i3;TRINITY_DN19320_c1_g1_i4;TRINITY_DN19320_c1_g1_i5;TRINITY_DN19320_c1_g1_i6;TRINITY_DN19320_c1_g1_i7	reticulon-like protein B21 [Medicago truncatula]	RTNLB21	Reticulon-like protein B21 OS=Arabidopsis thaliana GN=RTNLB21 PE=2 SV=2	GO:0012505(endomembrane system)	ENOG4111T8T(Reticulon)	NA	NA	NA	NA(NA)	A0A072V8B4.1 PF02453.15;Reticulon;	2.99	17.24	-2.45075	down	3.5096e-07	1.42834e-05	yes
TRINITY_DN13496_c0_g7	693	TRINITY_DN13496_c0_g7_i1;TRINITY_DN13496_c0_g7_i2;TRINITY_DN13496_c0_g7_i3	putative benzyl alcohol O-benzoyltransferase [Medicago truncatula]	HSR201	Benzyl alcohol O-benzoyltransferase OS=Nicotiana tabacum GN=HSR201 PE=1 SV=1	GO:0009821(alkaloid biosynthetic process);GO:0047203(13-hydroxylupinine O-tigloyltransferase activity)	-	NA	NA	NA	NA(NA)	G7L0T5.1 PF02458.13;Transferase;	62.32	10.35	3.30673	up	3.52048e-07	1.43067e-05	yes
TRINITY_DN12537_c0_g1	1388	TRINITY_DN12537_c0_g1_i1	plant intracellular Ras-group-related LRR protein 6 [Medicago truncatula]	PIRL6	Plant intracellular Ras-group-related LRR protein 6 OS=Arabidopsis thaliana GN=PIRL6 PE=2 SV=1	GO:0008150(biological_process)	COG4886(leucine Rich Repeat)	-	-	-	-	V7CCT4.1 PF13855.4;LRR_8;	3.46	0.04	6.37588	up	3.60354e-07	1.46228e-05	yes
TRINITY_DN17067_c0_g2	259	TRINITY_DN17067_c0_g2_i1	S-adenosylmethionine decarboxylase proenzyme [Medicago truncatula]	SAMDC	S-adenosylmethionine decarboxylase proenzyme OS=Ipomoea nil GN=SAMDC PE=3 SV=1	GO:0004014(adenosylmethionine decarboxylase activity);GO:0005829(cytosol);GO:0006597(spermine biosynthetic process);GO:0008295(spermidine biosynthetic process)	ENOG410XRN0(S-adenosylmethionine decarboxylase proenzyme)	K01611	S-adenosylmethionine decarboxylase	EC:4.1.1.50	mtr00270(Cysteine and methionine metabolism);mtr00330(Arginine and proline metabolism)	A0A072TXA3.1 PF01536.14;SAM_decarbox;	575.46	196.52	1.76443	up	3.64384e-07	1.47647e-05	yes
TRINITY_DN14758_c0_g1	807	TRINITY_DN14758_c0_g1_i1;TRINITY_DN14758_c0_g1_i2	C-repeat binding factor 5 [Medicago truncatula]	-	-	-	ENOG410YK37(dehydration-responsive element-binding protein)	NA	NA	NA	NA(NA)	-	22.31	3.06	3.07588	up	3.65831e-07	1.48018e-05	yes
TRINITY_DN17420_c0_g1	895	TRINITY_DN17420_c0_g1_i1;TRINITY_DN17420_c0_g1_i2;TRINITY_DN17420_c0_g1_i3;TRINITY_DN17420_c0_g1_i4	uncharacterized protein LOC11412566 [Medicago truncatula]	-	-	GO:0003674(molecular_function);GO:0005634(nucleus);GO:0009409(response to cold);GO:0010228(vegetative to reproductive phase transition of meristem);GO:0042752(regulation of circadian rhythm);GO:0080167(response to karrikin)	ENOG410YU7U(expressed protein)	-	-	-	-	-	0.09	4.68	-5.32358	down	3.69228e-07	1.49174e-05	yes
TRINITY_DN11603_c0_g1	617	TRINITY_DN11603_c0_g1_i1;TRINITY_DN11603_c0_g1_i2	hypothetical protein MTR_4g063885 [Medicago truncatula]	-	-	-	-	-	-	-	-	-	2.85	29.24	-3.13318	down	3.81785e-07	1.54024e-05	yes
TRINITY_DN25771_c0_g1	3267	TRINITY_DN25771_c0_g1_i1;TRINITY_DN25771_c0_g1_i2;TRINITY_DN25771_c0_g1_i3;TRINITY_DN25771_c0_g1_i4;TRINITY_DN25771_c0_g1_i5;TRINITY_DN25771_c0_g1_i6;TRINITY_DN25771_c0_g1_i7;TRINITY_DN25771_c0_g1_i8	two-component response regulator-like APRR7 [Medicago truncatula]	PRR37	Two-component response regulator-like PRR37 OS=Oryza sativa subsp. japonica GN=PRR37 PE=2 SV=1	GO:0000156(phosphorelay response regulator activity);GO:0000160(phosphorelay signal transduction system);GO:0003677(DNA binding);GO:0005634(nucleus);GO:0005739(mitochondrion);GO:0006351(transcription, DNA-templated);GO:0006355(regulation of transcription, DNA-templated);GO:0007623(circadian rhythm);GO:0009266(response to temperature stimulus);GO:0010017(red or far-red light signaling pathway);GO:…	COG5641(Transcription factor)	K12129	pseudo-response regulator 7	-	mtr04712(Circadian rhythm - plant)	K7LZK4.1 PF00072.22;Response_reg;	25.49	100.11	-1.76922	down	3.83892e-07	1.54649e-05	yes
TRINITY_DN26353_c1_g1	2708	TRINITY_DN26353_c1_g1_i1;TRINITY_DN26353_c1_g1_i10;TRINITY_DN26353_c1_g1_i11;TRINITY_DN26353_c1_g1_i2;TRINITY_DN26353_c1_g1_i3;TRINITY_DN26353_c1_g1_i4;TRINITY_DN26353_c1_g1_i5;TRINITY_DN26353_c1_g1_i6;TRINITY_DN26353_c1_g1_i7;TRINITY_DN26353_c1_g1_i8;TRINITY_DN26353_c1_g1_i9	uncharacterized protein LOC11414589 isoform X2 [Medicago truncatula]	-	-	GO:0003746(translation elongation factor activity);GO:0005634(nucleus);GO:0006414(translational elongation)	ENOG410YC5H(Domain of unknown function (DUF3475))	K12812	ATP-dependent RNA helicase UAP56/SUB2	EC:3.6.4.13	gra03040(Spliceosome);gra03013(RNA transport);gra03015(mRNA surveillance pathway)	G7I7P5.1 PF05003.10;DUF668;	29.76	5.88	2.43906	up	3.86612e-07	1.55519e-05	yes
TRINITY_DN21663_c0_g2	1183	TRINITY_DN21663_c0_g2_i1;TRINITY_DN21663_c0_g2_i2	probable carboxylesterase 12 [Medicago truncatula]	CXE12	Probable carboxylesterase 12 OS=Arabidopsis thaliana GN=CXE12 PE=1 SV=1	GO:0005634(nucleus);GO:0005737(cytoplasm);GO:0005829(cytosol);GO:0009056(catabolic process);GO:0052689(carboxylic ester hydrolase activity)	COG0657(alpha beta hydrolase fold-3 domain protein)	NA	NA	NA	NA(NA)	G7JMF3.1 PF07859.11;Abhydrolase_3;	0.87	9.38	-3.12576	down	3.92702e-07	1.5774e-05	yes
TRINITY_DN14862_c0_g3	1912	TRINITY_DN14862_c0_g3_i1;TRINITY_DN14862_c0_g3_i10;TRINITY_DN14862_c0_g3_i2;TRINITY_DN14862_c0_g3_i3;TRINITY_DN14862_c0_g3_i4;TRINITY_DN14862_c0_g3_i5;TRINITY_DN14862_c0_g3_i6;TRINITY_DN14862_c0_g3_i7;TRINITY_DN14862_c0_g3_i8;TRINITY_DN14862_c0_g3_i9	transmembrane protein 18 [Medicago truncatula]	TMEM18	Transmembrane protein 18 OS=Homo sapiens GN=TMEM18 PE=1 SV=2	GO:0003674(molecular_function);GO:0005575(cellular_component);GO:0008150(biological_process)	ENOG4111SUD(NA)	NA	NA	NA	NA(NA)	I3T390.1 PF14770.4;TMEM18;	71.2	22.89	1.61119	up	3.95223e-07	1.58364e-05	yes
TRINITY_DN11222_c0_g1	988	TRINITY_DN11222_c0_g1_i1;TRINITY_DN11222_c0_g1_i2	hypothetical protein MtrunA17_Chr3g0126211 [Medicago truncatula]	MKS1	Protein MKS1 OS=Arabidopsis thaliana GN=MKS1 PE=1 SV=2	GO:0005515(protein binding);GO:0005634(nucleus);GO:0006952(defense response);GO:0009870(defense response signaling pathway, resistance gene-dependent)	ENOG410YNID(VQ domain containing protein)	K20725	MAP kinase substrate 1	-	mtr04016(MAPK signaling pathway - plant)	-	17.06	3.06	2.66524	up	3.95397e-07	1.58364e-05	yes
TRINITY_DN19103_c1_g1	259	TRINITY_DN19103_c1_g1_i1	SAUR-like auxin-responsive family protein [Medicago truncatula]	ARG7	Indole-3-acetic acid-induced protein ARG7 OS=Vigna radiata var. radiata GN=ARG7 PE=2 SV=1	GO:0005887(integral component of plasma membrane);GO:0009705(plant-type vacuole membrane);GO:0009992(cellular water homeostasis);GO:0015250(water channel activity);GO:0015254(glycerol channel activity);GO:0034220(ion transmembrane transport);GO:0042807(central vacuole)	ENOG410Z28U(auxin-induced protein)	K14488	SAUR family protein	-	mtr04075(Plant hormone signal transduction)	G7JAR0.1 PF02519.12;Auxin_inducible;	50.16	3.56	4.08345	up	4.04164e-07	1.61643e-05	yes
TRINITY_DN18781_c1_g2	1348	TRINITY_DN18781_c1_g2_i1;TRINITY_DN18781_c1_g2_i2;TRINITY_DN18781_c1_g2_i3;TRINITY_DN18781_c1_g2_i4;TRINITY_DN18781_c1_g2_i5;TRINITY_DN18781_c1_g2_i6;TRINITY_DN18781_c1_g2_i7	transcription factor MYB44 [Medicago truncatula]	MYB44	Transcription factor MYB44 OS=Arabidopsis thaliana GN=MYB44 PE=2 SV=1	GO:0000981(RNA polymerase II transcription factor activity, sequence-specific DNA binding);GO:0001135(transcription factor activity, RNA polymerase II transcription factor recruiting);GO:0003677(DNA binding);GO:0003700(DNA binding transcription factor activity);GO:0005515(protein binding);GO:0005634(nucleus);GO:0006351(transcription, DNA-templated);GO:0006355(regulation of transcription, DNA-temp…	COG5147(Myblike DNAbinding domain containing protein)	NA	NA	NA	NA(NA)	A0A0A0LKY3.1 PF13921.4;Myb_DNA-bind_6;	91.32	31.65	1.69279	up	4.15706e-07	1.66019e-05	yes
[truncated: 2,370 more rows]

## Sheet: DS vs. RW
Gene_ID	Length	Trans_ID	Annotation	Name	swissprot_description	GO_Term	NOG	KOEntry	KODescription	EC	KEGG_Pathway	Pfam_description	DS_mean_TPM	RW_mean_TPM	log2FC	regulation	pvalue	FDR	significant
[truncated: 2,508 more rows]

## Sheet: RW vs. CK
Gene_ID	Length	Trans_ID	Annotation	Name	swissprot_description	GO_Term	NOG	KOEntry	KODescription	EC	KEGG_Pathway	Pfam_description	RW_mean_TPM	CK_mean_TPM	log2FC	regulation	pvalue	FDR	significant
[truncated: 205 more rows]
