# Supplementary material for: Utilization of Transcriptome, Small RNA, and Degradome Sequencing to Provide Insights Into Drought Stress and Rewatering Treatment in Medicago ruthenica
Source: Front Plant Sci. 2021 Aug 3;12:675903. doi: 10.3389/fpls.2021.675903 (PMC8369265; doi:10.3389/fpls.2021.675903)
Supplement: Supplementary file 4 [file Table_4.XLSX]

## Sheet: sheet1
Gene_ID	Length	Annotation	Name	CK_mean_TPM	DS_mean_TPM	RW_mean_TPM	pvalue	FDR	significant
TRINITY_DN21990_c1_g1	1560	mitochondrial uncoupling protein 5 [Medicago truncatula]	PUMP5	167.68	1695.52	227.6	2.53429e-18	4.10822e-16	yes
TRINITY_DN20306_c1_g5	482	unnamed protein product, partial [Brassica oleracea]	CAM-1	557.33	1556.85	490.41	1.02814e-06	3.14236e-05	yes
TRINITY_DN16559_c0_g6	475	jasmonate zim-domain protein [Medicago truncatula]	TIFY10A	80.23	1149.99	51.87	2.19407e-42	1.49712e-39	yes
TRINITY_DN19618_c0_g2	1542	putative xyloglucan:xyloglucosyl transferase, Xyloglucan-specific endo-beta-1,4-glucanase [Medicago truncatula]	XTH6	377.3	648.8	157.92	2.07435e-06	5.88623e-05	yes
TRINITY_DN24927_c0_g2	500	heat shock protein 70 [Medicago sativa]	MED37E	236.37	626.64	167.47	2.69237e-08	1.18971e-06	yes
TRINITY_DN22281_c0_g1	1984	probable WRKY transcription factor 41 [Medicago truncatula]	WRKY53	8.06	368.29	19.67	1.25225e-40	7.49844e-38	yes
TRINITY_DN21723_c1_g3	1088	calvin cycle protein CP12-2, chloroplastic [Medicago truncatula]	CP12-2	653.71	218.86	520.02	0.000290051	0.00409547	yes
TRINITY_DN22246_c0_g1	2315	ferritin [Medicago truncatula]	PFE2	580.11	147.9	988.98	2.5756e-07	9.03412e-06	yes
TRINITY_DN25755_c0_g1	2023	rubisco accumulation factor 1.1, chloroplastic [Medicago truncatula]	RAF1.1	182.94	62.22	133.39	5.88078e-06	0.000148748	yes
TRINITY_DN25759_c1_g1	1717	3-oxo-Delta(4,5)-steroid 5-beta-reductase [Medicago truncatula]	VEP1	54.25	214.22	64.54	2.08611e-11	1.50389e-09	yes
