# Supplementary material for: Utilization of Transcriptome, Small RNA, and Degradome Sequencing to Provide Insights Into Drought Stress and Rewatering Treatment in Medicago ruthenica
Source: Front Plant Sci. 2021 Aug 3;12:675903. doi: 10.3389/fpls.2021.675903 (PMC8369265; doi:10.3389/fpls.2021.675903)
Supplement: Supplementary file 5 [file Table_5.XLSX]

## Sheet: Sheet1
		CK				DS				RW
lib	type	Total	% of Total	uniq	% of uniq	Total	% of Total	uniq	% of uniq	Total	% of Total	uniq	% of uniq
Raw reads		16112539	100	4.02915e+06	100	1.35206e+07	100	2.6022e+06	100	1.74594e+07	100	3.31408e+06	100
3ADT&length filter	Sequence type	3.09554e+06	19.212	568433	14.108	6.78281e+06	50.1665	902622	34.6868	5.80797e+06	33.2655	811988	24.5012
Junk reads	Sequence type	49523.7	0.307361	24035.3	0.596536	27056.7	0.200114	12179.7	0.468052	46080.3	0.263928	18032.7	0.544123
Rfam	RNA class	701498	4.35374	13935.3	0.345863	534382	3.95236	11353	0.436284	924449	5.29484	15406.3	0.464875
Repeats	RNA class	11294.3	0.0700965	193.667	0.00480664	14151.3	0.104665	162	0.00622549	20218	0.1158	218.333	0.00658806
valid reads	Sequence type	12257093	76.0718	3.42262e+06	84.9465	6.16355e+06	45.5863	1.67594e+06	64.4046	1.06635e+07	61.076	2.46851e+06	74.4857
rRNA	RNA class	585355	3.63292	10720.3	0.266069	440841	3.26051	8908.67	0.342351	755755	4.32863	11913	0.359466
tRNA	RNA class	63629	0.394904	1112.33	0.0276071	52520.3	0.388447	929.333	0.0357133	95189	0.545201	1459.67	0.0440444
snoRNA	RNA class	7408.67	0.0459808	281.667	0.00699072	7589	0.0561292	254	0.00976096	9830.33	0.0563038	348	0.0105007
snRNA	RNA class	8877.33	0.0550958	519.333	0.0128894	5206.33	0.0385067	254.333	0.00977376	10934	0.0626251	387.667	0.0116976
other Rfam RNA	RNA class	36227.7	0.224841	1301.67	0.0323062	28225.7	0.20876	1006.67	0.0386852	52740.7	0.302075	1298	0.0391662
