# Supplementary material for: Utilization of Transcriptome, Small RNA, and Degradome Sequencing to Provide Insights Into Drought Stress and Rewatering Treatment in Medicago ruthenica
Source: Front Plant Sci. 2021 Aug 3;12:675903. doi: 10.3389/fpls.2021.675903 (PMC8369265; doi:10.3389/fpls.2021.675903)
Supplement: Supplementary file 7 [file Table_7.XLSX]

## Sheet: Sheet1
Sample	CK(number)	CK(ratio)	DS(number)	DS(ratio)	RW(number)	RW(ratio)
Raw Reads	21183955	/	20115328	/	18418244	/
Unique Raw Reads	4574314	/	5745686	/	6473097	/
reads < 15nt after removing 3 adaptor	128870	0.61%	204063	1.01%	175959	0.96%
Mappable Reads	21055085	99.39%	19911265	98.99%	18242285	99.04%
Unique reads < 15nt after removing 3 adaptor	41559	0.91%	54492	0.95%	58711	0.91%
Unique Mappable Reads	4532755	99.09%	5691194	99.05%	6414386	99.09%
Mapped Reads	18279670	86.29%	16620613	82.63%	14184792	77.01%
Unique Mapped Reads	3352045	73.28%	4295738	74.76%	4516291	69.77%
Number of input Transcript	52457	/	52457	/	52457	/
Number of Coverd Transcript	33971	64.76%	34304	65.39%	37758	71.98%
