# Supplementary material for: Utilization of Transcriptome, Small RNA, and Degradome Sequencing to Provide Insights Into Drought Stress and Rewatering Treatment in Medicago ruthenica
Source: Front Plant Sci. 2021 Aug 3;12:675903. doi: 10.3389/fpls.2021.675903 (PMC8369265; doi:10.3389/fpls.2021.675903)
Supplement: Supplementary file 8 [file Table_8.XLSX]

## Sheet: Sheet1
Query	Transcript	Transcript Annotation	Symbol	GO	KEGG	TSlice	AllenScore	DegradomeCategory(CK)	DegradomeCategory(DS)	DegradomeCategory(RW)	DegradomeNormReads(CK)	DegradomeNormReads(DS)	DegradomeNormReads(RW)	pvalue	qvalue	significant
PC-3p-102950_40	TRINITY_DN14517_c0_g5	putative isoflavone-7-O-beta-glucoside 6''-O-malonyltransferase [Medicago truncatula]	PMAT1	GO:0016420(malonyltransferase activity)	ko00944(Flavone and flavonol biosynthesis);ko00943(Isoflavonoid biosynthesis)	76	5.5	NA	4	NA	0	30.5633	0	5.326e-14	6.30988e-14	yes
PC-3p-102950_40	TRINITY_DN14964_c1_g1	replication factor C subunit 1 isoform X1 [Medicago truncatula]	RFC1	GO:0003677(DNA binding);GO:0005634(nucleus)	ko03030(DNA replication);ko03420(Nucleotide excision repair);ko03430(Mismatch repair)	1593	8	NA	4	NA	0	30.5633	0	5.326e-14	6.30988e-14	yes
PC-3p-102950_40	TRINITY_DN16951_c0_g2	tRNA-dihydrouridine synthase-like protein [Medicago truncatula]	DUS1L	GO:0005829(cytosol);GO:0017150(tRNA dihydrouridine synthase activity)	NA	1655	20.5	NA	NA	4	0	0	33.7644	2.1684e-15	3.13149e-15	yes
PC-3p-102950_40	TRINITY_DN18634_c0_g5	DNA gyrase subunit B, chloroplastic/mitochondrial [Medicago truncatula]	GYRB	GO:0003918(DNA topoisomerase type II (ATP-hydrolyzing) activity);GO:0006265(DNA topological change);GO:0006268(DNA unwinding involved in DNA replication);GO:0007059(chromosome segregation);GO:0009295(nucleoid);GO:0009330(DNA topoisomerase complex (ATP-hydrolyzing))	NA	2291	9.5	NA	4	NA	0	30.5633	0	5.326e-14	6.30988e-14	yes
PC-3p-102950_40	TRINITY_DN19559_c0_g1	cytochrome P450 94B3 [Medicago truncatula]	CYP94A1	GO:0004497(monooxygenase activity);GO:0005506(iron ion binding);GO:0009507(chloroplast);GO:0016705(oxidoreductase activity, acting on paired donors, with incorporation or reduction of molecular oxygen);GO:0019825(oxygen binding);GO:0020037(heme binding);GO:0055114(oxidation-reduction process)	ko00073(Cutin, suberine and wax biosynthesis)	1627	9.5	NA	2	NA	0	61.1266	0	2.8349e-27	7.6679e-27	yes
PC-3p-102950_40	TRINITY_DN19590_c1_g1	putative heme peroxidase [Medicago truncatula]	DOX2	GO:0001561(fatty acid alpha-oxidation);GO:0004601(peroxidase activity);GO:0005576(extracellular region);GO:0006629(lipid metabolic process);GO:0006979(response to oxidative stress);GO:0008219(cell death);GO:0009626(plant-type hypersensitive response);GO:0009627(systemic acquired resistance);GO:0009737(response to abscisic acid);GO:0009751(response to salicylic acid);GO:0012511(monolayer-surrounde…	ko00592(alpha-Linolenic acid metabolism)	1077	5.5	4	NA	4	40.3388	0	33.7644	5.8097e-09	6.43576e-09	yes
PC-3p-102950_40	TRINITY_DN20377_c0_g1	alpha,alpha-trehalose-phosphate synthase [UDP-forming] 6 [Medicago truncatula]	TPS6	GO:0003825(alpha,alpha-trehalose-phosphate synthase (UDP-forming) activity);GO:0004805(trehalose-phosphatase activity);GO:0005737(cytoplasm);GO:0005739(mitochondrion);GO:0005992(trehalose biosynthetic process);GO:0016757(transferase activity, transferring glycosyl groups);GO:0070413(trehalose metabolism in response to stress)	ko00500(Starch and sucrose metabolism)	1693	6.5	NA	NA	4	0	0	33.7644	2.1684e-15	3.13149e-15	yes
PC-3p-102950_40	TRINITY_DN21307_c0_g2	protein GAMETE EXPRESSED 1 [Medicago truncatula]	GEX1	GO:0005886(plasma membrane);GO:0005887(integral component of plasma membrane);GO:0009507(chloroplast);GO:0009553(embryo sac development);GO:0009555(pollen development);GO:0009793(embryo development ending in seed dormancy);GO:0016021(integral component of membrane);GO:0042802(identical protein binding)	NA	1826	10.5	4	NA	NA	40.3388	0	0	3.0257e-18	5.71521e-18	yes
PC-3p-102950_40	TRINITY_DN21501_c0_g2	uncharacterized protein LOC25489797 isoform X1 [Medicago truncatula]	-	GO:0016787(hydrolase activity)	NA	1246	15.5	NA	NA	2	0	0	67.5288	4.6985e-30	1.53517e-29	yes
PC-3p-102950_40	TRINITY_DN23004_c0_g1	peroxisomal membrane protein 11C [Medicago truncatula]	PEX11C	GO:0005778(peroxisomal membrane);GO:0016559(peroxisome fission);GO:0044375(regulation of peroxisome size)	ko04146(Peroxisome)	2697	6.5	NA	NA	4	0	0	33.7644	2.1684e-15	3.13149e-15	yes
PC-3p-102950_40	TRINITY_DN24268_c1_g1	ATP-dependent zinc metalloprotease FTSH 11, chloroplastic/mitochondrial [Medicago truncatula]	FTSH11	GO:0004176(ATP-dependent peptidase activity);GO:0005739(mitochondrion);GO:0006508(proteolysis);GO:0008237(metallopeptidase activity);GO:0009941(chloroplast envelope);GO:0010304(PSII associated light-harvesting complex II catabolic process)	NA	2298	21	4	NA	NA	40.3388	0	0	3.0257e-18	5.71521e-18	yes
PC-3p-102950_40	TRINITY_DN24336_c0_g1	flavonoid 3'-monooxygenase [Medicago truncatula]	CYP75B2	GO:0016020(membrane);GO:0016709(oxidoreductase activity, acting on paired donors, with incorporation or reduction of molecular oxygen, NAD(P)H as one donor, and incorporation of one atom of oxygen);GO:0044550(secondary metabolite biosynthetic process)	ko00941(Flavonoid biosynthesis);ko00944(Flavone and flavonol biosynthesis)	402	9.5	4	NA	NA	40.3388	0	0	3.0257e-18	5.71521e-18	yes
PC-3p-102950_40	TRINITY_DN24874_c0_g1	shrunken seed protein, putative [Medicago truncatula]	PEX16	GO:0005778(peroxisomal membrane);GO:0007031(peroxisome organization)	ko04146(Peroxisome)	773	9.5	NA	NA	4	0	0	33.7644	2.1684e-15	3.13149e-15	yes
PC-3p-102950_40	TRINITY_DN25580_c0_g1	translation initiation factor eIF-2B subunit epsilon isoform X1 [Medicago truncatula]	Eif2b5	GO:0003743(translation initiation factor activity);GO:0005737(cytoplasm);GO:0005829(cytosol);GO:0006413(translational initiation);GO:0006446(regulation of translational initiation);GO:0016779(nucleotidyltransferase activity)	ko03013(RNA transport)	474	10	4	NA	NA	40.3388	0	0	3.0257e-18	5.71521e-18	yes
PC-3p-102950_40	TRINITY_DN25704_c0_g1	squamosa promoter-binding-like protein 1 [Medicago truncatula]	SPL1	GO:0003677(DNA binding);GO:0003700(DNA binding transcription factor activity);GO:0005634(nucleus);GO:0006351(transcription, DNA-templated);GO:0006355(regulation of transcription, DNA-templated);GO:0016021(integral component of membrane);GO:0046872(metal ion binding)	NA	1165	6.5	4	NA	NA	40.3388	0	0	3.0257e-18	5.71521e-18	yes
PC-3p-102950_40	TRINITY_DN25770_c0_g1	PREDICTED: glutamate decarboxylase-like [Lupinus angustifolius]	GAD2	GO:0004351(glutamate decarboxylase activity);GO:0005516(calmodulin binding);GO:0006536(glutamate metabolic process);GO:0006807(nitrogen compound metabolic process);GO:0030170(pyridoxal phosphate binding)	ko00650(Butanoate metabolism);ko00250(Alanine, aspartate and glutamate metabolism);ko00410(beta-Alanine metabolism);ko00430(Taurine and hypotaurine metabolism)	42	6.5	4	4	NA	40.3388	30.5633	0	7.2896e-09	7.93241e-09	yes
PC-3p-102950_40	TRINITY_DN26173_c1_g1	uncharacterized protein LOC11423541 isoform X1 [Medicago truncatula]	-	GO:0005634(nucleus);GO:0008150(biological_process)	NA	3650	8	NA	4	2	0	30.5633	67.5288	6.4851e-16	1.17172e-15	yes
PC-3p-102950_40	TRINITY_DN26218_c1_g1	elongation factor G-2, chloroplastic [Medicago truncatula]	fusA2	GO:0003746(translation elongation factor activity);GO:0003924(GTPase activity);GO:0005622(intracellular);GO:0032790(ribosome disassembly)	NA	652	7.5	2	3	4	161.355	61.1266	33.7644	1.1353e-23	2.9039e-23	yes
PC-3p-106541_38	TRINITY_DN13902_c0_g1	3'-N-debenzoyl-2'-deoxytaxol N-benzoyltransferase [Medicago truncatula]	SCT	GO:0005737(cytoplasm);GO:0016740(transferase activity);GO:0016747(transferase activity, transferring acyl groups other than amino-acyl groups)	NA	634	16.5	2	NA	NA	80.6777	0	0	9.1449e-36	4.07513e-35	yes
PC-3p-106541_38	TRINITY_DN15567_c0_g2	protein FLOWERING LOCUS D [Medicago truncatula]	FLD	GO:0003677(DNA binding);GO:0005739(mitochondrion);GO:0006351(transcription, DNA-templated);GO:0006355(regulation of transcription, DNA-templated);GO:0008131(primary amine oxidase activity);GO:0009911(positive regulation of flower development);GO:0010228(vegetative to reproductive phase transition of meristem);GO:0016491(oxidoreductase activity);GO:0016575(histone deacetylation);GO:0055114(oxidati…	NA	603	12.5	4	NA	NA	40.3388	0	0	3.0257e-18	5.71521e-18	yes
PC-3p-106541_38	TRINITY_DN19688_c0_g2	acetolactate synthase [Medicago littoralis]	-	GO:0000287(magnesium ion binding);GO:0003984(acetolactate synthase activity);GO:0004737(pyruvate decarboxylase activity);GO:0005515(protein binding);GO:0009082(branched-chain amino acid biosynthetic process);GO:0009097(isoleucine biosynthetic process);GO:0009099(valine biosynthetic process);GO:0009507(chloroplast);GO:0009570(chloroplast stroma);GO:0009635(response to herbicide);GO:0030976(thiamin…	ko00650(Butanoate metabolism);ko00660(ko5-Branched dibasic acid metabolism);ko00290(Valine, leucine and isoleucine biosynthesis);ko00770(Pantothenate and CoA biosynthesis)	998	7.5	NA	2	NA	0	183.38	0	2.2612e-80	5.85342e-79	yes
PC-3p-106541_38	TRINITY_DN19846_c0_g1	scopoletin glucosyltransferase [Medicago truncatula]	TOGT1	GO:0009813(flavonoid biosynthetic process);GO:0043231(intracellular membrane-bounded organelle);GO:0052696(flavonoid glucuronidation);GO:0080043(quercetin 3-O-glucosyltransferase activity);GO:0080044(quercetin 7-O-glucosyltransferase activity)	ko00040(Pentose and glucuronate interconversions);ko00053(Ascorbate and aldarate metabolism);ko00860(Porphyrin and chlorophyll metabolism)	881	7.5	2	2	3	161.355	213.943	101.293	2.0563e-09	2.32908e-09	yes
PC-3p-106541_38	TRINITY_DN20238_c0_g4	phosphoenolpyruvate carboxykinase (ATP) [Medicago truncatula]	PCKA	GO:0004612(phosphoenolpyruvate carboxykinase (ATP) activity);GO:0005829(cytosol);GO:0006094(gluconeogenesis)	ko00010(Glycolysis / Gluconeogenesis);ko00020(Citrate cycle (TCA cycle));ko00620(Pyruvate metabolism);ko00710(Carbon fixation in photosynthetic organisms)	1560	12	NA	4	NA	0	30.5633	0	5.326e-14	6.30988e-14	yes
PC-3p-106541_38	TRINITY_DN20550_c1_g1	tubulin alpha-3 chain [Cicer arietinum]	TUBA3	GO:0005200(structural constituent of cytoskeleton);GO:0005618(cell wall);GO:0005737(cytoplasm);GO:0005829(cytosol);GO:0005886(plasma membrane);GO:0009506(plasmodesma);GO:0045298(tubulin complex);GO:0048046(apoplast);GO:0071258(cellular response to gravity)	ko04145(Phagosome)	787	5	3	3	NA	121.017	91.6898	0	3.8632e-25	1.00369e-24	yes
PC-3p-106541_38	TRINITY_DN20716_c0_g2	hypothetical protein TSUD_75970 [Trifolium subterraneum]	At5g39865	GO:0005634(nucleus);GO:0005884(actin filament);GO:0009055(electron transfer activity);GO:0009902(chloroplast relocation);GO:0015035(protein disulfide oxidoreductase activity);GO:0045454(cell redox homeostasis);GO:0051017(actin filament bundle assembly)	NA	572	7.5	3	3	3	121.017	366.759	236.351	6.2434e-28	1.9925e-27	yes
PC-3p-106541_38	TRINITY_DN20827_c1_g3	heavy metal-associated isoprenylated plant protein 35 [Medicago truncatula]	HIPP36	GO:0005737(cytoplasm);GO:0030001(metal ion transport);GO:0046914(transition metal ion binding);GO:0046916(cellular transition metal ion homeostasis)	NA	438	10	4	NA	3	40.3388	0	67.5288	1.1364e-14	1.60392e-14	yes
PC-3p-106541_38	TRINITY_DN20883_c0_g1	membrane-anchored ubiquitin-fold protein 3 [Medicago truncatula]	MUB3	GO:0005737(cytoplasm);GO:0030001(metal ion transport);GO:0046914(transition metal ion binding);GO:0046916(cellular transition metal ion homeostasis)	NA	619	7.5	NA	NA	4	0	0	33.7644	2.1684e-15	3.13149e-15	yes
PC-3p-106541_38	TRINITY_DN21286_c0_g1	uncharacterized protein LOC25496369 [Medicago truncatula]	At1g76660	GO:0003674(molecular_function);GO:0005634(nucleus);GO:0008150(biological_process)	NA	1177	15.5	NA	4	NA	0	30.5633	0	5.326e-14	6.30988e-14	yes
PC-3p-106541_38	TRINITY_DN21917_c0_g1	pheophytinase, chloroplastic [Medicago truncatula]	PPH	GO:0016787(hydrolase activity)	NA	1134	10	NA	NA	2	0	0	67.5288	4.6985e-30	1.53517e-29	yes
PC-3p-106541_38	TRINITY_DN22269_c0_g1	putative peptidase M1, membrane alanine aminopeptidase [Medicago truncatula]	TAF2	GO:0003682(chromatin binding);GO:0005669(transcription factor TFIID complex);GO:0043565(sequence-specific DNA binding);GO:0044212(transcription regulatory region DNA binding);GO:0045944(positive regulation of transcription by RNA polymerase II)	ko03022(Basal transcription factors)	85	9.5	4	NA	NA	40.3388	0	0	3.0257e-18	5.71521e-18	yes
PC-3p-106541_38	TRINITY_DN22998_c0_g3	UDP-glucose flavonoid 3-O-glucosyltransferase 7 [Medicago truncatula]	UGT73C2	GO:0009813(flavonoid biosynthetic process);GO:0043231(intracellular membrane-bounded organelle);GO:0052696(flavonoid glucuronidation);GO:0080043(quercetin 3-O-glucosyltransferase activity);GO:0080044(quercetin 7-O-glucosyltransferase activity)	ko00040(Pentose and glucuronate interconversions);ko00053(Ascorbate and aldarate metabolism);ko00860(Porphyrin and chlorophyll metabolism)	68	10.5	NA	4	NA	0	30.5633	0	5.326e-14	6.30988e-14	yes
PC-3p-106541_38	TRINITY_DN22998_c0_g4	putative UDP-glucuronosyl/UDP-glucosyltransferase [Medicago truncatula]	TOGT1	GO:0009813(flavonoid biosynthetic process);GO:0043231(intracellular membrane-bounded organelle);GO:0052696(flavonoid glucuronidation);GO:0080043(quercetin 3-O-glucosyltransferase activity);GO:0080044(quercetin 7-O-glucosyltransferase activity)	ko00040(Pentose and glucuronate interconversions);ko00053(Ascorbate and aldarate metabolism);ko00860(Porphyrin and chlorophyll metabolism)	404	10.5	4	4	4	40.3388	30.5633	33.7644	0.49068	0.491154	yes
PC-3p-106541_38	TRINITY_DN23552_c1_g1	hypothetical protein MTR_3g466590 [Medicago truncatula]	-	GO:0005634(nucleus)	NA	841	5.5	NA	NA	3	0	0	67.5288	4.6985e-30	1.53517e-29	yes
PC-3p-106541_38	TRINITY_DN23627_c0_g1	DNA ligase 4 [Medicago truncatula]	LIG4	GO:0003910(DNA ligase (ATP) activity);GO:0005737(cytoplasm);GO:0006273(lagging strand elongation);GO:0051103(DNA ligation involved in DNA repair)	ko03450(Non-homologous end-joining)	1043	10	4	NA	NA	40.3388	0	0	3.0257e-18	5.71521e-18	yes
PC-3p-106541_38	TRINITY_DN25460_c0_g1	F-box/kelch-repeat protein At1g23390 [Medicago truncatula]	-	GO:0004842(ubiquitin-protein transferase activity);GO:0019005(SCF ubiquitin ligase complex);GO:0031146(SCF-dependent proteasomal ubiquitin-dependent protein catabolic process)	NA	1136	7	3	2	3	80.6777	213.943	168.822	1.2089e-13	1.43073e-13	yes
PC-3p-10861_575	TRINITY_DN12960_c0_g2	-	-	NA	NA	158	8	NA	NA	2	0	0	67.5288	4.6985e-30	1.53517e-29	yes
PC-3p-10861_575	TRINITY_DN13034_c0_g1	hypothetical protein TSUD_405150 [Trifolium subterraneum]	NIP7-1	GO:0005887(integral component of plasma membrane);GO:0009992(cellular water homeostasis);GO:0015250(water channel activity);GO:0015254(glycerol channel activity);GO:0034220(ion transmembrane transport)	NA	568	15.5	NA	4	NA	0	30.5633	0	5.326e-14	6.30988e-14	yes
PC-3p-10861_575	TRINITY_DN14038_c2_g2	probable mannitol dehydrogenase [Medicago truncatula]	CAD	GO:0005737(cytoplasm);GO:0008270(zinc ion binding);GO:0009617(response to bacterium);GO:0009626(plant-type hypersensitive response);GO:0009809(lignin biosynthetic process);GO:0045551(cinnamyl-alcohol dehydrogenase activity);GO:0046029(mannitol dehydrogenase activity);GO:0047681(aryl-alcohol dehydrogenase (NADP+) activity);GO:0052747(sinapyl alcohol dehydrogenase activity);GO:0055114(oxidation-red…	ko00940(Phenylpropanoid biosynthesis)	554	14	4	3	NA	40.3388	61.1266	0	3.9437e-13	4.56816e-13	yes
PC-3p-10861_575	TRINITY_DN14105_c0_g1	-	-	NA	NA	147	7	NA	0	NA	0	61.1266	0	2.8349e-27	7.6679e-27	yes
PC-3p-10861_575	TRINITY_DN14235_c1_g1	phytochrome-associated serine/threonine-protein phosphatase [Medicago truncatula]	FYPP	GO:0004721(phosphoprotein phosphatase activity);GO:0004722(protein serine/threonine phosphatase activity);GO:0005515(protein binding);GO:0005737(cytoplasm);GO:0046872(metal ion binding)	NA	532	11	2	4	NA	80.6777	30.5633	0	3.6961e-20	8.81092e-20	yes
PC-3p-10861_575	TRINITY_DN14389_c0_g4	ethylene-responsive transcription factor ERF026 [Medicago truncatula]	ERF026	GO:0003677(DNA binding);GO:0003700(DNA binding transcription factor activity);GO:0005634(nucleus);GO:0006351(transcription, DNA-templated);GO:0006355(regulation of transcription, DNA-templated);GO:0009873(ethylene-activated signaling pathway);GO:0019760(glucosinolate metabolic process);GO:0043565(sequence-specific DNA binding);GO:0044212(transcription regulatory region DNA binding);GO:0045893(pos…	NA	669	8	NA	4	NA	0	30.5633	0	5.326e-14	6.30988e-14	yes
PC-3p-10861_575	TRINITY_DN14999_c0_g1	U-box domain-containing protein 16 [Medicago truncatula]	PUB16	GO:0005634(nucleus);GO:0005737(cytoplasm)	NA	2048	12	NA	3	NA	0	61.1266	0	2.8349e-27	7.6679e-27	yes
PC-3p-10861_575	TRINITY_DN15778_c1_g4	uncharacterized protein DDB_G0271670 [Medicago truncatula]	-	NA	NA	852	9.5	NA	NA	2	0	0	67.5288	4.6985e-30	1.53517e-29	yes
PC-3p-10861_575	TRINITY_DN16597_c0_g3	elongation factor 2 [Medicago truncatula]	LOS1	GO:0003924(GTPase activity);GO:0005622(intracellular);GO:0006412(translation)	NA	128	7.5	NA	4	4	0	30.5633	33.7644	9.1976e-08	9.66516e-08	yes
PC-3p-10861_575	TRINITY_DN19260_c0_g4	centromere-associated protein E [Medicago truncatula]	-	GO:0004526(ribonuclease P activity);GO:0005655(nucleolar ribonuclease P complex);GO:0090502(RNA phosphodiester bond hydrolysis, endonucleolytic)	NA	2645	8.5	2	NA	NA	80.6777	0	0	9.1449e-36	4.07513e-35	yes
PC-3p-10861_575	TRINITY_DN19999_c0_g1	uncharacterized protein LOC25489781 [Medicago truncatula]	dnajb14	GO:0005737(cytoplasm);GO:0006457(protein folding)	NA	1894	8.5	NA	NA	4	0	0	33.7644	2.1684e-15	3.13149e-15	yes
PC-3p-10861_575	TRINITY_DN20147_c0_g1	RecName: Full=Probable mannitol dehydrogenase; AltName: Full=NAD-dependent mannitol dehydrogenase	CAD1	GO:0005737(cytoplasm);GO:0008270(zinc ion binding);GO:0009735(response to cytokinin);GO:0009809(lignin biosynthetic process);GO:0045551(cinnamyl-alcohol dehydrogenase activity);GO:0048046(apoplast);GO:0052747(sinapyl alcohol dehydrogenase activity);GO:0055114(oxidation-reduction process)	ko00940(Phenylpropanoid biosynthesis)	794	13.5	NA	4	NA	0	30.5633	0	5.326e-14	6.30988e-14	yes
PC-3p-10861_575	TRINITY_DN21267_c0_g1	uncharacterized protein LOC25498498 [Medicago truncatula]	-	GO:0016787(hydrolase activity)	NA	1415	9.5	NA	4	NA	0	30.5633	0	5.326e-14	6.30988e-14	yes
PC-3p-10861_575	TRINITY_DN21937_c0_g1	uncharacterized protein LOC25485142 isoform X1 [Medicago truncatula]	-	GO:0009507(chloroplast)	ko00220(Arginine biosynthesis)	475	10.5	NA	2	NA	0	61.1266	0	2.8349e-27	7.6679e-27	yes
PC-3p-10861_575	TRINITY_DN22030_c0_g4	AT-hook motif nuclear-localized protein 9 [Medicago truncatula]	AHL11	GO:0003677(DNA binding);GO:0005634(nucleus);GO:0006351(transcription, DNA-templated);GO:0006355(regulation of transcription, DNA-templated)	NA	481	5.5	4	NA	NA	40.3388	0	0	3.0257e-18	5.71521e-18	yes
PC-3p-10861_575	TRINITY_DN22739_c0_g1	uncharacterized protein LOC25495944 isoform X1 [Medicago truncatula]	polA	GO:0003887(DNA-directed DNA polymerase activity);GO:0005737(cytoplasm);GO:0006261(DNA-dependent DNA replication);GO:0008409(5'-3' exonuclease activity)	ko00230(Purine metabolism);ko00240(Pyrimidine metabolism);ko03030(DNA replication);ko03410(Base excision repair);ko03420(Nucleotide excision repair);ko03440(Homologous recombination)	685	11.5	NA	2	NA	0	61.1266	0	2.8349e-27	7.6679e-27	yes
PC-3p-10861_575	TRINITY_DN23086_c0_g1	beta-amylase [Medicago truncatula]	BMY1	GO:0000272(polysaccharide catabolic process);GO:0005737(cytoplasm);GO:0005829(cytosol);GO:0005983(starch catabolic process);GO:0009507(chloroplast);GO:0016161(beta-amylase activity);GO:0080027(response to herbivore);GO:0102229(amylopectin maltohydrolase activity)	ko00500(Starch and sucrose metabolism)	662	5.5	2	2	NA	201.694	183.38	0	7.98e-43	5.38142e-42	yes
PC-3p-10861_575	TRINITY_DN23184_c0_g1	pumilio homolog 2 [Medicago truncatula]	APUM2	GO:0003723(RNA binding);GO:0003729(mRNA binding);GO:0003730(mRNA 3'-UTR binding);GO:0005737(cytoplasm);GO:0005829(cytosol);GO:0006417(regulation of translation)	NA	2454	9	NA	4	NA	0	30.5633	0	5.326e-14	6.30988e-14	yes
PC-3p-10861_575	TRINITY_DN23937_c0_g1	ATP-dependent zinc metalloprotease FTSH 9, chloroplastic isoform X1 [Medicago truncatula]	FTSH9	GO:0004176(ATP-dependent peptidase activity);GO:0005739(mitochondrion);GO:0006508(proteolysis);GO:0008237(metallopeptidase activity);GO:0009941(chloroplast envelope)	NA	541	9	NA	4	NA	0	30.5633	0	5.326e-14	6.30988e-14	yes
PC-3p-10861_575	TRINITY_DN23956_c0_g2	F-box/kelch-repeat protein At3g23880 [Medicago truncatula]	-	GO:0004842(ubiquitin-protein transferase activity);GO:0019005(SCF ubiquitin ligase complex);GO:0031146(SCF-dependent proteasomal ubiquitin-dependent protein catabolic process)	NA	723	10.5	NA	4	NA	0	30.5633	0	5.326e-14	6.30988e-14	yes
PC-3p-10861_575	TRINITY_DN24154_c0_g2	putative stearoyl-[acyl-carrier-protein] 9-desaturase [Medicago truncatula]	ACPD	GO:0002213(defense response to insect);GO:0004768(stearoyl-CoA 9-desaturase activity);GO:0006631(fatty acid metabolic process);GO:0006633(fatty acid biosynthetic process);GO:0006636(unsaturated fatty acid biosynthetic process);GO:0006952(defense response);GO:0008610(lipid biosynthetic process);GO:0009507(chloroplast);GO:0009534(chloroplast thylakoid);GO:0009536(plastid);GO:0009570(chloroplast str…	ko00061(Fatty acid biosynthesis);ko01040(Biosynthesis of unsaturated fatty acids)	799	8.5	2	2	3	645.422	397.323	236.351	5.3018e-44	3.63561e-43	yes
PC-3p-10861_575	TRINITY_DN24404_c0_g2	beta-amylase 3, chloroplastic [Medicago truncatula]	BAM3	GO:0000024(maltose biosynthetic process);GO:0005983(starch catabolic process);GO:0009409(response to cold);GO:0009507(chloroplast);GO:0009570(chloroplast stroma);GO:0016161(beta-amylase activity);GO:0102229(amylopectin maltohydrolase activity)	ko00500(Starch and sucrose metabolism)	1121	9	4	NA	NA	40.3388	0	0	3.0257e-18	5.71521e-18	yes
PC-3p-10861_575	TRINITY_DN24965_c1_g4	oxalate--CoA ligase [Medicago truncatula]	AAE3	GO:0005524(ATP binding);GO:0005737(cytoplasm);GO:0005739(mitochondrion);GO:0005829(cytosol);GO:0009506(plasmodesma);GO:0009507(chloroplast);GO:0009570(chloroplast stroma);GO:0009735(response to cytokinin);GO:0010030(positive regulation of seed germination);GO:0010214(seed coat development);GO:0016208(AMP binding);GO:0033611(oxalate catabolic process);GO:0046686(response to cadmium ion);GO:0048046…	ko00630(Glyoxylate and dicarboxylate metabolism)	388	10.5	NA	3	NA	0	61.1266	0	2.8349e-27	7.6679e-27	yes
PC-3p-10861_575	TRINITY_DN26132_c1_g1	clathrin heavy chain 2 [Medicago truncatula]	Os12g0104800	GO:0005198(structural molecule activity);GO:0005515(protein binding);GO:0005773(vacuole);GO:0005774(vacuolar membrane);GO:0005794(Golgi apparatus);GO:0005829(cytosol);GO:0005886(plasma membrane);GO:0006886(intracellular protein transport);GO:0006897(endocytosis);GO:0009506(plasmodesma);GO:0010118(stomatal movement);GO:0016192(vesicle-mediated transport);GO:0030130(clathrin coat of trans-Golgi net…	ko04144(Endocytosis)	3569	9.5	4	3	NA	40.3388	91.6898	0	1.4416e-21	3.51602e-21	yes
PC-3p-112962_35	TRINITY_DN13977_c0_g1	putative cullin protein, neddylation [Medicago truncatula]	CUL3A	GO:0031461(cullin-RING ubiquitin ligase complex);GO:0031625(ubiquitin protein ligase binding);GO:0061630(ubiquitin protein ligase activity)	ko04120(Ubiquitin mediated proteolysis)	1662	5.5	NA	4	NA	0	30.5633	0	5.326e-14	6.30988e-14	yes
PC-3p-112962_35	TRINITY_DN22115_c0_g1	putative ribonuclease H-like domain, reverse transcriptase zinc-binding domain-containing protein [Medicago truncatula]	-	GO:0003676(nucleic acid binding);GO:0003964(RNA-directed DNA polymerase activity);GO:0005739(mitochondrion);GO:0008150(biological_process)	NA	318	3	NA	4	NA	0	30.5633	0	5.326e-14	6.30988e-14	yes
PC-3p-112962_35	TRINITY_DN22115_c0_g1	putative ribonuclease H-like domain, reverse transcriptase zinc-binding domain-containing protein [Medicago truncatula]	-	GO:0003676(nucleic acid binding);GO:0003964(RNA-directed DNA polymerase activity);GO:0005739(mitochondrion);GO:0008150(biological_process)	NA	344	0	NA	4	2	0	30.5633	101.293	2.1117e-27	6.57705e-27	yes
PC-3p-112962_35	TRINITY_DN25052_c1_g2	PREDICTED: eukaryotic peptide chain release factor subunit 1-3-like [Erythranthe guttata]	ERF1-1	GO:0003747(translation release factor activity);GO:0005737(cytoplasm);GO:0006415(translational termination);GO:0040008(regulation of growth)	ko03015(mRNA surveillance pathway)	663	7	NA	NA	4	0	0	33.7644	2.1684e-15	3.13149e-15	yes
PC-3p-13773_457	TRINITY_DN12654_c0_g1	hypothetical protein glysoja_046468 [Glycine soja]	-	GO:0003674(molecular_function);GO:0005575(cellular_component);GO:0008150(biological_process)	NA	1022	10	NA	2	NA	0	61.1266	0	2.8349e-27	7.6679e-27	yes
PC-3p-13773_457	TRINITY_DN13036_c0_g1	trihelix transcription factor GT-3b [Medicago truncatula]	GT-3B	GO:0003700(DNA binding transcription factor activity);GO:0005515(protein binding);GO:0005634(nucleus);GO:0005730(nucleolus);GO:0006351(transcription, DNA-templated);GO:0006355(regulation of transcription, DNA-templated);GO:0016592(mediator complex);GO:0043565(sequence-specific DNA binding)	NA	1025	8	NA	NA	4	0	0	33.7644	2.1684e-15	3.13149e-15	yes
PC-3p-13773_457	TRINITY_DN14113_c0_g1	dehydrodolichyl diphosphate synthase 2 [Medicago truncatula]	At5g58770	GO:0002094(polyprenyltransferase activity);GO:0005829(cytosol);GO:0006486(protein glycosylation);GO:0009507(chloroplast);GO:0009570(chloroplast stroma);GO:0009668(plastid membrane organization);GO:0016094(polyprenol biosynthetic process);GO:0019408(dolichol biosynthetic process);GO:0045547(dehydrodolichyl diphosphate synthase activity)	ko00900(Terpenoid backbone biosynthesis)	273	21.5	2	2	NA	80.6777	122.253	0	1.5523e-25	4.06827e-25	yes
PC-3p-13773_457	TRINITY_DN14288_c0_g1	pre-mRNA-splicing factor 38 [Medicago truncatula]	PRP38	GO:0071011(precatalytic spliceosome)	ko03040(Spliceosome)	905	9.5	2	3	2	484.066	91.6898	371.408	6.8853e-57	8.74287e-56	yes
PC-3p-13773_457	TRINITY_DN14451_c0_g1	guanylate kinase 2 isoform X1 [Medicago truncatula]	GK-2	GO:0004385(guanylate kinase activity);GO:0005524(ATP binding);GO:0005737(cytoplasm);GO:0005829(cytosol);GO:0009117(nucleotide metabolic process);GO:0016310(phosphorylation);GO:0048229(gametophyte development);GO:0048638(regulation of developmental growth)	ko00230(Purine metabolism)	1094	8.5	4	NA	NA	40.3388	0	0	3.0257e-18	5.71521e-18	yes
PC-3p-13773_457	TRINITY_DN14534_c0_g1	-	-	NA	NA	899	8	NA	4	4	0	30.5633	33.7644	9.1976e-08	9.66516e-08	yes
PC-3p-13773_457	TRINITY_DN14610_c0_g1	mediator of RNA polymerase II transcription subunit 19a [Medicago truncatula]	MED19A	GO:0005515(protein binding);GO:0005634(nucleus);GO:0006351(transcription, DNA-templated);GO:0008134(transcription factor binding);GO:0016592(mediator complex);GO:0045944(positive regulation of transcription by RNA polymerase II)	ko04145(Phagosome)	746	24	NA	4	NA	0	30.5633	0	5.326e-14	6.30988e-14	yes
PC-3p-13773_457	TRINITY_DN14611_c0_g1	filament-like plant protein [Medicago truncatula]	FPP	GO:0005515(protein binding);GO:0030674(protein binding, bridging);GO:0031410(cytoplasmic vesicle);GO:0060178(regulation of exocyst localization)	NA	1622	5.5	NA	4	NA	0	30.5633	0	5.326e-14	6.30988e-14	yes
PC-3p-13773_457	TRINITY_DN15115_c0_g1	BTB/POZ and MATH domain-containing protein 4 [Medicago truncatula]	BPM4	GO:0005515(protein binding);GO:0005634(nucleus);GO:0005829(cytosol);GO:0006970(response to osmotic stress);GO:0016567(protein ubiquitination);GO:0042631(cellular response to water deprivation);GO:0071472(cellular response to salt stress)	NA	1286	7.5	NA	2	NA	0	91.6898	0	1.508e-40	8.68797e-40	yes
PC-3p-13773_457	TRINITY_DN15264_c1_g1	protein ENHANCED DISEASE RESISTANCE 4 [Medicago truncatula]	EDR4	GO:0005515(protein binding);GO:0005634(nucleus);GO:0005768(endosome);GO:0005886(plasma membrane);GO:0006897(endocytosis);GO:0006952(defense response);GO:0009620(response to fungus);GO:0009863(salicylic acid mediated signaling pathway);GO:0030100(regulation of endocytosis);GO:1900150(regulation of defense response to fungus)	NA	1061	10.5	NA	2	NA	0	61.1266	0	2.8349e-27	7.6679e-27	yes
PC-3p-13773_457	TRINITY_DN15419_c0_g3	transcription factor AS1 [Medicago truncatula]	AS1	GO:0000793(condensed chromosome);GO:0000981(RNA polymerase II transcription factor activity, sequence-specific DNA binding);GO:0001135(transcription factor activity, RNA polymerase II transcription factor recruiting);GO:0003677(DNA binding);GO:0003700(DNA binding transcription factor activity);GO:0005515(protein binding);GO:0005634(nucleus);GO:0005730(nucleolus);GO:0006351(transcription, DNA-temp…	NA	1273	11.5	NA	NA	3	0	0	67.5288	4.6985e-30	1.53517e-29	yes
PC-3p-13773_457	TRINITY_DN15477_c0_g1	indole-3-acetic acid-induced protein ARG2 [Medicago truncatula]	ARG2	GO:0000302(response to reactive oxygen species);GO:0003674(molecular_function);GO:0005739(mitochondrion);GO:0006950(response to stress);GO:0006952(defense response);GO:0006979(response to oxidative stress);GO:0009409(response to cold);GO:0009414(response to water deprivation);GO:0009416(response to light stimulus);GO:0009507(chloroplast);GO:0009625(response to insect);GO:0009646(response to absen…	NA	559	9	4	2	2	40.3388	244.506	236.351	3.9095e-34	1.69377e-33	yes
PC-3p-13773_457	TRINITY_DN15663_c0_g1	hypothetical protein MTR_3g455890 [Medicago truncatula]	-	NA	NA	324	10.5	2	NA	NA	80.6777	0	0	9.1449e-36	4.07513e-35	yes
PC-3p-13773_457	TRINITY_DN16204_c0_g1	40S ribosomal protein S16-like isoform X1 [Cicer arietinum]	RPS16	GO:0000462(maturation of SSU-rRNA from tricistronic rRNA transcript (SSU-rRNA, 5.8S rRNA, LSU-rRNA));GO:0003735(structural constituent of ribosome);GO:0006412(translation);GO:0022627(cytosolic small ribosomal subunit)	ko03010(Ribosome)	390	7.5	NA	NA	4	0	0	33.7644	2.1684e-15	3.13149e-15	yes
PC-3p-13773_457	TRINITY_DN17063_c0_g7	pentatricopeptide repeat-containing protein At5g03800 [Medicago truncatula]	EMB175	GO:0003723(RNA binding);GO:0003824(catalytic activity);GO:0004519(endonuclease activity);GO:0008270(zinc ion binding);GO:0009451(RNA modification);GO:0009507(chloroplast);GO:0009793(embryo development ending in seed dormancy);GO:0016020(membrane);GO:0043231(intracellular membrane-bounded organelle)	ko03440(Homologous recombination)	1799	8	2	NA	4	80.6777	0	33.7644	2.0412e-19	4.72738e-19	yes
PC-3p-13773_457	TRINITY_DN17337_c0_g1	luc7-like protein isoform X2 [Medicago truncatula]	crop	GO:0003729(mRNA binding);GO:0005685(U1 snRNP);GO:0006376(mRNA splice site selection);GO:0071004(U2-type prespliceosome)	NA	1169	10	NA	NA	2	0	0	168.822	4.758e-74	1.04621e-72	yes
PC-3p-13773_457	TRINITY_DN17476_c0_g1	uncharacterized protein LOC25493291 [Medicago truncatula]	-	GO:0003674(molecular_function);GO:0005634(nucleus)	NA	1296	8	2	NA	2	161.355	0	135.058	1.1328e-33	4.81081e-33	yes
PC-3p-13773_457	TRINITY_DN17570_c1_g1	photosystem I assembly factor PSA3, chloroplastic [Medicago truncatula]	-	GO:0005515(protein binding);GO:0005634(nucleus);GO:0005739(mitochondrion);GO:0009507(chloroplast);GO:0009535(chloroplast thylakoid membrane);GO:0009570(chloroplast stroma);GO:0009941(chloroplast envelope);GO:0048564(photosystem I assembly);GO:0098572(stromal side of plastid thylakoid membrane)	NA	419	10.5	2	2	2	564.744	305.633	438.937	1.9313e-17	3.63295e-17	yes
PC-3p-13773_457	TRINITY_DN18371_c0_g3	probable E3 ubiquitin-protein ligase ARI7 [Medicago truncatula]	ARI7	GO:0000151(ubiquitin ligase complex);GO:0000209(protein polyubiquitination);GO:0005737(cytoplasm);GO:0031624(ubiquitin conjugating enzyme binding);GO:0032436(positive regulation of proteasomal ubiquitin-dependent protein catabolic process);GO:0061630(ubiquitin protein ligase activity)	NA	796	10.5	4	4	NA	40.3388	30.5633	0	7.2896e-09	7.93241e-09	yes
PC-3p-13773_457	TRINITY_DN19011_c0_g1	uncharacterized protein LOC25494202 [Medicago truncatula]	-	GO:0003735(structural constituent of ribosome);GO:0006412(translation);GO:0022625(cytosolic large ribosomal subunit)	NA	612	9.5	4	NA	NA	40.3388	0	0	3.0257e-18	5.71521e-18	yes
PC-3p-13773_457	TRINITY_DN19013_c0_g3	heat stress transcription factor C-1 [Medicago truncatula]	HSFC1	GO:0003677(DNA binding);GO:0003700(DNA binding transcription factor activity);GO:0005515(protein binding);GO:0005634(nucleus);GO:0006351(transcription, DNA-templated);GO:0006355(regulation of transcription, DNA-templated);GO:0043565(sequence-specific DNA binding);GO:0061408(positive regulation of transcription from RNA polymerase II promoter in response to heat stress)	NA	1041	9.5	NA	3	NA	0	122.253	0	8.0164e-54	8.78795e-53	yes
PC-3p-13773_457	TRINITY_DN19777_c0_g2	aldo/keto reductase family oxidoreductase [Medicago truncatula]	PLR1	GO:0004033(aldo-keto reductase (NADP) activity);GO:0009443(pyridoxal 5'-phosphate salvage);GO:0009507(chloroplast);GO:0042820(vitamin B6 catabolic process);GO:0042821(pyridoxal biosynthetic process);GO:0050236(pyridoxine:NADP 4-dehydrogenase activity);GO:0055114(oxidation-reduction process);GO:0070402(NADPH binding)	ko00750(Vitamin ko6 metabolism)	532	5.5	4	2	2	40.3388	61.1266	101.293	6.7584e-07	7.07455e-07	yes
PC-3p-13773_457	TRINITY_DN19883_c0_g1	splicing factor U2af small subunit B isoform X2 [Medicago truncatula]	U2AF35B	GO:0000398(mRNA splicing, via spliceosome);GO:0003677(DNA binding);GO:0003723(RNA binding);GO:0005515(protein binding);GO:0005634(nucleus);GO:0005681(spliceosomal complex);GO:0016607(nuclear speck);GO:0030628(pre-mRNA 3'-splice site binding);GO:0046872(metal ion binding);GO:0048573(photoperiodism, flowering);GO:0089701(U2AF)	ko03040(Spliceosome)	664	12.5	3	2	2	80.6777	122.253	270.115	4.9292e-28	1.57486e-27	yes
PC-3p-13773_457	TRINITY_DN19883_c0_g1	splicing factor U2af small subunit B isoform X2 [Medicago truncatula]	U2AF35B	GO:0000398(mRNA splicing, via spliceosome);GO:0003677(DNA binding);GO:0003723(RNA binding);GO:0005515(protein binding);GO:0005634(nucleus);GO:0005681(spliceosomal complex);GO:0016607(nuclear speck);GO:0030628(pre-mRNA 3'-splice site binding);GO:0046872(metal ion binding);GO:0048573(photoperiodism, flowering);GO:0089701(U2AF)	ko03040(Spliceosome)	787	8	3	3	2	161.355	61.1266	168.822	9.0463e-13	1.04437e-12	yes
PC-3p-13773_457	TRINITY_DN20311_c0_g2	external alternative NAD(P)H-ubiquinone oxidoreductase B1, mitochondrial [Medicago truncatula]	NDB1	GO:0005758(mitochondrial intermembrane space);GO:0016491(oxidoreductase activity);GO:0055114(oxidation-reduction process)	NA	1715	6	NA	4	NA	0	30.5633	0	5.326e-14	6.30988e-14	yes
PC-3p-13773_457	TRINITY_DN20520_c0_g1	probable U3 small nucleolar RNA-associated protein 11 [Medicago truncatula]	Os01g0810000	GO:0005730(nucleolus);GO:0006364(rRNA processing);GO:0032040(small-subunit processome);GO:0042274(ribosomal small subunit biogenesis)	NA	746	11.5	4	4	4	40.3388	30.5633	33.7644	0.49068	0.491154	yes
PC-3p-13773_457	TRINITY_DN20733_c0_g1	putative transcription regulator SAP family [Medicago truncatula]	RRC1	GO:0003723(RNA binding);GO:0005634(nucleus);GO:0006397(mRNA processing);GO:0008380(RNA splicing);GO:0016607(nuclear speck)	ko03040(Spliceosome)	2997	7.5	NA	3	NA	0	61.1266	0	2.8349e-27	7.6679e-27	yes
PC-3p-13773_457	TRINITY_DN21148_c0_g3	RGPR-like protein [Medicago truncatula]	SEC16B	GO:0000139(Golgi membrane);GO:0005634(nucleus);GO:0005783(endoplasmic reticulum);GO:0015031(protein transport);GO:0048208(COPII vesicle coating);GO:0070973(protein localization to endoplasmic reticulum exit site)	NA	803	8	2	1	2	80.6777	244.506	67.5288	5.5034e-33	2.27692e-32	yes
PC-3p-13773_457	TRINITY_DN21357_c0_g2	putative transcription factor C3H family [Medicago truncatula]	At2g02160	GO:0003676(nucleic acid binding);GO:0003677(DNA binding);GO:0003729(mRNA binding);GO:0005634(nucleus);GO:0046872(metal ion binding)	NA	1451	8	3	2	4	80.6777	122.253	33.7644	1.6245e-11	1.85736e-11	yes
PC-3p-13773_457	TRINITY_DN21405_c0_g1	uncharacterized protein LOC25489836 [Medicago truncatula]	-	GO:0005886(plasma membrane);GO:0015079(potassium ion transmembrane transporter activity)	NA	491	7.5	2	2	0	726.099	5990.4	2869.97	0	0	yes
PC-3p-13773_457	TRINITY_DN21544_c0_g1	trihelix transcription factor GT-2 [Medicago truncatula]	GT-2	GO:0003700(DNA binding transcription factor activity);GO:0005634(nucleus);GO:0006355(regulation of transcription, DNA-templated);GO:0010192(mucilage biosynthetic process);GO:0019760(glucosinolate metabolic process);GO:0043565(sequence-specific DNA binding);GO:0044212(transcription regulatory region DNA binding)	NA	666	16.5	3	3	3	201.694	213.943	101.293	2.3451e-10	2.6668e-10	yes
PC-3p-13773_457	TRINITY_DN21992_c0_g2	putative cyclin [Medicago truncatula]	CYCT1-5	GO:0000307(cyclin-dependent protein kinase holoenzyme complex);GO:0005634(nucleus);GO:0016538(cyclin-dependent protein serine/threonine kinase regulator activity);GO:0045737(positive regulation of cyclin-dependent protein serine/threonine kinase activity);GO:0045944(positive regulation of transcription by RNA polymerase II);GO:1901409(positive regulation of phosphorylation of RNA polymerase II C-…	NA	801	14.5	4	4	NA	40.3388	30.5633	0	7.2896e-09	7.93241e-09	yes
PC-3p-13773_457	TRINITY_DN22097_c0_g1	putative pre-mRNA-splicing factor 38 [Medicago truncatula]	SRL1	GO:0071011(precatalytic spliceosome)	ko03040(Spliceosome)	1298	32.5	4	2	NA	40.3388	183.38	0	8.2509e-55	1.01488e-53	yes
PC-3p-13773_457	TRINITY_DN22097_c0_g1	putative pre-mRNA-splicing factor 38 [Medicago truncatula]	SRL1	GO:0071011(precatalytic spliceosome)	ko03040(Spliceosome)	1327	8	2	2	3	121.017	122.253	67.5288	8.0775e-05	8.33736e-05	yes
PC-3p-13773_457	TRINITY_DN22138_c0_g2	RNA-binding protein 39 [Medicago truncatula]	RBM39	GO:0003676(nucleic acid binding);GO:0005634(nucleus);GO:0006397(mRNA processing)	NA	347	9	2	2	2	322.711	122.253	168.822	4.3013e-24	1.10267e-23	yes
PC-3p-13773_457	TRINITY_DN22138_c0_g2	RNA-binding protein 39 [Medicago truncatula]	RBM39	GO:0003676(nucleic acid binding);GO:0005634(nucleus);GO:0006397(mRNA processing)	NA	384	8	3	4	2	80.6777	30.5633	303.88	3.4747e-67	6.10754e-66	yes
PC-3p-13773_457	TRINITY_DN22555_c0_g3	uncharacterized protein LOC25486955 [Medicago truncatula]	-	GO:0003674(molecular_function);GO:0005634(nucleus);GO:0008150(biological_process)	NA	1175	4.5	NA	4	NA	0	30.5633	0	5.326e-14	6.30988e-14	yes
PC-3p-13773_457	TRINITY_DN23020_c0_g1	CBL-interacting serine/threonine-protein kinase 11 [Medicago truncatula]	CIPK11	GO:0004672(protein kinase activity);GO:0004674(protein serine/threonine kinase activity);GO:0005515(protein binding);GO:0005524(ATP binding);GO:0005622(intracellular);GO:0005886(plasma membrane);GO:0006468(protein phosphorylation);GO:0009268(response to pH);GO:0016301(kinase activity);GO:0018105(peptidyl-serine phosphorylation);GO:0018107(peptidyl-threonine phosphorylation);GO:0035556(intracellul…	NA	443	6.5	3	4	NA	80.6777	30.5633	0	3.6961e-20	8.81092e-20	yes
PC-3p-13773_457	TRINITY_DN23053_c0_g1	hypothetical protein MtrunA17_Chr1g0188561 [Medicago truncatula]	-	GO:0003674(molecular_function);GO:0005634(nucleus);GO:0008150(biological_process)	NA	2676	6	NA	4	2	0	30.5633	135.058	3.4804e-40	1.97223e-39	yes
PC-3p-13773_457	TRINITY_DN23156_c0_g1	SCY1-like protein 2 [Medicago truncatula]	Scyl2	GO:0005737(cytoplasm);GO:0005829(cytosol);GO:0016301(kinase activity)	NA	2892	6	NA	4	NA	0	30.5633	0	5.326e-14	6.30988e-14	yes
PC-3p-13773_457	TRINITY_DN23302_c0_g3	leucine-rich repeat extensin-like protein 5 [Medicago truncatula]	-	GO:0003674(molecular_function);GO:0005634(nucleus);GO:0008150(biological_process)	ko00380(Tryptophan metabolism)	1283	9.5	NA	4	NA	0	30.5633	0	5.326e-14	6.30988e-14	yes
PC-3p-13773_457	TRINITY_DN23402_c1_g4	cellulose synthase A catalytic subunit 2 [UDP-forming] [Medicago truncatula]	CESA2	GO:0000977(RNA polymerase II regulatory region sequence-specific DNA binding);GO:0005794(Golgi apparatus);GO:0005886(plasma membrane);GO:0009833(plant-type primary cell wall biogenesis);GO:0016021(integral component of membrane);GO:0016757(transferase activity, transferring glycosyl groups);GO:0016759(cellulose synthase activity);GO:0016760(cellulose synthase (UDP-forming) activity);GO:0030244(ce…	NA	2567	7.5	4	2	NA	40.3388	122.253	0	7.9994e-32	3.25637e-31	yes
PC-3p-13773_457	TRINITY_DN23614_c0_g1	putative WW domain, FF domain-containing protein [Medicago truncatula]	PRP40A	GO:0000398(mRNA splicing, via spliceosome);GO:0003723(RNA binding);GO:0005685(U1 snRNP);GO:0071004(U2-type prespliceosome)	ko03040(Spliceosome)	1566	10	NA	4	NA	0	30.5633	0	5.326e-14	6.30988e-14	yes
PC-3p-13773_457	TRINITY_DN23643_c0_g1	Y2K4 dehydrin variant G1, partial [Medicago sativa]	DHN3	NA	NA	140	11.5	NA	NA	2	0	0	202.586	0	0	yes
PC-3p-13773_457	TRINITY_DN23737_c1_g2	phospholipid-transporting ATPase 3 [Medicago truncatula]	ALA3	GO:0004012(phospholipid-translocating ATPase activity);GO:0005802(trans-Golgi network);GO:0005886(plasma membrane);GO:0048194(Golgi vesicle budding)	NA	1588	8.5	4	NA	4	40.3388	0	33.7644	5.8097e-09	6.43576e-09	yes
PC-3p-13773_457	TRINITY_DN23827_c0_g3	U-box domain-containing protein 38 [Medicago truncatula]	PUB38	GO:0005634(nucleus);GO:0005737(cytoplasm)	NA	1423	5	2	3	4	201.694	91.6898	33.7644	1.0455e-29	3.4043e-29	yes
PC-3p-13773_457	TRINITY_DN23850_c0_g1	hypothetical protein TSUD_227820 [Trifolium subterraneum]	-	NA	NA	312	9	3	NA	NA	80.6777	0	0	9.1449e-36	4.07513e-35	yes
PC-3p-13773_457	TRINITY_DN23924_c0_g1	elongation factor 1-beta [Medicago truncatula]	-	GO:0003746(translation elongation factor activity);GO:0005829(cytosol);GO:0005840(ribosome);GO:0005853(eukaryotic translation elongation factor 1 complex);GO:0005886(plasma membrane);GO:0006414(translational elongation);GO:0009808(lignin metabolic process);GO:0016021(integral component of membrane);GO:0046686(response to cadmium ion);GO:0071668(plant-type cell wall assembly);GO:2001006(regulation…	NA	500	9.5	4	NA	NA	40.3388	0	0	3.0257e-18	5.71521e-18	yes
PC-3p-13773_457	TRINITY_DN24079_c0_g1	putative ANTH domain-containing protein [Medicago truncatula]	At2g01600	GO:0005545(1-phosphatidylinositol binding);GO:0005794(Golgi apparatus);GO:0005886(plasma membrane);GO:0005905(clathrin-coated pit);GO:0006897(endocytosis);GO:0016020(membrane);GO:0030136(clathrin-coated vesicle);GO:0030276(clathrin binding);GO:0048268(clathrin coat assembly)	NA	663	6.5	NA	NA	4	0	0	33.7644	2.1684e-15	3.13149e-15	yes
PC-3p-13773_457	TRINITY_DN24190_c0_g1	pre-mRNA-splicing factor SYF1 [Medicago truncatula]	Xab2	GO:0000349(generation of catalytic spliceosome for first transesterification step);GO:0000974(Prp19 complex);GO:0071010(prespliceosome);GO:0071012(catalytic step 1 spliceosome);GO:0071013(catalytic step 2 spliceosome);GO:0071014(post-mRNA release spliceosomal complex)	ko03040(Spliceosome)	1665	6	NA	4	NA	0	30.5633	0	5.326e-14	6.30988e-14	yes
PC-3p-13773_457	TRINITY_DN24216_c0_g1	U4/U6 small nuclear Prp3-like ribonucleoprotein [Medicago truncatula]	PRPF3	GO:0000398(mRNA splicing, via spliceosome);GO:0046540(U4/U6 x U5 tri-snRNP complex)	ko03040(Spliceosome)	279	8.5	2	NA	NA	121.017	0	0	2.761e-53	2.58192e-52	yes
PC-3p-13773_457	TRINITY_DN24449_c0_g1	WEB family protein At2g38370 [Medicago truncatula]	At2g38370	GO:0005829(cytosol);GO:0009903(chloroplast avoidance movement);GO:0009904(chloroplast accumulation movement)	NA	339	29	NA	2	NA	0	61.1266	0	2.8349e-27	7.6679e-27	yes
PC-3p-13773_457	TRINITY_DN24520_c0_g2	transcription factor BIM1 isoform X2 [Medicago truncatula]	BIM1	GO:0005634(nucleus)	NA	1440	7.5	4	4	2	40.3388	30.5633	101.293	7.6703e-12	8.79363e-12	yes
PC-3p-13773_457	TRINITY_DN24541_c0_g1	brassinosteroid LRR receptor kinase [Medicago truncatula]	-	GO:0004672(protein kinase activity);GO:0004674(protein serine/threonine kinase activity);GO:0004714(transmembrane receptor protein tyrosine kinase activity);GO:0005496(steroid binding);GO:0005515(protein binding);GO:0005524(ATP binding);GO:0005768(endosome);GO:0005886(plasma membrane);GO:0009506(plasmodesma);GO:0009729(detection of brassinosteroid stimulus);GO:0009742(brassinosteroid mediated sig…	ko04075(Plant hormone signal transduction)	2983	13.5	4	NA	NA	40.3388	0	0	3.0257e-18	5.71521e-18	yes
PC-3p-13773_457	TRINITY_DN24675_c0_g2	cryptochrome-1 isoform X2 [Medicago truncatula]	CRY1	GO:0004672(protein kinase activity);GO:0005515(protein binding);GO:0005524(ATP binding);GO:0005634(nucleus);GO:0005737(cytoplasm);GO:0006952(defense response);GO:0007623(circadian rhythm);GO:0009414(response to water deprivation);GO:0009416(response to light stimulus);GO:0009583(detection of light stimulus);GO:0009637(response to blue light);GO:0009638(phototropism);GO:0009640(photomorphogenesis)…	ko04712(Circadian rhythm - plant)	2080	6	3	2	2	80.6777	91.6898	135.058	0.00031387	0.000323557	yes
PC-3p-13773_457	TRINITY_DN24679_c0_g1	isoleucine--tRNA ligase, cytoplasmic [Medicago truncatula]	At4g10320	GO:0004822(isoleucine-tRNA ligase activity);GO:0005829(cytosol);GO:0006428(isoleucyl-tRNA aminoacylation)	ko00970(Aminoacyl-tRNA biosynthesis)	2671	7	NA	4	NA	0	30.5633	0	5.326e-14	6.30988e-14	yes
PC-3p-13773_457	TRINITY_DN24902_c0_g1	SWAP (suppressor-of-white-APricot)/surp domain protein, putative [Medicago truncatula]	-	GO:0000395(mRNA 5'-splice site recognition)	NA	899	6.5	2	NA	4	161.355	0	33.7644	4.3258e-49	3.76689e-48	yes
PC-3p-13773_457	TRINITY_DN25301_c0_g2	stromal processing peptidase, chloroplastic [Medicago truncatula]	SPP	GO:0004222(metalloendopeptidase activity);GO:0009570(chloroplast stroma);GO:0016485(protein processing);GO:0046872(metal ion binding)	NA	3492	7.5	NA	4	3	0	30.5633	67.5288	6.4851e-16	1.17172e-15	yes
PC-3p-13773_457	TRINITY_DN25453_c0_g1	NADPH--cytochrome P450 reductase [Medicago truncatula]	CPR	GO:0030586([methionine synthase] reductase activity)	NA	705	10.5	4	NA	NA	40.3388	0	0	3.0257e-18	5.71521e-18	yes
PC-3p-13773_457	TRINITY_DN25720_c1_g1	calcium permeable stress-gated cation channel 1 [Medicago truncatula]	CSC1	GO:0005227(calcium activated cation channel activity);GO:0005886(plasma membrane);GO:0006812(cation transport);GO:0016021(integral component of membrane)	NA	2039	27.5	2	NA	4	121.017	0	33.7644	1.4877e-33	6.23662e-33	yes
PC-3p-13773_457	TRINITY_DN25761_c1_g2	cyclic nucleotide-gated ion channel 4 [Medicago truncatula]	CNGC4	GO:0005249(voltage-gated potassium channel activity);GO:0005887(integral component of plasma membrane);GO:0042391(regulation of membrane potential)	ko04626(Plant-pathogen interaction)	987	7	2	4	NA	80.6777	30.5633	0	3.6961e-20	8.81092e-20	yes
PC-3p-13773_457	TRINITY_DN26151_c2_g1	soyasapogenol B glucuronide galactosyltransferase [Medicago truncatula]	GmSGT2	GO:0009813(flavonoid biosynthetic process);GO:0043231(intracellular membrane-bounded organelle);GO:0052696(flavonoid glucuronidation);GO:0080043(quercetin 3-O-glucosyltransferase activity);GO:0080044(quercetin 7-O-glucosyltransferase activity)	NA	1329	10	2	4	3	322.711	30.5633	135.058	3.34e-59	4.37271e-58	yes
PC-3p-13773_457	TRINITY_DN26247_c4_g1	RRP12-like protein isoform X1 [Medicago truncatula]	RRP12	GO:0005634(nucleus);GO:0008150(biological_process)	NA	3543	5	NA	4	2	0	30.5633	168.822	1.3213e-53	1.41046e-52	yes
PC-3p-13773_457	TRINITY_DN26296_c0_g1	homeobox-DDT domain protein RLT1 isoform X2 [Medicago truncatula]	RLT1	GO:0003700(DNA binding transcription factor activity);GO:0005515(protein binding);GO:0005634(nucleus);GO:0006355(regulation of transcription, DNA-templated);GO:0010228(vegetative to reproductive phase transition of meristem)	NA	1263	15	NA	2	2	0	244.506	168.822	4.0054e-50	3.59224e-49	yes
PC-3p-13773_457	TRINITY_DN26356_c2_g1	LOW QUALITY PROTEIN: hypothetical protein GLYMA_13G023600 [Glycine max]	ART2	GO:0003690(double-stranded DNA binding);GO:0003700(DNA binding transcription factor activity);GO:0008134(transcription factor binding);GO:0008283(cell proliferation);GO:0009303(rRNA transcription)	NA	756	16.5	NA	4	NA	0	30.5633	0	5.326e-14	6.30988e-14	yes
PC-3p-13773_457	TRINITY_DN26359_c1_g4	-	-	NA	NA	483	10	NA	2	NA	0	61.1266	0	2.8349e-27	7.6679e-27	yes
PC-3p-13773_457	TRINITY_DN26360_c2_g2	phosphatidylinositol transfer protein 3 [Medicago truncatula]	sec14l1	GO:0005215(transporter activity);GO:0005886(plasma membrane);GO:0006810(transport)	ko03015(mRNA surveillance pathway)	376	11	4	NA	NA	40.3388	0	0	3.0257e-18	5.71521e-18	yes
PC-3p-13773_457	TRINITY_DN26400_c1_g1	splicing factor 3B subunit 1 [Medicago truncatula]	SF3B1	GO:0000245(spliceosomal complex assembly);GO:0003729(mRNA binding);GO:0005686(U2 snRNP);GO:0005689(U12-type spliceosomal complex);GO:0071004(U2-type prespliceosome);GO:0071013(catalytic step 2 spliceosome)	ko03040(Spliceosome)	3444	29.5	NA	2	4	0	61.1266	33.7644	1.3397e-13	1.5644e-13	yes
PC-3p-15383_407	TRINITY_DN15309_c1_g3	protein WALLS ARE THIN 1 [Medicago truncatula]	WAT1	GO:0005886(plasma membrane);GO:0006810(transport);GO:0022857(transmembrane transporter activity)	NA	1406	18	4	NA	4	40.3388	0	33.7644	5.8097e-09	6.43576e-09	yes
PC-3p-15383_407	TRINITY_DN15555_c0_g1	uncharacterized protein LOC11437135 [Medicago truncatula]	Dnajb13	GO:0006457(protein folding)	NA	642	13	NA	4	NA	0	30.5633	0	5.326e-14	6.30988e-14	yes
PC-3p-15383_407	TRINITY_DN15672_c0_g3	BAG family molecular chaperone regulator 4 [Medicago truncatula]	BAG4	GO:0005634(nucleus);GO:0005829(cytosol);GO:0009408(response to heat);GO:0009409(response to cold);GO:0009651(response to salt stress);GO:0010228(vegetative to reproductive phase transition of meristem);GO:0051087(chaperone binding)	ko04141(Protein processing in endoplasmic reticulum)	276	14	4	NA	NA	40.3388	0	0	3.0257e-18	5.71521e-18	yes
PC-3p-15383_407	TRINITY_DN17357_c0_g2	sucrose transport protein SUC3 isoform X1 [Medicago truncatula]	SUC3	GO:0005351(carbohydrate:proton symporter activity);GO:0005794(Golgi apparatus);GO:0005886(plasma membrane);GO:0005985(sucrose metabolic process);GO:0008506(sucrose:proton symporter activity);GO:0008515(sucrose transmembrane transporter activity);GO:0009611(response to wounding);GO:0015144(carbohydrate transmembrane transporter activity);GO:0015293(symporter activity);GO:0015770(sucrose transport)…	NA	842	9	NA	4	NA	0	30.5633	0	5.326e-14	6.30988e-14	yes
PC-3p-15383_407	TRINITY_DN18398_c0_g3	protein KINESIN LIGHT CHAIN-RELATED 1 [Medicago truncatula]	KLCR2	GO:0005886(plasma membrane);GO:0009860(pollen tube growth);GO:0031347(regulation of defense response)	NA	57	21	2	2	2	363.05	427.886	540.23	1.3518e-08	1.4654e-08	yes
PC-3p-15383_407	TRINITY_DN18814_c0_g3	-	-	NA	NA	383	3	NA	NA	4	0	0	33.7644	2.1684e-15	3.13149e-15	yes
PC-3p-15383_407	TRINITY_DN19688_c0_g2	acetolactate synthase [Medicago littoralis]	-	GO:0000287(magnesium ion binding);GO:0003984(acetolactate synthase activity);GO:0004737(pyruvate decarboxylase activity);GO:0005515(protein binding);GO:0009082(branched-chain amino acid biosynthetic process);GO:0009097(isoleucine biosynthetic process);GO:0009099(valine biosynthetic process);GO:0009507(chloroplast);GO:0009570(chloroplast stroma);GO:0009635(response to herbicide);GO:0030976(thiamin…	ko00650(Butanoate metabolism);ko00660(ko5-Branched dibasic acid metabolism);ko00290(Valine, leucine and isoleucine biosynthesis);ko00770(Pantothenate and CoA biosynthesis)	1005	12.5	3	NA	2	80.6777	0	236.351	4.7233e-60	6.9868e-59	yes
PC-3p-15383_407	TRINITY_DN20789_c0_g6	UDP-glycosyltransferase 43 [Medicago truncatula]	UGT71K1	GO:0009813(flavonoid biosynthetic process);GO:0043231(intracellular membrane-bounded organelle);GO:0052696(flavonoid glucuronidation);GO:0080043(quercetin 3-O-glucosyltransferase activity);GO:0080044(quercetin 7-O-glucosyltransferase activity)	NA	1145	14	4	NA	NA	40.3388	0	0	3.0257e-18	5.71521e-18	yes
PC-3p-15383_407	TRINITY_DN23852_c0_g2	auxin response factor 19 isoform X1 [Medicago truncatula]	ARF7	GO:0003677(DNA binding);GO:0003700(DNA binding transcription factor activity);GO:0005515(protein binding);GO:0005634(nucleus);GO:0006351(transcription, DNA-templated);GO:0006355(regulation of transcription, DNA-templated);GO:0009723(response to ethylene);GO:0009733(response to auxin);GO:0009734(auxin-activated signaling pathway);GO:0010311(lateral root formation);GO:0043565(sequence-specific DNA …	ko04075(Plant hormone signal transduction)	981	6	NA	2	NA	0	91.6898	0	1.508e-40	8.68797e-40	yes
PC-3p-15383_407	TRINITY_DN24355_c0_g1	non-specific phospholipase C1 [Medicago truncatula]	NPC1	GO:0003993(acid phosphatase activity);GO:0005576(extracellular region);GO:0005886(plasma membrane);GO:0009395(phospholipid catabolic process);GO:0016788(hydrolase activity, acting on ester bonds)	ko00562(Inositol phosphate metabolism);ko00564(Glycerophospholipid metabolism);ko00565(Ether lipid metabolism)	192	10	NA	NA	4	0	0	33.7644	2.1684e-15	3.13149e-15	yes
PC-3p-15383_407	TRINITY_DN24501_c0_g3	probable galacturonosyltransferase 9 [Medicago truncatula]	GAUT9	GO:0000139(Golgi membrane);GO:0005768(endosome);GO:0005794(Golgi apparatus);GO:0005802(trans-Golgi network);GO:0016021(integral component of membrane);GO:0016051(carbohydrate biosynthetic process);GO:0016757(transferase activity, transferring glycosyl groups);GO:0016758(transferase activity, transferring hexosyl groups);GO:0045489(pectin biosynthetic process);GO:0047262(polygalacturonate 4-alpha-…	ko00520(Amino sugar and nucleotide sugar metabolism)	708	10	4	4	NA	40.3388	30.5633	0	7.2896e-09	7.93241e-09	yes
PC-3p-15383_407	TRINITY_DN24613_c0_g1	enhancer of mRNA-decapping protein 4 [Medicago truncatula]	VCS	GO:0000166(nucleotide binding);GO:0000932(P-body);GO:0003729(mRNA binding);GO:0005515(protein binding);GO:0005634(nucleus);GO:0005829(cytosol);GO:0006397(mRNA processing);GO:0006402(mRNA catabolic process);GO:0009791(post-embryonic development);GO:0009965(leaf morphogenesis);GO:0010071(root meristem specification);GO:0010072(primary shoot apical meristem specification);GO:0031087(deadenylation-in…	ko03018(RNA degradation)	2644	13	NA	NA	2	0	0	67.5288	4.6985e-30	1.53517e-29	yes
PC-3p-15383_407	TRINITY_DN24766_c0_g1	putative guanylate-binding protein [Medicago truncatula]	GBP6	GO:0003924(GTPase activity);GO:0005525(GTP binding);GO:0005634(nucleus);GO:0005730(nucleolus);GO:0006955(immune response);GO:0009507(chloroplast)	NA	2364	17.5	2	2	2	201.694	91.6898	236.351	9.2588e-15	1.32385e-14	yes
PC-3p-15383_407	TRINITY_DN24809_c0_g1	heat shock protein 90-5, chloroplastic [Medicago truncatula]	HSP90-5	GO:0005515(protein binding);GO:0005524(ATP binding);GO:0005739(mitochondrion);GO:0005774(vacuolar membrane);GO:0005829(cytosol);GO:0006457(protein folding);GO:0009408(response to heat);GO:0009414(response to water deprivation);GO:0009507(chloroplast);GO:0009536(plastid);GO:0009570(chloroplast stroma);GO:0009651(response to salt stress);GO:0009704(de-etiolation);GO:0009793(embryo development endin…	ko04141(Protein processing in endoplasmic reticulum);ko04626(Plant-pathogen interaction)	604	14	NA	4	NA	0	30.5633	0	5.326e-14	6.30988e-14	yes
PC-3p-15383_407	TRINITY_DN25184_c0_g1	pyrophosphate-energized vacuolar membrane proton pump [Medicago truncatula]	-	GO:0000325(plant-type vacuole);GO:0004427(inorganic diphosphatase activity);GO:0005739(mitochondrion);GO:0005773(vacuole);GO:0005774(vacuolar membrane);GO:0005794(Golgi apparatus);GO:0005829(cytosol);GO:0005886(plasma membrane);GO:0009414(response to water deprivation);GO:0009507(chloroplast);GO:0009651(response to salt stress);GO:0009678(hydrogen-translocating pyrophosphatase activity);GO:000970…	ko00190(Oxidative phosphorylation)	1667	14	4	NA	NA	40.3388	0	0	3.0257e-18	5.71521e-18	yes
PC-3p-15383_407	TRINITY_DN25495_c1_g1	TOM1-like protein 6 isoform X1 [Medicago truncatula]	Hgs	GO:0005622(intracellular);GO:0005623(cell);GO:0005634(nucleus);GO:0005737(cytoplasm);GO:0005769(early endosome);GO:0005771(multivesicular body);GO:0005795(Golgi stack);GO:0005886(plasma membrane);GO:0006886(intracellular protein transport);GO:0006891(intra-Golgi vesicle-mediated transport);GO:0031901(early endosome membrane);GO:0043130(ubiquitin binding);GO:0043328(protein transport to vacuole in…	NA	1915	18.5	2	4	NA	161.355	30.5633	0	1.3383e-50	1.20882e-49	yes
PC-3p-15383_407	TRINITY_DN25693_c1_g1	putative xenobiotic-transporting ATPase [Medicago truncatula]	ABCC14	GO:0000325(plant-type vacuole);GO:0005524(ATP binding);GO:0005773(vacuole);GO:0005774(vacuolar membrane);GO:0005794(Golgi apparatus);GO:0005886(plasma membrane);GO:0008559(xenobiotic transmembrane transporting ATPase activity);GO:0016020(membrane);GO:0016021(integral component of membrane);GO:0042626(ATPase activity, coupled to transmembrane movement of substances);GO:0055085(transmembrane transp…	ko02010(ABC transporters)	4077	12.5	NA	3	NA	0	61.1266	0	2.8349e-27	7.6679e-27	yes
PC-3p-15383_407	TRINITY_DN25911_c0_g1	puromycin-sensitive aminopeptidase isoform X1 [Medicago truncatula]	MPA1	GO:0005737(cytoplasm);GO:0005886(plasma membrane);GO:0006508(proteolysis);GO:0008270(zinc ion binding);GO:0042277(peptide binding);GO:0043171(peptide catabolic process);GO:0070006(metalloaminopeptidase activity)	ko00480(Glutathione metabolism)	3031	6	NA	2	4	0	61.1266	33.7644	1.3397e-13	1.5644e-13	yes
PC-3p-230499_12	TRINITY_DN14809_c0_g2	GDSL esterase/lipase At1g33811 [Medicago truncatula]	At1g33811	GO:0005576(extracellular region);GO:0016042(lipid catabolic process);GO:0016788(hydrolase activity, acting on ester bonds);GO:0052689(carboxylic ester hydrolase activity)	ko00561(Glycerolipid metabolism)	248	8	NA	NA	2	0	0	101.293	1.0173e-44	7.03524e-44	yes
PC-3p-230499_12	TRINITY_DN20851_c1_g2	probable glucan 1,3-beta-glucosidase A [Medicago truncatula]	exgA	GO:0004338(glucan exo-1,3-beta-glucosidase activity);GO:0005576(extracellular region);GO:0006073(cellular glucan metabolic process);GO:0009251(glucan catabolic process);GO:0009277(fungal-type cell wall);GO:0009986(cell surface);GO:0031505(fungal-type cell wall organization)	ko00500(Starch and sucrose metabolism)	1739	7.5	NA	NA	4	0	0	33.7644	2.1684e-15	3.13149e-15	yes
PC-3p-230499_12	TRINITY_DN21995_c0_g2	-	-	NA	NA	32	7	3	NA	NA	80.6777	0	0	9.1449e-36	4.07513e-35	yes
PC-3p-230499_12	TRINITY_DN23772_c0_g5	UDP-glucuronic acid decarboxylase 2 [Medicago truncatula]	UXS2	GO:0000139(Golgi membrane);GO:0003824(catalytic activity);GO:0005768(endosome);GO:0005794(Golgi apparatus);GO:0005802(trans-Golgi network);GO:0005829(cytosol);GO:0005886(plasma membrane);GO:0008460(dTDP-glucose 4,6-dehydratase activity);GO:0009225(nucleotide-sugar metabolic process);GO:0016020(membrane);GO:0016021(integral component of membrane);GO:0019305(dTDP-rhamnose biosynthetic process);GO:0…	ko00520(Amino sugar and nucleotide sugar metabolism)	663	7	NA	4	4	0	30.5633	33.7644	9.1976e-08	9.66516e-08	yes
PC-3p-230499_12	TRINITY_DN24505_c0_g1	uncharacterized protein LOC25495007 [Medicago truncatula]	-	GO:0004842(ubiquitin-protein transferase activity);GO:0005576(extracellular region);GO:0008270(zinc ion binding)	NA	1270	8	NA	NA	2	0	0	67.5288	4.6985e-30	1.53517e-29	yes
PC-3p-230499_12	TRINITY_DN25307_c0_g1	two-component response regulator-like APRR2 isoform X2 [Medicago truncatula]	APRR2	GO:0000156(phosphorelay response regulator activity);GO:0000160(phosphorelay signal transduction system);GO:0003677(DNA binding);GO:0003700(DNA binding transcription factor activity);GO:0005515(protein binding);GO:0005634(nucleus);GO:0006351(transcription, DNA-templated);GO:0006355(regulation of transcription, DNA-templated);GO:0007623(circadian rhythm)	ko04075(Plant hormone signal transduction)	712	13.5	NA	NA	4	0	0	33.7644	2.1684e-15	3.13149e-15	yes
PC-3p-242522_11	TRINITY_DN17409_c0_g1	G-type lectin S-receptor-like serine/threonine-protein kinase At1g34300 [Medicago truncatula]	At1g34300	GO:0004674(protein serine/threonine kinase activity);GO:0005886(plasma membrane);GO:0006468(protein phosphorylation)	NA	1926	11.5	NA	NA	4	0	0	33.7644	2.1684e-15	3.13149e-15	yes
PC-3p-242522_11	TRINITY_DN17979_c1_g3	ATP synthase subunit beta, chloroplastic [Artemisia annua]	ycf68-1	GO:0009536(plastid)	ko00941(Flavonoid biosynthesis)	2859	7.5	3	3	3	8390.48	3056.33	1012.93	0	0	yes
PC-3p-242522_11	TRINITY_DN19485_c0_g1	UPF0183 protein At3g51130 isoform X2 [Medicago truncatula]	At3g51130	GO:0005739(mitochondrion)	NA	1122	10.5	NA	NA	4	0	0	33.7644	2.1684e-15	3.13149e-15	yes
PC-3p-242522_11	TRINITY_DN21544_c0_g1	trihelix transcription factor GT-2 [Medicago truncatula]	GT-2	GO:0003700(DNA binding transcription factor activity);GO:0005634(nucleus);GO:0006355(regulation of transcription, DNA-templated);GO:0010192(mucilage biosynthetic process);GO:0019760(glucosinolate metabolic process);GO:0043565(sequence-specific DNA binding);GO:0044212(transcription regulatory region DNA binding)	NA	626	9.5	4	3	3	40.3388	61.1266	67.5288	0.027672	0.0279965	yes
PC-3p-242522_11	TRINITY_DN23364_c0_g3	protein STRUBBELIG-RECEPTOR FAMILY 3 isoform X1 [Medicago truncatula]	SRF3	GO:0004674(protein serine/threonine kinase activity);GO:0004675(transmembrane receptor protein serine/threonine kinase activity);GO:0005524(ATP binding);GO:0005886(plasma membrane);GO:0006468(protein phosphorylation);GO:0007166(cell surface receptor signaling pathway);GO:0007169(transmembrane receptor protein tyrosine kinase signaling pathway);GO:0007623(circadian rhythm);GO:0016021(integral comp…	NA	400	6	4	NA	NA	40.3388	0	0	3.0257e-18	5.71521e-18	yes
PC-3p-242522_11	TRINITY_DN24425_c0_g1	putative pentatricopeptide repeat-containing protein At3g13770, mitochondrial [Medicago truncatula]	PCMP-H53	GO:0005739(mitochondrion);GO:0008270(zinc ion binding)	NA	1954	13.5	NA	NA	4	0	0	33.7644	2.1684e-15	3.13149e-15	yes
PC-3p-242522_11	TRINITY_DN26158_c1_g2	aspartic proteinase PCS1 [Medicago truncatula]	PCS1	GO:0004190(aspartic-type endopeptidase activity);GO:0006508(proteolysis);GO:0030163(protein catabolic process)	NA	649	1	NA	NA	3	0	0	67.5288	4.6985e-30	1.53517e-29	yes
PC-3p-270481_10	TRINITY_DN12734_c0_g1	hypothetical protein GOBAR_AA33653 [Gossypium barbadense]	-	GO:0003674(molecular_function);GO:0005575(cellular_component);GO:0008150(biological_process)	ko03010(Ribosome)	95	8.5	2	2	2	1452.2	1558.73	135.058	0	0	yes
PC-3p-270481_10	TRINITY_DN13030_c1_g6	phosphatidylinositol N-acetylglucosaminyltransferase [Medicago truncatula]	PIGA	GO:0005634(nucleus);GO:0005789(endoplasmic reticulum membrane);GO:0006506(GPI anchor biosynthetic process);GO:0009846(pollen germination);GO:0009860(pollen tube growth);GO:0016021(integral component of membrane);GO:0016757(transferase activity, transferring glycosyl groups);GO:0017176(phosphatidylinositol N-acetylglucosaminyltransferase activity)	ko00563(Glycosylphosphatidylinositol(GPI)-anchor biosynthesis)	186	9	1	NA	NA	161.355	0	0	8.3268e-71	1.57284e-69	yes
PC-3p-270481_10	TRINITY_DN14066_c0_g1	-	-	NA	NA	235	8.5	NA	NA	4	0	0	33.7644	2.1684e-15	3.13149e-15	yes
PC-3p-270481_10	TRINITY_DN14228_c0_g2	S-adenosylmethionine synthase [Medicago truncatula]	SAMS	GO:0004478(methionine adenosyltransferase activity);GO:0005829(cytosol)	ko00270(Cysteine and methionine metabolism)	970	8.5	4	4	4	40.3388	30.5633	33.7644	0.49068	0.491154	yes
PC-3p-270481_10	TRINITY_DN15141_c0_g3	PREDICTED: squamosa promoter-binding-like protein 3 [Lupinus angustifolius]	SPL13	GO:0003677(DNA binding);GO:0003700(DNA binding transcription factor activity);GO:0005634(nucleus);GO:0005737(cytoplasm);GO:0006351(transcription, DNA-templated);GO:0006355(regulation of transcription, DNA-templated);GO:0010321(regulation of vegetative phase change);GO:0046872(metal ion binding)	NA	1971	6.5	2	NA	NA	80.6777	0	0	9.1449e-36	4.07513e-35	yes
PC-3p-270481_10	TRINITY_DN15682_c1_g1	uncharacterized protein LOC11441466 [Medicago truncatula]	-	GO:0003674(molecular_function);GO:0005634(nucleus);GO:0008150(biological_process)	ko00562(Inositol phosphate metabolism);ko04070(Phosphatidylinositol signaling system)	791	6	4	NA	2	40.3388	0	101.293	1.1933e-24	3.06672e-24	yes
PC-3p-270481_10	TRINITY_DN16660_c1_g1	ABC transporter F family member 3 [Medicago truncatula]	ABCF3	GO:0005215(transporter activity);GO:0005524(ATP binding);GO:0005737(cytoplasm);GO:0005829(cytosol);GO:0016887(ATPase activity);GO:0042742(defense response to bacterium);GO:0046686(response to cadmium ion)	NA	549	27	NA	2	NA	0	122.253	0	8.0164e-54	8.78795e-53	yes
PC-3p-270481_10	TRINITY_DN16801_c0_g1	methylthioribose kinase [Medicago truncatula]	MTK	GO:0005524(ATP binding);GO:0005829(cytosol);GO:0016310(phosphorylation);GO:0019509(L-methionine salvage from methylthioadenosine);GO:0042802(identical protein binding);GO:0046522(S-methyl-5-thioribose kinase activity);GO:0071281(cellular response to iron ion);GO:0071369(cellular response to ethylene stimulus);GO:0071732(cellular response to nitric oxide)	ko00270(Cysteine and methionine metabolism)	1453	10.5	NA	4	NA	0	30.5633	0	5.326e-14	6.30988e-14	yes
PC-3p-270481_10	TRINITY_DN17407_c1_g3	-	-	NA	NA	620	9.5	2	NA	NA	121.017	0	0	2.761e-53	2.58192e-52	yes
PC-3p-270481_10	TRINITY_DN17572_c0_g1	protein phosphatase 2C 77 [Medicago truncatula]	ABI1	GO:0004721(phosphoprotein phosphatase activity);GO:0004722(protein serine/threonine phosphatase activity);GO:0005509(calcium ion binding);GO:0005515(protein binding);GO:0005634(nucleus);GO:0005737(cytoplasm);GO:0005886(plasma membrane);GO:0006470(protein dephosphorylation);GO:0008287(protein serine/threonine phosphatase complex);GO:0009408(response to heat);GO:0009409(response to cold);GO:0009737…	ko04016(MAPK signaling pathway - plant);ko04075(Plant hormone signal transduction)	1067	12.5	NA	4	2	0	30.5633	135.058	3.4804e-40	1.97223e-39	yes
PC-3p-270481_10	TRINITY_DN17715_c0_g1	auxin-responsive protein IAA11 [Medicago truncatula]	IAA11	GO:0003700(DNA binding transcription factor activity);GO:0005515(protein binding);GO:0005634(nucleus);GO:0006351(transcription, DNA-templated);GO:0006355(regulation of transcription, DNA-templated);GO:0009506(plasmodesma);GO:0009733(response to auxin);GO:0009734(auxin-activated signaling pathway);GO:0016021(integral component of membrane)	ko04075(Plant hormone signal transduction)	771	6	3	2	2	80.6777	213.943	168.822	1.2089e-13	1.43073e-13	yes
PC-3p-270481_10	TRINITY_DN17999_c0_g1	heptahelical transmembrane protein 1 [Medicago truncatula]	HHP1	GO:0009725(response to hormone)	NA	1368	6	4	2	4	40.3388	91.6898	33.7644	1.2433e-08	1.34791e-08	yes
PC-3p-270481_10	TRINITY_DN18134_c0_g1	putative CRAL-TRIO lipid binding domain, CRAL/TRIO domain-containing protein [Medicago truncatula]	SEC14L4	GO:0005215(transporter activity);GO:0005737(cytoplasm);GO:0005794(Golgi apparatus);GO:0006810(transport)	NA	635	8	NA	NA	2	0	0	67.5288	4.6985e-30	1.53517e-29	yes
PC-3p-270481_10	TRINITY_DN19201_c1_g2	uncharacterized protein LOC101503254 [Cicer arietinum]	ylbH	GO:0008168(methyltransferase activity);GO:0032259(methylation)	NA	663	8	NA	4	4	0	30.5633	33.7644	9.1976e-08	9.66516e-08	yes
PC-3p-270481_10	TRINITY_DN19376_c1_g2	blue copper protein [Medicago truncatula]	-	GO:0046658(anchored component of plasma membrane)	NA	329	6.5	3	4	4	121.017	30.5633	33.7644	3.0333e-19	6.99095e-19	yes
PC-3p-270481_10	TRINITY_DN19945_c0_g2	dof zinc finger protein DOF1.4 [Medicago truncatula]	DOF1.4	GO:0003677(DNA binding);GO:0003700(DNA binding transcription factor activity);GO:0005634(nucleus);GO:0006351(transcription, DNA-templated);GO:0006355(regulation of transcription, DNA-templated);GO:0046872(metal ion binding)	NA	1513	5	NA	NA	2	0	0	101.293	1.0173e-44	7.03524e-44	yes
PC-3p-270481_10	TRINITY_DN20811_c0_g1	putative PAP-specific phosphatase, mitochondrial isoform X1 [Medicago truncatula]	At4g05090	GO:0000287(magnesium ion binding);GO:0005737(cytoplasm);GO:0008441(3'(2'),5'-bisphosphate nucleotidase activity)	ko00920(Sulfur metabolism)	788	7.5	NA	4	NA	0	30.5633	0	5.326e-14	6.30988e-14	yes
PC-3p-270481_10	TRINITY_DN21013_c1_g1	CTL-like protein DDB_G0274487 [Medicago truncatula]	DDB_G0274487	GO:0005886(plasma membrane);GO:0008150(biological_process);GO:0009507(chloroplast);GO:0016021(integral component of membrane)	NA	1709	9	4	2	2	40.3388	61.1266	101.293	6.7584e-07	7.07455e-07	yes
PC-3p-270481_10	TRINITY_DN22143_c0_g10	ATP-dependent DNA helicase 2 subunit KU80 isoform X1 [Medicago truncatula]	KU80	GO:0000723(telomere maintenance);GO:0000784(nuclear chromosome, telomeric region);GO:0003684(damaged DNA binding);GO:0003690(double-stranded DNA binding);GO:0004003(ATP-dependent DNA helicase activity);GO:0006303(double-strand break repair via nonhomologous end joining);GO:0006310(DNA recombination);GO:0032508(DNA duplex unwinding);GO:0042162(telomeric DNA binding);GO:0043564(Ku70:Ku80 complex);G…	ko03450(Non-homologous end-joining)	1090	8	NA	NA	4	0	0	33.7644	2.1684e-15	3.13149e-15	yes
PC-3p-270481_10	TRINITY_DN23311_c0_g1	protein NRT1/ PTR FAMILY 3.1 [Medicago truncatula]	NPF3.1	GO:0005215(transporter activity);GO:0005886(plasma membrane);GO:0006857(oligopeptide transport);GO:0010336(gibberellic acid homeostasis);GO:0016020(membrane);GO:0016021(integral component of membrane);GO:0022857(transmembrane transporter activity);GO:0042128(nitrate assimilation);GO:0055085(transmembrane transport);GO:0097708(intracellular vesicle)	NA	1369	6.5	NA	2	NA	0	91.6898	0	1.508e-40	8.68797e-40	yes
PC-3p-270481_10	TRINITY_DN23455_c0_g1	hypothetical protein MtrunA17_Chr1g0187491 [Medicago truncatula]	-	GO:0005634(nucleus);GO:0005829(cytosol);GO:0005886(plasma membrane);GO:0016020(membrane)	NA	2569	10	NA	NA	4	0	0	33.7644	2.1684e-15	3.13149e-15	yes
PC-3p-270481_10	TRINITY_DN24307_c0_g2	cyclic dof factor 2 [Medicago truncatula]	CDF2	GO:0003677(DNA binding);GO:0003700(DNA binding transcription factor activity);GO:0005515(protein binding);GO:0005634(nucleus);GO:0006351(transcription, DNA-templated);GO:0006355(regulation of transcription, DNA-templated);GO:0009908(flower development);GO:0043565(sequence-specific DNA binding);GO:0046872(metal ion binding);GO:0048510(regulation of timing of transition from vegetative to reproduct…	ko04712(Circadian rhythm - plant)	1583	5	NA	4	NA	0	30.5633	0	5.326e-14	6.30988e-14	yes
PC-3p-270481_10	TRINITY_DN24606_c0_g1	putative G-patch domain, R3H domain-containing protein [Medicago truncatula]	tfip11	GO:0003676(nucleic acid binding);GO:0005622(intracellular);GO:0005634(nucleus)	NA	1576	13	NA	NA	4	0	0	33.7644	2.1684e-15	3.13149e-15	yes
PC-3p-270481_10	TRINITY_DN24859_c1_g1	FT-interacting protein 1 [Medicago truncatula]	FTIP1	GO:0005509(calcium ion binding);GO:0005544(calcium-dependent phospholipid binding);GO:0005886(plasma membrane)	ko00270(Cysteine and methionine metabolism);ko00450(Selenocompound metabolism)	2503	6.5	NA	2	NA	0	91.6898	0	1.508e-40	8.68797e-40	yes
PC-3p-270481_10	TRINITY_DN25144_c1_g1	transcription factor bHLH155 [Medicago truncatula]	BHLH155	GO:0004674(protein serine/threonine kinase activity);GO:0005829(cytosol);GO:0006355(regulation of transcription, DNA-templated);GO:0006468(protein phosphorylation);GO:0035556(intracellular signal transduction)	NA	2822	7.5	NA	NA	2	0	0	135.058	2.2009e-59	2.88805e-58	yes
PC-3p-270481_10	TRINITY_DN25204_c1_g1	two-component response regulator-APRR2-like protein [Medicago truncatula]	APRR2	GO:0000156(phosphorelay response regulator activity);GO:0000160(phosphorelay signal transduction system);GO:0003677(DNA binding);GO:0003700(DNA binding transcription factor activity);GO:0005515(protein binding);GO:0005634(nucleus);GO:0006351(transcription, DNA-templated);GO:0006355(regulation of transcription, DNA-templated);GO:0007623(circadian rhythm)	ko04075(Plant hormone signal transduction)	1979	5.5	4	2	4	40.3388	61.1266	33.7644	0.010824	0.0109988	yes
PC-3p-270481_10	TRINITY_DN25744_c1_g4	protein INVOLVED IN DE NOVO 2 [Medicago truncatula]	IDN2	GO:0004526(ribonuclease P activity);GO:0005655(nucleolar ribonuclease P complex);GO:0090502(RNA phosphodiester bond hydrolysis, endonucleolytic)	NA	1220	8	2	2	3	121.017	122.253	67.5288	8.0775e-05	8.33736e-05	yes
PC-3p-39042_145	TRINITY_DN12103_c0_g1	heat shock protein 15.9 [Medicago sativa]	HSP15.7	GO:0000302(response to reactive oxygen species);GO:0003674(molecular_function);GO:0005737(cytoplasm);GO:0005782(peroxisomal matrix);GO:0006457(protein folding);GO:0009408(response to heat)	ko04141(Protein processing in endoplasmic reticulum)	292	7.5	NA	4	NA	0	30.5633	0	5.326e-14	6.30988e-14	yes
PC-3p-39042_145	TRINITY_DN13821_c0_g1	copper-transporting ATPase RAN1 [Medicago truncatula]	RAN1	GO:0005887(integral component of plasma membrane);GO:0043231(intracellular membrane-bounded organelle);GO:0043682(copper-transporting ATPase activity)	ko04016(MAPK signaling pathway - plant)	385	9.5	4	NA	NA	40.3388	0	0	3.0257e-18	5.71521e-18	yes
PC-3p-39042_145	TRINITY_DN16417_c0_g1	auxin-responsive protein SAUR72 [Medicago truncatula]	SAUR72	GO:0003674(molecular_function);GO:0005737(cytoplasm);GO:0007275(multicellular organism development);GO:0009733(response to auxin);GO:0009734(auxin-activated signaling pathway);GO:0040008(regulation of growth)	ko04075(Plant hormone signal transduction)	289	9.5	NA	NA	4	0	0	33.7644	2.1684e-15	3.13149e-15	yes
PC-3p-39042_145	TRINITY_DN17454_c1_g4	hypothetical protein TSUD_73060 [Trifolium subterraneum]	-	NA	NA	90	11.5	4	NA	4	40.3388	0	33.7644	5.8097e-09	6.43576e-09	yes
PC-3p-39042_145	TRINITY_DN18081_c0_g2	pleiotropic drug resistance protein 1 isoform X3 [Medicago truncatula]	ABCG36	GO:0005886(plasma membrane);GO:0016021(integral component of membrane);GO:0042626(ATPase activity, coupled to transmembrane movement of substances)	ko02010(ABC transporters)	788	10	NA	4	NA	0	30.5633	0	5.326e-14	6.30988e-14	yes
PC-3p-39042_145	TRINITY_DN18748_c0_g3	presequence protease 1, chloroplastic/mitochondrial [Medicago truncatula]	PREP2	GO:0004222(metalloendopeptidase activity);GO:0008270(zinc ion binding);GO:0016485(protein processing)	NA	2323	7	NA	NA	4	0	0	33.7644	2.1684e-15	3.13149e-15	yes
PC-3p-39042_145	TRINITY_DN20238_c0_g5	phosphoenolpyruvate carboxykinase (ATP) [Medicago truncatula]	PCKA	GO:0004612(phosphoenolpyruvate carboxykinase (ATP) activity);GO:0005829(cytosol);GO:0006094(gluconeogenesis)	ko00010(Glycolysis / Gluconeogenesis);ko00020(Citrate cycle (TCA cycle));ko00620(Pyruvate metabolism);ko00710(Carbon fixation in photosynthetic organisms)	1161	6.5	NA	NA	2	0	0	67.5288	4.6985e-30	1.53517e-29	yes
PC-3p-39042_145	TRINITY_DN21145_c0_g2	-	-	NA	NA	25	1	4	2	4	40.3388	152.816	33.7644	1.9379e-26	5.15596e-26	yes
PC-3p-39042_145	TRINITY_DN21274_c0_g2	auxin-induced protein AUX28 [Medicago truncatula]	AUX28	GO:0003700(DNA binding transcription factor activity);GO:0005515(protein binding);GO:0005634(nucleus);GO:0006351(transcription, DNA-templated);GO:0006355(regulation of transcription, DNA-templated);GO:0009733(response to auxin);GO:0009734(auxin-activated signaling pathway);GO:0010102(lateral root morphogenesis);GO:0016021(integral component of membrane);GO:0045892(negative regulation of transcrip…	ko04075(Plant hormone signal transduction)	695	9	3	2	3	121.017	366.759	202.586	2.6768e-30	1.07544e-29	yes
PC-3p-39042_145	TRINITY_DN21883_c0_g1	magnesium-protoporphyrin IX monomethyl ester [oxidative] cyclase, chloroplastic [Medicago truncatula]	CRD1	GO:0003677(DNA binding);GO:0005515(protein binding);GO:0009507(chloroplast);GO:0009534(chloroplast thylakoid);GO:0009535(chloroplast thylakoid membrane);GO:0009658(chloroplast organization);GO:0009706(chloroplast inner membrane);GO:0009941(chloroplast envelope);GO:0015979(photosynthesis);GO:0015995(chlorophyll biosynthetic process);GO:0046872(metal ion binding);GO:0048529(magnesium-protoporphyrin…	ko00860(Porphyrin and chlorophyll metabolism)	1656	8	2	3	2	363.05	91.6898	202.586	1.252e-37	6.8857e-37	yes
PC-3p-39042_145	TRINITY_DN23217_c1_g4	hypothetical protein TSUD_204580 [Trifolium subterraneum]	CLPX2	GO:0004176(ATP-dependent peptidase activity);GO:0005524(ATP binding);GO:0005759(mitochondrial matrix);GO:0006508(proteolysis);GO:0030163(protein catabolic process)	NA	1030	17	NA	NA	4	0	0	33.7644	2.1684e-15	3.13149e-15	yes
PC-3p-39042_145	TRINITY_DN23684_c0_g1	putative Seed maturation protein [Medicago truncatula]	-	GO:0003674(molecular_function);GO:0005634(nucleus);GO:0005730(nucleolus);GO:0005737(cytoplasm);GO:0005829(cytosol);GO:0006873(cellular ion homeostasis);GO:0006970(response to osmotic stress);GO:0009414(response to water deprivation);GO:0009737(response to abscisic acid);GO:0009793(embryo development ending in seed dormancy);GO:0009845(seed germination);GO:0010226(response to lithium ion)	NA	281	7	NA	NA	3	0	0	101.293	1.0173e-44	7.03524e-44	yes
PC-3p-39042_145	TRINITY_DN23968_c0_g1	ATP-dependent 6-phosphofructokinase 6 [Medicago truncatula]	PFK3	GO:0003872(6-phosphofructokinase activity);GO:0005524(ATP binding);GO:0005737(cytoplasm);GO:0005829(cytosol);GO:0005945(6-phosphofructokinase complex);GO:0006002(fructose 6-phosphate metabolic process);GO:0006096(glycolytic process);GO:0010053(root epidermal cell differentiation);GO:0046872(metal ion binding)	ko00010(Glycolysis / Gluconeogenesis);ko00030(Pentose phosphate pathway);ko00051(Fructose and mannose metabolism);ko00052(Galactose metabolism);ko03018(RNA degradation)	1141	9	4	NA	NA	40.3388	0	0	3.0257e-18	5.71521e-18	yes
PC-3p-39042_145	TRINITY_DN24124_c0_g1	LOW QUALITY PROTEIN: scarecrow-like protein 23 [Medicago truncatula]	SCL23	GO:0003700(DNA binding transcription factor activity);GO:0005634(nucleus);GO:0006355(regulation of transcription, DNA-templated);GO:0043565(sequence-specific DNA binding);GO:0048366(leaf development);GO:0090610(bundle sheath cell fate specification)	ko04075(Plant hormone signal transduction)	1909	16	NA	NA	4	0	0	33.7644	2.1684e-15	3.13149e-15	yes
PC-3p-39042_145	TRINITY_DN24614_c1_g2	-	-	NA	NA	211	4.5	NA	1	NA	0	61.1266	0	2.8349e-27	7.6679e-27	yes
PC-3p-39042_145	TRINITY_DN24669_c0_g3	U-box domain-containing protein 4 [Medicago truncatula]	PUB14	GO:0005634(nucleus);GO:0005737(cytoplasm)	NA	548	12	NA	2	4	0	305.633	33.7644	0	0	yes
PC-3p-39042_145	TRINITY_DN24709_c0_g2	uncharacterized protein LOC25502118 isoform X1 [Medicago truncatula]	-	NA	NA	1474	11	NA	NA	4	0	0	33.7644	2.1684e-15	3.13149e-15	yes
PC-3p-39042_145	TRINITY_DN24859_c1_g1	FT-interacting protein 1 [Medicago truncatula]	FTIP1	GO:0005509(calcium ion binding);GO:0005544(calcium-dependent phospholipid binding);GO:0005886(plasma membrane)	ko00270(Cysteine and methionine metabolism);ko00450(Selenocompound metabolism)	2010	5.5	NA	4	NA	0	30.5633	0	5.326e-14	6.30988e-14	yes
PC-3p-39042_145	TRINITY_DN25123_c0_g1	tyrosine-sulfated glycopeptide receptor 1 [Medicago truncatula]	PSY1R	GO:0001653(peptide receptor activity);GO:0004674(protein serine/threonine kinase activity);GO:0004888(transmembrane signaling receptor activity);GO:0005515(protein binding);GO:0005524(ATP binding);GO:0005886(plasma membrane);GO:0006468(protein phosphorylation);GO:0007169(transmembrane receptor protein tyrosine kinase signaling pathway);GO:0009611(response to wounding);GO:0009826(unidimensional ce…	ko04075(Plant hormone signal transduction)	3183	9	NA	4	NA	0	30.5633	0	5.326e-14	6.30988e-14	yes
PC-3p-39042_145	TRINITY_DN25293_c1_g2	putative reverse transcriptase, RNA-dependent DNA polymerase [Medicago truncatula]	PRB1	GO:0003674(molecular_function);GO:0005576(extracellular region);GO:0008150(biological_process)	ko04016(MAPK signaling pathway - plant);ko04075(Plant hormone signal transduction);ko04626(Plant-pathogen interaction)	367	0	3	NA	NA	80.6777	0	0	9.1449e-36	4.07513e-35	yes
PC-3p-39042_145	TRINITY_DN25330_c0_g2	transcription factor UNE12 isoform X2 [Medicago truncatula]	UNE12	GO:0001046(core promoter sequence-specific DNA binding);GO:0001228(transcriptional activator activity, RNA polymerase II transcription regulatory region sequence-specific DNA binding);GO:0005634(nucleus);GO:0006366(transcription by RNA polymerase II)	ko04075(Plant hormone signal transduction);ko04712(Circadian rhythm - plant)	487	10	NA	2	4	0	61.1266	33.7644	1.3397e-13	1.5644e-13	yes
PC-3p-39042_145	TRINITY_DN25839_c0_g2	ABC transporter B family protein [Medicago truncatula]	ABCB26	GO:0016021(integral component of membrane);GO:0042626(ATPase activity, coupled to transmembrane movement of substances);GO:0055085(transmembrane transport)	ko02010(ABC transporters)	1813	10.5	NA	NA	3	0	0	67.5288	4.6985e-30	1.53517e-29	yes
PC-3p-39042_145	TRINITY_DN26418_c1_g2	E3 ubiquitin-protein ligase UPL1 [Medicago truncatula]	UPL1	GO:0004842(ubiquitin-protein transferase activity);GO:0005634(nucleus);GO:0005737(cytoplasm)	ko04120(Ubiquitin mediated proteolysis)	971	10	NA	NA	2	0	0	67.5288	4.6985e-30	1.53517e-29	yes
PC-3p-54_81480	TRINITY_DN12183_c0_g1	pentatricopeptide repeat-containing protein At4g38150 [Medicago truncatula]	-	GO:0009507(chloroplast);GO:0015391(nucleobase:cation symporter activity)	NA	291	9	NA	4	NA	0	30.5633	0	5.326e-14	6.30988e-14	yes
PC-3p-54_81480	TRINITY_DN13194_c0_g1	uncharacterized protein LOC25500436 isoform X1 [Medicago truncatula]	rbpms2	GO:0003723(RNA binding);GO:0005634(nucleus);GO:0008150(biological_process)	NA	220	8.5	NA	4	NA	0	30.5633	0	5.326e-14	6.30988e-14	yes
PC-3p-54_81480	TRINITY_DN13252_c1_g1	transmembrane protein, putative [Medicago truncatula]	-	NA	NA	198	8	NA	4	NA	0	30.5633	0	5.326e-14	6.30988e-14	yes
PC-3p-54_81480	TRINITY_DN13723_c0_g2	heavy metal-associated isoprenylated plant protein 7 [Medicago truncatula]	HIPP07	GO:0005737(cytoplasm);GO:0030001(metal ion transport);GO:0046914(transition metal ion binding);GO:0046916(cellular transition metal ion homeostasis)	NA	475	5.5	NA	2	NA	0	61.1266	0	2.8349e-27	7.6679e-27	yes
PC-3p-54_81480	TRINITY_DN14471_c0_g4	uncharacterized protein LOC11417325 [Medicago truncatula]	-	GO:0003690(double-stranded DNA binding);GO:0006355(regulation of transcription, DNA-templated);GO:0009507(chloroplast);GO:0016020(membrane)	NA	675	5.5	4	NA	NA	40.3388	0	0	3.0257e-18	5.71521e-18	yes
PC-3p-54_81480	TRINITY_DN14869_c0_g1	uncharacterized protein LOC25490238 [Medicago truncatula]	-	GO:0004176(ATP-dependent peptidase activity);GO:0006508(proteolysis);GO:0008233(peptidase activity);GO:0009507(chloroplast)	NA	398	6	2	NA	NA	121.017	0	0	2.761e-53	2.58192e-52	yes
PC-3p-54_81480	TRINITY_DN14871_c1_g1	hypothetical protein L195_g028956 [Trifolium pratense]	At4g29420	GO:0003674(molecular_function);GO:0005634(nucleus);GO:0008150(biological_process)	NA	270	7	NA	4	NA	0	30.5633	0	5.326e-14	6.30988e-14	yes
PC-3p-54_81480	TRINITY_DN15040_c0_g2	glyceraldehyde-3-phosphate dehydrogenase A, chloroplastic [Medicago truncatula]	GAPA1	GO:0005515(protein binding);GO:0005829(cytosol);GO:0006006(glucose metabolic process);GO:0006096(glycolytic process);GO:0009409(response to cold);GO:0009416(response to light stimulus);GO:0009507(chloroplast);GO:0009535(chloroplast thylakoid membrane);GO:0009570(chloroplast stroma);GO:0009744(response to sucrose);GO:0009941(chloroplast envelope);GO:0010319(stromule);GO:0016020(membrane);GO:001925…	ko00710(Carbon fixation in photosynthetic organisms)	328	9	3	2	3	80.6777	244.506	135.058	1.9346e-20	4.67836e-20	yes
PC-3p-54_81480	TRINITY_DN15406_c0_g1	60S ribosomal protein L26-2 [Medicago truncatula]	RPL26B	GO:0002181(cytoplasmic translation);GO:0003735(structural constituent of ribosome);GO:0022625(cytosolic large ribosomal subunit);GO:0042273(ribosomal large subunit biogenesis)	ko03010(Ribosome)	140	9.5	2	2	3	201.694	122.253	67.5288	7.1072e-16	1.28371e-15	yes
PC-3p-54_81480	TRINITY_DN15926_c1_g4	uncharacterized protein LOC25482490 [Medicago truncatula]	-	GO:0003674(molecular_function);GO:0005774(vacuolar membrane);GO:0005783(endoplasmic reticulum);GO:0005886(plasma membrane);GO:0008150(biological_process);GO:0016021(integral component of membrane)	NA	252	12	4	NA	4	40.3388	0	33.7644	5.8097e-09	6.43576e-09	yes
PC-3p-54_81480	TRINITY_DN15929_c0_g2	alanine--glyoxylate aminotransferase 2 homolog 1, mitochondrial [Medicago truncatula]	AGT2	GO:0005739(mitochondrion);GO:0008453(alanine-glyoxylate transaminase activity);GO:0030170(pyridoxal phosphate binding);GO:0042802(identical protein binding)	ko00250(Alanine, aspartate and glutamate metabolism);ko00260(Glycine, serine and threonine metabolism);ko00270(Cysteine and methionine metabolism);ko00280(Valine, leucine and isoleucine degradation)	403	5	2	NA	NA	201.694	0	0	0	0	yes
PC-3p-54_81480	TRINITY_DN16009_c0_g5	ELMO domain-containing protein B isoform X1 [Medicago truncatula]	ANTR3	GO:0003674(molecular_function);GO:0005737(cytoplasm)	NA	193	5	2	NA	NA	161.355	0	0	8.3268e-71	1.57284e-69	yes
PC-3p-54_81480	TRINITY_DN16018_c1_g1	DNA polymerase delta catalytic subunit [Medicago truncatula]	POLD1	GO:0006287(base-excision repair, gap-filling);GO:0006297(nucleotide-excision repair, DNA gap filling);GO:0008296(3'-5'-exodeoxyribonuclease activity);GO:0043625(delta DNA polymerase complex);GO:0045004(DNA replication proofreading)	ko00230(Purine metabolism);ko00240(Pyrimidine metabolism);ko03030(DNA replication);ko03410(Base excision repair);ko03420(Nucleotide excision repair);ko03430(Mismatch repair);ko03440(Homologous recombination)	231	5	4	NA	NA	40.3388	0	0	3.0257e-18	5.71521e-18	yes
PC-3p-54_81480	TRINITY_DN16383_c0_g1	uncharacterized protein LOC25495874 [Medicago truncatula]	yabD	GO:0004536(deoxyribonuclease activity);GO:0005634(nucleus);GO:0016788(hydrolase activity, acting on ester bonds)	NA	220	7.5	NA	NA	4	0	0	33.7644	2.1684e-15	3.13149e-15	yes
PC-3p-54_81480	TRINITY_DN16626_c0_g1	uncharacterized protein LOC11442060 [Medicago truncatula]	-	GO:0003674(molecular_function);GO:0005575(cellular_component);GO:0008150(biological_process)	NA	982	8	4	NA	NA	40.3388	0	0	3.0257e-18	5.71521e-18	yes
PC-3p-54_81480	TRINITY_DN16657_c0_g1	F-box protein interaction domain protein [Medicago truncatula]	FBX11	GO:0004842(ubiquitin-protein transferase activity);GO:0019005(SCF ubiquitin ligase complex);GO:0031146(SCF-dependent proteasomal ubiquitin-dependent protein catabolic process)	NA	229	4	NA	4	NA	0	30.5633	0	5.326e-14	6.30988e-14	yes
PC-3p-54_81480	TRINITY_DN17262_c0_g3	uridine 5-monophosphate synthase-like protein [Medicago truncatula]	PYR5-6	GO:0004588(orotate phosphoribosyltransferase activity);GO:0004590(orotidine-5'-phosphate decarboxylase activity);GO:0005737(cytoplasm);GO:0005829(cytosol);GO:0006207('de novo' pyrimidine nucleobase biosynthetic process);GO:0009116(nucleoside metabolic process);GO:0009220(pyrimidine ribonucleotide biosynthetic process);GO:0016036(cellular response to phosphate starvation);GO:0044205('de novo' UMP …	ko00240(Pyrimidine metabolism)	526	9	NA	4	4	0	30.5633	33.7644	9.1976e-08	9.66516e-08	yes
PC-3p-54_81480	TRINITY_DN17456_c0_g2	probable pectin methyltransferase QUA2 [Medicago truncatula]	QUA2	GO:0005768(endosome);GO:0005774(vacuolar membrane);GO:0005802(trans-Golgi network);GO:0008757(S-adenosylmethionine-dependent methyltransferase activity);GO:0032259(methylation)	NA	367	13	NA	2	NA	0	91.6898	0	1.508e-40	8.68797e-40	yes
PC-3p-54_81480	TRINITY_DN17929_c0_g2	transcription factor MYC2 [Medicago truncatula]	BHLH14	GO:0003677(DNA binding);GO:0003700(DNA binding transcription factor activity);GO:0005515(protein binding);GO:0005634(nucleus);GO:0005737(cytoplasm);GO:0006351(transcription, DNA-templated);GO:0006355(regulation of transcription, DNA-templated);GO:0010629(negative regulation of gene expression);GO:0046983(protein dimerization activity)	ko04016(MAPK signaling pathway - plant);ko04075(Plant hormone signal transduction)	882	8.5	NA	4	NA	0	30.5633	0	5.326e-14	6.30988e-14	yes
PC-3p-54_81480	TRINITY_DN18281_c0_g1	probable ribose-5-phosphate isomerase 3, chloroplastic [Medicago truncatula]	RPI3	GO:0004751(ribose-5-phosphate isomerase activity);GO:0009052(pentose-phosphate shunt, non-oxidative branch);GO:0009507(chloroplast);GO:0009535(chloroplast thylakoid membrane);GO:0009570(chloroplast stroma);GO:0009579(thylakoid);GO:0009735(response to cytokinin);GO:0009941(chloroplast envelope);GO:0019253(reductive pentose-phosphate cycle);GO:0042742(defense response to bacterium)	ko00030(Pentose phosphate pathway);ko00710(Carbon fixation in photosynthetic organisms)	636	9	4	3	NA	40.3388	61.1266	0	3.9437e-13	4.56816e-13	yes
PC-3p-54_81480	TRINITY_DN19144_c0_g1	T-complex protein 1 subunit delta [Medicago truncatula]	CCT4	GO:0005524(ATP binding);GO:0005737(cytoplasm);GO:0005829(cytosol);GO:0006458('de novo' protein folding);GO:0046686(response to cadmium ion);GO:0051082(unfolded protein binding)	NA	647	6	2	2	4	201.694	122.253	33.7644	1.9664e-26	5.22691e-26	yes
PC-3p-54_81480	TRINITY_DN19260_c0_g2	type 2A protein phosphatase-1 [Vicia faba]	PP2A	GO:0004721(phosphoprotein phosphatase activity);GO:0004722(protein serine/threonine phosphatase activity);GO:0005515(protein binding);GO:0005634(nucleus);GO:0005737(cytoplasm);GO:0005777(peroxisome);GO:0005829(cytosol);GO:0005886(plasma membrane);GO:0006470(protein dephosphorylation);GO:0009738(abscisic acid-activated signaling pathway);GO:0009788(negative regulation of abscisic acid-activated si…	ko03015(mRNA surveillance pathway);ko04136(Autophagy - other eukaryotes)	199	7.5	NA	NA	4	0	0	33.7644	2.1684e-15	3.13149e-15	yes
PC-3p-54_81480	TRINITY_DN19403_c0_g2	putative ribonuclease P [Medicago truncatula]	PRORP1	GO:0001682(tRNA 5'-leader removal);GO:0004526(ribonuclease P activity);GO:0005739(mitochondrion);GO:0008033(tRNA processing);GO:0009507(chloroplast);GO:0046872(metal ion binding)	ko03013(RNA transport)	1983	8.5	NA	4	NA	0	30.5633	0	5.326e-14	6.30988e-14	yes
PC-3p-54_81480	TRINITY_DN19724_c0_g1	probable E3 ubiquitin-protein ligase ZFP1 [Medicago truncatula]	MBR1	GO:0043161(proteasome-mediated ubiquitin-dependent protein catabolic process);GO:0061630(ubiquitin protein ligase activity)	NA	43	9	NA	NA	2	0	0	67.5288	4.6985e-30	1.53517e-29	yes
PC-3p-54_81480	TRINITY_DN20665_c0_g3	hypothetical protein MtrunA17_Chr2g0298661 [Medicago truncatula]	-	GO:0005515(protein binding);GO:0005634(nucleus);GO:0005783(endoplasmic reticulum);GO:0005886(plasma membrane);GO:0016021(integral component of membrane);GO:0036503(ERAD pathway)	NA	196	6.5	2	NA	NA	80.6777	0	0	9.1449e-36	4.07513e-35	yes
PC-3p-54_81480	TRINITY_DN20779_c0_g1	heavy metal-associated isoprenylated plant protein 7 [Medicago truncatula]	HIPP07	GO:0005737(cytoplasm);GO:0030001(metal ion transport);GO:0046914(transition metal ion binding);GO:0046916(cellular transition metal ion homeostasis)	NA	415	5.5	4	NA	4	40.3388	0	33.7644	5.8097e-09	6.43576e-09	yes
PC-3p-54_81480	TRINITY_DN21418_c0_g1	RNA-binding protein 34 [Medicago truncatula]	NOP12	GO:0003676(nucleic acid binding);GO:0003723(RNA binding);GO:0005737(cytoplasm)	NA	223	13	NA	4	NA	0	30.5633	0	5.326e-14	6.30988e-14	yes
PC-3p-54_81480	TRINITY_DN21487_c0_g1	high mobility group (HMG)-box protein [Medicago truncatula]	-	GO:0000785(chromatin);GO:0003677(DNA binding);GO:0003682(chromatin binding);GO:0003700(DNA binding transcription factor activity);GO:0005634(nucleus);GO:0005829(cytosol);GO:0006333(chromatin assembly or disassembly);GO:0030527(structural constituent of chromatin)	NA	241	12	3	3	3	201.694	550.139	506.466	4.7106e-38	2.61726e-37	yes
PC-3p-54_81480	TRINITY_DN21585_c0_g6	F-box/kelch-repeat protein At3g23880-like [Cicer arietinum]	-	GO:0004842(ubiquitin-protein transferase activity);GO:0019005(SCF ubiquitin ligase complex);GO:0031146(SCF-dependent proteasomal ubiquitin-dependent protein catabolic process)	NA	239	4	4	4	4	40.3388	30.5633	33.7644	0.49068	0.491154	yes
PC-3p-54_81480	TRINITY_DN21777_c0_g1	chorismate synthase 1, chloroplastic [Medicago truncatula]	CS1	GO:0004107(chorismate synthase activity);GO:0005829(cytosol);GO:0009073(aromatic amino acid family biosynthetic process);GO:0009423(chorismate biosynthetic process);GO:0010181(FMN binding)	ko00400(Phenylalanine, tyrosine and tryptophan biosynthesis)	395	3	2	2	NA	242.033	122.253	0	4.1059e-53	3.82702e-52	yes
PC-3p-54_81480	TRINITY_DN22136_c0_g1	TBC1 domain family member 5 homolog A isoform X1 [Medicago truncatula]	TBC1D5	GO:0005096(GTPase activator activity);GO:0005776(autophagosome);GO:0006886(intracellular protein transport);GO:0006914(autophagy);GO:0010008(endosome membrane);GO:0017137(Rab GTPase binding);GO:0031338(regulation of vesicle fusion);GO:0042594(response to starvation);GO:0090630(activation of GTPase activity)	NA	434	8.5	4	NA	NA	40.3388	0	0	3.0257e-18	5.71521e-18	yes
PC-3p-54_81480	TRINITY_DN22875_c1_g3	-	-	NA	NA	35	2	3	0	2	80.6777	641.829	303.88	0	0	yes
PC-3p-54_81480	TRINITY_DN23393_c0_g1	protein phosphatase PP2A regulatory subunit A [Medicago truncatula]	PP2AA2	GO:0005515(protein binding);GO:0005634(nucleus);GO:0005777(peroxisome);GO:0005829(cytosol);GO:0005886(plasma membrane);GO:0019888(protein phosphatase regulator activity);GO:0042325(regulation of phosphorylation);GO:0046686(response to cadmium ion)	ko03015(mRNA surveillance pathway)	1744	11.5	4	2	2	40.3388	152.816	236.351	4.4389e-30	1.53517e-29	yes
PC-3p-54_81480	TRINITY_DN23393_c0_g3	transmembrane protein, putative [Medicago truncatula]	-	NA	NA	256	5	NA	NA	4	0	0	33.7644	2.1684e-15	3.13149e-15	yes
PC-3p-54_81480	TRINITY_DN24339_c0_g2	kinesin-like protein KIN-14J isoform X1 [Medicago truncatula]	KIN14J	GO:0003777(microtubule motor activity);GO:0005871(kinesin complex);GO:0007018(microtubule-based movement);GO:0016887(ATPase activity)	NA	3020	8	NA	4	NA	0	30.5633	0	5.326e-14	6.30988e-14	yes
PC-3p-54_81480	TRINITY_DN24541_c0_g1	brassinosteroid LRR receptor kinase [Medicago truncatula]	-	GO:0004672(protein kinase activity);GO:0004674(protein serine/threonine kinase activity);GO:0004714(transmembrane receptor protein tyrosine kinase activity);GO:0005496(steroid binding);GO:0005515(protein binding);GO:0005524(ATP binding);GO:0005768(endosome);GO:0005886(plasma membrane);GO:0009506(plasmodesma);GO:0009729(detection of brassinosteroid stimulus);GO:0009742(brassinosteroid mediated sig…	ko04075(Plant hormone signal transduction)	2505	15	4	NA	NA	40.3388	0	0	3.0257e-18	5.71521e-18	yes
PC-3p-54_81480	TRINITY_DN24837_c0_g1	autophagy-related protein 9 isoform X2 [Medicago truncatula]	ATG9	GO:0000045(autophagosome assembly);GO:0000407(phagophore assembly site);GO:0000422(autophagy of mitochondrion);GO:0005776(autophagosome);GO:0034497(protein localization to phagophore assembly site);GO:0034727(piecemeal microautophagy of the nucleus);GO:0044805(late nucleophagy)	ko04136(Autophagy - other eukaryotes)	1862	7.5	NA	NA	4	0	0	33.7644	2.1684e-15	3.13149e-15	yes
PC-3p-54_81480	TRINITY_DN25233_c0_g8	F-box/kelch-repeat protein At3g06240 [Medicago truncatula]	At3g06240	GO:0004842(ubiquitin-protein transferase activity);GO:0019005(SCF ubiquitin ligase complex);GO:0031146(SCF-dependent proteasomal ubiquitin-dependent protein catabolic process)	NA	168	2	0	0	0	1129.49	764.082	607.759	4.2224e-38	2.3483e-37	yes
PC-3p-58648_87	TRINITY_DN13359_c0_g1	G-rich sequence factor 1 [Medicago truncatula]	HNRNPF	GO:0003723(RNA binding);GO:0005634(nucleus);GO:0008150(biological_process)	NA	729	4.5	NA	NA	4	0	0	33.7644	2.1684e-15	3.13149e-15	yes
PC-3p-58648_87	TRINITY_DN13978_c0_g1	probable protein phosphatase 2C 11 [Medicago truncatula]	At1g43900	GO:0004722(protein serine/threonine phosphatase activity);GO:0005739(mitochondrion);GO:0006470(protein dephosphorylation);GO:0016021(integral component of membrane);GO:0046872(metal ion binding)	NA	148	15	NA	4	NA	0	30.5633	0	5.326e-14	6.30988e-14	yes
PC-3p-58648_87	TRINITY_DN14003_c0_g2	hypothetical protein TSUD_276040 [Trifolium subterraneum]	-	NA	NA	342	14.5	NA	2	NA	0	91.6898	0	1.508e-40	8.68797e-40	yes
PC-3p-58648_87	TRINITY_DN17962_c0_g5	BTB/POZ domain-containing protein NPY5 [Medicago truncatula]	NPY2	GO:0005886(plasma membrane);GO:0009416(response to light stimulus);GO:0009958(positive gravitropism);GO:0016567(protein ubiquitination);GO:0071944(cell periphery)	ko03050(Proteasome)	1750	11.5	2	NA	NA	121.017	0	0	2.761e-53	2.58192e-52	yes
PC-3p-58648_87	TRINITY_DN18547_c0_g1	cytokinin dehydrogenase 7 [Medicago truncatula]	CKX7	GO:0005576(extracellular region);GO:0009823(cytokinin catabolic process);GO:0016491(oxidoreductase activity);GO:0016614(oxidoreductase activity, acting on CH-OH group of donors);GO:0019139(cytokinin dehydrogenase activity);GO:0050660(flavin adenine dinucleotide binding);GO:0055114(oxidation-reduction process)	ko00908(Zeatin biosynthesis)	515	18.5	4	NA	NA	40.3388	0	0	3.0257e-18	5.71521e-18	yes
PC-3p-58648_87	TRINITY_DN18592_c0_g1	uncharacterized protein LOC11431884 [Medicago truncatula]	-	GO:0005737(cytoplasm);GO:0008757(S-adenosylmethionine-dependent methyltransferase activity);GO:0032259(methylation)	NA	1664	18	NA	NA	2	0	0	67.5288	4.6985e-30	1.53517e-29	yes
PC-3p-58648_87	TRINITY_DN18635_c0_g1	actin-related protein 5 isoform X1 [Medicago truncatula]	ARP5	GO:0003674(molecular_function);GO:0005829(cytosol);GO:0031011(Ino80 complex);GO:0043044(ATP-dependent chromatin remodeling);GO:0060303(regulation of nucleosome density)	NA	1611	8	4	NA	4	40.3388	0	33.7644	5.8097e-09	6.43576e-09	yes
PC-3p-58648_87	TRINITY_DN18744_c0_g1	FT-interacting protein 1 [Medicago truncatula]	FTIP1	GO:0005509(calcium ion binding);GO:0005544(calcium-dependent phospholipid binding);GO:0005886(plasma membrane)	ko00270(Cysteine and methionine metabolism);ko00450(Selenocompound metabolism)	2421	9.5	4	NA	NA	40.3388	0	0	3.0257e-18	5.71521e-18	yes
PC-3p-58648_87	TRINITY_DN18905_c0_g3	hypothetical protein Ahy_B06g082164 [Arachis hypogaea]	-	GO:0009536(plastid)	ko00190(Oxidative phosphorylation);ko00195(Photosynthesis)	910	7.5	2	2	2	13069.8	5287.45	1823.28	0	0	yes
PC-3p-58648_87	TRINITY_DN18998_c0_g1	30S ribosomal protein S1, chloroplastic [Medicago truncatula]	RPS1	GO:0003723(RNA binding);GO:0003729(mRNA binding);GO:0005739(mitochondrion);GO:0005840(ribosome);GO:0009507(chloroplast);GO:0009570(chloroplast stroma);GO:0009579(thylakoid);GO:0009735(response to cytokinin);GO:0016020(membrane)	ko03010(Ribosome)	1255	7.5	NA	3	3	0	61.1266	135.058	4.196e-31	1.68878e-30	yes
PC-3p-58648_87	TRINITY_DN19169_c0_g1	BRCA1-associated protein isoform X1 [Medicago truncatula]	BRAP	GO:0000151(ubiquitin ligase complex);GO:0004842(ubiquitin-protein transferase activity);GO:0016567(protein ubiquitination);GO:0043130(ubiquitin binding)	NA	802	8.5	4	2	4	40.3388	122.253	33.7644	7.4366e-17	1.37304e-16	yes
PC-3p-58648_87	TRINITY_DN19220_c0_g2	putative dipeptidyl-peptidase IV transcription factor WD40-like family [Medicago truncatula]	dap4	GO:0005829(cytosol);GO:0005886(plasma membrane);GO:0006508(proteolysis);GO:0008236(serine-type peptidase activity);GO:0016020(membrane);GO:0016021(integral component of membrane)	NA	1585	4.5	4	NA	NA	40.3388	0	0	3.0257e-18	5.71521e-18	yes
PC-3p-58648_87	TRINITY_DN19422_c0_g1	RING-H2 finger protein ATL2 [Medicago truncatula]	ATL2	GO:0005634(nucleus);GO:0006952(defense response);GO:0008270(zinc ion binding);GO:0010200(response to chitin);GO:0016021(integral component of membrane);GO:0016567(protein ubiquitination);GO:0043161(proteasome-mediated ubiquitin-dependent protein catabolic process);GO:0046872(metal ion binding);GO:0061630(ubiquitin protein ligase activity)	NA	395	7	4	NA	NA	40.3388	0	0	3.0257e-18	5.71521e-18	yes
PC-3p-58648_87	TRINITY_DN19575_c0_g4	calcium-dependent protein kinase 30 [Medicago truncatula]	CPK10	GO:0004683(calmodulin-dependent protein kinase activity);GO:0005516(calmodulin binding);GO:0005634(nucleus);GO:0005737(cytoplasm);GO:0005886(plasma membrane);GO:0009738(abscisic acid-activated signaling pathway);GO:0009931(calcium-dependent protein serine/threonine kinase activity);GO:0018105(peptidyl-serine phosphorylation);GO:0035556(intracellular signal transduction);GO:0046777(protein autopho…	ko04626(Plant-pathogen interaction)	110	8	NA	NA	4	0	0	33.7644	2.1684e-15	3.13149e-15	yes
PC-3p-58648_87	TRINITY_DN19701_c0_g1	protein EXORDIUM-like 5 [Medicago truncatula]	EXL5	GO:0005576(extracellular region);GO:0005615(extracellular space);GO:0006629(lipid metabolic process);GO:0016298(lipase activity);GO:0048046(apoplast)	NA	835	10.5	NA	NA	4	0	0	33.7644	2.1684e-15	3.13149e-15	yes
PC-3p-58648_87	TRINITY_DN19884_c0_g1	UDP-glucosyltransferase 73B2 [Medicago truncatula]	CBSX2	GO:0005623(cell);GO:0009507(chloroplast);GO:0009570(chloroplast stroma);GO:0045454(cell redox homeostasis)	ko00906(Carotenoid biosynthesis)	925	18.5	NA	4	NA	0	30.5633	0	5.326e-14	6.30988e-14	yes
PC-3p-58648_87	TRINITY_DN20308_c1_g1	putative molybdenum cofactor sulfurtransferase [Medicago truncatula]	ABA3	GO:0005737(cytoplasm);GO:0006777(Mo-molybdopterin cofactor biosynthetic process);GO:0006970(response to osmotic stress);GO:0008265(Mo-molybdopterin cofactor sulfurase activity);GO:0009000(selenocysteine lyase activity);GO:0009408(response to heat);GO:0009409(response to cold);GO:0009651(response to salt stress);GO:0009688(abscisic acid biosynthetic process);GO:0009734(auxin-activated signaling pa…	ko00790(Folate biosynthesis)	461	9	4	NA	NA	40.3388	0	0	3.0257e-18	5.71521e-18	yes
PC-3p-58648_87	TRINITY_DN20982_c0_g1	uncharacterized protein At4g00950 [Medicago truncatula]	-	GO:0003674(molecular_function);GO:0005634(nucleus);GO:0008150(biological_process)	NA	184	6.5	NA	4	NA	0	30.5633	0	5.326e-14	6.30988e-14	yes
PC-3p-58648_87	TRINITY_DN21209_c0_g4	PREDICTED: zinc finger CCCH domain-containing protein 69 isoform X1 [Prunus mume]	MKRN	GO:0003676(nucleic acid binding);GO:0003677(DNA binding);GO:0005634(nucleus);GO:0008270(zinc ion binding);GO:0016567(protein ubiquitination);GO:0016740(transferase activity);GO:0046872(metal ion binding)	NA	145	10	2	NA	NA	80.6777	0	0	9.1449e-36	4.07513e-35	yes
PC-3p-58648_87	TRINITY_DN21696_c0_g4	chalcone synthase [Medicago truncatula]	CHS	GO:0009715(chalcone biosynthetic process);GO:0016210(naringenin-chalcone synthase activity);GO:0034081(polyketide synthase complex);GO:1901696(cannabinoid biosynthetic process)	ko00941(Flavonoid biosynthesis);ko04712(Circadian rhythm - plant)	1108	7	2	2	2	605.083	1314.22	1012.93	4.6077e-57	5.87044e-56	yes
PC-3p-58648_87	TRINITY_DN22567_c0_g2	uncharacterized protein LOC11446781 [Medicago truncatula]	-	GO:0004222(metalloendopeptidase activity);GO:0005524(ATP binding);GO:0006508(proteolysis);GO:0009507(chloroplast);GO:0042651(thylakoid membrane);GO:0048366(leaf development)	NA	292	9.5	NA	NA	2	0	0	67.5288	4.6985e-30	1.53517e-29	yes
PC-3p-58648_87	TRINITY_DN22601_c0_g1	uncharacterized protein LOC25495896 [Medicago truncatula]	-	GO:0003674(molecular_function);GO:0005634(nucleus);GO:0008150(biological_process);GO:0031011(Ino80 complex)	NA	2661	7	NA	NA	2	0	0	67.5288	4.6985e-30	1.53517e-29	yes
PC-3p-58648_87	TRINITY_DN22629_c0_g1	arginine/serine-rich splicing factor [Medicago truncatula]	-	NA	NA	157	10	NA	3	NA	0	61.1266	0	2.8349e-27	7.6679e-27	yes
PC-3p-58648_87	TRINITY_DN22686_c0_g1	O-fucosyltransferase 9 [Medicago truncatula]	At1g04910	GO:0005794(Golgi apparatus);GO:0006004(fucose metabolic process);GO:0006486(protein glycosylation);GO:0016021(integral component of membrane);GO:0016757(transferase activity, transferring glycosyl groups)	NA	503	5.5	NA	4	NA	0	30.5633	0	5.326e-14	6.30988e-14	yes
PC-3p-58648_87	TRINITY_DN22907_c0_g3	rhomboid-like protein 20 [Medicago truncatula]	RBL20	GO:0004252(serine-type endopeptidase activity);GO:0008150(biological_process);GO:0016021(integral component of membrane)	NA	832	5	4	NA	NA	40.3388	0	0	3.0257e-18	5.71521e-18	yes
PC-3p-58648_87	TRINITY_DN23398_c0_g1	DEAD-box ATP-dependent RNA helicase 22 [Medicago truncatula]	RH22	GO:0004004(ATP-dependent RNA helicase activity);GO:0010501(RNA secondary structure unwinding)	ko03040(Spliceosome)	1754	8	4	NA	NA	40.3388	0	0	3.0257e-18	5.71521e-18	yes
PC-3p-58648_87	TRINITY_DN23493_c0_g1	transcription elongation factor (TFIIS) family protein [Medicago truncatula]	MED26C	GO:0006368(transcription elongation from RNA polymerase II promoter);GO:0070449(elongin complex)	NA	714	6	2	NA	NA	80.6777	0	0	9.1449e-36	4.07513e-35	yes
PC-3p-58648_87	TRINITY_DN24557_c0_g2	putative transcription factor C2C2-CO-like family [Medicago truncatula]	CIA2	GO:0005515(protein binding);GO:0005634(nucleus);GO:0006355(regulation of transcription, DNA-templated);GO:0009507(chloroplast);GO:0045036(protein targeting to chloroplast)	NA	1047	6.5	4	NA	2	40.3388	0	135.058	1.9664e-36	1.05548e-35	yes
PC-3p-58648_87	TRINITY_DN24745_c0_g1	putative chlorophyll A-B binding protein [Medicago truncatula]	LHCB4.1	GO:0009416(response to light stimulus);GO:0009535(chloroplast thylakoid membrane);GO:0009768(photosynthesis, light harvesting in photosystem I);GO:0009941(chloroplast envelope);GO:0010287(plastoglobule);GO:0016168(chlorophyll binding);GO:0031409(pigment binding)	ko00196(Photosynthesis - antenna proteins)	49	15.5	3	3	3	1411.86	641.829	1316.81	6.1337e-69	1.12864e-67	yes
PC-3p-58648_87	TRINITY_DN25299_c0_g1	uncharacterized protein LOC11410655 isoform X2 [Medicago truncatula]	-	GO:0004553(hydrolase activity, hydrolyzing O-glycosyl compounds);GO:0005634(nucleus);GO:0009507(chloroplast)	ko00052(Galactose metabolism);ko00500(Starch and sucrose metabolism)	1994	5	NA	NA	3	0	0	67.5288	4.6985e-30	1.53517e-29	yes
PC-3p-58648_87	TRINITY_DN25313_c1_g1	auxin efflux carrier component 3 [Medicago truncatula]	PIN4	GO:0005783(endoplasmic reticulum);GO:0005886(plasma membrane);GO:0009926(auxin polar transport);GO:0010252(auxin homeostasis);GO:0010329(auxin efflux transmembrane transporter activity)	NA	1652	5.5	4	NA	2	40.3388	0	67.5288	1.1364e-14	1.60392e-14	yes
PC-3p-58648_87	TRINITY_DN25422_c2_g4	WD40 repeat-containing protein HOS15 [Glycine soja]	tbl1xr1-a	GO:0000118(histone deacetylase complex);GO:0003714(transcription corepressor activity);GO:0005634(nucleus);GO:0005834(heterotrimeric G-protein complex);GO:0006351(transcription, DNA-templated);GO:0006357(regulation of transcription by RNA polymerase II);GO:0009409(response to cold);GO:0016575(histone deacetylation);GO:0080008(Cul4-RING E3 ubiquitin ligase complex)	NA	559	8.5	4	NA	NA	40.3388	0	0	3.0257e-18	5.71521e-18	yes
PC-3p-58648_87	TRINITY_DN25593_c0_g1	DNA damage-binding protein 1 [Medicago truncatula]	DDB1	GO:0003684(damaged DNA binding);GO:0005634(nucleus);GO:0006289(nucleotide-excision repair);GO:0031461(cullin-RING ubiquitin ligase complex);GO:0043161(proteasome-mediated ubiquitin-dependent protein catabolic process)	ko04120(Ubiquitin mediated proteolysis);ko03420(Nucleotide excision repair)	3301	5.5	4	NA	NA	40.3388	0	0	3.0257e-18	5.71521e-18	yes
PC-3p-58648_87	TRINITY_DN25668_c0_g2	tubulin beta chain, partial [Trifolium pratense]	TUBB1	GO:0003924(GTPase activity);GO:0005200(structural constituent of cytoskeleton);GO:0005525(GTP binding);GO:0005737(cytoplasm);GO:0005874(microtubule);GO:0005886(plasma membrane);GO:0007017(microtubule-based process);GO:0009409(response to cold);GO:0009651(response to salt stress);GO:0015630(microtubule cytoskeleton)	ko04145(Phagosome)	176	5	1	NA	2	201.694	0	101.293	1.8299e-44	1.26089e-43	yes
PC-3p-58648_87	TRINITY_DN25692_c1_g1	ATP-dependent helicase BRM [Medicago truncatula]	BRM	GO:0003677(DNA binding);GO:0003682(chromatin binding);GO:0004386(helicase activity);GO:0005515(protein binding);GO:0005524(ATP binding);GO:0005634(nucleus);GO:0005829(cytosol);GO:0006351(transcription, DNA-templated);GO:0006355(regulation of transcription, DNA-templated);GO:0007275(multicellular organism development);GO:0008094(DNA-dependent ATPase activity);GO:0010050(vegetative phase change);GO…	NA	3667	8.5	NA	NA	4	0	0	33.7644	2.1684e-15	3.13149e-15	yes
PC-3p-58648_87	TRINITY_DN25780_c0_g1	protein ACCUMULATION AND REPLICATION OF CHLOROPLASTS 6, chloroplastic [Medicago truncatula]	ARC6	GO:0005515(protein binding);GO:0006457(protein folding);GO:0009507(chloroplast);GO:0009536(plastid);GO:0009658(chloroplast organization);GO:0009706(chloroplast inner membrane);GO:0009941(chloroplast envelope);GO:0010020(chloroplast fission);GO:0031357(integral component of chloroplast inner membrane);GO:0043621(protein self-association)	NA	1367	6.5	NA	4	NA	0	30.5633	0	5.326e-14	6.30988e-14	yes
PC-3p-61527_82	TRINITY_DN12370_c0_g1	-	-	NA	NA	115	11.5	4	NA	NA	40.3388	0	0	3.0257e-18	5.71521e-18	yes
PC-3p-61527_82	TRINITY_DN14159_c0_g1	putative protein-serine/threonine kinase [Medicago truncatula]	-	NA	NA	154	9	4	NA	NA	40.3388	0	0	3.0257e-18	5.71521e-18	yes
PC-3p-61527_82	TRINITY_DN14444_c0_g5	hypothetical protein TSUD_324640 [Trifolium subterraneum]	-	NA	NA	292	14.5	NA	4	NA	0	30.5633	0	5.326e-14	6.30988e-14	yes
PC-3p-61527_82	TRINITY_DN14591_c0_g1	RGG repeats nuclear RNA binding protein A [Medicago truncatula]	RGGA	GO:0003723(RNA binding);GO:0003729(mRNA binding);GO:0005634(nucleus);GO:0005737(cytoplasm);GO:0006970(response to osmotic stress);GO:0009651(response to salt stress);GO:0009737(response to abscisic acid);GO:0009738(abscisic acid-activated signaling pathway);GO:0009787(regulation of abscisic acid-activated signaling pathway);GO:0048471(perinuclear region of cytoplasm);GO:0071470(cellular response …	NA	154	7.5	2	2	2	403.388	489.013	438.937	0.015427	0.0156607	yes
PC-3p-61527_82	TRINITY_DN14892_c0_g2	putative soyasaponin III rhamnosyltransferase [Medicago truncatula]	GmSGT3	GO:0009813(flavonoid biosynthetic process);GO:0043231(intracellular membrane-bounded organelle);GO:0052696(flavonoid glucuronidation);GO:0080043(quercetin 3-O-glucosyltransferase activity);GO:0080044(quercetin 7-O-glucosyltransferase activity)	NA	338	12.5	2	2	2	685.76	702.955	168.822	7.7182e-78	1.88649e-76	yes
PC-3p-61527_82	TRINITY_DN16718_c0_g2	HMG1/2-like protein [Medicago truncatula]	-	GO:0000785(chromatin);GO:0003677(DNA binding);GO:0003682(chromatin binding);GO:0003700(DNA binding transcription factor activity);GO:0005634(nucleus);GO:0005829(cytosol);GO:0006333(chromatin assembly or disassembly);GO:0030527(structural constituent of chromatin)	NA	145	17.5	2	NA	NA	161.355	0	0	8.3268e-71	1.57284e-69	yes
PC-3p-61527_82	TRINITY_DN16876_c0_g1	zinc finger CCCH domain-containing protein 68 [Medicago truncatula]	Os04g0663200	GO:0003676(nucleic acid binding);GO:0003677(DNA binding);GO:0005515(protein binding);GO:0005634(nucleus);GO:0008150(biological_process);GO:0046872(metal ion binding)	NA	1864	15.5	4	NA	NA	40.3388	0	0	3.0257e-18	5.71521e-18	yes
PC-3p-61527_82	TRINITY_DN17566_c1_g1	probable magnesium transporter NIPA4 [Medicago truncatula]	At1g71900	GO:0005769(early endosome);GO:0005886(plasma membrane);GO:0008150(biological_process);GO:0015095(magnesium ion transmembrane transporter activity);GO:0016021(integral component of membrane)	NA	1399	14.5	4	NA	4	40.3388	0	33.7644	5.8097e-09	6.43576e-09	yes
PC-3p-61527_82	TRINITY_DN18457_c0_g1	glycosyltransferase family protein 64 protein C5 [Medicago truncatula]	At5g04500	GO:0006486(protein glycosylation);GO:0016021(integral component of membrane);GO:0016757(transferase activity, transferring glycosyl groups);GO:0046872(metal ion binding)	NA	2988	8	NA	2	2	0	366.759	202.586	5.621e-78	1.38279e-76	yes
PC-3p-61527_82	TRINITY_DN21141_c1_g2	RNA polymerase sigma factor sigF, chloroplastic [Medicago truncatula]	SIGF	GO:0003677(DNA binding);GO:0003700(DNA binding transcription factor activity);GO:0003899(DNA-directed 5'-3' RNA polymerase activity);GO:0005515(protein binding);GO:0005634(nucleus);GO:0006352(DNA-templated transcription, initiation);GO:0006355(regulation of transcription, DNA-templated);GO:0009507(chloroplast);GO:0009536(plastid);GO:0016987(bacterial sigma factor activity);GO:0045893(positive reg…	NA	857	7.5	2	NA	NA	121.017	0	0	2.761e-53	2.58192e-52	yes
PC-3p-61527_82	TRINITY_DN23053_c0_g1	hypothetical protein MtrunA17_Chr1g0188561 [Medicago truncatula]	-	GO:0003674(molecular_function);GO:0005634(nucleus);GO:0008150(biological_process)	NA	1595	10	4	NA	NA	40.3388	0	0	3.0257e-18	5.71521e-18	yes
PC-3p-61527_82	TRINITY_DN23077_c1_g2	nuclear matrix constituent-like protein, putative [Medicago truncatula]	CRWN2	GO:0005634(nucleus);GO:0005652(nuclear lamina);GO:0005654(nucleoplasm);GO:0005737(cytoplasm);GO:0006997(nucleus organization);GO:0031965(nuclear membrane);GO:0034399(nuclear periphery);GO:0097298(regulation of nucleus size)	ko00270(Cysteine and methionine metabolism);ko00280(Valine, leucine and isoleucine degradation);ko00290(Valine, leucine and isoleucine biosynthesis);ko00770(Pantothenate and CoA biosynthesis)	3026	13	4	4	NA	40.3388	30.5633	0	7.2896e-09	7.93241e-09	yes
PC-3p-61527_82	TRINITY_DN25930_c0_g1	heat shock cognate protein 80 [Cicer arietinum]	HSC80	GO:0005515(protein binding);GO:0005524(ATP binding);GO:0005730(nucleolus);GO:0005737(cytoplasm);GO:0005794(Golgi apparatus);GO:0005829(cytosol);GO:0005886(plasma membrane);GO:0006457(protein folding);GO:0009408(response to heat);GO:0016020(membrane);GO:0045087(innate immune response);GO:0051082(unfolded protein binding);GO:0051131(chaperone-mediated protein complex assembly);GO:0071277(cellular r…	ko04141(Protein processing in endoplasmic reticulum);ko04626(Plant-pathogen interaction)	771	5.5	3	3	3	363.05	336.196	337.644	0.51674	0.517149	yes
PC-3p-61527_82	TRINITY_DN26148_c1_g1	alpha-amylase 3, chloroplastic [Medicago truncatula]	AMY3	GO:0004556(alpha-amylase activity);GO:0005509(calcium ion binding);GO:0005576(extracellular region);GO:0005983(starch catabolic process);GO:0009507(chloroplast);GO:0009570(chloroplast stroma);GO:0103025(alpha-amylase activity (releasing maltohexaose))	ko00500(Starch and sucrose metabolism)	1261	14	3	NA	NA	80.6777	0	0	9.1449e-36	4.07513e-35	yes
PC-3p-61527_82	TRINITY_DN26207_c0_g1	glycine-rich RNA-binding protein GRP1A [Medicago truncatula]	-	GO:0000380(alternative mRNA splicing, via spliceosome);GO:0003690(double-stranded DNA binding);GO:0003697(single-stranded DNA binding);GO:0003723(RNA binding);GO:0003729(mRNA binding);GO:0005515(protein binding);GO:0005634(nucleus);GO:0005737(cytoplasm);GO:0005739(mitochondrion);GO:0005777(peroxisome);GO:0005829(cytosol);GO:0006406(mRNA export from nucleus);GO:0006970(response to osmotic stress);…	NA	603	9.5	4	NA	4	40.3388	0	33.7644	5.8097e-09	6.43576e-09	yes
PC-3p-61527_82	TRINITY_DN26303_c2_g2	alpha-glucan water dikinase, chloroplastic [Medicago truncatula]	R1	GO:0005515(protein binding);GO:0005524(ATP binding);GO:0005739(mitochondrion);GO:0005983(starch catabolic process);GO:0009507(chloroplast);GO:0009570(chloroplast stroma);GO:0009610(response to symbiotic fungus);GO:0009631(cold acclimation);GO:0009941(chloroplast envelope);GO:0016310(phosphorylation);GO:0046872(metal ion binding);GO:0050521(alpha-glucan, water dikinase activity)	NA	2085	10.5	NA	NA	2	0	0	101.293	1.0173e-44	7.03524e-44	yes
PC-3p-61527_82	TRINITY_DN26429_c1_g2	kinesin-like protein KIN-4C isoform X2 [Medicago truncatula]	KIN4C	GO:0003777(microtubule motor activity);GO:0005871(kinesin complex);GO:0007018(microtubule-based movement);GO:0016887(ATPase activity)	NA	2433	13.5	2	NA	NA	80.6777	0	0	9.1449e-36	4.07513e-35	yes
PC-3p-78936_58	TRINITY_DN11880_c0_g1	uncharacterized protein LOC11421388 [Medicago truncatula]	-	GO:0000123(histone acetyltransferase complex);GO:0003677(DNA binding);GO:0003700(DNA binding transcription factor activity);GO:0005515(protein binding);GO:0005634(nucleus);GO:0006355(regulation of transcription, DNA-templated);GO:0009506(plasmodesma);GO:0031935(regulation of chromatin silencing);GO:0080111(DNA demethylation)	NA	396	10	2	NA	NA	121.017	0	0	2.761e-53	2.58192e-52	yes
PC-3p-78936_58	TRINITY_DN13018_c0_g1	uncharacterized protein LOC11434085 [Medicago truncatula]	-	NA	NA	843	6.5	NA	4	NA	0	30.5633	0	5.326e-14	6.30988e-14	yes
PC-3p-78936_58	TRINITY_DN13502_c1_g2	phosducin-like protein 3 [Medicago truncatula]	PDCL3	GO:0005737(cytoplasm);GO:0008479(queuine tRNA-ribosyltransferase activity);GO:0008616(queuosine biosynthetic process)	NA	461	10	NA	NA	4	0	0	33.7644	2.1684e-15	3.13149e-15	yes
PC-3p-78936_58	TRINITY_DN13651_c0_g1	E3 ubiquitin-protein ligase At1g12760 [Medicago truncatula]	At1g12760	GO:0043161(proteasome-mediated ubiquitin-dependent protein catabolic process);GO:0061630(ubiquitin protein ligase activity)	NA	409	8	4	NA	NA	40.3388	0	0	3.0257e-18	5.71521e-18	yes
PC-3p-78936_58	TRINITY_DN13938_c0_g1	ribulose bisphosphate carboxylase/oxygenase activase 2, chloroplastic [Medicago truncatula]	RCA2	GO:0005524(ATP binding);GO:0005618(cell wall);GO:0005634(nucleus);GO:0009409(response to cold);GO:0009416(response to light stimulus);GO:0009507(chloroplast);GO:0009535(chloroplast thylakoid membrane);GO:0009570(chloroplast stroma);GO:0009579(thylakoid);GO:0009753(response to jasmonic acid);GO:0009941(chloroplast envelope);GO:0010150(leaf senescence);GO:0010287(plastoglobule);GO:0010319(stromule)…	ko03010(Ribosome)	218	8.5	2	3	2	484.066	213.943	540.23	9.2763e-33	3.824e-32	yes
PC-3p-78936_58	TRINITY_DN13990_c0_g1	probable 26S proteasome non-ATPase regulatory subunit 3 [Medicago truncatula]	21D7	GO:0006511(ubiquitin-dependent protein catabolic process);GO:0008541(proteasome regulatory particle, lid subcomplex)	ko03050(Proteasome)	1362	7.5	NA	NA	2	0	0	236.351	0	0	yes
PC-3p-78936_58	TRINITY_DN14236_c0_g1	probable protein phosphatase 2C 12 isoform X2 [Medicago truncatula]	At1g47380	GO:0004722(protein serine/threonine phosphatase activity);GO:0005739(mitochondrion);GO:0005829(cytosol);GO:0006470(protein dephosphorylation);GO:0046872(metal ion binding)	NA	885	12	NA	4	NA	0	30.5633	0	5.326e-14	6.30988e-14	yes
PC-3p-78936_58	TRINITY_DN14692_c0_g3	protein YLS3 [Medicago truncatula]	YLS3	GO:0005886(plasma membrane);GO:0006869(lipid transport);GO:0008289(lipid binding);GO:0016021(integral component of membrane);GO:0031225(anchored component of membrane)	NA	556	9	4	NA	NA	40.3388	0	0	3.0257e-18	5.71521e-18	yes
PC-3p-78936_58	TRINITY_DN16063_c0_g4	putative NADH:ubiquinone reductase (H(+)-translocating) (mitochondrion) [Rosa chinensis]	ND5	GO:0005739(mitochondrion)	ko00190(Oxidative phosphorylation)	420	7.5	3	2	3	80.6777	489.013	168.822	3.3439e-82	9.47438e-81	yes
PC-3p-78936_58	TRINITY_DN16349_c0_g1	NADH dehydrogenase [ubiquinone] 1 alpha subcomplex assembly factor 2 [Medicago truncatula]	-	GO:0005634(nucleus);GO:0005739(mitochondrion);GO:0005743(mitochondrial inner membrane);GO:0008137(NADH dehydrogenase (ubiquinone) activity);GO:0009055(electron transfer activity);GO:0016491(oxidoreductase activity);GO:0070469(respiratory chain)	NA	318	10	NA	4	NA	0	30.5633	0	5.326e-14	6.30988e-14	yes
PC-3p-78936_58	TRINITY_DN16364_c0_g4	uncharacterized protein LOC25484139 [Medicago truncatula]	-	GO:0003674(molecular_function);GO:0005739(mitochondrion);GO:0042538(hyperosmotic salinity response)	NA	766	9	2	4	4	121.017	30.5633	33.7644	3.0333e-19	6.99095e-19	yes
PC-3p-78936_58	TRINITY_DN16864_c0_g1	MAKIBISHI 1 [Medicago truncatula]	RMA3	GO:0004842(ubiquitin-protein transferase activity);GO:0005634(nucleus);GO:0005783(endoplasmic reticulum);GO:0008270(zinc ion binding);GO:0016021(integral component of membrane);GO:0036513(Derlin-1 retrotranslocation complex);GO:0044390(ubiquitin-like protein conjugating enzyme binding);GO:0046872(metal ion binding);GO:0071712(ER-associated misfolded protein catabolic process)	ko04141(Protein processing in endoplasmic reticulum)	975	13	NA	4	4	0	30.5633	33.7644	9.1976e-08	9.66516e-08	yes
PC-3p-78936_58	TRINITY_DN16941_c0_g1	putative carboxylesterase, 2-hydroxyisoflavanone dehydratase [Medicago truncatula]	HIDM	GO:0009717(isoflavonoid biosynthetic process);GO:0033987(2-hydroxyisoflavanone dehydratase activity);GO:0046287(isoflavonoid metabolic process);GO:0052689(carboxylic ester hydrolase activity)	ko00943(Isoflavonoid biosynthesis)	817	8.5	NA	4	NA	0	30.5633	0	5.326e-14	6.30988e-14	yes
PC-3p-78936_58	TRINITY_DN16950_c1_g5	3-ketoacyl-CoA synthase 10 isoform X1 [Medicago truncatula]	FDH	GO:0000038(very long-chain fatty acid metabolic process);GO:0005634(nucleus);GO:0005783(endoplasmic reticulum);GO:0005789(endoplasmic reticulum membrane);GO:0006633(fatty acid biosynthetic process);GO:0008610(lipid biosynthetic process);GO:0009409(response to cold);GO:0009416(response to light stimulus);GO:0009913(epidermal cell differentiation);GO:0016020(membrane);GO:0016021(integral component …	ko00062(Fatty acid elongation)	464	9	2	NA	2	80.6777	0	67.5288	3.3721e-17	6.28407e-17	yes
PC-3p-78936_58	TRINITY_DN17325_c0_g1	uncharacterized protein LOC11446316 [Medicago truncatula]	-	GO:0003674(molecular_function);GO:0005515(protein binding);GO:0005623(cell);GO:0005634(nucleus);GO:0005739(mitochondrion);GO:0008150(biological_process);GO:0071333(cellular response to glucose stimulus)	ko00040(Pentose and glucuronate interconversions)	439	7	NA	NA	4	0	0	33.7644	2.1684e-15	3.13149e-15	yes
PC-3p-78936_58	TRINITY_DN17626_c0_g1	RecName: Full=Cytochrome P450 81E8	CYP81E8	GO:0016020(membrane);GO:0016709(oxidoreductase activity, acting on paired donors, with incorporation or reduction of molecular oxygen, NAD(P)H as one donor, and incorporation of one atom of oxygen);GO:0042343(indole glucosinolate metabolic process);GO:0044550(secondary metabolite biosynthetic process);GO:0098542(defense response to other organism)	ko00943(Isoflavonoid biosynthesis)	584	8	4	2	NA	40.3388	91.6898	0	1.4416e-21	3.51602e-21	yes
PC-3p-78936_58	TRINITY_DN18338_c0_g1	oxygen-dependent coproporphyrinogen-III oxidase, chloroplastic [Medicago truncatula]	CPX	GO:0042803(protein homodimerization activity)	ko00860(Porphyrin and chlorophyll metabolism)	823	11	3	NA	NA	80.6777	0	0	9.1449e-36	4.07513e-35	yes
PC-3p-78936_58	TRINITY_DN18434_c0_g5	serine/threonine-protein kinase STY13 [Medicago truncatula]	DDB_G0287001	GO:0004672(protein kinase activity);GO:0004712(protein serine/threonine/tyrosine kinase activity);GO:0005524(ATP binding);GO:0005575(cellular_component);GO:0006468(protein phosphorylation);GO:0016301(kinase activity)	ko00280(Valine, leucine and isoleucine degradation)	55	14.5	4	NA	NA	40.3388	0	0	3.0257e-18	5.71521e-18	yes
PC-3p-78936_58	TRINITY_DN19352_c0_g1	ATP-dependent Clp protease proteolytic subunit-related protein 1, chloroplastic [Medicago truncatula]	CLPR1	GO:0003723(RNA binding);GO:0004252(serine-type endopeptidase activity);GO:0006364(rRNA processing);GO:0006396(RNA processing);GO:0006508(proteolysis);GO:0009507(chloroplast);GO:0009532(plastid stroma);GO:0009534(chloroplast thylakoid);GO:0009570(chloroplast stroma);GO:0009658(chloroplast organization);GO:0009840(chloroplastic endopeptidase Clp complex);GO:0009941(chloroplast envelope)	NA	1051	6.5	3	3	3	161.355	213.943	168.822	0.011515	0.0116989	yes
PC-3p-78936_58	TRINITY_DN19700_c0_g2	aconitate hydratase, cytoplasmic [Medicago truncatula]	Os08g0191100	GO:0003994(aconitate hydratase activity);GO:0005507(copper ion binding);GO:0005515(protein binding);GO:0005524(ATP binding);GO:0005618(cell wall);GO:0005737(cytoplasm);GO:0005739(mitochondrion);GO:0005774(vacuolar membrane);GO:0005794(Golgi apparatus);GO:0005829(cytosol);GO:0006097(glyoxylate cycle);GO:0006099(tricarboxylic acid cycle);GO:0006101(citrate metabolic process);GO:0006102(isocitrate m…	ko00020(Citrate cycle (TCA cycle));ko00630(Glyoxylate and dicarboxylate metabolism)	145	13.5	NA	4	NA	0	30.5633	0	5.326e-14	6.30988e-14	yes
PC-3p-78936_58	TRINITY_DN19848_c0_g1	BEL1-like homeodomain protein 1 [Medicago truncatula]	BLH1	GO:0003677(DNA binding);GO:0003700(DNA binding transcription factor activity);GO:0005515(protein binding);GO:0005634(nucleus);GO:0005737(cytoplasm);GO:0006351(transcription, DNA-templated);GO:0006355(regulation of transcription, DNA-templated);GO:0009610(response to symbiotic fungus);GO:0009737(response to abscisic acid);GO:0010197(polar nucleus fusion);GO:0010201(response to continuous far red l…	NA	838	13.5	2	3	4	121.017	61.1266	33.7644	9.596e-13	1.10671e-12	yes
PC-3p-78936_58	TRINITY_DN19933_c0_g1	DNA (cytosine-5)-methyltransferase DRM1/2 [Medicago truncatula]	DRM2	GO:0003677(DNA binding);GO:0003886(DNA (cytosine-5-)-methyltransferase activity);GO:0005515(protein binding);GO:0005634(nucleus);GO:0005654(nucleoplasm);GO:0006306(DNA methylation);GO:0008170(N-methyltransferase activity);GO:0009008(DNA-methyltransferase activity);GO:0016458(gene silencing);GO:0050832(defense response to fungus);GO:0051567(histone H3-K9 methylation)	NA	201	10.5	NA	NA	2	0	0	67.5288	4.6985e-30	1.53517e-29	yes
PC-3p-78936_58	TRINITY_DN20298_c1_g3	nucleolin 2 [Medicago truncatula]	-	GO:0003676(nucleic acid binding);GO:0003723(RNA binding);GO:0005634(nucleus);GO:0006397(mRNA processing)	ko03015(mRNA surveillance pathway)	2757	5.5	NA	NA	2	0	0	101.293	1.0173e-44	7.03524e-44	yes
PC-3p-78936_58	TRINITY_DN20529_c0_g1	FKBP-type peptidyl-prolyl cis-trans isomerase [Medicago truncatula]	FKBP19	GO:0003755(peptidyl-prolyl cis-trans isomerase activity);GO:0005528(FK506 binding);GO:0005789(endoplasmic reticulum membrane);GO:0061077(chaperone-mediated protein folding)	NA	475	10	NA	4	NA	0	30.5633	0	5.326e-14	6.30988e-14	yes
PC-3p-78936_58	TRINITY_DN20585_c0_g1	D-3-phosphoglycerate dehydrogenase 2, chloroplastic [Medicago truncatula]	PGDH2	GO:0004617(phosphoglycerate dehydrogenase activity);GO:0009070(serine family amino acid biosynthetic process)	ko00260(Glycine, serine and threonine metabolism)	1527	6	NA	NA	4	0	0	33.7644	2.1684e-15	3.13149e-15	yes
PC-3p-78936_58	TRINITY_DN20840_c0_g1	hypothetical protein TSUD_223150 [Trifolium subterraneum]	-	NA	ko03030(DNA replication);ko03420(Nucleotide excision repair);ko03430(Mismatch repair);ko03440(Homologous recombination)	1453	11.5	NA	4	NA	0	30.5633	0	5.326e-14	6.30988e-14	yes
PC-3p-78936_58	TRINITY_DN20909_c0_g2	gamma-tocopherol methyltransferase [Medicago truncatula]	VTE4	GO:0005737(cytoplasm);GO:0008757(S-adenosylmethionine-dependent methyltransferase activity);GO:0032259(methylation)	ko00130(Ubiquinone and other terpenoid-quinone biosynthesis)	336	9	2	4	2	282.372	30.5633	101.293	8.7417e-54	9.57384e-53	yes
PC-3p-78936_58	TRINITY_DN21113_c0_g1	metal tolerance-like protein [Medicago truncatula]	MTPC1	GO:0005385(zinc ion transmembrane transporter activity);GO:0010043(response to zinc ion);GO:0016020(membrane);GO:0061088(regulation of sequestering of zinc ion)	NA	1191	8.5	4	4	NA	40.3388	30.5633	0	7.2896e-09	7.93241e-09	yes
PC-3p-78936_58	TRINITY_DN21314_c0_g2	RNA polymerase II-associated factor 1 [Trifolium pratense]	VIP2	GO:0003674(molecular_function);GO:0005634(nucleus);GO:0009910(negative regulation of flower development);GO:0016571(histone methylation)	NA	937	13	NA	0	4	0	183.38	33.7644	6.9526e-58	8.94804e-57	yes
PC-3p-78936_58	TRINITY_DN21599_c0_g3	aquaporin pip2-7-like protein [Trifolium pratense]	PIP2-7	GO:0005773(vacuole);GO:0005887(integral component of plasma membrane);GO:0009506(plasmodesma);GO:0009992(cellular water homeostasis);GO:0015250(water channel activity);GO:0015254(glycerol channel activity);GO:0034220(ion transmembrane transport)	NA	197	7.5	2	4	NA	121.017	30.5633	0	9.1063e-35	3.97245e-34	yes
PC-3p-78936_58	TRINITY_DN21622_c0_g1	nudix hydrolase 19, chloroplastic [Medicago truncatula]	NUDT19	GO:0000210(NAD+ diphosphatase activity);GO:0005829(cytosol);GO:0009507(chloroplast);GO:0016787(hydrolase activity);GO:0035529(NADH pyrophosphatase activity);GO:0046872(metal ion binding)	ko00760(Nicotinate and nicotinamide metabolism);ko04146(Peroxisome)	429	6	NA	4	4	0	30.5633	33.7644	9.1976e-08	9.66516e-08	yes
PC-3p-78936_58	TRINITY_DN21779_c0_g2	probable inactive ATP-dependent zinc metalloprotease FTSHI 5, chloroplastic isoform X1 [Medicago truncatula]	FTSHI5	GO:0004176(ATP-dependent peptidase activity);GO:0005739(mitochondrion);GO:0006508(proteolysis);GO:0008237(metallopeptidase activity);GO:0009941(chloroplast envelope)	NA	3672	6	4	2	2	40.3388	183.38	67.5288	1.5296e-26	4.09836e-26	yes
PC-3p-78936_58	TRINITY_DN21885_c0_g2	Fe-superoxide dismutase precursor [Medicago sativa]	SODB	GO:0004784(superoxide dismutase activity);GO:0005515(protein binding);GO:0009295(nucleoid);GO:0009411(response to UV);GO:0009507(chloroplast);GO:0009534(chloroplast thylakoid);GO:0009579(thylakoid);GO:0042644(chloroplast nucleoid);GO:0046872(metal ion binding);GO:0055114(oxidation-reduction process)	ko04146(Peroxisome)	588	21	3	3	2	161.355	91.6898	168.822	2.5709e-06	2.68033e-06	yes
PC-3p-78936_58	TRINITY_DN22070_c0_g1	D-3-phosphoglycerate dehydrogenase 1, chloroplastic [Medicago truncatula]	PGDH1	GO:0004617(phosphoglycerate dehydrogenase activity);GO:0009070(serine family amino acid biosynthetic process)	ko00260(Glycine, serine and threonine metabolism)	770	8.5	NA	2	NA	0	61.1266	0	2.8349e-27	7.6679e-27	yes
PC-3p-78936_58	TRINITY_DN22433_c1_g1	V-type proton ATPase subunit a1 [Medicago truncatula]	VHA-a1	GO:0000325(plant-type vacuole);GO:0007035(vacuolar acidification);GO:0015986(ATP synthesis coupled proton transport);GO:0016471(vacuolar proton-transporting V-type ATPase complex);GO:0046961(proton-transporting ATPase activity, rotational mechanism);GO:0051117(ATPase binding);GO:0070072(vacuolar proton-transporting V-type ATPase complex assembly)	ko00190(Oxidative phosphorylation);ko04145(Phagosome)	1197	9	NA	NA	4	0	0	33.7644	2.1684e-15	3.13149e-15	yes
PC-3p-78936_58	TRINITY_DN22533_c1_g1	ABC transporter B family member 21 [Medicago truncatula]	ABCB4	GO:0016021(integral component of membrane);GO:0042626(ATPase activity, coupled to transmembrane movement of substances);GO:0055085(transmembrane transport)	ko02010(ABC transporters)	3642	11.5	NA	NA	2	0	0	101.293	1.0173e-44	7.03524e-44	yes
PC-3p-78936_58	TRINITY_DN22801_c0_g1	heavy metal-associated isoprenylated plant protein 34 [Medicago truncatula]	HIPP32	GO:0005737(cytoplasm);GO:0030001(metal ion transport);GO:0046914(transition metal ion binding);GO:0046916(cellular transition metal ion homeostasis)	NA	1522	9	NA	3	3	0	61.1266	67.5288	8.4537e-15	1.20888e-14	yes
PC-3p-78936_58	TRINITY_DN22811_c0_g2	hypothetical protein GOBAR_DD28494 [Gossypium barbadense]	-	NA	ko00230(Purine metabolism);ko00240(Pyrimidine metabolism);ko03020(RNA polymerase)	203	3.5	2	2	2	21621.6	23503.2	3747.85	0	0	yes
PC-3p-78936_58	TRINITY_DN23033_c0_g2	probable acyl-activating enzyme 2 isoform X1 [Medicago truncatula]	AAE2	GO:0005739(mitochondrion);GO:0006631(fatty acid metabolic process);GO:0016874(ligase activity)	NA	1488	6	NA	NA	4	0	0	33.7644	2.1684e-15	3.13149e-15	yes
PC-3p-78936_58	TRINITY_DN23446_c0_g1	uncharacterized protein LOC25490114 [Medicago truncatula]	-	GO:0005737(cytoplasm);GO:0008150(biological_process)	NA	798	14	2	4	NA	80.6777	30.5633	0	3.6961e-20	8.81092e-20	yes
PC-3p-78936_58	TRINITY_DN23552_c1_g3	-	-	NA	NA	183	11	4	NA	NA	40.3388	0	0	3.0257e-18	5.71521e-18	yes
PC-3p-78936_58	TRINITY_DN23703_c0_g1	heparan-alpha-glucosaminide N-acetyltransferase [Medicago truncatula]	Hgsnat	GO:0008150(biological_process);GO:0016021(integral component of membrane);GO:0016740(transferase activity)	ko00531(Glycosaminoglycan degradation)	1326	14.5	NA	4	NA	0	30.5633	0	5.326e-14	6.30988e-14	yes
PC-3p-78936_58	TRINITY_DN23709_c2_g1	ARM repeat protein interacting WITH ABF2 protein [Medicago truncatula]	ARIA	GO:0005634(nucleus);GO:0005737(cytoplasm)	NA	1977	9.5	NA	4	NA	0	30.5633	0	5.326e-14	6.30988e-14	yes
PC-3p-78936_58	TRINITY_DN23829_c0_g3	ATP-citrate synthase alpha chain protein 1 isoform X2 [Medicago truncatula]	ACLA-1	GO:0003878(ATP citrate synthase activity);GO:0005524(ATP binding);GO:0005737(cytoplasm);GO:0005829(cytosol);GO:0006085(acetyl-CoA biosynthetic process);GO:0006633(fatty acid biosynthetic process);GO:0009346(citrate lyase complex)	ko00020(Citrate cycle (TCA cycle))	1068	10.5	NA	2	NA	0	152.816	0	4.2589e-67	7.03027e-66	yes
PC-3p-78936_58	TRINITY_DN23928_c0_g1	putative DNA-binding domain-containing protein [Medicago truncatula]	MBD10	GO:0003677(DNA binding);GO:0005634(nucleus);GO:0005829(cytosol);GO:0006351(transcription, DNA-templated);GO:0006355(regulation of transcription, DNA-templated);GO:0008327(methyl-CpG binding)	NA	918	6	NA	4	3	0	30.5633	67.5288	6.4851e-16	1.17172e-15	yes
PC-3p-78936_58	TRINITY_DN24052_c1_g4	uncharacterized protein LOC11441286 [Medicago truncatula]	RPL2	GO:0002181(cytoplasmic translation);GO:0003735(structural constituent of ribosome);GO:0005762(mitochondrial large ribosomal subunit);GO:0032543(mitochondrial translation)	ko03010(Ribosome)	720	9	NA	4	NA	0	30.5633	0	5.326e-14	6.30988e-14	yes
PC-3p-78936_58	TRINITY_DN24083_c0_g1	allantoinase [Medicago truncatula]	ALN	GO:0000256(allantoin catabolic process);GO:0004038(allantoinase activity);GO:0005783(endoplasmic reticulum);GO:0006145(purine nucleobase catabolic process);GO:0006995(cellular response to nitrogen starvation);GO:0008270(zinc ion binding);GO:0010136(ureide catabolic process);GO:0016787(hydrolase activity);GO:0050897(cobalt ion binding)	ko00230(Purine metabolism)	659	7.5	NA	2	NA	0	61.1266	0	2.8349e-27	7.6679e-27	yes
PC-3p-78936_58	TRINITY_DN24217_c0_g1	protoporphyrin IX magnesium chelatase subunit ChlD [Medicago truncatula]	CHLD	GO:0005524(ATP binding);GO:0009507(chloroplast);GO:0009534(chloroplast thylakoid);GO:0009570(chloroplast stroma);GO:0010007(magnesium chelatase complex);GO:0015979(photosynthesis);GO:0015995(chlorophyll biosynthetic process);GO:0016851(magnesium chelatase activity)	ko00860(Porphyrin and chlorophyll metabolism)	1160	9	2	2	2	564.744	183.38	168.822	2.3114e-72	4.93012e-71	yes
PC-3p-78936_58	TRINITY_DN24257_c0_g4	ATP-dependent helicase BRM [Medicago truncatula]	BRM	GO:0003677(DNA binding);GO:0003682(chromatin binding);GO:0004386(helicase activity);GO:0005515(protein binding);GO:0005524(ATP binding);GO:0005634(nucleus);GO:0005829(cytosol);GO:0006351(transcription, DNA-templated);GO:0006355(regulation of transcription, DNA-templated);GO:0007275(multicellular organism development);GO:0008094(DNA-dependent ATPase activity);GO:0010050(vegetative phase change);GO…	NA	68	6.5	2	NA	NA	80.6777	0	0	9.1449e-36	4.07513e-35	yes
PC-3p-78936_58	TRINITY_DN24598_c0_g2	zinc finger protein CONSTANS-LIKE 7 isoform X2 [Medicago truncatula]	CIA2	GO:0003674(molecular_function);GO:0005634(nucleus);GO:0008150(biological_process)	ko04712(Circadian rhythm - plant)	400	8	4	NA	NA	40.3388	0	0	3.0257e-18	5.71521e-18	yes
PC-3p-78936_58	TRINITY_DN24771_c0_g1	crocetin glucosyltransferase, chloroplastic [Medicago truncatula]	UGT75L6	GO:0009813(flavonoid biosynthetic process);GO:0043231(intracellular membrane-bounded organelle);GO:0052696(flavonoid glucuronidation);GO:0080043(quercetin 3-O-glucosyltransferase activity);GO:0080044(quercetin 7-O-glucosyltransferase activity)	NA	30	12	NA	2	4	0	91.6898	33.7644	4.639e-23	1.16692e-22	yes
PC-3p-78936_58	TRINITY_DN24771_c0_g3	crocetin glucosyltransferase, chloroplastic [Medicago truncatula]	UGT75L6	GO:0009813(flavonoid biosynthetic process);GO:0043231(intracellular membrane-bounded organelle);GO:0052696(flavonoid glucuronidation);GO:0080043(quercetin 3-O-glucosyltransferase activity);GO:0080044(quercetin 7-O-glucosyltransferase activity)	NA	57	12	4	2	NA	40.3388	122.253	0	7.9994e-32	3.25637e-31	yes
PC-3p-78936_58	TRINITY_DN24973_c0_g2	glucan endo-1,3-beta-glucosidase 1 [Medicago truncatula]	At1g11820	GO:0004553(hydrolase activity, hydrolyzing O-glycosyl compounds);GO:0030247(polysaccharide binding);GO:0046658(anchored component of plasma membrane)	ko00500(Starch and sucrose metabolism)	769	9.5	NA	NA	2	0	0	67.5288	4.6985e-30	1.53517e-29	yes
PC-3p-78936_58	TRINITY_DN24997_c0_g2	stress response protein NST1 [Medicago truncatula]	-	GO:0006855(drug transmembrane transport)	NA	1056	9	NA	3	NA	0	61.1266	0	2.8349e-27	7.6679e-27	yes
PC-3p-78936_58	TRINITY_DN25057_c1_g1	ribulose bisphosphate carboxylase/oxygenase activase 2, chloroplastic [Medicago truncatula]	RCA2	GO:0005524(ATP binding);GO:0005618(cell wall);GO:0005634(nucleus);GO:0009409(response to cold);GO:0009416(response to light stimulus);GO:0009507(chloroplast);GO:0009535(chloroplast thylakoid membrane);GO:0009570(chloroplast stroma);GO:0009579(thylakoid);GO:0009753(response to jasmonic acid);GO:0009941(chloroplast envelope);GO:0010150(leaf senescence);GO:0010287(plastoglobule);GO:0010319(stromule)…	ko03010(Ribosome)	866	9.5	2	2	2	5405.41	9719.12	4119.26	0	0	yes
PC-3p-78936_58	TRINITY_DN25057_c1_g3	-	-	NA	NA	22	9.5	2	2	2	5728.12	11063.9	4119.26	0	0	yes
PC-3p-78936_58	TRINITY_DN25321_c2_g2	protein SPIRRIG [Medicago truncatula]	SPI	GO:0000932(P-body);GO:0005515(protein binding);GO:0005634(nucleus);GO:0005737(cytoplasm);GO:0007033(vacuole organization);GO:0007034(vacuolar transport);GO:0007165(signal transduction);GO:0009737(response to abscisic acid);GO:0009825(multidimensional cell growth);GO:0010090(trichome morphogenesis);GO:0033962(cytoplasmic mRNA processing body assembly);GO:0071472(cellular response to salt stress);G…	NA	8943	7.5	NA	4	NA	0	30.5633	0	5.326e-14	6.30988e-14	yes
PC-3p-78936_58	TRINITY_DN25328_c1_g3	putative transferase, protein kinase TKL-Pl-5 family [Medicago truncatula]	splA	GO:0004672(protein kinase activity);GO:0004674(protein serine/threonine kinase activity);GO:0004712(protein serine/threonine/tyrosine kinase activity);GO:0005515(protein binding);GO:0005783(endoplasmic reticulum);GO:0005886(plasma membrane);GO:0006970(response to osmotic stress);GO:0009898(cytoplasmic side of plasma membrane);GO:0016301(kinase activity);GO:0035556(intracellular signal transductio…	NA	849	15	4	NA	NA	40.3388	0	0	3.0257e-18	5.71521e-18	yes
PC-3p-78936_58	TRINITY_DN25692_c0_g1	ATP-dependent helicase BRM [Medicago truncatula]	BRM	GO:0003677(DNA binding);GO:0003682(chromatin binding);GO:0004386(helicase activity);GO:0005515(protein binding);GO:0005524(ATP binding);GO:0005634(nucleus);GO:0005829(cytosol);GO:0006351(transcription, DNA-templated);GO:0006355(regulation of transcription, DNA-templated);GO:0007275(multicellular organism development);GO:0008094(DNA-dependent ATPase activity);GO:0010050(vegetative phase change);GO…	NA	353	13.5	NA	NA	4	0	0	33.7644	2.1684e-15	3.13149e-15	yes
PC-3p-78936_58	TRINITY_DN25912_c0_g1	protein OBERON 4 [Medicago truncatula]	OBE4	GO:0001708(cell fate specification);GO:0005515(protein binding);GO:0005634(nucleus);GO:0009880(embryonic pattern specification);GO:0046872(metal ion binding);GO:0090421(embryonic meristem initiation)	NA	893	10.5	NA	NA	4	0	0	33.7644	2.1684e-15	3.13149e-15	yes
PC-3p-78936_58	TRINITY_DN25994_c1_g2	DEAD-box ATP-dependent RNA helicase 42 [Medicago truncatula]	RH45	GO:0000398(mRNA splicing, via spliceosome);GO:0004004(ATP-dependent RNA helicase activity);GO:0010468(regulation of gene expression);GO:0010501(RNA secondary structure unwinding)	ko03040(Spliceosome)	660	7	2	3	3	282.372	91.6898	101.293	2.3162e-32	9.53434e-32	yes
PC-3p-83362_54	TRINITY_DN11981_c0_g1	AAA-ATPase At5g17760 [Medicago truncatula]	At5g17760	GO:0005524(ATP binding);GO:0005886(plasma membrane);GO:0016021(integral component of membrane);GO:0016887(ATPase activity)	NA	1359	13.5	4	4	NA	40.3388	30.5633	0	7.2896e-09	7.93241e-09	yes
PC-3p-83362_54	TRINITY_DN14139_c0_g3	hypothetical protein TSUD_405680 [Trifolium subterraneum]	-	NA	NA	667	9.5	2	NA	NA	80.6777	0	0	9.1449e-36	4.07513e-35	yes
PC-3p-83362_54	TRINITY_DN17313_c0_g1	Snf1-related kinase interactor 1, putative [Medicago truncatula]	HDR1	GO:0005634(nucleus);GO:0016301(kinase activity);GO:0016310(phosphorylation)	NA	1717	5	NA	NA	4	0	0	33.7644	2.1684e-15	3.13149e-15	yes
PC-3p-83362_54	TRINITY_DN19945_c0_g2	dof zinc finger protein DOF1.4 [Medicago truncatula]	DOF1.4	GO:0003677(DNA binding);GO:0003700(DNA binding transcription factor activity);GO:0005634(nucleus);GO:0006351(transcription, DNA-templated);GO:0006355(regulation of transcription, DNA-templated);GO:0046872(metal ion binding)	NA	1586	4.5	NA	NA	4	0	0	33.7644	2.1684e-15	3.13149e-15	yes
PC-3p-83362_54	TRINITY_DN21036_c0_g1	probable galacturonosyltransferase 15 isoform X1 [Medicago truncatula]	GAUT15	GO:0000139(Golgi membrane);GO:0005794(Golgi apparatus);GO:0016021(integral component of membrane);GO:0016051(carbohydrate biosynthetic process);GO:0016757(transferase activity, transferring glycosyl groups);GO:0016758(transferase activity, transferring hexosyl groups);GO:0045489(pectin biosynthetic process);GO:0047262(polygalacturonate 4-alpha-galacturonosyltransferase activity);GO:0071555(cell w…	NA	741	5	NA	4	NA	0	30.5633	0	5.326e-14	6.30988e-14	yes
PC-3p-83362_54	TRINITY_DN21237_c0_g2	PLASMODESMATA CALLOSE-BINDING PROTEIN 3 [Medicago truncatula]	PDCB2	NA	ko00500(Starch and sucrose metabolism)	857	9	4	NA	NA	40.3388	0	0	3.0257e-18	5.71521e-18	yes
PC-3p-83362_54	TRINITY_DN22199_c1_g1	BAG family molecular chaperone regulator [Medicago truncatula]	BAG3	GO:0005634(nucleus);GO:0051087(chaperone binding)	ko04141(Protein processing in endoplasmic reticulum)	444	3	NA	NA	4	0	0	33.7644	2.1684e-15	3.13149e-15	yes
PC-3p-83362_54	TRINITY_DN22739_c0_g1	uncharacterized protein LOC25495944 isoform X1 [Medicago truncatula]	polA	GO:0003887(DNA-directed DNA polymerase activity);GO:0005737(cytoplasm);GO:0006261(DNA-dependent DNA replication);GO:0008409(5'-3' exonuclease activity)	ko00230(Purine metabolism);ko00240(Pyrimidine metabolism);ko03030(DNA replication);ko03410(Base excision repair);ko03420(Nucleotide excision repair);ko03440(Homologous recombination)	1317	6.5	4	NA	NA	40.3388	0	0	3.0257e-18	5.71521e-18	yes
PC-3p-83362_54	TRINITY_DN22811_c0_g2	hypothetical protein GOBAR_DD28494 [Gossypium barbadense]	-	NA	ko00230(Purine metabolism);ko00240(Pyrimidine metabolism);ko03020(RNA polymerase)	464	11.5	3	3	3	7341.67	4248.3	911.639	0	0	yes
PC-3p-83362_54	TRINITY_DN25144_c1_g1	transcription factor bHLH155 [Medicago truncatula]	BHLH155	GO:0004674(protein serine/threonine kinase activity);GO:0005829(cytosol);GO:0006355(regulation of transcription, DNA-templated);GO:0006468(protein phosphorylation);GO:0035556(intracellular signal transduction)	NA	2853	11.5	NA	4	NA	0	30.5633	0	5.326e-14	6.30988e-14	yes
PC-3p-83362_54	TRINITY_DN25689_c0_g2	-	-	NA	NA	147	6.5	0	NA	NA	80.6777	0	0	9.1449e-36	4.07513e-35	yes
PC-3p-905_4408	TRINITY_DN12049_c0_g1	proteasome assembly chaperone 2 [Medicago truncatula]	psmg2	GO:0000502(proteasome complex);GO:0005634(nucleus);GO:0005829(cytosol);GO:0043248(proteasome assembly)	NA	384	8.5	2	2	NA	121.017	91.6898	0	3.8632e-25	1.00369e-24	yes
PC-3p-905_4408	TRINITY_DN12584_c0_g1	E3 ubiquitin-protein ligase UPL6 [Medicago truncatula]	UPL6	GO:0004842(ubiquitin-protein transferase activity);GO:0005634(nucleus);GO:0005737(cytoplasm)	ko04120(Ubiquitin mediated proteolysis)	328	8.5	2	NA	NA	121.017	0	0	2.761e-53	2.58192e-52	yes
PC-3p-905_4408	TRINITY_DN12908_c0_g3	-	-	NA	NA	224	1	NA	NA	4	0	0	33.7644	2.1684e-15	3.13149e-15	yes
PC-3p-905_4408	TRINITY_DN12948_c0_g1	centromere protein V [Medicago truncatula]	Cenpv	GO:0005575(cellular_component);GO:0008152(metabolic process);GO:0016846(carbon-sulfur lyase activity)	NA	275	8.5	NA	4	NA	0	30.5633	0	5.326e-14	6.30988e-14	yes
PC-3p-905_4408	TRINITY_DN13143_c0_g1	pathogenesis-related protein STH-2 isoform X1 [Medicago truncatula]	STH-2	GO:0004864(protein phosphatase inhibitor activity);GO:0005634(nucleus);GO:0005737(cytoplasm);GO:0009738(abscisic acid-activated signaling pathway);GO:0010427(abscisic acid binding);GO:0080163(regulation of protein serine/threonine phosphatase activity)	NA	325	6	2	2	2	242.033	1130.84	371.408	0	0	yes
PC-3p-905_4408	TRINITY_DN13282_c0_g1	transcription factor SRM1 [Medicago truncatula]	DIVARICATA	GO:0003677(DNA binding);GO:0003700(DNA binding transcription factor activity);GO:0005515(protein binding);GO:0005634(nucleus);GO:0006351(transcription, DNA-templated);GO:0006355(regulation of transcription, DNA-templated);GO:0009414(response to water deprivation);GO:0009651(response to salt stress);GO:0009738(abscisic acid-activated signaling pathway);GO:0009739(response to gibberellin);GO:000975…	NA	519	5	NA	2	NA	0	61.1266	0	2.8349e-27	7.6679e-27	yes
PC-3p-905_4408	TRINITY_DN13362_c0_g1	uncharacterized protein LOC11443924 [Medicago truncatula]	-	GO:0003674(molecular_function);GO:0008150(biological_process)	NA	2349	8.5	4	NA	NA	40.3388	0	0	3.0257e-18	5.71521e-18	yes
PC-3p-905_4408	TRINITY_DN13473_c0_g3	coiled-coil domain-containing protein SCD2 isoform X4 [Cicer arietinum]	SCD2	GO:0005737(cytoplasm);GO:0008150(biological_process)	NA	644	8.5	NA	NA	4	0	0	33.7644	2.1684e-15	3.13149e-15	yes
PC-3p-905_4408	TRINITY_DN13660_c0_g3	23 kDa jasmonate-induced protein-like [Spinacia oleracea]	-	NA	NA	145	9	3	3	3	242.033	427.886	168.822	1.9335e-28	6.21931e-28	yes
PC-3p-905_4408	TRINITY_DN13793_c0_g1	developmentally regulated g-protein 2-like protein, partial [Trifolium pratense]	DRG2	GO:0003924(GTPase activity);GO:0005525(GTP binding);GO:0005737(cytoplasm);GO:0016787(hydrolase activity);GO:0019003(GDP binding)	NA	591	8.5	NA	2	NA	0	61.1266	0	2.8349e-27	7.6679e-27	yes
PC-3p-905_4408	TRINITY_DN14241_c1_g1	Hsc70-interacting protein [Medicago truncatula]	At4g22670	GO:0005737(cytoplasm);GO:0005829(cytosol);GO:0046686(response to cadmium ion);GO:0046983(protein dimerization activity)	NA	1129	7.5	NA	3	NA	0	61.1266	0	2.8349e-27	7.6679e-27	yes
PC-3p-905_4408	TRINITY_DN14241_c1_g1	Hsc70-interacting protein [Medicago truncatula]	At4g22670	GO:0005737(cytoplasm);GO:0005829(cytosol);GO:0046686(response to cadmium ion);GO:0046983(protein dimerization activity)	NA	1189	7.5	4	NA	NA	40.3388	0	0	3.0257e-18	5.71521e-18	yes
PC-3p-905_4408	TRINITY_DN14458_c0_g1	probable inactive receptor kinase At5g58300 [Medicago truncatula]	At5g58300	GO:0004672(protein kinase activity);GO:0004674(protein serine/threonine kinase activity);GO:0005524(ATP binding);GO:0005886(plasma membrane);GO:0006468(protein phosphorylation);GO:0007169(transmembrane receptor protein tyrosine kinase signaling pathway);GO:0016021(integral component of membrane);GO:0016301(kinase activity)	NA	2354	6.5	NA	4	NA	0	30.5633	0	5.326e-14	6.30988e-14	yes
PC-3p-905_4408	TRINITY_DN14610_c0_g1	mediator of RNA polymerase II transcription subunit 19a [Medicago truncatula]	MED19A	GO:0005515(protein binding);GO:0005634(nucleus);GO:0006351(transcription, DNA-templated);GO:0008134(transcription factor binding);GO:0016592(mediator complex);GO:0045944(positive regulation of transcription by RNA polymerase II)	ko04145(Phagosome)	966	8	NA	2	NA	0	91.6898	0	1.508e-40	8.68797e-40	yes
PC-3p-905_4408	TRINITY_DN14657_c0_g1	putative DEAD-box ATP-dependent RNA helicase 29 [Medicago truncatula]	RH29	GO:0004004(ATP-dependent RNA helicase activity);GO:0010501(RNA secondary structure unwinding)	NA	1346	9.5	NA	3	NA	0	61.1266	0	2.8349e-27	7.6679e-27	yes
PC-3p-905_4408	TRINITY_DN14717_c0_g2	uncharacterized protein At4g04775-like [Medicago truncatula]	-	NA	NA	212	11.5	NA	NA	4	0	0	33.7644	2.1684e-15	3.13149e-15	yes
PC-3p-905_4408	TRINITY_DN14837_c0_g2	glycine-rich cell wall structural protein [Medicago truncatula]	-	NA	NA	290	7.5	NA	2	NA	0	61.1266	0	2.8349e-27	7.6679e-27	yes
PC-3p-905_4408	TRINITY_DN14932_c0_g1	ER membrane protein complex subunit 2 [Medicago truncatula]	oca3	GO:0005634(nucleus);GO:0005783(endoplasmic reticulum);GO:0005794(Golgi apparatus);GO:0008150(biological_process);GO:0016740(transferase activity)	NA	41	9.5	4	4	NA	40.3388	30.5633	0	7.2896e-09	7.93241e-09	yes
PC-3p-905_4408	TRINITY_DN15046_c0_g8	dnaJ homolog subfamily B member 13 [Medicago truncatula]	DNAJB4	GO:0005737(cytoplasm);GO:0006457(protein folding);GO:0051082(unfolded protein binding)	NA	613	8	NA	2	NA	0	61.1266	0	2.8349e-27	7.6679e-27	yes
PC-3p-905_4408	TRINITY_DN15076_c0_g3	abscisate beta-glucosyltransferase-like [Medicago truncatula]	AOG	GO:0009813(flavonoid biosynthetic process);GO:0043231(intracellular membrane-bounded organelle);GO:0052696(flavonoid glucuronidation);GO:0080043(quercetin 3-O-glucosyltransferase activity);GO:0080044(quercetin 7-O-glucosyltransferase activity)	ko00906(Carotenoid biosynthesis)	1228	9.5	2	2	3	201.694	947.462	67.5288	0	0	yes
PC-3p-905_4408	TRINITY_DN15385_c0_g2	probable ATP synthase 24 kDa subunit, mitochondrial [Medicago truncatula]	At2g21870	GO:0005507(copper ion binding);GO:0005730(nucleolus);GO:0005739(mitochondrion);GO:0005753(mitochondrial proton-transporting ATP synthase complex);GO:0008270(zinc ion binding);GO:0009507(chloroplast);GO:0009555(pollen development);GO:0016020(membrane);GO:0045263(proton-transporting ATP synthase complex, coupling factor F(o));GO:0050897(cobalt ion binding)	NA	486	8.5	2	2	4	121.017	91.6898	33.7644	3.7849e-11	4.32094e-11	yes
PC-3p-905_4408	TRINITY_DN15435_c0_g2	transmembrane and coiled-coil domain-containing protein 4 [Medicago truncatula]	TMCO4	GO:0003674(molecular_function);GO:0008150(biological_process);GO:0009507(chloroplast);GO:0016021(integral component of membrane)	NA	41	10.5	NA	2	2	0	91.6898	135.058	4.7583e-28	1.52068e-27	yes
PC-3p-905_4408	TRINITY_DN15900_c0_g2	protein ABC transporter 1, mitochondrial [Medicago truncatula]	ABC1	GO:0005215(transporter activity);GO:0005524(ATP binding);GO:0005739(mitochondrion);GO:0005743(mitochondrial inner membrane);GO:0005746(mitochondrial respiratory chain);GO:0006744(ubiquinone biosynthetic process);GO:0010224(response to UV-B);GO:0015996(chlorophyll catabolic process);GO:0016740(transferase activity);GO:0017004(cytochrome complex assembly)	NA	737	8.5	NA	NA	4	0	0	33.7644	2.1684e-15	3.13149e-15	yes
PC-3p-905_4408	TRINITY_DN16055_c2_g4	uncharacterized protein LOC11432572 [Medicago truncatula]	At3g19950	GO:0000209(protein polyubiquitination);GO:0043161(proteasome-mediated ubiquitin-dependent protein catabolic process);GO:0061630(ubiquitin protein ligase activity)	NA	477	7	NA	4	NA	0	30.5633	0	5.326e-14	6.30988e-14	yes
PC-3p-905_4408	TRINITY_DN16102_c0_g5	transcription factor TGA9 isoform X2 [Medicago truncatula]	-	NA	ko04075(Plant hormone signal transduction)	322	15	NA	NA	2	0	0	168.822	4.758e-74	1.04621e-72	yes
PC-3p-905_4408	TRINITY_DN16140_c1_g5	probable ribosome biogenesis protein RLP24 [Medicago truncatula]	At2g44860	GO:0000027(ribosomal large subunit assembly);GO:0003735(structural constituent of ribosome);GO:0006412(translation);GO:0022625(cytosolic large ribosomal subunit);GO:1902626(assembly of large subunit precursor of preribosome)	ko03010(Ribosome)	469	9	NA	2	4	0	122.253	33.7644	5.1464e-34	2.19706e-33	yes
PC-3p-905_4408	TRINITY_DN16444_c0_g1	crocetin glucosyltransferase, chloroplastic [Medicago truncatula]	UGT75L6	GO:0009813(flavonoid biosynthetic process);GO:0043231(intracellular membrane-bounded organelle);GO:0052696(flavonoid glucuronidation);GO:0080043(quercetin 3-O-glucosyltransferase activity);GO:0080044(quercetin 7-O-glucosyltransferase activity)	NA	703	6.5	4	NA	NA	40.3388	0	0	3.0257e-18	5.71521e-18	yes
PC-3p-905_4408	TRINITY_DN16559_c0_g5	F-box/kelch-repeat protein At5g43190 [Medicago truncatula]	At5g43190	GO:0004842(ubiquitin-protein transferase activity);GO:0019005(SCF ubiquitin ligase complex);GO:0031146(SCF-dependent proteasomal ubiquitin-dependent protein catabolic process)	NA	309	8.5	NA	NA	4	0	0	33.7644	2.1684e-15	3.13149e-15	yes
PC-3p-905_4408	TRINITY_DN16561_c0_g5	-	-	NA	NA	230	22	2	4	NA	80.6777	30.5633	0	3.6961e-20	8.81092e-20	yes
PC-3p-905_4408	TRINITY_DN16586_c0_g1	expansin-A8 [Medicago truncatula]	EXPA8	GO:0005576(extracellular region);GO:0005618(cell wall);GO:0006949(syncytium formation);GO:0009664(plant-type cell wall organization);GO:0009826(unidimensional cell growth);GO:0009828(plant-type cell wall loosening);GO:0009831(plant-type cell wall modification involved in multidimensional cell growth);GO:0016020(membrane)	NA	514	9	0	2	0	1008.47	61.1266	337.644	0	0	yes
PC-3p-905_4408	TRINITY_DN16638_c0_g1	polyadenylate-binding protein RBP47B' [Medicago truncatula]	RBP47B'	GO:0003723(RNA binding);GO:0003729(mRNA binding);GO:0005634(nucleus);GO:0005737(cytoplasm);GO:0006397(mRNA processing);GO:0008143(poly(A) binding)	ko03013(RNA transport)	939	6.5	4	NA	NA	40.3388	0	0	3.0257e-18	5.71521e-18	yes
PC-3p-905_4408	TRINITY_DN16950_c1_g5	3-ketoacyl-CoA synthase 10 isoform X1 [Medicago truncatula]	FDH	GO:0000038(very long-chain fatty acid metabolic process);GO:0005634(nucleus);GO:0005783(endoplasmic reticulum);GO:0005789(endoplasmic reticulum membrane);GO:0006633(fatty acid biosynthetic process);GO:0008610(lipid biosynthetic process);GO:0009409(response to cold);GO:0009416(response to light stimulus);GO:0009913(epidermal cell differentiation);GO:0016020(membrane);GO:0016021(integral component …	ko00062(Fatty acid elongation)	633	7	4	NA	NA	40.3388	0	0	3.0257e-18	5.71521e-18	yes
PC-3p-905_4408	TRINITY_DN16970_c0_g3	probable receptor-like protein kinase At5g18500 [Medicago truncatula]	At2g42960	GO:0004674(protein serine/threonine kinase activity);GO:0005524(ATP binding);GO:0005886(plasma membrane);GO:0016021(integral component of membrane);GO:0016301(kinase activity);GO:0046777(protein autophosphorylation)	NA	980	8	4	3	NA	40.3388	122.253	0	7.9994e-32	3.25637e-31	yes
PC-3p-905_4408	TRINITY_DN17206_c0_g2	carbamoylphosphate synthase small subunit [Medicago truncatula]	CARA	GO:0000050(urea cycle);GO:0004088(carbamoyl-phosphate synthase (glutamine-hydrolyzing) activity);GO:0005951(carbamoyl-phosphate synthase complex);GO:0006526(arginine biosynthetic process)	ko00240(Pyrimidine metabolism);ko00250(Alanine, aspartate and glutamate metabolism)	206	8.5	NA	NA	4	0	0	33.7644	2.1684e-15	3.13149e-15	yes
PC-3p-905_4408	TRINITY_DN17378_c0_g1	protein DETOXIFICATION 27 isoform X2 [Medicago truncatula]	DTX27	GO:0006855(drug transmembrane transport)	NA	1127	10.5	NA	NA	4	0	0	33.7644	2.1684e-15	3.13149e-15	yes
PC-3p-905_4408	TRINITY_DN17449_c0_g1	uncharacterized protein LOC25501693 [Medicago truncatula]	-	GO:0005575(cellular_component);GO:0008150(biological_process);GO:0016740(transferase activity)	NA	278	9.5	NA	NA	4	0	0	33.7644	2.1684e-15	3.13149e-15	yes
PC-3p-905_4408	TRINITY_DN17481_c1_g1	receptor-like kinase plant [Medicago truncatula]	At5g18500	GO:0004674(protein serine/threonine kinase activity);GO:0005524(ATP binding);GO:0005886(plasma membrane);GO:0016021(integral component of membrane);GO:0016301(kinase activity);GO:0046777(protein autophosphorylation)	NA	1127	8	NA	NA	2	0	0	67.5288	4.6985e-30	1.53517e-29	yes
PC-3p-905_4408	TRINITY_DN17646_c2_g3	probable RNA methyltransferase At5g51130 [Medicago truncatula]	At5g51130	GO:0005737(cytoplasm)	NA	950	9.5	NA	4	4	0	30.5633	33.7644	9.1976e-08	9.66516e-08	yes
PC-3p-905_4408	TRINITY_DN17653_c0_g2	-	-	NA	NA	255	8.5	NA	NA	2	0	0	135.058	2.2009e-59	2.88805e-58	yes
PC-3p-905_4408	TRINITY_DN18686_c0_g2	unknown [Medicago truncatula]	UGT76F1	GO:0009813(flavonoid biosynthetic process);GO:0043231(intracellular membrane-bounded organelle);GO:0052696(flavonoid glucuronidation);GO:0080043(quercetin 3-O-glucosyltransferase activity);GO:0080044(quercetin 7-O-glucosyltransferase activity)	ko00908(Zeatin biosynthesis)	1047	9	NA	2	NA	0	61.1266	0	2.8349e-27	7.6679e-27	yes
PC-3p-905_4408	TRINITY_DN18937_c0_g1	LOW QUALITY PROTEIN: PX domain-containing protein EREL1 [Medicago truncatula]	EREL1	GO:0005768(endosome);GO:0006897(endocytosis);GO:0016050(vesicle organization);GO:0019898(extrinsic component of membrane);GO:0035091(phosphatidylinositol binding)	NA	3347	12	NA	2	4	0	61.1266	33.7644	1.3397e-13	1.5644e-13	yes
PC-3p-905_4408	TRINITY_DN18991_c0_g1	GAMYB-binding protein [Medicago falcata]	SKIP	GO:0000350(generation of catalytic spliceosome for second transesterification step);GO:0000398(mRNA splicing, via spliceosome);GO:0003712(transcription cofactor activity);GO:0005515(protein binding);GO:0005634(nucleus);GO:0005730(nucleolus);GO:0006351(transcription, DNA-templated);GO:0006357(regulation of transcription by RNA polymerase II);GO:0008380(RNA splicing);GO:0009651(response to salt str…	ko03040(Spliceosome)	1785	8.5	NA	NA	4	0	0	33.7644	2.1684e-15	3.13149e-15	yes
PC-3p-905_4408	TRINITY_DN19035_c0_g1	biotin--protein ligase 2 [Medicago truncatula]	HCS1	GO:0003824(catalytic activity);GO:0004077(biotin-[acetyl-CoA-carboxylase] ligase activity);GO:0004078(biotin-[methylcrotonoyl-CoA-carboxylase] ligase activity);GO:0005524(ATP binding);GO:0005576(extracellular region);GO:0005829(cytosol);GO:0006464(cellular protein modification process);GO:0009507(chloroplast);GO:0009536(plastid);GO:0042966(biotin carboxyl carrier protein biosynthetic process)	ko00780(Biotin metabolism)	1501	6	NA	4	NA	0	30.5633	0	5.326e-14	6.30988e-14	yes
PC-3p-905_4408	TRINITY_DN19100_c0_g2	arabinosyltransferase RRA3 [Medicago truncatula]	RRA3	GO:0000139(Golgi membrane);GO:0005768(endosome);GO:0005794(Golgi apparatus);GO:0005802(trans-Golgi network);GO:0016021(integral component of membrane);GO:0016757(transferase activity, transferring glycosyl groups);GO:0042546(cell wall biogenesis);GO:0071555(cell wall organization);GO:0080147(root hair cell development)	ko00514(Other types of O-glycan biosynthesis)	339	7	NA	2	NA	0	61.1266	0	2.8349e-27	7.6679e-27	yes
PC-3p-905_4408	TRINITY_DN19352_c0_g1	ATP-dependent Clp protease proteolytic subunit-related protein 1, chloroplastic [Medicago truncatula]	CLPR1	GO:0003723(RNA binding);GO:0004252(serine-type endopeptidase activity);GO:0006364(rRNA processing);GO:0006396(RNA processing);GO:0006508(proteolysis);GO:0009507(chloroplast);GO:0009532(plastid stroma);GO:0009534(chloroplast thylakoid);GO:0009570(chloroplast stroma);GO:0009658(chloroplast organization);GO:0009840(chloroplastic endopeptidase Clp complex);GO:0009941(chloroplast envelope)	NA	904	9	2	2	2	443.727	489.013	540.23	0.0086503	0.00883412	yes
PC-3p-905_4408	TRINITY_DN19400_c0_g1	cation/H(+) antiporter 20 isoform X2 [Medicago truncatula]	CHX20	GO:0005451(monovalent cation:proton antiporter activity);GO:0006885(regulation of pH);GO:0012505(endomembrane system)	NA	2491	7.5	4	NA	4	40.3388	0	33.7644	5.8097e-09	6.43576e-09	yes
PC-3p-905_4408	TRINITY_DN19404_c0_g1	trehalase [Medicago truncatula]	TRE1	GO:0004555(alpha,alpha-trehalase activity);GO:0005993(trehalose catabolic process)	ko00500(Starch and sucrose metabolism)	1771	8.5	NA	3	2	0	61.1266	101.293	1.3456e-21	3.32027e-21	yes
PC-3p-905_4408	TRINITY_DN19447_c0_g1	DDRGK domain-containing protein 1 [Medicago truncatula]	At4g27120	GO:0005783(endoplasmic reticulum)	NA	292	9.5	NA	NA	4	0	0	33.7644	2.1684e-15	3.13149e-15	yes
PC-3p-905_4408	TRINITY_DN19453_c0_g1	trihelix transcription factor GT-3b [Medicago truncatula]	GT-3B	GO:0003700(DNA binding transcription factor activity);GO:0005515(protein binding);GO:0005634(nucleus);GO:0005730(nucleolus);GO:0006351(transcription, DNA-templated);GO:0006355(regulation of transcription, DNA-templated);GO:0016592(mediator complex);GO:0043565(sequence-specific DNA binding)	NA	497	7.5	NA	2	NA	0	152.816	0	4.2589e-67	7.03027e-66	yes
PC-3p-905_4408	TRINITY_DN19500_c1_g1	uncharacterized protein LOC25491320 [Medicago truncatula]	-	GO:0004462(lactoylglutathione lyase activity);GO:0005737(cytoplasm);GO:0005975(carbohydrate metabolic process);GO:0016829(lyase activity)	NA	893	9	NA	2	2	0	91.6898	101.293	7.7646e-22	1.93182e-21	yes
PC-3p-905_4408	TRINITY_DN19995_c0_g1	O-glucosyltransferase rumi homolog [Medicago truncatula]	-	GO:0006664(glycolipid metabolic process);GO:0012505(endomembrane system);GO:0046527(glucosyltransferase activity)	ko00514(Other types of O-glycan biosynthesis)	1256	10.5	NA	NA	4	0	0	33.7644	2.1684e-15	3.13149e-15	yes
PC-3p-905_4408	TRINITY_DN20010_c0_g2	40S ribosomal protein S5 [Medicago truncatula]	RPS5	GO:0000028(ribosomal small subunit assembly);GO:0003729(mRNA binding);GO:0003735(structural constituent of ribosome);GO:0006412(translation);GO:0019843(rRNA binding);GO:0022627(cytosolic small ribosomal subunit)	ko03010(Ribosome)	146	9	NA	2	4	0	91.6898	33.7644	4.639e-23	1.16692e-22	yes
PC-3p-905_4408	TRINITY_DN20133_c0_g5	pentatricopeptide repeat-containing protein At2g06000 [Medicago truncatula]	-	NA	NA	959	8.5	4	4	NA	40.3388	30.5633	0	7.2896e-09	7.93241e-09	yes
PC-3p-905_4408	TRINITY_DN20171_c1_g2	uncharacterized protein LOC25495110 [Medicago truncatula]	truB	GO:0006400(tRNA modification);GO:0009982(pseudouridine synthase activity);GO:1990481(mRNA pseudouridine synthesis)	NA	843	8	NA	4	2	0	30.5633	101.293	2.1117e-27	6.57705e-27	yes
PC-3p-905_4408	TRINITY_DN20380_c0_g2	BAG family molecular chaperone regulator 7 [Medicago truncatula]	BAG7	GO:0005515(protein binding);GO:0005516(calmodulin binding);GO:0005783(endoplasmic reticulum);GO:0005829(cytosol);GO:0005886(plasma membrane);GO:0006457(protein folding);GO:0009506(plasmodesma);GO:0009507(chloroplast);GO:0034605(cellular response to heat);GO:0034620(cellular response to unfolded protein);GO:0043207(response to external biotic stimulus);GO:0051087(chaperone binding);GO:0070417(cell…	NA	450	4.5	1	NA	2	201.694	0	67.5288	9.7066e-52	8.9088e-51	yes
PC-3p-905_4408	TRINITY_DN20598_c0_g3	COPII coat assembly protein SEC16 [Medicago truncatula]	-	GO:0003674(molecular_function);GO:0005634(nucleus);GO:0008150(biological_process)	NA	1130	7	NA	NA	4	0	0	33.7644	2.1684e-15	3.13149e-15	yes
PC-3p-905_4408	TRINITY_DN20650_c0_g3	probable manganese-transporting ATPase PDR2 [Medicago truncatula]	PDR2	GO:0005887(integral component of plasma membrane);GO:0006874(cellular calcium ion homeostasis);GO:0019829(cation-transporting ATPase activity);GO:0043231(intracellular membrane-bounded organelle)	NA	2619	7	4	NA	2	40.3388	0	101.293	1.1933e-24	3.06672e-24	yes
PC-3p-905_4408	TRINITY_DN20658_c0_g1	protein FAM133 [Medicago truncatula]	-	GO:0003674(molecular_function);GO:0005634(nucleus);GO:0008150(biological_process)	NA	372	8.5	2	2	2	242.033	152.816	270.115	4.4518e-08	4.82225e-08	yes
PC-3p-905_4408	TRINITY_DN20709_c0_g2	structural maintenance of chromosomes protein 3 [Medicago truncatula]	SMC3	GO:0000775(chromosome, centromeric region);GO:0000785(chromatin);GO:0003682(chromatin binding);GO:0005524(ATP binding);GO:0005634(nucleus);GO:0005737(cytoplasm);GO:0005819(spindle);GO:0006281(DNA repair);GO:0007059(chromosome segregation);GO:0007062(sister chromatid cohesion);GO:0008278(cohesin complex);GO:0009506(plasmodesma);GO:0016363(nuclear matrix);GO:0051301(cell division);GO:0051321(meioti…	NA	788	10	NA	3	NA	0	61.1266	0	2.8349e-27	7.6679e-27	yes
PC-3p-905_4408	TRINITY_DN20733_c0_g1	putative transcription regulator SAP family [Medicago truncatula]	RRC1	GO:0003723(RNA binding);GO:0005634(nucleus);GO:0006397(mRNA processing);GO:0008380(RNA splicing);GO:0016607(nuclear speck)	ko03040(Spliceosome)	2590	5	3	2	NA	80.6777	91.6898	0	1.1355e-19	2.68327e-19	yes
PC-3p-905_4408	TRINITY_DN20857_c0_g3	-	-	NA	NA	299	9.5	NA	NA	4	0	0	33.7644	2.1684e-15	3.13149e-15	yes
PC-3p-905_4408	TRINITY_DN21048_c0_g1	methyltransferase-like protein 1 [Medicago truncatula]	EMB1691	GO:0003676(nucleic acid binding);GO:0005515(protein binding);GO:0005634(nucleus);GO:0005737(cytoplasm);GO:0005829(cytosol);GO:0008168(methyltransferase activity);GO:0008757(S-adenosylmethionine-dependent methyltransferase activity);GO:0009793(embryo development ending in seed dormancy);GO:0032259(methylation);GO:0080009(mRNA methylation)	NA	1212	9.5	NA	NA	4	0	0	33.7644	2.1684e-15	3.13149e-15	yes
PC-3p-905_4408	TRINITY_DN21248_c0_g3	hypothetical protein TSUD_213350 [Trifolium subterraneum]	Armc7	GO:0005634(nucleus);GO:0005737(cytoplasm)	NA	424	8.5	NA	NA	2	0	0	67.5288	4.6985e-30	1.53517e-29	yes
PC-3p-905_4408	TRINITY_DN21355_c0_g1	inositol transporter [Medicago falcata]	INT2	GO:0005351(carbohydrate:proton symporter activity);GO:0005355(glucose transmembrane transporter activity);GO:0005887(integral component of plasma membrane);GO:0046323(glucose import)	NA	563	10	4	2	2	40.3388	152.816	101.293	9.3536e-15	1.33623e-14	yes
PC-3p-905_4408	TRINITY_DN21373_c0_g1	RNA polymerase Rpb4 [Medicago truncatula]	NRPD4	GO:0000288(nuclear-transcribed mRNA catabolic process, deadenylation-dependent decay);GO:0000932(P-body);GO:0003697(single-stranded DNA binding);GO:0003727(single-stranded RNA binding);GO:0003899(DNA-directed 5'-3' RNA polymerase activity);GO:0005665(DNA-directed RNA polymerase II, core complex);GO:0006367(transcription initiation from RNA polymerase II promoter);GO:0031369(translation initiation…	ko00230(Purine metabolism);ko00240(Pyrimidine metabolism);ko03020(RNA polymerase)	729	8	NA	NA	4	0	0	33.7644	2.1684e-15	3.13149e-15	yes
PC-3p-905_4408	TRINITY_DN21692_c0_g6	IAA-amino acid hydrolase ILR1-like 5 [Medicago truncatula]	ILL5	GO:0006508(proteolysis);GO:0008237(metallopeptidase activity);GO:0009850(auxin metabolic process);GO:0010178(IAA-amino acid conjugate hydrolase activity);GO:0046872(metal ion binding)	NA	824	9	NA	4	NA	0	30.5633	0	5.326e-14	6.30988e-14	yes
PC-3p-905_4408	TRINITY_DN21740_c0_g2	protein CHLORORESPIRATORY REDUCTION 6, chloroplastic [Medicago truncatula]	CRR6	GO:0003674(molecular_function);GO:0005634(nucleus);GO:0009507(chloroplast);GO:0009535(chloroplast thylakoid membrane);GO:0009570(chloroplast stroma);GO:0010275(NAD(P)H dehydrogenase complex assembly)	NA	659	8.5	NA	2	2	0	91.6898	67.5288	3.295e-19	7.53918e-19	yes
PC-3p-905_4408	TRINITY_DN21770_c0_g1	rust resistance kinase Lr10 [Medicago truncatula]	LRK10	GO:0005886(plasma membrane)	NA	1966	4.5	NA	NA	4	0	0	33.7644	2.1684e-15	3.13149e-15	yes
PC-3p-905_4408	TRINITY_DN21770_c0_g2	rust resistance kinase Lr10 [Medicago truncatula]	-	NA	NA	187	4.5	NA	NA	3	0	0	135.058	2.2009e-59	2.88805e-58	yes
PC-3p-905_4408	TRINITY_DN21837_c0_g7	filament-like plant protein isoform X2 [Medicago truncatula]	FPP	GO:0005515(protein binding);GO:0030674(protein binding, bridging);GO:0031410(cytoplasmic vesicle);GO:0060178(regulation of exocyst localization)	NA	1923	6.5	NA	4	NA	0	30.5633	0	5.326e-14	6.30988e-14	yes
PC-3p-905_4408	TRINITY_DN21940_c0_g3	uncharacterized protein LOC25490736 [Medicago truncatula]	-	GO:0003674(molecular_function);GO:0009507(chloroplast);GO:0009658(chloroplast organization);GO:0009793(embryo development ending in seed dormancy);GO:0010027(thylakoid membrane organization);GO:0016021(integral component of membrane);GO:0090056(regulation of chlorophyll metabolic process)	NA	600	8	4	2	NA	40.3388	183.38	0	8.2509e-55	1.01488e-53	yes
PC-3p-905_4408	TRINITY_DN22310_c0_g1	mediator of RNA polymerase II transcription subunit 4 [Medicago truncatula]	MED4	GO:0006357(regulation of transcription by RNA polymerase II);GO:0070847(core mediator complex)	NA	970	7	NA	4	NA	0	30.5633	0	5.326e-14	6.30988e-14	yes
PC-3p-905_4408	TRINITY_DN22398_c0_g1	protein SAWADEE HOMEODOMAIN HOMOLOG 1 [Medicago truncatula]	SHH1	GO:0003677(DNA binding);GO:0003682(chromatin binding);GO:0005634(nucleus);GO:0006306(DNA methylation);GO:0006346(methylation-dependent chromatin silencing);GO:0031047(gene silencing by RNA);GO:0046872(metal ion binding)	ko00563(Glycosylphosphatidylinositol(GPI)-anchor biosynthesis)	449	8.5	3	NA	NA	80.6777	0	0	9.1449e-36	4.07513e-35	yes
PC-3p-905_4408	TRINITY_DN22629_c0_g1	arginine/serine-rich splicing factor [Medicago truncatula]	-	NA	NA	1498	11.5	2	NA	NA	161.355	0	0	8.3268e-71	1.57284e-69	yes
PC-3p-905_4408	TRINITY_DN22662_c0_g2	uncharacterized protein LOC25491422 [Medicago truncatula]	-	GO:0005737(cytoplasm);GO:0008757(S-adenosylmethionine-dependent methyltransferase activity);GO:0032259(methylation)	NA	1397	5.5	4	2	NA	40.3388	427.886	0	0	0	yes
PC-3p-905_4408	TRINITY_DN22699_c1_g1	DNAJ protein JJJ1 homolog [Medicago truncatula]	JJJ1	GO:0003676(nucleic acid binding);GO:0005515(protein binding);GO:0005634(nucleus);GO:0006457(protein folding);GO:0008270(zinc ion binding)	NA	1071	7.5	NA	NA	3	0	0	67.5288	4.6985e-30	1.53517e-29	yes
PC-3p-905_4408	TRINITY_DN22775_c0_g2	probable xyloglucan galactosyltransferase GT20 [Medicago truncatula]	-	GO:0005509(calcium ion binding);GO:0005544(calcium-dependent phospholipid binding);GO:0005886(plasma membrane)	NA	324	8.5	NA	NA	4	0	0	33.7644	2.1684e-15	3.13149e-15	yes
PC-3p-905_4408	TRINITY_DN22842_c0_g1	activator of 90 kDa heat shock protein ATPase homolog [Medicago truncatula]	AHSA1	GO:0001671(ATPase activator activity);GO:0005634(nucleus);GO:0005829(cytosol);GO:0006950(response to stress);GO:0051087(chaperone binding)	NA	1041	18.5	4	NA	NA	40.3388	0	0	3.0257e-18	5.71521e-18	yes
PC-3p-905_4408	TRINITY_DN22842_c0_g1	activator of 90 kDa heat shock protein ATPase homolog [Medicago truncatula]	AHSA1	GO:0001671(ATPase activator activity);GO:0005634(nucleus);GO:0005829(cytosol);GO:0006950(response to stress);GO:0051087(chaperone binding)	NA	938	8.5	3	2	NA	80.6777	91.6898	0	1.1355e-19	2.68327e-19	yes
PC-3p-905_4408	TRINITY_DN23072_c2_g3	serine/threonine-protein kinase D6PK [Medicago truncatula]	Os06g0291600	GO:0004674(protein serine/threonine kinase activity);GO:0005634(nucleus);GO:0005737(cytoplasm);GO:0005886(plasma membrane);GO:0035556(intracellular signal transduction)	NA	2285	9.5	NA	4	4	0	30.5633	33.7644	9.1976e-08	9.66516e-08	yes
PC-3p-905_4408	TRINITY_DN23079_c1_g3	root phototropism protein 3 isoform X2 [Medicago truncatula]	RPT3	GO:0005886(plasma membrane);GO:0009416(response to light stimulus)	NA	1018	4.5	2	NA	2	121.017	0	101.293	1.9554e-25	5.10709e-25	yes
PC-3p-905_4408	TRINITY_DN23160_c0_g3	probable glutathione S-transferase [Medicago truncatula]	-	GO:0004364(glutathione transferase activity);GO:0005737(cytoplasm);GO:0006749(glutathione metabolic process);GO:0009407(toxin catabolic process)	ko00480(Glutathione metabolism)	349	7.5	2	2	2	766.438	1222.53	810.345	3.2154e-30	1.28956e-29	yes
PC-3p-905_4408	TRINITY_DN23284_c0_g1	putative zeaxanthin epoxidase [Medicago truncatula]	-	GO:0004497(monooxygenase activity);GO:0044550(secondary metabolite biosynthetic process)	ko00906(Carotenoid biosynthesis)	1036	12.5	2	2	2	242.033	152.816	303.88	1.7508e-11	2.00117e-11	yes
PC-3p-905_4408	TRINITY_DN23472_c0_g3	autophagy-related protein 11 [Medicago truncatula]	ATG11	GO:0000045(autophagosome assembly);GO:0001934(positive regulation of protein phosphorylation);GO:0019901(protein kinase binding);GO:0034045(phagophore assembly site membrane);GO:1990316(Atg1/ULK1 kinase complex)	ko04136(Autophagy - other eukaryotes)	3352	9.5	NA	4	NA	0	30.5633	0	5.326e-14	6.30988e-14	yes
PC-3p-905_4408	TRINITY_DN23495_c0_g1	plectin [Medicago truncatula]	-	GO:0003729(mRNA binding);GO:0005634(nucleus);GO:0005773(vacuole);GO:0005829(cytosol);GO:0005886(plasma membrane);GO:0008150(biological_process)	NA	1544	9	NA	4	NA	0	30.5633	0	5.326e-14	6.30988e-14	yes
PC-3p-905_4408	TRINITY_DN23663_c0_g1	protein STRICTOSIDINE SYNTHASE-LIKE 4 [Medicago truncatula]	SSL5	GO:0005783(endoplasmic reticulum);GO:0016020(membrane);GO:0016788(hydrolase activity, acting on ester bonds)	NA	864	9	NA	NA	2	0	0	135.058	2.2009e-59	2.88805e-58	yes
PC-3p-905_4408	TRINITY_DN24101_c0_g1	receptor-like serine/threonine-protein kinase At2g45590 [Medicago truncatula]	At2g45590	GO:0004674(protein serine/threonine kinase activity);GO:0005886(plasma membrane)	NA	767	10	NA	2	NA	0	91.6898	0	1.508e-40	8.68797e-40	yes
PC-3p-905_4408	TRINITY_DN24138_c0_g1	heterogeneous nuclear ribonucleoprotein [Medicago truncatula]	SYNCRIP	GO:0003723(RNA binding)	NA	479	7.5	NA	NA	2	0	0	101.293	1.0173e-44	7.03524e-44	yes
PC-3p-905_4408	TRINITY_DN24192_c0_g1	hypothetical protein TSUD_171260 [Trifolium subterraneum]	Os04g0338000	GO:0005737(cytoplasm);GO:0005829(cytosol);GO:0016491(oxidoreductase activity);GO:0046686(response to cadmium ion);GO:0055114(oxidation-reduction process)	ko00750(Vitamin ko6 metabolism)	476	8	NA	NA	2	0	0	101.293	1.0173e-44	7.03524e-44	yes
PC-3p-905_4408	TRINITY_DN24242_c0_g1	receptor-like kinase [Medicago truncatula]	LRK10	GO:0005886(plasma membrane)	NA	1373	10	NA	4	NA	0	30.5633	0	5.326e-14	6.30988e-14	yes
PC-3p-905_4408	TRINITY_DN24449_c1_g1	protein SLOW WALKER 1 [Medicago truncatula]	SWA1	GO:0000166(nucleotide binding);GO:0005634(nucleus);GO:0005730(nucleolus);GO:0006364(rRNA processing);GO:0007049(cell cycle);GO:0009553(embryo sac development);GO:0009561(megagametogenesis);GO:0051301(cell division);GO:0080008(Cul4-RING E3 ubiquitin ligase complex)	ko03008(Ribosome biogenesis in eukaryotes)	713	9	NA	NA	4	0	0	33.7644	2.1684e-15	3.13149e-15	yes
PC-3p-905_4408	TRINITY_DN24559_c1_g1	chloride channel protein ClC-D protein, putative [Medicago truncatula]	CLC-D	GO:0005247(voltage-gated chloride channel activity);GO:0005253(anion channel activity);GO:0005622(intracellular);GO:0005802(trans-Golgi network);GO:0009826(unidimensional cell growth);GO:0010038(response to metal ion);GO:0016021(integral component of membrane);GO:0030002(cellular anion homeostasis);GO:0034707(chloride channel complex);GO:0034765(regulation of ion transmembrane transport)	NA	2351	6.5	4	NA	2	40.3388	0	67.5288	1.1364e-14	1.60392e-14	yes
PC-3p-905_4408	TRINITY_DN24569_c0_g1	-	-	NA	NA	98	6	NA	3	NA	0	61.1266	0	2.8349e-27	7.6679e-27	yes
PC-3p-905_4408	TRINITY_DN24583_c1_g2	putative transcription factor WD40-like family [Medicago truncatula]	At1g62020	GO:0006886(intracellular protein transport);GO:0006888(ER to Golgi vesicle-mediated transport);GO:0006890(retrograde vesicle-mediated transport, Golgi to ER);GO:0006891(intra-Golgi vesicle-mediated transport);GO:0030126(COPI vesicle coat)	NA	2863	9	NA	4	NA	0	30.5633	0	5.326e-14	6.30988e-14	yes
PC-3p-905_4408	TRINITY_DN24631_c0_g1	phosphoglucan, water dikinase, chloroplastic [Medicago truncatula]	GWD3	GO:0003824(catalytic activity);GO:0005524(ATP binding);GO:0005975(carbohydrate metabolic process);GO:0005982(starch metabolic process);GO:0005983(starch catabolic process);GO:0009507(chloroplast);GO:0009536(plastid);GO:0009570(chloroplast stroma);GO:0016301(kinase activity);GO:0016310(phosphorylation);GO:0019200(carbohydrate kinase activity);GO:0046777(protein autophosphorylation);GO:0046872(meta…	NA	3180	10	4	4	NA	40.3388	30.5633	0	7.2896e-09	7.93241e-09	yes
PC-3p-905_4408	TRINITY_DN24758_c1_g4	-	-	NA	NA	448	10	NA	3	NA	0	91.6898	0	1.508e-40	8.68797e-40	yes
PC-3p-905_4408	TRINITY_DN24962_c0_g1	endoplasmin homolog [Medicago truncatula]	HSP90	GO:0005783(endoplasmic reticulum)	ko04141(Protein processing in endoplasmic reticulum);ko04626(Plant-pathogen interaction)	2489	7.5	4	NA	NA	40.3388	0	0	3.0257e-18	5.71521e-18	yes
PC-3p-905_4408	TRINITY_DN24976_c0_g1	9-cis-epoxycarotenoid dioxygenase NCED1, chloroplastic [Medicago truncatula]	NCED1	GO:0006970(response to osmotic stress);GO:0009414(response to water deprivation);GO:0009507(chloroplast);GO:0009535(chloroplast thylakoid membrane);GO:0009570(chloroplast stroma);GO:0009688(abscisic acid biosynthetic process);GO:0042538(hyperosmotic salinity response);GO:0045549(9-cis-epoxycarotenoid dioxygenase activity);GO:0046872(metal ion binding);GO:0055114(oxidation-reduction process)	ko00906(Carotenoid biosynthesis)	1570	10.5	NA	3	2	0	61.1266	101.293	1.3456e-21	3.32027e-21	yes
PC-3p-905_4408	TRINITY_DN25246_c1_g2	uncharacterized protein LOC25502133 [Medicago truncatula]	-	GO:0003674(molecular_function);GO:0005576(extracellular region);GO:0008150(biological_process)	NA	76	7	NA	NA	4	0	0	33.7644	2.1684e-15	3.13149e-15	yes
PC-3p-905_4408	TRINITY_DN25289_c0_g1	protein CROWDED NUCLEI 4 [Medicago truncatula]	CRWN4	GO:0005515(protein binding);GO:0005634(nucleus);GO:0005652(nuclear lamina);GO:0005654(nucleoplasm);GO:0005737(cytoplasm);GO:0006997(nucleus organization);GO:0008483(transaminase activity);GO:0009507(chloroplast);GO:0010369(chromocenter);GO:0031965(nuclear membrane);GO:0034399(nuclear periphery);GO:0097298(regulation of nucleus size)	ko00270(Cysteine and methionine metabolism);ko00280(Valine, leucine and isoleucine degradation);ko00290(Valine, leucine and isoleucine biosynthesis);ko00770(Pantothenate and CoA biosynthesis)	1712	17.5	NA	2	3	0	183.38	67.5288	2.1428e-45	1.74083e-44	yes
PC-3p-905_4408	TRINITY_DN25396_c0_g2	protein translocase subunit SecA, chloroplastic isoform X1 [Medicago truncatula]	secA	GO:0009306(protein secretion);GO:0015450(P-P-bond-hydrolysis-driven protein transmembrane transporter activity)	ko03060(Protein export)	2150	10	4	3	2	40.3388	61.1266	202.586	3.9486e-34	1.70876e-33	yes
PC-3p-905_4408	TRINITY_DN25451_c0_g1	RNA recognition motif-containing protein [Trifolium pratense]	-	GO:0003723(RNA binding);GO:0005634(nucleus);GO:0008150(biological_process)	ko03015(mRNA surveillance pathway)	293	9	2	3	4	282.372	122.253	33.7644	6.3253e-48	5.39664e-47	yes
PC-3p-905_4408	TRINITY_DN25692_c0_g5	ATP-dependent helicase BRM [Medicago truncatula]	BRM	GO:0003677(DNA binding);GO:0003682(chromatin binding);GO:0004386(helicase activity);GO:0005515(protein binding);GO:0005524(ATP binding);GO:0005634(nucleus);GO:0005829(cytosol);GO:0006351(transcription, DNA-templated);GO:0006355(regulation of transcription, DNA-templated);GO:0007275(multicellular organism development);GO:0008094(DNA-dependent ATPase activity);GO:0010050(vegetative phase change);GO…	NA	300	7	NA	NA	4	0	0	33.7644	2.1684e-15	3.13149e-15	yes
PC-3p-905_4408	TRINITY_DN25703_c0_g1	putative protein phosphatase 2C-like protein 44 isoform X2 [Medicago truncatula]	At3g23360	GO:0004722(protein serine/threonine phosphatase activity);GO:0005575(cellular_component);GO:0006470(protein dephosphorylation);GO:0046872(metal ion binding)	NA	103	8.5	NA	2	NA	0	61.1266	0	2.8349e-27	7.6679e-27	yes
PC-3p-905_4408	TRINITY_DN25709_c1_g10	probable boron transporter 2 [Medicago truncatula]	BOR2	GO:0005887(integral component of plasma membrane);GO:0008509(anion transmembrane transporter activity);GO:0051453(regulation of intracellular pH);GO:0098656(anion transmembrane transport)	NA	2239	9	4	4	NA	40.3388	30.5633	0	7.2896e-09	7.93241e-09	yes
PC-3p-905_4408	TRINITY_DN25860_c0_g1	COP1-interactive protein 1 [Medicago truncatula]	-	GO:0003779(actin binding);GO:0005773(vacuole);GO:0005774(vacuolar membrane);GO:0008150(biological_process)	NA	2396	6	NA	4	NA	0	30.5633	0	5.326e-14	6.30988e-14	yes
PC-3p-905_4408	TRINITY_DN25881_c0_g1	uncharacterized protein LOC11437083 isoform X1 [Medicago truncatula]	-	GO:0005774(vacuolar membrane);GO:0005783(endoplasmic reticulum);GO:0005794(Golgi apparatus);GO:0016021(integral component of membrane)	NA	675	6	2	3	2	201.694	61.1266	101.293	1.738e-19	4.10191e-19	yes
PC-3p-905_4408	TRINITY_DN26206_c3_g1	DEAD-box ATP-dependent RNA helicase 21 [Medicago truncatula]	RH21	GO:0000375(RNA splicing, via transesterification reactions);GO:0004004(ATP-dependent RNA helicase activity);GO:0005682(U5 snRNP);GO:0010501(RNA secondary structure unwinding);GO:0071013(catalytic step 2 spliceosome)	ko03040(Spliceosome)	689	20	2	3	NA	161.355	61.1266	0	1.3616e-39	7.65858e-39	yes
PC-3p-905_4408	TRINITY_DN26328_c2_g3	putative THO complex, subunitTHOC2 protein [Medicago truncatula]	-	NA	ko03040(Spliceosome);ko03013(RNA transport)	89	9	NA	4	NA	0	30.5633	0	5.326e-14	6.30988e-14	yes
PC-3p-905_4408	TRINITY_DN26356_c2_g1	LOW QUALITY PROTEIN: hypothetical protein GLYMA_13G023600 [Glycine max]	ART2	GO:0003690(double-stranded DNA binding);GO:0003700(DNA binding transcription factor activity);GO:0008134(transcription factor binding);GO:0008283(cell proliferation);GO:0009303(rRNA transcription)	NA	1834	6	2	2	3	2097.62	1039.15	236.351	0	0	yes
PC-3p-97186_44	TRINITY_DN12650_c0_g1	dehydration-responsive element-binding protein 3 [Medicago truncatula]	DREB3	GO:0003677(DNA binding);GO:0003700(DNA binding transcription factor activity);GO:0005634(nucleus);GO:0006351(transcription, DNA-templated);GO:0006355(regulation of transcription, DNA-templated);GO:0009873(ethylene-activated signaling pathway);GO:0043565(sequence-specific DNA binding);GO:0045893(positive regulation of transcription, DNA-templated)	NA	612	9.5	NA	2	NA	0	61.1266	0	2.8349e-27	7.6679e-27	yes
PC-3p-97186_44	TRINITY_DN14863_c0_g1	translation initiation factor eIF-2B subunit gamma [Medicago truncatula]	eif2b3	GO:0005737(cytoplasm)	ko03013(RNA transport)	600	7	NA	NA	2	0	0	67.5288	4.6985e-30	1.53517e-29	yes
PC-3p-97186_44	TRINITY_DN15040_c0_g2	glyceraldehyde-3-phosphate dehydrogenase A, chloroplastic [Medicago truncatula]	GAPA1	GO:0005515(protein binding);GO:0005829(cytosol);GO:0006006(glucose metabolic process);GO:0006096(glycolytic process);GO:0009409(response to cold);GO:0009416(response to light stimulus);GO:0009507(chloroplast);GO:0009535(chloroplast thylakoid membrane);GO:0009570(chloroplast stroma);GO:0009744(response to sucrose);GO:0009941(chloroplast envelope);GO:0010319(stromule);GO:0016020(membrane);GO:001925…	ko00710(Carbon fixation in photosynthetic organisms)	1732	4.5	4	3	NA	40.3388	122.253	0	7.9994e-32	3.25637e-31	yes
PC-3p-97186_44	TRINITY_DN15250_c0_g1	uncharacterized protein LOC11439344 isoform X1 [Medicago truncatula]	-	GO:0005737(cytoplasm);GO:0009507(chloroplast)	NA	2051	6.5	2	2	NA	242.033	152.816	0	3.6073e-50	3.23776e-49	yes
PC-3p-97186_44	TRINITY_DN15739_c1_g1	Heat shock 70 kDa protein 4L [Cajanus cajan]	HSP70-14	GO:0005515(protein binding);GO:0005524(ATP binding);GO:0005634(nucleus);GO:0005737(cytoplasm);GO:0005829(cytosol);GO:0005886(plasma membrane);GO:0006457(protein folding);GO:0009408(response to heat);GO:0046686(response to cadmium ion)	NA	516	8	NA	NA	3	0	0	101.293	1.0173e-44	7.03524e-44	yes
PC-3p-97186_44	TRINITY_DN15758_c0_g1	probable protein phosphatase 2C 59 [Medicago truncatula]	WIN2	GO:0004722(protein serine/threonine phosphatase activity);GO:0005886(plasma membrane);GO:0006470(protein dephosphorylation);GO:0042742(defense response to bacterium);GO:0044419(interspecies interaction between organisms);GO:0046872(metal ion binding)	NA	1060	9	2	NA	4	121.017	0	33.7644	1.4877e-33	6.23662e-33	yes
PC-3p-97186_44	TRINITY_DN15889_c0_g1	prostaglandin E synthase 2 [Medicago truncatula]	ptges2	GO:0005739(mitochondrion);GO:0009055(electron transfer activity);GO:0015035(protein disulfide oxidoreductase activity);GO:0016740(transferase activity);GO:0045454(cell redox homeostasis);GO:0050220(prostaglandin-E synthase activity)	ko00590(Arachidonic acid metabolism)	786	7.5	NA	4	NA	0	30.5633	0	5.326e-14	6.30988e-14	yes
PC-3p-97186_44	TRINITY_DN16645_c0_g1	haloacid dehalogenase-like hydrolase domain-containing protein At2g33255 isoform X1 [Medicago truncatula]	At2g33255	GO:0016311(dephosphorylation);GO:0016791(phosphatase activity)	NA	803	4.5	NA	2	NA	0	91.6898	0	1.508e-40	8.68797e-40	yes
PC-3p-97186_44	TRINITY_DN18198_c0_g3	uncharacterized protein LOC11446172 [Medicago truncatula]	-	NA	NA	507	5	NA	4	NA	0	30.5633	0	5.326e-14	6.30988e-14	yes
PC-3p-97186_44	TRINITY_DN18922_c0_g2	chaperone protein dnaJ 50 [Medicago truncatula]	C50	GO:0005737(cytoplasm)	NA	831	6.5	4	3	2	40.3388	61.1266	135.058	2.2257e-14	3.13204e-14	yes
PC-3p-97186_44	TRINITY_DN19020_c0_g2	sarcoplasmic reticulum histidine-rich calcium-binding protein [Medicago truncatula]	-	NA	NA	347	24.5	2	3	3	121.017	152.816	101.293	0.0044924	0.0045928	yes
PC-3p-97186_44	TRINITY_DN19981_c0_g1	60S ribosomal protein L5 [Medicago truncatula]	RPL5	GO:0000027(ribosomal large subunit assembly);GO:0003735(structural constituent of ribosome);GO:0006412(translation);GO:0008097(5S rRNA binding);GO:0022625(cytosolic large ribosomal subunit)	ko03010(Ribosome)	288	12	4	3	NA	40.3388	213.943	0	6.0324e-67	9.74596e-66	yes
PC-3p-97186_44	TRINITY_DN20115_c0_g4	unknown [Medicago truncatula]	GAPC1	GO:0003677(DNA binding);GO:0004365(glyceraldehyde-3-phosphate dehydrogenase (NAD+) (phosphorylating) activity);GO:0005507(copper ion binding);GO:0005515(protein binding);GO:0005634(nucleus);GO:0005737(cytoplasm);GO:0005739(mitochondrion);GO:0005740(mitochondrial envelope);GO:0005774(vacuolar membrane);GO:0005794(Golgi apparatus);GO:0005829(cytosol);GO:0005886(plasma membrane);GO:0006094(gluconeog…	ko00010(Glycolysis / Gluconeogenesis);ko00710(Carbon fixation in photosynthetic organisms)	456	8.5	NA	3	2	0	61.1266	337.644	0	0	yes
PC-3p-97186_44	TRINITY_DN20222_c1_g1	pyridoxal 5'-phosphate synthase subunit PDX1.3 [Medicago truncatula]	PDX13	GO:0005515(protein binding);GO:0005737(cytoplasm);GO:0005829(cytosol);GO:0005886(plasma membrane);GO:0006520(cellular amino acid metabolic process);GO:0006979(response to oxidative stress);GO:0006982(response to lipid hydroperoxide);GO:0008615(pyridoxine biosynthetic process);GO:0009651(response to salt stress);GO:0010224(response to UV-B);GO:0010335(response to non-ionic osmotic stress);GO:00125…	ko00750(Vitamin ko6 metabolism)	645	7.5	NA	3	NA	0	183.38	0	2.2612e-80	5.85342e-79	yes
PC-3p-97186_44	TRINITY_DN20412_c0_g1	uncharacterized protein LOC11441644 [Medicago truncatula]	-	GO:0005794(Golgi apparatus);GO:0005886(plasma membrane);GO:0008168(methyltransferase activity);GO:0016021(integral component of membrane);GO:0032259(methylation)	NA	661	11	NA	4	NA	0	30.5633	0	5.326e-14	6.30988e-14	yes
PC-3p-97186_44	TRINITY_DN20903_c1_g1	NADH dehydrogenase [ubiquinone] iron-sulfur protein 7, mitochondrial [Medicago truncatula]	At5g11770	GO:0005739(mitochondrion);GO:0005747(mitochondrial respiratory chain complex I);GO:0006120(mitochondrial electron transport, NADH to ubiquinone);GO:0008137(NADH dehydrogenase (ubiquinone) activity);GO:0008270(zinc ion binding);GO:0015990(electron transport coupled proton transport);GO:0048038(quinone binding);GO:0051539(4 iron, 4 sulfur cluster binding);GO:0055114(oxidation-reduction process)	ko00190(Oxidative phosphorylation)	333	8	NA	3	4	0	61.1266	33.7644	1.3397e-13	1.5644e-13	yes
PC-3p-97186_44	TRINITY_DN21307_c0_g1	histone-lysine N-methyltransferase ASHH3 isoform X2 [Medicago truncatula]	ASHH3	GO:0000775(chromosome, centromeric region);GO:0005634(nucleus);GO:0005783(endoplasmic reticulum);GO:0009506(plasmodesma);GO:0016279(protein-lysine N-methyltransferase activity);GO:0018024(histone-lysine N-methyltransferase activity)	ko00310(Lysine degradation)	892	9	NA	4	NA	0	30.5633	0	5.326e-14	6.30988e-14	yes
PC-3p-97186_44	TRINITY_DN21664_c0_g1	phosphatidylinositol 4-kinase gamma 5 [Medicago truncatula]	PI4KG7	GO:0004430(1-phosphatidylinositol 4-kinase activity);GO:0005524(ATP binding);GO:0005575(cellular_component);GO:0016301(kinase activity);GO:0016310(phosphorylation);GO:0046777(protein autophosphorylation);GO:0046854(phosphatidylinositol phosphorylation)	ko03008(Ribosome biogenesis in eukaryotes)	1525	8	NA	4	NA	0	30.5633	0	5.326e-14	6.30988e-14	yes
PC-3p-97186_44	TRINITY_DN21905_c1_g1	oligopeptidase A [Medicago truncatula]	OOP	GO:0004222(metalloendopeptidase activity);GO:0006518(peptide metabolic process);GO:0009507(chloroplast)	NA	1776	8	NA	NA	4	0	0	33.7644	2.1684e-15	3.13149e-15	yes
PC-3p-97186_44	TRINITY_DN22373_c0_g3	zinc finger protein ZAT5 [Medicago truncatula]	ZAT5	GO:0003700(DNA binding transcription factor activity);GO:0005634(nucleus);GO:0043565(sequence-specific DNA binding);GO:0044212(transcription regulatory region DNA binding)	NA	514	10.5	0	NA	NA	80.6777	0	0	9.1449e-36	4.07513e-35	yes
PC-3p-97186_44	TRINITY_DN22399_c0_g4	chalcone synthase 1 [Cicer arietinum]	CHS5	GO:0009715(chalcone biosynthetic process);GO:0016210(naringenin-chalcone synthase activity)	ko00941(Flavonoid biosynthesis);ko04712(Circadian rhythm - plant)	158	9	NA	2	NA	0	122.253	0	8.0164e-54	8.78795e-53	yes
PC-3p-97186_44	TRINITY_DN22502_c0_g1	Isocitrate lyase and phosphorylmutase [Medicago truncatula]	Dml	GO:0005737(cytoplasm);GO:0006097(glyoxylate cycle);GO:0046912(transferase activity, transferring acyl groups, acyl groups converted into alkyl on transfer)	NA	38	4.5	4	NA	NA	40.3388	0	0	3.0257e-18	5.71521e-18	yes
PC-3p-97186_44	TRINITY_DN22614_c0_g1	CBL-interacting serine/threonine-protein kinase 3 [Medicago truncatula]	CIPK3	GO:0004674(protein serine/threonine kinase activity);GO:0005634(nucleus);GO:0005737(cytoplasm);GO:0006468(protein phosphorylation);GO:0035556(intracellular signal transduction)	NA	681	9.5	NA	4	NA	0	30.5633	0	5.326e-14	6.30988e-14	yes
PC-3p-97186_44	TRINITY_DN23088_c0_g1	D-lactate dehydrogenase [cytochrome], mitochondrial [Medicago truncatula]	DLD	GO:0004458(D-lactate dehydrogenase (cytochrome) activity);GO:0005524(ATP binding);GO:0005739(mitochondrion);GO:0008720(D-lactate dehydrogenase activity);GO:0008891(glycolate oxidase activity);GO:0019154(glycolate dehydrogenase activity);GO:0042802(identical protein binding);GO:0050660(flavin adenine dinucleotide binding);GO:0051596(methylglyoxal catabolic process);GO:0055114(oxidation-reduction p…	ko00620(Pyruvate metabolism)	1070	7.5	2	NA	NA	161.355	0	0	8.3268e-71	1.57284e-69	yes
PC-3p-97186_44	TRINITY_DN23222_c0_g2	protein ENHANCED DOWNY MILDEW 2 [Medicago truncatula]	EDM2	GO:0003700(DNA binding transcription factor activity);GO:0005634(nucleus);GO:0007165(signal transduction);GO:0009911(positive regulation of flower development);GO:0010228(vegetative to reproductive phase transition of meristem);GO:0050832(defense response to fungus)	NA	646	10.5	4	NA	NA	40.3388	0	0	3.0257e-18	5.71521e-18	yes
PC-3p-97186_44	TRINITY_DN23650_c0_g1	uncharacterized protein LOC11407199 [Medicago truncatula]	-	GO:0003674(molecular_function);GO:0005634(nucleus);GO:0008150(biological_process)	NA	631	10	NA	NA	4	0	0	33.7644	2.1684e-15	3.13149e-15	yes
PC-3p-97186_44	TRINITY_DN23773_c0_g1	putative The fantastic four family protein [Medicago truncatula]	At5g22090	GO:0003674(molecular_function);GO:0008150(biological_process);GO:0009507(chloroplast)	NA	933	5.5	NA	3	NA	0	61.1266	0	2.8349e-27	7.6679e-27	yes
PC-3p-97186_44	TRINITY_DN23995_c0_g1	GTP-binding elongation factor Tu family protein [Medicago truncatula]	REFA1	GO:0003746(translation elongation factor activity);GO:0003924(GTPase activity);GO:0005622(intracellular)	ko03013(RNA transport)	425	8.5	3	2	3	80.6777	336.196	135.058	1.6777e-43	1.14152e-42	yes
PC-3p-97186_44	TRINITY_DN24616_c0_g1	NAC domain-containing protein 2 [Medicago truncatula]	NAC002	GO:0003677(DNA binding);GO:0003700(DNA binding transcription factor activity);GO:0005634(nucleus);GO:0006351(transcription, DNA-templated);GO:0006355(regulation of transcription, DNA-templated);GO:0007275(multicellular organism development);GO:0009611(response to wounding);GO:0009788(negative regulation of abscisic acid-activated signaling pathway)	NA	1096	5.5	NA	NA	2	0	0	135.058	2.2009e-59	2.88805e-58	yes
PC-3p-97186_44	TRINITY_DN24896_c0_g2	uridine-cytidine kinase C isoform X3 [Medicago truncatula]	udkC	GO:0004849(uridine kinase activity);GO:0005829(cytosol);GO:0006206(pyrimidine nucleobase metabolic process);GO:0043097(pyrimidine nucleoside salvage)	NA	2544	6	3	3	NA	80.6777	61.1266	0	5.3091e-17	9.81985e-17	yes
PC-3p-97186_44	TRINITY_DN25046_c0_g1	hypothetical protein TSUD_110870 [Trifolium subterraneum]	UCH2	GO:0004843(thiol-dependent ubiquitin-specific protease activity);GO:0005737(cytoplasm);GO:0016579(protein deubiquitination)	NA	1174	11.5	NA	NA	2	0	0	135.058	2.2009e-59	2.88805e-58	yes
PC-3p-97186_44	TRINITY_DN25108_c1_g1	calcium-transporting ATPase 2, plasma membrane-type [Medicago truncatula]	ACA2	GO:0005388(calcium-transporting ATPase activity);GO:0005887(integral component of plasma membrane);GO:0043231(intracellular membrane-bounded organelle)	NA	432	10.5	NA	4	NA	0	30.5633	0	5.326e-14	6.30988e-14	yes
PC-3p-97186_44	TRINITY_DN25307_c1_g2	zinc finger CCCH domain-containing protein 19 [Medicago truncatula]	NERD	GO:0005634(nucleus);GO:0005829(cytosol)	ko00565(Ether lipid metabolism)	2971	15.5	NA	NA	4	0	0	33.7644	2.1684e-15	3.13149e-15	yes
PC-3p-97186_44	TRINITY_DN25576_c0_g1	peptidyl-prolyl cis-trans isomerase-like protein [Medicago truncatula]	CYP59	GO:0003755(peptidyl-prolyl cis-trans isomerase activity)	NA	450	7	NA	4	NA	0	30.5633	0	5.326e-14	6.30988e-14	yes
PC-3p-97186_44	TRINITY_DN26210_c1_g2	FIP1[V]-like protein isoform X2 [Medicago truncatula]	FIPS5	GO:0003723(RNA binding);GO:0005515(protein binding);GO:0005634(nucleus)	ko03015(mRNA surveillance pathway)	2598	7.5	4	4	NA	40.3388	30.5633	0	7.2896e-09	7.93241e-09	yes
PC-3p-97186_44	TRINITY_DN26441_c3_g4	LRR and NB-ARC domain disease resistance protein [Medicago truncatula]	At1g61180	GO:0005524(ATP binding);GO:0005886(plasma membrane);GO:0006952(defense response);GO:0007165(signal transduction);GO:0016021(integral component of membrane);GO:0043531(ADP binding)	ko04626(Plant-pathogen interaction)	1028	8.5	4	NA	NA	40.3388	0	0	3.0257e-18	5.71521e-18	yes
PC-3p-97186_44	TRINITY_DN9582_c0_g1	unknown [Glycine max]	-	NA	NA	281	10	NA	NA	4	0	0	33.7644	2.1684e-15	3.13149e-15	yes
PC-5p-104515_39	TRINITY_DN13761_c0_g1	-	-	NA	NA	83	12	NA	NA	2	0	0	67.5288	4.6985e-30	1.53517e-29	yes
PC-5p-104515_39	TRINITY_DN21448_c0_g1	ribose-phosphate pyrophosphokinase 1 [Medicago truncatula]	PRS1	GO:0000287(magnesium ion binding);GO:0004749(ribose phosphate diphosphokinase activity);GO:0005524(ATP binding);GO:0009116(nucleoside metabolic process);GO:0009156(ribonucleoside monophosphate biosynthetic process);GO:0009165(nucleotide biosynthetic process);GO:0009507(chloroplast);GO:0016301(kinase activity);GO:0016310(phosphorylation);GO:0016757(transferase activity, transferring glycosyl group…	ko00030(Pentose phosphate pathway);ko00230(Purine metabolism)	703	10.5	4	NA	NA	40.3388	0	0	3.0257e-18	5.71521e-18	yes
PC-5p-104515_39	TRINITY_DN21514_c1_g2	-	-	NA	NA	90	10	NA	4	NA	0	30.5633	0	5.326e-14	6.30988e-14	yes
PC-5p-104515_39	TRINITY_DN22008_c0_g2	topless-related protein 4 isoform X2 [Medicago truncatula]	TPR4	GO:0005515(protein binding);GO:0005634(nucleus);GO:0005829(cytosol);GO:0006351(transcription, DNA-templated);GO:0006355(regulation of transcription, DNA-templated);GO:0010072(primary shoot apical meristem specification)	NA	857	12.5	NA	NA	2	0	0	67.5288	4.6985e-30	1.53517e-29	yes
PC-5p-104515_39	TRINITY_DN23865_c0_g1	DDT domain-containing protein PTM [Medicago truncatula]	PTM	GO:0003677(DNA binding);GO:0005634(nucleus);GO:0006355(regulation of transcription, DNA-templated)	NA	3050	9	2	NA	NA	80.6777	0	0	9.1449e-36	4.07513e-35	yes
PC-5p-109732_37	TRINITY_DN17214_c1_g2	-	-	NA	NA	61	5	NA	NA	4	0	0	33.7644	2.1684e-15	3.13149e-15	yes
PC-5p-109732_37	TRINITY_DN18159_c0_g2	F-box/WD-40 repeat-containing protein At5g21040 [Medicago truncatula]	At5g21040	GO:0003674(molecular_function);GO:0005737(cytoplasm);GO:0016036(cellular response to phosphate starvation);GO:0019005(SCF ubiquitin ligase complex)	ko00860(Porphyrin and chlorophyll metabolism);ko00900(Terpenoid backbone biosynthesis)	3028	16.5	4	3	NA	40.3388	61.1266	0	3.9437e-13	4.56816e-13	yes
PC-5p-109732_37	TRINITY_DN21647_c0_g1	uncharacterized protein LOC25500798 [Medicago truncatula]	-	GO:0005739(mitochondrion);GO:0005768(endosome);GO:0005794(Golgi apparatus);GO:0005802(trans-Golgi network);GO:0009058(biosynthetic process);GO:0009507(chloroplast);GO:0016757(transferase activity, transferring glycosyl groups)	NA	2781	6	2	4	2	161.355	30.5633	135.058	8.4454e-20	2.00821e-19	yes
PC-5p-109732_37	TRINITY_DN22003_c0_g2	unknown [Medicago truncatula]	EMB2024	GO:0002229(defense response to oomycetes);GO:0003824(catalytic activity);GO:0005515(protein binding);GO:0005777(peroxisome);GO:0005829(cytosol);GO:0005975(carbohydrate metabolic process);GO:0009051(pentose-phosphate shunt, oxidative branch);GO:0009507(chloroplast);GO:0009536(plastid);GO:0009570(chloroplast stroma);GO:0009793(embryo development ending in seed dormancy);GO:0017057(6-phosphogluconol…	ko00030(Pentose phosphate pathway)	64	8	NA	NA	3	0	0	67.5288	4.6985e-30	1.53517e-29	yes
PC-5p-109732_37	TRINITY_DN22933_c1_g2	-	-	NA	NA	529	11	NA	2	2	0	91.6898	101.293	7.7646e-22	1.93182e-21	yes
PC-5p-122516_31	TRINITY_DN16485_c0_g1	uncharacterized protein LOC11412267 [Medicago truncatula]	-	GO:0005768(endosome);GO:0005794(Golgi apparatus);GO:0005802(trans-Golgi network);GO:0016021(integral component of membrane);GO:0020037(heme binding)	NA	1279	14	NA	4	NA	0	30.5633	0	5.326e-14	6.30988e-14	yes
PC-5p-122516_31	TRINITY_DN19208_c0_g2	probable serine/threonine-protein kinase WNK10 isoform X1 [Medicago truncatula]	WNK4	GO:0004674(protein serine/threonine kinase activity);GO:0005829(cytosol);GO:0006468(protein phosphorylation);GO:0035556(intracellular signal transduction)	NA	2168	6	NA	NA	2	0	0	67.5288	4.6985e-30	1.53517e-29	yes
PC-5p-19253_324	TRINITY_DN14660_c0_g1	uncharacterized protein LOC25499859 [Medicago truncatula]	-	GO:0005575(cellular_component)	NA	290	9.5	4	3	4	40.3388	152.816	33.7644	1.9379e-26	5.15596e-26	yes
PC-5p-19253_324	TRINITY_DN15797_c0_g1	molybdate-anion transporter [Medicago truncatula]	mfsd5	GO:0005768(endosome);GO:0005794(Golgi apparatus);GO:0005802(trans-Golgi network);GO:0005886(plasma membrane);GO:0015098(molybdate ion transmembrane transporter activity);GO:0015689(molybdate ion transport);GO:0016021(integral component of membrane)	NA	930	6.5	NA	NA	4	0	0	33.7644	2.1684e-15	3.13149e-15	yes
PC-5p-19253_324	TRINITY_DN16954_c0_g1	folate synthesis bifunctional protein, mitochondrial [Medicago truncatula]	MitHPPK/DHPS	GO:0000287(magnesium ion binding);GO:0003848(2-amino-4-hydroxy-6-hydroxymethyldihydropteridine diphosphokinase activity);GO:0004156(dihydropteroate synthase activity);GO:0005739(mitochondrion);GO:0046656(folic acid biosynthetic process)	ko00790(Folate biosynthesis)	1144	8.5	4	NA	NA	40.3388	0	0	3.0257e-18	5.71521e-18	yes
PC-5p-19253_324	TRINITY_DN18770_c0_g2	-	-	NA	NA	517	9	NA	NA	4	0	0	33.7644	2.1684e-15	3.13149e-15	yes
PC-5p-19253_324	TRINITY_DN19096_c0_g1	protein NUCLEAR FUSION DEFECTIVE 4 [Medicago truncatula]	-	GO:0002239(response to oomycetes);GO:0003674(molecular_function);GO:0009506(plasmodesma);GO:0009507(chloroplast);GO:0016021(integral component of membrane);GO:0055085(transmembrane transport)	NA	1631	7	3	4	3	121.017	30.5633	67.5288	5.0235e-13	5.81008e-13	yes
PC-5p-19253_324	TRINITY_DN23919_c0_g2	unknown [Medicago truncatula]	-	GO:0005886(plasma membrane);GO:0006810(transport);GO:0022857(transmembrane transporter activity)	NA	205	15	NA	NA	4	0	0	33.7644	2.1684e-15	3.13149e-15	yes
PC-5p-19253_324	TRINITY_DN24097_c0_g1	putative 4-alpha-glucanotransferase [Medicago truncatula]	DPE2	GO:0000023(maltose metabolic process);GO:0000025(maltose catabolic process);GO:0004134(4-alpha-glucanotransferase activity);GO:0005829(cytosol);GO:0005976(polysaccharide metabolic process);GO:0005983(starch catabolic process);GO:0009507(chloroplast);GO:0010297(heteropolysaccharide binding);GO:0102500(beta-maltose 4-alpha-glucanotransferase activity);GO:2001070(starch binding)	ko00500(Starch and sucrose metabolism)	699	7.5	3	NA	2	121.017	0	135.058	8.789e-29	2.84233e-28	yes
PC-5p-19253_324	TRINITY_DN24652_c1_g3	DNA topoisomerase 1 alpha [Medicago truncatula]	TOP1B	GO:0003917(DNA topoisomerase type I activity);GO:0005730(nucleolus);GO:0006260(DNA replication);GO:0006265(DNA topological change);GO:0006338(chromatin remodeling);GO:0007059(chromosome segregation);GO:0031298(replication fork protection complex)	NA	1542	5	2	NA	NA	161.355	0	0	8.3268e-71	1.57284e-69	yes
PC-5p-19253_324	TRINITY_DN25020_c0_g2	protein NRT1/ PTR FAMILY 6.3 [Medicago truncatula]	NPF6.3	GO:0005215(transporter activity);GO:0005515(protein binding);GO:0005886(plasma membrane);GO:0006857(oligopeptide transport);GO:0009414(response to water deprivation);GO:0009635(response to herbicide);GO:0009734(auxin-activated signaling pathway);GO:0010167(response to nitrate);GO:0015112(nitrate transmembrane transporter activity);GO:0015293(symporter activity);GO:0015706(nitrate transport);GO:00…	NA	1588	8	NA	2	NA	0	91.6898	0	1.508e-40	8.68797e-40	yes
PC-5p-19253_324	TRINITY_DN690_c0_g1	hypothetical protein MtrunA17_Chr5g0443671 [Medicago truncatula]	-	NA	NA	485	8.5	NA	1	NA	0	61.1266	0	2.8349e-27	7.6679e-27	yes
PC-5p-193867_16	TRINITY_DN11866_c0_g1	heavy metal-associated isoprenylated plant protein 9 [Medicago truncatula]	HIPP09	GO:0005737(cytoplasm);GO:0030001(metal ion transport);GO:0046914(transition metal ion binding);GO:0046916(cellular transition metal ion homeostasis)	NA	279	27.5	NA	NA	4	0	0	33.7644	2.1684e-15	3.13149e-15	yes
PC-5p-193867_16	TRINITY_DN12005_c1_g2	glycine-rich RNA-binding protein RZ1A-like [Medicago truncatula]	RZ1A	GO:0000166(nucleotide binding);GO:0003677(DNA binding);GO:0003723(RNA binding);GO:0003729(mRNA binding);GO:0005634(nucleus);GO:0005737(cytoplasm);GO:0005829(cytosol);GO:0008270(zinc ion binding);GO:0009409(response to cold);GO:0009631(cold acclimation)	ko03040(Spliceosome)	444	6	2	4	4	121.017	30.5633	33.7644	3.0333e-19	6.99095e-19	yes
PC-5p-193867_16	TRINITY_DN14366_c0_g1	sulfite exporter TauE/SafE family protein 3 isoform X1 [Medicago truncatula]	-	GO:0009507(chloroplast);GO:0016021(integral component of membrane)	NA	215	10.5	NA	NA	4	0	0	33.7644	2.1684e-15	3.13149e-15	yes
PC-5p-193867_16	TRINITY_DN14479_c0_g1	peroxiredoxin-2E, chloroplastic [Medicago truncatula]	PRXIIE	GO:0004601(peroxidase activity);GO:0009505(plant-type cell wall);GO:0009507(chloroplast);GO:0009536(plastid);GO:0009570(chloroplast stroma);GO:0009579(thylakoid);GO:0009941(chloroplast envelope);GO:0016209(antioxidant activity);GO:0042742(defense response to bacterium);GO:0045454(cell redox homeostasis);GO:0051920(peroxiredoxin activity);GO:0055114(oxidation-reduction process)	NA	553	8.5	2	3	2	282.372	122.253	270.115	4.5835e-16	8.44212e-16	yes
PC-5p-193867_16	TRINITY_DN14515_c0_g1	probable prolyl 4-hydroxylase 7 [Medicago truncatula]	P4H7	GO:0005576(extracellular region);GO:0016706(oxidoreductase activity, acting on paired donors, with incorporation or reduction of molecular oxygen, 2-oxoglutarate as one donor, and incorporation of one atom each of oxygen into both donors);GO:0018401(peptidyl-proline hydroxylation to 4-hydroxy-L-proline)	ko00330(Arginine and proline metabolism)	841	15	2	2	2	121.017	122.253	67.5288	8.0775e-05	8.33736e-05	yes
PC-5p-193867_16	TRINITY_DN17950_c0_g1	hypothetical protein TSUD_164550 [Trifolium subterraneum]	Dctpp1	GO:0005737(cytoplasm);GO:0009143(nucleoside triphosphate catabolic process);GO:0046872(metal ion binding);GO:0047429(nucleoside-triphosphate diphosphatase activity)	ko00240(Pyrimidine metabolism)	202	9	2	NA	NA	121.017	0	0	2.761e-53	2.58192e-52	yes
PC-5p-193867_16	TRINITY_DN18717_c0_g1	two-component response regulator ARR9 [Cajanus cajan]	ARR9	GO:0000156(phosphorelay response regulator activity);GO:0000160(phosphorelay signal transduction system);GO:0005515(protein binding);GO:0005634(nucleus);GO:0006351(transcription, DNA-templated);GO:0006355(regulation of transcription, DNA-templated);GO:0007623(circadian rhythm);GO:0009735(response to cytokinin);GO:0009736(cytokinin-activated signaling pathway)	ko04075(Plant hormone signal transduction)	1962	5	4	NA	NA	40.3388	0	0	3.0257e-18	5.71521e-18	yes
PC-5p-193867_16	TRINITY_DN18950_c0_g1	receptor-like serine/threonine-protein kinase At4g25390 [Medicago truncatula]	At2g45590	GO:0004674(protein serine/threonine kinase activity);GO:0005886(plasma membrane)	NA	1293	8	4	2	4	40.3388	122.253	33.7644	7.4366e-17	1.37304e-16	yes
PC-5p-193867_16	TRINITY_DN19280_c0_g2	uncharacterized protein LOC25487391 [Medicago truncatula]	-	GO:0003674(molecular_function);GO:0008150(biological_process);GO:0009507(chloroplast);GO:0016021(integral component of membrane)	ko04146(Peroxisome)	725	9.5	3	3	2	161.355	213.943	270.115	1.0641e-06	1.11081e-06	yes
PC-5p-193867_16	TRINITY_DN19758_c0_g1	uncharacterized protein LOC11442362 [Medicago truncatula]	-	GO:0008942(nitrite reductase [NAD(P)H] activity);GO:0009507(chloroplast);GO:0009534(chloroplast thylakoid);GO:0009535(chloroplast thylakoid membrane);GO:0009941(chloroplast envelope);GO:0010207(photosystem II assembly);GO:0042128(nitrate assimilation);GO:0042549(photosystem II stabilization);GO:0051537(2 iron, 2 sulfur cluster binding);GO:0055114(oxidation-reduction process)	NA	1361	6	NA	3	NA	0	61.1266	0	2.8349e-27	7.6679e-27	yes
PC-5p-193867_16	TRINITY_DN22127_c0_g1	10 kDa chaperonin, mitochondrial [Cicer arietinum]	CPN10	GO:0005759(mitochondrial matrix);GO:0006986(response to unfolded protein);GO:0046872(metal ion binding);GO:0051082(unfolded protein binding);GO:0051085(chaperone cofactor-dependent protein refolding);GO:0051087(chaperone binding)	NA	703	8	NA	4	2	0	30.5633	67.5288	6.4851e-16	1.17172e-15	yes
PC-5p-193867_16	TRINITY_DN23024_c0_g1	ATP sulfurylase 2 [Medicago truncatula]	APS2	GO:0000103(sulfate assimilation);GO:0004020(adenylylsulfate kinase activity)	ko00920(Sulfur metabolism);ko00230(Purine metabolism);ko00450(Selenocompound metabolism);ko00261(Monobactam biosynthesis)	566	19	2	2	NA	80.6777	152.816	0	2.4359e-33	1.01741e-32	yes
PC-5p-193867_16	TRINITY_DN23195_c0_g1	exocyst subunit exo70 family protein [Medicago truncatula]	EXO70B1	GO:0000145(exocyst);GO:0005515(protein binding);GO:0005737(cytoplasm);GO:0005829(cytosol);GO:0005886(plasma membrane);GO:0006887(exocytosis);GO:0006904(vesicle docking involved in exocytosis);GO:0009414(response to water deprivation);GO:0009789(positive regulation of abscisic acid-activated signaling pathway);GO:0012505(endomembrane system);GO:0042742(defense response to bacterium);GO:0045335(pha…	NA	758	8	NA	4	NA	0	30.5633	0	5.326e-14	6.30988e-14	yes
PC-5p-193867_16	TRINITY_DN24033_c0_g1	putative transcription factor MYB/SANT family [Medicago truncatula]	dnajc2	GO:0003677(DNA binding);GO:0005634(nucleus);GO:0006342(chromatin silencing);GO:0006457(protein folding);GO:0009793(embryo development ending in seed dormancy);GO:0009909(regulation of flower development);GO:0042393(histone binding);GO:0043130(ubiquitin binding);GO:0048366(leaf development);GO:0051301(cell division);GO:1902182(shoot apical meristem development)	NA	1497	11	NA	NA	3	0	0	67.5288	4.6985e-30	1.53517e-29	yes
PC-5p-193867_16	TRINITY_DN24290_c0_g1	uncharacterized protein LOC11436208 [Medicago truncatula]	-	GO:0005575(cellular_component);GO:0016787(hydrolase activity)	NA	1486	6.5	NA	NA	4	0	0	33.7644	2.1684e-15	3.13149e-15	yes
PC-5p-193867_16	TRINITY_DN24441_c0_g1	plant intracellular Ras-group-related LRR protein 4 [Medicago truncatula]	PIRL4	GO:0005634(nucleus);GO:0005886(plasma membrane);GO:0007165(signal transduction)	NA	320	6.5	NA	NA	4	0	0	33.7644	2.1684e-15	3.13149e-15	yes
PC-5p-193867_16	TRINITY_DN24527_c0_g2	putative transcription factor bHLH family [Medicago truncatula]	PIF4	GO:0003677(DNA binding);GO:0003700(DNA binding transcription factor activity);GO:0005515(protein binding);GO:0005634(nucleus);GO:0006351(transcription, DNA-templated);GO:0006355(regulation of transcription, DNA-templated);GO:0009585(red, far-red light phototransduction);GO:0009704(de-etiolation);GO:0010017(red or far-red light signaling pathway);GO:0010161(red light signaling pathway);GO:0010244(…	ko04075(Plant hormone signal transduction)	1083	8.5	2	2	NA	242.033	397.323	0	1.9057e-82	5.41295e-81	yes
PC-5p-193867_16	TRINITY_DN24758_c1_g4	-	-	NA	NA	422	8.5	2	NA	NA	282.372	0	0	0	0	yes
PC-5p-193867_16	TRINITY_DN25114_c0_g2	receptor protein kinase TMK1 [Medicago truncatula]	TMK1	GO:0004675(transmembrane receptor protein serine/threonine kinase activity);GO:0005515(protein binding);GO:0005524(ATP binding);GO:0005576(extracellular region);GO:0005886(plasma membrane);GO:0006468(protein phosphorylation);GO:0007165(signal transduction);GO:0016021(integral component of membrane)	NA	1375	7.5	NA	NA	2	0	0	67.5288	4.6985e-30	1.53517e-29	yes
PC-5p-193867_16	TRINITY_DN25822_c0_g3	copia-type polyprotein, partial [Trifolium pratense]	-	NA	ko00040(Pentose and glucuronate interconversions)	83	8.5	4	NA	NA	40.3388	0	0	3.0257e-18	5.71521e-18	yes
PC-5p-193867_16	TRINITY_DN26164_c1_g4	P-loop NTPase domain-containing protein LPA1 homolog 1 [Medicago truncatula]	At5g60760	GO:0005634(nucleus);GO:0010264(myo-inositol hexakisphosphate biosynthetic process);GO:0016787(hydrolase activity)	NA	226	8	4	NA	NA	40.3388	0	0	3.0257e-18	5.71521e-18	yes
PC-5p-193867_16	TRINITY_DN26194_c1_g4	-	-	NA	NA	208	8	NA	2	NA	0	91.6898	0	1.508e-40	8.68797e-40	yes
PC-5p-21436_288	TRINITY_DN25549_c2_g1	protein CELLULOSE SYNTHASE INTERACTIVE 1 [Medicago truncatula]	CSI1	GO:0005634(nucleus);GO:0005737(cytoplasm)	NA	6356	8	4	3	4	40.3388	61.1266	33.7644	0.010824	0.0109988	yes
PC-5p-21436_288	TRINITY_DN26088_c1_g2	caffeic acid O-methyltransferase [Medicago truncatula]	7OMT	GO:0005829(cytosol);GO:0008171(O-methyltransferase activity);GO:0008757(S-adenosylmethionine-dependent methyltransferase activity);GO:0019438(aromatic compound biosynthetic process)	ko00940(Phenylpropanoid biosynthesis)	742	9.5	2	2	2	19039.9	17329.4	39234.2	0	0	yes
PC-5p-228754_12	TRINITY_DN14070_c0_g2	hypothetical protein MtrunA17_Chr3g0127871 [Medicago truncatula]	-	GO:0003674(molecular_function);GO:0005634(nucleus);GO:0008150(biological_process)	NA	385	6.5	NA	NA	4	0	0	33.7644	2.1684e-15	3.13149e-15	yes
PC-5p-228754_12	TRINITY_DN16213_c0_g2	protein STABILIZED1 [Medicago truncatula]	STA1	GO:0000244(spliceosomal tri-snRNP complex assembly);GO:0046540(U4/U6 x U5 tri-snRNP complex);GO:0071013(catalytic step 2 spliceosome);GO:0080188(RNA-directed DNA methylation);GO:2000630(positive regulation of miRNA metabolic process);GO:2000636(positive regulation of primary miRNA processing)	ko03040(Spliceosome)	495	13.5	NA	NA	2	0	0	101.293	1.0173e-44	7.03524e-44	yes
PC-5p-228754_12	TRINITY_DN22221_c0_g2	SEC14 cytosolic factor isoform X2 [Medicago truncatula]	SEC14	GO:0005215(transporter activity);GO:0005794(Golgi apparatus);GO:0006810(transport)	NA	848	9.5	NA	4	4	0	30.5633	33.7644	9.1976e-08	9.66516e-08	yes
PC-5p-228754_12	TRINITY_DN26154_c1_g1	granule-bound starch synthase 1, chloroplastic/amyloplastic [Medicago truncatula]	-	GO:0004373(glycogen (starch) synthase activity);GO:0005515(protein binding);GO:0009011(starch synthase activity);GO:0009507(chloroplast);GO:0009569(chloroplast starch grain);GO:0016757(transferase activity, transferring glycosyl groups);GO:0019252(starch biosynthetic process);GO:0102502(ADP-glucose-starch glucosyltransferase activity)	ko00500(Starch and sucrose metabolism)	220	26.5	NA	4	3	0	30.5633	168.822	1.3213e-53	1.41046e-52	yes
PC-5p-239905_12	TRINITY_DN14223_c0_g1	glucan endo-1,3-beta-glucosidase 14 [Medicago truncatula]	At4g29360	GO:0004553(hydrolase activity, hydrolyzing O-glycosyl compounds);GO:0030247(polysaccharide binding);GO:0046658(anchored component of plasma membrane)	ko00500(Starch and sucrose metabolism)	1191	10.5	2	2	4	80.6777	61.1266	33.7644	7.567e-05	7.81823e-05	yes
PC-5p-239905_12	TRINITY_DN18709_c0_g2	FGGY carbohydrate kinase domain-containing protein [Cajanus cajan]	fggy	GO:0005737(cytoplasm);GO:0016310(phosphorylation);GO:0016773(phosphotransferase activity, alcohol group as acceptor)	ko00040(Pentose and glucuronate interconversions)	979	7.5	NA	2	NA	0	61.1266	0	2.8349e-27	7.6679e-27	yes
PC-5p-239905_12	TRINITY_DN18889_c0_g2	protein RTF2 homolog [Medicago truncatula]	RTFDC1	GO:0000380(alternative mRNA splicing, via spliceosome);GO:0003674(molecular_function);GO:0005634(nucleus);GO:0071171(site-specific DNA replication termination at RTS1 barrier);GO:1902979(mitotic DNA replication termination)	NA	918	7	4	2	3	40.3388	489.013	135.058	0	0	yes
PC-5p-239905_12	TRINITY_DN21423_c0_g2	cytochrome P450 90A1 [Medicago truncatula]	CYP90A1	GO:0004497(monooxygenase activity);GO:0007275(multicellular organism development);GO:0010268(brassinosteroid homeostasis);GO:0016125(sterol metabolic process);GO:0016132(brassinosteroid biosynthetic process)	ko00905(Brassinosteroid biosynthesis)	560	4.5	4	NA	NA	40.3388	0	0	3.0257e-18	5.71521e-18	yes
PC-5p-239905_12	TRINITY_DN22918_c0_g6	uncharacterized protein LOC11416475 [Medicago truncatula]	-	GO:0003674(molecular_function);GO:0008150(biological_process);GO:0009507(chloroplast);GO:0016021(integral component of membrane)	NA	687	9	NA	4	NA	0	30.5633	0	5.326e-14	6.30988e-14	yes
PC-5p-27381_220	TRINITY_DN12769_c0_g1	late embryogenesis abundant protein D-34 [Medicago truncatula]	-	GO:0003674(molecular_function);GO:0005634(nucleus);GO:0005730(nucleolus);GO:0005737(cytoplasm);GO:0005829(cytosol);GO:0006873(cellular ion homeostasis);GO:0006970(response to osmotic stress);GO:0009414(response to water deprivation);GO:0009737(response to abscisic acid);GO:0009793(embryo development ending in seed dormancy);GO:0009845(seed germination);GO:0010226(response to lithium ion)	NA	195	6.5	NA	4	NA	0	30.5633	0	5.326e-14	6.30988e-14	yes
PC-5p-27381_220	TRINITY_DN12871_c0_g1	potassium efflux antiporter, partial [Medicago truncatula]	KEA2	GO:0009507(chloroplast);GO:0009658(chloroplast organization);GO:0009941(chloroplast envelope);GO:0010109(regulation of photosynthesis);GO:0015079(potassium ion transmembrane transporter activity);GO:0015386(potassium:proton antiporter activity);GO:0016020(membrane);GO:0016021(integral component of membrane);GO:0031969(chloroplast membrane)	NA	908	6.5	NA	4	4	0	30.5633	33.7644	9.1976e-08	9.66516e-08	yes
PC-5p-27381_220	TRINITY_DN15784_c2_g2	hypothetical protein VIGAN_01005700 [Vigna angularis var. angularis]	CML26	GO:0005509(calcium ion binding)	ko04626(Plant-pathogen interaction)	344	7	NA	3	NA	0	61.1266	0	2.8349e-27	7.6679e-27	yes
PC-5p-27381_220	TRINITY_DN15837_c1_g5	putative clathrin assembly protein At5g35200 [Medicago truncatula]	At5g35200	GO:0005545(1-phosphatidylinositol binding);GO:0005794(Golgi apparatus);GO:0005886(plasma membrane);GO:0005905(clathrin-coated pit);GO:0006897(endocytosis);GO:0030136(clathrin-coated vesicle);GO:0030276(clathrin binding);GO:0048268(clathrin coat assembly)	NA	1014	6	NA	4	NA	0	30.5633	0	5.326e-14	6.30988e-14	yes
PC-5p-27381_220	TRINITY_DN17952_c0_g1	serine hydroxymethyltransferase 4-like [Abrus precatorius]	SHM4	GO:0004372(glycine hydroxymethyltransferase activity);GO:0005515(protein binding);GO:0005737(cytoplasm);GO:0005829(cytosol);GO:0005886(plasma membrane);GO:0006544(glycine metabolic process);GO:0006563(L-serine metabolic process);GO:0007623(circadian rhythm);GO:0009506(plasmodesma);GO:0016020(membrane);GO:0019264(glycine biosynthetic process from serine);GO:0030170(pyridoxal phosphate binding);GO:…	ko00630(Glyoxylate and dicarboxylate metabolism);ko00260(Glycine, serine and threonine metabolism);ko00460(Cyanoamino acid metabolism);ko00670(One carbon pool by folate)	621	12	NA	4	NA	0	30.5633	0	5.326e-14	6.30988e-14	yes
PC-5p-27381_220	TRINITY_DN18389_c0_g1	pyruvate kinase isozyme A, chloroplastic [Medicago truncatula]	-	GO:0000287(magnesium ion binding);GO:0004743(pyruvate kinase activity);GO:0005524(ATP binding);GO:0005829(cytosol);GO:0006096(glycolytic process);GO:0006629(lipid metabolic process);GO:0009507(chloroplast);GO:0009570(chloroplast stroma);GO:0010431(seed maturation);GO:0016301(kinase activity);GO:0030955(potassium ion binding);GO:0046686(response to cadmium ion)	ko00010(Glycolysis / Gluconeogenesis);ko00620(Pyruvate metabolism);ko00230(Purine metabolism)	1250	9.5	2	NA	4	80.6777	0	33.7644	2.0412e-19	4.72738e-19	yes
PC-5p-27381_220	TRINITY_DN20407_c0_g1	aldehyde dehydrogenase family 2 member B7, mitochondrial [Medicago truncatula]	ALDH2B7	GO:0004029(aldehyde dehydrogenase (NAD) activity)	ko00010(Glycolysis / Gluconeogenesis);ko00053(Ascorbate and aldarate metabolism);ko00620(Pyruvate metabolism);ko00071(Fatty acid degradation);ko00561(Glycerolipid metabolism);ko00280(Valine, leucine and isoleucine degradation);ko00310(Lysine degradation);ko00330(Arginine and proline metabolism);ko00340(Histidine metabolism);ko00380(Tryptophan metabolism);ko00410(beta-Alanine metabolism);ko00903(L…	1051	5.5	4	NA	4	40.3388	0	33.7644	5.8097e-09	6.43576e-09	yes
PC-5p-27381_220	TRINITY_DN21463_c0_g3	receptor-like protein kinase FERONIA [Medicago truncatula]	FER	GO:0004672(protein kinase activity);GO:0004674(protein serine/threonine kinase activity);GO:0005515(protein binding);GO:0005524(ATP binding);GO:0005576(extracellular region);GO:0005886(plasma membrane);GO:0007338(single fertilization);GO:0009506(plasmodesma);GO:0009723(response to ethylene);GO:0009738(abscisic acid-activated signaling pathway);GO:0009741(response to brassinosteroid);GO:0009742(br…	NA	367	7	NA	3	4	0	91.6898	33.7644	4.639e-23	1.16692e-22	yes
PC-5p-27381_220	TRINITY_DN21923_c0_g2	vesicle transport v-SNARE 12 isoform X1 [Medicago truncatula]	VTI12	GO:0000149(SNARE binding);GO:0005484(SNAP receptor activity);GO:0005789(endoplasmic reticulum membrane);GO:0005794(Golgi apparatus);GO:0006623(protein targeting to vacuole);GO:0006888(ER to Golgi vesicle-mediated transport);GO:0006891(intra-Golgi vesicle-mediated transport);GO:0006896(Golgi to vacuole transport);GO:0012507(ER to Golgi transport vesicle membrane);GO:0031201(SNARE complex);GO:00319…	ko04130(SNARE interactions in vesicular transport)	621	4.5	NA	2	NA	0	61.1266	0	2.8349e-27	7.6679e-27	yes
PC-5p-27381_220	TRINITY_DN22837_c0_g1	carbonic anhydrase 2 isoform X1 [Medicago truncatula]	-	GO:0004089(carbonate dehydratase activity);GO:0005737(cytoplasm);GO:0005829(cytosol);GO:0008270(zinc ion binding);GO:0009507(chloroplast);GO:0009535(chloroplast thylakoid membrane);GO:0009570(chloroplast stroma);GO:0009941(chloroplast envelope);GO:0015976(carbon utilization);GO:0042742(defense response to bacterium);GO:0048046(apoplast)	ko00910(Nitrogen metabolism)	219	6.5	NA	3	NA	0	61.1266	0	2.8349e-27	7.6679e-27	yes
PC-5p-27381_220	TRINITY_DN22880_c0_g1	F-box protein At1g47056 [Medicago truncatula]	FBL8	GO:0004842(ubiquitin-protein transferase activity);GO:0005634(nucleus);GO:0006511(ubiquitin-dependent protein catabolic process);GO:0016567(protein ubiquitination)	NA	1000	4.5	NA	2	4	0	122.253	33.7644	5.1464e-34	2.19706e-33	yes
PC-5p-27381_220	TRINITY_DN23900_c0_g1	PX domain-containing protein EREX isoform X1 [Medicago truncatula]	EREX	GO:0005768(endosome);GO:0006897(endocytosis);GO:0016050(vesicle organization);GO:0019898(extrinsic component of membrane);GO:0035091(phosphatidylinositol binding)	NA	1967	8.5	NA	4	3	0	30.5633	67.5288	6.4851e-16	1.17172e-15	yes
PC-5p-27381_220	TRINITY_DN24065_c0_g1	NAD(P)-binding rossmann-fold protein [Medicago truncatula]	GC1	GO:0009507(chloroplast);GO:0009536(plastid);GO:0009706(chloroplast inner membrane);GO:0009941(chloroplast envelope);GO:0010020(chloroplast fission);GO:0016491(oxidoreductase activity);GO:0042803(protein homodimerization activity);GO:0050662(coenzyme binding);GO:0055114(oxidation-reduction process)	NA	284	11	NA	NA	4	0	0	33.7644	2.1684e-15	3.13149e-15	yes
PC-5p-27381_220	TRINITY_DN24529_c0_g1	surfeit locus protein 6 isoform X1 [Medicago truncatula]	-	GO:0005737(cytoplasm)	NA	725	11	3	2	3	121.017	275.07	168.822	4.5395e-15	6.54078e-15	yes
PC-5p-27381_220	TRINITY_DN24675_c0_g2	cryptochrome-1 isoform X2 [Medicago truncatula]	CRY1	GO:0004672(protein kinase activity);GO:0005515(protein binding);GO:0005524(ATP binding);GO:0005634(nucleus);GO:0005737(cytoplasm);GO:0006952(defense response);GO:0007623(circadian rhythm);GO:0009414(response to water deprivation);GO:0009416(response to light stimulus);GO:0009583(detection of light stimulus);GO:0009637(response to blue light);GO:0009638(phototropism);GO:0009640(photomorphogenesis)…	ko04712(Circadian rhythm - plant)	2085	7.5	NA	3	2	0	61.1266	303.88	0	0	yes
PC-5p-27381_220	TRINITY_DN24758_c1_g4	-	-	NA	NA	188	7	3	4	NA	80.6777	30.5633	0	3.6961e-20	8.81092e-20	yes
PC-5p-27381_220	TRINITY_DN25280_c0_g2	uncharacterized protein LOC100797445 isoform X1 [Glycine max]	-	GO:0003729(mRNA binding);GO:0009507(chloroplast);GO:0009737(response to abscisic acid);GO:0051607(defense response to virus)	NA	450	6	NA	4	NA	0	30.5633	0	5.326e-14	6.30988e-14	yes
PC-5p-27381_220	TRINITY_DN25387_c0_g6	uncharacterized protein At2g39795, mitochondrial [Medicago truncatula]	At2g39795	GO:0003674(molecular_function);GO:0003729(mRNA binding);GO:0005739(mitochondrion);GO:0005759(mitochondrial matrix);GO:0008150(biological_process);GO:0008494(translation activator activity)	NA	358	6.5	NA	2	NA	0	91.6898	0	1.508e-40	8.68797e-40	yes
PC-5p-27381_220	TRINITY_DN25445_c1_g1	probable polyol transporter 4 [Medicago truncatula]	PLT4	GO:0005351(carbohydrate:proton symporter activity);GO:0005355(glucose transmembrane transporter activity);GO:0005887(integral component of plasma membrane);GO:0046323(glucose import)	NA	1788	5.5	NA	4	NA	0	30.5633	0	5.326e-14	6.30988e-14	yes
PC-5p-27381_220	TRINITY_DN25508_c0_g1	DNA-directed RNA polymerase [Medicago truncatula]	NRPC2	GO:0001056(RNA polymerase III activity);GO:0005666(DNA-directed RNA polymerase III complex)	ko00230(Purine metabolism);ko00240(Pyrimidine metabolism);ko03020(RNA polymerase)	2830	7	NA	NA	4	0	0	33.7644	2.1684e-15	3.13149e-15	yes
PC-5p-27381_220	TRINITY_DN25531_c0_g3	uncharacterized protein LOC25482125 isoform X2 [Medicago truncatula]	-	GO:0003729(mRNA binding);GO:0009507(chloroplast);GO:0009737(response to abscisic acid);GO:0051607(defense response to virus)	NA	441	7	NA	NA	4	0	0	33.7644	2.1684e-15	3.13149e-15	yes
PC-5p-27381_220	TRINITY_DN25615_c0_g1	lecithin:cholesterol acyltransferase family protein [Medicago truncatula]	LCAT3	GO:0004607(phosphatidylcholine-sterol O-acyltransferase activity);GO:0005576(extracellular region);GO:0005783(endoplasmic reticulum);GO:0006629(lipid metabolic process);GO:0008374(O-acyltransferase activity);GO:0008970(phosphatidylcholine 1-acylhydrolase activity);GO:0016042(lipid catabolic process);GO:0031090(organelle membrane);GO:0052739(phosphatidylserine 1-acylhydrolase activity);GO:0052740(…	NA	1681	7.5	4	NA	NA	40.3388	0	0	3.0257e-18	5.71521e-18	yes
PC-5p-27381_220	TRINITY_DN26120_c1_g1	nuclear-pore anchor [Medicago truncatula]	NUA	GO:0005643(nuclear pore);GO:0006913(nucleocytoplasmic transport);GO:0007094(mitotic spindle assembly checkpoint)	ko03013(RNA transport)	490	5	2	4	NA	80.6777	30.5633	0	3.6961e-20	8.81092e-20	yes
PC-5p-27381_220	TRINITY_DN26225_c2_g2	putative 43kDa postsynaptic protein [Medicago truncatula]	TSS	GO:0005634(nucleus);GO:0005737(cytoplasm);GO:0005829(cytosol)	NA	129	5.5	NA	4	NA	0	30.5633	0	5.326e-14	6.30988e-14	yes
PC-5p-27381_220	TRINITY_DN26432_c2_g1	eukaryotic translation initiation factor 5B isoform X1 [Medicago truncatula]	CTHT_0029840	GO:0003924(GTPase activity);GO:0005622(intracellular);GO:0006412(translation)	ko03013(RNA transport)	1222	4	4	3	2	40.3388	91.6898	135.058	1.0762e-11	1.23257e-11	yes
PC-5p-27381_220	TRINITY_DN6336_c0_g1	uncharacterized protein At5g19025 isoform X1 [Medicago truncatula]	At5g19025	GO:0003723(RNA binding);GO:0003735(structural constituent of ribosome);GO:0006412(translation);GO:0022625(cytosolic large ribosomal subunit);GO:0042254(ribosome biogenesis)	NA	394	8	NA	2	NA	0	61.1266	0	2.8349e-27	7.6679e-27	yes
PC-5p-33566_173	TRINITY_DN15839_c0_g1	protein LAZ1 [Medicago truncatula]	LAZ1	GO:0005215(transporter activity);GO:0006810(transport);GO:0016021(integral component of membrane)	NA	1442	6	2	2	2	242.033	183.38	202.586	0.013947	0.0141672	yes
PC-5p-33566_173	TRINITY_DN17182_c0_g1	LOW QUALITY PROTEIN: tyrosine--tRNA ligase 2, cytoplasmic [Medicago truncatula]	At1g28350	GO:0004832(valine-tRNA ligase activity);GO:0005829(cytosol);GO:0006438(valyl-tRNA aminoacylation)	ko00970(Aminoacyl-tRNA biosynthesis)	1344	9.5	NA	2	NA	0	61.1266	0	2.8349e-27	7.6679e-27	yes
PC-5p-33566_173	TRINITY_DN24512_c1_g1	putative fructose-bisphosphate aldolase [Medicago truncatula]	-	GO:0004332(fructose-bisphosphate aldolase activity);GO:0006094(gluconeogenesis);GO:0006096(glycolytic process);GO:0006098(pentose-phosphate shunt);GO:0009507(chloroplast);GO:0009534(chloroplast thylakoid);GO:0009570(chloroplast stroma);GO:0009579(thylakoid);GO:0009941(chloroplast envelope);GO:0010287(plastoglobule);GO:0022626(cytosolic ribosome);GO:0031977(thylakoid lumen);GO:0046686(response to …	ko00010(Glycolysis / Gluconeogenesis);ko00030(Pentose phosphate pathway);ko00051(Fructose and mannose metabolism);ko00710(Carbon fixation in photosynthetic organisms)	273	8	NA	4	NA	0	30.5633	0	5.326e-14	6.30988e-14	yes
PC-5p-33566_173	TRINITY_DN8837_c0_g1	-	-	NA	NA	63	10	4	4	NA	40.3388	30.5633	0	7.2896e-09	7.93241e-09	yes
PC-5p-35690_161	TRINITY_DN14068_c1_g1	transcription factor MYB44 [Medicago truncatula]	MYB44	GO:0000981(RNA polymerase II transcription factor activity, sequence-specific DNA binding);GO:0001135(transcription factor activity, RNA polymerase II transcription factor recruiting);GO:0003677(DNA binding);GO:0003700(DNA binding transcription factor activity);GO:0005515(protein binding);GO:0005634(nucleus);GO:0006351(transcription, DNA-templated);GO:0006355(regulation of transcription, DNA-temp…	NA	966	12	4	2	3	40.3388	366.759	101.293	6.1511e-78	1.50994e-76	yes
PC-5p-35690_161	TRINITY_DN14147_c0_g2	hypothetical protein MA16_Dca009435 [Dendrobium catenatum]	-	NA	NA	268	10	2	2	2	10609.1	6051.53	3241.38	0	0	yes
PC-5p-35690_161	TRINITY_DN16396_c0_g5	hypothetical protein TSUD_281080 [Trifolium subterraneum]	-	NA	NA	1020	12	NA	4	NA	0	30.5633	0	5.326e-14	6.30988e-14	yes
PC-5p-35690_161	TRINITY_DN17981_c0_g1	SH3 domain-containing protein 2 [Medicago truncatula]	SH3P2	GO:0000421(autophagosome membrane);GO:0005515(protein binding);GO:0005768(endosome);GO:0005770(late endosome);GO:0005829(cytosol);GO:0005886(plasma membrane);GO:0009504(cell plate);GO:0009920(cell plate formation involved in plant-type cell wall biogenesis);GO:0030136(clathrin-coated vesicle);GO:0030276(clathrin binding)	ko04144(Endocytosis)	195	9	NA	4	NA	0	30.5633	0	5.326e-14	6.30988e-14	yes
PC-5p-35690_161	TRINITY_DN18616_c0_g1	receptor-like protein kinase HSL1 [Medicago truncatula]	HSL1	GO:0004672(protein kinase activity);GO:0004674(protein serine/threonine kinase activity);GO:0005524(ATP binding);GO:0005886(plasma membrane);GO:0006468(protein phosphorylation);GO:0007169(transmembrane receptor protein tyrosine kinase signaling pathway);GO:0016021(integral component of membrane);GO:0016301(kinase activity);GO:0016310(phosphorylation)	NA	1824	9.5	NA	NA	2	0	0	67.5288	4.6985e-30	1.53517e-29	yes
PC-5p-35690_161	TRINITY_DN18944_c0_g2	ubiquitin domain-containing protein DSK2a isoform X1 [Medicago truncatula]	DSK2A	GO:0005515(protein binding);GO:0005634(nucleus);GO:0005829(cytosol);GO:0031593(polyubiquitin modification-dependent protein binding)	ko04141(Protein processing in endoplasmic reticulum)	1589	12	NA	NA	4	0	0	33.7644	2.1684e-15	3.13149e-15	yes
PC-5p-35690_161	TRINITY_DN18973_c0_g1	uncharacterized protein LOC11426577 [Medicago truncatula]	-	GO:0005509(calcium ion binding);GO:0005794(Golgi apparatus);GO:0006004(fucose metabolic process);GO:0016021(integral component of membrane);GO:0016757(transferase activity, transferring glycosyl groups);GO:0042175(nuclear outer membrane-endoplasmic reticulum membrane network)	NA	953	10	NA	NA	4	0	0	33.7644	2.1684e-15	3.13149e-15	yes
PC-5p-35690_161	TRINITY_DN20136_c0_g3	ABC transporter I family member 6, chloroplastic [Medicago truncatula]	ABCI6	GO:0005215(transporter activity);GO:0005515(protein binding);GO:0005524(ATP binding);GO:0009507(chloroplast);GO:0009570(chloroplast stroma);GO:0009793(embryo development ending in seed dormancy);GO:0010027(thylakoid membrane organization);GO:0016226(iron-sulfur cluster assembly);GO:0042626(ATPase activity, coupled to transmembrane movement of substances)	NA	710	8.5	4	NA	NA	40.3388	0	0	3.0257e-18	5.71521e-18	yes
PC-5p-35690_161	TRINITY_DN20156_c0_g2	phospho-2-dehydro-3-deoxyheptonate aldolase 1, chloroplastic [Medicago truncatula]	DHAPS-1	GO:0003849(3-deoxy-7-phosphoheptulonate synthase activity);GO:0009073(aromatic amino acid family biosynthetic process);GO:0009423(chorismate biosynthetic process);GO:0009507(chloroplast);GO:0009536(plastid);GO:0016020(membrane)	ko00400(Phenylalanine, tyrosine and tryptophan biosynthesis)	591	7	NA	4	4	0	30.5633	33.7644	9.1976e-08	9.66516e-08	yes
PC-5p-35690_161	TRINITY_DN20998_c0_g4	60S ribosomal protein L7a-1 [Medicago truncatula]	RPL7A-1	GO:0000470(maturation of LSU-rRNA);GO:0003723(RNA binding);GO:0006412(translation);GO:0022625(cytosolic large ribosomal subunit)	ko03010(Ribosome)	146	10.5	4	NA	NA	40.3388	0	0	3.0257e-18	5.71521e-18	yes
PC-5p-35690_161	TRINITY_DN21266_c0_g5	-	-	NA	NA	89	5	NA	NA	4	0	0	33.7644	2.1684e-15	3.13149e-15	yes
PC-5p-35690_161	TRINITY_DN21391_c0_g1	vicilin-like seed storage protein At2g18540 [Cicer arietinum]	-	GO:0003674(molecular_function);GO:0005634(nucleus);GO:0008150(biological_process)	NA	336	12	NA	3	3	0	61.1266	67.5288	8.4537e-15	1.20888e-14	yes
PC-5p-35690_161	TRINITY_DN22556_c0_g1	uncharacterized protein LOC11413546 [Medicago truncatula]	-	GO:0003674(molecular_function);GO:0008150(biological_process);GO:0009507(chloroplast)	NA	726	9	2	NA	NA	201.694	0	0	0	0	yes
PC-5p-35690_161	TRINITY_DN22699_c1_g1	DNAJ protein JJJ1 homolog [Medicago truncatula]	JJJ1	GO:0003676(nucleic acid binding);GO:0005515(protein binding);GO:0005634(nucleus);GO:0006457(protein folding);GO:0008270(zinc ion binding)	NA	1119	10.5	4	NA	4	40.3388	0	33.7644	5.8097e-09	6.43576e-09	yes
PC-5p-35690_161	TRINITY_DN22916_c0_g2	cationic peroxidase [Medicago truncatula]	PER42	GO:0004601(peroxidase activity);GO:0009505(plant-type cell wall);GO:0009664(plant-type cell wall organization)	ko00940(Phenylpropanoid biosynthesis)	2025	9	NA	NA	3	0	0	135.058	2.2009e-59	2.88805e-58	yes
PC-5p-35690_161	TRINITY_DN23118_c0_g1	protein CONSERVED IN THE GREEN LINEAGE AND DIATOMS 27, chloroplastic [Medicago truncatula]	ycf36	GO:0003674(molecular_function);GO:0009507(chloroplast);GO:0016021(integral component of membrane);GO:1990641(response to iron ion starvation)	NA	2873	9	NA	NA	3	0	0	67.5288	4.6985e-30	1.53517e-29	yes
PC-5p-35690_161	TRINITY_DN23772_c0_g2	putative UDP-glucuronate decarboxylase [Medicago truncatula]	UXS1	GO:0000139(Golgi membrane);GO:0003824(catalytic activity);GO:0005768(endosome);GO:0005794(Golgi apparatus);GO:0005802(trans-Golgi network);GO:0005829(cytosol);GO:0005886(plasma membrane);GO:0008460(dTDP-glucose 4,6-dehydratase activity);GO:0009225(nucleotide-sugar metabolic process);GO:0016020(membrane);GO:0016021(integral component of membrane);GO:0019305(dTDP-rhamnose biosynthetic process);GO:0…	ko00520(Amino sugar and nucleotide sugar metabolism)	406	8	NA	NA	4	0	0	33.7644	2.1684e-15	3.13149e-15	yes
PC-5p-35690_161	TRINITY_DN24269_c0_g4	uncharacterized protein LOC11436750 isoform X1 [Medicago truncatula]	-	NA	NA	488	9	NA	2	NA	0	61.1266	0	2.8349e-27	7.6679e-27	yes
PC-5p-35690_161	TRINITY_DN25707_c0_g1	putative RNA polymerase II-associated protein [Medicago truncatula]	IYO	GO:0005634(nucleus);GO:0006366(transcription by RNA polymerase II)	NA	887	7	NA	NA	4	0	0	33.7644	2.1684e-15	3.13149e-15	yes
PC-5p-35690_161	TRINITY_DN26392_c2_g1	uncharacterized protein LOC11409580 [Medicago truncatula]	EXO70B1	GO:0000145(exocyst);GO:0005515(protein binding);GO:0005737(cytoplasm);GO:0005829(cytosol);GO:0005886(plasma membrane);GO:0006887(exocytosis);GO:0006904(vesicle docking involved in exocytosis);GO:0009414(response to water deprivation);GO:0009789(positive regulation of abscisic acid-activated signaling pathway);GO:0012505(endomembrane system);GO:0042742(defense response to bacterium);GO:0045335(pha…	NA	308	9	NA	2	NA	0	61.1266	0	2.8349e-27	7.6679e-27	yes
PC-5p-39746_142	TRINITY_DN11623_c0_g1	-	-	NA	NA	40	12	4	4	NA	40.3388	30.5633	0	7.2896e-09	7.93241e-09	yes
PC-5p-39746_142	TRINITY_DN11623_c0_g1	-	-	NA	NA	427	6.5	2	4	4	282.372	30.5633	33.7644	3.6314e-79	9.1711e-78	yes
PC-5p-39746_142	TRINITY_DN12347_c0_g1	EVI5-like protein [Medicago truncatula]	EVI5L	GO:0005096(GTPase activator activity);GO:0005622(intracellular);GO:0006886(intracellular protein transport);GO:0012505(endomembrane system);GO:0017137(Rab GTPase binding);GO:0031338(regulation of vesicle fusion);GO:0090630(activation of GTPase activity)	NA	252	11	NA	NA	4	0	0	33.7644	2.1684e-15	3.13149e-15	yes
PC-5p-39746_142	TRINITY_DN13090_c0_g2	psbP domain-containing protein 4, chloroplastic [Medicago truncatula]	PPD4	GO:0005509(calcium ion binding);GO:0009507(chloroplast);GO:0009534(chloroplast thylakoid);GO:0009543(chloroplast thylakoid lumen);GO:0009570(chloroplast stroma);GO:0009579(thylakoid);GO:0009654(photosystem II oxygen evolving complex);GO:0015979(photosynthesis);GO:0019898(extrinsic component of membrane);GO:0031977(thylakoid lumen)	NA	911	7.5	2	3	3	242.033	122.253	101.293	7.2887e-17	1.34726e-16	yes
PC-5p-39746_142	TRINITY_DN13711_c0_g1	transcription factor MAMYB [Medicago truncatula]	dnajc2	GO:0003677(DNA binding);GO:0003700(DNA binding transcription factor activity);GO:0005634(nucleus);GO:0005783(endoplasmic reticulum);GO:0005886(plasma membrane);GO:0048767(root hair elongation)	NA	502	9.5	3	NA	NA	80.6777	0	0	9.1449e-36	4.07513e-35	yes
PC-5p-39746_142	TRINITY_DN14193_c0_g6	F-box protein PP2-B15 [Medicago truncatula]	PP2B15	GO:0005634(nucleus);GO:0030246(carbohydrate binding)	NA	774	7.5	4	NA	4	40.3388	0	33.7644	5.8097e-09	6.43576e-09	yes
PC-5p-39746_142	TRINITY_DN14204_c0_g3	cysteine-rich TM module stress tolerance protein [Medicago truncatula]	-	NA	NA	82	8.5	2	4	NA	121.017	30.5633	0	9.1063e-35	3.97245e-34	yes
PC-5p-39746_142	TRINITY_DN14692_c0_g3	protein YLS3 [Medicago truncatula]	YLS3	GO:0005886(plasma membrane);GO:0006869(lipid transport);GO:0008289(lipid binding);GO:0016021(integral component of membrane);GO:0031225(anchored component of membrane)	NA	558	9	2	NA	NA	80.6777	0	0	9.1449e-36	4.07513e-35	yes
PC-5p-39746_142	TRINITY_DN14837_c0_g2	glycine-rich cell wall structural protein [Medicago truncatula]	-	NA	NA	329	14	NA	2	NA	0	61.1266	0	2.8349e-27	7.6679e-27	yes
PC-5p-39746_142	TRINITY_DN14843_c0_g1	putative transcription factor CSD family [Medicago truncatula]	GRP-2	GO:0004477(methenyltetrahydrofolate cyclohydrolase activity);GO:0004488(methylenetetrahydrofolate dehydrogenase (NADP+) activity);GO:0005829(cytosol);GO:0006730(one-carbon metabolic process)	NA	389	10	2	3	4	201.694	61.1266	33.7644	2.1589e-36	1.15663e-35	yes
PC-5p-39746_142	TRINITY_DN15046_c0_g7	dnaJ homolog subfamily B member 1 [Medicago truncatula]	Dnajb1	GO:0005737(cytoplasm);GO:0006457(protein folding);GO:0051082(unfolded protein binding)	NA	583	9	NA	NA	4	0	0	33.7644	2.1684e-15	3.13149e-15	yes
PC-5p-39746_142	TRINITY_DN15420_c1_g1	uncharacterized protein LOC11433926 [Medicago truncatula]	tag	GO:0005634(nucleus);GO:0006281(DNA repair);GO:0006284(base-excision repair);GO:0008725(DNA-3-methyladenine glycosylase activity)	ko03410(Base excision repair)	935	13	NA	NA	4	0	0	33.7644	2.1684e-15	3.13149e-15	yes
PC-5p-39746_142	TRINITY_DN15635_c0_g4	unknown [Medicago truncatula]	Os06g0704300	GO:0003676(nucleic acid binding);GO:0005515(protein binding);GO:0005634(nucleus);GO:0005635(nuclear envelope);GO:0005643(nuclear pore);GO:0015031(protein transport);GO:0046872(metal ion binding);GO:0051028(mRNA transport)	ko03013(RNA transport)	48	9.5	4	NA	NA	40.3388	0	0	3.0257e-18	5.71521e-18	yes
PC-5p-39746_142	TRINITY_DN15704_c0_g1	unknown [Medicago truncatula]	-	NA	NA	95	9.5	NA	NA	4	0	0	33.7644	2.1684e-15	3.13149e-15	yes
PC-5p-39746_142	TRINITY_DN15739_c1_g1	Heat shock 70 kDa protein 4L [Cajanus cajan]	HSP70-14	GO:0005515(protein binding);GO:0005524(ATP binding);GO:0005634(nucleus);GO:0005737(cytoplasm);GO:0005829(cytosol);GO:0005886(plasma membrane);GO:0006457(protein folding);GO:0009408(response to heat);GO:0046686(response to cadmium ion)	NA	1978	5.5	2	NA	NA	201.694	0	0	0	0	yes
PC-5p-39746_142	TRINITY_DN16444_c0_g3	UDP-glycosyltransferase 73C2-like protein [Trifolium pratense]	UGT73C2	GO:0009813(flavonoid biosynthetic process);GO:0043231(intracellular membrane-bounded organelle);GO:0052696(flavonoid glucuronidation);GO:0080043(quercetin 3-O-glucosyltransferase activity);GO:0080044(quercetin 7-O-glucosyltransferase activity)	NA	825	8	NA	NA	2	0	0	67.5288	4.6985e-30	1.53517e-29	yes
PC-5p-39746_142	TRINITY_DN16444_c0_g5	crocetin glucosyltransferase, chloroplastic [Medicago truncatula]	UGT75L6	GO:0009813(flavonoid biosynthetic process);GO:0043231(intracellular membrane-bounded organelle);GO:0052696(flavonoid glucuronidation);GO:0080043(quercetin 3-O-glucosyltransferase activity);GO:0080044(quercetin 7-O-glucosyltransferase activity)	NA	190	9	4	4	4	40.3388	30.5633	33.7644	0.49068	0.491154	yes
PC-5p-39746_142	TRINITY_DN16903_c0_g3	DNA-directed RNA polymerases II, IV and V subunit 6A [Medicago truncatula]	NRPB6A	GO:0001054(RNA polymerase I activity);GO:0001055(RNA polymerase II activity);GO:0001056(RNA polymerase III activity);GO:0005665(DNA-directed RNA polymerase II, core complex);GO:0005666(DNA-directed RNA polymerase III complex);GO:0005736(DNA-directed RNA polymerase I complex)	ko00230(Purine metabolism);ko00240(Pyrimidine metabolism);ko03020(RNA polymerase)	348	11	4	4	4	40.3388	30.5633	33.7644	0.49068	0.491154	yes
PC-5p-39746_142	TRINITY_DN16952_c0_g1	DCN1-like protein 4 [Medicago truncatula]	DCUN1D4	GO:0000151(ubiquitin ligase complex);GO:0031624(ubiquitin conjugating enzyme binding);GO:0032182(ubiquitin-like protein binding);GO:0045116(protein neddylation);GO:0051443(positive regulation of ubiquitin-protein transferase activity);GO:0097602(cullin family protein binding)	NA	356	8.5	NA	4	NA	0	30.5633	0	5.326e-14	6.30988e-14	yes
PC-5p-39746_142	TRINITY_DN17011_c1_g2	RNA-directed DNA polymerase ; HMG-I and HMG-Y, DNA-binding, putative [Medicago truncatula]	-	NA	NA	83	7.5	NA	NA	4	0	0	33.7644	2.1684e-15	3.13149e-15	yes
PC-5p-39746_142	TRINITY_DN17015_c0_g1	vacuolar fusion protein CCZ1 homolog B isoform X2 [Medicago truncatula]	CCZ1B	GO:0016192(vesicle-mediated transport);GO:0043231(intracellular membrane-bounded organelle)	NA	1436	10	NA	4	NA	0	30.5633	0	5.326e-14	6.30988e-14	yes
PC-5p-39746_142	TRINITY_DN17171_c0_g1	putative tRNA 4-demethylwyosine synthase (AdoMet-dependent) [Medicago truncatula]	TYW1	GO:0005739(mitochondrion);GO:0008033(tRNA processing);GO:0010181(FMN binding);GO:0016491(oxidoreductase activity);GO:0046872(metal ion binding);GO:0051539(4 iron, 4 sulfur cluster binding);GO:0055114(oxidation-reduction process);GO:0102521(tRNA-4-demethylwyosine synthase activity)	NA	675	9.5	4	4	NA	40.3388	30.5633	0	7.2896e-09	7.93241e-09	yes
PC-5p-39746_142	TRINITY_DN17266_c0_g1	protein MIZU-KUSSEI 1 [Medicago truncatula]	MIZ1	GO:0003674(molecular_function);GO:0005634(nucleus);GO:0008150(biological_process)	NA	593	12.5	4	2	NA	40.3388	61.1266	0	3.9437e-13	4.56816e-13	yes
PC-5p-39746_142	TRINITY_DN17491_c0_g1	E3 ubiquitin-protein ligase RNF13 [Medicago truncatula]	RHC2A	GO:0000209(protein polyubiquitination);GO:0043161(proteasome-mediated ubiquitin-dependent protein catabolic process);GO:0061630(ubiquitin protein ligase activity)	NA	903	8.5	NA	NA	2	0	0	67.5288	4.6985e-30	1.53517e-29	yes
PC-5p-39746_142	TRINITY_DN17503_c0_g1	protein NRT1/ PTR FAMILY 2.9 [Medicago truncatula]	NPF2.11	GO:0005215(transporter activity);GO:0005886(plasma membrane);GO:0006857(oligopeptide transport);GO:0009506(plasmodesma);GO:0016020(membrane);GO:0016021(integral component of membrane);GO:0055085(transmembrane transport);GO:0080167(response to karrikin);GO:0090448(glucosinolate:proton symporter activity);GO:0090449(phloem glucosinolate loading);GO:1901349(glucosinolate transport)	NA	1411	3	NA	NA	2	0	0	67.5288	4.6985e-30	1.53517e-29	yes
PC-5p-39746_142	TRINITY_DN18200_c0_g1	BTB/POZ domain-containing protein At1g63850 [Medicago truncatula]	At1g63850	GO:0005634(nucleus);GO:0016567(protein ubiquitination)	NA	1601	8.5	NA	4	NA	0	30.5633	0	5.326e-14	6.30988e-14	yes
PC-5p-39746_142	TRINITY_DN18206_c0_g1	3-oxoacyl-[acyl-carrier-protein] synthase, mitochondrial [Medicago truncatula]	KAS	GO:0004312(fatty acid synthase activity);GO:0004315(3-oxoacyl-[acyl-carrier-protein] synthase activity);GO:0005739(mitochondrion);GO:0006633(fatty acid biosynthetic process);GO:0010027(thylakoid membrane organization)	ko00061(Fatty acid biosynthesis);ko00780(Biotin metabolism)	904	12.5	NA	NA	4	0	0	33.7644	2.1684e-15	3.13149e-15	yes
PC-5p-39746_142	TRINITY_DN18389_c0_g1	pyruvate kinase isozyme A, chloroplastic [Medicago truncatula]	-	GO:0000287(magnesium ion binding);GO:0004743(pyruvate kinase activity);GO:0005524(ATP binding);GO:0005829(cytosol);GO:0006096(glycolytic process);GO:0006629(lipid metabolic process);GO:0009507(chloroplast);GO:0009570(chloroplast stroma);GO:0010431(seed maturation);GO:0016301(kinase activity);GO:0030955(potassium ion binding);GO:0046686(response to cadmium ion)	ko00010(Glycolysis / Gluconeogenesis);ko00620(Pyruvate metabolism);ko00230(Purine metabolism)	1525	8	2	NA	2	80.6777	0	67.5288	3.3721e-17	6.28407e-17	yes
PC-5p-39746_142	TRINITY_DN18510_c0_g2	chloroplast processing peptidase [Medicago truncatula]	PLSP1	GO:0004252(serine-type endopeptidase activity);GO:0006465(signal peptide processing);GO:0006627(protein processing involved in protein targeting to mitochondrion);GO:0009535(chloroplast thylakoid membrane);GO:0010027(thylakoid membrane organization);GO:0033108(mitochondrial respiratory chain complex assembly);GO:0042720(mitochondrial inner membrane peptidase complex)	ko03060(Protein export)	321	18.5	NA	NA	3	0	0	67.5288	4.6985e-30	1.53517e-29	yes
PC-5p-39746_142	TRINITY_DN18530_c1_g3	serine/threonine-protein kinase STN8, chloroplastic isoform X1 [Medicago truncatula]	STN8	GO:0004672(protein kinase activity)	NA	106	8	NA	NA	4	0	0	33.7644	2.1684e-15	3.13149e-15	yes
PC-5p-39746_142	TRINITY_DN18593_c0_g3	peroxisome biogenesis protein 3-2 [Medicago truncatula]	PEX3-2	GO:0005739(mitochondrion);GO:0005777(peroxisome);GO:0005779(integral component of peroxisomal membrane);GO:0007031(peroxisome organization);GO:0015031(protein transport)	ko04146(Peroxisome)	600	6	2	4	NA	80.6777	30.5633	0	3.6961e-20	8.81092e-20	yes
PC-5p-39746_142	TRINITY_DN18651_c0_g1	clp protease proteolytic subunit [Cicer arietinum]	clpP	GO:0009536(plastid)	NA	2852	8	4	3	4	40.3388	61.1266	33.7644	0.010824	0.0109988	yes
PC-5p-39746_142	TRINITY_DN18819_c0_g2	ABC transporter I family member 20 [Medicago truncatula]	ABCI20	GO:0005215(transporter activity);GO:0005524(ATP binding);GO:0005737(cytoplasm);GO:0005829(cytosol);GO:0005886(plasma membrane);GO:0010114(response to red light);GO:0010218(response to far red light);GO:0016021(integral component of membrane);GO:0016887(ATPase activity);GO:0071329(cellular response to sucrose stimulus)	ko03018(RNA degradation)	495	7	NA	4	NA	0	30.5633	0	5.326e-14	6.30988e-14	yes
PC-5p-39746_142	TRINITY_DN18857_c0_g1	zinc finger CCCH domain protein, putative [Medicago truncatula]	At1g10320	GO:0000398(mRNA splicing, via spliceosome);GO:0003677(DNA binding);GO:0003723(RNA binding);GO:0005634(nucleus);GO:0046872(metal ion binding);GO:0089701(U2AF)	NA	62	12.5	NA	NA	4	0	0	33.7644	2.1684e-15	3.13149e-15	yes
PC-5p-39746_142	TRINITY_DN19011_c0_g1	uncharacterized protein LOC25494202 [Medicago truncatula]	-	GO:0003735(structural constituent of ribosome);GO:0006412(translation);GO:0022625(cytosolic large ribosomal subunit)	NA	293	7.5	NA	4	NA	0	30.5633	0	5.326e-14	6.30988e-14	yes
PC-5p-39746_142	TRINITY_DN19263_c0_g1	uncharacterized protein LOC25487408 [Medicago truncatula]	-	GO:0008150(biological_process);GO:0009507(chloroplast);GO:0016021(integral component of membrane)	NA	476	12	NA	4	2	0	30.5633	101.293	2.1117e-27	6.57705e-27	yes
PC-5p-39746_142	TRINITY_DN19348_c1_g1	PTI1-like tyrosine-protein kinase 3 [Medicago truncatula]	PTI12	GO:0004715(non-membrane spanning protein tyrosine kinase activity);GO:0005524(ATP binding);GO:0005886(plasma membrane);GO:0006952(defense response);GO:0009506(plasmodesma);GO:0016301(kinase activity);GO:0019901(protein kinase binding)	ko04626(Plant-pathogen interaction)	591	9	4	NA	NA	40.3388	0	0	3.0257e-18	5.71521e-18	yes
PC-5p-39746_142	TRINITY_DN19603_c1_g1	putative transcription initiation factor IIE subunit alpha, TFIIEalpha/SarR/Rpc3 HTH [Medicago truncatula]	TFA1	GO:0005634(nucleus);GO:0005673(transcription factor TFIIE complex);GO:0006357(regulation of transcription by RNA polymerase II);GO:0006367(transcription initiation from RNA polymerase II promoter);GO:0043565(sequence-specific DNA binding)	ko03022(Basal transcription factors)	1416	7	4	2	2	40.3388	152.816	135.058	3.0478e-15	4.39646e-15	yes
PC-5p-39746_142	TRINITY_DN19674_c0_g4	licodione synthase [Medicago truncatula]	CYP93B1	GO:0016020(membrane);GO:0016709(oxidoreductase activity, acting on paired donors, with incorporation or reduction of molecular oxygen, NAD(P)H as one donor, and incorporation of one atom of oxygen);GO:0044550(secondary metabolite biosynthetic process)	NA	834	7.5	NA	4	4	0	30.5633	33.7644	9.1976e-08	9.66516e-08	yes
PC-5p-39746_142	TRINITY_DN19820_c0_g3	-	-	NA	NA	60	9	NA	NA	0	0	0	101.293	1.0173e-44	7.03524e-44	yes
PC-5p-39746_142	TRINITY_DN19875_c0_g3	E3 ubiquitin-protein ligase HERC2-like protein [Medicago truncatula]	HERC2	GO:0003682(chromatin binding);GO:0005886(plasma membrane);GO:0008150(biological_process);GO:0008536(Ran GTPase binding)	NA	544	13.5	NA	4	NA	0	30.5633	0	5.326e-14	6.30988e-14	yes
PC-5p-39746_142	TRINITY_DN19883_c0_g1	splicing factor U2af small subunit B isoform X2 [Medicago truncatula]	U2AF35B	GO:0000398(mRNA splicing, via spliceosome);GO:0003677(DNA binding);GO:0003723(RNA binding);GO:0005515(protein binding);GO:0005634(nucleus);GO:0005681(spliceosomal complex);GO:0016607(nuclear speck);GO:0030628(pre-mRNA 3'-splice site binding);GO:0046872(metal ion binding);GO:0048573(photoperiodism, flowering);GO:0089701(U2AF)	ko03040(Spliceosome)	829	15	3	3	2	80.6777	61.1266	303.88	6.6273e-54	8.03887e-53	yes
PC-5p-39746_142	TRINITY_DN19960_c1_g1	-	-	NA	NA	322	10.5	3	4	0	80.6777	30.5633	303.88	3.4747e-67	6.10754e-66	yes
PC-5p-39746_142	TRINITY_DN19960_c1_g5	-	-	NA	NA	204	20	4	NA	4	40.3388	0	33.7644	5.8097e-09	6.43576e-09	yes
PC-5p-39746_142	TRINITY_DN20061_c0_g1	Bromodomain [Medicago truncatula]	GTE6	GO:0002039(p53 binding);GO:0003682(chromatin binding);GO:0005634(nucleus);GO:0032968(positive regulation of transcription elongation from RNA polymerase II promoter);GO:0043123(positive regulation of I-kappaB kinase/NF-kappaB signaling);GO:0045944(positive regulation of transcription by RNA polymerase II);GO:0050727(regulation of inflammatory response);GO:0070577(lysine-acetylated histone binding…	NA	1618	7	NA	NA	4	0	0	33.7644	2.1684e-15	3.13149e-15	yes
PC-5p-39746_142	TRINITY_DN20117_c0_g1	transcriptional corepressor LEUNIG_HOMOLOG isoform X2 [Medicago truncatula]	LUH	GO:0003674(molecular_function);GO:0005829(cytosol);GO:0008150(biological_process);GO:0032153(cell division site);GO:0051285(cell cortex of cell tip)	NA	1659	5.5	4	4	NA	40.3388	30.5633	0	7.2896e-09	7.93241e-09	yes
PC-5p-39746_142	TRINITY_DN20120_c0_g2	probable transcription factor At4g00390 [Medicago truncatula]	GPL1	GO:0005515(protein binding);GO:0005634(nucleus);GO:0005794(Golgi apparatus);GO:0006351(transcription, DNA-templated);GO:0006355(regulation of transcription, DNA-templated)	NA	999	8	NA	2	2	0	91.6898	135.058	4.7583e-28	1.52068e-27	yes
PC-5p-39746_142	TRINITY_DN20127_c0_g1	hypothetical protein Ahy_A06g027726 isoform B [Arachis hypogaea]	PAT12	GO:0005576(extracellular region);GO:0005886(plasma membrane);GO:0016021(integral component of membrane);GO:0019706(protein-cysteine S-palmitoyltransferase activity)	NA	1030	8.5	NA	NA	2	0	0	67.5288	4.6985e-30	1.53517e-29	yes
PC-5p-39746_142	TRINITY_DN20352_c0_g1	vestitone reductase isoform X2 [Medicago truncatula]	-	GO:0003824(catalytic activity);GO:0005634(nucleus);GO:0005737(cytoplasm);GO:0007275(multicellular organism development);GO:0009646(response to absence of light);GO:0009813(flavonoid biosynthetic process);GO:0010422(regulation of brassinosteroid biosynthetic process);GO:0016131(brassinosteroid metabolic process);GO:0016132(brassinosteroid biosynthetic process);GO:0016491(oxidoreductase activity);G…	ko00943(Isoflavonoid biosynthesis)	175	5.5	4	NA	4	40.3388	0	33.7644	5.8097e-09	6.43576e-09	yes
PC-5p-39746_142	TRINITY_DN20376_c0_g2	IMP dehydrogenase/GMP reductase, putative [Medicago truncatula]	AUG5	GO:0005876(spindle microtubule);GO:0009524(phragmoplast);GO:0051011(microtubule minus-end binding);GO:0051225(spindle assembly);GO:0051301(cell division);GO:0070652(HAUS complex)	NA	583	9	NA	NA	4	0	0	33.7644	2.1684e-15	3.13149e-15	yes
PC-5p-39746_142	TRINITY_DN20380_c0_g1	BAG family molecular chaperone regulator 7 [Medicago truncatula]	-	NA	NA	632	8.5	NA	3	4	0	61.1266	33.7644	1.3397e-13	1.5644e-13	yes
PC-5p-39746_142	TRINITY_DN20423_c0_g2	scarecrow-like protein 15 [Medicago truncatula]	SCL15	GO:0003700(DNA binding transcription factor activity);GO:0005634(nucleus);GO:0006355(regulation of transcription, DNA-templated);GO:0030154(cell differentiation);GO:0043565(sequence-specific DNA binding);GO:0048831(regulation of shoot system development)	ko04075(Plant hormone signal transduction)	1733	9.5	2	4	4	161.355	30.5633	33.7644	7.3184e-33	3.01798e-32	yes
PC-5p-39746_142	TRINITY_DN20466_c1_g3	CRM-domain containing factor CFM3, chloroplastic/mitochondrial [Medicago truncatula]	CFM3	GO:0009507(chloroplast);GO:0009737(response to abscisic acid);GO:0009793(embryo development ending in seed dormancy)	NA	624	7.5	NA	4	NA	0	30.5633	0	5.326e-14	6.30988e-14	yes
PC-5p-39746_142	TRINITY_DN20474_c0_g5	exocyst complex component EXO70A1 [Medicago truncatula]	EXO70A1	GO:0000145(exocyst);GO:0006904(vesicle docking involved in exocytosis)	NA	1715	8	2	3	4	121.017	61.1266	33.7644	9.596e-13	1.10671e-12	yes
PC-5p-39746_142	TRINITY_DN20903_c1_g7	-	-	NA	NA	309	6	NA	NA	4	0	0	33.7644	2.1684e-15	3.13149e-15	yes
PC-5p-39746_142	TRINITY_DN20947_c0_g3	uncharacterized protein LOC25496745 [Medicago truncatula]	-	NA	NA	66	7.5	4	2	NA	40.3388	91.6898	0	1.4416e-21	3.51602e-21	yes
PC-5p-39746_142	TRINITY_DN21042_c0_g3	protein ABCI7, chloroplastic [Medicago truncatula]	ABCI7	GO:0005215(transporter activity);GO:0005515(protein binding);GO:0006810(transport);GO:0009507(chloroplast);GO:0009536(plastid);GO:0009570(chloroplast stroma);GO:0009793(embryo development ending in seed dormancy);GO:0010027(thylakoid membrane organization);GO:0016226(iron-sulfur cluster assembly)	NA	753	16.5	2	2	2	201.694	213.943	101.293	2.3451e-10	2.6668e-10	yes
PC-5p-39746_142	TRINITY_DN21048_c0_g1	methyltransferase-like protein 1 [Medicago truncatula]	EMB1691	GO:0003676(nucleic acid binding);GO:0005515(protein binding);GO:0005634(nucleus);GO:0005737(cytoplasm);GO:0005829(cytosol);GO:0008168(methyltransferase activity);GO:0008757(S-adenosylmethionine-dependent methyltransferase activity);GO:0009793(embryo development ending in seed dormancy);GO:0032259(methylation);GO:0080009(mRNA methylation)	NA	453	7.5	NA	NA	2	0	0	135.058	2.2009e-59	2.88805e-58	yes
PC-5p-39746_142	TRINITY_DN21109_c0_g1	TATA-binding protein-associated factor 2N [Medicago truncatula]	-	NA	NA	786	6.5	3	3	4	80.6777	61.1266	33.7644	7.567e-05	7.81823e-05	yes
PC-5p-39746_142	TRINITY_DN21125_c0_g1	polygalacturonase 1 beta-like protein 3 [Medicago truncatula]	PGL3	GO:0004650(polygalacturonase activity);GO:0005576(extracellular region);GO:0005618(cell wall);GO:0008150(biological_process);GO:0048046(apoplast)	ko04144(Endocytosis)	1594	2.5	2	NA	2	121.017	0	67.5288	3.8454e-26	1.0174e-25	yes
PC-5p-39746_142	TRINITY_DN21277_c0_g1	E3 ubiquitin-protein ligase BOI [Medicago truncatula]	BOI	GO:0004842(ubiquitin-protein transferase activity);GO:0005634(nucleus);GO:0005737(cytoplasm);GO:0009739(response to gibberellin);GO:0042742(defense response to bacterium);GO:0043069(negative regulation of programmed cell death);GO:0043161(proteasome-mediated ubiquitin-dependent protein catabolic process);GO:0046872(metal ion binding);GO:0050832(defense response to fungus);GO:2000117(negative regu…	NA	994	11.5	2	2	NA	80.6777	61.1266	0	5.3091e-17	9.81985e-17	yes
PC-5p-39746_142	TRINITY_DN21358_c1_g2	putative ANTH domain-containing protein [Medicago truncatula]	At4g32285	GO:0005634(nucleus);GO:0005829(cytosol);GO:0005886(plasma membrane)	NA	908	9	NA	4	4	0	30.5633	33.7644	9.1976e-08	9.66516e-08	yes
PC-5p-39746_142	TRINITY_DN21544_c0_g1	trihelix transcription factor GT-2 [Medicago truncatula]	GT-2	GO:0003700(DNA binding transcription factor activity);GO:0005634(nucleus);GO:0006355(regulation of transcription, DNA-templated);GO:0010192(mucilage biosynthetic process);GO:0019760(glucosinolate metabolic process);GO:0043565(sequence-specific DNA binding);GO:0044212(transcription regulatory region DNA binding)	NA	952	8.5	2	2	2	363.05	366.759	303.88	0.026946	0.0273299	yes
PC-5p-39746_142	TRINITY_DN21889_c0_g1	calmodulin-binding transcription activator 1 isoform X1 [Medicago truncatula]	CMTA3	GO:0005634(nucleus);GO:0043565(sequence-specific DNA binding);GO:0045944(positive regulation of transcription by RNA polymerase II)	NA	2945	20.5	NA	2	NA	0	61.1266	0	2.8349e-27	7.6679e-27	yes
PC-5p-39746_142	TRINITY_DN21921_c0_g2	uncharacterized protein LOC11428719 isoform X1 [Medicago truncatula]	-	GO:0003674(molecular_function);GO:0005634(nucleus);GO:0008150(biological_process)	NA	827	8	4	NA	4	40.3388	0	33.7644	5.8097e-09	6.43576e-09	yes
PC-5p-39746_142	TRINITY_DN21940_c0_g3	uncharacterized protein LOC25490736 [Medicago truncatula]	-	GO:0003674(molecular_function);GO:0009507(chloroplast);GO:0009658(chloroplast organization);GO:0009793(embryo development ending in seed dormancy);GO:0010027(thylakoid membrane organization);GO:0016021(integral component of membrane);GO:0090056(regulation of chlorophyll metabolic process)	NA	586	8	NA	2	NA	0	122.253	0	8.0164e-54	8.78795e-53	yes
PC-5p-39746_142	TRINITY_DN22013_c0_g1	putative histone deacetylase [Medicago truncatula]	HDA6	GO:0004407(histone deacetylase activity);GO:0005515(protein binding);GO:0005634(nucleus);GO:0005730(nucleolus);GO:0006351(transcription, DNA-templated);GO:0006355(regulation of transcription, DNA-templated);GO:0009651(response to salt stress);GO:0009737(response to abscisic acid);GO:0009793(embryo development ending in seed dormancy);GO:0009941(chloroplast envelope);GO:0010228(vegetative to repro…	NA	1133	12	2	2	2	201.694	152.816	135.058	0.00067669	0.000693307	yes
PC-5p-39746_142	TRINITY_DN22091_c0_g1	riboflavin biosynthesis protein PYRR, chloroplastic isoform X1 [Medicago truncatula]	PYRR	GO:0009451(RNA modification);GO:0019239(deaminase activity)	ko00740(Riboflavin metabolism)	2540	9	NA	4	2	0	30.5633	67.5288	6.4851e-16	1.17172e-15	yes
PC-5p-39746_142	TRINITY_DN22121_c0_g4	serine/threonine-protein phosphatase 6 regulatory subunit 2 isoform X1 [Medicago truncatula]	-	GO:0008150(biological_process)	NA	435	9.5	NA	2	2	0	122.253	101.293	1.2212e-25	3.21458e-25	yes
PC-5p-39746_142	TRINITY_DN22122_c0_g1	uncharacterized protein LOC101490539 [Cicer arietinum]	-	GO:0008150(biological_process);GO:0009535(chloroplast thylakoid membrane);GO:0016021(integral component of membrane)	ko03008(Ribosome biogenesis in eukaryotes)	586	8.5	4	NA	4	40.3388	0	33.7644	5.8097e-09	6.43576e-09	yes
PC-5p-39746_142	TRINITY_DN22283_c0_g1	proline-rich receptor-like protein kinase PERK1 [Medicago truncatula]	PERK1	GO:0004672(protein kinase activity);GO:0004674(protein serine/threonine kinase activity);GO:0004675(transmembrane receptor protein serine/threonine kinase activity);GO:0005524(ATP binding);GO:0005886(plasma membrane);GO:0006468(protein phosphorylation);GO:0007166(cell surface receptor signaling pathway);GO:0009611(response to wounding);GO:0009620(response to fungus);GO:0016021(integral component …	NA	1975	9	NA	NA	2	0	0	135.058	2.2009e-59	2.88805e-58	yes
PC-5p-39746_142	TRINITY_DN22530_c0_g1	U-box domain-containing protein 7 [Medicago truncatula]	-	GO:0005634(nucleus);GO:0005737(cytoplasm)	NA	1311	8	2	4	NA	282.372	30.5633	0	0	0	yes
PC-5p-39746_142	TRINITY_DN22569_c0_g1	RNA recognition motif [Medicago truncatula]	Os04g0620700	GO:0000183(chromatin silencing at rDNA);GO:0003676(nucleic acid binding);GO:0003723(RNA binding);GO:0005634(nucleus);GO:0005730(nucleolus);GO:0006364(rRNA processing);GO:0031491(nucleosome binding)	NA	828	15.5	NA	NA	2	0	0	236.351	0	0	yes
PC-5p-39746_142	TRINITY_DN22569_c0_g1	RNA recognition motif [Medicago truncatula]	Os04g0620700	GO:0000183(chromatin silencing at rDNA);GO:0003676(nucleic acid binding);GO:0003723(RNA binding);GO:0005634(nucleus);GO:0005730(nucleolus);GO:0006364(rRNA processing);GO:0031491(nucleosome binding)	NA	920	10.5	NA	NA	3	0	0	101.293	1.0173e-44	7.03524e-44	yes
PC-5p-39746_142	TRINITY_DN22583_c0_g1	probable galacturonosyltransferase 4 [Medicago truncatula]	GAUT4	GO:0000139(Golgi membrane);GO:0005794(Golgi apparatus);GO:0016021(integral component of membrane);GO:0016051(carbohydrate biosynthetic process);GO:0016757(transferase activity, transferring glycosyl groups);GO:0045489(pectin biosynthetic process);GO:0047262(polygalacturonate 4-alpha-galacturonosyltransferase activity);GO:0071555(cell wall organization)	ko00520(Amino sugar and nucleotide sugar metabolism)	1864	5.5	NA	NA	4	0	0	33.7644	2.1684e-15	3.13149e-15	yes
PC-5p-39746_142	TRINITY_DN22595_c0_g2	cysteine desulfurase, mitochondrial [Medicago truncatula]	NIFS1	GO:0005515(protein binding);GO:0005524(ATP binding);GO:0005739(mitochondrion);GO:0008270(zinc ion binding);GO:0008483(transaminase activity);GO:0009507(chloroplast);GO:0016226(iron-sulfur cluster assembly);GO:0030170(pyridoxal phosphate binding);GO:0031071(cysteine desulfurase activity);GO:0044571([2Fe-2S] cluster assembly);GO:0051536(iron-sulfur cluster binding)	ko00730(Thiamine metabolism);ko04122(Sulfur relay system)	1189	11.5	NA	2	3	0	183.38	101.293	2.391e-39	1.33891e-38	yes
PC-5p-39746_142	TRINITY_DN22663_c0_g7	pumilio homolog 1 isoform X1 [Medicago truncatula]	APUM1	GO:0003723(RNA binding);GO:0003729(mRNA binding);GO:0003730(mRNA 3'-UTR binding);GO:0005737(cytoplasm);GO:0005829(cytosol);GO:0006417(regulation of translation)	NA	617	8	4	NA	NA	40.3388	0	0	3.0257e-18	5.71521e-18	yes
PC-5p-39746_142	TRINITY_DN22799_c0_g1	phosphoglycerate kinase 3, cytosolic [Medicago truncatula]	-	GO:0004618(phosphoglycerate kinase activity);GO:0004672(protein kinase activity);GO:0005524(ATP binding);GO:0005737(cytoplasm);GO:0005739(mitochondrion);GO:0005829(cytosol);GO:0006096(glycolytic process);GO:0009507(chloroplast);GO:0009536(plastid);GO:0009570(chloroplast stroma);GO:0009579(thylakoid);GO:0016020(membrane);GO:0019253(reductive pentose-phosphate cycle);GO:0046686(response to cadmium …	ko00010(Glycolysis / Gluconeogenesis);ko00710(Carbon fixation in photosynthetic organisms)	1323	10	2	2	2	1532.88	1528.16	1451.87	0.25246	0.254178	yes
PC-5p-39746_142	TRINITY_DN22856_c0_g1	ubiquitin carboxyl-terminal hydrolase 9 [Medicago truncatula]	UBP10	GO:0004197(cysteine-type endopeptidase activity);GO:0004843(thiol-dependent ubiquitin-specific protease activity);GO:0005634(nucleus);GO:0006511(ubiquitin-dependent protein catabolic process);GO:0016579(protein deubiquitination)	NA	1997	11	NA	NA	4	0	0	33.7644	2.1684e-15	3.13149e-15	yes
PC-5p-39746_142	TRINITY_DN22936_c0_g2	THO complex subunit 4A [Medicago truncatula]	ALY1	GO:0003676(nucleic acid binding);GO:0003729(mRNA binding);GO:0005515(protein binding);GO:0005654(nucleoplasm);GO:0051028(mRNA transport)	ko03040(Spliceosome);ko03013(RNA transport);ko03015(mRNA surveillance pathway)	784	12.5	NA	3	NA	0	61.1266	0	2.8349e-27	7.6679e-27	yes
PC-5p-39746_142	TRINITY_DN23074_c0_g4	putative oxidoreductase [Medicago truncatula]	HPR3	GO:0005737(cytoplasm);GO:0016616(oxidoreductase activity, acting on the CH-OH group of donors, NAD or NADP as acceptor);GO:0051287(NAD binding);GO:0055114(oxidation-reduction process)	ko00630(Glyoxylate and dicarboxylate metabolism);ko00260(Glycine, serine and threonine metabolism)	619	6.5	4	4	4	40.3388	30.5633	33.7644	0.49068	0.491154	yes
PC-5p-39746_142	TRINITY_DN23118_c0_g1	protein CONSERVED IN THE GREEN LINEAGE AND DIATOMS 27, chloroplastic [Medicago truncatula]	ycf36	GO:0003674(molecular_function);GO:0009507(chloroplast);GO:0016021(integral component of membrane);GO:1990641(response to iron ion starvation)	NA	2883	8.5	NA	NA	3	0	0	101.293	1.0173e-44	7.03524e-44	yes
PC-5p-39746_142	TRINITY_DN23149_c0_g1	RAP domain-containing protein, chloroplastic [Medicago truncatula]	RAP	GO:0003723(RNA binding);GO:0005634(nucleus);GO:0006952(defense response);GO:0009507(chloroplast);GO:0042644(chloroplast nucleoid);GO:0042646(plastid nucleoid);GO:1901259(chloroplast rRNA processing)	NA	279	8.5	2	2	NA	282.372	183.38	0	3.7115e-58	4.83684e-57	yes
PC-5p-39746_142	TRINITY_DN23186_c0_g2	putative Zein-binding domain-containing protein [Medicago truncatula]	At1g18265	GO:0003674(molecular_function);GO:0008150(biological_process);GO:0016020(membrane)	NA	653	6	4	4	NA	40.3388	30.5633	0	7.2896e-09	7.93241e-09	yes
PC-5p-39746_142	TRINITY_DN23424_c1_g1	protein SRG1 [Medicago truncatula]	SRG1	GO:0051213(dioxygenase activity)	ko00941(Flavonoid biosynthesis)	714	7	NA	NA	2	0	0	101.293	1.0173e-44	7.03524e-44	yes
PC-5p-39746_142	TRINITY_DN23488_c0_g1	sister chromatid cohesion PDS5-like protein [Medicago truncatula]	pds5a-a	GO:0000785(chromatin);GO:0005634(nucleus);GO:0005739(mitochondrion);GO:0005829(cytosol);GO:0006281(DNA repair);GO:0007064(mitotic sister chromatid cohesion);GO:0009507(chloroplast);GO:0009556(microsporogenesis)	NA	3832	10	NA	4	4	0	30.5633	33.7644	9.1976e-08	9.66516e-08	yes
PC-5p-39746_142	TRINITY_DN23535_c0_g2	uncharacterized protein LOC25487643 [Medicago truncatula]	-	GO:0008150(biological_process);GO:0016746(transferase activity, transferring acyl groups)	NA	981	5.5	NA	2	2	0	91.6898	135.058	4.7583e-28	1.52068e-27	yes
PC-5p-39746_142	TRINITY_DN23648_c0_g1	structural maintenance of chromosomes protein 1 [Medicago truncatula]	SMC1	GO:0000780(condensed nuclear chromosome, centromeric region);GO:0003682(chromatin binding);GO:0003690(double-stranded DNA binding);GO:0005515(protein binding);GO:0005524(ATP binding);GO:0007064(mitotic sister chromatid cohesion);GO:0030892(mitotic cohesin complex);GO:0034990(nuclear mitotic cohesin complex);GO:0061775(cohesin ATPase activity);GO:0061776(topological DNA entrapment activity);GO:006…	NA	2128	9.5	4	NA	NA	40.3388	0	0	3.0257e-18	5.71521e-18	yes
PC-5p-39746_142	TRINITY_DN23752_c0_g1	putative transcription factor MYB-HB-like family [Medicago truncatula]	-	GO:0003677(DNA binding);GO:0003700(DNA binding transcription factor activity);GO:0005634(nucleus)	NA	215	7	NA	4	4	0	30.5633	33.7644	9.1976e-08	9.66516e-08	yes
PC-5p-39746_142	TRINITY_DN23777_c0_g1	protochlorophyllide-dependent translocon component 52, chloroplastic [Medicago truncatula]	PTC52	GO:0009055(electron transfer activity);GO:0009507(chloroplast);GO:0009536(plastid);GO:0009706(chloroplast inner membrane);GO:0009941(chloroplast envelope);GO:0010277(chlorophyllide a oxygenase [overall] activity);GO:0015031(protein transport);GO:0016021(integral component of membrane);GO:0046872(metal ion binding);GO:0051537(2 iron, 2 sulfur cluster binding);GO:0055114(oxidation-reduction process)	ko00860(Porphyrin and chlorophyll metabolism)	1213	16	4	3	NA	40.3388	91.6898	0	1.4416e-21	3.51602e-21	yes
PC-5p-39746_142	TRINITY_DN23873_c1_g2	ubiquitin carboxyl-terminal hydrolase MINDY-3 isoform X2 [Medicago truncatula]	FAM188A	GO:0003674(molecular_function);GO:0005634(nucleus);GO:0005829(cytosol);GO:0008150(biological_process)	NA	462	9	4	NA	4	40.3388	0	33.7644	5.8097e-09	6.43576e-09	yes
PC-5p-39746_142	TRINITY_DN24101_c0_g1	receptor-like serine/threonine-protein kinase At2g45590 [Medicago truncatula]	At2g45590	GO:0004674(protein serine/threonine kinase activity);GO:0005886(plasma membrane)	NA	1138	11.5	NA	4	3	0	30.5633	67.5288	6.4851e-16	1.17172e-15	yes
PC-5p-39746_142	TRINITY_DN24114_c0_g4	E3 ubiquitin-protein ligase RHF2A, putative [Medicago truncatula]	RHF1A	GO:0000209(protein polyubiquitination);GO:0043161(proteasome-mediated ubiquitin-dependent protein catabolic process);GO:0061630(ubiquitin protein ligase activity)	NA	984	10	NA	2	NA	0	91.6898	0	1.508e-40	8.68797e-40	yes
PC-5p-39746_142	TRINITY_DN24249_c0_g3	malate dehydrogenase, cytoplasmic [Medicago truncatula]	CMDH	GO:0005515(protein binding);GO:0005634(nucleus);GO:0005737(cytoplasm);GO:0005773(vacuole);GO:0005774(vacuolar membrane);GO:0005794(Golgi apparatus);GO:0005829(cytosol);GO:0005886(plasma membrane);GO:0005975(carbohydrate metabolic process);GO:0006099(tricarboxylic acid cycle);GO:0006107(oxaloacetate metabolic process);GO:0006108(malate metabolic process);GO:0006734(NADH metabolic process);GO:00095…	ko00020(Citrate cycle (TCA cycle));ko00620(Pyruvate metabolism);ko00630(Glyoxylate and dicarboxylate metabolism);ko00710(Carbon fixation in photosynthetic organisms);ko00270(Cysteine and methionine metabolism)	750	6	NA	4	NA	0	30.5633	0	5.326e-14	6.30988e-14	yes
PC-5p-39746_142	TRINITY_DN24326_c0_g1	calnexin homolog [Medicago truncatula]	-	GO:0005509(calcium ion binding);GO:0005739(mitochondrion);GO:0005773(vacuole);GO:0005774(vacuolar membrane);GO:0005783(endoplasmic reticulum);GO:0005789(endoplasmic reticulum membrane);GO:0005794(Golgi apparatus);GO:0005886(plasma membrane);GO:0006457(protein folding);GO:0009505(plant-type cell wall);GO:0009506(plasmodesma);GO:0009507(chloroplast);GO:0016020(membrane);GO:0016021(integral componen…	ko04141(Protein processing in endoplasmic reticulum);ko04145(Phagosome)	1116	4.5	NA	4	NA	0	30.5633	0	5.326e-14	6.30988e-14	yes
PC-5p-39746_142	TRINITY_DN24326_c0_g2	Calnexin 2 [Medicago truncatula]	-	GO:0005509(calcium ion binding);GO:0005739(mitochondrion);GO:0005773(vacuole);GO:0005774(vacuolar membrane);GO:0005783(endoplasmic reticulum);GO:0005789(endoplasmic reticulum membrane);GO:0005794(Golgi apparatus);GO:0005886(plasma membrane);GO:0006457(protein folding);GO:0009505(plant-type cell wall);GO:0009506(plasmodesma);GO:0009507(chloroplast);GO:0016020(membrane);GO:0016021(integral componen…	ko04141(Protein processing in endoplasmic reticulum);ko04145(Phagosome)	1142	5.5	3	3	2	282.372	183.38	405.173	3.3603e-19	7.68705e-19	yes
PC-5p-39746_142	TRINITY_DN24362_c0_g1	protein AUXIN SIGNALING F-BOX 2 [Medicago truncatula]	AFB2	GO:0000822(inositol hexakisphosphate binding);GO:0009734(auxin-activated signaling pathway)	ko04075(Plant hormone signal transduction)	2136	11.5	2	2	2	363.05	427.886	979.167	3.8431e-85	1.16417e-83	yes
PC-5p-39746_142	TRINITY_DN24494_c0_g1	sugar transporter ERD6-like 5 isoform X2 [Medicago truncatula]	At1g54730	GO:0005351(carbohydrate:proton symporter activity);GO:0005355(glucose transmembrane transporter activity);GO:0005887(integral component of plasma membrane);GO:0046323(glucose import)	NA	161	7	3	4	4	80.6777	30.5633	33.7644	8.4639e-08	9.13434e-08	yes
PC-5p-39746_142	TRINITY_DN24503_c0_g1	auxilin-like protein 1 [Medicago truncatula]	AUL1	GO:0006457(protein folding);GO:0006898(receptor-mediated endocytosis);GO:0009507(chloroplast);GO:0030276(clathrin binding);GO:0031982(vesicle);GO:0043231(intracellular membrane-bounded organelle)	NA	4257	5.5	4	NA	NA	40.3388	0	0	3.0257e-18	5.71521e-18	yes
PC-5p-39746_142	TRINITY_DN24582_c0_g2	phosphatidylinositol 3-kinase, root isoform [Medicago truncatula]	-	GO:0005942(phosphatidylinositol 3-kinase complex);GO:0016303(1-phosphatidylinositol-3-kinase activity)	ko00562(Inositol phosphate metabolism);ko04070(Phosphatidylinositol signaling system);ko04145(Phagosome);ko04136(Autophagy - other eukaryotes)	1483	8	4	NA	NA	40.3388	0	0	3.0257e-18	5.71521e-18	yes
PC-5p-39746_142	TRINITY_DN24729_c0_g1	uncharacterized protein LOC112418687 [Medicago truncatula]	-	NA	NA	1020	9	NA	2	NA	0	61.1266	0	2.8349e-27	7.6679e-27	yes
PC-5p-39746_142	TRINITY_DN24774_c0_g1	uncharacterized protein LOC25487287 [Medicago truncatula]	-	GO:0005634(nucleus);GO:0009507(chloroplast);GO:0010207(photosystem II assembly);GO:0016301(kinase activity);GO:0016310(phosphorylation)	NA	926	5	3	3	2	121.017	61.1266	236.351	2.0043e-25	5.22881e-25	yes
PC-5p-39746_142	TRINITY_DN24825_c0_g1	heat shock cognate 70 kDa protein 2 [Cicer arietinum]	HSC-2	GO:0005524(ATP binding);GO:0005618(cell wall);GO:0005634(nucleus);GO:0005739(mitochondrion);GO:0005774(vacuolar membrane);GO:0005794(Golgi apparatus);GO:0005829(cytosol);GO:0005886(plasma membrane);GO:0006351(transcription, DNA-templated);GO:0006355(regulation of transcription, DNA-templated);GO:0006457(protein folding);GO:0006986(response to unfolded protein);GO:0009266(response to temperature s…	ko03040(Spliceosome);ko04141(Protein processing in endoplasmic reticulum);ko04144(Endocytosis)	454	9.5	NA	3	4	0	61.1266	33.7644	1.3397e-13	1.5644e-13	yes
PC-5p-39746_142	TRINITY_DN24871_c0_g1	F-box/kelch-repeat protein At2g44130 [Medicago truncatula]	At1g15670	GO:0004842(ubiquitin-protein transferase activity);GO:0031463(Cul3-RING ubiquitin ligase complex)	NA	767	15	NA	NA	4	0	0	33.7644	2.1684e-15	3.13149e-15	yes
PC-5p-39746_142	TRINITY_DN24906_c0_g3	replication factor-A carboxy-terminal domain protein [Medicago truncatula]	-	NA	ko03030(DNA replication);ko03420(Nucleotide excision repair);ko03430(Mismatch repair);ko03440(Homologous recombination)	1139	7.5	NA	4	NA	0	30.5633	0	5.326e-14	6.30988e-14	yes
PC-5p-39746_142	TRINITY_DN24920_c2_g1	mannose-1-phosphate guanylyltransferase 1 [Medicago truncatula]	CYT1	GO:0004475(mannose-1-phosphate guanylyltransferase activity);GO:0005515(protein binding);GO:0005525(GTP binding);GO:0005634(nucleus);GO:0005737(cytoplasm);GO:0005829(cytosol);GO:0009058(biosynthetic process);GO:0009298(GDP-mannose biosynthetic process);GO:0009408(response to heat);GO:0009651(response to salt stress);GO:0009753(response to jasmonic acid);GO:0010193(response to ozone);GO:0016779(nu…	ko00051(Fructose and mannose metabolism);ko00520(Amino sugar and nucleotide sugar metabolism)	608	7.5	NA	4	3	0	30.5633	67.5288	6.4851e-16	1.17172e-15	yes
PC-5p-39746_142	TRINITY_DN25057_c1_g1	ribulose bisphosphate carboxylase/oxygenase activase 2, chloroplastic [Medicago truncatula]	RCA2	GO:0005524(ATP binding);GO:0005618(cell wall);GO:0005634(nucleus);GO:0009409(response to cold);GO:0009416(response to light stimulus);GO:0009507(chloroplast);GO:0009535(chloroplast thylakoid membrane);GO:0009570(chloroplast stroma);GO:0009579(thylakoid);GO:0009753(response to jasmonic acid);GO:0009941(chloroplast envelope);GO:0010150(leaf senescence);GO:0010287(plastoglobule);GO:0010319(stromule)…	ko03010(Ribosome)	1276	6	2	2	2	11254.5	23380.9	11007.2	0	0	yes
PC-5p-39746_142	TRINITY_DN25354_c0_g2	hypothetical protein MtrunA17_Chr4g0068421 [Medicago truncatula]	-	NA	NA	425	9	NA	NA	4	0	0	33.7644	2.1684e-15	3.13149e-15	yes
PC-5p-39746_142	TRINITY_DN25354_c0_g2	hypothetical protein MtrunA17_Chr4g0068421 [Medicago truncatula]	-	NA	NA	549	11.5	4	NA	4	40.3388	0	33.7644	5.8097e-09	6.43576e-09	yes
PC-5p-39746_142	TRINITY_DN25458_c0_g2	Galactose-binding like [Medicago truncatula]	PP2A1	GO:0005634(nucleus);GO:0009625(response to insect);GO:0030246(carbohydrate binding);GO:0043394(proteoglycan binding)	NA	361	11	NA	2	2	0	244.506	135.058	3.1852e-52	2.9422e-51	yes
PC-5p-39746_142	TRINITY_DN25677_c0_g1	protein TIME FOR COFFEE [Medicago truncatula]	TIC	GO:0003674(molecular_function);GO:0005634(nucleus);GO:0005982(starch metabolic process);GO:0006979(response to oxidative stress);GO:0009414(response to water deprivation);GO:0009737(response to abscisic acid);GO:0032502(developmental process);GO:0042752(regulation of circadian rhythm);GO:0048511(rhythmic process)	NA	586	13.5	NA	NA	2	0	0	101.293	1.0173e-44	7.03524e-44	yes
PC-5p-39746_142	TRINITY_DN25765_c0_g1	putative ATPase, AAA-type, core, Clp protease, ATP-binding subunit ClpX [Medicago truncatula]	CLPX3	GO:0004176(ATP-dependent peptidase activity);GO:0005524(ATP binding);GO:0005759(mitochondrial matrix);GO:0006508(proteolysis);GO:0030163(protein catabolic process)	NA	789	9	NA	4	NA	0	30.5633	0	5.326e-14	6.30988e-14	yes
PC-5p-39746_142	TRINITY_DN25918_c0_g1	protein starmaker [Medicago truncatula]	SRRM2	GO:0003333(amino acid transmembrane transport);GO:0015171(amino acid transmembrane transporter activity)	NA	2780	7.5	NA	4	NA	0	30.5633	0	5.326e-14	6.30988e-14	yes
PC-5p-39746_142	TRINITY_DN25935_c0_g1	protein TSS [Medicago truncatula]	TSS	GO:0005737(cytoplasm);GO:0005829(cytosol);GO:0008150(biological_process)	NA	1016	16.5	2	3	2	524.405	91.6898	270.115	2.8482e-70	5.30082e-69	yes
PC-5p-39746_142	TRINITY_DN25956_c1_g2	monooxygenase 2 isoform X2 [Medicago truncatula]	hpxO	GO:0004497(monooxygenase activity);GO:0044550(secondary metabolite biosynthetic process)	ko00906(Carotenoid biosynthesis)	670	20	NA	NA	2	0	0	67.5288	4.6985e-30	1.53517e-29	yes
PC-5p-39746_142	TRINITY_DN26090_c1_g2	putative post-transcriptional gene silencing PAZ-Argonaute family protein [Medicago truncatula]	AGO4	GO:0003682(chromatin binding);GO:0004521(endoribonuclease activity);GO:0005515(protein binding);GO:0005634(nucleus);GO:0005654(nucleoplasm);GO:0005719(nuclear euchromatin);GO:0005730(nucleolus);GO:0005829(cytosol);GO:0006306(DNA methylation);GO:0006342(chromatin silencing);GO:0006351(transcription, DNA-templated);GO:0006417(regulation of translation);GO:0009816(defense response to bacterium, inco…	NA	1693	7.5	4	2	4	40.3388	61.1266	33.7644	0.010824	0.0109988	yes
PC-5p-39746_142	TRINITY_DN26110_c1_g1	DEAD-box ATP-dependent RNA helicase 7-like [Cicer arietinum]	RH7	GO:0004004(ATP-dependent RNA helicase activity);GO:0010501(RNA secondary structure unwinding)	NA	2095	8	NA	2	4	0	183.38	33.7644	6.9526e-58	8.94804e-57	yes
PC-5p-39746_142	TRINITY_DN26423_c5_g3	ABC transporter C family member 8 [Cicer arietinum]	ABCC8	GO:0000325(plant-type vacuole);GO:0005524(ATP binding);GO:0005774(vacuolar membrane);GO:0005886(plasma membrane);GO:0008559(xenobiotic transmembrane transporting ATPase activity);GO:0016021(integral component of membrane);GO:0042626(ATPase activity, coupled to transmembrane movement of substances);GO:0055085(transmembrane transport)	ko02010(ABC transporters)	1909	5.5	4	NA	NA	40.3388	0	0	3.0257e-18	5.71521e-18	yes
PC-5p-400_9674	TRINITY_DN11605_c0_g1	germin-like protein subfamily 3 member 2 [Medicago truncatula]	At3g10080	GO:0005618(cell wall);GO:0033609(oxalate metabolic process);GO:0046564(oxalate decarboxylase activity)	NA	630	3	2	2	NA	121.017	91.6898	0	3.8632e-25	1.00369e-24	yes
PC-5p-400_9674	TRINITY_DN12125_c0_g1	60S ribosomal protein L9 [Medicago truncatula]	RPL9	GO:0002181(cytoplasmic translation);GO:0003723(RNA binding);GO:0003735(structural constituent of ribosome);GO:0022625(cytosolic large ribosomal subunit)	ko03010(Ribosome)	609	13	NA	NA	4	0	0	33.7644	2.1684e-15	3.13149e-15	yes
PC-5p-400_9674	TRINITY_DN12253_c0_g1	myosin-binding protein 1 [Medicago truncatula]	At1g18265	GO:0003674(molecular_function);GO:0005737(cytoplasm);GO:0008150(biological_process)	NA	668	7.5	NA	2	2	0	91.6898	135.058	4.7583e-28	1.52068e-27	yes
PC-5p-400_9674	TRINITY_DN13441_c0_g1	histidine--tRNA ligase, chloroplastic/mitochondrial [Medicago truncatula]	At3g46100	GO:0004821(histidine-tRNA ligase activity);GO:0005737(cytoplasm);GO:0006427(histidyl-tRNA aminoacylation)	ko00970(Aminoacyl-tRNA biosynthesis)	552	7	NA	NA	2	0	0	101.293	1.0173e-44	7.03524e-44	yes
PC-5p-400_9674	TRINITY_DN14612_c0_g1	serine acetyltransferase 5 [Medicago truncatula]	SAT5	GO:0005737(cytoplasm);GO:0005829(cytosol);GO:0006535(cysteine biosynthetic process from serine);GO:0009001(serine O-acetyltransferase activity);GO:0019344(cysteine biosynthetic process)	ko00920(Sulfur metabolism);ko00270(Cysteine and methionine metabolism)	844	19	2	4	NA	121.017	30.5633	0	9.1063e-35	3.97245e-34	yes
PC-5p-400_9674	TRINITY_DN14946_c0_g2	uncharacterized protein LOC11429049 [Medicago truncatula]	-	NA	NA	120	9	NA	NA	4	0	0	33.7644	2.1684e-15	3.13149e-15	yes
PC-5p-400_9674	TRINITY_DN15512_c1_g1	uncharacterized protein LOC11420499 [Medicago truncatula]	rpsO	GO:0003735(structural constituent of ribosome);GO:0006412(translation);GO:0009507(chloroplast);GO:0015935(small ribosomal subunit)	ko03010(Ribosome)	654	6	NA	NA	4	0	0	33.7644	2.1684e-15	3.13149e-15	yes
PC-5p-400_9674	TRINITY_DN15649_c0_g1	putative disease resistance protein At4g11170 [Medicago truncatula]	-	NA	NA	487	5.5	NA	2	NA	0	61.1266	0	2.8349e-27	7.6679e-27	yes
PC-5p-400_9674	TRINITY_DN15932_c0_g2	rhomboid-like protein 11, chloroplastic [Medicago truncatula]	RBL11	GO:0004252(serine-type endopeptidase activity);GO:0016485(protein processing)	NA	749	9.5	NA	4	NA	0	30.5633	0	5.326e-14	6.30988e-14	yes
PC-5p-400_9674	TRINITY_DN15957_c1_g2	unknown [Medicago truncatula]	-	GO:0005618(cell wall);GO:0008150(biological_process)	NA	377	8	4	NA	NA	40.3388	0	0	3.0257e-18	5.71521e-18	yes
PC-5p-400_9674	TRINITY_DN16042_c1_g3	dof zinc finger protein DOF3.4-like [Cicer arietinum]	DOF3.4	GO:0003677(DNA binding);GO:0003700(DNA binding transcription factor activity);GO:0005515(protein binding);GO:0005634(nucleus);GO:0006351(transcription, DNA-templated);GO:0009733(response to auxin);GO:0009751(response to salicylic acid);GO:0042545(cell wall modification);GO:0044212(transcription regulatory region DNA binding);GO:0045787(positive regulation of cell cycle);GO:0045893(positive regula…	NA	1028	9	NA	2	NA	0	61.1266	0	2.8349e-27	7.6679e-27	yes
PC-5p-400_9674	TRINITY_DN16344_c0_g2	probable glycerol-3-phosphate acyltransferase 8 [Medicago truncatula]	GPAT8	GO:0010143(cutin biosynthetic process);GO:0016020(membrane);GO:0016311(dephosphorylation);GO:0016791(phosphatase activity);GO:0090447(glycerol-3-phosphate 2-O-acyltransferase activity)	ko00561(Glycerolipid metabolism);ko00564(Glycerophospholipid metabolism)	510	6	NA	NA	4	0	0	33.7644	2.1684e-15	3.13149e-15	yes
PC-5p-400_9674	TRINITY_DN16396_c0_g5	hypothetical protein TSUD_281080 [Trifolium subterraneum]	-	NA	NA	1022	13	NA	NA	4	0	0	33.7644	2.1684e-15	3.13149e-15	yes
PC-5p-400_9674	TRINITY_DN16462_c0_g2	serine carboxypeptidase-like 51 [Medicago truncatula]	SCPL51	GO:0004185(serine-type carboxypeptidase activity);GO:0051603(proteolysis involved in cellular protein catabolic process)	NA	457	10.5	4	2	NA	40.3388	91.6898	0	1.4416e-21	3.51602e-21	yes
PC-5p-400_9674	TRINITY_DN16554_c0_g1	28S ribosomal protein S29, mitochondrial [Medicago truncatula]	-	GO:0003735(structural constituent of ribosome);GO:0005763(mitochondrial small ribosomal subunit)	NA	908	9	NA	NA	4	0	0	33.7644	2.1684e-15	3.13149e-15	yes
PC-5p-400_9674	TRINITY_DN17393_c0_g1	uncharacterized protein LOC25485992 [Medicago truncatula]	-	GO:0005794(Golgi apparatus);GO:0008270(zinc ion binding);GO:0016020(membrane);GO:0016021(integral component of membrane)	NA	310	12	NA	NA	3	0	0	67.5288	4.6985e-30	1.53517e-29	yes
PC-5p-400_9674	TRINITY_DN17440_c0_g1	pentatricopeptide repeat-containing protein PNM1, mitochondrial [Medicago truncatula]	PNM1	GO:0003723(RNA binding);GO:0003729(mRNA binding);GO:0004519(endonuclease activity);GO:0005515(protein binding);GO:0005634(nucleus);GO:0005739(mitochondrion);GO:0005759(mitochondrial matrix);GO:0006351(transcription, DNA-templated);GO:0006355(regulation of transcription, DNA-templated);GO:0006417(regulation of translation);GO:0009451(RNA modification);GO:0043231(intracellular membrane-bounded orga…	NA	695	14.5	NA	NA	2	0	0	67.5288	4.6985e-30	1.53517e-29	yes
PC-5p-400_9674	TRINITY_DN17826_c0_g1	protein ECERIFERUM 26-like [Medicago truncatula]	CER26L	GO:0009535(chloroplast thylakoid membrane);GO:0009555(pollen development);GO:0016740(transferase activity);GO:0016747(transferase activity, transferring acyl groups other than amino-acyl groups);GO:0042761(very long-chain fatty acid biosynthetic process);GO:0071555(cell wall organization)	ko00940(Phenylpropanoid biosynthesis);ko00945(Stilbenoid, diarylheptanoid and gingerol biosynthesis);ko00941(Flavonoid biosynthesis)	1338	8	4	2	3	40.3388	152.816	101.293	9.3536e-15	1.33623e-14	yes
PC-5p-400_9674	TRINITY_DN18056_c0_g2	putative RNA recognition motif domain, nucleotide-binding alpha-beta plait domain-containing protein [Medicago truncatula]	RNP1	GO:0003723(RNA binding);GO:0003729(mRNA binding);GO:0005576(extracellular region)	ko03015(mRNA surveillance pathway)	1428	9	4	NA	NA	40.3388	0	0	3.0257e-18	5.71521e-18	yes
PC-5p-400_9674	TRINITY_DN18944_c0_g2	ubiquitin domain-containing protein DSK2a isoform X1 [Medicago truncatula]	DSK2A	GO:0005515(protein binding);GO:0005634(nucleus);GO:0005829(cytosol);GO:0031593(polyubiquitin modification-dependent protein binding)	ko04141(Protein processing in endoplasmic reticulum)	1591	13	2	2	2	201.694	275.07	236.351	0.0034494	0.00352966	yes
PC-5p-400_9674	TRINITY_DN18973_c0_g1	uncharacterized protein LOC11426577 [Medicago truncatula]	-	GO:0005509(calcium ion binding);GO:0005794(Golgi apparatus);GO:0006004(fucose metabolic process);GO:0016021(integral component of membrane);GO:0016757(transferase activity, transferring glycosyl groups);GO:0042175(nuclear outer membrane-endoplasmic reticulum membrane network)	NA	955	7	2	NA	2	161.355	0	337.644	3.3387e-75	7.98903e-74	yes
PC-5p-400_9674	TRINITY_DN19093_c1_g3	probable alpha,alpha-trehalose-phosphate synthase [UDP-forming] 7 [Medicago truncatula]	TPS7	GO:0003825(alpha,alpha-trehalose-phosphate synthase (UDP-forming) activity);GO:0004805(trehalose-phosphatase activity);GO:0005634(nucleus);GO:0005829(cytosol);GO:0005992(trehalose biosynthetic process);GO:0016757(transferase activity, transferring glycosyl groups);GO:0016791(phosphatase activity);GO:0070413(trehalose metabolism in response to stress)	ko00500(Starch and sucrose metabolism)	299	16	NA	4	NA	0	30.5633	0	5.326e-14	6.30988e-14	yes
PC-5p-400_9674	TRINITY_DN19339_c1_g1	protein IQ-DOMAIN 1 [Medicago truncatula]	IQD1	GO:0005516(calmodulin binding);GO:0005634(nucleus);GO:0005886(plasma membrane);GO:0008150(biological_process)	NA	856	11	NA	2	2	0	61.1266	67.5288	8.4537e-15	1.20888e-14	yes
PC-5p-400_9674	TRINITY_DN19445_c0_g2	ethylene-responsive transcription factor ERF023 [Medicago truncatula]	ERF023	GO:0003677(DNA binding);GO:0003700(DNA binding transcription factor activity);GO:0005634(nucleus);GO:0006351(transcription, DNA-templated);GO:0006355(regulation of transcription, DNA-templated);GO:0009873(ethylene-activated signaling pathway)	NA	271	6.5	NA	2	4	0	91.6898	33.7644	4.639e-23	1.16692e-22	yes
PC-5p-400_9674	TRINITY_DN19551_c0_g2	uncharacterized protein LOC11422612 isoform X2 [Medicago truncatula]	GIP1	GO:0005634(nucleus)	NA	136	9	NA	4	NA	0	30.5633	0	5.326e-14	6.30988e-14	yes
PC-5p-400_9674	TRINITY_DN20156_c0_g2	phospho-2-dehydro-3-deoxyheptonate aldolase 1, chloroplastic [Medicago truncatula]	DHAPS-1	GO:0003849(3-deoxy-7-phosphoheptulonate synthase activity);GO:0009073(aromatic amino acid family biosynthetic process);GO:0009423(chorismate biosynthetic process);GO:0009507(chloroplast);GO:0009536(plastid);GO:0016020(membrane)	ko00400(Phenylalanine, tyrosine and tryptophan biosynthesis)	593	7	4	2	4	40.3388	213.943	33.7644	5.8755e-48	5.02417e-47	yes
PC-5p-400_9674	TRINITY_DN20292_c0_g3	LOW QUALITY PROTEIN: E3 ubiquitin-protein ligase KEG [Medicago truncatula]	KEG	GO:0004674(protein serine/threonine kinase activity);GO:0004842(ubiquitin-protein transferase activity);GO:0005769(early endosome);GO:0005802(trans-Golgi network);GO:0006468(protein phosphorylation);GO:0009788(negative regulation of abscisic acid-activated signaling pathway);GO:0045324(late endosome to vacuole transport)	NA	5090	9	4	4	2	40.3388	30.5633	135.058	8.4463e-22	2.09868e-21	yes
PC-5p-400_9674	TRINITY_DN20333_c0_g2	nucleolar complex protein 4 homolog isoform X1 [Medicago truncatula]	noc4l-b	GO:0000462(maturation of SSU-rRNA from tricistronic rRNA transcript (SSU-rRNA, 5.8S rRNA, LSU-rRNA));GO:0005730(nucleolus);GO:0030692(Noc4p-Nop14p complex);GO:0032040(small-subunit processome)	NA	1632	13.5	NA	NA	4	0	0	33.7644	2.1684e-15	3.13149e-15	yes
PC-5p-400_9674	TRINITY_DN20837_c1_g2	uncharacterized protein LOC11437173 isoform X2 [Medicago truncatula]	-	GO:0003674(molecular_function);GO:0008150(biological_process);GO:0016021(integral component of membrane)	NA	2163	8	4	2	NA	40.3388	91.6898	0	1.4416e-21	3.51602e-21	yes
PC-5p-400_9674	TRINITY_DN21208_c0_g2	probable serine/threonine-protein kinase WNK9 [Medicago truncatula]	WNK1	GO:0004674(protein serine/threonine kinase activity);GO:0005829(cytosol);GO:0006468(protein phosphorylation);GO:0035556(intracellular signal transduction)	NA	596	8.5	4	NA	4	40.3388	0	33.7644	5.8097e-09	6.43576e-09	yes
PC-5p-400_9674	TRINITY_DN21290_c0_g2	succinate dehydrogenase [ubiquinone] flavoprotein subunit [Medicago truncatula]	SDH1-1	GO:0000104(succinate dehydrogenase activity);GO:0005524(ATP binding);GO:0005618(cell wall);GO:0005739(mitochondrion);GO:0005749(mitochondrial respiratory chain complex II, succinate dehydrogenase complex (ubiquinone));GO:0005794(Golgi apparatus);GO:0006099(tricarboxylic acid cycle);GO:0006121(mitochondrial electron transport, succinate to ubiquinone);GO:0008177(succinate dehydrogenase (ubiquinone…	ko00020(Citrate cycle (TCA cycle));ko00190(Oxidative phosphorylation)	973	8	2	2	2	524.405	275.07	472.701	1.8107e-18	4.13056e-18	yes
PC-5p-400_9674	TRINITY_DN21391_c0_g1	vicilin-like seed storage protein At2g18540 [Cicer arietinum]	-	GO:0003674(molecular_function);GO:0005634(nucleus);GO:0008150(biological_process)	NA	338	9	4	NA	4	40.3388	0	33.7644	5.8097e-09	6.43576e-09	yes
PC-5p-400_9674	TRINITY_DN21622_c0_g1	nudix hydrolase 19, chloroplastic [Medicago truncatula]	NUDT19	GO:0000210(NAD+ diphosphatase activity);GO:0005829(cytosol);GO:0009507(chloroplast);GO:0016787(hydrolase activity);GO:0035529(NADH pyrophosphatase activity);GO:0046872(metal ion binding)	ko00760(Nicotinate and nicotinamide metabolism);ko04146(Peroxisome)	391	5	2	0	4	242.033	305.633	33.7644	4.7512e-46	3.98499e-45	yes
PC-5p-400_9674	TRINITY_DN21713_c1_g1	hypothetical protein TSUD_137000 [Trifolium subterraneum]	rnj	GO:0003824(catalytic activity);GO:0009507(chloroplast);GO:0009658(chloroplast organization);GO:0009793(embryo development ending in seed dormancy);GO:0009942(longitudinal axis specification);GO:0060918(auxin transport)	NA	802	8.5	2	NA	NA	121.017	0	0	2.761e-53	2.58192e-52	yes
PC-5p-400_9674	TRINITY_DN21788_c0_g1	uncharacterized oxidoreductase At1g06690, chloroplastic [Medicago truncatula]	At1g06690	GO:0004033(aldo-keto reductase (NADP) activity);GO:0005737(cytoplasm);GO:0008270(zinc ion binding);GO:0009507(chloroplast);GO:0009535(chloroplast thylakoid membrane);GO:0009941(chloroplast envelope);GO:0010287(plastoglobule);GO:0016491(oxidoreductase activity);GO:0055114(oxidation-reduction process)	ko00750(Vitamin ko6 metabolism)	1326	8	NA	NA	4	0	0	33.7644	2.1684e-15	3.13149e-15	yes
PC-5p-400_9674	TRINITY_DN22003_c0_g1	F-box protein At2g26160 [Medicago truncatula]	At2g26160	GO:0003677(DNA binding);GO:0005634(nucleus);GO:0005694(chromosome);GO:0005737(cytoplasm);GO:0006260(DNA replication);GO:0006284(base-excision repair);GO:0006302(double-strand break repair);GO:0006310(DNA recombination);GO:0009378(four-way junction helicase activity);GO:0032508(DNA duplex unwinding);GO:0043140(ATP-dependent 3'-5' DNA helicase activity)	NA	542	4	NA	NA	2	0	0	67.5288	4.6985e-30	1.53517e-29	yes
PC-5p-400_9674	TRINITY_DN22268_c0_g3	unknown [Medicago truncatula]	NAP1;3	GO:0000724(double-strand break repair via homologous recombination);GO:0003677(DNA binding);GO:0003682(chromatin binding);GO:0005515(protein binding);GO:0005634(nucleus);GO:0005737(cytoplasm);GO:0005829(cytosol);GO:0006281(DNA repair);GO:0006334(nucleosome assembly);GO:0009294(DNA mediated transformation);GO:0016444(somatic cell DNA recombination);GO:0042393(histone binding);GO:0042802(identical …	NA	1057	9	NA	4	3	0	30.5633	67.5288	6.4851e-16	1.17172e-15	yes
PC-5p-400_9674	TRINITY_DN23718_c0_g3	CRM-domain containing factor CFM3A, chloroplastic/mitochondrial [Medicago truncatula]	CFM3A	GO:0000373(Group II intron splicing);GO:0009507(chloroplast);GO:0048316(seed development)	ko03018(RNA degradation)	707	6.5	4	NA	4	40.3388	0	33.7644	5.8097e-09	6.43576e-09	yes
PC-5p-400_9674	TRINITY_DN23754_c2_g1	homeobox-leucine zipper protein ATHB-6 [Medicago truncatula]	ATHB-16	GO:0003700(DNA binding transcription factor activity);GO:0005634(nucleus);GO:0006351(transcription, DNA-templated);GO:0006355(regulation of transcription, DNA-templated);GO:0009637(response to blue light);GO:0030308(negative regulation of cell growth);GO:0043565(sequence-specific DNA binding);GO:0045893(positive regulation of transcription, DNA-templated);GO:0048510(regulation of timing of transi…	NA	2162	7	NA	3	NA	0	61.1266	0	2.8349e-27	7.6679e-27	yes
PC-5p-400_9674	TRINITY_DN23772_c0_g2	putative UDP-glucuronate decarboxylase [Medicago truncatula]	UXS1	GO:0000139(Golgi membrane);GO:0003824(catalytic activity);GO:0005768(endosome);GO:0005794(Golgi apparatus);GO:0005802(trans-Golgi network);GO:0005829(cytosol);GO:0005886(plasma membrane);GO:0008460(dTDP-glucose 4,6-dehydratase activity);GO:0009225(nucleotide-sugar metabolic process);GO:0016020(membrane);GO:0016021(integral component of membrane);GO:0019305(dTDP-rhamnose biosynthetic process);GO:0…	ko00520(Amino sugar and nucleotide sugar metabolism)	408	8.5	4	NA	NA	40.3388	0	0	3.0257e-18	5.71521e-18	yes
PC-5p-400_9674	TRINITY_DN23883_c0_g1	transcription factor [Medicago truncatula]	ASIL2	GO:0003700(DNA binding transcription factor activity);GO:0005634(nucleus);GO:0006355(regulation of transcription, DNA-templated);GO:0019760(glucosinolate metabolic process);GO:0043565(sequence-specific DNA binding);GO:0044212(transcription regulatory region DNA binding)	ko00130(Ubiquinone and other terpenoid-quinone biosynthesis)	1051	10.5	NA	NA	2	0	0	135.058	2.2009e-59	2.88805e-58	yes
PC-5p-400_9674	TRINITY_DN23891_c1_g5	hypothetical protein MtrDRAFT_AC161399g3v2 [Medicago truncatula]	-	NA	NA	124	10	NA	2	NA	0	61.1266	0	2.8349e-27	7.6679e-27	yes
PC-5p-400_9674	TRINITY_DN24044_c0_g1	probable fructokinase-7 isoform X2 [Medicago truncatula]	At5g51830	GO:0005524(ATP binding);GO:0005737(cytoplasm);GO:0005829(cytosol);GO:0006000(fructose metabolic process);GO:0006633(fatty acid biosynthetic process);GO:0008865(fructokinase activity);GO:0016051(carbohydrate biosynthetic process);GO:0016301(kinase activity);GO:0019252(starch biosynthetic process);GO:0046686(response to cadmium ion)	ko00051(Fructose and mannose metabolism);ko00500(Starch and sucrose metabolism);ko00520(Amino sugar and nucleotide sugar metabolism)	797	8	NA	4	NA	0	30.5633	0	5.326e-14	6.30988e-14	yes
PC-5p-400_9674	TRINITY_DN24162_c0_g1	glucose-6-phosphate isomerase 1, chloroplastic [Medicago truncatula]	PGI1	GO:0004347(glucose-6-phosphate isomerase activity);GO:0005829(cytosol);GO:0005982(starch metabolic process);GO:0006094(gluconeogenesis);GO:0006096(glycolytic process);GO:0009507(chloroplast);GO:0009536(plastid);GO:0009570(chloroplast stroma);GO:0009911(positive regulation of flower development);GO:0009941(chloroplast envelope)	ko00010(Glycolysis / Gluconeogenesis);ko00030(Pentose phosphate pathway);ko00500(Starch and sucrose metabolism);ko00520(Amino sugar and nucleotide sugar metabolism)	858	11.5	NA	4	NA	0	30.5633	0	5.326e-14	6.30988e-14	yes
PC-5p-400_9674	TRINITY_DN24273_c0_g1	putative G-patch domain-containing protein [Medicago truncatula]	MOS2	GO:0003676(nucleic acid binding);GO:0003723(RNA binding);GO:0005634(nucleus);GO:0009870(defense response signaling pathway, resistance gene-dependent);GO:0042742(defense response to bacterium)	NA	835	6.5	NA	4	2	0	30.5633	101.293	2.1117e-27	6.57705e-27	yes
PC-5p-400_9674	TRINITY_DN24284_c0_g1	probable glucan 1,3-beta-glucosidase A [Medicago truncatula]	exgA	GO:0004338(glucan exo-1,3-beta-glucosidase activity);GO:0005576(extracellular region);GO:0006073(cellular glucan metabolic process);GO:0009251(glucan catabolic process);GO:0009277(fungal-type cell wall);GO:0009986(cell surface);GO:0031505(fungal-type cell wall organization)	ko00500(Starch and sucrose metabolism)	1391	10	NA	NA	3	0	0	67.5288	4.6985e-30	1.53517e-29	yes
PC-5p-400_9674	TRINITY_DN24309_c1_g2	cullin-associated NEDD8-dissociated protein 1 isoform X1 [Medicago truncatula]	CAND1	GO:0005634(nucleus);GO:0010265(SCF complex assembly);GO:0016567(protein ubiquitination)	NA	1931	8	NA	NA	4	0	0	33.7644	2.1684e-15	3.13149e-15	yes
PC-5p-400_9674	TRINITY_DN24527_c0_g2	putative transcription factor bHLH family [Medicago truncatula]	PIF4	GO:0003677(DNA binding);GO:0003700(DNA binding transcription factor activity);GO:0005515(protein binding);GO:0005634(nucleus);GO:0006351(transcription, DNA-templated);GO:0006355(regulation of transcription, DNA-templated);GO:0009585(red, far-red light phototransduction);GO:0009704(de-etiolation);GO:0010017(red or far-red light signaling pathway);GO:0010161(red light signaling pathway);GO:0010244(…	ko04075(Plant hormone signal transduction)	1040	11	2	3	2	121.017	61.1266	135.058	4.6472e-07	4.874e-07	yes
PC-5p-400_9674	TRINITY_DN24620_c0_g1	UPF0051 protein ABCI8, chloroplastic [Medicago truncatula]	ABCI8	GO:0005215(transporter activity);GO:0005515(protein binding);GO:0006879(cellular iron ion homeostasis);GO:0009507(chloroplast);GO:0009570(chloroplast stroma);GO:0016226(iron-sulfur cluster assembly);GO:0042626(ATPase activity, coupled to transmembrane movement of substances);GO:2000030(regulation of response to red or far red light)	NA	519	9	3	2	2	201.694	794.645	540.23	8.542e-76	2.06568e-74	yes
PC-5p-400_9674	TRINITY_DN24862_c2_g1	hypothetical protein MtrunA17_Chr3g0121561 [Medicago truncatula]	UTP20	GO:0000462(maturation of SSU-rRNA from tricistronic rRNA transcript (SSU-rRNA, 5.8S rRNA, LSU-rRNA));GO:0005730(nucleolus);GO:0030686(90S preribosome);GO:0032040(small-subunit processome)	NA	5154	8	NA	NA	4	0	0	33.7644	2.1684e-15	3.13149e-15	yes
PC-5p-400_9674	TRINITY_DN24907_c0_g1	unknown [Medicago truncatula]	-	GO:0008150(biological_process);GO:0009507(chloroplast)	NA	1805	7	NA	4	NA	0	30.5633	0	5.326e-14	6.30988e-14	yes
PC-5p-400_9674	TRINITY_DN25000_c0_g1	ubiquinone biosynthesis monooxygenase COQ6, mitochondrial [Medicago truncatula]	COQ6	GO:0004497(monooxygenase activity);GO:0006744(ubiquinone biosynthetic process);GO:0044550(secondary metabolite biosynthetic process)	ko00130(Ubiquinone and other terpenoid-quinone biosynthesis)	1897	6	NA	2	4	0	61.1266	33.7644	1.3397e-13	1.5644e-13	yes
PC-5p-400_9674	TRINITY_DN25034_c1_g2	probable nucleolar protein 5-2 [Medicago truncatula]	NOP5-2	GO:0000154(rRNA modification);GO:0030515(snoRNA binding);GO:0031428(box C/D snoRNP complex);GO:0032040(small-subunit processome)	ko03008(Ribosome biogenesis in eukaryotes)	212	8.5	3	3	3	161.355	244.506	168.822	1.5889e-05	1.64883e-05	yes
PC-5p-400_9674	TRINITY_DN25128_c0_g1	bZIP transcription factor 17 [Medicago truncatula]	BZIP17	GO:0000139(Golgi membrane);GO:0003677(DNA binding);GO:0003700(DNA binding transcription factor activity);GO:0005515(protein binding);GO:0005634(nucleus);GO:0005783(endoplasmic reticulum);GO:0005789(endoplasmic reticulum membrane);GO:0006351(transcription, DNA-templated);GO:0006355(regulation of transcription, DNA-templated);GO:0016021(integral component of membrane);GO:0042538(hyperosmotic salini…	ko03013(RNA transport)	626	15	2	2	NA	121.017	183.38	0	6.0982e-38	3.37014e-37	yes
PC-5p-400_9674	TRINITY_DN25555_c0_g1	protein NETWORKED 4A isoform X1 [Medicago truncatula]	-	NA	NA	763	9	4	NA	2	40.3388	0	101.293	1.1933e-24	3.06672e-24	yes
PC-5p-400_9674	TRINITY_DN25655_c1_g1	enhancer of mRNA-decapping protein 4 [Medicago truncatula]	VCS	GO:0000166(nucleotide binding);GO:0000932(P-body);GO:0003729(mRNA binding);GO:0005515(protein binding);GO:0005634(nucleus);GO:0005829(cytosol);GO:0006397(mRNA processing);GO:0006402(mRNA catabolic process);GO:0009791(post-embryonic development);GO:0009965(leaf morphogenesis);GO:0010071(root meristem specification);GO:0010072(primary shoot apical meristem specification);GO:0031087(deadenylation-in…	ko03018(RNA degradation)	3555	8.5	NA	NA	2	0	0	67.5288	4.6985e-30	1.53517e-29	yes
PC-5p-400_9674	TRINITY_DN25693_c1_g1	putative xenobiotic-transporting ATPase [Medicago truncatula]	ABCC14	GO:0000325(plant-type vacuole);GO:0005524(ATP binding);GO:0005773(vacuole);GO:0005774(vacuolar membrane);GO:0005794(Golgi apparatus);GO:0005886(plasma membrane);GO:0008559(xenobiotic transmembrane transporting ATPase activity);GO:0016020(membrane);GO:0016021(integral component of membrane);GO:0042626(ATPase activity, coupled to transmembrane movement of substances);GO:0055085(transmembrane transp…	ko02010(ABC transporters)	2564	15	4	3	NA	40.3388	61.1266	0	3.9437e-13	4.56816e-13	yes
PC-5p-400_9674	TRINITY_DN25912_c0_g1	protein OBERON 4 [Medicago truncatula]	OBE4	GO:0001708(cell fate specification);GO:0005515(protein binding);GO:0005634(nucleus);GO:0009880(embryonic pattern specification);GO:0046872(metal ion binding);GO:0090421(embryonic meristem initiation)	NA	389	10	NA	2	2	0	61.1266	101.293	1.3456e-21	3.32027e-21	yes
PC-5p-400_9674	TRINITY_DN26033_c0_g5	uncharacterized protein LOC25489736 [Medicago truncatula]	-	GO:0003674(molecular_function);GO:0005634(nucleus);GO:0008150(biological_process)	NA	606	10	4	2	2	40.3388	91.6898	101.293	1.004e-06	1.0499e-06	yes
PC-5p-400_9674	TRINITY_DN26041_c0_g1	CRM-domain containing factor CFM2, chloroplastic [Medicago truncatula]	CFM2	GO:0000372(Group I intron splicing);GO:0000373(Group II intron splicing);GO:0003723(RNA binding);GO:0006397(mRNA processing);GO:0009507(chloroplast);GO:0009532(plastid stroma);GO:0009570(chloroplast stroma)	ko03018(RNA degradation)	2921	10	4	2	NA	40.3388	183.38	0	8.2509e-55	1.01488e-53	yes
PC-5p-400_9674	TRINITY_DN26193_c2_g2	auxin response factor 6 [Medicago truncatula]	ARF6	GO:0003677(DNA binding);GO:0003700(DNA binding transcription factor activity);GO:0005515(protein binding);GO:0005634(nucleus);GO:0006351(transcription, DNA-templated);GO:0006355(regulation of transcription, DNA-templated);GO:0009733(response to auxin);GO:0009734(auxin-activated signaling pathway);GO:0009908(flower development)	ko04075(Plant hormone signal transduction)	508	9	NA	2	NA	0	91.6898	0	1.508e-40	8.68797e-40	yes
PC-5p-48480_111	TRINITY_DN12499_c1_g3	-	-	NA	NA	211	9	2	2	NA	80.6777	61.1266	0	5.3091e-17	9.81985e-17	yes
PC-5p-48480_111	TRINITY_DN14544_c0_g1	transcription factor bHLH3 [Medicago truncatula]	BHLH3	GO:0003677(DNA binding);GO:0003700(DNA binding transcription factor activity);GO:0005515(protein binding);GO:0005634(nucleus);GO:0006351(transcription, DNA-templated);GO:0006355(regulation of transcription, DNA-templated);GO:0010629(negative regulation of gene expression);GO:0046983(protein dimerization activity)	ko04016(MAPK signaling pathway - plant);ko04075(Plant hormone signal transduction)	1585	9	NA	NA	4	0	0	33.7644	2.1684e-15	3.13149e-15	yes
PC-5p-48480_111	TRINITY_DN17412_c0_g1	-	-	NA	NA	227	16.5	NA	NA	2	0	0	67.5288	4.6985e-30	1.53517e-29	yes
PC-5p-48480_111	TRINITY_DN18145_c0_g1	transducin/WD-like repeat-protein [Medicago truncatula]	DCAF8	GO:0000166(nucleotide binding)	NA	793	9	4	NA	NA	40.3388	0	0	3.0257e-18	5.71521e-18	yes
PC-5p-48480_111	TRINITY_DN21107_c0_g3	uncharacterized protein LOC11421587 [Medicago truncatula]	-	GO:0003674(molecular_function);GO:0005634(nucleus);GO:0008150(biological_process)	NA	84	12.5	4	4	NA	40.3388	30.5633	0	7.2896e-09	7.93241e-09	yes
PC-5p-48480_111	TRINITY_DN21524_c0_g2	protein SRC2 [Medicago truncatula]	-	NA	NA	104	9.5	4	NA	NA	40.3388	0	0	3.0257e-18	5.71521e-18	yes
PC-5p-48480_111	TRINITY_DN22352_c0_g1	uncharacterized protein At2g17340 isoform X2 [Medicago truncatula]	At2g17340	GO:0004594(pantothenate kinase activity);GO:0005737(cytoplasm);GO:0016301(kinase activity);GO:0016310(phosphorylation)	ko00770(Pantothenate and CoA biosynthesis)	629	8	NA	3	NA	0	61.1266	0	2.8349e-27	7.6679e-27	yes
PC-5p-48480_111	TRINITY_DN23155_c0_g1	glycerophosphodiester phosphodiesterase GDPD1, chloroplastic [Medicago truncatula]	GDPD1	GO:0008889(glycerophosphodiester phosphodiesterase activity);GO:0030643(cellular phosphate ion homeostasis);GO:0046475(glycerophospholipid catabolic process)	ko00564(Glycerophospholipid metabolism)	104	14.5	NA	NA	2	0	0	101.293	1.0173e-44	7.03524e-44	yes
PC-5p-48480_111	TRINITY_DN24025_c1_g1	protein PHLOEM PROTEIN 2-LIKE A9 [Medicago truncatula]	PP2A9	GO:0003674(molecular_function);GO:0005634(nucleus);GO:0008150(biological_process)	NA	96	10	NA	NA	4	0	0	33.7644	2.1684e-15	3.13149e-15	yes
PC-5p-48480_111	TRINITY_DN25577_c0_g4	uncharacterized protein LOC11436549 isoform X2 [Medicago truncatula]	YMF17	GO:0005739(mitochondrion);GO:0005749(mitochondrial respiratory chain complex II, succinate dehydrogenase complex (ubiquinone));GO:0006099(tricarboxylic acid cycle);GO:0008177(succinate dehydrogenase (ubiquinone) activity);GO:0016020(membrane);GO:0016021(integral component of membrane);GO:0045273(respiratory chain complex II);GO:0046872(metal ion binding)	NA	208	9	2	NA	2	80.6777	0	67.5288	3.3721e-17	6.28407e-17	yes
PC-5p-48480_111	TRINITY_DN25948_c0_g1	UTP--glucose-1-phosphate uridylyltransferase 3, chloroplastic isoform X1 [Medicago truncatula]	UGP3	GO:0003977(UDP-N-acetylglucosamine diphosphorylase activity);GO:0005829(cytosol);GO:0006048(UDP-N-acetylglucosamine biosynthetic process);GO:0070569(uridylyltransferase activity)	NA	639	10.5	2	NA	NA	161.355	0	0	8.3268e-71	1.57284e-69	yes
PC-5p-48480_111	TRINITY_DN26011_c1_g2	protein NETWORKED 1D [Medicago truncatula]	NET1D	GO:0005886(plasma membrane);GO:0051015(actin filament binding)	NA	1680	7	NA	4	NA	0	30.5633	0	5.326e-14	6.30988e-14	yes
PC-5p-48480_111	TRINITY_DN26400_c0_g1	uncharacterized protein LOC25501589 [Medicago truncatula]	-	GO:0005096(GTPase activator activity);GO:0005737(cytoplasm);GO:0005886(plasma membrane);GO:0017137(Rab GTPase binding);GO:0017157(regulation of exocytosis);GO:0019905(syntaxin binding)	NA	1070	6.5	NA	4	NA	0	30.5633	0	5.326e-14	6.30988e-14	yes
PC-5p-57478_89	TRINITY_DN13679_c1_g1	transcription factor bHLH123 isoform X2 [Medicago truncatula]	BHLH123	GO:0001046(core promoter sequence-specific DNA binding);GO:0001228(transcriptional activator activity, RNA polymerase II transcription regulatory region sequence-specific DNA binding);GO:0005634(nucleus);GO:0006366(transcription by RNA polymerase II)	NA	1072	17	4	NA	NA	40.3388	0	0	3.0257e-18	5.71521e-18	yes
PC-5p-57478_89	TRINITY_DN13902_c0_g1	3'-N-debenzoyl-2'-deoxytaxol N-benzoyltransferase [Medicago truncatula]	SCT	GO:0005737(cytoplasm);GO:0016740(transferase activity);GO:0016747(transferase activity, transferring acyl groups other than amino-acyl groups)	NA	1494	10	4	NA	NA	40.3388	0	0	3.0257e-18	5.71521e-18	yes
PC-5p-57478_89	TRINITY_DN15042_c0_g1	glycoprotein 3-alpha-L-fucosyltransferase A [Medicago truncatula]	FUT12	GO:0005768(endosome);GO:0005794(Golgi apparatus);GO:0005802(trans-Golgi network);GO:0006486(protein glycosylation);GO:0008417(fucosyltransferase activity);GO:0016021(integral component of membrane);GO:0016757(transferase activity, transferring glycosyl groups);GO:0032580(Golgi cisterna membrane);GO:0071555(cell wall organization)	NA	649	10.5	2	NA	NA	161.355	0	0	8.3268e-71	1.57284e-69	yes
PC-5p-57478_89	TRINITY_DN15537_c0_g1	transmembrane protein, putative [Medicago truncatula]	-	GO:0003674(molecular_function);GO:0005747(mitochondrial respiratory chain complex I);GO:0008150(biological_process)	NA	80	9.5	NA	NA	4	0	0	33.7644	2.1684e-15	3.13149e-15	yes
PC-5p-57478_89	TRINITY_DN16752_c0_g5	ninja-family protein AFP3 [Medicago truncatula]	AFP-A1	GO:0005515(protein binding);GO:0005634(nucleus);GO:0007165(signal transduction)	ko04144(Endocytosis)	858	7.5	NA	NA	2	0	0	67.5288	4.6985e-30	1.53517e-29	yes
PC-5p-57478_89	TRINITY_DN17070_c0_g2	centromere/kinetochore protein zw10 homolog isoform X1 [Medicago truncatula]	ZW10	GO:0006888(ER to Golgi vesicle-mediated transport);GO:0007094(mitotic spindle assembly checkpoint);GO:1990423(RZZ complex)	NA	382	17	NA	NA	4	0	0	33.7644	2.1684e-15	3.13149e-15	yes
PC-5p-57478_89	TRINITY_DN17182_c0_g1	LOW QUALITY PROTEIN: tyrosine--tRNA ligase 2, cytoplasmic [Medicago truncatula]	At1g28350	GO:0004832(valine-tRNA ligase activity);GO:0005829(cytosol);GO:0006438(valyl-tRNA aminoacylation)	ko00970(Aminoacyl-tRNA biosynthesis)	176	13	NA	4	NA	0	30.5633	0	5.326e-14	6.30988e-14	yes
PC-5p-57478_89	TRINITY_DN18713_c0_g3	uncharacterized protein LOC112422700 [Medicago truncatula]	-	NA	NA	218	16	3	NA	NA	80.6777	0	0	9.1449e-36	4.07513e-35	yes
PC-5p-57478_89	TRINITY_DN18931_c0_g1	paired amphipathic helix protein Sin3-like 4 [Medicago truncatula]	SNL4	GO:0000118(histone deacetylase complex);GO:0000122(negative regulation of transcription by RNA polymerase II);GO:0000785(chromatin);GO:0004407(histone deacetylase activity);GO:0016575(histone deacetylation)	NA	860	9	NA	4	4	0	30.5633	33.7644	9.1976e-08	9.66516e-08	yes
PC-5p-57478_89	TRINITY_DN19819_c0_g4	hypothetical protein MTR_4g079510 [Medicago truncatula]	-	GO:0003674(molecular_function);GO:0005634(nucleus);GO:0008150(biological_process)	NA	971	9.5	NA	NA	2	0	0	202.586	0	0	yes
PC-5p-57478_89	TRINITY_DN19996_c0_g6	protein SHORT-ROOT [Medicago truncatula]	SHR	GO:0003700(DNA binding transcription factor activity);GO:0005634(nucleus);GO:0006355(regulation of transcription, DNA-templated);GO:0043565(sequence-specific DNA binding)	NA	42	4	NA	4	4	0	30.5633	33.7644	9.1976e-08	9.66516e-08	yes
PC-5p-57478_89	TRINITY_DN21167_c1_g2	pentatricopeptide repeat-containing protein At1g30610, chloroplastic [Medicago truncatula]	EMB2279	GO:0003723(RNA binding);GO:0004519(endonuclease activity);GO:0009451(RNA modification);GO:0009507(chloroplast);GO:0009793(embryo development ending in seed dormancy);GO:0010098(suspensor development);GO:0043231(intracellular membrane-bounded organelle)	NA	543	7.5	NA	2	NA	0	61.1266	0	2.8349e-27	7.6679e-27	yes
PC-5p-57478_89	TRINITY_DN21470_c0_g1	cinnamoyl-CoA reductase 1 isoform X3 [Medicago truncatula]	CCR1	GO:0004022(alcohol dehydrogenase (NAD) activity);GO:0050662(coenzyme binding);GO:0055114(oxidation-reduction process)	ko00940(Phenylpropanoid biosynthesis)	277	10	2	4	4	80.6777	30.5633	33.7644	8.4639e-08	9.13434e-08	yes
PC-5p-57478_89	TRINITY_DN21719_c0_g2	U-box domain-containing protein 62 isoform X1 [Medicago truncatula]	PUB62	GO:0004842(ubiquitin-protein transferase activity);GO:0005634(nucleus);GO:0016567(protein ubiquitination)	NA	87	8	NA	NA	4	0	0	33.7644	2.1684e-15	3.13149e-15	yes
PC-5p-57478_89	TRINITY_DN21951_c0_g2	phosphoribulokinase, chloroplastic [Medicago truncatula]	-	GO:0004849(uridine kinase activity);GO:0005829(cytosol);GO:0006206(pyrimidine nucleobase metabolic process);GO:0009507(chloroplast);GO:0043097(pyrimidine nucleoside salvage)	ko00710(Carbon fixation in photosynthetic organisms)	944	12	3	2	3	322.711	825.209	405.173	1.1112e-61	1.66315e-60	yes
PC-5p-57478_89	TRINITY_DN24497_c0_g1	diacylglycerol O-acyltransferase 3, cytosolic [Medicago truncatula]	-	GO:0003954(NADH dehydrogenase activity);GO:0009060(aerobic respiration);GO:0010181(FMN binding);GO:0051287(NAD binding);GO:0051539(4 iron, 4 sulfur cluster binding)	NA	1335	8	3	NA	4	80.6777	0	33.7644	2.0412e-19	4.72738e-19	yes
PC-5p-57478_89	TRINITY_DN26260_c0_g2	protein CROWDED NUCLEI 1 isoform X1 [Medicago truncatula]	CRWN1	GO:0005634(nucleus);GO:0005652(nuclear lamina);GO:0005829(cytosol);GO:0006997(nucleus organization);GO:0034399(nuclear periphery)	ko00270(Cysteine and methionine metabolism);ko00280(Valine, leucine and isoleucine degradation);ko00290(Valine, leucine and isoleucine biosynthesis);ko00770(Pantothenate and CoA biosynthesis)	670	6.5	NA	4	NA	0	30.5633	0	5.326e-14	6.30988e-14	yes
PC-5p-63740_78	TRINITY_DN13053_c0_g1	protein translation factor SUI1 homolog 1 [Medicago truncatula]	At4g27130	GO:0003743(translation initiation factor activity);GO:0006413(translational initiation)	ko03013(RNA transport)	384	7	3	3	3	121.017	61.1266	67.5288	2.2703e-06	2.36736e-06	yes
PC-5p-63740_78	TRINITY_DN16892_c0_g2	NADPH-dependent aldehyde reductase-like protein, chloroplastic [Medicago truncatula]	-	GO:0009507(chloroplast);GO:0016491(oxidoreductase activity);GO:0055114(oxidation-reduction process)	ko00061(Fatty acid biosynthesis);ko01040(Biosynthesis of unsaturated fatty acids);ko00780(Biotin metabolism);ko00333(Prodigiosin biosyntheses)	541	7	1	3	NA	282.372	61.1266	0	1.9028e-84	5.64398e-83	yes
PC-5p-63740_78	TRINITY_DN18194_c0_g1	zinc finger A20 and AN1 domain-containing stress-associated protein 3 isoform X1 [Medicago truncatula]	SAP3	GO:0003677(DNA binding);GO:0005634(nucleus);GO:0008150(biological_process);GO:0008270(zinc ion binding)	NA	314	9.5	2	2	2	363.05	1130.84	337.644	0	0	yes
PC-5p-63740_78	TRINITY_DN21417_c0_g2	heat shock cognate 70 kDa protein 2 [Medicago truncatula]	HSP70	GO:0005524(ATP binding);GO:0005618(cell wall);GO:0005634(nucleus);GO:0005739(mitochondrion);GO:0005774(vacuolar membrane);GO:0005794(Golgi apparatus);GO:0005829(cytosol);GO:0005886(plasma membrane);GO:0006351(transcription, DNA-templated);GO:0006355(regulation of transcription, DNA-templated);GO:0006457(protein folding);GO:0006986(response to unfolded protein);GO:0009266(response to temperature s…	ko03040(Spliceosome);ko04141(Protein processing in endoplasmic reticulum);ko04144(Endocytosis)	110	6	2	2	3	443.727	672.392	337.644	5.7335e-27	1.54567e-26	yes
PC-5p-63740_78	TRINITY_DN26284_c0_g1	putative receptor-like protein kinase At4g00960 isoform X1 [Medicago truncatula]	CRK31	GO:0004674(protein serine/threonine kinase activity);GO:0005886(plasma membrane);GO:0006468(protein phosphorylation);GO:0006952(defense response);GO:0009506(plasmodesma)	NA	893	5.5	NA	NA	4	0	0	33.7644	2.1684e-15	3.13149e-15	yes
PC-5p-69379_70	TRINITY_DN12946_c0_g2	thylakoid lumenal 15 kDa protein 1, chloroplastic isoform X1 [Medicago truncatula]	At2g44920	GO:0005515(protein binding);GO:0009507(chloroplast);GO:0009534(chloroplast thylakoid);GO:0009535(chloroplast thylakoid membrane);GO:0009543(chloroplast thylakoid lumen);GO:0009579(thylakoid);GO:0031977(thylakoid lumen)	NA	312	13.5	4	2	NA	40.3388	91.6898	0	1.4416e-21	3.51602e-21	yes
PC-5p-69379_70	TRINITY_DN13316_c0_g2	Heat shock cognate 70 kDa protein isoform A [Glycine soja]	HSP70-3	GO:0002020(protease binding);GO:0005515(protein binding);GO:0005524(ATP binding);GO:0005618(cell wall);GO:0005773(vacuole);GO:0005774(vacuolar membrane);GO:0005794(Golgi apparatus);GO:0005829(cytosol);GO:0005886(plasma membrane);GO:0006457(protein folding);GO:0009408(response to heat);GO:0009506(plasmodesma);GO:0009507(chloroplast);GO:0009615(response to virus);GO:0016363(nuclear matrix);GO:00226…	ko03040(Spliceosome);ko04141(Protein processing in endoplasmic reticulum);ko04144(Endocytosis)	108	13.5	NA	NA	4	0	0	33.7644	2.1684e-15	3.13149e-15	yes
PC-5p-69379_70	TRINITY_DN14696_c1_g1	uncharacterized protein LOC25502540 [Medicago truncatula]	-	GO:0009507(chloroplast)	NA	631	6.5	3	2	2	80.6777	275.07	236.351	5.0052e-24	1.28226e-23	yes
PC-5p-69379_70	TRINITY_DN15723_c0_g2	hypothetical protein TSUD_253520 [Trifolium subterraneum]	-	GO:0000462(maturation of SSU-rRNA from tricistronic rRNA transcript (SSU-rRNA, 5.8S rRNA, LSU-rRNA));GO:0005634(nucleus)	NA	992	10	NA	4	3	0	30.5633	67.5288	6.4851e-16	1.17172e-15	yes
PC-5p-69379_70	TRINITY_DN22477_c0_g1	hypothetical protein TSUD_336790 [Trifolium subterraneum]	AGD7	GO:0003677(DNA binding);GO:0005096(GTPase activator activity);GO:0005634(nucleus);GO:0005794(Golgi apparatus);GO:0005829(cytosol);GO:0016192(vesicle-mediated transport);GO:0046872(metal ion binding)	ko04144(Endocytosis)	819	14.5	NA	4	NA	0	30.5633	0	5.326e-14	6.30988e-14	yes
PC-5p-69379_70	TRINITY_DN22685_c1_g5	nuclear pore complex protein NUP1-like isoform X3 [Cicer arietinum]	-	NA	ko03013(RNA transport)	72	9	NA	NA	4	0	0	33.7644	2.1684e-15	3.13149e-15	yes
PC-5p-69379_70	TRINITY_DN22809_c1_g2	probable mitochondrial-processing peptidase subunit beta, mitochondrial [Medicago truncatula]	At3g02090	GO:0004222(metalloendopeptidase activity);GO:0005750(mitochondrial respiratory chain complex III);GO:0006122(mitochondrial electron transport, ubiquinol to cytochrome c);GO:0008270(zinc ion binding);GO:0009060(aerobic respiration);GO:0016485(protein processing)	NA	284	4.5	4	NA	NA	40.3388	0	0	3.0257e-18	5.71521e-18	yes
PC-5p-69379_70	TRINITY_DN22997_c0_g4	DNA ligase 1 [Medicago truncatula]	-	NA	NA	1090	11	NA	3	NA	0	61.1266	0	2.8349e-27	7.6679e-27	yes
PC-5p-69379_70	TRINITY_DN25724_c1_g1	putative transcription elongation factor SPT5 homolog 1 [Medicago truncatula]	At4g08350	GO:0004190(aspartic-type endopeptidase activity);GO:0006508(proteolysis);GO:0030163(protein catabolic process)	NA	3152	13	4	NA	NA	40.3388	0	0	3.0257e-18	5.71521e-18	yes
PC-5p-75796_62	TRINITY_DN25613_c2_g1	glycine dehydrogenase (decarboxylating), mitochondrial [Medicago truncatula]	GDCSP	GO:0005960(glycine cleavage complex)	ko00630(Glyoxylate and dicarboxylate metabolism);ko00260(Glycine, serine and threonine metabolism)	1177	10.5	4	4	4	40.3388	30.5633	33.7644	0.49068	0.491154	yes
PC-5p-81557_56	TRINITY_DN16628_c0_g1	phosphoglycerate mutase-like protein 1 isoform X1 [Medicago truncatula]	At5g64460	GO:0005829(cytosol);GO:0050278(sedoheptulose-bisphosphatase activity)	NA	430	8.5	0	NA	2	242.033	0	101.293	8.4218e-57	1.06701e-55	yes
PC-5p-81557_56	TRINITY_DN17613_c0_g2	serine/threonine protein phosphatase 2A 57 kDa regulatory subunit B' kappa isoform [Medicago truncatula]	B'IOTA	GO:0000159(protein phosphatase type 2A complex);GO:0005737(cytoplasm);GO:0007165(signal transduction);GO:0019888(protein phosphatase regulator activity)	ko03015(mRNA surveillance pathway)	1646	7.5	NA	NA	4	0	0	33.7644	2.1684e-15	3.13149e-15	yes
PC-5p-81557_56	TRINITY_DN17821_c0_g1	small nuclear ribonucleoprotein Sm D2 [Medicago truncatula]	SNRPD2	GO:0000387(spliceosomal snRNP assembly);GO:0005682(U5 snRNP);GO:0005685(U1 snRNP);GO:0005686(U2 snRNP);GO:0046540(U4/U6 x U5 tri-snRNP complex);GO:0071011(precatalytic spliceosome);GO:0071013(catalytic step 2 spliceosome)	ko03040(Spliceosome)	119	10.5	NA	2	NA	0	61.1266	0	2.8349e-27	7.6679e-27	yes
PC-5p-81557_56	TRINITY_DN18751_c1_g2	nodulin-related protein 1 [Medicago truncatula]	NRP1	GO:0003674(molecular_function);GO:0005575(cellular_component);GO:0009408(response to heat);GO:0009409(response to cold);GO:0009617(response to bacterium);GO:0009738(abscisic acid-activated signaling pathway)	NA	551	8.5	2	NA	3	121.017	0	101.293	1.9554e-25	5.10709e-25	yes
PC-5p-81557_56	TRINITY_DN20363_c1_g1	replication factor C subunit 2 [Medicago truncatula]	RFC2	GO:0003689(DNA clamp loader activity);GO:0005663(DNA replication factor C complex);GO:0006261(DNA-dependent DNA replication)	ko03030(DNA replication);ko03420(Nucleotide excision repair);ko03430(Mismatch repair)	509	10	NA	2	NA	0	61.1266	0	2.8349e-27	7.6679e-27	yes
PC-5p-81557_56	TRINITY_DN21724_c0_g1	flavin-containing monooxygenase FMO GS-OX5 [Medicago truncatula]	FMOGS-OX5	GO:0004497(monooxygenase activity);GO:0055114(oxidation-reduction process)	NA	271	8.5	NA	4	NA	0	30.5633	0	5.326e-14	6.30988e-14	yes
PC-5p-9773_636	TRINITY_DN12908_c0_g3	-	-	NA	NA	313	0.5	2	0	0	564.744	519.576	540.23	0.38881	0.391111	yes
PC-5p-9773_636	TRINITY_DN15155_c0_g1	cytochrome P450 84A1 [Medicago truncatula]	CYP84A1	GO:0009809(lignin biosynthetic process);GO:0016020(membrane);GO:0016709(oxidoreductase activity, acting on paired donors, with incorporation or reduction of molecular oxygen, NAD(P)H as one donor, and incorporation of one atom of oxygen)	ko00940(Phenylpropanoid biosynthesis)	1557	8.5	4	NA	NA	40.3388	0	0	3.0257e-18	5.71521e-18	yes
PC-5p-9773_636	TRINITY_DN16626_c0_g1	uncharacterized protein LOC11442060 [Medicago truncatula]	-	GO:0003674(molecular_function);GO:0005575(cellular_component);GO:0008150(biological_process)	NA	502	9.5	NA	2	2	0	244.506	135.058	3.1852e-52	2.9422e-51	yes
PC-5p-9773_636	TRINITY_DN17171_c0_g1	putative tRNA 4-demethylwyosine synthase (AdoMet-dependent) [Medicago truncatula]	TYW1	GO:0005739(mitochondrion);GO:0008033(tRNA processing);GO:0010181(FMN binding);GO:0016491(oxidoreductase activity);GO:0046872(metal ion binding);GO:0051539(4 iron, 4 sulfur cluster binding);GO:0055114(oxidation-reduction process);GO:0102521(tRNA-4-demethylwyosine synthase activity)	NA	1848	11.5	NA	4	NA	0	30.5633	0	5.326e-14	6.30988e-14	yes
PC-5p-9773_636	TRINITY_DN17721_c0_g2	vacuolar protein sorting-associated protein 27 isoform X2 [Medicago truncatula]	FAB1	GO:0005737(cytoplasm);GO:0008150(biological_process)	NA	479	10.5	NA	4	NA	0	30.5633	0	5.326e-14	6.30988e-14	yes
PC-5p-9773_636	TRINITY_DN17803_c0_g2	cytochrome P450 81E8-like [Medicago truncatula]	CYP81E8	GO:0016020(membrane);GO:0016709(oxidoreductase activity, acting on paired donors, with incorporation or reduction of molecular oxygen, NAD(P)H as one donor, and incorporation of one atom of oxygen);GO:0042343(indole glucosinolate metabolic process);GO:0044550(secondary metabolite biosynthetic process);GO:0098542(defense response to other organism)	ko00943(Isoflavonoid biosynthesis)	560	9	4	NA	NA	40.3388	0	0	3.0257e-18	5.71521e-18	yes
PC-5p-9773_636	TRINITY_DN17882_c0_g1	probable LRR receptor-like serine/threonine-protein kinase RKF3 [Medicago truncatula]	RKF3	GO:0004674(protein serine/threonine kinase activity);GO:0005886(plasma membrane)	NA	2064	10	NA	NA	4	0	0	33.7644	2.1684e-15	3.13149e-15	yes
PC-5p-9773_636	TRINITY_DN18490_c1_g2	VHS domain-containing protein At3g16270 [Medicago truncatula]	At3g16270	GO:0005634(nucleus);GO:0006886(intracellular protein transport);GO:0016020(membrane)	ko03013(RNA transport)	2244	6.5	NA	NA	2	0	0	67.5288	4.6985e-30	1.53517e-29	yes
PC-5p-9773_636	TRINITY_DN19159_c0_g3	transmembrane protein, putative [Medicago truncatula]	-	NA	NA	331	9	3	3	3	201.694	427.886	506.466	1.8836e-29	6.12278e-29	yes
PC-5p-9773_636	TRINITY_DN19247_c1_g1	4-coumarate--CoA ligase-like 5 [Medicago truncatula]	4CLL5	GO:0005524(ATP binding);GO:0005777(peroxisome);GO:0008152(metabolic process);GO:0009507(chloroplast);GO:0009611(response to wounding);GO:0009695(jasmonic acid biosynthetic process);GO:0009698(phenylpropanoid metabolic process);GO:0016021(integral component of membrane);GO:0016207(4-coumarate-CoA ligase activity);GO:0016874(ligase activity)	ko00592(alpha-Linolenic acid metabolism)	1103	7.5	NA	NA	4	0	0	33.7644	2.1684e-15	3.13149e-15	yes
PC-5p-9773_636	TRINITY_DN19322_c0_g2	calcium-binding allergen Bet v 3 [Medicago truncatula]	BETVIII	GO:0005509(calcium ion binding)	ko04626(Plant-pathogen interaction)	1020	14.5	NA	2	NA	0	91.6898	0	1.508e-40	8.68797e-40	yes
PC-5p-9773_636	TRINITY_DN19839_c0_g2	photosystem I reaction center subunit N, chloroplastic [Medicago truncatula]	PSAN	GO:0005516(calmodulin binding);GO:0009507(chloroplast);GO:0009522(photosystem I);GO:0009534(chloroplast thylakoid);GO:0009535(chloroplast thylakoid membrane);GO:0009543(chloroplast thylakoid lumen);GO:0009579(thylakoid);GO:0009773(photosynthetic electron transport in photosystem I);GO:0015979(photosynthesis);GO:0030093(chloroplast photosystem I)	ko00195(Photosynthesis)	205	9.5	3	2	3	121.017	213.943	101.293	1.5488e-11	1.77206e-11	yes
PC-5p-9773_636	TRINITY_DN21110_c0_g3	mitogen-activated protein kinase kinase kinase 3 [Medicago truncatula]	-	GO:0005737(cytoplasm)	NA	513	9	NA	NA	2	0	0	67.5288	4.6985e-30	1.53517e-29	yes
PC-5p-9773_636	TRINITY_DN21123_c0_g6	albumin I [Medicago truncatula]	LEG1	NA	NA	168	3	0	1	NA	403.388	183.38	0	0	0	yes
PC-5p-9773_636	TRINITY_DN22531_c0_g1	PREDICTED: eukaryotic translation initiation factor 5-like [Vigna angularis]	EIF5	GO:0003743(translation initiation factor activity);GO:0005525(GTP binding);GO:0005634(nucleus);GO:0005737(cytoplasm);GO:0006413(translational initiation);GO:0006446(regulation of translational initiation)	ko03013(RNA transport)	1546	7.5	NA	NA	3	0	0	168.822	4.758e-74	1.04621e-72	yes
PC-5p-9773_636	TRINITY_DN22635_c0_g1	uncharacterized protein LOC11445394 [Medicago truncatula]	-	GO:0009507(chloroplast)	NA	606	14.5	2	2	NA	80.6777	61.1266	0	5.3091e-17	9.81985e-17	yes
PC-5p-9773_636	TRINITY_DN22762_c0_g6	protein transport protein SEC23 [Medicago truncatula]	SEC23	GO:0005215(transporter activity);GO:0005737(cytoplasm);GO:0005829(cytosol);GO:0006810(transport);GO:0006886(intracellular protein transport);GO:0008270(zinc ion binding);GO:0030127(COPII vesicle coat);GO:0090114(COPII-coated vesicle budding)	ko04141(Protein processing in endoplasmic reticulum)	1839	6	NA	4	NA	0	30.5633	0	5.326e-14	6.30988e-14	yes
PC-5p-9773_636	TRINITY_DN23029_c0_g1	uncharacterized protein LOC11442389 isoform X2 [Medicago truncatula]	BST1	GO:0005783(endoplasmic reticulum);GO:0005794(Golgi apparatus);GO:0006505(GPI anchor metabolic process);GO:0006886(intracellular protein transport);GO:0016788(hydrolase activity, acting on ester bonds)	ko00563(Glycosylphosphatidylinositol(GPI)-anchor biosynthesis)	3482	9.5	4	NA	NA	40.3388	0	0	3.0257e-18	5.71521e-18	yes
PC-5p-9773_636	TRINITY_DN23091_c0_g3	deoxyhypusine hydroxylase [Medicago truncatula]	Os12g0626100	GO:0008612(peptidyl-lysine modification to peptidyl-hypusine);GO:0019135(deoxyhypusine monooxygenase activity)	NA	936	7.5	2	NA	2	80.6777	0	67.5288	3.3721e-17	6.28407e-17	yes
PC-5p-9773_636	TRINITY_DN24177_c0_g3	putative phosphoenolpyruvate carboxylase [Medicago truncatula]	-	GO:0005829(cytosol);GO:0008964(phosphoenolpyruvate carboxylase activity)	ko00620(Pyruvate metabolism);ko00710(Carbon fixation in photosynthetic organisms)	451	11	4	NA	NA	40.3388	0	0	3.0257e-18	5.71521e-18	yes
PC-5p-9773_636	TRINITY_DN24518_c0_g1	indole-3-acetaldehyde oxidase [Medicago truncatula]	AAO1	GO:0004854(xanthine dehydrogenase activity);GO:0005829(cytosol);GO:0009115(xanthine catabolic process);GO:0016903(oxidoreductase activity, acting on the aldehyde or oxo group of donors);GO:0050660(flavin adenine dinucleotide binding)	ko00906(Carotenoid biosynthesis)	1402	7.5	NA	4	NA	0	30.5633	0	5.326e-14	6.30988e-14	yes
PC-5p-9773_636	TRINITY_DN24578_c0_g1	chlorophyllide a oxygenase, chloroplastic [Medicago truncatula]	CAO	GO:0005506(iron ion binding);GO:0009507(chloroplast);GO:0009535(chloroplast thylakoid membrane);GO:0009706(chloroplast inner membrane);GO:0010277(chlorophyllide a oxygenase [overall] activity);GO:0015995(chlorophyll biosynthetic process);GO:0016705(oxidoreductase activity, acting on paired donors, with incorporation or reduction of molecular oxygen);GO:0042651(thylakoid membrane);GO:0051537(2 iro…	ko00860(Porphyrin and chlorophyll metabolism)	371	6	NA	NA	4	0	0	33.7644	2.1684e-15	3.13149e-15	yes
PC-5p-9773_636	TRINITY_DN24607_c1_g2	uncharacterized protein LOC25487276 isoform X2 [Medicago truncatula]	-	NA	NA	1233	3	NA	4	NA	0	30.5633	0	5.326e-14	6.30988e-14	yes
PC-5p-9773_636	TRINITY_DN24877_c0_g4	3-oxoacyl-[acyl-carrier-protein] synthase II, chloroplastic [Medicago truncatula]	-	NA	ko00061(Fatty acid biosynthesis);ko00780(Biotin metabolism)	331	7	NA	NA	4	0	0	33.7644	2.1684e-15	3.13149e-15	yes
PC-5p-9773_636	TRINITY_DN25020_c0_g2	protein NRT1/ PTR FAMILY 6.3 [Medicago truncatula]	NPF6.3	GO:0005215(transporter activity);GO:0005515(protein binding);GO:0005886(plasma membrane);GO:0006857(oligopeptide transport);GO:0009414(response to water deprivation);GO:0009635(response to herbicide);GO:0009734(auxin-activated signaling pathway);GO:0010167(response to nitrate);GO:0015112(nitrate transmembrane transporter activity);GO:0015293(symporter activity);GO:0015706(nitrate transport);GO:00…	NA	694	8	4	NA	4	40.3388	0	33.7644	5.8097e-09	6.43576e-09	yes
PC-5p-9773_636	TRINITY_DN25114_c0_g2	receptor protein kinase TMK1 [Medicago truncatula]	TMK1	GO:0004675(transmembrane receptor protein serine/threonine kinase activity);GO:0005515(protein binding);GO:0005524(ATP binding);GO:0005576(extracellular region);GO:0005886(plasma membrane);GO:0006468(protein phosphorylation);GO:0007165(signal transduction);GO:0016021(integral component of membrane)	NA	915	7.5	NA	4	NA	0	30.5633	0	5.326e-14	6.30988e-14	yes
PC-5p-9773_636	TRINITY_DN25196_c0_g1	uncharacterized protein LOC25500873 [Medicago truncatula]	-	GO:0003674(molecular_function);GO:0005634(nucleus);GO:0008150(biological_process)	NA	1837	7	NA	4	2	0	30.5633	101.293	2.1117e-27	6.57705e-27	yes
PC-5p-9773_636	TRINITY_DN25278_c0_g3	uncharacterized serine-rich protein C215.13 [Medicago truncatula]	-	GO:0003674(molecular_function);GO:0005634(nucleus);GO:0008150(biological_process)	NA	942	8	4	NA	NA	40.3388	0	0	3.0257e-18	5.71521e-18	yes
PC-5p-9773_636	TRINITY_DN25306_c0_g1	hypothetical protein MTR_2g078660 [Medicago truncatula]	-	NA	NA	369	10	4	NA	2	40.3388	0	101.293	1.1933e-24	3.06672e-24	yes
PC-5p-9773_636	TRINITY_DN25525_c0_g1	cryptochrome-1 [Medicago truncatula]	CRY2	GO:0005515(protein binding);GO:0005524(ATP binding);GO:0005634(nucleus);GO:0005737(cytoplasm);GO:0005773(vacuole);GO:0006325(chromatin organization);GO:0006338(chromatin remodeling);GO:0007623(circadian rhythm);GO:0009414(response to water deprivation);GO:0009416(response to light stimulus);GO:0009637(response to blue light);GO:0009638(phototropism);GO:0009646(response to absence of light);GO:000…	ko04712(Circadian rhythm - plant)	1893	8	NA	4	NA	0	30.5633	0	5.326e-14	6.30988e-14	yes
PC-5p-9773_636	TRINITY_DN25531_c0_g1	GYF domain-containing protein [Trifolium pratense]	GIGYF2	GO:0003729(mRNA binding);GO:0009507(chloroplast);GO:0009737(response to abscisic acid);GO:0051607(defense response to virus)	NA	1126	15	NA	NA	4	0	0	33.7644	2.1684e-15	3.13149e-15	yes
PC-5p-9773_636	TRINITY_DN25843_c1_g2	putative transcription factor WD40-like family [Medicago truncatula]	Dmxl1	GO:0007035(vacuolar acidification);GO:0008593(regulation of Notch signaling pathway);GO:0035149(lumen formation, open tracheal system);GO:0043291(RAVE complex);GO:0070072(vacuolar proton-transporting V-type ATPase complex assembly)	NA	6685	11	NA	4	NA	0	30.5633	0	5.326e-14	6.30988e-14	yes
PC-5p-9773_636	TRINITY_DN25988_c1_g1	transcription factor MYC2 [Medicago truncatula]	MYC2	GO:0003677(DNA binding);GO:0003700(DNA binding transcription factor activity);GO:0005515(protein binding);GO:0005634(nucleus);GO:0006351(transcription, DNA-templated);GO:0009269(response to desiccation);GO:0009611(response to wounding);GO:0009737(response to abscisic acid);GO:0009738(abscisic acid-activated signaling pathway);GO:0009753(response to jasmonic acid);GO:0009867(jasmonic acid mediated…	ko04016(MAPK signaling pathway - plant);ko04075(Plant hormone signal transduction)	1008	9	NA	3	NA	0	152.816	0	4.2589e-67	7.03027e-66	yes
PC-5p-9773_636	TRINITY_DN26132_c1_g3	-	-	NA	NA	140	11	NA	4	4	0	30.5633	33.7644	9.1976e-08	9.66516e-08	yes
PC-5p-9773_636	TRINITY_DN26291_c1_g1	LOW QUALITY PROTEIN: probable pre-mRNA-splicing factor ATP-dependent RNA helicase DEAH5 [Medicago truncatula]	At3g26560	GO:0000398(mRNA splicing, via spliceosome);GO:0004004(ATP-dependent RNA helicase activity);GO:0005681(spliceosomal complex);GO:0005737(cytoplasm)	ko03040(Spliceosome)	236	6.5	2	NA	NA	80.6777	0	0	9.1449e-36	4.07513e-35	yes
PC-5p-9773_636	TRINITY_DN26316_c1_g1	-	-	NA	NA	189	7.5	NA	NA	3	0	0	67.5288	4.6985e-30	1.53517e-29	yes
aly-miR156e-3p_L+1	TRINITY_DN11623_c0_g1	-	-	NA	NA	669	12	3	4	3	80.6777	30.5633	67.5288	1.2003e-05	1.24569e-05	yes
aly-miR156e-3p_L+1	TRINITY_DN13432_c1_g3	AAA domain protein [Medicago truncatula]	-	GO:0003690(double-stranded DNA binding);GO:0046403(polynucleotide 3'-phosphatase activity);GO:0046404(ATP-dependent polydeoxyribonucleotide 5'-hydroxyl-kinase activity);GO:0098504(DNA 3' dephosphorylation involved in DNA repair);GO:0098506(polynucleotide 3' dephosphorylation)	NA	490	13.5	NA	4	NA	0	30.5633	0	5.326e-14	6.30988e-14	yes
aly-miR156e-3p_L+1	TRINITY_DN13786_c1_g7	polygalacturonase inhibitor 2 [Medicago truncatula]	PGIP1	NA	NA	509	15	NA	NA	2	0	0	202.586	0	0	yes
aly-miR156e-3p_L+1	TRINITY_DN13812_c0_g1	ABC transporter B family member 2 [Medicago truncatula]	ABCB2	GO:0016021(integral component of membrane);GO:0042626(ATPase activity, coupled to transmembrane movement of substances);GO:0055085(transmembrane transport)	ko02010(ABC transporters)	124	12.5	NA	NA	4	0	0	33.7644	2.1684e-15	3.13149e-15	yes
aly-miR156e-3p_L+1	TRINITY_DN13848_c0_g4	F-box/RNI/FBD-like domain protein [Medicago truncatula]	At5g53640	GO:0005634(nucleus);GO:0008150(biological_process)	NA	1445	7	4	NA	NA	40.3388	0	0	3.0257e-18	5.71521e-18	yes
aly-miR156e-3p_L+1	TRINITY_DN14086_c1_g2	putative acyl-activating enzyme chloroplastic-like [Trifolium pratense]	AAE16	GO:0006631(fatty acid metabolic process);GO:0009507(chloroplast);GO:0009941(chloroplast envelope);GO:0016874(ligase activity)	ko00061(Fatty acid biosynthesis);ko00071(Fatty acid degradation);ko04146(Peroxisome)	308	8	NA	4	4	0	30.5633	33.7644	9.1976e-08	9.66516e-08	yes
aly-miR156e-3p_L+1	TRINITY_DN15971_c0_g2	uncharacterized protein LOC11419069 isoform X2 [Medicago truncatula]	-	GO:0008150(biological_process);GO:0009507(chloroplast)	NA	956	5.5	2	NA	2	201.694	0	236.351	3.465e-49	3.0761e-48	yes
aly-miR156e-3p_L+1	TRINITY_DN17097_c2_g5	UPF0587 protein C1orf123 homolog [Medicago truncatula]	-	GO:0003674(molecular_function);GO:0008150(biological_process);GO:0070062(extracellular exosome)	NA	66	9	NA	NA	2	0	0	67.5288	4.6985e-30	1.53517e-29	yes
aly-miR156e-3p_L+1	TRINITY_DN17139_c1_g1	putative splicing factor, RBM39, splicing factor RBM39, linker [Medicago truncatula]	-	GO:0005634(nucleus);GO:0009416(response to light stimulus);GO:0009909(regulation of flower development)	NA	478	6.5	3	4	2	80.6777	30.5633	135.058	3.5542e-15	5.12175e-15	yes
aly-miR156e-3p_L+1	TRINITY_DN17561_c0_g4	uncharacterized protein LOC11415815 [Medicago truncatula]	-	GO:0005886(plasma membrane)	NA	835	8	2	NA	NA	121.017	0	0	2.761e-53	2.58192e-52	yes
aly-miR156e-3p_L+1	TRINITY_DN17595_c0_g1	histone-lysine N-methyltransferase ATXR3 [Medicago truncatula]	ATXR3	GO:0005634(nucleus);GO:0009791(post-embryonic development);GO:0010228(vegetative to reproductive phase transition of meristem);GO:0042800(histone methyltransferase activity (H3-K4 specific));GO:0048440(carpel development);GO:0048443(stamen development)	NA	481	7.5	NA	NA	2	0	0	67.5288	4.6985e-30	1.53517e-29	yes
aly-miR156e-3p_L+1	TRINITY_DN18158_c0_g1	-	-	NA	NA	274	8	NA	4	NA	0	30.5633	0	5.326e-14	6.30988e-14	yes
aly-miR156e-3p_L+1	TRINITY_DN18614_c0_g1	40S ribosomal protein S8 [Medicago truncatula]	RPS8	GO:0000462(maturation of SSU-rRNA from tricistronic rRNA transcript (SSU-rRNA, 5.8S rRNA, LSU-rRNA));GO:0003735(structural constituent of ribosome);GO:0022627(cytosolic small ribosomal subunit)	ko03010(Ribosome)	14	5	3	3	3	121.017	91.6898	67.5288	0.00046136	0.000473243	yes
aly-miR156e-3p_L+1	TRINITY_DN20034_c0_g1	formin-like protein 1 [Medicago truncatula]	FH1	GO:0003779(actin binding);GO:0005515(protein binding);GO:0005618(cell wall);GO:0005634(nucleus);GO:0005886(plasma membrane);GO:0016020(membrane);GO:0016021(integral component of membrane);GO:0030036(actin cytoskeleton organization);GO:0045010(actin nucleation);GO:0051015(actin filament binding);GO:0051016(barbed-end actin filament capping)	NA	1555	6	4	NA	4	40.3388	0	33.7644	5.8097e-09	6.43576e-09	yes
aly-miR156e-3p_L+1	TRINITY_DN20423_c0_g2	scarecrow-like protein 15 [Medicago truncatula]	SCL15	GO:0003700(DNA binding transcription factor activity);GO:0005634(nucleus);GO:0006355(regulation of transcription, DNA-templated);GO:0030154(cell differentiation);GO:0043565(sequence-specific DNA binding);GO:0048831(regulation of shoot system development)	ko04075(Plant hormone signal transduction)	1743	6	NA	NA	4	0	0	33.7644	2.1684e-15	3.13149e-15	yes
aly-miR156e-3p_L+1	TRINITY_DN21131_c0_g1	phospholipase D beta 2 [Medicago truncatula]	PLDBETA1	GO:0003824(catalytic activity);GO:0004630(phospholipase D activity);GO:0005515(protein binding);GO:0005546(phosphatidylinositol-4,5-bisphosphate binding);GO:0005634(nucleus);GO:0005737(cytoplasm);GO:0009506(plasmodesma);GO:0009816(defense response to bacterium, incompatible interaction);GO:0016020(membrane);GO:0016042(lipid catabolic process);GO:0046686(response to cadmium ion);GO:0070290(N-acylp…	ko00564(Glycerophospholipid metabolism);ko00565(Ether lipid metabolism);ko04144(Endocytosis)	3106	8	NA	NA	4	0	0	33.7644	2.1684e-15	3.13149e-15	yes
aly-miR156e-3p_L+1	TRINITY_DN21815_c0_g1	acyl-CoA-binding domain-containing protein 3 [Medicago truncatula]	ACBP3	GO:0000062(fatty-acyl-CoA binding);GO:0001666(response to hypoxia);GO:0005576(extracellular region);GO:0005615(extracellular space);GO:0006952(defense response);GO:0008289(lipid binding);GO:0009617(response to bacterium);GO:0009646(response to absence of light);GO:0015908(fatty acid transport);GO:0042742(defense response to bacterium);GO:0050832(defense response to fungus)	NA	668	7.5	3	4	NA	80.6777	30.5633	0	3.6961e-20	8.81092e-20	yes
aly-miR156e-3p_L+1	TRINITY_DN22017_c0_g1	protein argonaute 2 [Medicago truncatula]	AGO2	GO:0003729(mRNA binding);GO:0005515(protein binding);GO:0005634(nucleus);GO:0005737(cytoplasm);GO:0005829(cytosol);GO:0006351(transcription, DNA-templated);GO:0006355(regulation of transcription, DNA-templated);GO:0006417(regulation of translation);GO:0019048(modulation by virus of host morphology or physiology);GO:0031047(gene silencing by RNA);GO:0035197(siRNA binding);GO:0042742(defense respon…	NA	230	10.5	2	2	NA	161.355	122.253	0	2.8086e-33	1.16965e-32	yes
aly-miR156e-3p_L+1	TRINITY_DN22138_c0_g2	RNA-binding protein 39 [Medicago truncatula]	RBM39	GO:0003676(nucleic acid binding);GO:0005634(nucleus);GO:0006397(mRNA processing)	NA	361	11	3	2	3	80.6777	152.816	67.5288	7.4679e-10	8.47627e-10	yes
aly-miR156e-3p_L+1	TRINITY_DN22163_c0_g2	chromatin assembly factor 1 subunit FAS1 [Cicer arietinum]	FAS1	GO:0005634(nucleus);GO:0006334(nucleosome assembly);GO:0033186(CAF-1 complex)	NA	445	8	4	NA	NA	40.3388	0	0	3.0257e-18	5.71521e-18	yes
aly-miR156e-3p_L+1	TRINITY_DN22200_c1_g2	uncharacterized protein C12G12.07c [Medicago truncatula]	-	GO:0004004(ATP-dependent RNA helicase activity);GO:0010501(RNA secondary structure unwinding)	NA	1230	10.5	NA	3	NA	0	61.1266	0	2.8349e-27	7.6679e-27	yes
aly-miR156e-3p_L+1	TRINITY_DN22708_c0_g1	uncharacterized protein LOC11438626 [Medicago truncatula]	-	GO:0005634(nucleus);GO:0008168(methyltransferase activity);GO:0032259(methylation)	NA	50	9.5	NA	3	NA	0	61.1266	0	2.8349e-27	7.6679e-27	yes
aly-miR156e-3p_L+1	TRINITY_DN22868_c0_g1	trafficking protein particle complex subunit 13 [Medicago truncatula]	trappc13	GO:0003674(molecular_function);GO:0008150(biological_process);GO:0009507(chloroplast)	NA	1120	7	NA	NA	4	0	0	33.7644	2.1684e-15	3.13149e-15	yes
aly-miR156e-3p_L+1	TRINITY_DN22888_c0_g1	golgin candidate 1 [Medicago truncatula]	GC1	GO:0000139(Golgi membrane);GO:0000301(retrograde transport, vesicle recycling within Golgi);GO:0007030(Golgi organization);GO:0031985(Golgi cisterna)	NA	1266	8.5	NA	4	NA	0	30.5633	0	5.326e-14	6.30988e-14	yes
aly-miR156e-3p_L+1	TRINITY_DN23022_c0_g1	putative F-box domain, leucine-rich repeat domain, L domain-containing protein [Medicago truncatula]	Fbxl4	GO:0004842(ubiquitin-protein transferase activity);GO:0005634(nucleus);GO:0005737(cytoplasm);GO:0005739(mitochondrion);GO:0005758(mitochondrial intermembrane space);GO:0008150(biological_process);GO:0016607(nuclear speck)	NA	505	10	NA	2	NA	0	122.253	0	8.0164e-54	8.78795e-53	yes
aly-miR156e-3p_L+1	TRINITY_DN23125_c0_g1	protein NUCLEAR FUSION DEFECTIVE 4 [Medicago truncatula]	NFD4	GO:0009507(chloroplast);GO:0016021(integral component of membrane)	NA	1038	11	4	4	NA	40.3388	30.5633	0	7.2896e-09	7.93241e-09	yes
aly-miR156e-3p_L+1	TRINITY_DN23558_c2_g1	MLO-like protein 1 [Medicago truncatula]	MLO1	GO:0005886(plasma membrane);GO:0006952(defense response)	NA	13	8	4	NA	NA	40.3388	0	0	3.0257e-18	5.71521e-18	yes
aly-miR156e-3p_L+1	TRINITY_DN23850_c0_g1	hypothetical protein TSUD_227820 [Trifolium subterraneum]	-	NA	NA	227	10	NA	NA	3	0	0	67.5288	4.6985e-30	1.53517e-29	yes
aly-miR156e-3p_L+1	TRINITY_DN24101_c0_g1	receptor-like serine/threonine-protein kinase At2g45590 [Medicago truncatula]	At2g45590	GO:0004674(protein serine/threonine kinase activity);GO:0005886(plasma membrane)	NA	1532	12	NA	NA	4	0	0	33.7644	2.1684e-15	3.13149e-15	yes
aly-miR156e-3p_L+1	TRINITY_DN24525_c0_g2	uncharacterized protein LOC11433194 [Medicago truncatula]	-	GO:0003674(molecular_function);GO:0005634(nucleus);GO:0008150(biological_process)	NA	757	7	NA	2	NA	0	91.6898	0	1.508e-40	8.68797e-40	yes
aly-miR156e-3p_L+1	TRINITY_DN25328_c1_g1	PREDICTED: transcription factor MYB48 isoform X1 [Eucalyptus grandis]	MYB48	GO:0000981(RNA polymerase II transcription factor activity, sequence-specific DNA binding);GO:0001135(transcription factor activity, RNA polymerase II transcription factor recruiting);GO:0003677(DNA binding);GO:0003700(DNA binding transcription factor activity);GO:0005634(nucleus);GO:0006351(transcription, DNA-templated);GO:0006355(regulation of transcription, DNA-templated);GO:0006357(regulation…	NA	326	7	4	4	NA	40.3388	30.5633	0	7.2896e-09	7.93241e-09	yes
aly-miR156e-3p_L+1	TRINITY_DN25755_c0_g1	rubisco accumulation factor 1.1, chloroplastic [Medicago truncatula]	RAF1.1	GO:0003674(molecular_function);GO:0009507(chloroplast);GO:0009570(chloroplast stroma)	ko02010(ABC transporters)	1124	9	3	2	3	121.017	183.38	135.058	0.00067075	0.000687345	yes
aly-miR156e-3p_L+1	TRINITY_DN25888_c1_g2	uncharacterized protein LOC25500178 isoform X1 [Medicago truncatula]	-	GO:0003700(DNA binding transcription factor activity);GO:0005634(nucleus);GO:0043565(sequence-specific DNA binding);GO:0044212(transcription regulatory region DNA binding)	NA	5983	7	4	NA	NA	40.3388	0	0	3.0257e-18	5.71521e-18	yes
aly-miR156e-3p_L+1	TRINITY_DN25972_c0_g1	putative Heat shock protein 70 family [Medicago truncatula]	BIP4	GO:0005783(endoplasmic reticulum)	ko03060(Protein export);ko04141(Protein processing in endoplasmic reticulum)	804	6.5	2	NA	3	282.372	0	67.5288	1.0782e-81	2.97353e-80	yes
aly-miR156e-3p_L+1	TRINITY_DN26029_c1_g1	U1 small nuclear ribonucleoprotein 70 kDa [Cicer arietinum]	RNU1	GO:0000243(commitment complex);GO:0000398(mRNA splicing, via spliceosome);GO:0003729(mRNA binding);GO:0005685(U1 snRNP);GO:0030619(U1 snRNA binding);GO:0071004(U2-type prespliceosome);GO:0071011(precatalytic spliceosome)	ko03040(Spliceosome)	1910	13	2	3	2	363.05	122.253	202.586	3.347e-29	1.08704e-28	yes
aly-miR156e-3p_L+1	TRINITY_DN26041_c0_g1	CRM-domain containing factor CFM2, chloroplastic [Medicago truncatula]	CFM2	GO:0000372(Group I intron splicing);GO:0000373(Group II intron splicing);GO:0003723(RNA binding);GO:0006397(mRNA processing);GO:0009507(chloroplast);GO:0009532(plastid stroma);GO:0009570(chloroplast stroma)	ko03018(RNA degradation)	1943	13.5	2	2	NA	161.355	91.6898	0	1.8878e-34	8.18502e-34	yes
aly-miR156e-3p_L+1	TRINITY_DN26153_c1_g1	-	-	NA	NA	69	9	NA	4	4	0	30.5633	33.7644	9.1976e-08	9.66516e-08	yes
aly-miR167a-5p_R+2	TRINITY_DN15012_c2_g3	endoribonuclease YBEY, chloroplastic isoform X1 [Medicago truncatula]	yidA	GO:0005737(cytoplasm);GO:0016791(phosphatase activity);GO:0044283(small molecule biosynthetic process)	NA	623	7	NA	4	NA	0	30.5633	0	5.326e-14	6.30988e-14	yes
aly-miR167a-5p_R+2	TRINITY_DN20240_c0_g1	triacylglycerol lipase SDP1 isoform X2 [Medicago truncatula]	SDP1	GO:0016787(hydrolase activity)	ko00100(Steroid biosynthesis);ko00561(Glycerolipid metabolism);ko00564(Glycerophospholipid metabolism);ko00565(Ether lipid metabolism);ko00590(Arachidonic acid metabolism);ko00591(Linoleic acid metabolism);ko00592(alpha-Linolenic acid metabolism)	2442	14	NA	NA	2	0	0	67.5288	4.6985e-30	1.53517e-29	yes
aly-miR167a-5p_R+2	TRINITY_DN22539_c0_g1	potassium channel SKOR isoform X1 [Medicago truncatula]	SKOR	GO:0005249(voltage-gated potassium channel activity);GO:0005887(integral component of plasma membrane);GO:0042391(regulation of membrane potential)	NA	2562	8	NA	NA	4	0	0	33.7644	2.1684e-15	3.13149e-15	yes
aly-miR167a-5p_R+2	TRINITY_DN24487_c1_g1	sulfoquinovosyl transferase SQD2 [Medicago truncatula]	SQD2	GO:0005886(plasma membrane);GO:0008194(UDP-glycosyltransferase activity);GO:0009247(glycolipid biosynthetic process);GO:0009507(chloroplast);GO:0009536(plastid);GO:0009941(chloroplast envelope);GO:0016021(integral component of membrane);GO:0016036(cellular response to phosphate starvation);GO:0016757(transferase activity, transferring glycosyl groups);GO:0031969(chloroplast membrane);GO:0046506(s…	ko00561(Glycerolipid metabolism)	1162	8.5	2	2	2	121.017	122.253	135.058	0.6192	0.619363	yes
aly-miR2111a-5p_1ss19TG	TRINITY_DN13129_c0_g1	Calcium load-activated calcium channel, partial [Mucuna pruriens]	F22B5.10	GO:0005739(mitochondrion);GO:0005794(Golgi apparatus);GO:0070588(calcium ion transmembrane transport)	NA	768	11	2	NA	NA	121.017	0	0	2.761e-53	2.58192e-52	yes
aly-miR2111a-5p_1ss19TG	TRINITY_DN13437_c0_g5	splicing factor 3B subunit 4 [Medicago truncatula]	SF3B4	GO:0003723(RNA binding);GO:0003729(mRNA binding);GO:0005634(nucleus);GO:0005730(nucleolus);GO:0009793(embryo development ending in seed dormancy)	ko03040(Spliceosome)	981	11	4	NA	NA	40.3388	0	0	3.0257e-18	5.71521e-18	yes
aly-miR2111a-5p_1ss19TG	TRINITY_DN13629_c0_g4	probable pectinesterase/pectinesterase inhibitor 51 [Medicago truncatula]	PME51	GO:0030599(pectinesterase activity);GO:0046910(pectinesterase inhibitor activity);GO:0071944(cell periphery)	ko00040(Pentose and glucuronate interconversions)	106	8	NA	4	4	0	30.5633	33.7644	9.1976e-08	9.66516e-08	yes
aly-miR2111a-5p_1ss19TG	TRINITY_DN13762_c0_g3	probable beta-D-xylosidase 2 [Medicago truncatula]	BXL2	GO:0009044(xylan 1,4-beta-xylosidase activity);GO:0009505(plant-type cell wall);GO:0031222(arabinan catabolic process);GO:0045493(xylan catabolic process);GO:0046556(alpha-L-arabinofuranosidase activity)	ko00520(Amino sugar and nucleotide sugar metabolism)	1002	9.5	4	NA	NA	40.3388	0	0	3.0257e-18	5.71521e-18	yes
aly-miR2111a-5p_1ss19TG	TRINITY_DN13773_c0_g1	peroxisomal adenine nucleotide carrier 1 [Medicago truncatula]	PNC1	GO:0003735(structural constituent of ribosome);GO:0006412(translation)	ko04146(Peroxisome)	611	8.5	NA	4	NA	0	30.5633	0	5.326e-14	6.30988e-14	yes
aly-miR2111a-5p_1ss19TG	TRINITY_DN13910_c1_g3	histone H3, partial [Beta vulgaris subsp. vulgaris]	MPH3	GO:0005515(protein binding)	NA	31	11	4	NA	NA	40.3388	0	0	3.0257e-18	5.71521e-18	yes
aly-miR2111a-5p_1ss19TG	TRINITY_DN13910_c1_g4	histone H3 [Zea mays]	HTR4	GO:0005515(protein binding)	NA	83	10.5	4	NA	NA	40.3388	0	0	3.0257e-18	5.71521e-18	yes
aly-miR2111a-5p_1ss19TG	TRINITY_DN14272_c0_g1	uncharacterized protein LOC11438615 [Medicago truncatula]	-	GO:0004712(protein serine/threonine/tyrosine kinase activity);GO:0005524(ATP binding);GO:0005634(nucleus);GO:0005886(plasma membrane);GO:0006468(protein phosphorylation);GO:0016301(kinase activity)	NA	502	8	4	NA	4	40.3388	0	33.7644	5.8097e-09	6.43576e-09	yes
aly-miR2111a-5p_1ss19TG	TRINITY_DN14661_c0_g4	GDP-mannose 3,5-epimerase [Medicago sativa]	OsI_032456	GO:0003824(catalytic activity);GO:0005737(cytoplasm);GO:0005829(cytosol);GO:0009225(nucleotide-sugar metabolic process);GO:0019853(L-ascorbic acid biosynthetic process);GO:0047918(GDP-mannose 3,5-epimerase activity);GO:0051287(NAD binding)	ko00053(Ascorbate and aldarate metabolism);ko00520(Amino sugar and nucleotide sugar metabolism)	1175	8	3	2	2	161.355	397.323	236.351	1.4861e-24	3.81833e-24	yes
aly-miR2111a-5p_1ss19TG	TRINITY_DN15520_c0_g1	protein NETWORKED 1D [Medicago truncatula]	NET1D	GO:0005886(plasma membrane);GO:0051015(actin filament binding)	NA	2772	9	4	NA	NA	40.3388	0	0	3.0257e-18	5.71521e-18	yes
aly-miR2111a-5p_1ss19TG	TRINITY_DN15726_c0_g1	uncharacterized protein LOC11407605 [Medicago truncatula]	-	GO:0003729(mRNA binding);GO:0005634(nucleus)	NA	1372	10.5	NA	4	NA	0	30.5633	0	5.326e-14	6.30988e-14	yes
aly-miR2111a-5p_1ss19TG	TRINITY_DN15846_c0_g1	protein FAR1-RELATED SEQUENCE 5-like [Medicago truncatula]	FRS5	GO:0005515(protein binding);GO:0005634(nucleus);GO:0006355(regulation of transcription, DNA-templated);GO:0008270(zinc ion binding);GO:0009585(red, far-red light phototransduction);GO:0009639(response to red or far red light);GO:0045893(positive regulation of transcription, DNA-templated)	NA	745	12	4	NA	NA	40.3388	0	0	3.0257e-18	5.71521e-18	yes
aly-miR2111a-5p_1ss19TG	TRINITY_DN16194_c0_g1	nascent polypeptide-associated complex subunit alpha-like protein 2 [Medicago truncatula]	At3g49470	GO:0003674(molecular_function);GO:0005634(nucleus);GO:0005829(cytosol);GO:0005854(nascent polypeptide-associated complex);GO:0015031(protein transport)	NA	600	8	3	3	3	282.372	152.816	236.351	4.2604e-09	4.82222e-09	yes
aly-miR2111a-5p_1ss19TG	TRINITY_DN17220_c0_g1	NADP-thioredoxin reductase A [Medicago truncatula]	NTR2	GO:0004791(thioredoxin-disulfide reductase activity);GO:0005739(mitochondrion);GO:0005829(cytosol);GO:0009846(pollen germination);GO:0009941(chloroplast envelope);GO:0019430(removal of superoxide radicals);GO:0042964(thioredoxin reduction);GO:0045454(cell redox homeostasis);GO:0048316(seed development);GO:0051781(positive regulation of cell division);GO:0055114(oxidation-reduction process);GO:009…	ko00450(Selenocompound metabolism)	1045	9	NA	3	3	0	61.1266	67.5288	8.4537e-15	1.20888e-14	yes
aly-miR2111a-5p_1ss19TG	TRINITY_DN17518_c0_g1	cytochrome P450 78A5 [Medicago truncatula]	CYP78A5	GO:0016020(membrane);GO:0016709(oxidoreductase activity, acting on paired donors, with incorporation or reduction of molecular oxygen, NAD(P)H as one donor, and incorporation of one atom of oxygen);GO:0044550(secondary metabolite biosynthetic process)	NA	1474	9	4	NA	NA	40.3388	0	0	3.0257e-18	5.71521e-18	yes
aly-miR2111a-5p_1ss19TG	TRINITY_DN17531_c2_g7	ATPase subunit 6 [Trifolium pratense]	ND2	GO:0005739(mitochondrion)	ko00190(Oxidative phosphorylation)	1884	9.5	4	NA	NA	40.3388	0	0	3.0257e-18	5.71521e-18	yes
aly-miR2111a-5p_1ss19TG	TRINITY_DN17736_c0_g1	U-box domain-containing protein 35 [Medicago truncatula]	PUB35	GO:0004674(protein serine/threonine kinase activity);GO:0004842(ubiquitin-protein transferase activity);GO:0005524(ATP binding);GO:0005634(nucleus);GO:0006468(protein phosphorylation);GO:0006950(response to stress);GO:0016301(kinase activity);GO:0016567(protein ubiquitination);GO:0046777(protein autophosphorylation)	NA	747	12	4	NA	NA	40.3388	0	0	3.0257e-18	5.71521e-18	yes
aly-miR2111a-5p_1ss19TG	TRINITY_DN17736_c0_g2	U-box domain-containing protein 35 isoform X2 [Medicago truncatula]	PUB35	GO:0004674(protein serine/threonine kinase activity);GO:0004842(ubiquitin-protein transferase activity);GO:0005524(ATP binding);GO:0005634(nucleus);GO:0006468(protein phosphorylation);GO:0006950(response to stress);GO:0016301(kinase activity);GO:0016567(protein ubiquitination);GO:0046777(protein autophosphorylation)	NA	747	12	NA	NA	2	0	0	101.293	1.0173e-44	7.03524e-44	yes
aly-miR2111a-5p_1ss19TG	TRINITY_DN17957_c1_g1	ras-related protein RAB2BV-like, partial [Trifolium pratense]	RAB11C	GO:0003924(GTPase activity);GO:0005525(GTP binding);GO:0005768(endosome);GO:0005794(Golgi apparatus);GO:0005886(plasma membrane);GO:0009504(cell plate);GO:0010008(endosome membrane);GO:0015031(protein transport);GO:0032482(Rab protein signal transduction);GO:0042546(cell wall biogenesis)	ko04144(Endocytosis)	897	10.5	NA	NA	4	0	0	33.7644	2.1684e-15	3.13149e-15	yes
aly-miR2111a-5p_1ss19TG	TRINITY_DN18338_c0_g3	transmembrane 9 superfamily member 12 [Medicago truncatula]	TMN12	GO:0016021(integral component of membrane)	NA	645	7.5	4	NA	NA	40.3388	0	0	3.0257e-18	5.71521e-18	yes
aly-miR2111a-5p_1ss19TG	TRINITY_DN19715_c0_g2	polyol transporter 5 [Medicago truncatula]	PLT5	GO:0005351(carbohydrate:proton symporter activity);GO:0005355(glucose transmembrane transporter activity);GO:0005887(integral component of plasma membrane);GO:0046323(glucose import)	NA	1484	12.5	NA	NA	2	0	0	101.293	1.0173e-44	7.03524e-44	yes
aly-miR2111a-5p_1ss19TG	TRINITY_DN19781_c0_g1	putative histone superfamily protein [Helianthus annuus]	HTR4	GO:0005515(protein binding)	NA	415	10	2	2	2	161.355	550.139	371.408	2.6346e-46	2.22777e-45	yes
aly-miR2111a-5p_1ss19TG	TRINITY_DN19781_c0_g3	putative histone H3, partial [Laburnum anagyroides]	HTR4	GO:0005515(protein binding)	NA	215	11	NA	4	4	0	30.5633	33.7644	9.1976e-08	9.66516e-08	yes
aly-miR2111a-5p_1ss19TG	TRINITY_DN19788_c0_g1	cystatin domain protein [Medicago truncatula]	-	NA	NA	25	7	NA	NA	3	0	0	67.5288	4.6985e-30	1.53517e-29	yes
aly-miR2111a-5p_1ss19TG	TRINITY_DN21381_c0_g2	UDP-glycosyltransferase 1 [Medicago truncatula]	GmIF7GT1	GO:0009813(flavonoid biosynthetic process);GO:0043231(intracellular membrane-bounded organelle);GO:0052696(flavonoid glucuronidation);GO:0080043(quercetin 3-O-glucosyltransferase activity);GO:0080044(quercetin 7-O-glucosyltransferase activity)	ko00943(Isoflavonoid biosynthesis)	475	13	NA	3	NA	0	91.6898	0	1.508e-40	8.68797e-40	yes
aly-miR2111a-5p_1ss19TG	TRINITY_DN21434_c0_g3	nuclear pore complex protein NUP96 isoform X1 [Medicago truncatula]	NUP96	GO:0000973(posttranscriptional tethering of RNA polymerase II gene DNA at nuclear periphery);GO:0003723(RNA binding);GO:0006405(RNA export from nucleus);GO:0006606(protein import into nucleus);GO:0008139(nuclear localization sequence binding);GO:0017056(structural constituent of nuclear pore);GO:0034398(telomere tethering at nuclear periphery);GO:0044614(nuclear pore cytoplasmic filaments)	ko03013(RNA transport)	3129	7	2	NA	NA	121.017	0	0	2.761e-53	2.58192e-52	yes
aly-miR2111a-5p_1ss19TG	TRINITY_DN21905_c1_g1	oligopeptidase A [Medicago truncatula]	OOP	GO:0004222(metalloendopeptidase activity);GO:0006518(peptide metabolic process);GO:0009507(chloroplast)	NA	2261	5	4	NA	NA	40.3388	0	0	3.0257e-18	5.71521e-18	yes
aly-miR2111a-5p_1ss19TG	TRINITY_DN21984_c0_g2	RecName: Full=Malate dehydrogenase [NADP], chloroplastic; AltName: Full=NADP-MDH; Flags: Precursor	MDH1	GO:0005737(cytoplasm);GO:0005739(mitochondrion);GO:0005975(carbohydrate metabolic process);GO:0006099(tricarboxylic acid cycle);GO:0006107(oxaloacetate metabolic process);GO:0006108(malate metabolic process);GO:0006734(NADH metabolic process);GO:0008746(NAD(P)+ transhydrogenase activity);GO:0009507(chloroplast);GO:0009570(chloroplast stroma);GO:0009579(thylakoid);GO:0009941(chloroplast envelope);…	ko00620(Pyruvate metabolism);ko00710(Carbon fixation in photosynthetic organisms)	306	9.5	NA	4	4	0	30.5633	33.7644	9.1976e-08	9.66516e-08	yes
aly-miR2111a-5p_1ss19TG	TRINITY_DN22226_c0_g2	putative transmembrane protein [Medicago truncatula]	-	GO:0003729(mRNA binding);GO:0005634(nucleus);GO:0005774(vacuolar membrane);GO:0005783(endoplasmic reticulum);GO:0005794(Golgi apparatus);GO:0005829(cytosol);GO:0005886(plasma membrane);GO:0009506(plasmodesma);GO:0016020(membrane)	NA	1636	8	NA	NA	4	0	0	33.7644	2.1684e-15	3.13149e-15	yes
aly-miR2111a-5p_1ss19TG	TRINITY_DN22805_c1_g1	YTH domain-containing family protein 2 isoform X1 [Medicago truncatula]	YTHDF2	GO:0003723(RNA binding);GO:0003729(mRNA binding);GO:0005634(nucleus);GO:0008150(biological_process)	NA	1348	10.5	NA	2	2	0	152.816	101.293	1.0116e-31	4.10625e-31	yes
aly-miR2111a-5p_1ss19TG	TRINITY_DN23232_c1_g2	uncharacterized protein LOC25498412 isoform X1 [Medicago truncatula]	-	GO:0003674(molecular_function);GO:0005634(nucleus);GO:0005739(mitochondrion);GO:0008150(biological_process)	NA	320	10	2	2	2	161.355	91.6898	236.351	1.1573e-14	1.63321e-14	yes
aly-miR2111a-5p_1ss19TG	TRINITY_DN23289_c1_g2	eukaryotic translation initiation factor 5B [Medicago truncatula]	-	GO:0005507(copper ion binding);GO:0005634(nucleus);GO:0005759(mitochondrial matrix)	NA	912	9.5	3	3	NA	121.017	91.6898	0	3.8632e-25	1.00369e-24	yes
aly-miR2111a-5p_1ss19TG	TRINITY_DN23637_c0_g1	non-canonical poly(A) RNA polymerase PAPD7 [Medicago truncatula]	Trf4-1	GO:0003676(nucleic acid binding);GO:0005634(nucleus);GO:0006364(rRNA processing);GO:0070566(adenylyltransferase activity)	ko03018(RNA degradation)	1036	14	NA	NA	4	0	0	33.7644	2.1684e-15	3.13149e-15	yes
aly-miR2111a-5p_1ss19TG	TRINITY_DN23711_c0_g2	F-box/kelch-repeat protein At3g27150 [Medicago truncatula]	At3g27150	GO:0004842(ubiquitin-protein transferase activity);GO:0031463(Cul3-RING ubiquitin ligase complex)	NA	191	2.5	0	4	1	282.372	30.5633	168.822	9.6603e-44	6.60053e-43	yes
aly-miR2111a-5p_1ss19TG	TRINITY_DN23861_c0_g1	probable acyl-CoA dehydrogenase IBR3 [Medicago truncatula]	IBR3	GO:0000062(fatty-acyl-CoA binding);GO:0003995(acyl-CoA dehydrogenase activity);GO:0009055(electron transfer activity);GO:0033539(fatty acid beta-oxidation using acyl-CoA dehydrogenase);GO:0050660(flavin adenine dinucleotide binding);GO:0052890(oxidoreductase activity, acting on the CH-CH group of donors, with a flavin as acceptor);GO:0055088(lipid homeostasis)	ko00640(Propanoate metabolism);ko00071(Fatty acid degradation);ko00280(Valine, leucine and isoleucine degradation);ko00410(beta-Alanine metabolism)	1971	10	4	4	NA	40.3388	30.5633	0	7.2896e-09	7.93241e-09	yes
aly-miR2111a-5p_1ss19TG	TRINITY_DN23995_c0_g1	GTP-binding elongation factor Tu family protein [Medicago truncatula]	REFA1	GO:0003746(translation elongation factor activity);GO:0003924(GTPase activity);GO:0005622(intracellular)	ko03013(RNA transport)	368	14	2	3	2	201.694	61.1266	168.822	4.7746e-17	8.89187e-17	yes
aly-miR2111a-5p_1ss19TG	TRINITY_DN24049_c0_g2	uncharacterized protein ycf45 isoform X1 [Medicago truncatula]	ycf45	GO:0009507(chloroplast)	NA	182	9	4	4	4	40.3388	30.5633	33.7644	0.49068	0.491154	yes
aly-miR2111a-5p_1ss19TG	TRINITY_DN24114_c0_g4	E3 ubiquitin-protein ligase RHF2A, putative [Medicago truncatula]	RHF1A	GO:0000209(protein polyubiquitination);GO:0043161(proteasome-mediated ubiquitin-dependent protein catabolic process);GO:0061630(ubiquitin protein ligase activity)	NA	494	9	NA	NA	2	0	0	67.5288	4.6985e-30	1.53517e-29	yes
aly-miR2111a-5p_1ss19TG	TRINITY_DN24356_c0_g2	putative P-loop containing nucleoside triphosphate hydrolase [Medicago truncatula]	SMAX1	GO:0005524(ATP binding);GO:0005737(cytoplasm);GO:0006351(transcription, DNA-templated);GO:0006355(regulation of transcription, DNA-templated);GO:0009845(seed germination);GO:0016787(hydrolase activity);GO:0019538(protein metabolic process);GO:0080167(response to karrikin);GO:0090351(seedling development);GO:1902347(response to strigolactone)	NA	1473	10	4	NA	2	40.3388	0	135.058	1.9664e-36	1.05548e-35	yes
aly-miR2111a-5p_1ss19TG	TRINITY_DN24668_c0_g2	probable 1-deoxy-D-xylulose-5-phosphate synthase, chloroplastic [Medicago truncatula]	TKT2	GO:0005515(protein binding);GO:0008661(1-deoxy-D-xylulose-5-phosphate synthase activity);GO:0009228(thiamine biosynthetic process);GO:0009507(chloroplast);GO:0009570(chloroplast stroma);GO:0015995(chlorophyll biosynthetic process);GO:0016114(terpenoid biosynthetic process);GO:0019288(isopentenyl diphosphate biosynthetic process, methylerythritol 4-phosphate pathway);GO:0046872(metal ion binding);…	ko00730(Thiamine metabolism);ko00900(Terpenoid backbone biosynthesis)	598	5	NA	NA	2	0	0	135.058	2.2009e-59	2.88805e-58	yes
aly-miR2111a-5p_1ss19TG	TRINITY_DN24763_c1_g1	DNA-directed RNA polymerase I subunit rpa49 [Medicago truncatula]	-	GO:0001054(RNA polymerase I activity);GO:0005736(DNA-directed RNA polymerase I complex)	ko00230(Purine metabolism);ko00240(Pyrimidine metabolism);ko03020(RNA polymerase)	1047	13	NA	4	NA	0	30.5633	0	5.326e-14	6.30988e-14	yes
aly-miR2111a-5p_1ss19TG	TRINITY_DN24958_c1_g1	uncharacterized protein LOC11423568 [Medicago truncatula]	TCP11	GO:0005634(nucleus);GO:0008150(biological_process);GO:0009506(plasmodesma)	NA	578	8.5	NA	NA	4	0	0	33.7644	2.1684e-15	3.13149e-15	yes
aly-miR2111a-5p_1ss19TG	TRINITY_DN25119_c0_g1	uncharacterized protein LOC11438423 isoform X2 [Medicago truncatula]	-	GO:0003677(DNA binding);GO:0003682(chromatin binding);GO:0005634(nucleus);GO:0008150(biological_process);GO:0009506(plasmodesma)	NA	896	7.5	0	2	0	887.455	580.702	1080.46	3.1722e-33	1.31818e-32	yes
aly-miR2111a-5p_1ss19TG	TRINITY_DN25291_c0_g1	transcription factor bHLH143 [Medicago truncatula]	BHLH143	GO:0001046(core promoter sequence-specific DNA binding);GO:0001228(transcriptional activator activity, RNA polymerase II transcription regulatory region sequence-specific DNA binding);GO:0005634(nucleus);GO:0006366(transcription by RNA polymerase II)	NA	926	7.5	NA	4	NA	0	30.5633	0	5.326e-14	6.30988e-14	yes
aly-miR2111a-5p_1ss19TG	TRINITY_DN25444_c0_g1	probable ubiquitin-like-specific protease 2B isoform X2 [Medicago truncatula]	ULP2B	GO:0006508(proteolysis);GO:0008234(cysteine-type peptidase activity)	NA	789	8.5	NA	2	NA	0	61.1266	0	2.8349e-27	7.6679e-27	yes
aly-miR2111a-5p_1ss19TG	TRINITY_DN25525_c0_g1	cryptochrome-1 [Medicago truncatula]	CRY2	GO:0005515(protein binding);GO:0005524(ATP binding);GO:0005634(nucleus);GO:0005737(cytoplasm);GO:0005773(vacuole);GO:0006325(chromatin organization);GO:0006338(chromatin remodeling);GO:0007623(circadian rhythm);GO:0009414(response to water deprivation);GO:0009416(response to light stimulus);GO:0009637(response to blue light);GO:0009638(phototropism);GO:0009646(response to absence of light);GO:000…	ko04712(Circadian rhythm - plant)	1555	8	NA	4	4	0	30.5633	33.7644	9.1976e-08	9.66516e-08	yes
aly-miR2111a-5p_1ss19TG	TRINITY_DN25525_c0_g1	cryptochrome-1 [Medicago truncatula]	CRY2	GO:0005515(protein binding);GO:0005524(ATP binding);GO:0005634(nucleus);GO:0005737(cytoplasm);GO:0005773(vacuole);GO:0006325(chromatin organization);GO:0006338(chromatin remodeling);GO:0007623(circadian rhythm);GO:0009414(response to water deprivation);GO:0009416(response to light stimulus);GO:0009637(response to blue light);GO:0009638(phototropism);GO:0009646(response to absence of light);GO:000…	ko04712(Circadian rhythm - plant)	1601	14	NA	4	NA	0	30.5633	0	5.326e-14	6.30988e-14	yes
aly-miR2111a-5p_1ss19TG	TRINITY_DN25648_c1_g1	polyadenylation and cleavage factor homolog 4 [Medicago truncatula]	PCFS4	GO:0000993(RNA polymerase II core binding);GO:0003729(mRNA binding);GO:0005737(cytoplasm);GO:0005849(mRNA cleavage factor complex);GO:0006369(termination of RNA polymerase II transcription);GO:0006378(mRNA polyadenylation);GO:0006379(mRNA cleavage)	ko03015(mRNA surveillance pathway)	1767	15	NA	NA	4	0	0	33.7644	2.1684e-15	3.13149e-15	yes
aly-miR2111a-5p_1ss19TG	TRINITY_DN25937_c1_g1	putative DNA glycosylase, helix-turn-helix, base-excision DNA repair, demeter [Medicago truncatula]	ROS1	GO:0003677(DNA binding);GO:0003906(DNA-(apurinic or apyrimidinic site) lyase activity);GO:0005515(protein binding);GO:0005634(nucleus);GO:0005730(nucleolus);GO:0006281(DNA repair);GO:0006284(base-excision repair);GO:0006306(DNA methylation);GO:0006342(chromatin silencing);GO:0006351(transcription, DNA-templated);GO:0019104(DNA N-glycosylase activity);GO:0031936(negative regulation of chromatin si…	NA	2745	6.5	NA	4	NA	0	30.5633	0	5.326e-14	6.30988e-14	yes
aqc-MIR166d-p3_2ss11AT19GT	TRINITY_DN11620_c0_g1	uncharacterized protein LOC11432930 isoform X1 [Medicago truncatula]	-	GO:0005886(plasma membrane);GO:0008150(biological_process)	NA	444	6	NA	NA	2	0	0	101.293	1.0173e-44	7.03524e-44	yes
aqc-MIR166d-p3_2ss11AT19GT	TRINITY_DN11757_c0_g1	pyridoxal phosphate homeostasis protein [Medicago truncatula]	PROSC	GO:0005622(intracellular);GO:0030170(pyridoxal phosphate binding)	NA	156	10.5	4	NA	NA	40.3388	0	0	3.0257e-18	5.71521e-18	yes
aqc-MIR166d-p3_2ss11AT19GT	TRINITY_DN12473_c0_g1	putative amino acid transporter, transmembrane domain-containing protein [Medicago truncatula]	-	GO:0005774(vacuolar membrane);GO:0005886(plasma membrane);GO:0006865(amino acid transport);GO:0015171(amino acid transmembrane transporter activity);GO:0016020(membrane);GO:0016021(integral component of membrane)	NA	505	13	NA	2	NA	0	61.1266	0	2.8349e-27	7.6679e-27	yes
aqc-MIR166d-p3_2ss11AT19GT	TRINITY_DN12714_c2_g1	cytochrome b559 (chloroplast) [Artemisia annua]	psbE	GO:0009536(plastid)	ko00195(Photosynthesis)	158	6	2	NA	NA	201.694	0	0	0	0	yes
aqc-MIR166d-p3_2ss11AT19GT	TRINITY_DN13244_c0_g3	chromosome condensation regulator RCC1 repeat protein [Medicago truncatula]	HERC2	GO:0005737(cytoplasm);GO:0005739(mitochondrion);GO:0008380(RNA splicing);GO:0008536(Ran GTPase binding);GO:0032981(mitochondrial respiratory chain complex I assembly)	ko04120(Ubiquitin mediated proteolysis)	254	8	NA	NA	4	0	0	33.7644	2.1684e-15	3.13149e-15	yes
aqc-MIR166d-p3_2ss11AT19GT	TRINITY_DN13419_c0_g1	Vacuolar-sorting receptor 1 [Medicago truncatula]	BP80	GO:0000139(Golgi membrane);GO:0005509(calcium ion binding);GO:0005768(endosome);GO:0005794(Golgi apparatus);GO:0005802(trans-Golgi network);GO:0005887(integral component of plasma membrane);GO:0006623(protein targeting to vacuole);GO:0006886(intracellular protein transport);GO:0016020(membrane);GO:0016021(integral component of membrane);GO:0017119(Golgi transport complex);GO:0030665(clathrin-coat…	ko00941(Flavonoid biosynthesis)	1281	7.5	2	3	NA	121.017	61.1266	0	6.4312e-27	1.72641e-26	yes
aqc-MIR166d-p3_2ss11AT19GT	TRINITY_DN13481_c0_g1	putative nucleotide-binding alpha-beta plait domain-containing protein [Medicago truncatula]	-	NA	NA	225	9	4	NA	NA	40.3388	0	0	3.0257e-18	5.71521e-18	yes
aqc-MIR166d-p3_2ss11AT19GT	TRINITY_DN13507_c0_g1	hypothetical protein MtrunA17_Chr8g0374991 [Medicago truncatula]	At3g27390	GO:0003674(molecular_function);GO:0005576(extracellular region);GO:0008150(biological_process);GO:0016021(integral component of membrane)	NA	751	8.5	NA	4	NA	0	30.5633	0	5.326e-14	6.30988e-14	yes
aqc-MIR166d-p3_2ss11AT19GT	TRINITY_DN13660_c0_g3	23 kDa jasmonate-induced protein-like [Spinacia oleracea]	-	NA	NA	643	11.5	NA	NA	3	0	0	67.5288	4.6985e-30	1.53517e-29	yes
aqc-MIR166d-p3_2ss11AT19GT	TRINITY_DN13674_c0_g1	NAC domain-containing protein 21/22 [Medicago truncatula]	NAC021	GO:0003677(DNA binding);GO:0003700(DNA binding transcription factor activity);GO:0005634(nucleus);GO:0006351(transcription, DNA-templated);GO:0006355(regulation of transcription, DNA-templated);GO:0007275(multicellular organism development);GO:0009734(auxin-activated signaling pathway);GO:0010072(primary shoot apical meristem specification);GO:0048527(lateral root development)	NA	626	7	NA	NA	4	0	0	33.7644	2.1684e-15	3.13149e-15	yes
aqc-MIR166d-p3_2ss11AT19GT	TRINITY_DN13787_c3_g1	plastidic ATP/ADP-transporter [Medicago truncatula]	-	GO:0005471(ATP:ADP antiporter activity);GO:0005524(ATP binding);GO:0009507(chloroplast);GO:0009536(plastid);GO:0009941(chloroplast envelope);GO:0016020(membrane);GO:0016021(integral component of membrane);GO:0031969(chloroplast membrane)	NA	159	4.5	2	3	3	242.033	61.1266	67.5288	9.1527e-38	5.04351e-37	yes
aqc-MIR166d-p3_2ss11AT19GT	TRINITY_DN13884_c0_g2	PREDICTED: uncharacterized protein LOC108946483 [Nicotiana tomentosiformis]	NAD7	GO:0005739(mitochondrion)	ko00190(Oxidative phosphorylation)	1351	6	NA	4	NA	0	30.5633	0	5.326e-14	6.30988e-14	yes
aqc-MIR166d-p3_2ss11AT19GT	TRINITY_DN14357_c0_g2	-	-	NA	NA	22	9	4	3	NA	40.3388	61.1266	0	3.9437e-13	4.56816e-13	yes
aqc-MIR166d-p3_2ss11AT19GT	TRINITY_DN14611_c0_g1	filament-like plant protein [Medicago truncatula]	FPP	GO:0005515(protein binding);GO:0030674(protein binding, bridging);GO:0031410(cytoplasmic vesicle);GO:0060178(regulation of exocyst localization)	NA	2400	10	NA	4	4	0	30.5633	33.7644	9.1976e-08	9.66516e-08	yes
aqc-MIR166d-p3_2ss11AT19GT	TRINITY_DN14747_c1_g1	small RNA-binding protein 11, chloroplastic isoform X2 [Medicago truncatula]	RZ1A	GO:0003676(nucleic acid binding);GO:0005634(nucleus);GO:0008150(biological_process)	NA	346	6	NA	NA	4	0	0	33.7644	2.1684e-15	3.13149e-15	yes
aqc-MIR166d-p3_2ss11AT19GT	TRINITY_DN14823_c0_g2	cytochrome c-2 [Medicago truncatula]	CYTC-2	GO:0005507(copper ion binding);GO:0005739(mitochondrion);GO:0005758(mitochondrial intermembrane space);GO:0005794(Golgi apparatus);GO:0005829(cytosol);GO:0006122(mitochondrial electron transport, ubiquinol to cytochrome c);GO:0006123(mitochondrial electron transport, cytochrome c to oxygen);GO:0009055(electron transfer activity);GO:0020037(heme binding);GO:0070469(respiratory chain)	NA	195	8	3	4	3	80.6777	30.5633	67.5288	1.2003e-05	1.24569e-05	yes
aqc-MIR166d-p3_2ss11AT19GT	TRINITY_DN15191_c0_g1	putative lysine-specific demethylase JMJ16 [Medicago truncatula]	JMJ16	GO:0003700(DNA binding transcription factor activity);GO:0005634(nucleus);GO:0006351(transcription, DNA-templated);GO:0006355(regulation of transcription, DNA-templated);GO:0016569(covalent chromatin modification);GO:0046872(metal ion binding);GO:0051213(dioxygenase activity);GO:0055114(oxidation-reduction process)	NA	3644	8	NA	2	NA	0	61.1266	0	2.8349e-27	7.6679e-27	yes
aqc-MIR166d-p3_2ss11AT19GT	TRINITY_DN15250_c0_g1	uncharacterized protein LOC11439344 isoform X1 [Medicago truncatula]	-	GO:0005737(cytoplasm);GO:0009507(chloroplast)	NA	1154	3.5	2	4	2	80.6777	30.5633	101.293	7.7256e-09	8.39803e-09	yes
aqc-MIR166d-p3_2ss11AT19GT	TRINITY_DN15305_c0_g6	WRKY transcription factor 56 [Medicago sativa]	WRKY40	GO:0002237(response to molecule of bacterial origin);GO:0003700(DNA binding transcription factor activity);GO:0005515(protein binding);GO:0005634(nucleus);GO:0006351(transcription, DNA-templated);GO:0006355(regulation of transcription, DNA-templated);GO:0009611(response to wounding);GO:0009751(response to salicylic acid);GO:0010200(response to chitin);GO:0031347(regulation of defense response);GO…	ko04626(Plant-pathogen interaction)	1435	16.5	NA	3	3	0	61.1266	67.5288	8.4537e-15	1.20888e-14	yes
aqc-MIR166d-p3_2ss11AT19GT	TRINITY_DN15419_c0_g3	transcription factor AS1 [Medicago truncatula]	AS1	GO:0000793(condensed chromosome);GO:0000981(RNA polymerase II transcription factor activity, sequence-specific DNA binding);GO:0001135(transcription factor activity, RNA polymerase II transcription factor recruiting);GO:0003677(DNA binding);GO:0003700(DNA binding transcription factor activity);GO:0005515(protein binding);GO:0005634(nucleus);GO:0005730(nucleolus);GO:0006351(transcription, DNA-temp…	NA	1429	6.5	NA	NA	3	0	0	67.5288	4.6985e-30	1.53517e-29	yes
aqc-MIR166d-p3_2ss11AT19GT	TRINITY_DN15526_c0_g2	probable galacturonosyltransferase 11 [Medicago truncatula]	GAUT11	GO:0000139(Golgi membrane);GO:0005794(Golgi apparatus);GO:0010192(mucilage biosynthetic process);GO:0016021(integral component of membrane);GO:0045489(pectin biosynthetic process);GO:0047262(polygalacturonate 4-alpha-galacturonosyltransferase activity);GO:0071555(cell wall organization)	ko00520(Amino sugar and nucleotide sugar metabolism)	347	8.5	NA	4	NA	0	30.5633	0	5.326e-14	6.30988e-14	yes
aqc-MIR166d-p3_2ss11AT19GT	TRINITY_DN15622_c0_g4	uncharacterized protein LOC11428767 [Medicago truncatula]	-	GO:0003674(molecular_function);GO:0009507(chloroplast);GO:0009523(photosystem II);GO:0009535(chloroplast thylakoid membrane);GO:0015979(photosynthesis);GO:0016021(integral component of membrane)	NA	512	8.5	3	3	3	80.6777	61.1266	67.5288	0.24075	0.242431	yes
aqc-MIR166d-p3_2ss11AT19GT	TRINITY_DN15719_c0_g1	trihelix transcription factor ASIL2 isoform X2 [Medicago truncatula]	ASIL2	GO:0003700(DNA binding transcription factor activity);GO:0005515(protein binding);GO:0005634(nucleus);GO:0006355(regulation of transcription, DNA-templated)	NA	695	8	NA	4	NA	0	30.5633	0	5.326e-14	6.30988e-14	yes
aqc-MIR166d-p3_2ss11AT19GT	TRINITY_DN15823_c0_g1	hypothetical protein MtrunA17_Chr5g0443411 [Medicago truncatula]	-	NA	ko00230(Purine metabolism);ko00240(Pyrimidine metabolism);ko03020(RNA polymerase)	1449	5.5	3	3	2	80.6777	91.6898	270.115	5.0248e-34	2.17036e-33	yes
aqc-MIR166d-p3_2ss11AT19GT	TRINITY_DN15823_c0_g1	hypothetical protein MtrunA17_Chr5g0443411 [Medicago truncatula]	-	NA	ko00230(Purine metabolism);ko00240(Pyrimidine metabolism);ko03020(RNA polymerase)	1512	5.5	4	3	3	40.3388	91.6898	135.058	1.0762e-11	1.23257e-11	yes
aqc-MIR166d-p3_2ss11AT19GT	TRINITY_DN15835_c1_g3	CBL-interacting serine/threonine-protein kinase 24 isoform X1 [Medicago truncatula]	CIPK24	GO:0004674(protein serine/threonine kinase activity);GO:0005634(nucleus);GO:0005737(cytoplasm);GO:0006468(protein phosphorylation);GO:0035556(intracellular signal transduction)	NA	1674	14.5	NA	2	NA	0	61.1266	0	2.8349e-27	7.6679e-27	yes
aqc-MIR166d-p3_2ss11AT19GT	TRINITY_DN15857_c1_g2	-	-	NA	NA	313	8	4	NA	NA	40.3388	0	0	3.0257e-18	5.71521e-18	yes
aqc-MIR166d-p3_2ss11AT19GT	TRINITY_DN15861_c0_g1	protein CutA 1, chloroplastic isoform X1 [Medicago truncatula]	CUTA1	GO:0005507(copper ion binding)	NA	278	8	NA	NA	2	0	0	67.5288	4.6985e-30	1.53517e-29	yes
aqc-MIR166d-p3_2ss11AT19GT	TRINITY_DN15937_c0_g1	oligopeptide transporter 5 [Medicago truncatula]	OPT5	GO:0005737(cytoplasm);GO:0005887(integral component of plasma membrane);GO:0006857(oligopeptide transport);GO:0015031(protein transport);GO:0016020(membrane);GO:0035673(oligopeptide transmembrane transporter activity)	NA	847	8.5	4	NA	NA	40.3388	0	0	3.0257e-18	5.71521e-18	yes
aqc-MIR166d-p3_2ss11AT19GT	TRINITY_DN15975_c0_g1	phosphoinositide phospholipase C 2 [Medicago truncatula]	PLC2	GO:0004435(phosphatidylinositol phospholipase C activity);GO:0004629(phospholipase C activity);GO:0005515(protein binding);GO:0005886(plasma membrane);GO:0007165(signal transduction);GO:0009553(embryo sac development);GO:0009556(microsporogenesis);GO:0010601(positive regulation of auxin biosynthetic process);GO:0016042(lipid catabolic process);GO:0035556(intracellular signal transduction);GO:0042…	ko00562(Inositol phosphate metabolism);ko04070(Phosphatidylinositol signaling system);ko04933(AGE-RAGE signaling pathway in diabetic complications)	14	6	4	NA	NA	40.3388	0	0	3.0257e-18	5.71521e-18	yes
aqc-MIR166d-p3_2ss11AT19GT	TRINITY_DN15977_c0_g1	protein DEHYDRATION-INDUCED 19 homolog 5 [Medicago truncatula]	-	NA	NA	245	8.5	4	NA	NA	40.3388	0	0	3.0257e-18	5.71521e-18	yes
aqc-MIR166d-p3_2ss11AT19GT	TRINITY_DN16006_c1_g1	BEL1-like homeodomain protein 9 [Medicago truncatula]	BLH9	GO:0003677(DNA binding);GO:0003700(DNA binding transcription factor activity);GO:0005515(protein binding);GO:0005634(nucleus);GO:0005829(cytosol);GO:0006351(transcription, DNA-templated);GO:0007389(pattern specification process);GO:0010051(xylem and phloem pattern formation);GO:0010076(maintenance of floral meristem identity);GO:0010077(maintenance of inflorescence meristem identity);GO:0010089(x…	NA	911	6	4	NA	2	40.3388	0	101.293	1.1933e-24	3.06672e-24	yes
aqc-MIR166d-p3_2ss11AT19GT	TRINITY_DN16120_c0_g1	scarecrow-like protein 21 [Medicago truncatula]	CIGR1	GO:0003700(DNA binding transcription factor activity);GO:0005634(nucleus);GO:0006355(regulation of transcription, DNA-templated);GO:0043565(sequence-specific DNA binding)	ko04075(Plant hormone signal transduction)	706	12.5	NA	3	NA	0	61.1266	0	2.8349e-27	7.6679e-27	yes
aqc-MIR166d-p3_2ss11AT19GT	TRINITY_DN16128_c0_g3	hypothetical protein TSUD_93040 [Trifolium subterraneum]	-	NA	NA	488	5	NA	NA	4	0	0	33.7644	2.1684e-15	3.13149e-15	yes
aqc-MIR166d-p3_2ss11AT19GT	TRINITY_DN16177_c0_g6	NADP-dependent glyceraldehyde-3-phosphate dehydrogenase [Medicago truncatula]	GAPN	GO:0004029(aldehyde dehydrogenase (NAD) activity);GO:0004777(succinate-semialdehyde dehydrogenase (NAD+) activity);GO:0009013(succinate-semialdehyde dehydrogenase [NAD(P)+] activity)	ko00010(Glycolysis / Gluconeogenesis);ko00030(Pentose phosphate pathway)	1057	7.5	NA	NA	4	0	0	33.7644	2.1684e-15	3.13149e-15	yes
aqc-MIR166d-p3_2ss11AT19GT	TRINITY_DN16207_c2_g2	E3 ubiquitin-protein ligase SINA-like 10 [Medicago truncatula]	At5g37930	GO:0005634(nucleus);GO:0005737(cytoplasm);GO:0006915(apoptotic process);GO:0043161(proteasome-mediated ubiquitin-dependent protein catabolic process);GO:0061630(ubiquitin protein ligase activity)	ko04120(Ubiquitin mediated proteolysis)	19	7	4	NA	NA	40.3388	0	0	3.0257e-18	5.71521e-18	yes
aqc-MIR166d-p3_2ss11AT19GT	TRINITY_DN16232_c0_g3	U-box domain-containing protein 6 [Medicago truncatula]	PUB6	GO:0004842(ubiquitin-protein transferase activity);GO:0005634(nucleus);GO:0009507(chloroplast);GO:0016567(protein ubiquitination)	NA	690	7.5	NA	NA	2	0	0	101.293	1.0173e-44	7.03524e-44	yes
aqc-MIR166d-p3_2ss11AT19GT	TRINITY_DN16414_c1_g3	probable serine/threonine-protein kinase PBL15 [Medicago truncatula]	PBL15	GO:0005524(ATP binding);GO:0006952(defense response);GO:0016301(kinase activity);GO:0016310(phosphorylation)	NA	612	9	4	4	NA	40.3388	30.5633	0	7.2896e-09	7.93241e-09	yes
aqc-MIR166d-p3_2ss11AT19GT	TRINITY_DN16475_c0_g3	RNA-binding protein 24 isoform X2 [Medicago truncatula]	ARP1	GO:0003723(RNA binding);GO:0003729(mRNA binding);GO:0005576(extracellular region);GO:0008150(biological_process)	ko03040(Spliceosome)	943	8.5	NA	NA	4	0	0	33.7644	2.1684e-15	3.13149e-15	yes
aqc-MIR166d-p3_2ss11AT19GT	TRINITY_DN16524_c0_g2	adaptin ear-binding coat-associated protein 2 [Medicago truncatula]	Necap2	GO:0003674(molecular_function);GO:0005737(cytoplasm);GO:0006897(endocytosis);GO:0016020(membrane);GO:0016192(vesicle-mediated transport);GO:0030125(clathrin vesicle coat)	NA	789	5	NA	2	NA	0	61.1266	0	2.8349e-27	7.6679e-27	yes
aqc-MIR166d-p3_2ss11AT19GT	TRINITY_DN16647_c0_g1	23 kDa jasmonate-induced protein-like [Spinacia oleracea]	-	NA	NA	629	7	NA	2	2	0	152.816	168.822	6.5367e-36	3.48074e-35	yes
aqc-MIR166d-p3_2ss11AT19GT	TRINITY_DN16887_c0_g1	probable LRR receptor-like serine/threonine-protein kinase At5g10290 [Medicago truncatula]	At5g10290	GO:0005524(ATP binding);GO:0005886(plasma membrane);GO:0016021(integral component of membrane);GO:0016301(kinase activity)	NA	504	7	NA	NA	2	0	0	67.5288	4.6985e-30	1.53517e-29	yes
aqc-MIR166d-p3_2ss11AT19GT	TRINITY_DN17111_c0_g3	phytoene synthase [Medicago sativa]	PSY	GO:0009575(chromoplast stroma);GO:0016117(carotenoid biosynthetic process);GO:0016767(geranylgeranyl-diphosphate geranylgeranyltransferase activity)	ko00906(Carotenoid biosynthesis)	538	5	NA	4	NA	0	30.5633	0	5.326e-14	6.30988e-14	yes
aqc-MIR166d-p3_2ss11AT19GT	TRINITY_DN17435_c0_g1	RNA polymerase II C-terminal domain phosphatase-like 1 [Medicago truncatula]	CPL1	GO:0008420(CTD phosphatase activity);GO:0016591(DNA-directed RNA polymerase II, holoenzyme);GO:0070940(dephosphorylation of RNA polymerase II C-terminal domain)	NA	1754	19	4	NA	NA	40.3388	0	0	3.0257e-18	5.71521e-18	yes
aqc-MIR166d-p3_2ss11AT19GT	TRINITY_DN17455_c0_g3	LOW QUALITY PROTEIN: 60S ribosomal protein L6-3 [Medicago truncatula]	RPL6	GO:0000027(ribosomal large subunit assembly);GO:0002181(cytoplasmic translation);GO:0003735(structural constituent of ribosome);GO:0022625(cytosolic large ribosomal subunit)	ko03010(Ribosome)	44	8.5	2	2	2	201.694	122.253	135.058	6.8451e-06	7.12731e-06	yes
aqc-MIR166d-p3_2ss11AT19GT	TRINITY_DN17548_c0_g1	inositol-pentakisphosphate 2-kinase-like protein [Medicago truncatula]	IPK1	GO:0005524(ATP binding);GO:0005634(nucleus);GO:0005737(cytoplasm);GO:0010264(myo-inositol hexakisphosphate biosynthetic process);GO:0030643(cellular phosphate ion homeostasis);GO:0032942(inositol tetrakisphosphate 2-kinase activity);GO:0035299(inositol pentakisphosphate 2-kinase activity);GO:0040007(growth);GO:0042742(defense response to bacterium);GO:0046872(metal ion binding);GO:0048527(lateral…	ko00562(Inositol phosphate metabolism);ko04070(Phosphatidylinositol signaling system)	351	8	4	2	2	40.3388	152.816	101.293	9.3536e-15	1.33623e-14	yes
aqc-MIR166d-p3_2ss11AT19GT	TRINITY_DN17567_c1_g4	actin-related protein 3 [Medicago truncatula]	ARP3	GO:0000902(cell morphogenesis);GO:0003779(actin binding);GO:0005200(structural constituent of cytoskeleton);GO:0005524(ATP binding);GO:0005737(cytoplasm);GO:0005829(cytosol);GO:0005885(Arp2/3 protein complex);GO:0007015(actin filament organization);GO:0007275(multicellular organism development);GO:0009825(multidimensional cell growth);GO:0010090(trichome morphogenesis);GO:0034314(Arp2/3 complex-m…	NA	1815	6.5	NA	NA	4	0	0	33.7644	2.1684e-15	3.13149e-15	yes
aqc-MIR166d-p3_2ss11AT19GT	TRINITY_DN17600_c0_g4	hypothetical protein B456_004G005600 [Gossypium raimondii]	-	GO:0000786(nucleosome);GO:0003677(DNA binding);GO:0005634(nucleus);GO:0005794(Golgi apparatus);GO:0005829(cytosol);GO:0006334(nucleosome assembly);GO:0051276(chromosome organization)	NA	140	10	2	4	NA	161.355	30.5633	0	1.3383e-50	1.20882e-49	yes
aqc-MIR166d-p3_2ss11AT19GT	TRINITY_DN17957_c1_g2	mitochondrial fission 1 protein A [Medicago truncatula]	FIS1A	GO:0000266(mitochondrial fission);GO:0005515(protein binding);GO:0005739(mitochondrion);GO:0005741(mitochondrial outer membrane);GO:0005777(peroxisome);GO:0005778(peroxisomal membrane);GO:0006915(apoptotic process);GO:0007005(mitochondrion organization);GO:0009507(chloroplast);GO:0016021(integral component of membrane);GO:0016559(peroxisome fission)	NA	545	10	NA	4	NA	0	30.5633	0	5.326e-14	6.30988e-14	yes
aqc-MIR166d-p3_2ss11AT19GT	TRINITY_DN18041_c0_g2	probable xyloglucan endotransglucosylase/hydrolase protein 30 [Medicago truncatula]	XTH30	GO:0004553(hydrolase activity, hydrolyzing O-glycosyl compounds);GO:0005618(cell wall);GO:0010411(xyloglucan metabolic process);GO:0016762(xyloglucan:xyloglucosyl transferase activity);GO:0016798(hydrolase activity, acting on glycosyl bonds);GO:0042546(cell wall biogenesis);GO:0048046(apoplast);GO:0071555(cell wall organization)	NA	945	6	NA	3	NA	0	61.1266	0	2.8349e-27	7.6679e-27	yes
aqc-MIR166d-p3_2ss11AT19GT	TRINITY_DN18269_c0_g2	probable steroid-binding protein 3 [Medicago truncatula]	MP3	GO:0012505(endomembrane system);GO:0016020(membrane)	NA	157	8	2	2	NA	121.017	152.816	0	1.1569e-31	4.68769e-31	yes
aqc-MIR166d-p3_2ss11AT19GT	TRINITY_DN18346_c0_g4	uncharacterized protein LOC11435286 [Medicago truncatula]	-	NA	NA	281	5.5	NA	2	NA	0	397.323	0	0	0	yes
aqc-MIR166d-p3_2ss11AT19GT	TRINITY_DN18629_c0_g3	ubiquinol oxidase 2, mitochondrial [Medicago truncatula]	AOX2	GO:0005739(mitochondrion);GO:0005740(mitochondrial envelope);GO:0005743(mitochondrial inner membrane);GO:0009916(alternative oxidase activity);GO:0010230(alternative respiration);GO:0016021(integral component of membrane);GO:0046872(metal ion binding);GO:0055114(oxidation-reduction process);GO:0070469(respiratory chain);GO:0102721(ubiquinol:oxygen oxidoreductase activity)	NA	128	8.5	4	NA	3	40.3388	0	67.5288	1.1364e-14	1.60392e-14	yes
aqc-MIR166d-p3_2ss11AT19GT	TRINITY_DN18738_c0_g6	-	-	NA	NA	1226	4.5	NA	NA	2	0	0	101.293	1.0173e-44	7.03524e-44	yes
aqc-MIR166d-p3_2ss11AT19GT	TRINITY_DN18746_c0_g2	nuclear pore complex protein NUP98A isoform X2 [Medicago truncatula]	-	GO:0000973(posttranscriptional tethering of RNA polymerase II gene DNA at nuclear periphery);GO:0003723(RNA binding);GO:0006405(RNA export from nucleus);GO:0006606(protein import into nucleus);GO:0008139(nuclear localization sequence binding);GO:0017056(structural constituent of nuclear pore);GO:0034398(telomere tethering at nuclear periphery);GO:0044614(nuclear pore cytoplasmic filaments)	ko03013(RNA transport)	562	7	NA	4	4	0	30.5633	33.7644	9.1976e-08	9.66516e-08	yes
aqc-MIR166d-p3_2ss11AT19GT	TRINITY_DN18772_c0_g1	xyloglucan galactosyltransferase XLT2 [Medicago truncatula]	XLT2	GO:0003824(catalytic activity);GO:0005794(Golgi apparatus);GO:0008378(galactosyltransferase activity);GO:0009969(xyloglucan biosynthetic process);GO:0016020(membrane)	NA	1102	7.5	NA	4	NA	0	30.5633	0	5.326e-14	6.30988e-14	yes
aqc-MIR166d-p3_2ss11AT19GT	TRINITY_DN18780_c0_g1	unknown [Medicago truncatula]	RBP47B	GO:0003723(RNA binding);GO:0003729(mRNA binding);GO:0005634(nucleus);GO:0005829(cytosol);GO:0006397(mRNA processing);GO:0008143(poly(A) binding);GO:0010494(cytoplasmic stress granule)	ko03013(RNA transport)	395	6	4	NA	NA	40.3388	0	0	3.0257e-18	5.71521e-18	yes
aqc-MIR166d-p3_2ss11AT19GT	TRINITY_DN18780_c0_g1	unknown [Medicago truncatula]	RBP47B	GO:0003723(RNA binding);GO:0003729(mRNA binding);GO:0005634(nucleus);GO:0005829(cytosol);GO:0006397(mRNA processing);GO:0008143(poly(A) binding);GO:0010494(cytoplasmic stress granule)	ko03013(RNA transport)	470	7	NA	4	NA	0	30.5633	0	5.326e-14	6.30988e-14	yes
aqc-MIR166d-p3_2ss11AT19GT	TRINITY_DN18865_c0_g2	hypothetical protein TSUD_68740 [Trifolium subterraneum]	Os05g0446300	GO:0000398(mRNA splicing, via spliceosome);GO:0005681(spliceosomal complex)	ko03040(Spliceosome)	110	10.5	NA	NA	2	0	0	101.293	1.0173e-44	7.03524e-44	yes
aqc-MIR166d-p3_2ss11AT19GT	TRINITY_DN18937_c0_g1	LOW QUALITY PROTEIN: PX domain-containing protein EREL1 [Medicago truncatula]	EREL1	GO:0005768(endosome);GO:0006897(endocytosis);GO:0016050(vesicle organization);GO:0019898(extrinsic component of membrane);GO:0035091(phosphatidylinositol binding)	NA	3718	4.5	4	NA	NA	40.3388	0	0	3.0257e-18	5.71521e-18	yes
aqc-MIR166d-p3_2ss11AT19GT	TRINITY_DN19018_c0_g2	uncharacterized protein ycf23 [Medicago truncatula]	ycf23	NA	NA	405	8.5	2	NA	3	121.017	0	67.5288	3.8454e-26	1.0174e-25	yes
aqc-MIR166d-p3_2ss11AT19GT	TRINITY_DN19039_c0_g1	RING-H2 finger protein ATL8 [Medicago truncatula]	ATL8	GO:0005634(nucleus);GO:0008270(zinc ion binding);GO:0016021(integral component of membrane);GO:0016567(protein ubiquitination);GO:0043161(proteasome-mediated ubiquitin-dependent protein catabolic process);GO:0046872(metal ion binding);GO:0061630(ubiquitin protein ligase activity)	NA	574	9	4	2	4	40.3388	61.1266	33.7644	0.010824	0.0109988	yes
aqc-MIR166d-p3_2ss11AT19GT	TRINITY_DN19099_c0_g1	GEM-like protein 1 [Medicago truncatula]	FIP1	GO:0003674(molecular_function);GO:0008150(biological_process);GO:0009507(chloroplast)	ko04141(Protein processing in endoplasmic reticulum);ko04120(Ubiquitin mediated proteolysis);ko03420(Nucleotide excision repair)	872	8.5	NA	NA	4	0	0	33.7644	2.1684e-15	3.13149e-15	yes
aqc-MIR166d-p3_2ss11AT19GT	TRINITY_DN19136_c0_g1	protein TIFY 3B [Medicago truncatula]	TIFY3B	GO:0003714(transcription corepressor activity);GO:0005634(nucleus);GO:0009611(response to wounding);GO:0031347(regulation of defense response);GO:1903507(negative regulation of nucleic acid-templated transcription);GO:2000022(regulation of jasmonic acid mediated signaling pathway)	ko04075(Plant hormone signal transduction)	542	7.5	NA	NA	2	0	0	236.351	0	0	yes
aqc-MIR166d-p3_2ss11AT19GT	TRINITY_DN19327_c0_g1	dehydrin b [Trifolium repens]	-	GO:0005829(cytosol);GO:0009414(response to water deprivation);GO:0009631(cold acclimation);GO:0009737(response to abscisic acid);GO:0016020(membrane)	NA	472	7	3	2	2	201.694	2017.18	1147.99	0	0	yes
aqc-MIR166d-p3_2ss11AT19GT	TRINITY_DN19484_c0_g1	uncharacterized protein LOC25489409 [Medicago truncatula]	mnmE	GO:0002098(tRNA wobble uridine modification);GO:0003924(GTPase activity);GO:0005525(GTP binding);GO:0005622(intracellular);GO:0005737(cytoplasm);GO:0006400(tRNA modification);GO:0030488(tRNA methylation)	NA	1551	7	4	2	NA	40.3388	91.6898	0	1.4416e-21	3.51602e-21	yes
aqc-MIR166d-p3_2ss11AT19GT	TRINITY_DN19657_c0_g2	protein SHORT-ROOT [Medicago truncatula]	SHR	GO:0003700(DNA binding transcription factor activity);GO:0005634(nucleus);GO:0006355(regulation of transcription, DNA-templated);GO:0008356(asymmetric cell division);GO:0009956(radial pattern formation);GO:0043565(sequence-specific DNA binding);GO:0045930(negative regulation of mitotic cell cycle);GO:0048366(leaf development);GO:0055072(iron ion homeostasis)	ko04075(Plant hormone signal transduction)	376	6	NA	4	NA	0	30.5633	0	5.326e-14	6.30988e-14	yes
aqc-MIR166d-p3_2ss11AT19GT	TRINITY_DN19698_c0_g1	uncharacterized protein LOC11406940 [Medicago truncatula]	tal	GO:0004801(sedoheptulose-7-phosphate:D-glyceraldehyde-3-phosphate glyceronetransferase activity);GO:0005739(mitochondrion);GO:0005829(cytosol);GO:0005975(carbohydrate metabolic process);GO:0006098(pentose-phosphate shunt);GO:0009507(chloroplast);GO:0009536(plastid);GO:0009570(chloroplast stroma);GO:0009809(lignin biosynthetic process);GO:0033587(shikimate biosynthetic process);GO:0046686(response…	ko00030(Pentose phosphate pathway)	403	15.5	NA	4	NA	0	30.5633	0	5.326e-14	6.30988e-14	yes
aqc-MIR166d-p3_2ss11AT19GT	TRINITY_DN19812_c0_g1	hypothetical protein MtrunA17_Chr8g0353581 [Medicago truncatula]	-	GO:0003674(molecular_function);GO:0005634(nucleus);GO:0005737(cytoplasm);GO:0005886(plasma membrane);GO:0009506(plasmodesma);GO:0010118(stomatal movement)	NA	2144	9.5	NA	NA	4	0	0	33.7644	2.1684e-15	3.13149e-15	yes
aqc-MIR166d-p3_2ss11AT19GT	TRINITY_DN19839_c0_g2	photosystem I reaction center subunit N, chloroplastic [Medicago truncatula]	PSAN	GO:0005516(calmodulin binding);GO:0009507(chloroplast);GO:0009522(photosystem I);GO:0009534(chloroplast thylakoid);GO:0009535(chloroplast thylakoid membrane);GO:0009543(chloroplast thylakoid lumen);GO:0009579(thylakoid);GO:0009773(photosynthetic electron transport in photosystem I);GO:0015979(photosynthesis);GO:0030093(chloroplast photosystem I)	ko00195(Photosynthesis)	119	8	3	3	3	161.355	61.1266	168.822	9.0463e-13	1.04437e-12	yes
aqc-MIR166d-p3_2ss11AT19GT	TRINITY_DN19853_c0_g1	NAP1-related protein 2-like [Coffea eugenioides]	-	GO:0003674(molecular_function);GO:0005634(nucleus);GO:0006334(nucleosome assembly)	NA	2068	8.5	2	2	2	201.694	91.6898	101.293	5.5426e-13	6.40786e-13	yes
aqc-MIR166d-p3_2ss11AT19GT	TRINITY_DN20046_c0_g2	receptor-like cytoplasmic kinase 176 [Medicago truncatula]	PBL10	GO:0004675(transmembrane receptor protein serine/threonine kinase activity);GO:0005524(ATP binding);GO:0005886(plasma membrane);GO:0006468(protein phosphorylation);GO:0006952(defense response);GO:0007166(cell surface receptor signaling pathway);GO:0009507(chloroplast);GO:0016301(kinase activity)	NA	186	7.5	NA	4	NA	0	30.5633	0	5.326e-14	6.30988e-14	yes
aqc-MIR166d-p3_2ss11AT19GT	TRINITY_DN20097_c0_g1	mitochondrial import receptor subunit TOM40-1 [Medicago truncatula]	TOM40-1	GO:0005742(mitochondrial outer membrane translocase complex);GO:0030150(protein import into mitochondrial matrix)	NA	826	8	2	NA	NA	121.017	0	0	2.761e-53	2.58192e-52	yes
aqc-MIR166d-p3_2ss11AT19GT	TRINITY_DN20115_c0_g4	unknown [Medicago truncatula]	GAPC1	GO:0003677(DNA binding);GO:0004365(glyceraldehyde-3-phosphate dehydrogenase (NAD+) (phosphorylating) activity);GO:0005507(copper ion binding);GO:0005515(protein binding);GO:0005634(nucleus);GO:0005737(cytoplasm);GO:0005739(mitochondrion);GO:0005740(mitochondrial envelope);GO:0005774(vacuolar membrane);GO:0005794(Golgi apparatus);GO:0005829(cytosol);GO:0005886(plasma membrane);GO:0006094(gluconeog…	ko00010(Glycolysis / Gluconeogenesis);ko00710(Carbon fixation in photosynthetic organisms)	315	5	3	3	3	121.017	152.816	135.058	0.15512	0.156591	yes
aqc-MIR166d-p3_2ss11AT19GT	TRINITY_DN20181_c0_g1	CMV 1a interacting protein [Medicago truncatula]	-	GO:0005768(endosome);GO:0005774(vacuolar membrane);GO:0005802(trans-Golgi network);GO:0008757(S-adenosylmethionine-dependent methyltransferase activity);GO:0032259(methylation)	NA	483	9	NA	4	4	0	30.5633	33.7644	9.1976e-08	9.66516e-08	yes
aqc-MIR166d-p3_2ss11AT19GT	TRINITY_DN20251_c0_g3	abscisic acid receptor PYL8 [Medicago truncatula]	PYL8	GO:0004864(protein phosphatase inhibitor activity);GO:0005634(nucleus);GO:0005737(cytoplasm);GO:0009738(abscisic acid-activated signaling pathway);GO:0010427(abscisic acid binding);GO:0080163(regulation of protein serine/threonine phosphatase activity)	ko04016(MAPK signaling pathway - plant);ko04075(Plant hormone signal transduction)	333	19.5	4	4	NA	40.3388	30.5633	0	7.2896e-09	7.93241e-09	yes
aqc-MIR166d-p3_2ss11AT19GT	TRINITY_DN20272_c0_g1	chloride conductance regulatory protein ICln [Medicago truncatula]	At5g62290	GO:0000387(spliceosomal snRNP assembly);GO:0005216(ion channel activity);GO:0005634(nucleus);GO:0005829(cytosol);GO:0005886(plasma membrane);GO:0006821(chloride transport);GO:0006884(cell volume homeostasis);GO:0034709(methylosome);GO:0034715(pICln-Sm protein complex)	ko03013(RNA transport)	432	6	NA	NA	2	0	0	67.5288	4.6985e-30	1.53517e-29	yes
aqc-MIR166d-p3_2ss11AT19GT	TRINITY_DN20292_c0_g3	LOW QUALITY PROTEIN: E3 ubiquitin-protein ligase KEG [Medicago truncatula]	KEG	GO:0004674(protein serine/threonine kinase activity);GO:0004842(ubiquitin-protein transferase activity);GO:0005769(early endosome);GO:0005802(trans-Golgi network);GO:0006468(protein phosphorylation);GO:0009788(negative regulation of abscisic acid-activated signaling pathway);GO:0045324(late endosome to vacuole transport)	NA	4778	8	NA	NA	2	0	0	67.5288	4.6985e-30	1.53517e-29	yes
aqc-MIR166d-p3_2ss11AT19GT	TRINITY_DN20292_c0_g3	LOW QUALITY PROTEIN: E3 ubiquitin-protein ligase KEG [Medicago truncatula]	KEG	GO:0004674(protein serine/threonine kinase activity);GO:0004842(ubiquitin-protein transferase activity);GO:0005769(early endosome);GO:0005802(trans-Golgi network);GO:0006468(protein phosphorylation);GO:0009788(negative regulation of abscisic acid-activated signaling pathway);GO:0045324(late endosome to vacuole transport)	NA	5103	7	NA	2	NA	0	61.1266	0	2.8349e-27	7.6679e-27	yes
aqc-MIR166d-p3_2ss11AT19GT	TRINITY_DN20349_c0_g1	phosphogluco-mutase [Medicago truncatula]	PGMP	GO:0004614(phosphoglucomutase activity);GO:0005829(cytosol);GO:0005978(glycogen biosynthetic process);GO:0006006(glucose metabolic process);GO:0009570(chloroplast stroma);GO:0009590(detection of gravity);GO:0010319(stromule);GO:0019252(starch biosynthetic process);GO:0019388(galactose catabolic process)	ko00010(Glycolysis / Gluconeogenesis);ko00030(Pentose phosphate pathway);ko00052(Galactose metabolism);ko00500(Starch and sucrose metabolism);ko00520(Amino sugar and nucleotide sugar metabolism);ko00230(Purine metabolism)	443	6.5	NA	NA	2	0	0	168.822	4.758e-74	1.04621e-72	yes
aqc-MIR166d-p3_2ss11AT19GT	TRINITY_DN20559_c1_g2	CBL-interacting serine/threonine-protein kinase 6 [Medicago truncatula]	CIPK6	GO:0004674(protein serine/threonine kinase activity);GO:0005515(protein binding);GO:0005524(ATP binding);GO:0005622(intracellular);GO:0005783(endoplasmic reticulum);GO:0005886(plasma membrane);GO:0007275(multicellular organism development);GO:0009414(response to water deprivation);GO:0009651(response to salt stress);GO:0010540(basipetal auxin transport);GO:0016301(kinase activity);GO:0018105(pept…	NA	187	8.5	NA	3	3	0	213.943	202.586	4.664e-46	3.91474e-45	yes
aqc-MIR166d-p3_2ss11AT19GT	TRINITY_DN20678_c0_g2	DNA-binding protein DF1 [Pisum sativum]	GT-2	GO:0003700(DNA binding transcription factor activity);GO:0005634(nucleus);GO:0006355(regulation of transcription, DNA-templated);GO:0010192(mucilage biosynthetic process);GO:0019760(glucosinolate metabolic process);GO:0043565(sequence-specific DNA binding);GO:0044212(transcription regulatory region DNA binding)	NA	49	6	NA	3	NA	0	61.1266	0	2.8349e-27	7.6679e-27	yes
aqc-MIR166d-p3_2ss11AT19GT	TRINITY_DN20680_c0_g2	mRNA decay activator protein ZFP36 isoform X1 [Medicago truncatula]	-	GO:0003674(molecular_function);GO:0005634(nucleus);GO:0008150(biological_process)	NA	659	9	NA	4	NA	0	30.5633	0	5.326e-14	6.30988e-14	yes
aqc-MIR166d-p3_2ss11AT19GT	TRINITY_DN20917_c0_g1	uncharacterized protein At2g37660, chloroplastic [Medicago truncatula]	-	NA	NA	303	7	NA	3	4	0	152.816	33.7644	9.9189e-46	8.11611e-45	yes
aqc-MIR166d-p3_2ss11AT19GT	TRINITY_DN21053_c0_g2	sulfite exporter TauE/SafE family protein 3 [Medicago truncatula]	-	GO:0009507(chloroplast);GO:0016021(integral component of membrane)	NA	968	8.5	2	NA	NA	80.6777	0	0	9.1449e-36	4.07513e-35	yes
aqc-MIR166d-p3_2ss11AT19GT	TRINITY_DN21089_c0_g1	subtilisin-like protease SBT1.7 [Medicago truncatula]	SBT1.7	GO:0004252(serine-type endopeptidase activity);GO:0005618(cell wall)	NA	1504	8	4	NA	NA	40.3388	0	0	3.0257e-18	5.71521e-18	yes
aqc-MIR166d-p3_2ss11AT19GT	TRINITY_DN21364_c0_g1	COBW domain-containing protein 1-like [Cicer arietinum]	CBWD1	GO:0009295(nucleoid);GO:0009507(chloroplast);GO:0009508(plastid chromosome);GO:0009570(chloroplast stroma)	NA	547	18.5	4	3	2	40.3388	91.6898	202.586	1.6672e-27	5.29838e-27	yes
aqc-MIR166d-p3_2ss11AT19GT	TRINITY_DN21410_c1_g4	WD and tetratricopeptide repeats protein 1 [Medicago truncatula]	Wdtc1	GO:0000166(nucleotide binding);GO:0005515(protein binding);GO:0005634(nucleus);GO:0005737(cytoplasm);GO:0005829(cytosol);GO:0005886(plasma membrane);GO:0009506(plasmodesma);GO:0045717(negative regulation of fatty acid biosynthetic process);GO:0080008(Cul4-RING E3 ubiquitin ligase complex)	NA	125	9	NA	2	NA	0	61.1266	0	2.8349e-27	7.6679e-27	yes
aqc-MIR166d-p3_2ss11AT19GT	TRINITY_DN21434_c0_g1	calmodulin-binding heat-shock protein [Medicago truncatula]	-	GO:0004806(triglyceride lipase activity);GO:0005516(calmodulin binding);GO:0005576(extracellular region);GO:0006629(lipid metabolic process);GO:0016042(lipid catabolic process);GO:0016787(hydrolase activity)	NA	1134	7	NA	NA	4	0	0	33.7644	2.1684e-15	3.13149e-15	yes
aqc-MIR166d-p3_2ss11AT19GT	TRINITY_DN21458_c1_g3	uncharacterized protein LOC11446401 [Medicago truncatula]	BCE_1625	GO:0003723(RNA binding);GO:0005730(nucleolus);GO:0032040(small-subunit processome)	ko03010(Ribosome)	785	6	NA	NA	4	0	0	33.7644	2.1684e-15	3.13149e-15	yes
aqc-MIR166d-p3_2ss11AT19GT	TRINITY_DN21582_c0_g3	probable WRKY transcription factor 17 [Medicago truncatula]	WRKY17	GO:0003700(DNA binding transcription factor activity);GO:0005516(calmodulin binding);GO:0005634(nucleus);GO:0006351(transcription, DNA-templated);GO:0006355(regulation of transcription, DNA-templated);GO:0010200(response to chitin);GO:0042742(defense response to bacterium);GO:0043565(sequence-specific DNA binding)	ko04016(MAPK signaling pathway - plant);ko04626(Plant-pathogen interaction)	526	12	NA	4	NA	0	30.5633	0	5.326e-14	6.30988e-14	yes
aqc-MIR166d-p3_2ss11AT19GT	TRINITY_DN21621_c0_g1	galactinol synthase [Medicago sativa]	GOLS2	GO:0005737(cytoplasm);GO:0006012(galactose metabolic process);GO:0006979(response to oxidative stress);GO:0009408(response to heat);GO:0009409(response to cold);GO:0009414(response to water deprivation);GO:0009644(response to high light intensity);GO:0009651(response to salt stress);GO:0009737(response to abscisic acid);GO:0016051(carbohydrate biosynthetic process);GO:0016758(transferase activity…	ko00052(Galactose metabolism)	570	8	NA	4	2	0	30.5633	67.5288	6.4851e-16	1.17172e-15	yes
aqc-MIR166d-p3_2ss11AT19GT	TRINITY_DN21717_c1_g1	neutral/alkaline invertase 3, chloroplastic [Medicago truncatula]	INVE	GO:0004564(beta-fructofuranosidase activity);GO:0004575(sucrose alpha-glucosidase activity);GO:0005982(starch metabolic process);GO:0005987(sucrose catabolic process);GO:0009507(chloroplast);GO:0033926(glycopeptide alpha-N-acetylgalactosaminidase activity);GO:0048825(cotyledon development)	ko03010(Ribosome)	1843	11	NA	4	NA	0	30.5633	0	5.326e-14	6.30988e-14	yes
aqc-MIR166d-p3_2ss11AT19GT	TRINITY_DN21749_c0_g2	fumarate hydratase 1, mitochondrial [Medicago truncatula]	FUM1	GO:0004333(fumarate hydratase activity);GO:0005739(mitochondrion);GO:0005829(cytosol);GO:0006099(tricarboxylic acid cycle);GO:0006106(fumarate metabolic process);GO:0006108(malate metabolic process);GO:0051262(protein tetramerization)	ko00020(Citrate cycle (TCA cycle));ko00620(Pyruvate metabolism)	942	6.5	NA	NA	4	0	0	33.7644	2.1684e-15	3.13149e-15	yes
aqc-MIR166d-p3_2ss11AT19GT	TRINITY_DN21961_c0_g1	cytochrome b6-f complex iron-sulfur subunit, chloroplastic [Medicago truncatula]	petC	GO:0005515(protein binding);GO:0005886(plasma membrane);GO:0009496(plastoquinol--plastocyanin reductase activity);GO:0009507(chloroplast);GO:0009512(cytochrome b6f complex);GO:0009534(chloroplast thylakoid);GO:0009535(chloroplast thylakoid membrane);GO:0009579(thylakoid);GO:0009767(photosynthetic electron transport chain);GO:0009941(chloroplast envelope);GO:0010196(nonphotochemical quenching);GO:…	ko00195(Photosynthesis)	257	13.5	2	2	2	484.066	458.449	877.874	2.5926e-40	1.4914e-39	yes
aqc-MIR166d-p3_2ss11AT19GT	TRINITY_DN22091_c0_g1	riboflavin biosynthesis protein PYRR, chloroplastic isoform X1 [Medicago truncatula]	PYRR	GO:0009451(RNA modification);GO:0019239(deaminase activity)	ko00740(Riboflavin metabolism)	1927	6.5	NA	4	NA	0	30.5633	0	5.326e-14	6.30988e-14	yes
aqc-MIR166d-p3_2ss11AT19GT	TRINITY_DN22252_c1_g2	protein kinase [Medicago sativa]	CPK19	GO:0004683(calmodulin-dependent protein kinase activity);GO:0005516(calmodulin binding);GO:0005634(nucleus);GO:0005737(cytoplasm);GO:0009738(abscisic acid-activated signaling pathway);GO:0009931(calcium-dependent protein serine/threonine kinase activity);GO:0018105(peptidyl-serine phosphorylation);GO:0035556(intracellular signal transduction);GO:0046777(protein autophosphorylation)	ko04626(Plant-pathogen interaction)	1092	9.5	NA	2	NA	0	61.1266	0	2.8349e-27	7.6679e-27	yes
aqc-MIR166d-p3_2ss11AT19GT	TRINITY_DN22269_c0_g1	putative peptidase M1, membrane alanine aminopeptidase [Medicago truncatula]	TAF2	GO:0003682(chromatin binding);GO:0005669(transcription factor TFIID complex);GO:0043565(sequence-specific DNA binding);GO:0044212(transcription regulatory region DNA binding);GO:0045944(positive regulation of transcription by RNA polymerase II)	ko03022(Basal transcription factors)	1206	7.5	NA	NA	4	0	0	33.7644	2.1684e-15	3.13149e-15	yes
aqc-MIR166d-p3_2ss11AT19GT	TRINITY_DN22360_c1_g2	pumilio homolog 24 isoform X1 [Medicago truncatula]	APUM24	GO:0003729(mRNA binding);GO:0005730(nucleolus);GO:0006417(regulation of translation)	NA	1696	6.5	NA	NA	4	0	0	33.7644	2.1684e-15	3.13149e-15	yes
aqc-MIR166d-p3_2ss11AT19GT	TRINITY_DN22370_c0_g1	60S ribosomal protein L7a-2 [Medicago truncatula]	RPL7AB	GO:0000470(maturation of LSU-rRNA);GO:0003723(RNA binding);GO:0006412(translation);GO:0022625(cytosolic large ribosomal subunit)	ko03010(Ribosome)	15	7.5	3	NA	2	80.6777	0	135.058	1.2884e-28	4.14779e-28	yes
aqc-MIR166d-p3_2ss11AT19GT	TRINITY_DN22554_c0_g1	hypothetical protein TSUD_129630 [Trifolium subterraneum]	SUMO1	GO:0005634(nucleus);GO:0016925(protein sumoylation);GO:0031386(protein tag)	ko03013(RNA transport)	514	11.5	4	2	3	40.3388	152.816	168.822	2.2484e-18	5.12083e-18	yes
aqc-MIR166d-p3_2ss11AT19GT	TRINITY_DN22633_c1_g3	probable glutathione S-transferase [Medicago truncatula]	HSP26-A	GO:0004364(glutathione transferase activity);GO:0005737(cytoplasm);GO:0006749(glutathione metabolic process);GO:0009407(toxin catabolic process)	ko00480(Glutathione metabolism)	399	7.5	NA	NA	4	0	0	33.7644	2.1684e-15	3.13149e-15	yes
aqc-MIR166d-p3_2ss11AT19GT	TRINITY_DN22789_c0_g1	serine/threonine-protein kinase PCRK1 isoform X1 [Medicago truncatula]	PBL19	GO:0002221(pattern recognition receptor signaling pathway);GO:0004675(transmembrane receptor protein serine/threonine kinase activity);GO:0005515(protein binding);GO:0005524(ATP binding);GO:0005886(plasma membrane);GO:0006468(protein phosphorylation);GO:0007166(cell surface receptor signaling pathway);GO:0009617(response to bacterium);GO:0016301(kinase activity);GO:0042742(defense response to bac…	NA	1851	6	NA	2	4	0	91.6898	33.7644	4.639e-23	1.16692e-22	yes
aqc-MIR166d-p3_2ss11AT19GT	TRINITY_DN22885_c1_g1	glucose-1-phosphate adenylyltransferase large subunit 3, chloroplastic/amyloplastic [Medicago truncatula]	ADG2	GO:0005524(ATP binding);GO:0005978(glycogen biosynthetic process);GO:0008878(glucose-1-phosphate adenylyltransferase activity);GO:0009507(chloroplast);GO:0009570(chloroplast stroma);GO:0009941(chloroplast envelope);GO:0019252(starch biosynthetic process)	ko00500(Starch and sucrose metabolism);ko00520(Amino sugar and nucleotide sugar metabolism)	235	7	NA	3	NA	0	91.6898	0	1.508e-40	8.68797e-40	yes
aqc-MIR166d-p3_2ss11AT19GT	TRINITY_DN22893_c0_g1	protein SIEVE ELEMENT OCCLUSION B [Medicago truncatula]	SEOB	GO:0005634(nucleus);GO:0010088(phloem development);GO:0042803(protein homodimerization activity);GO:0043621(protein self-association)	NA	854	6	4	3	4	40.3388	61.1266	33.7644	0.010824	0.0109988	yes
aqc-MIR166d-p3_2ss11AT19GT	TRINITY_DN22941_c0_g3	hypothetical protein Ahy_A04g021317 [Arachis hypogaea]	-	GO:0004356(glutamate-ammonia ligase activity)	ko00630(Glyoxylate and dicarboxylate metabolism);ko00910(Nitrogen metabolism);ko00250(Alanine, aspartate and glutamate metabolism);ko00220(Arginine biosynthesis)	352	5.5	2	2	2	242.033	427.886	405.173	3.4599e-13	4.03732e-13	yes
aqc-MIR166d-p3_2ss11AT19GT	TRINITY_DN22942_c2_g3	PsbB mRNA maturation factor Mbb1 [Medicago truncatula]	HCF107	GO:0003727(single-stranded RNA binding);GO:0005634(nucleus);GO:0005774(vacuolar membrane);GO:0006396(RNA processing);GO:0006397(mRNA processing);GO:0006417(regulation of translation);GO:0009507(chloroplast);GO:0009570(chloroplast stroma);GO:0009657(plastid organization);GO:0009941(chloroplast envelope);GO:0010114(response to red light);GO:0031969(chloroplast membrane);GO:0043621(protein self-asso…	NA	369	5.5	NA	4	NA	0	30.5633	0	5.326e-14	6.30988e-14	yes
aqc-MIR166d-p3_2ss11AT19GT	TRINITY_DN23261_c0_g1	proteasome subunit beta type-7-B [Medicago truncatula]	PBB2	GO:0000502(proteasome complex);GO:0004298(threonine-type endopeptidase activity);GO:0005634(nucleus);GO:0005737(cytoplasm);GO:0005839(proteasome core complex);GO:0006511(ubiquitin-dependent protein catabolic process);GO:0008233(peptidase activity);GO:0010499(proteasomal ubiquitin-independent protein catabolic process);GO:0051603(proteolysis involved in cellular protein catabolic process)	ko03050(Proteasome)	514	16.5	2	4	2	282.372	30.5633	202.586	1.375e-42	9.24513e-42	yes
aqc-MIR166d-p3_2ss11AT19GT	TRINITY_DN23268_c0_g1	serine/threonine-protein kinase dst2 isoform X2 [Medicago truncatula]	dst1	GO:0005737(cytoplasm)	NA	410	12.5	2	4	NA	80.6777	30.5633	0	3.6961e-20	8.81092e-20	yes
aqc-MIR166d-p3_2ss11AT19GT	TRINITY_DN23461_c0_g1	alpha-L-fucosidase 1 [Medicago truncatula]	FUC1	GO:0005773(vacuole)	ko00511(Other glycan degradation)	906	12.5	4	NA	4	40.3388	0	33.7644	5.8097e-09	6.43576e-09	yes
[truncated: 10,297 more rows]
