# Supplementary material for: Utilization of Transcriptome, Small RNA, and Degradome Sequencing to Provide Insights Into Drought Stress and Rewatering Treatment in Medicago ruthenica
Source: Front Plant Sci. 2021 Aug 3;12:675903. doi: 10.3389/fpls.2021.675903 (PMC8369265; doi:10.3389/fpls.2021.675903)
Supplement: Supplementary file 9 [file Table_9.XLSX]

## Sheet: Sheet1
miR_name	Transcript	Transcript Annotation	Symbol	GO_Term	KEGG_Pathway	TSlice	AllenScore	DegradomeCategory(CK)	DegradomeCategory(DS)	DegradomeCategory(RW)	DegradomeNormReads(CK)	DegradomeNormReads(DS)	DegradomeNormReads(RW)	pvalue	qvalue	significant
PC-3p-112962_35	TRINITY_DN22115_c0_g1	putative ribonuclease H-like domain, reverse transcriptase zinc-binding domain-containing protein [Medicago truncatula]	-	GO:0003676(nucleic acid binding);GO:0003964(RNA-directed DNA polymerase activity);GO:0005739(mitochondrion);GO:0008150(biological_process)	NA(NA)	318	3	NA	4	NA	0	30.56	0	0	0	yes
PC-3p-112962_35	TRINITY_DN22115_c0_g1	putative ribonuclease H-like domain, reverse transcriptase zinc-binding domain-containing protein [Medicago truncatula]	-	GO:0003676(nucleic acid binding);GO:0003964(RNA-directed DNA polymerase activity);GO:0005739(mitochondrion);GO:0008150(biological_process)	NA(NA)	344	0	NA	4	2	0	30.56	101.29	0	0	yes
PC-3p-15383_407	TRINITY_DN18814_c0_g3	-	-	-	-	383	3	NA	NA	4	0	0	33.76	0	0	yes
PC-3p-242522_11	TRINITY_DN26158_c1_g2	aspartic proteinase PCS1 [Medicago truncatula]	PCS1	GO:0004190(aspartic-type endopeptidase activity);GO:0006508(proteolysis);GO:0030163(protein catabolic process)	-	649	1	NA	NA	3	0	0	67.53	0	0	yes
PC-3p-39042_145	TRINITY_DN21145_c0_g2	-	-	-	-	25	1	4	2	4	40.34	152.82	33.76	0	0	yes
PC-3p-39042_145	TRINITY_DN25293_c1_g2	putative reverse transcriptase, RNA-dependent DNA polymerase [Medicago truncatula]	PRB1	GO:0003674(molecular_function);GO:0005576(extracellular region);GO:0008150(biological_process)	mtr04016(MAPK signaling pathway - plant);mtr04075(Plant hormone signal transduction);mtr04626(Plant-pathogen interaction)	367	0	3	NA	NA	80.68	0	0	0	0	yes
PC-3p-54_81480	TRINITY_DN21777_c0_g1	chorismate synthase 1, chloroplastic [Medicago truncatula]	CS1	GO:0004107(chorismate synthase activity);GO:0005829(cytosol);GO:0009073(aromatic amino acid family biosynthetic process);GO:0009423(chorismate biosynthetic process);GO:0010181(FMN binding)	mtr00400(Phenylalanine, tyrosine and tryptophan biosynthesis)	395	3	2	2	NA	242.03	122.25	0	0	0	yes
PC-3p-54_81480	TRINITY_DN22875_c1_g3	-	-	-	-	35	2	3	0	2	80.68	641.83	303.88	0	0	yes
PC-3p-54_81480	TRINITY_DN25233_c0_g8	F-box/kelch-repeat protein At3g06240 [Medicago truncatula]	At3g06240	GO:0004842(ubiquitin-protein transferase activity);GO:0019005(SCF ubiquitin ligase complex);GO:0031146(SCF-dependent proteasomal ubiquitin-dependent protein catabolic process)	NA(NA)	168	2	0	0	0	1129.49	764.08	607.76	0	0	yes
PC-3p-78936_58	TRINITY_DN22811_c0_g2	hypothetical protein GOBAR_DD28494 [Gossypium barbadense]	-	-	nto00230(Purine metabolism);nto00240(Pyrimidine metabolism);nto03020(RNA polymerase)	203	3.5	2	2	2	21621.6	23503.2	3747.85	0	0	yes
PC-3p-83362_54	TRINITY_DN22199_c1_g1	BAG family molecular chaperone regulator [Medicago truncatula]	BAG3	GO:0005634(nucleus);GO:0051087(chaperone binding)	gmx04141(Protein processing in endoplasmic reticulum)	444	3	NA	NA	4	0	0	33.76	0	0	yes
PC-3p-905_4408	TRINITY_DN12908_c0_g3	-	-	-	-	224	1	NA	NA	4	0	0	33.76	0	0	yes
PC-5p-39746_142	TRINITY_DN17503_c0_g1	protein NRT1/ PTR FAMILY 2.9 [Medicago truncatula]	NPF2.11	GO:0005215(transporter activity);GO:0005886(plasma membrane);GO:0006857(oligopeptide transport);GO:0009506(plasmodesma);GO:0016020(membrane);GO:0016021(integral component of membrane);GO:0055085(transmembrane transport);GO:0080167(response to karrikin);GO:0090448(glucosinolate:proton symporter activity);GO:0090449(phloem glucosinolate loading);GO:1901349(glucosinolate transport)	NA(NA)	1411	3	NA	NA	2	0	0	67.53	0	0	yes
PC-5p-39746_142	TRINITY_DN21125_c0_g1	polygalacturonase 1 beta-like protein 3 [Medicago truncatula]	PGL3	GO:0004650(polygalacturonase activity);GO:0005576(extracellular region);GO:0005618(cell wall);GO:0008150(biological_process);GO:0048046(apoplast)	bvg04144(Endocytosis)	1594	2.5	2	NA	2	121.02	0	67.53	0	0	yes
PC-5p-400_9674	TRINITY_DN11605_c0_g1	germin-like protein subfamily 3 member 2 [Medicago truncatula]	At3g10080	GO:0005618(cell wall);GO:0033609(oxalate metabolic process);GO:0046564(oxalate decarboxylase activity)	-	630	3	2	2	NA	121.02	91.69	0	0	0	yes
PC-5p-9773_636	TRINITY_DN12908_c0_g3	-	-	-	-	313	0.5	2	0	0	564.74	519.58	540.23	0.39	0.39	yes
PC-5p-9773_636	TRINITY_DN21123_c0_g6	albumin I [Medicago truncatula]	LEG1	-	-	168	3	0	1	NA	403.39	183.38	0	0	0	yes
PC-5p-9773_636	TRINITY_DN24607_c1_g2	uncharacterized protein LOC25487276 isoform X2 [Medicago truncatula]	-	-	-	1233	3	NA	4	NA	0	30.56	0	0	0	yes
aly-miR2111a-5p_1ss19TG	TRINITY_DN23711_c0_g2	F-box/kelch-repeat protein At3g27150 [Medicago truncatula]	At3g27150	GO:0004842(ubiquitin-protein transferase activity);GO:0031463(Cul3-RING ubiquitin ligase complex)	-	191	2.5	0	4	1	282.37	30.56	168.82	0	0	yes
aqc-MIR166d-p3_2ss11AT19GT	TRINITY_DN15250_c0_g1	uncharacterized protein LOC11439344 isoform X1 [Medicago truncatula]	-	GO:0005737(cytoplasm);GO:0009507(chloroplast)	NA(NA)	1154	3.5	2	4	2	80.68	30.56	101.29	0	0	yes
ath-miR159c_L+1R-1_1ss2TA	TRINITY_DN12590_c0_g1	putative ricin B, lectin domain-containing protein [Medicago truncatula]	EULS3	GO:0005515(protein binding);GO:0005634(nucleus);GO:0005737(cytoplasm);GO:0030246(carbohydrate binding);GO:0042742(defense response to bacterium);GO:0090332(stomatal closure)	-	89	3.5	NA	2	NA	0	61.13	0	0	0	yes
ath-miR8175_L-2_1ss12AG	TRINITY_DN20679_c0_g1	uncharacterized protein LOC25489365 [Medicago truncatula]	-	GO:0003674(molecular_function);GO:0005634(nucleus);GO:0008150(biological_process)	egr04144(Endocytosis)	957	3.5	NA	NA	4	0	0	33.76	0	0	yes
cme-miR156e_L-1R+1	TRINITY_DN15141_c0_g3	PREDICTED: squamosa promoter-binding-like protein 3 [Lupinus angustifolius]	SPL13	GO:0003677(DNA binding);GO:0003700(DNA binding transcription factor activity);GO:0005634(nucleus);GO:0005737(cytoplasm);GO:0006351(transcription, DNA-templated);GO:0006355(regulation of transcription, DNA-templated);GO:0010321(regulation of vegetative phase change);GO:0046872(metal ion binding)	-	2033	2.5	4	NA	NA	40.34	0	0	0	0	yes
cme-miR156e_L-1R+1	TRINITY_DN22590_c0_g2	squamosa promoter-binding-like protein 13A [Medicago truncatula]	TGA1	GO:0003677(DNA binding);GO:0003700(DNA binding transcription factor activity);GO:0005634(nucleus);GO:0006355(regulation of transcription, DNA-templated);GO:0048653(anther development)	NA(NA)	1158	0.5	NA	4	NA	0	30.56	0	0	0	yes
cme-miR159b_L+1R-1	TRINITY_DN12590_c0_g1	putative ricin B, lectin domain-containing protein [Medicago truncatula]	EULS3	GO:0005515(protein binding);GO:0005634(nucleus);GO:0005737(cytoplasm);GO:0030246(carbohydrate binding);GO:0042742(defense response to bacterium);GO:0090332(stomatal closure)	-	89	3.5	2	NA	NA	121.02	0	0	0	0	yes
cme-miR164a	TRINITY_DN13674_c0_g1	NAC domain-containing protein 21/22 [Medicago truncatula]	NAC021	GO:0003677(DNA binding);GO:0003700(DNA binding transcription factor activity);GO:0005634(nucleus);GO:0006351(transcription, DNA-templated);GO:0006355(regulation of transcription, DNA-templated);GO:0007275(multicellular organism development);GO:0009734(auxin-activated signaling pathway);GO:0010072(primary shoot apical meristem specification);GO:0048527(lateral root development)	NA(NA)	701	1	0	0	0	1371.52	458.45	3781.61	0	0	yes
cme-miR164a	TRINITY_DN23959_c0_g5	NAC domain-containing protein 100 [Medicago truncatula]	NAC100	GO:0003677(DNA binding);GO:0003700(DNA binding transcription factor activity);GO:0005634(nucleus);GO:0006351(transcription, DNA-templated);GO:0006355(regulation of transcription, DNA-templated);GO:0007275(multicellular organism development)	fve03013(RNA transport);fve03015(mRNA surveillance pathway);fve03018(RNA degradation)	721	3	1	NA	NA	80.68	0	0	0	0	yes
csi-MIR156c-p5_2ss3TA18TG	TRINITY_DN20292_c0_g2	formyltetrahydrofolate deformylase 1, mitochondrial [Medicago truncatula]	PURU1	GO:0005739(mitochondrion);GO:0006189('de novo' IMP biosynthetic process);GO:0006730(one-carbon metabolic process);GO:0008864(formyltetrahydrofolate deformylase activity);GO:0009058(biosynthetic process);GO:0009152(purine ribonucleotide biosynthetic process);GO:0009853(photorespiration);GO:0016742(hydroxymethyl-, formyl- and related transferase activity);GO:0046653(tetrahydrofolate metabolic proce…	mtr00630(Glyoxylate and dicarboxylate metabolism);mtr00670(One carbon pool by folate)	224	3.5	NA	NA	2	0	0	135.06	0	0	yes
csi-miR160c-5p_1ss19CT	TRINITY_DN21946_c0_g3	putative transcription factor ARF family [Medicago truncatula]	-	-	-	33	0.5	0	0	0	3428.8	2414.5	3376.44	0	0	yes
csi-miR167c-3p_L+2R-2	TRINITY_DN19463_c0_g1	zinc finger C-x8-C-x5-C-x3-H type family protein, putative [Medicago truncatula]	At3g21810	GO:0003676(nucleic acid binding);GO:0003677(DNA binding);GO:0005515(protein binding);GO:0005634(nucleus);GO:0008150(biological_process);GO:0046872(metal ion binding)	-	2304	3	2	4	2	201.69	30.56	101.29	0	0	yes
gma-MIR10423-p3_1ss3AC	TRINITY_DN15435_c0_g3	transmembrane and coiled-coil domain-containing protein 4 [Medicago truncatula]	TMCO4	GO:0003674(molecular_function);GO:0008150(biological_process);GO:0009507(chloroplast);GO:0016021(integral component of membrane)	-	1701	3.5	NA	NA	2	0	0	67.53	0	0	yes
gma-MIR10423-p3_1ss3AC	TRINITY_DN15703_c0_g1	ATP sulfurylase 1, chloroplastic [Medicago truncatula]	APS1	GO:0000103(sulfate assimilation);GO:0004020(adenylylsulfate kinase activity)	mtr00920(Sulfur metabolism);mtr00230(Purine metabolism);mtr00450(Selenocompound metabolism);mtr00261(Monobactam biosynthesis)	469	3	2	2	NA	403.39	213.94	0	0	0	yes
gma-MIR10423-p3_1ss3AC	TRINITY_DN18320_c0_g1	putative tripeptidyl-peptidase II [Medicago truncatula]	TPP2	GO:0004252(serine-type endopeptidase activity)	NA(NA)	2348	2.5	2	2	2	282.37	122.25	135.06	0	0	yes
gma-MIR10423-p3_1ss3AC	TRINITY_DN19359_c0_g1	uncharacterized protein LOC25490226 [Medicago truncatula]	-	GO:0005768(endosome);GO:0005794(Golgi apparatus);GO:0005802(trans-Golgi network);GO:0016021(integral component of membrane);GO:0016740(transferase activity);GO:0016757(transferase activity, transferring glycosyl groups)	-	446	3.5	NA	4	NA	0	30.56	0	0	0	yes
gma-MIR10423-p3_1ss3AC	TRINITY_DN21506_c0_g1	unknown [Medicago truncatula]	SPCC1235.04c	GO:0005737(cytoplasm);GO:0016740(transferase activity)	nnu00740(Riboflavin metabolism)	2428	3	NA	NA	4	0	0	33.76	0	0	yes
gma-MIR10423-p3_1ss3AC	TRINITY_DN24932_c0_g1	glycine--tRNA ligase, mitochondrial 1-like [Cicer arietinum]	At1g29880	GO:0004820(glycine-tRNA ligase activity);GO:0005737(cytoplasm);GO:0006426(glycyl-tRNA aminoacylation)	cam00970(Aminoacyl-tRNA biosynthesis)	1201	3	4	2	NA	40.34	61.13	0	0	0	yes
gma-MIR10423-p5_1ss3AC	TRINITY_DN15703_c0_g1	ATP sulfurylase 1, chloroplastic [Medicago truncatula]	APS1	GO:0000103(sulfate assimilation);GO:0004020(adenylylsulfate kinase activity)	mtr00920(Sulfur metabolism);mtr00230(Purine metabolism);mtr00450(Selenocompound metabolism);mtr00261(Monobactam biosynthesis)	469	3	NA	NA	2	0	0	337.64	0	0	yes
gma-MIR10423-p5_1ss3AC	TRINITY_DN25233_c0_g8	F-box/kelch-repeat protein At3g06240 [Medicago truncatula]	At3g06240	GO:0004842(ubiquitin-protein transferase activity);GO:0019005(SCF ubiquitin ligase complex);GO:0031146(SCF-dependent proteasomal ubiquitin-dependent protein catabolic process)	NA(NA)	585	3.5	3	NA	NA	80.68	0	0	0	0	yes
gma-MIR1527-p3_1ss23CG	TRINITY_DN25368_c0_g1	hypothetical protein MTR_2g436990 [Medicago truncatula]	-	-	-	48	0	NA	NA	1	0	0	67.53	0	0	yes
gma-MIR1527-p3_2ss17AG18AG	TRINITY_DN17164_c1_g2	molybdenum cofactor sulfurase [Medicago truncatula]	FLACCA	GO:0016740(transferase activity)	ghi00790(Folate biosynthesis)	1571	3.5	NA	4	NA	0	30.56	0	0	0	yes
gma-MIR1527-p3_2ss2CT22TA	TRINITY_DN23108_c0_g1	-	-	-	-	20	0	NA	NA	0	0	0	101.29	0	0	yes
gma-MIR1527-p3_2ss2CT22TA	TRINITY_DN26284_c0_g1	putative receptor-like protein kinase At4g00960 isoform X1 [Medicago truncatula]	CRK31	GO:0004674(protein serine/threonine kinase activity);GO:0005886(plasma membrane);GO:0006468(protein phosphorylation);GO:0006952(defense response);GO:0009506(plasmodesma)	NA(NA)	883	0	NA	2	NA	0	91.69	0	0	0	yes
gma-MIR1527-p5_1ss18TA_2	TRINITY_DN26284_c0_g1	putative receptor-like protein kinase At4g00960 isoform X1 [Medicago truncatula]	CRK31	GO:0004674(protein serine/threonine kinase activity);GO:0005886(plasma membrane);GO:0006468(protein phosphorylation);GO:0006952(defense response);GO:0009506(plasmodesma)	NA(NA)	879	0	NA	NA	0	0	0	168.82	0	0	yes
gma-MIR1527-p5_1ss7AT	TRINITY_DN13919_c0_g5	putative aminoacyltransferase, E1 ubiquitin-activating enzyme [Medicago truncatula]	UBC25	GO:0005737(cytoplasm);GO:0031625(ubiquitin protein ligase binding);GO:0061630(ubiquitin protein ligase activity)	lang04120(Ubiquitin mediated proteolysis)	111	0	NA	NA	1	0	0	67.53	0	0	yes
gma-MIR1527-p5_1ss7AT	TRINITY_DN25735_c0_g1	-	-	-	-	40	0.5	4	NA	NA	40.34	0	0	0	0	yes
gma-MIR4995-p3_1ss21GA	TRINITY_DN15984_c0_g1	OTU domain-containing protein 3 isoform X2 [Medicago truncatula]	Otud3	GO:0005634(nucleus);GO:0005737(cytoplasm);GO:0006508(proteolysis);GO:0008234(cysteine-type peptidase activity)	NA(NA)	1320	3.5	NA	NA	2	0	0	101.29	0	0	yes
gma-MIR5368-p5_1ss1TC	TRINITY_DN25308_c0_g1	mitogen-activated protein kinase 20 [Medicago truncatula]	MPK10	GO:0004707(MAP kinase activity);GO:0005515(protein binding);GO:0005524(ATP binding);GO:0005634(nucleus);GO:0005737(cytoplasm);GO:0007165(signal transduction);GO:0010468(regulation of gene expression)	zju04016(MAPK signaling pathway - plant)	2384	3.5	4	NA	2	40.34	0	168.82	0	0	yes
gma-MIR5767-p5_2ss6AG22TA	TRINITY_DN15392_c2_g1	PPR repeat protein [Medicago truncatula]	-	-	-	283	1.5	0	0	4	322.71	122.25	33.76	0	0	yes
gma-MIR5767-p5_2ss6AG22TA	TRINITY_DN21051_c0_g1	-	-	-	-	42	1.5	2	2	2	2460.67	947.46	1519.4	0	0	yes
gma-MIR5767-p5_2ss6AG22TA	TRINITY_DN21051_c0_g4	hypothetical protein MTR_1g041545 [Medicago truncatula]	-	GO:0070847(core mediator complex)	NA(NA)	520	0.5	NA	NA	0	0	0	101.29	0	0	yes
gma-miR1509a_R-3_1ss8AC	TRINITY_DN13145_c0_g2	GATA zinc finger protein [Medicago truncatula]	-	-	-	276	3	3	NA	0	121.02	0	67.53	0	0	yes
gma-miR1509a_R-3_1ss8AC	TRINITY_DN14325_c0_g2	-	-	-	-	211	3	4	NA	NA	40.34	0	0	0	0	yes
gma-miR1509a_R-3_1ss8AC	TRINITY_DN14905_c1_g1	hypothetical protein TSUD_153800 [Trifolium subterraneum]	-	-	-	704	2	4	NA	0	40.34	0	168.82	0	0	yes
gma-miR1509a_R-3_1ss8AC	TRINITY_DN16168_c0_g1	hypothetical protein MTR_3g051375 [Medicago truncatula]	-	-	-	127	3	0	0	0	1371.52	1405.91	1586.93	0	0	yes
gma-miR1509a_R-3_1ss8AC	TRINITY_DN17033_c0_g4	-	-	-	-	488	1.5	NA	NA	2	0	0	135.06	0	0	yes
gma-miR1509a_R-3_1ss8AC	TRINITY_DN17411_c1_g1	-	-	-	-	133	2	0	0	0	1452.2	275.07	573.99	0	0	yes
gma-miR1509a_R-3_1ss8AC	TRINITY_DN17411_c1_g5	-	-	-	-	117	2	NA	NA	0	0	0	67.53	0	0	yes
gma-miR1509a_R-3_1ss8AC	TRINITY_DN19192_c1_g1	-	-	-	-	190	3	0	0	0	443.73	244.51	877.87	0	0	yes
gma-miR1509a_R-3_1ss8AC	TRINITY_DN20648_c0_g1	serine racemase isoform X2 [Solanum pennellii]	-	GO:0003941(L-serine ammonia-lyase activity);GO:0005737(cytoplasm);GO:0006563(L-serine metabolic process);GO:0008721(D-serine ammonia-lyase activity);GO:0030170(pyridoxal phosphate binding);GO:0030378(serine racemase activity);GO:0070179(D-serine biosynthetic process)	nta00260(Glycine, serine and threonine metabolism)	342	2	0	2	0	1532.88	1405.91	1384.34	0.01	0.01	yes
gma-miR1509a_R-3_1ss8AC	TRINITY_DN21915_c0_g2	-	-	-	-	293	1	0	0	0	443.73	152.82	405.17	0	0	yes
gma-miR1509a_R-3_1ss8AC	TRINITY_DN22216_c0_g1	uncharacterized protein LOC25500945 [Medicago truncatula]	At5g07830	GO:0004566(beta-glucuronidase activity);GO:0005576(extracellular region);GO:0005618(cell wall);GO:0005765(lysosomal membrane);GO:0009505(plant-type cell wall);GO:0009826(unidimensional cell growth)	cam00531(Glycosaminoglycan degradation)	1044	3	0	0	0	6050.83	2536.75	5604.89	0	0	yes
gma-miR1509a_R-3_1ss8AC	TRINITY_DN24462_c1_g4	F-box protein CPR1 [Medicago truncatula]	-	-	-	63	3	0	0	2	1331.18	397.32	270.12	0	0	yes
gma-miR1509a_R-3_1ss8AC	TRINITY_DN24988_c1_g3	transmembrane protein, putative [Medicago truncatula]	-	-	-	176	3	3	3	0	80.68	152.82	472.7	0	0	yes
gma-miR1509a_R-3_1ss8AC	TRINITY_DN8654_c0_g1	putative transcription factor bHLH family [Medicago truncatula]	-	-	-	250	3	0	0	3	685.76	580.7	202.59	0	0	yes
gma-miR1509b_2ss8AG18GA	TRINITY_DN12346_c0_g3	-	-	-	-	136	3	NA	4	NA	0	30.56	0	0	0	yes
gma-miR1509b_2ss8AG18GA	TRINITY_DN14905_c1_g1	hypothetical protein TSUD_153800 [Trifolium subterraneum]	-	-	-	1168	1.5	2	2	2	80.68	61.13	67.53	0.24	0.24	yes
gma-miR1509b_2ss8AG18GA	TRINITY_DN14905_c1_g1	hypothetical protein TSUD_153800 [Trifolium subterraneum]	-	-	-	1319	1	4	2	4	40.34	61.13	33.76	0.01	0.01	yes
gma-miR1509b_2ss8AG18GA	TRINITY_DN18081_c0_g1	drug resistance transporter-like ABC domain protein [Medicago truncatula]	ABCG36	GO:0005886(plasma membrane);GO:0016021(integral component of membrane);GO:0042626(ATPase activity, coupled to transmembrane movement of substances)	-	21	1	2	4	NA	121.02	30.56	0	0	0	yes
gma-miR1509b_2ss8AG18GA	TRINITY_DN18542_c0_g1	-	-	-	-	197	1	3	4	NA	80.68	30.56	0	0	0	yes
gma-miR1509b_2ss8AG18GA	TRINITY_DN20707_c0_g1	-	-	-	-	35	1.5	0	2	1	242.03	61.13	67.53	0	0	yes
gma-miR1509b_2ss8AG18GA	TRINITY_DN22951_c0_g2	vacuolar protein sorting-associated protein, putative [Medicago truncatula]	vps13E	GO:0005622(intracellular);GO:0006623(protein targeting to vacuole);GO:0019898(extrinsic component of membrane);GO:0045053(protein retention in Golgi apparatus)	NA(NA)	7423	3.5	4	NA	NA	40.34	0	0	0	0	yes
gma-miR1509b_2ss8AG18GA	TRINITY_DN23731_c0_g3	-	CESA5	GO:0000977(RNA polymerase II regulatory region sequence-specific DNA binding);GO:0005794(Golgi apparatus);GO:0005886(plasma membrane);GO:0009832(plant-type cell wall biogenesis);GO:0009833(plant-type primary cell wall biogenesis);GO:0010192(mucilage biosynthetic process);GO:0016021(integral component of membrane);GO:0016757(transferase activity, transferring glycosyl groups);GO:0016759(cellulose …	NA(NA)	222	2.5	0	0	0	766.44	91.69	337.64	0	0	yes
gma-miR156a_R+1	TRINITY_DN15086_c0_g1	-	-	-	-	340	3.5	3	4	NA	80.68	30.56	0	0	0	yes
gma-miR156a_R+1	TRINITY_DN19663_c0_g1	putative squamosa promoter-binding-like protein 19 [Medicago truncatula]	SPL6	GO:0003677(DNA binding);GO:0003700(DNA binding transcription factor activity);GO:0005515(protein binding);GO:0005634(nucleus);GO:0006351(transcription, DNA-templated);GO:0006355(regulation of transcription, DNA-templated);GO:0010468(regulation of gene expression);GO:0042742(defense response to bacterium);GO:0046872(metal ion binding)	mdm04075(Plant hormone signal transduction)	1011	2	0	4	1	282.37	30.56	202.59	0	0	yes
gma-miR156a_R+1	TRINITY_DN19663_c0_g3	squamosa promoter-binding-like protein 16 [Medicago truncatula]	SPL6	GO:0003677(DNA binding);GO:0003700(DNA binding transcription factor activity);GO:0005515(protein binding);GO:0005634(nucleus);GO:0006351(transcription, DNA-templated);GO:0006355(regulation of transcription, DNA-templated);GO:0010468(regulation of gene expression);GO:0042742(defense response to bacterium);GO:0046872(metal ion binding)	NA(NA)	1304	2	2	NA	2	201.69	0	202.59	0	0	yes
gma-miR156a_R+1	TRINITY_DN19663_c0_g7	squamosa promoter-binding-like protein 13A [Medicago truncatula]	SPL13A	GO:0003677(DNA binding);GO:0003700(DNA binding transcription factor activity);GO:0005634(nucleus);GO:0006355(regulation of transcription, DNA-templated);GO:0048653(anther development)	-	959	2	NA	NA	4	0	0	33.76	0	0	yes
gma-miR156a_R+1	TRINITY_DN22920_c0_g2	squamosa promoter-binding-like protein 6 isoform X1 [Medicago truncatula]	-	-	-	555	3	NA	0	NA	0	336.2	0	0	0	yes
gma-miR156a_R+1	TRINITY_DN24102_c0_g1	squamosa promoter-binding-like protein 12 [Medicago truncatula]	SPL12	GO:0003677(DNA binding);GO:0003700(DNA binding transcription factor activity);GO:0005634(nucleus);GO:0006351(transcription, DNA-templated);GO:0006355(regulation of transcription, DNA-templated);GO:0043565(sequence-specific DNA binding);GO:0044212(transcription regulatory region DNA binding);GO:0046872(metal ion binding);GO:0048510(regulation of timing of transition from vegetative to reproductive…	mdm04075(Plant hormone signal transduction)	1142	3	NA	NA	4	0	0	33.76	0	0	yes
gma-miR156a_R+1	TRINITY_DN25628_c0_g3	squamosa promoter-binding-like protein 7 [Medicago truncatula]	SPL7	GO:0003677(DNA binding);GO:0003700(DNA binding transcription factor activity);GO:0005634(nucleus);GO:0006351(transcription, DNA-templated);GO:0006355(regulation of transcription, DNA-templated);GO:0010358(leaf shaping);GO:0045893(positive regulation of transcription, DNA-templated);GO:0046872(metal ion binding);GO:0048510(regulation of timing of transition from vegetative to reproductive phase)	mdm04075(Plant hormone signal transduction)	300	2	NA	NA	0	0	0	675.29	0	0	yes
gma-miR156b_L+1R-1	TRINITY_DN19663_c0_g1	putative squamosa promoter-binding-like protein 19 [Medicago truncatula]	SPL6	GO:0003677(DNA binding);GO:0003700(DNA binding transcription factor activity);GO:0005515(protein binding);GO:0005634(nucleus);GO:0006351(transcription, DNA-templated);GO:0006355(regulation of transcription, DNA-templated);GO:0010468(regulation of gene expression);GO:0042742(defense response to bacterium);GO:0046872(metal ion binding)	mdm04075(Plant hormone signal transduction)	1012	0	2	4	NA	121.02	30.56	0	0	0	yes
gma-miR156b_L+1R-1	TRINITY_DN19663_c0_g3	squamosa promoter-binding-like protein 16 [Medicago truncatula]	SPL6	GO:0003677(DNA binding);GO:0003700(DNA binding transcription factor activity);GO:0005515(protein binding);GO:0005634(nucleus);GO:0006351(transcription, DNA-templated);GO:0006355(regulation of transcription, DNA-templated);GO:0010468(regulation of gene expression);GO:0042742(defense response to bacterium);GO:0046872(metal ion binding)	NA(NA)	1305	1	NA	NA	2	0	0	236.35	0	0	yes
gma-miR156b_L+1R-1	TRINITY_DN22920_c0_g2	squamosa promoter-binding-like protein 6 isoform X1 [Medicago truncatula]	-	-	-	556	1.5	4	4	NA	40.34	30.56	0	0	0	yes
gma-miR156b_L+1R-1	TRINITY_DN24102_c0_g1	squamosa promoter-binding-like protein 12 [Medicago truncatula]	SPL12	GO:0003677(DNA binding);GO:0003700(DNA binding transcription factor activity);GO:0005634(nucleus);GO:0006351(transcription, DNA-templated);GO:0006355(regulation of transcription, DNA-templated);GO:0043565(sequence-specific DNA binding);GO:0044212(transcription regulatory region DNA binding);GO:0046872(metal ion binding);GO:0048510(regulation of timing of transition from vegetative to reproductive…	mdm04075(Plant hormone signal transduction)	1143	1	NA	NA	2	0	0	67.53	0	0	yes
gma-miR156b_L+1R-1	TRINITY_DN25628_c0_g3	squamosa promoter-binding-like protein 7 [Medicago truncatula]	SPL7	GO:0003677(DNA binding);GO:0003700(DNA binding transcription factor activity);GO:0005634(nucleus);GO:0006351(transcription, DNA-templated);GO:0006355(regulation of transcription, DNA-templated);GO:0010358(leaf shaping);GO:0045893(positive regulation of transcription, DNA-templated);GO:0046872(metal ion binding);GO:0048510(regulation of timing of transition from vegetative to reproductive phase)	mdm04075(Plant hormone signal transduction)	301	1	NA	NA	3	0	0	67.53	0	0	yes
gma-miR156c	TRINITY_DN22590_c0_g2	squamosa promoter-binding-like protein 13A [Medicago truncatula]	TGA1	GO:0003677(DNA binding);GO:0003700(DNA binding transcription factor activity);GO:0005634(nucleus);GO:0006355(regulation of transcription, DNA-templated);GO:0048653(anther development)	NA(NA)	1159	0	0	0	0	1290.84	275.07	844.11	0	0	yes
gma-miR159a-3p_1ss21AT	TRINITY_DN16207_c2_g1	transcription factor MYB33 [Medicago truncatula]	GAM1	GO:0000981(RNA polymerase II transcription factor activity, sequence-specific DNA binding);GO:0001135(transcription factor activity, RNA polymerase II transcription factor recruiting);GO:0003677(DNA binding);GO:0003700(DNA binding transcription factor activity);GO:0005634(nucleus);GO:0006351(transcription, DNA-templated);GO:0006355(regulation of transcription, DNA-templated);GO:0006357(regulation…	NA(NA)	1054	2	0	0	0	3025.41	1039.15	2869.97	0	0	yes
gma-miR159a-3p_1ss21AT	TRINITY_DN20253_c0_g2	Cyclin-like F-box; FAR1; Zinc finger, SWIM-type [Medicago truncatula]	-	-	NA(NA)	774	3	4	NA	2	40.34	0	67.53	0	0	yes
gma-miR166a-3p_L+2R-2	TRINITY_DN24164_c2_g2	homeobox-leucine zipper protein ATHB-15 [Medicago truncatula]	ATHB-15	GO:0003677(DNA binding);GO:0003700(DNA binding transcription factor activity);GO:0005634(nucleus);GO:0006351(transcription, DNA-templated);GO:0006355(regulation of transcription, DNA-templated);GO:0008289(lipid binding);GO:0009855(determination of bilateral symmetry);GO:0009965(leaf morphogenesis);GO:0010014(meristem initiation);GO:0010073(meristem maintenance);GO:0010075(regulation of meristem g…	NA(NA)	683	1	4	NA	NA	40.34	0	0	0	0	yes
gma-miR166a-3p_L+2R-2	TRINITY_DN24440_c0_g3	homeobox-leucine zipper protein REVOLUTA [Medicago truncatula]	REV	GO:0003677(DNA binding);GO:0003700(DNA binding transcription factor activity);GO:0005634(nucleus);GO:0006351(transcription, DNA-templated);GO:0006355(regulation of transcription, DNA-templated);GO:0008289(lipid binding);GO:0009855(determination of bilateral symmetry);GO:0009944(polarity specification of adaxial/abaxial axis);GO:0009956(radial pattern formation);GO:0010014(meristem initiation);GO:…	NA(NA)	900	2.5	NA	NA	2	0	0	337.64	0	0	yes
gma-miR167c_R+1	TRINITY_DN4237_c0_g1	-	-	-	-	190	3	NA	4	0	0	30.56	101.29	0	0	yes
gma-miR171c-3p_2ss9TC21AT	TRINITY_DN25356_c0_g1	hypothetical protein TSUD_266180 [Trifolium subterraneum]	SCL6	GO:0003700(DNA binding transcription factor activity);GO:0005634(nucleus);GO:0006355(regulation of transcription, DNA-templated);GO:0010492(maintenance of shoot apical meristem identity);GO:0043565(sequence-specific DNA binding);GO:0048768(root hair cell tip growth);GO:0051301(cell division)	gmx04075(Plant hormone signal transduction)	1360	1	0	0	0	1089.15	916.9	1080.46	0	0	yes
gma-miR394a-5p_L+1	TRINITY_DN21141_c0_g4	F-box only protein 6 isoform X1 [Medicago truncatula]	FBX6	GO:0004842(ubiquitin-protein transferase activity);GO:0010305(leaf vascular tissue pattern formation);GO:0010928(regulation of auxin mediated signaling pathway);GO:0019005(SCF ubiquitin ligase complex);GO:0031146(SCF-dependent proteasomal ubiquitin-dependent protein catabolic process);GO:0060776(simple leaf morphogenesis)	-	1097	1	0	2	0	363.05	122.25	405.17	0	0	yes
gma-miR408a-3p_L-1R+2	TRINITY_DN17015_c0_g2	protein FATTY ACID EXPORT 1, chloroplastic [Medicago truncatula]	FAX1	GO:0009507(chloroplast);GO:0009536(plastid);GO:0009706(chloroplast inner membrane);GO:0009941(chloroplast envelope);GO:0010208(pollen wall assembly);GO:0015245(fatty acid transmembrane transporter activity);GO:0015908(fatty acid transport);GO:0016021(integral component of membrane);GO:0055088(lipid homeostasis);GO:0071668(plant-type cell wall assembly);GO:1902001(fatty acid transmembrane transpor…	-	390	3.5	3	NA	NA	80.68	0	0	0	0	yes
gma-miR4415a-3p_1ss18AT	TRINITY_DN18817_c0_g1	Peptidyl-prolyl cis-trans isomerase SDCCAG10 [Cajanus cajan]	CYP57	GO:0003755(peptidyl-prolyl cis-trans isomerase activity)	NA(NA)	1115	3.5	2	NA	NA	121.02	0	0	0	0	yes
gma-miR4415a-3p_1ss18AT	TRINITY_DN21138_c0_g2	putative L-ascorbate oxidase [Medicago truncatula]	AAO	GO:0005507(copper ion binding);GO:0016722(oxidoreductase activity, oxidizing metal ions)	mtr00053(Ascorbate and aldarate metabolism)	287	3	NA	3	3	0	91.69	67.53	0	0	yes
hbr-miR6173_L-2	TRINITY_DN25590_c1_g1	-	-	-	-	195	3.5	3	NA	2	80.68	0	101.29	0	0	yes
lja-MIR11078a-p3_2ss6GC18AT	TRINITY_DN20648_c0_g1	serine racemase isoform X2 [Solanum pennellii]	-	GO:0003941(L-serine ammonia-lyase activity);GO:0005737(cytoplasm);GO:0006563(L-serine metabolic process);GO:0008721(D-serine ammonia-lyase activity);GO:0030170(pyridoxal phosphate binding);GO:0030378(serine racemase activity);GO:0070179(D-serine biosynthetic process)	nta00260(Glycine, serine and threonine metabolism)	487	0	2	0	2	524.41	2842.39	911.64	0	0	yes
lja-MIR11078a-p3_2ss6GC18AT	TRINITY_DN20648_c0_g3	putative ammonia-lyase, Serine racemase [Medicago truncatula]	OsI_16936	GO:0003941(L-serine ammonia-lyase activity);GO:0005737(cytoplasm);GO:0006563(L-serine metabolic process);GO:0008721(D-serine ammonia-lyase activity);GO:0030170(pyridoxal phosphate binding);GO:0030378(serine racemase activity);GO:0070179(D-serine biosynthetic process)	ccaj00260(Glycine, serine and threonine metabolism)	159	2	4	NA	NA	40.34	0	0	0	0	yes
lus-miR396b_R+1_1ss19CT	TRINITY_DN26117_c0_g1	probable inactive purple acid phosphatase 27 [Medicago truncatula]	PAP27	GO:0003993(acid phosphatase activity);GO:0004722(protein serine/threonine phosphatase activity);GO:0005576(extracellular region);GO:0016311(dephosphorylation);GO:0046872(metal ion binding)	-	2012	3.5	NA	NA	4	0	0	33.76	0	0	yes
mes-MIR2275-p3_2ss13AG17CT	TRINITY_DN23516_c0_g1	hypothetical protein L195_g011174 [Trifolium pratense]	-	GO:0003674(molecular_function);GO:0005634(nucleus);GO:0008150(biological_process)	-	1330	3.5	NA	NA	4	0	0	33.76	0	0	yes
mes-MIR2275-p3_2ss13AG17CT	TRINITY_DN25889_c1_g1	protein phosphatase 2C and cyclic nucleotide-binding/kinase domain-containing protein isoform X1 [Medicago truncatula]	At2g20050/At2g20040	GO:0004672(protein kinase activity);GO:0004674(protein serine/threonine kinase activity);GO:0004721(phosphoprotein phosphatase activity);GO:0004722(protein serine/threonine phosphatase activity);GO:0005524(ATP binding);GO:0005886(plasma membrane);GO:0006468(protein phosphorylation);GO:0046872(metal ion binding)	NA(NA)	1769	3.5	4	NA	2	40.34	0	101.29	0	0	yes
mtr-MIR160b-p5_1	TRINITY_DN25655_c1_g1	enhancer of mRNA-decapping protein 4 [Medicago truncatula]	VCS	GO:0000166(nucleotide binding);GO:0000932(P-body);GO:0003729(mRNA binding);GO:0005515(protein binding);GO:0005634(nucleus);GO:0005829(cytosol);GO:0006397(mRNA processing);GO:0006402(mRNA catabolic process);GO:0009791(post-embryonic development);GO:0009965(leaf morphogenesis);GO:0010071(root meristem specification);GO:0010072(primary shoot apical meristem specification);GO:0031087(deadenylation-in…	mtr03018(RNA degradation)	1200	3.5	NA	NA	4	0	0	33.76	0	0	yes
mtr-MIR2586a-p3_1	TRINITY_DN17852_c0_g6	-	-	-	-	57	2	4	1	NA	40.34	61.13	0	0	0	yes
mtr-MIR2586a-p3_3	TRINITY_DN20517_c0_g2	proline dehydrogenase [Medicago sativa]	POX1	GO:0004657(proline dehydrogenase activity);GO:0005739(mitochondrion);GO:0006537(glutamate biosynthetic process);GO:0006562(proline catabolic process);GO:0006979(response to oxidative stress);GO:0009414(response to water deprivation);GO:0010133(proline catabolic process to glutamate);GO:0042742(defense response to bacterium);GO:0055114(oxidation-reduction process);GO:0071949(FAD binding)	mtr00330(Arginine and proline metabolism)	926	3.5	NA	4	NA	0	30.56	0	0	0	yes
mtr-MIR2592ae-p5_1ss17TA	TRINITY_DN20407_c0_g1	aldehyde dehydrogenase family 2 member B7, mitochondrial [Medicago truncatula]	ALDH2B7	GO:0004029(aldehyde dehydrogenase (NAD) activity)	mtr00010(Glycolysis / Gluconeogenesis);mtr00053(Ascorbate and aldarate metabolism);mtr00620(Pyruvate metabolism);mtr00071(Fatty acid degradation);mtr00561(Glycerolipid metabolism);mtr00280(Valine, leucine and isoleucine degradation);mtr00310(Lysine degradation);mtr00330(Arginine and proline metabolism);mtr00340(Histidine metabolism);mtr00380(Tryptophan metabolism);mtr00410(beta-Alanine metabolism…	1494	2	2	3	4	322.71	91.69	33.76	0	0	yes
mtr-MIR2592ae-p5_1ss17TA	TRINITY_DN21819_c0_g3	UDP-glycosyltransferase 76F1 isoform X2 [Medicago truncatula]	UGT76F1	GO:0009813(flavonoid biosynthetic process);GO:0043231(intracellular membrane-bounded organelle);GO:0052696(flavonoid glucuronidation);GO:0080043(quercetin 3-O-glucosyltransferase activity);GO:0080044(quercetin 7-O-glucosyltransferase activity)	eus00908(Zeatin biosynthesis)	852	3.5	2	4	2	121.02	30.56	135.06	0	0	yes
mtr-MIR2592ay-p5_2ss6AG17CG	TRINITY_DN17031_c0_g7	plant UBX domain-containing protein 4 [Medicago truncatula]	PUX4	GO:0005634(nucleus);GO:0005829(cytosol);GO:0007030(Golgi organization);GO:0031468(nuclear envelope reassembly);GO:0043130(ubiquitin binding);GO:0043161(proteasome-mediated ubiquitin-dependent protein catabolic process);GO:0061025(membrane fusion)	mtr04141(Protein processing in endoplasmic reticulum)	373	3.5	4	NA	2	40.34	0	202.59	0	0	yes
mtr-MIR2592ay-p5_2ss6AG17CG	TRINITY_DN22355_c0_g2	aspartyl protease family protein 1 [Medicago truncatula]	APF1	GO:0004190(aspartic-type endopeptidase activity);GO:0006508(proteolysis);GO:0030163(protein catabolic process)	-	1103	3	NA	2	NA	0	122.25	0	0	0	yes
mtr-MIR2601-p3_2ss9AC19GT	TRINITY_DN21186_c0_g1	homeobox protein LUMINIDEPENDENS [Medicago truncatula]	LD	GO:0003677(DNA binding);GO:0003700(DNA binding transcription factor activity);GO:0005515(protein binding);GO:0005634(nucleus);GO:0006355(regulation of transcription, DNA-templated);GO:0009908(flower development);GO:0009911(positive regulation of flower development);GO:0010228(vegetative to reproductive phase transition of meristem);GO:0030154(cell differentiation)	-	50	3.5	2	NA	NA	80.68	0	0	0	0	yes
mtr-MIR2603-p5_1ss15AG	TRINITY_DN22701_c0_g3	putative armadillo-like helical protein [Medicago truncatula]	-	GO:0005635(nuclear envelope);GO:0005829(cytosol);GO:0006606(protein import into nucleus);GO:0007165(signal transduction)	NA(NA)	3556	3	3	NA	NA	80.68	0	0	0	0	yes
mtr-MIR2604-p3_2ss18TG19CT	TRINITY_DN24811_c0_g1	oxygen-evolving enhancer protein 2, chloroplastic isoform X1 [Medicago truncatula]	PSBP	GO:0005509(calcium ion binding);GO:0008266(poly(U) RNA binding);GO:0009507(chloroplast);GO:0009534(chloroplast thylakoid);GO:0009535(chloroplast thylakoid membrane);GO:0009543(chloroplast thylakoid lumen);GO:0009570(chloroplast stroma);GO:0009579(thylakoid);GO:0009654(photosystem II oxygen evolving complex);GO:0009941(chloroplast envelope);GO:0019684(photosynthesis, light reaction);GO:0019898(ext…	mtr00195(Photosynthesis)	725	0	3	NA	NA	80.68	0	0	0	0	yes
mtr-MIR2606a-p5_1	TRINITY_DN24798_c0_g1	-	-	-	-	146	2	NA	4	NA	0	30.56	0	0	0	yes
mtr-MIR2630w-p3_2ss6GC17TC	TRINITY_DN19925_c0_g1	pyrroline-5-carboxylate synthetase [Medicago sativa subsp. x varia]	-	GO:0004350(glutamate-5-semialdehyde dehydrogenase activity);GO:0005737(cytoplasm);GO:0006561(proline biosynthetic process)	mtr00330(Arginine and proline metabolism)	1859	3.5	NA	4	2	0	30.56	202.59	0	0	yes
mtr-MIR2673b-p5_1ss13AT	TRINITY_DN14837_c0_g2	glycine-rich cell wall structural protein [Medicago truncatula]	-	-	-	424	3.5	NA	2	NA	0	91.69	0	0	0	yes
mtr-MIR2673b-p5_1ss13AT	TRINITY_DN20139_c1_g2	frigida-like protein [Medicago truncatula]	-	-	-	458	3	2	NA	NA	161.36	0	0	0	0	yes
mtr-MIR2673b-p5_1ss13AT	TRINITY_DN20139_c1_g2	frigida-like protein [Medicago truncatula]	-	-	-	479	1	4	2	NA	40.34	122.25	0	0	0	yes
mtr-MIR2673b-p5_1ss13AT	TRINITY_DN21386_c1_g2	CBL-interacting serine/threonine-protein kinase 1 [Medicago truncatula]	CIPK1	GO:0004674(protein serine/threonine kinase activity);GO:0005634(nucleus);GO:0005737(cytoplasm);GO:0006468(protein phosphorylation);GO:0035556(intracellular signal transduction)	NA(NA)	1638	3.5	3	NA	4	80.68	0	33.76	0	0	yes
mtr-MIR2673b-p5_1ss13AT	TRINITY_DN22017_c0_g1	protein argonaute 2 [Medicago truncatula]	AGO2	GO:0003729(mRNA binding);GO:0005515(protein binding);GO:0005634(nucleus);GO:0005737(cytoplasm);GO:0005829(cytosol);GO:0006351(transcription, DNA-templated);GO:0006355(regulation of transcription, DNA-templated);GO:0006417(regulation of translation);GO:0019048(modulation by virus of host morphology or physiology);GO:0031047(gene silencing by RNA);GO:0035197(siRNA binding);GO:0042742(defense respon…	NA(NA)	233	3.5	NA	NA	2	0	0	67.53	0	0	yes
mtr-MIR2673b-p5_1ss13AT	TRINITY_DN23033_c0_g1	putative transcription factor MYB-HB-like family [Medicago truncatula]	-	GO:0000209(protein polyubiquitination);GO:0043161(proteasome-mediated ubiquitin-dependent protein catabolic process);GO:0061630(ubiquitin protein ligase activity)	mtr00190(Oxidative phosphorylation);mtr00195(Photosynthesis)	354	3	NA	4	NA	0	30.56	0	0	0	yes
mtr-MIR2678-p5_1	TRINITY_DN20130_c0_g4	DIS3-like exonuclease 2 isoform X1 [Medicago truncatula]	SOV	GO:0000175(3'-5'-exoribonuclease activity);GO:0000176(nuclear exosome (RNase complex));GO:0000177(cytoplasmic exosome (RNase complex));GO:0000932(P-body);GO:0006364(rRNA processing);GO:0006402(mRNA catabolic process);GO:0016075(rRNA catabolic process)	NA(NA)	2688	3	NA	NA	4	0	0	33.76	0	0	yes
mtr-MIR2678-p5_1ss11AG	TRINITY_DN25764_c1_g4	TIR-NBS-LRR resistance protein [Trifolium pratense]	-	GO:0005737(cytoplasm);GO:0006952(defense response);GO:0007165(signal transduction);GO:0016021(integral component of membrane);GO:0043531(ADP binding)	NA(NA)	409	3.5	2	NA	4	121.02	0	33.76	0	0	yes
mtr-MIR5230-p3_1ss3AG	TRINITY_DN12989_c0_g1	glucose-induced degradation protein 8 homolog [Medicago truncatula]	SPAC12B10.13	GO:0003674(molecular_function);GO:0008150(biological_process)	-	573	3	4	NA	NA	40.34	0	0	0	0	yes
mtr-MIR5230-p3_1ss3AG	TRINITY_DN20474_c0_g5	exocyst complex component EXO70A1 [Medicago truncatula]	EXO70A1	GO:0000145(exocyst);GO:0006904(vesicle docking involved in exocytosis)	NA(NA)	1641	3.5	NA	NA	4	0	0	33.76	0	0	yes
mtr-MIR5245-p3_2ss16GA18AT	TRINITY_DN25494_c2_g1	TMV resistance protein N-like [Cicer arietinum]	-	GO:0005737(cytoplasm);GO:0006952(defense response);GO:0007165(signal transduction);GO:0016021(integral component of membrane);GO:0043531(ADP binding)	NA(NA)	130	2	NA	NA	4	0	0	33.76	0	0	yes
mtr-MIR5281b-p3_2ss4AC18TA	TRINITY_DN17273_c0_g1	-	-	-	-	86	1	4	NA	NA	40.34	0	0	0	0	yes
mtr-MIR5281b-p3_2ss4AC18TA	TRINITY_DN20901_c1_g3	-	-	-	-	61	1.5	NA	NA	4	0	0	33.76	0	0	yes
mtr-MIR5281b-p5_2ss7AC21TA	TRINITY_DN17273_c0_g1	-	-	-	-	89	1	NA	1	NA	0	122.25	0	0	0	yes
mtr-MIR5298c-p5_2ss3GA21AT	TRINITY_DN19487_c0_g1	30S ribosomal protein S21, chloroplastic [Medicago truncatula]	-	GO:0044391(ribosomal subunit)	-	215	3	4	3	3	40.34	122.25	135.06	0	0	yes
mtr-miR1510a-3p_1ss1CA	TRINITY_DN21492_c0_g1	nucleotidyltransferase [Medicago truncatula]	-	GO:0003729(mRNA binding);GO:0005634(nucleus);GO:0008150(biological_process)	lang03018(RNA degradation)	1974	3	NA	NA	4	0	0	33.76	0	0	yes
mtr-miR156b-5p	TRINITY_DN19663_c0_g3	squamosa promoter-binding-like protein 16 [Medicago truncatula]	SPL6	GO:0003677(DNA binding);GO:0003700(DNA binding transcription factor activity);GO:0005515(protein binding);GO:0005634(nucleus);GO:0006351(transcription, DNA-templated);GO:0006355(regulation of transcription, DNA-templated);GO:0010468(regulation of gene expression);GO:0042742(defense response to bacterium);GO:0046872(metal ion binding)	NA(NA)	1304	1	NA	0	NA	0	397.32	0	0	0	yes
mtr-miR156b-5p	TRINITY_DN22920_c0_g2	squamosa promoter-binding-like protein 6 isoform X1 [Medicago truncatula]	-	-	-	555	2	2	NA	0	403.39	0	844.11	0	0	yes
mtr-miR156b-5p	TRINITY_DN25628_c0_g3	squamosa promoter-binding-like protein 7 [Medicago truncatula]	SPL7	GO:0003677(DNA binding);GO:0003700(DNA binding transcription factor activity);GO:0005634(nucleus);GO:0006351(transcription, DNA-templated);GO:0006355(regulation of transcription, DNA-templated);GO:0010358(leaf shaping);GO:0045893(positive regulation of transcription, DNA-templated);GO:0046872(metal ion binding);GO:0048510(regulation of timing of transition from vegetative to reproductive phase)	mdm04075(Plant hormone signal transduction)	300	1	0	0	NA	322.71	61.13	0	0	0	yes
mtr-miR156g-5p	TRINITY_DN15141_c0_g3	PREDICTED: squamosa promoter-binding-like protein 3 [Lupinus angustifolius]	SPL13	GO:0003677(DNA binding);GO:0003700(DNA binding transcription factor activity);GO:0005634(nucleus);GO:0005737(cytoplasm);GO:0006351(transcription, DNA-templated);GO:0006355(regulation of transcription, DNA-templated);GO:0010321(regulation of vegetative phase change);GO:0046872(metal ion binding)	-	2034	1.5	0	0	0	766.44	427.89	438.94	0	0	yes
mtr-miR159a	TRINITY_DN16207_c1_g2	transcription factor MYB65 [Medicago truncatula]	GAM1	GO:0000981(RNA polymerase II transcription factor activity, sequence-specific DNA binding);GO:0001135(transcription factor activity, RNA polymerase II transcription factor recruiting);GO:0003677(DNA binding);GO:0003700(DNA binding transcription factor activity);GO:0005634(nucleus);GO:0006351(transcription, DNA-templated);GO:0006355(regulation of transcription, DNA-templated);GO:0006357(regulation…	NA(NA)	1516	3.5	0	0	0	1936.26	641.83	1553.16	0	0	yes
mtr-miR160a	TRINITY_DN22028_c1_g1	auxin response factor 17 [Medicago truncatula]	ARF17	GO:0000987(proximal promoter sequence-specific DNA binding);GO:0003700(DNA binding transcription factor activity);GO:0005634(nucleus);GO:0006351(transcription, DNA-templated);GO:0006355(regulation of transcription, DNA-templated);GO:0009555(pollen development);GO:0009653(anatomical structure morphogenesis);GO:0009734(auxin-activated signaling pathway);GO:0010208(pollen wall assembly);GO:0048830(a…	lja04075(Plant hormone signal transduction)	1455	0.5	0	0	0	4316.26	3025.76	4862.07	0	0	yes
mtr-miR160c	TRINITY_DN21834_c0_g2	auxin response factor 18 isoform X1 [Medicago truncatula]	ARF18	GO:0003677(DNA binding);GO:0003700(DNA binding transcription factor activity);GO:0005515(protein binding);GO:0005634(nucleus);GO:0006351(transcription, DNA-templated);GO:0006355(regulation of transcription, DNA-templated);GO:0007389(pattern specification process);GO:0009733(response to auxin);GO:0009734(auxin-activated signaling pathway);GO:0035198(miRNA binding);GO:0048829(root cap development);…	gra04075(Plant hormone signal transduction)	1666	1	0	0	0	3307.79	3759.28	5233.48	0	0	yes
mtr-miR160c_1ss15AT	TRINITY_DN19308_c1_g2	auxin response factor 10 [Medicago truncatula]	ARF10	GO:0003677(DNA binding);GO:0003700(DNA binding transcription factor activity);GO:0005634(nucleus);GO:0006351(transcription, DNA-templated);GO:0006355(regulation of transcription, DNA-templated);GO:0007389(pattern specification process);GO:0009734(auxin-activated signaling pathway);GO:0009738(abscisic acid-activated signaling pathway);GO:0009743(response to carbohydrate);GO:0010154(fruit developme…	csat04075(Plant hormone signal transduction)	330	1	0	0	0	645.42	305.63	1283.05	0	0	yes
mtr-miR162	TRINITY_DN19212_c1_g2	Helicase, C-terminal; Argonaute and Dicer protein, PAZ; Ribonuclease III, bacterial [Medicago truncatula]	DCL1	GO:0003723(RNA binding);GO:0004525(ribonuclease III activity);GO:0005634(nucleus);GO:0005737(cytoplasm);GO:0016442(RISC complex);GO:0030422(production of siRNA involved in RNA interference)	NA(NA)	2579	2	2	3	2	242.03	61.13	168.82	0	0	yes
mtr-miR164a	TRINITY_DN23959_c0_g2	NAC domain-containing protein 100 [Medicago truncatula]	NAC100	GO:0003677(DNA binding);GO:0003700(DNA binding transcription factor activity);GO:0005634(nucleus);GO:0006351(transcription, DNA-templated);GO:0006355(regulation of transcription, DNA-templated);GO:0007275(multicellular organism development)	fve03013(RNA transport);fve03015(mRNA surveillance pathway);fve03018(RNA degradation)	1115	3.5	0	0	0	322.71	275.07	438.94	0	0	yes
mtr-miR164a_R+1	TRINITY_DN17114_c0_g1	UDP-glucuronic acid decarboxylase 6 [Medicago truncatula]	UXS5	GO:0003824(catalytic activity);GO:0005829(cytosol);GO:0005886(plasma membrane);GO:0009225(nucleotide-sugar metabolic process);GO:0033320(UDP-D-xylose biosynthetic process);GO:0042732(D-xylose metabolic process);GO:0048040(UDP-glucuronate decarboxylase activity);GO:0070403(NAD+ binding)	mtr00520(Amino sugar and nucleotide sugar metabolism)	321	3	4	NA	NA	40.34	0	0	0	0	yes
mtr-miR166a_1ss21CA	TRINITY_DN24440_c0_g1	putative transcription factor & lipid binding HD-SAD family [Medicago truncatula]	REV	GO:0003677(DNA binding);GO:0003700(DNA binding transcription factor activity);GO:0005634(nucleus);GO:0006351(transcription, DNA-templated);GO:0006355(regulation of transcription, DNA-templated);GO:0008289(lipid binding);GO:0009855(determination of bilateral symmetry);GO:0009944(polarity specification of adaxial/abaxial axis);GO:0009956(radial pattern formation);GO:0010014(meristem initiation);GO:…	NA(NA)	1426	2	0	NA	NA	1290.84	0	0	0	0	yes
mtr-miR166a_1ss21CA	TRINITY_DN24440_c0_g3	homeobox-leucine zipper protein REVOLUTA [Medicago truncatula]	REV	GO:0003677(DNA binding);GO:0003700(DNA binding transcription factor activity);GO:0005634(nucleus);GO:0006351(transcription, DNA-templated);GO:0006355(regulation of transcription, DNA-templated);GO:0008289(lipid binding);GO:0009855(determination of bilateral symmetry);GO:0009944(polarity specification of adaxial/abaxial axis);GO:0009956(radial pattern formation);GO:0010014(meristem initiation);GO:…	NA(NA)	898	2	0	0	0	6696.25	3789.85	5773.71	0	0	yes
mtr-miR166a_2ss20CT21CA	TRINITY_DN24164_c2_g1	homeobox-leucine zipper protein ATHB-15 [Medicago truncatula]	ATHB-15	GO:0003677(DNA binding);GO:0003700(DNA binding transcription factor activity);GO:0005634(nucleus);GO:0006351(transcription, DNA-templated);GO:0006355(regulation of transcription, DNA-templated);GO:0008289(lipid binding);GO:0009855(determination of bilateral symmetry);GO:0009965(leaf morphogenesis);GO:0010014(meristem initiation);GO:0010073(meristem maintenance);GO:0010075(regulation of meristem g…	NA(NA)	828	3	2	2	2	282.37	91.69	202.59	0	0	yes
mtr-miR166a_2ss20CT21CA	TRINITY_DN24164_c2_g2	homeobox-leucine zipper protein ATHB-15 [Medicago truncatula]	ATHB-15	GO:0003677(DNA binding);GO:0003700(DNA binding transcription factor activity);GO:0005634(nucleus);GO:0006351(transcription, DNA-templated);GO:0006355(regulation of transcription, DNA-templated);GO:0008289(lipid binding);GO:0009855(determination of bilateral symmetry);GO:0009965(leaf morphogenesis);GO:0010014(meristem initiation);GO:0010073(meristem maintenance);GO:0010075(regulation of meristem g…	NA(NA)	681	3	0	0	0	887.45	672.39	472.7	0	0	yes
mtr-miR166a_L+1_2	TRINITY_DN24164_c2_g3	homeobox-leucine zipper protein ATHB-14 isoform X2 [Medicago truncatula]	HOX32	GO:0003677(DNA binding);GO:0003700(DNA binding transcription factor activity);GO:0005634(nucleus);GO:0006351(transcription, DNA-templated);GO:0006355(regulation of transcription, DNA-templated);GO:0008289(lipid binding);GO:0009855(determination of bilateral symmetry);GO:0009944(polarity specification of adaxial/abaxial axis);GO:0009955(adaxial/abaxial pattern specification);GO:0010014(meristem in…	NA(NA)	829	3.5	4	NA	NA	40.34	0	0	0	0	yes
mtr-miR166a_L+1_2	TRINITY_DN24440_c0_g1	putative transcription factor & lipid binding HD-SAD family [Medicago truncatula]	REV	GO:0003677(DNA binding);GO:0003700(DNA binding transcription factor activity);GO:0005634(nucleus);GO:0006351(transcription, DNA-templated);GO:0006355(regulation of transcription, DNA-templated);GO:0008289(lipid binding);GO:0009855(determination of bilateral symmetry);GO:0009944(polarity specification of adaxial/abaxial axis);GO:0009956(radial pattern formation);GO:0010014(meristem initiation);GO:…	NA(NA)	1427	3.5	NA	2	NA	0	91.69	0	0	0	yes
mtr-miR171d	TRINITY_DN25356_c0_g1	hypothetical protein TSUD_266180 [Trifolium subterraneum]	SCL6	GO:0003700(DNA binding transcription factor activity);GO:0005634(nucleus);GO:0006355(regulation of transcription, DNA-templated);GO:0010492(maintenance of shoot apical meristem identity);GO:0043565(sequence-specific DNA binding);GO:0048768(root hair cell tip growth);GO:0051301(cell division)	gmx04075(Plant hormone signal transduction)	1363	1	4	2	4	40.34	91.69	33.76	0	0	yes
mtr-miR172b	TRINITY_DN16588_c0_g2	ethylene-responsive transcription factor RAP2-7 isoform X1 [Medicago truncatula]	RAP2-7	GO:0003677(DNA binding);GO:0003700(DNA binding transcription factor activity);GO:0005634(nucleus);GO:0006351(transcription, DNA-templated);GO:0006355(regulation of transcription, DNA-templated);GO:0009908(flower development);GO:0010073(meristem maintenance);GO:0010093(specification of floral organ identity);GO:0019953(sexual reproduction);GO:0030154(cell differentiation);GO:0048316(seed developme…	NA(NA)	1416	3	0	0	0	443.73	336.2	236.35	0	0	yes
mtr-miR172b	TRINITY_DN19871_c0_g1	-	-	-	-	435	1.5	3	NA	2	80.68	0	236.35	0	0	yes
mtr-miR172b	TRINITY_DN19871_c0_g6	hypothetical protein MTR_4g057950 [Medicago truncatula]	-	-	-	479	1.5	NA	4	2	0	30.56	270.12	0	0	yes
mtr-miR172b	TRINITY_DN22322_c0_g1	ethylene-responsive transcription factor RAP2-7 isoform X2 [Medicago truncatula]	AP2	GO:0003677(DNA binding);GO:0003700(DNA binding transcription factor activity);GO:0005634(nucleus);GO:0006351(transcription, DNA-templated);GO:0006355(regulation of transcription, DNA-templated);GO:0009908(flower development);GO:0010073(meristem maintenance);GO:0010093(specification of floral organ identity);GO:0019953(sexual reproduction);GO:0030154(cell differentiation);GO:0048316(seed developme…	NA(NA)	1232	3	0	4	1	1250.5	30.56	709.05	0	0	yes
mtr-miR172b	TRINITY_DN22709_c0_g1	ethylene-responsive transcription factor RAP2-7 isoform X4 [Medicago truncatula]	RAP2-7	GO:0003677(DNA binding);GO:0003700(DNA binding transcription factor activity);GO:0005634(nucleus);GO:0006351(transcription, DNA-templated);GO:0006355(regulation of transcription, DNA-templated);GO:0009908(flower development);GO:0010073(meristem maintenance);GO:0010093(specification of floral organ identity);GO:0019953(sexual reproduction);GO:0030154(cell differentiation);GO:0048316(seed developme…	NA(NA)	1139	2	0	0	0	3388.46	611.27	2160.92	0	0	yes
mtr-miR172d-3p_R+1	TRINITY_DN13158_c0_g1	uncharacterized protein LOC11442030 [Medicago truncatula]	-	GO:0003677(DNA binding);GO:0005634(nucleus);GO:0008150(biological_process)	-	1167	3.5	2	NA	NA	80.68	0	0	0	0	yes
mtr-miR172d-3p_R+1	TRINITY_DN19871_c0_g1	-	-	-	-	435	2.5	NA	4	NA	0	30.56	0	0	0	yes
mtr-miR172d-3p_R+1	TRINITY_DN19871_c0_g6	hypothetical protein MTR_4g057950 [Medicago truncatula]	-	-	-	479	2.5	3	NA	NA	161.36	0	0	0	0	yes
mtr-miR172d-3p_R+1	TRINITY_DN20294_c0_g3	floral homeotic protein APETALA 2 isoform X2 [Medicago truncatula]	AP2	GO:0003677(DNA binding);GO:0003700(DNA binding transcription factor activity);GO:0005634(nucleus);GO:0006351(transcription, DNA-templated);GO:0006355(regulation of transcription, DNA-templated);GO:0009908(flower development);GO:0010073(meristem maintenance);GO:0010093(specification of floral organ identity);GO:0019953(sexual reproduction);GO:0030154(cell differentiation);GO:0048316(seed developme…	NA(NA)	933	2	0	4	2	242.03	30.56	303.88	0	0	yes
mtr-miR172d-3p_R+1	TRINITY_DN23862_c0_g4	-	-	-	-	72	2	NA	NA	4	0	0	33.76	0	0	yes
mtr-miR2111a-5p_R-3	TRINITY_DN17312_c0_g1	glutamate receptor 2.7 [Medicago truncatula]	GLR2.9	GO:0004970(ionotropic glutamate receptor activity);GO:0005217(intracellular ligand-gated ion channel activity);GO:0005515(protein binding);GO:0005634(nucleus);GO:0006811(ion transport);GO:0006874(cellular calcium ion homeostasis);GO:0009416(response to light stimulus);GO:0016021(integral component of membrane)	NA(NA)	1686	3.5	3	2	2	201.69	764.08	371.41	0	0	yes
mtr-miR2111a-5p_R-3	TRINITY_DN19297_c0_g2	21.7 kDa class VI heat shock protein, partial [Medicago truncatula]	HSP21.7	GO:0003674(molecular_function);GO:0005737(cytoplasm);GO:0008150(biological_process)	cam04141(Protein processing in endoplasmic reticulum)	968	3	4	NA	NA	40.34	0	0	0	0	yes
mtr-miR2111a-5p_R-3	TRINITY_DN19415_c0_g1	threonylcarbamoyladenosine tRNA methylthiotransferase [Medicago truncatula]	GA19679	GO:0005783(endoplasmic reticulum);GO:0035598(N6-threonylcarbomyladenosine methylthiotransferase activity);GO:0051539(4 iron, 4 sulfur cluster binding)	NA(NA)	1058	3.5	2	NA	NA	80.68	0	0	0	0	yes
mtr-miR2118_1ss18TG	TRINITY_DN16257_c0_g4	-	-	-	-	473	0.5	4	0	0	40.34	152.82	168.82	0	0	yes
mtr-miR2119	TRINITY_DN23757_c0_g1	alcohol dehydrogenase 1 isoform X1 [Medicago truncatula]	ADH1	GO:0000166(nucleotide binding);GO:0001666(response to hypoxia);GO:0004022(alcohol dehydrogenase (NAD) activity);GO:0005737(cytoplasm);GO:0005794(Golgi apparatus);GO:0005829(cytosol);GO:0005886(plasma membrane);GO:0006970(response to osmotic stress);GO:0008270(zinc ion binding);GO:0009409(response to cold);GO:0009413(response to flooding);GO:0009414(response to water deprivation);GO:0009651(respon…	mtr00010(Glycolysis / Gluconeogenesis);mtr00071(Fatty acid degradation);mtr00592(alpha-Linolenic acid metabolism);mtr00350(Tyrosine metabolism)	311	3.5	NA	NA	4	0	0	33.76	0	0	yes
mtr-miR2586a_L+5R-2_2	TRINITY_DN21843_c0_g2	probable receptor-like protein kinase At1g80640 [Medicago truncatula]	At1g80640	GO:0005886(plasma membrane);GO:0006468(protein phosphorylation);GO:0016301(kinase activity);GO:0016310(phosphorylation)	NA(NA)	1517	3	NA	4	NA	0	30.56	0	0	0	yes
mtr-miR2612_L+2R-2	TRINITY_DN14117_c0_g2	putative transcription factor bHLH family [Medicago truncatula]	BHLH25	GO:0003677(DNA binding);GO:0003700(DNA binding transcription factor activity);GO:0005634(nucleus);GO:0006351(transcription, DNA-templated);GO:0006355(regulation of transcription, DNA-templated);GO:0046983(protein dimerization activity)	eus04016(MAPK signaling pathway - plant);eus04075(Plant hormone signal transduction)	119	2.5	NA	3	2	0	61.13	337.64	0	0	yes
mtr-miR2612_L+2R-2	TRINITY_DN14117_c0_g3	putative transcription factor bHLH family [Medicago truncatula]	-	-	-	601	2	2	3	3	201.69	61.13	67.53	0	0	yes
mtr-miR2612_L+2R-2	TRINITY_DN17628_c0_g1	SWR1-complex protein 4 [Medicago truncatula]	SWC4	GO:0003714(transcription corepressor activity);GO:0035267(NuA4 histone acetyltransferase complex);GO:0043967(histone H4 acetylation);GO:0043968(histone H2A acetylation)	NA(NA)	556	3	NA	4	NA	0	30.56	0	0	0	yes
mtr-miR2612_L+2R-2	TRINITY_DN25283_c0_g4	putative transcription factor bHLH family [Medicago truncatula]	BHLH25	GO:0003677(DNA binding);GO:0003700(DNA binding transcription factor activity);GO:0005634(nucleus);GO:0006351(transcription, DNA-templated);GO:0006355(regulation of transcription, DNA-templated);GO:0046983(protein dimerization activity)	dct04016(MAPK signaling pathway - plant);dct04075(Plant hormone signal transduction)	86	2.5	0	2	2	201.69	61.13	101.29	0	0	yes
mtr-miR2612_L+2R-2	TRINITY_DN25283_c0_g5	transcription factor bHLH19 [Medicago truncatula]	BHLH25	GO:0003677(DNA binding);GO:0003700(DNA binding transcription factor activity);GO:0005634(nucleus);GO:0006351(transcription, DNA-templated);GO:0006355(regulation of transcription, DNA-templated);GO:0046983(protein dimerization activity)	pda04016(MAPK signaling pathway - plant);pda04075(Plant hormone signal transduction)	613	0	3	1	NA	161.36	91.69	0	0	0	yes
mtr-miR319a-3p	TRINITY_DN15741_c0_g2	putative transcription factor TCP family [Medicago truncatula]	TCP2	GO:0003677(DNA binding);GO:0003700(DNA binding transcription factor activity);GO:0005515(protein binding);GO:0005634(nucleus);GO:0006351(transcription, DNA-templated);GO:0006355(regulation of transcription, DNA-templated);GO:0009637(response to blue light);GO:0009965(leaf morphogenesis);GO:0030154(cell differentiation);GO:0045962(positive regulation of development, heterochronic);GO:0048366(leaf …	-	2032	2.5	2	2	2	161.36	122.25	236.35	0	0	yes
mtr-miR319a-3p	TRINITY_DN16207_c1_g2	transcription factor MYB65 [Medicago truncatula]	GAM1	GO:0000981(RNA polymerase II transcription factor activity, sequence-specific DNA binding);GO:0001135(transcription factor activity, RNA polymerase II transcription factor recruiting);GO:0003677(DNA binding);GO:0003700(DNA binding transcription factor activity);GO:0005634(nucleus);GO:0006351(transcription, DNA-templated);GO:0006355(regulation of transcription, DNA-templated);GO:0006357(regulation…	NA(NA)	1515	3	NA	2	4	0	91.69	33.76	0	0	yes
mtr-miR393a_R+1	TRINITY_DN21628_c1_g1	protein TRANSPORT INHIBITOR RESPONSE 1 [Medicago truncatula]	TIR1	GO:0000822(inositol hexakisphosphate binding);GO:0009734(auxin-activated signaling pathway)	mtr04075(Plant hormone signal transduction)	1661	2	2	0	0	1210.17	1161.4	1316.81	0.01	0.01	yes
mtr-miR396a-3p_L-1	TRINITY_DN15401_c0_g2	-	-	-	-	161	1.5	NA	3	NA	0	61.13	0	0	0	yes
mtr-miR396a-5p	TRINITY_DN12598_c0_g1	cysteine proteinase COT44 [Medicago truncatula]	RD21B	GO:0004197(cysteine-type endopeptidase activity);GO:0005615(extracellular space);GO:0005764(lysosome);GO:0051603(proteolysis involved in cellular protein catabolic process)	mdm04145(Phagosome)	479	3	0	2	NA	201.69	61.13	0	0	0	yes
mtr-miR396a-5p	TRINITY_DN17385_c0_g2	nardilysin-like [Abrus precatorius]	At1g06900	GO:0004222(metalloendopeptidase activity);GO:0008270(zinc ion binding);GO:0016485(protein processing)	NA(NA)	1595	3.5	4	NA	NA	40.34	0	0	0	0	yes
mtr-miR396a-5p	TRINITY_DN20680_c0_g2	mRNA decay activator protein ZFP36 isoform X1 [Medicago truncatula]	-	GO:0003674(molecular_function);GO:0005634(nucleus);GO:0008150(biological_process)	NA(NA)	238	3.5	NA	NA	4	0	0	33.76	0	0	yes
mtr-miR396a-5p	TRINITY_DN20923_c1_g1	uncharacterized protein LOC112422001 [Medicago truncatula]	-	-	NA(NA)	1334	2.5	0	NA	NA	363.05	0	0	0	0	yes
mtr-miR396a-5p	TRINITY_DN23135_c0_g1	photosynthetic NDH subunit of subcomplex B 1, chloroplastic [Medicago truncatula]	PNSB1	GO:0009507(chloroplast);GO:0009534(chloroplast thylakoid);GO:0009535(chloroplast thylakoid membrane);GO:0009773(photosynthetic electron transport in photosystem I);GO:0010598(NAD(P)H dehydrogenase complex (plastoquinone))	-	1295	3.5	4	3	3	40.34	122.25	67.53	0	0	yes
mtr-miR396a-5p	TRINITY_DN23345_c0_g1	TPR repeat-containing thioredoxin TTL1 isoform X1 [Medicago truncatula]	TTL1	GO:0005634(nucleus);GO:0006970(response to osmotic stress);GO:0009651(response to salt stress);GO:0009737(response to abscisic acid);GO:0009738(abscisic acid-activated signaling pathway);GO:0009789(positive regulation of abscisic acid-activated signaling pathway);GO:0045454(cell redox homeostasis)	NA(NA)	786	3.5	4	NA	NA	40.34	0	0	0	0	yes
mtr-miR396a-5p	TRINITY_DN24714_c0_g1	long chain acyl-CoA synthetase 1 [Medicago truncatula]	LACS1	GO:0004467(long-chain fatty acid-CoA ligase activity);GO:0005524(ATP binding);GO:0005634(nucleus);GO:0005783(endoplasmic reticulum);GO:0006631(fatty acid metabolic process);GO:0006633(fatty acid biosynthetic process);GO:0008152(metabolic process);GO:0010025(wax biosynthetic process);GO:0010143(cutin biosynthetic process);GO:0016874(ligase activity);GO:0031957(very long-chain fatty acid-CoA ligase…	mtr00061(Fatty acid biosynthesis);mtr00071(Fatty acid degradation);mtr04146(Peroxisome)	1287	3.5	4	NA	2	40.34	0	168.82	0	0	yes
mtr-miR396b-5p	TRINITY_DN15401_c0_g2	-	-	-	-	247	2.5	0	0	0	2339.65	2506.19	3680.32	0	0	yes
mtr-miR398b	TRINITY_DN21348_c0_g1	peptidyl-prolyl cis-trans isomerase FKBP42 [Medicago truncatula]	FKBP42	GO:0003755(peptidyl-prolyl cis-trans isomerase activity);GO:0005528(FK506 binding);GO:0005789(endoplasmic reticulum membrane);GO:0061077(chaperone-mediated protein folding)	NA(NA)	379	3.5	2	2	NA	161.36	152.82	0	0	0	yes
mtr-miR399l	TRINITY_DN16250_c0_g1	putative aminoacyltransferase, E1 ubiquitin-activating enzyme [Medicago truncatula]	UBC24	GO:0005737(cytoplasm);GO:0031625(ubiquitin protein ligase binding);GO:0061630(ubiquitin protein ligase activity)	mtr04120(Ubiquitin mediated proteolysis)	1014	3	NA	4	NA	0	30.56	0	0	0	yes
mtr-miR399l	TRINITY_DN16250_c0_g1	putative aminoacyltransferase, E1 ubiquitin-activating enzyme [Medicago truncatula]	UBC24	GO:0005737(cytoplasm);GO:0031625(ubiquitin protein ligase binding);GO:0061630(ubiquitin protein ligase activity)	mtr04120(Ubiquitin mediated proteolysis)	955	3	2	4	4	80.68	30.56	33.76	0	0	yes
mtr-miR408-3p	TRINITY_DN16941_c0_g5	basic blue protein [Medicago truncatula]	-	GO:0046658(anchored component of plasma membrane)	-	191	2.5	2	2	2	1532.88	397.32	405.17	0	0	yes
mtr-miR5205a_R+1	TRINITY_DN25598_c1_g3	-	-	-	-	143	1.5	2	NA	NA	80.68	0	0	0	0	yes
mtr-miR5213-5p	TRINITY_DN14118_c0_g7	TMV resistance protein N [Medicago truncatula]	-	GO:0005737(cytoplasm);GO:0006952(defense response);GO:0007165(signal transduction);GO:0016021(integral component of membrane);GO:0043531(ADP binding)	NA(NA)	143	2	0	0	1	403.39	336.2	168.82	0	0	yes
mtr-miR5213-5p	TRINITY_DN14335_c2_g4	serine carboxypeptidase-like 45 [Medicago truncatula]	-	-	NA(NA)	226	3	NA	NA	0	0	0	675.29	0	0	yes
mtr-miR5213-5p	TRINITY_DN26397_c1_g4	TMV resistance protein N isoform X2 [Cicer arietinum]	-	GO:0005737(cytoplasm);GO:0006952(defense response);GO:0007165(signal transduction);GO:0043531(ADP binding)	NA(NA)	220	2	0	0	0	968.13	947.46	1046.7	0.06	0.06	yes
mtr-miR5234_L-2R+2	TRINITY_DN16215_c0_g1	stress response protein NST1 [Medicago truncatula]	ASIL2	GO:0003700(DNA binding transcription factor activity);GO:0005515(protein binding);GO:0005634(nucleus);GO:0006355(regulation of transcription, DNA-templated);GO:0043565(sequence-specific DNA binding)	-	1382	3.5	NA	3	2	0	61.13	135.06	0	0	yes
mtr-miR5559-5p	TRINITY_DN22893_c0_g1	protein SIEVE ELEMENT OCCLUSION B [Medicago truncatula]	SEOB	GO:0005634(nucleus);GO:0010088(phloem development);GO:0042803(protein homodimerization activity);GO:0043621(protein self-association)	-	1553	2.5	0	2	2	3993.55	336.2	202.59	0	0	yes
mtr-miR5559-5p	TRINITY_DN26009_c2_g2	protein SIEVE ELEMENT OCCLUSION B [Medicago truncatula]	SEOB	GO:0005634(nucleus);GO:0010088(phloem development);GO:0042803(protein homodimerization activity);GO:0043621(protein self-association)	-	1702	2	2	3	2	5607.1	91.69	540.23	0	0	yes
mtr-miR5753_R+3_1ss20AC	TRINITY_DN23596_c1_g3	-	-	-	-	16	1	NA	NA	4	0	0	33.76	0	0	yes
nta-miR482a	TRINITY_DN13124_c0_g5	metal tolerance protein 4-like isoform X1 [Cicer arietinum]	MTP4	GO:0005385(zinc ion transmembrane transporter activity);GO:0010043(response to zinc ion);GO:0016020(membrane);GO:0061088(regulation of sequestering of zinc ion)	-	304	1	0	0	0	1573.22	275.07	911.64	0	0	yes
nta-miR482a_R-3_1ss19CT	TRINITY_DN14166_c0_g2	glucan endo-1,3-beta-glucosidase 5 [Medicago truncatula]	At4g31140	GO:0004553(hydrolase activity, hydrolyzing O-glycosyl compounds);GO:0030247(polysaccharide binding);GO:0046658(anchored component of plasma membrane)	mtr00500(Starch and sucrose metabolism)	126	2.5	0	4	NA	161.36	30.56	0	0	0	yes
nta-miR482a_R-3_1ss19CT	TRINITY_DN15719_c0_g1	trihelix transcription factor ASIL2 isoform X2 [Medicago truncatula]	ASIL2	GO:0003700(DNA binding transcription factor activity);GO:0005515(protein binding);GO:0005634(nucleus);GO:0006355(regulation of transcription, DNA-templated)	-	908	2	NA	4	2	0	30.56	67.53	0	0	yes
nta-miR482a_R-3_1ss19CT	TRINITY_DN17046_c0_g1	CBL-interacting serine/threonine-protein kinase 5 [Medicago truncatula]	CIPK25	GO:0004674(protein serine/threonine kinase activity);GO:0005524(ATP binding);GO:0005622(intracellular);GO:0005886(plasma membrane);GO:0016301(kinase activity);GO:0018105(peptidyl-serine phosphorylation);GO:0018107(peptidyl-threonine phosphorylation);GO:0035556(intracellular signal transduction);GO:0050832(defense response to fungus)	NA(NA)	1427	3.5	2	2	2	1452.2	2659.01	438.94	0	0	yes
nta-miR482a_R-3_1ss19CT	TRINITY_DN20414_c0_g2	hypothetical protein MtrunA17_Chr5g0393391 [Medicago truncatula]	-	GO:0003674(molecular_function);GO:0005737(cytoplasm);GO:0005829(cytosol);GO:0008150(biological_process)	NA(NA)	1156	3	NA	2	NA	0	61.13	0	0	0	yes
nta-miR482a_R-3_1ss19CT	TRINITY_DN22294_c0_g1	UDP-glycosyltransferase 71K2 [Medicago truncatula]	UGT71K2	GO:0009813(flavonoid biosynthetic process);GO:0043231(intracellular membrane-bounded organelle);GO:0052696(flavonoid glucuronidation);GO:0080043(quercetin 3-O-glucosyltransferase activity);GO:0080044(quercetin 7-O-glucosyltransferase activity)	ccaj00130(Ubiquinone and other terpenoid-quinone biosynthesis)	1013	2.5	0	0	0	2501.01	3637.03	2498.57	0	0	yes
nta-miR482a_R-3_1ss19CT	TRINITY_DN22412_c0_g2	AT-rich interactive domain-containing protein 4 isoform X1 [Medicago truncatula]	ARID4	GO:0003677(DNA binding);GO:0005622(intracellular);GO:0005634(nucleus);GO:0006351(transcription, DNA-templated);GO:0006355(regulation of transcription, DNA-templated);GO:0046872(metal ion binding)	-	2238	3.5	NA	NA	4	0	0	33.76	0	0	yes
nta-miR482a_R-3_1ss19CT	TRINITY_DN25907_c0_g1	calmodulin-interacting protein 111-like protein, partial [Trifolium pratense]	CIP111	GO:0005516(calmodulin binding);GO:0005524(ATP binding);GO:0005634(nucleus);GO:0009507(chloroplast);GO:0009535(chloroplast thylakoid membrane);GO:0016887(ATPase activity)	lang03008(Ribosome biogenesis in eukaryotes)	1571	3.5	4	NA	4	40.34	0	33.76	0	0	yes
nta-miR482a_R-3_1ss19CT	TRINITY_DN27212_c0_g1	-	-	-	-	202	2	NA	NA	0	0	0	2194.69	0	0	yes
ppe-MIR169i-p5_2ss17GT19TG	TRINITY_DN12599_c1_g1	syntaxin-43 [Medicago truncatula]	SYP43	GO:0000149(SNARE binding);GO:0005484(SNAP receptor activity);GO:0006886(intracellular protein transport);GO:0006906(vesicle fusion);GO:0012505(endomembrane system);GO:0016021(integral component of membrane);GO:0031201(SNARE complex);GO:0048278(vesicle docking)	cam04130(SNARE interactions in vesicular transport)	905	3.5	4	NA	NA	40.34	0	0	0	0	yes
ppe-MIR169i-p5_2ss17GT19TG	TRINITY_DN12843_c0_g1	hypothetical protein L195_g057364, partial [Trifolium pratense]	-	-	-	64	2	NA	4	NA	0	30.56	0	0	0	yes
ppe-MIR169i-p5_2ss17GT19TG	TRINITY_DN13312_c0_g1	heavy metal-associated isoprenylated plant protein 39 [Medicago truncatula]	HIPP39	GO:0005737(cytoplasm);GO:0030001(metal ion transport);GO:0046914(transition metal ion binding);GO:0046916(cellular transition metal ion homeostasis)	pper00010(Glycolysis / Gluconeogenesis);pper00030(Pentose phosphate pathway);pper00051(Fructose and mannose metabolism);pper00710(Carbon fixation in photosynthetic organisms)	357	3	NA	3	NA	0	61.13	0	0	0	yes
ppe-MIR169i-p5_2ss17GT19TG	TRINITY_DN13312_c0_g3	heavy metal-associated isoprenylated plant protein 39 [Medicago truncatula]	HIPP39	GO:0005737(cytoplasm);GO:0030001(metal ion transport);GO:0046914(transition metal ion binding);GO:0046916(cellular transition metal ion homeostasis)	-	507	2.5	3	3	4	201.69	122.25	33.76	0	0	yes
ppe-MIR169i-p5_2ss17GT19TG	TRINITY_DN13312_c0_g3	heavy metal-associated isoprenylated plant protein 39 [Medicago truncatula]	HIPP39	GO:0005737(cytoplasm);GO:0030001(metal ion transport);GO:0046914(transition metal ion binding);GO:0046916(cellular transition metal ion homeostasis)	-	537	3.5	3	3	3	80.68	122.25	202.59	0	0	yes
ppe-MIR169i-p5_2ss17GT19TG	TRINITY_DN13312_c0_g5	heavy metal-associated isoprenylated plant protein 7 isoform X2 [Medicago truncatula]	HIPP07	GO:0005737(cytoplasm);GO:0030001(metal ion transport);GO:0046914(transition metal ion binding);GO:0046916(cellular transition metal ion homeostasis)	-	163	2.5	3	4	3	161.36	30.56	135.06	0	0	yes
ppe-MIR169i-p5_2ss17GT19TG	TRINITY_DN13646_c0_g2	probable histone H2B.3 [Medicago truncatula]	At5g22880	GO:0000788(nuclear nucleosome);GO:0003677(DNA binding);GO:0006334(nucleosome assembly)	NA(NA)	187	3	NA	NA	4	0	0	33.76	0	0	yes
ppe-MIR169i-p5_2ss17GT19TG	TRINITY_DN13783_c0_g6	heavy metal-associated isoprenylated plant protein 9 [Medicago truncatula]	HIPP09	GO:0005737(cytoplasm);GO:0030001(metal ion transport);GO:0046914(transition metal ion binding);GO:0046916(cellular transition metal ion homeostasis)	-	768	3.5	NA	NA	2	0	0	101.29	0	0	yes
ppe-MIR169i-p5_2ss17GT19TG	TRINITY_DN14304_c1_g2	structure-specific endonuclease subunit SLX1 homolog [Medicago truncatula]	Slx1b	GO:0004518(nuclease activity);GO:0005622(intracellular);GO:0005634(nucleus);GO:0006281(DNA repair);GO:0017108(5'-flap endonuclease activity)	NA(NA)	1171	3	NA	NA	4	0	0	33.76	0	0	yes
ppe-MIR169i-p5_2ss17GT19TG	TRINITY_DN14865_c0_g1	hypothetical protein MtrunA17_Chr4g0002911 [Medicago truncatula]	At3g02645	GO:0003674(molecular_function);GO:0005886(plasma membrane);GO:0008150(biological_process);GO:0016021(integral component of membrane)	-	1375	3	NA	3	NA	0	152.82	0	0	0	yes
ppe-MIR169i-p5_2ss17GT19TG	TRINITY_DN15422_c0_g1	uncharacterized protein LOC11406346 [Medicago truncatula]	-	GO:0003674(molecular_function);GO:0005634(nucleus);GO:0008150(biological_process)	-	135	3.5	NA	3	NA	0	61.13	0	0	0	yes
ppe-MIR169i-p5_2ss17GT19TG	TRINITY_DN15434_c0_g2	peptidyl-prolyl cis-trans isomerase FKBP62 [Medicago truncatula]	FKBP70	GO:0003755(peptidyl-prolyl cis-trans isomerase activity);GO:0005528(FK506 binding);GO:0005789(endoplasmic reticulum membrane);GO:0061077(chaperone-mediated protein folding)	NA(NA)	740	3.5	3	NA	4	80.68	0	33.76	0	0	yes
ppe-MIR169i-p5_2ss17GT19TG	TRINITY_DN16038_c0_g3	zinc finger protein JACKDAW [Medicago truncatula]	JKD	GO:0003676(nucleic acid binding);GO:0003677(DNA binding);GO:0003700(DNA binding transcription factor activity);GO:0005515(protein binding);GO:0005634(nucleus);GO:0006351(transcription, DNA-templated);GO:0006355(regulation of transcription, DNA-templated);GO:0008270(zinc ion binding);GO:0008356(asymmetric cell division);GO:0010075(regulation of meristem growth);GO:0042803(protein homodimerization …	lja00052(Galactose metabolism);lja00600(Sphingolipid metabolism);lja00531(Glycosaminoglycan degradation);lja00604(Glycosphingolipid biosynthesis - ganglio series);lja00511(Other glycan degradation)	440	3	NA	4	NA	0	30.56	0	0	0	yes
ppe-MIR169i-p5_2ss17GT19TG	TRINITY_DN16298_c0_g1	uncharacterized protein LOC11443147 [Medicago truncatula]	-	GO:0008150(biological_process);GO:0009507(chloroplast)	NA(NA)	410	3.5	4	4	2	40.34	30.56	236.35	0	0	yes
ppe-MIR169i-p5_2ss17GT19TG	TRINITY_DN16662_c0_g5	putative disease resistance protein RGA1 [Medicago truncatula]	RGA3	GO:0005515(protein binding);GO:0005524(ATP binding);GO:0005576(extracellular region);GO:0006952(defense response);GO:0043531(ADP binding)	NA(NA)	292	3	NA	NA	4	0	0	33.76	0	0	yes
ppe-MIR169i-p5_2ss17GT19TG	TRINITY_DN16922_c0_g1	calcium-transporting ATPase 8, plasma membrane-type isoform X1 [Medicago truncatula]	ACA10	GO:0005388(calcium-transporting ATPase activity);GO:0005887(integral component of plasma membrane);GO:0043231(intracellular membrane-bounded organelle)	NA(NA)	614	2.5	NA	2	NA	0	91.69	0	0	0	yes
ppe-MIR169i-p5_2ss17GT19TG	TRINITY_DN16930_c0_g6	uncharacterized protein LOC11427773 [Medicago truncatula]	-	-	-	768	3.5	3	3	3	121.02	91.69	67.53	0	0	yes
ppe-MIR169i-p5_2ss17GT19TG	TRINITY_DN16980_c1_g3	protein LST8 homolog [Medicago truncatula]	lst8	GO:0000166(nucleotide binding);GO:0005515(protein binding);GO:0005737(cytoplasm);GO:0005768(endosome);GO:0016020(membrane);GO:0031929(TOR signaling);GO:0031931(TORC1 complex);GO:0031932(TORC2 complex);GO:0032008(positive regulation of TOR signaling);GO:0032956(regulation of actin cytoskeleton organization);GO:0048571(long-day photoperiodism);GO:0080008(Cul4-RING E3 ubiquitin ligase complex);GO:19…	mtr04136(Autophagy - other eukaryotes)	220	3.5	4	NA	4	40.34	0	33.76	0	0	yes
ppe-MIR169i-p5_2ss17GT19TG	TRINITY_DN17021_c0_g3	-	-	-	-	198	3.5	3	NA	NA	80.68	0	0	0	0	yes
ppe-MIR169i-p5_2ss17GT19TG	TRINITY_DN17047_c1_g1	putative peptidylprolyl isomerase [Medicago truncatula]	CYP23	GO:0003755(peptidyl-prolyl cis-trans isomerase activity)	-	400	3.5	4	NA	NA	40.34	0	0	0	0	yes
ppe-MIR169i-p5_2ss17GT19TG	TRINITY_DN17108_c3_g1	probable transcription factor KAN2 [Medicago truncatula]	KAN2	GO:0005634(nucleus);GO:0006355(regulation of transcription, DNA-templated);GO:0044212(transcription regulatory region DNA binding)	ats04075(Plant hormone signal transduction)	1716	3	2	4	2	80.68	30.56	168.82	0	0	yes
ppe-MIR169i-p5_2ss17GT19TG	TRINITY_DN17396_c0_g1	myb family transcription factor PHL8 [Medicago truncatula]	PHL8	GO:0003700(DNA binding transcription factor activity);GO:0005634(nucleus);GO:0006355(regulation of transcription, DNA-templated)	cvr04933(AGE-RAGE signaling pathway in diabetic complications)	938	3	NA	NA	2	0	0	101.29	0	0	yes
ppe-MIR169i-p5_2ss17GT19TG	TRINITY_DN17495_c0_g1	thioredoxin [Medicago sativa]	-	GO:0000103(sulfate assimilation);GO:0005829(cytosol);GO:0005886(plasma membrane);GO:0006457(protein folding);GO:0015035(protein disulfide oxidoreductase activity);GO:0016671(oxidoreductase activity, acting on a sulfur group of donors, disulfide as acceptor);GO:0034599(cellular response to oxidative stress);GO:0045454(cell redox homeostasis);GO:0055114(oxidation-reduction process)	NA(NA)	23	3.5	3	NA	3	80.68	0	67.53	0	0	yes
ppe-MIR169i-p5_2ss17GT19TG	TRINITY_DN17836_c0_g1	axoneme-associated protein mst101(2) [Medicago truncatula]	-	-	-	510	3.5	NA	3	NA	0	61.13	0	0	0	yes
ppe-MIR169i-p5_2ss17GT19TG	TRINITY_DN18027_c0_g3	PREDICTED: 40S ribosomal protein S8-like [Lupinus angustifolius]	RPS8	GO:0000462(maturation of SSU-rRNA from tricistronic rRNA transcript (SSU-rRNA, 5.8S rRNA, LSU-rRNA));GO:0003735(structural constituent of ribosome);GO:0022627(cytosolic small ribosomal subunit)	lang03010(Ribosome)	114	3	NA	2	3	0	122.25	67.53	0	0	yes
ppe-MIR169i-p5_2ss17GT19TG	TRINITY_DN18118_c0_g1	3'-5' exoribonuclease 1-like [Medicago truncatula]	ERI2	GO:0004674(protein serine/threonine kinase activity);GO:0005886(plasma membrane);GO:0006468(protein phosphorylation);GO:0006952(defense response);GO:0009506(plasmodesma)	NA(NA)	1491	3.5	2	2	2	322.71	152.82	506.47	0	0	yes
ppe-MIR169i-p5_2ss17GT19TG	TRINITY_DN18132_c0_g1	uncharacterized protein LOC25493003 [Medicago truncatula]	HMGIY2	GO:0000786(nucleosome);GO:0003677(DNA binding);GO:0005634(nucleus);GO:0006334(nucleosome assembly)	NA(NA)	1325	3.5	4	4	2	40.34	30.56	135.06	0	0	yes
ppe-MIR169i-p5_2ss17GT19TG	TRINITY_DN18240_c0_g1	pre-mRNA-processing protein 40A isoform X3 [Medicago truncatula]	PRP40A	GO:0000398(mRNA splicing, via spliceosome);GO:0003723(RNA binding);GO:0005685(U1 snRNP);GO:0071004(U2-type prespliceosome)	mtr03040(Spliceosome)	2888	3.5	3	NA	2	80.68	0	168.82	0	0	yes
ppe-MIR169i-p5_2ss17GT19TG	TRINITY_DN18346_c0_g4	uncharacterized protein LOC11435286 [Medicago truncatula]	-	-	-	71	3.5	NA	3	NA	0	61.13	0	0	0	yes
ppe-MIR169i-p5_2ss17GT19TG	TRINITY_DN18401_c0_g2	uncharacterized protein LOC11446958 [Medicago truncatula]	-	GO:0005516(calmodulin binding);GO:0005634(nucleus);GO:0005886(plasma membrane);GO:0008150(biological_process)	-	664	3.5	NA	4	NA	0	30.56	0	0	0	yes
ppe-MIR169i-p5_2ss17GT19TG	TRINITY_DN18513_c1_g5	putative chromatin remodeling SNF2 family [Medicago truncatula]	At3g54460	GO:0004386(helicase activity);GO:0005524(ATP binding);GO:0005634(nucleus);GO:0008270(zinc ion binding);GO:0009506(plasmodesma)	NA(NA)	2196	2	4	NA	NA	40.34	0	0	0	0	yes
ppe-MIR169i-p5_2ss17GT19TG	TRINITY_DN18599_c0_g1	60S ribosomal protein L7 [Medicago truncatula]	RPL7B	GO:0000463(maturation of LSU-rRNA from tricistronic rRNA transcript (SSU-rRNA, 5.8S rRNA, LSU-rRNA));GO:0002181(cytoplasmic translation);GO:0003735(structural constituent of ribosome);GO:0022625(cytosolic large ribosomal subunit)	mtr03010(Ribosome)	513	3.5	NA	NA	3	0	0	101.29	0	0	yes
ppe-MIR169i-p5_2ss17GT19TG	TRINITY_DN18769_c0_g4	1-aminocyclopropane-1-carboxylate oxidase homolog 4 [Medicago truncatula]	At1g06620	GO:0051213(dioxygenase activity)	zma00402(Benzoxazinoid biosynthesis)	244	3.5	NA	4	NA	0	30.56	0	0	0	yes
ppe-MIR169i-p5_2ss17GT19TG	TRINITY_DN19093_c1_g3	probable alpha,alpha-trehalose-phosphate synthase [UDP-forming] 7 [Medicago truncatula]	TPS7	GO:0003825(alpha,alpha-trehalose-phosphate synthase (UDP-forming) activity);GO:0004805(trehalose-phosphatase activity);GO:0005634(nucleus);GO:0005829(cytosol);GO:0005992(trehalose biosynthetic process);GO:0016757(transferase activity, transferring glycosyl groups);GO:0016791(phosphatase activity);GO:0070413(trehalose metabolism in response to stress)	mtr00500(Starch and sucrose metabolism)	41	3.5	NA	NA	2	0	0	202.59	0	0	yes
ppe-MIR169i-p5_2ss17GT19TG	TRINITY_DN19147_c0_g1	ABC transporter C family member 3 isoform X1 [Medicago truncatula]	ABCC3	GO:0000325(plant-type vacuole);GO:0005524(ATP binding);GO:0005773(vacuole);GO:0005774(vacuolar membrane);GO:0005886(plasma membrane);GO:0008559(xenobiotic transmembrane transporting ATPase activity);GO:0009506(plasmodesma);GO:0010290(chlorophyll catabolite transmembrane transporter activity);GO:0015431(glutathione S-conjugate-exporting ATPase activity);GO:0016021(integral component of membrane);G…	cam02010(ABC transporters)	190	3	4	NA	2	40.34	0	67.53	0	0	yes
ppe-MIR169i-p5_2ss17GT19TG	TRINITY_DN19569_c0_g2	G-box-binding factor 1 isoform X1 [Medicago truncatula]	CPRF3	-	NA(NA)	1262	3.5	4	4	NA	40.34	30.56	0	0	0	yes
ppe-MIR169i-p5_2ss17GT19TG	TRINITY_DN19695_c0_g2	paramyosin [Medicago truncatula]	-	GO:0003674(molecular_function);GO:0008150(biological_process);GO:0009507(chloroplast)	NA(NA)	2449	3.5	NA	2	NA	0	122.25	0	0	0	yes
ppe-MIR169i-p5_2ss17GT19TG	TRINITY_DN20134_c0_g2	hypothetical protein MtrunA17_Chr2g0289251 [Medicago truncatula]	-	GO:0005739(mitochondrion)	-	598	3.5	4	4	NA	40.34	30.56	0	0	0	yes
ppe-MIR169i-p5_2ss17GT19TG	TRINITY_DN20559_c1_g2	CBL-interacting serine/threonine-protein kinase 6 [Medicago truncatula]	CIPK6	GO:0004674(protein serine/threonine kinase activity);GO:0005515(protein binding);GO:0005524(ATP binding);GO:0005622(intracellular);GO:0005783(endoplasmic reticulum);GO:0005886(plasma membrane);GO:0007275(multicellular organism development);GO:0009414(response to water deprivation);GO:0009651(response to salt stress);GO:0010540(basipetal auxin transport);GO:0016301(kinase activity);GO:0018105(pept…	NA(NA)	1179	3	2	2	2	726.1	1283.66	1553.16	0	0	yes
ppe-MIR169i-p5_2ss17GT19TG	TRINITY_DN20610_c0_g4	protein PALE CRESS, chloroplastic [Medicago truncatula]	PAC	GO:0009501(amyloplast);GO:0009507(chloroplast);GO:0009509(chromoplast);GO:0009513(etioplast);GO:0009537(proplastid);GO:0009658(chloroplast organization);GO:0009965(leaf morphogenesis);GO:0071482(cellular response to light stimulus)	-	382	3	NA	4	4	0	30.56	33.76	0	0	yes
ppe-MIR169i-p5_2ss17GT19TG	TRINITY_DN20612_c0_g1	UBX domain-containing protein 1 [Medicago truncatula]	UBXN6	GO:0003676(nucleic acid binding);GO:0005737(cytoplasm);GO:0005829(cytosol);GO:0008150(biological_process)	cit04141(Protein processing in endoplasmic reticulum)	1232	3.5	2	2	2	524.41	213.94	371.41	0	0	yes
ppe-MIR169i-p5_2ss17GT19TG	TRINITY_DN20860_c0_g1	putative polyketide cyclase/dehydrase, START-like domain-containing protein [Medicago truncatula]	PYL9	GO:0004864(protein phosphatase inhibitor activity);GO:0005634(nucleus);GO:0005737(cytoplasm);GO:0009738(abscisic acid-activated signaling pathway);GO:0010427(abscisic acid binding);GO:0080163(regulation of protein serine/threonine phosphatase activity)	mtr04016(MAPK signaling pathway - plant);mtr04075(Plant hormone signal transduction)	238	2.5	2	4	2	80.68	30.56	101.29	0	0	yes
ppe-MIR169i-p5_2ss17GT19TG	TRINITY_DN20933_c1_g1	chromatin assembly factor 1 subunit FAS1 [Medicago truncatula]	FAS1	GO:0005634(nucleus);GO:0006334(nucleosome assembly);GO:0033186(CAF-1 complex)	NA(NA)	330	3.5	3	NA	4	80.68	0	33.76	0	0	yes
ppe-MIR169i-p5_2ss17GT19TG	TRINITY_DN21012_c0_g1	protein SGT1 homolog A [Medicago truncatula]	SGT1	GO:0005515(protein binding);GO:0005634(nucleus);GO:0005737(cytoplasm);GO:0042742(defense response to bacterium);GO:0050832(defense response to fungus)	mtr04626(Plant-pathogen interaction)	1194	3.5	2	2	2	282.37	275.07	472.7	0	0	yes
ppe-MIR169i-p5_2ss17GT19TG	TRINITY_DN21052_c0_g2	leucine-rich repeat protein 2 [Medicago truncatula]	SERK2	GO:0004675(transmembrane receptor protein serine/threonine kinase activity);GO:0005515(protein binding);GO:0005524(ATP binding);GO:0005886(plasma membrane);GO:0006468(protein phosphorylation);GO:0007166(cell surface receptor signaling pathway);GO:0008289(lipid binding);GO:0009556(microsporogenesis);GO:0009742(brassinosteroid mediated signaling pathway);GO:0010152(pollen maturation);GO:0016021(int…	NA(NA)	12	3.5	4	NA	NA	40.34	0	0	0	0	yes
ppe-MIR169i-p5_2ss17GT19TG	TRINITY_DN21120_c0_g1	Heavy metal-associated isoprenylated plant protein 39, partial [Mucuna pruriens]	HIPP39	GO:0005737(cytoplasm);GO:0030001(metal ion transport);GO:0046914(transition metal ion binding);GO:0046916(cellular transition metal ion homeostasis)	-	342	3	3	3	2	80.68	213.94	742.82	0	0	yes
ppe-MIR169i-p5_2ss17GT19TG	TRINITY_DN21122_c0_g2	uncharacterized protein LOC11412675 [Medicago truncatula]	BFRUCT1	-	mtr00052(Galactose metabolism);mtr00500(Starch and sucrose metabolism)	354	3.5	NA	4	NA	0	30.56	0	0	0	yes
ppe-MIR169i-p5_2ss17GT19TG	TRINITY_DN21150_c0_g2	DEAD-box ATP-dependent RNA helicase 13 [Medicago truncatula]	RH13	GO:0004004(ATP-dependent RNA helicase activity);GO:0010501(RNA secondary structure unwinding)	NA(NA)	2439	1.5	NA	NA	3	0	0	67.53	0	0	yes
ppe-MIR169i-p5_2ss17GT19TG	TRINITY_DN21152_c0_g1	calreticulin isoform X1 [Medicago truncatula]	-	GO:0005788(endoplasmic reticulum lumen)	mtr04141(Protein processing in endoplasmic reticulum);mtr04145(Phagosome)	1164	3	3	3	4	201.69	213.94	33.76	0	0	yes
ppe-MIR169i-p5_2ss17GT19TG	TRINITY_DN21409_c0_g2	unknown [Medicago truncatula]	Os01g0270100	GO:0002020(protease binding);GO:0004869(cysteine-type endopeptidase inhibitor activity);GO:0005515(protein binding);GO:0005576(extracellular region);GO:0005783(endoplasmic reticulum);GO:0005829(cytosol);GO:0006952(defense response);GO:0006972(hyperosmotic response);GO:0006979(response to oxidative stress);GO:0009409(response to cold);GO:0009414(response to water deprivation);GO:0050897(cobalt ion…	NA(NA)	1691	3.5	4	NA	3	40.34	0	67.53	0	0	yes
ppe-MIR169i-p5_2ss17GT19TG	TRINITY_DN21420_c0_g1	FKBP-type peptidyl-prolyl cis-trans isomerase [Medicago truncatula]	FKBP43	GO:0003755(peptidyl-prolyl cis-trans isomerase activity);GO:0005528(FK506 binding);GO:0005789(endoplasmic reticulum membrane);GO:0061077(chaperone-mediated protein folding)	NA(NA)	1655	3.5	NA	NA	4	0	0	33.76	0	0	yes
ppe-MIR169i-p5_2ss17GT19TG	TRINITY_DN21588_c0_g2	crocetin glucosyltransferase, chloroplastic [Cicer arietinum]	UGT75L6	GO:0009813(flavonoid biosynthetic process);GO:0043231(intracellular membrane-bounded organelle);GO:0052696(flavonoid glucuronidation);GO:0080043(quercetin 3-O-glucosyltransferase activity);GO:0080044(quercetin 7-O-glucosyltransferase activity)	NA(NA)	1063	3	NA	3	4	0	91.69	33.76	0	0	yes
ppe-MIR169i-p5_2ss17GT19TG	TRINITY_DN21884_c0_g1	vesicle-associated protein 4-2 [Medicago truncatula]	PVA42	GO:0009739(response to gibberellin)	ghi00020(Citrate cycle (TCA cycle));ghi00630(Glyoxylate and dicarboxylate metabolism)	949	3	2	3	2	201.69	91.69	168.82	0	0	yes
ppe-MIR169i-p5_2ss17GT19TG	TRINITY_DN21884_c0_g2	vesicle-associated protein 4-2 [Medicago truncatula]	PVA42	GO:0009739(response to gibberellin)	ghi00020(Citrate cycle (TCA cycle));ghi00630(Glyoxylate and dicarboxylate metabolism)	535	3.5	4	NA	4	40.34	0	33.76	0	0	yes
ppe-MIR169i-p5_2ss17GT19TG	TRINITY_DN22108_c0_g1	PREDICTED: uncharacterized protein LOC108319572 [Vigna angularis]	HIS2B	GO:0000788(nuclear nucleosome);GO:0003677(DNA binding);GO:0006334(nucleosome assembly)	NA(NA)	214	3.5	0	NA	NA	363.05	0	0	0	0	yes
ppe-MIR169i-p5_2ss17GT19TG	TRINITY_DN22138_c0_g2	RNA-binding protein 39 [Medicago truncatula]	RBM39	GO:0003676(nucleic acid binding);GO:0005634(nucleus);GO:0006397(mRNA processing)	NA(NA)	420	3.5	NA	4	2	0	30.56	135.06	0	0	yes
ppe-MIR169i-p5_2ss17GT19TG	TRINITY_DN22626_c0_g2	probable serine/threonine-protein kinase At1g54610 isoform X2 [Medicago truncatula]	At1g54610	GO:0004693(cyclin-dependent protein serine/threonine kinase activity);GO:0005515(protein binding);GO:0005524(ATP binding);GO:0005886(plasma membrane);GO:0016301(kinase activity)	NA(NA)	386	3.5	NA	4	NA	0	30.56	0	0	0	yes
ppe-MIR169i-p5_2ss17GT19TG	TRINITY_DN22632_c1_g1	heavy metal-associated isoprenylated plant protein 6 [Medicago truncatula]	HIPP05	GO:0005737(cytoplasm);GO:0030001(metal ion transport);GO:0046914(transition metal ion binding);GO:0046916(cellular transition metal ion homeostasis)	-	1081	3	4	3	3	40.34	213.94	67.53	0	0	yes
ppe-MIR169i-p5_2ss17GT19TG	TRINITY_DN22642_c0_g4	RNA polymerase II transcriptional coactivator KELP isoform X1 [Medicago truncatula]	KELP	GO:0003677(DNA binding);GO:0003713(transcription coactivator activity);GO:0005515(protein binding);GO:0005634(nucleus);GO:0005667(transcription factor complex);GO:0006351(transcription, DNA-templated);GO:0006355(regulation of transcription, DNA-templated);GO:0060261(positive regulation of transcription initiation from RNA polymerase II promoter)	-	147	3.5	NA	NA	2	0	0	67.53	0	0	yes
ppe-MIR169i-p5_2ss17GT19TG	TRINITY_DN22714_c0_g4	serine carboxypeptidase-like 25 [Medicago truncatula]	SCPL25	GO:0004185(serine-type carboxypeptidase activity);GO:0005773(vacuole);GO:0009742(brassinosteroid mediated signaling pathway);GO:0051603(proteolysis involved in cellular protein catabolic process)	NA(NA)	1691	3.5	NA	4	NA	0	30.56	0	0	0	yes
ppe-MIR169i-p5_2ss17GT19TG	TRINITY_DN22716_c0_g1	pentatricopeptide repeat-containing protein At4g18975, chloroplastic isoform X1 [Medicago truncatula]	At4g18975	GO:0003674(molecular_function);GO:0008150(biological_process);GO:0009451(RNA modification);GO:0009507(chloroplast)	NA(NA)	806	3.5	4	NA	NA	40.34	0	0	0	0	yes
ppe-MIR169i-p5_2ss17GT19TG	TRINITY_DN22816_c0_g2	-	-	-	-	31	3	4	2	3	40.34	213.94	67.53	0	0	yes
ppe-MIR169i-p5_2ss17GT19TG	TRINITY_DN22936_c0_g4	probable WRKY transcription factor 75 [Medicago truncatula]	WRKY75	GO:0000122(negative regulation of transcription by RNA polymerase II);GO:0000978(RNA polymerase II proximal promoter sequence-specific DNA binding);GO:0003700(DNA binding transcription factor activity);GO:0005634(nucleus);GO:0006351(transcription, DNA-templated);GO:0006355(regulation of transcription, DNA-templated);GO:0010055(atrichoblast differentiation);GO:0032107(regulation of response to nut…	lang04016(MAPK signaling pathway - plant);lang04626(Plant-pathogen interaction)	278	1.5	2	NA	NA	80.68	0	0	0	0	yes
ppe-MIR169i-p5_2ss17GT19TG	TRINITY_DN23001_c0_g2	peptidyl-prolyl cis-trans isomerase CYP95 isoform X1 [Medicago truncatula]	CYP95	GO:0003755(peptidyl-prolyl cis-trans isomerase activity)	NA(NA)	736	3.5	2	4	2	121.02	30.56	101.29	0	0	yes
ppe-MIR169i-p5_2ss17GT19TG	TRINITY_DN23054_c2_g2	aminomethyltransferase, mitochondrial isoform X1 [Medicago truncatula]	GDCST	GO:0005960(glycine cleavage complex)	mtr00630(Glyoxylate and dicarboxylate metabolism);mtr00260(Glycine, serine and threonine metabolism);mtr00670(One carbon pool by folate)	21	2.5	4	NA	NA	40.34	0	0	0	0	yes
ppe-MIR169i-p5_2ss17GT19TG	TRINITY_DN23194_c0_g1	probable ADP-ribosylation factor GTPase-activating protein AGD14 [Medicago truncatula]	AGD14	GO:0003924(GTPase activity);GO:0005096(GTPase activator activity);GO:0005525(GTP binding);GO:0005737(cytoplasm);GO:0005829(cytosol);GO:0006913(nucleocytoplasmic transport);GO:0009615(response to virus);GO:0046872(metal ion binding)	NA(NA)	380	3	4	4	2	40.34	30.56	101.29	0	0	yes
ppe-MIR169i-p5_2ss17GT19TG	TRINITY_DN23262_c0_g1	PWWP domain protein [Medicago truncatula]	-	GO:0003674(molecular_function);GO:0005634(nucleus);GO:0005730(nucleolus);GO:0009506(plasmodesma)	pmum03440(Homologous recombination)	2470	3.5	2	NA	NA	201.69	0	0	0	0	yes
ppe-MIR169i-p5_2ss17GT19TG	TRINITY_DN23262_c0_g1	PWWP domain protein [Medicago truncatula]	-	GO:0003674(molecular_function);GO:0005634(nucleus);GO:0005730(nucleolus);GO:0009506(plasmodesma)	pmum03440(Homologous recombination)	2500	3.5	NA	4	NA	0	30.56	0	0	0	yes
ppe-MIR169i-p5_2ss17GT19TG	TRINITY_DN23614_c0_g1	putative WW domain, FF domain-containing protein [Medicago truncatula]	PRP40A	GO:0000398(mRNA splicing, via spliceosome);GO:0003723(RNA binding);GO:0005685(U1 snRNP);GO:0071004(U2-type prespliceosome)	mtr03040(Spliceosome)	2497	3.5	3	4	3	161.36	30.56	168.82	0	0	yes
ppe-MIR169i-p5_2ss17GT19TG	TRINITY_DN23708_c0_g1	homeobox-DDT domain protein RLT3 isoform X1 [Medicago truncatula]	RLT3	GO:0003700(DNA binding transcription factor activity);GO:0005515(protein binding);GO:0005634(nucleus);GO:0006355(regulation of transcription, DNA-templated);GO:0010228(vegetative to reproductive phase transition of meristem)	-	2276	3.5	NA	NA	2	0	0	67.53	0	0	yes
ppe-MIR169i-p5_2ss17GT19TG	TRINITY_DN24027_c0_g1	factor of DNA methylation 4 [Medicago truncatula]	FDM4	GO:0004526(ribonuclease P activity);GO:0005655(nucleolar ribonuclease P complex);GO:0090502(RNA phosphodiester bond hydrolysis, endonucleolytic)	-	185	3	4	3	NA	40.34	61.13	0	0	0	yes
ppe-MIR169i-p5_2ss17GT19TG	TRINITY_DN24258_c0_g3	Integrase, catalytic region [Medicago truncatula]	-	-	NA(NA)	1762	3	NA	NA	4	0	0	33.76	0	0	yes
ppe-MIR169i-p5_2ss17GT19TG	TRINITY_DN24349_c0_g1	pre-mRNA-splicing factor SLU7-A [Medicago truncatula]	At1g65660	GO:0000386(second spliceosomal transesterification activity);GO:0005681(spliceosomal complex)	mtr03040(Spliceosome)	1576	2.5	2	2	2	282.37	213.94	641.52	0	0	yes
ppe-MIR169i-p5_2ss17GT19TG	TRINITY_DN24353_c0_g1	hypothetical protein MtrunA17_Chr6g0461251 [Medicago truncatula]	-	-	-	1016	2	4	3	3	40.34	152.82	236.35	0	0	yes
ppe-MIR169i-p5_2ss17GT19TG	TRINITY_DN24365_c0_g1	translation factor GUF1 homolog, chloroplastic [Medicago truncatula]	VITISV_013255	GO:0003924(GTPase activity);GO:0005622(intracellular);GO:0006412(translation)	NA(NA)	2082	3	NA	4	NA	0	30.56	0	0	0	yes
ppe-MIR169i-p5_2ss17GT19TG	TRINITY_DN24621_c0_g1	ribulose-1,5 bisphosphate carboxylase/oxygenase large subunit N-methyltransferase, chloroplastic [Medicago truncatula]	RBCMT	GO:0009570(chloroplast stroma);GO:0016279(protein-lysine N-methyltransferase activity);GO:0018023(peptidyl-lysine trimethylation);GO:0018026(peptidyl-lysine monomethylation)	NA(NA)	1781	3.5	3	2	NA	80.68	61.13	0	0	0	yes
ppe-MIR169i-p5_2ss17GT19TG	TRINITY_DN24694_c1_g2	T-complex protein 1 subunit beta [Medicago truncatula]	CCT2	GO:0005524(ATP binding);GO:0005618(cell wall);GO:0005737(cytoplasm);GO:0005829(cytosol);GO:0046658(anchored component of plasma membrane)	NA(NA)	146	3	4	4	2	40.34	30.56	202.59	0	0	yes
ppe-MIR169i-p5_2ss17GT19TG	TRINITY_DN24938_c0_g1	FACT complex subunit SPT16 [Medicago truncatula]	SPT16	GO:0005634(nucleus);GO:0005719(nuclear euchromatin);GO:0005730(nucleolus);GO:0005829(cytosol);GO:0006260(DNA replication);GO:0006281(DNA repair);GO:0006368(transcription elongation from RNA polymerase II promoter);GO:0010228(vegetative to reproductive phase transition of meristem);GO:0031491(nucleosome binding);GO:0032968(positive regulation of transcription elongation from RNA polymerase II prom…	NA(NA)	2696	3.5	3	NA	NA	80.68	0	0	0	0	yes
ppe-MIR169i-p5_2ss17GT19TG	TRINITY_DN25034_c1_g1	probable nucleolar protein 5-1 [Medicago truncatula]	NOP5-1	GO:0000154(rRNA modification);GO:0030515(snoRNA binding);GO:0031428(box C/D snoRNP complex);GO:0032040(small-subunit processome)	mtr03008(Ribosome biogenesis in eukaryotes)	1533	3	2	3	3	363.05	244.51	303.88	0	0	yes
ppe-MIR169i-p5_2ss17GT19TG	TRINITY_DN25034_c1_g3	-	-	-	-	126	3	2	2	2	564.74	275.07	472.7	0	0	yes
ppe-MIR169i-p5_2ss17GT19TG	TRINITY_DN25150_c0_g3	E3 ubiquitin-protein ligase CSU1 [Medicago truncatula]	nosip	GO:0005634(nucleus);GO:0007165(signal transduction);GO:0009640(photomorphogenesis);GO:0016567(protein ubiquitination);GO:0016607(nuclear speck);GO:0031648(protein destabilization);GO:0035091(phosphatidylinositol binding);GO:0046872(metal ion binding);GO:0061630(ubiquitin protein ligase activity)	NA(NA)	405	2.5	NA	4	NA	0	30.56	0	0	0	yes
ppe-MIR169i-p5_2ss17GT19TG	TRINITY_DN25182_c0_g1	phospholipid-transporting ATPase 1 isoform X1 [Medicago truncatula]	ALA1	GO:0004012(phospholipid-translocating ATPase activity);GO:0005886(plasma membrane)	NA(NA)	22	2.5	4	NA	NA	40.34	0	0	0	0	yes
ppe-MIR169i-p5_2ss17GT19TG	TRINITY_DN25289_c0_g1	protein CROWDED NUCLEI 4 [Medicago truncatula]	CRWN4	GO:0005515(protein binding);GO:0005634(nucleus);GO:0005652(nuclear lamina);GO:0005654(nucleoplasm);GO:0005737(cytoplasm);GO:0006997(nucleus organization);GO:0008483(transaminase activity);GO:0009507(chloroplast);GO:0010369(chromocenter);GO:0031965(nuclear membrane);GO:0034399(nuclear periphery);GO:0097298(regulation of nucleus size)	thj00270(Cysteine and methionine metabolism);thj00280(Valine, leucine and isoleucine degradation);thj00290(Valine, leucine and isoleucine biosynthesis);thj00770(Pantothenate and CoA biosynthesis)	3615	3	NA	4	NA	0	30.56	0	0	0	yes
ppe-MIR169i-p5_2ss17GT19TG	TRINITY_DN25292_c1_g2	stem-specific protein TSJT1 [Medicago truncatula]	TSJT1	GO:0004066(asparagine synthase (glutamine-hydrolyzing) activity);GO:0005829(cytosol);GO:0006529(asparagine biosynthetic process);GO:0006541(glutamine metabolic process);GO:0042803(protein homodimerization activity)	-	11	3	NA	NA	2	0	0	101.29	0	0	yes
ppe-MIR169i-p5_2ss17GT19TG	TRINITY_DN25297_c1_g2	AAA-ATPase ASD, mitochondrial [Medicago truncatula]	AATP1	GO:0005524(ATP binding);GO:0005739(mitochondrion);GO:0005783(endoplasmic reticulum);GO:0005886(plasma membrane);GO:0009409(response to cold);GO:0009414(response to water deprivation);GO:0009651(response to salt stress);GO:0009737(response to abscisic acid);GO:0010154(fruit development);GO:0010431(seed maturation);GO:0016021(integral component of membrane);GO:0016887(ATPase activity);GO:0031966(mi…	NA(NA)	381	3.5	3	2	3	201.69	1589.29	303.88	0	0	yes
ppe-MIR169i-p5_2ss17GT19TG	TRINITY_DN25328_c1_g1	PREDICTED: transcription factor MYB48 isoform X1 [Eucalyptus grandis]	MYB48	GO:0000981(RNA polymerase II transcription factor activity, sequence-specific DNA binding);GO:0001135(transcription factor activity, RNA polymerase II transcription factor recruiting);GO:0003677(DNA binding);GO:0003700(DNA binding transcription factor activity);GO:0005634(nucleus);GO:0006351(transcription, DNA-templated);GO:0006355(regulation of transcription, DNA-templated);GO:0006357(regulation…	NA(NA)	179	2.5	NA	2	4	0	244.51	33.76	0	0	yes
ppe-MIR169i-p5_2ss17GT19TG	TRINITY_DN25860_c0_g1	COP1-interactive protein 1 [Medicago truncatula]	-	GO:0003779(actin binding);GO:0005773(vacuole);GO:0005774(vacuolar membrane);GO:0008150(biological_process)	NA(NA)	1624	3.5	4	4	NA	40.34	30.56	0	0	0	yes
ppe-MIR169i-p5_2ss17GT19TG	TRINITY_DN25994_c1_g2	DEAD-box ATP-dependent RNA helicase 42 [Medicago truncatula]	RH45	GO:0000398(mRNA splicing, via spliceosome);GO:0004004(ATP-dependent RNA helicase activity);GO:0010468(regulation of gene expression);GO:0010501(RNA secondary structure unwinding)	mtr03040(Spliceosome)	529	3.5	3	3	2	80.68	61.13	168.82	0	0	yes
ppe-MIR169i-p5_2ss17GT19TG	TRINITY_DN26057_c1_g1	proteoglycan 4 [Medicago truncatula]	-	GO:0003674(molecular_function);GO:0005634(nucleus);GO:0009408(response to heat);GO:0016020(membrane);GO:0016021(integral component of membrane)	brp04141(Protein processing in endoplasmic reticulum)	548	3.5	2	NA	NA	121.02	0	0	0	0	yes
ppe-MIR169i-p5_2ss17GT19TG	TRINITY_DN26094_c0_g1	transcription initiation factor TFIID subunit 1 isoform X2 [Medicago truncatula]	TAF1	GO:0003677(DNA binding);GO:0004402(histone acetyltransferase activity);GO:0005634(nucleus);GO:0005669(transcription factor TFIID complex);GO:0009294(DNA mediated transformation);GO:0017025(TBP-class protein binding);GO:0043565(sequence-specific DNA binding);GO:0045944(positive regulation of transcription by RNA polymerase II)	mtr03022(Basal transcription factors)	5735	3	4	3	4	40.34	61.13	33.76	0.01	0.01	yes
ppe-MIR169i-p5_2ss17GT19TG	TRINITY_DN26260_c0_g2	protein CROWDED NUCLEI 1 isoform X1 [Medicago truncatula]	CRWN1	GO:0005634(nucleus);GO:0005652(nuclear lamina);GO:0005829(cytosol);GO:0006997(nucleus organization);GO:0034399(nuclear periphery)	bna00270(Cysteine and methionine metabolism);bna00280(Valine, leucine and isoleucine degradation);bna00290(Valine, leucine and isoleucine biosynthesis);bna00770(Pantothenate and CoA biosynthesis)	1958	3.5	2	2	3	121.02	244.51	67.53	0	0	yes
ppe-MIR169i-p5_2ss17GT19TG	TRINITY_DN26360_c2_g1	pentatricopeptide repeat-containing protein At1g79540 [Medicago truncatula]	-	-	NA(NA)	2342	2.5	4	NA	4	40.34	0	33.76	0	0	yes
ptc-miR472a_R-1_2ss2TC10CT	TRINITY_DN25767_c0_g2	TMV resistance protein N [Medicago truncatula]	At4g11170	GO:0006952(defense response);GO:0007165(signal transduction);GO:0043531(ADP binding)	NA(NA)	349	0	NA	4	NA	0	30.56	0	0	0	yes
pvu-miR319c_L-1R+1_1ss14AT	TRINITY_DN15741_c0_g2	putative transcription factor TCP family [Medicago truncatula]	TCP2	GO:0003677(DNA binding);GO:0003700(DNA binding transcription factor activity);GO:0005515(protein binding);GO:0005634(nucleus);GO:0006351(transcription, DNA-templated);GO:0006355(regulation of transcription, DNA-templated);GO:0009637(response to blue light);GO:0009965(leaf morphogenesis);GO:0030154(cell differentiation);GO:0045962(positive regulation of development, heterochronic);GO:0048366(leaf …	-	2031	3.5	NA	2	2	0	122.25	67.53	0	0	yes
pvu-miR319c_L-1R+1_1ss14AT	TRINITY_DN16807_c0_g1	transcription factor TCP4 [Medicago truncatula]	TCP3	GO:0003677(DNA binding);GO:0003700(DNA binding transcription factor activity);GO:0005634(nucleus);GO:0006351(transcription, DNA-templated);GO:0006355(regulation of transcription, DNA-templated);GO:0009733(response to auxin);GO:0009965(leaf morphogenesis);GO:0010150(leaf senescence);GO:0030154(cell differentiation);GO:0045962(positive regulation of development, heterochronic);GO:0048366(leaf devel…	-	1044	3.5	4	NA	2	40.34	0	67.53	0	0	yes
