# Supplementary material for: Utilization of Transcriptome, Small RNA, and Degradome Sequencing to Provide Insights Into Drought Stress and Rewatering Treatment in Medicago ruthenica
Source: Front Plant Sci. 2021 Aug 3;12:675903. doi: 10.3389/fpls.2021.675903 (PMC8369265; doi:10.3389/fpls.2021.675903)
Supplement: Supplementary file 10 [file Table_10.XLSX]

## Sheet: GO  enrichment
GO_ID	GO_Term	GO_function	GO_class	Genes	S gene number	TS gene number
GO:0005634	nucleus	cellular_component	6	TRINITY_DN19663_c0_g1;TRINITY_DN20680_c0_g2;TRINITY_DN22936_c0_g4;TRINITY_DN25655_c1_g1;TRINITY_DN16207_c1_g2;TRINITY_DN24164_c2_g1;TRINITY_DN20933_c1_g1;TRINITY_DN22709_c0_g1;TRINITY_DN22017_c0_g1;TRINITY_DN16807_c0_g1;TRINITY_DN25283_c0_g4;TRINITY_DN22590_c0_g2;TRINITY_DN25907_c0_g1;TRINITY_DN12590_c0_g1;TRINITY_DN16588_c0_g2;TRINITY_DN25328_c1_g1;TRINITY_DN20294_c0_g3;TRINITY_DN16207_c2_g1;TRI…	79	200
GO:0006355	regulation of transcription, DNA-templated	biological_process	8	TRINITY_DN24164_c2_g2;TRINITY_DN17108_c3_g1;TRINITY_DN25283_c0_g4;TRINITY_DN19663_c0_g7;TRINITY_DN15741_c0_g2;TRINITY_DN22642_c0_g4;TRINITY_DN24164_c2_g3;TRINITY_DN23959_c0_g5;TRINITY_DN22017_c0_g1;TRINITY_DN15719_c0_g1;TRINITY_DN16038_c0_g3;TRINITY_DN24440_c0_g3;TRINITY_DN16215_c0_g1;TRINITY_DN22590_c0_g2;TRINITY_DN14117_c0_g2;TRINITY_DN23708_c0_g1;TRINITY_DN20294_c0_g3;TRINITY_DN19308_c1_g2;TRI…	42	200
GO:0003677	DNA binding	molecular_function	6	TRINITY_DN24164_c2_g3;TRINITY_DN25283_c0_g4;TRINITY_DN20294_c0_g3;TRINITY_DN24440_c0_g3;TRINITY_DN15141_c0_g3;TRINITY_DN16207_c2_g1;TRINITY_DN25283_c0_g5;TRINITY_DN19663_c0_g7;TRINITY_DN19663_c0_g1;TRINITY_DN22322_c0_g1;TRINITY_DN24102_c0_g1;TRINITY_DN14117_c0_g2;TRINITY_DN23959_c0_g5;TRINITY_DN19663_c0_g3;TRINITY_DN22108_c0_g1;TRINITY_DN16207_c1_g2;TRINITY_DN13674_c0_g1;TRINITY_DN13158_c0_g1;TRI…	39	200
GO:0003700	DNA-binding transcription factor activity	molecular_function	4	TRINITY_DN19663_c0_g1;TRINITY_DN14117_c0_g2;TRINITY_DN22590_c0_g2;TRINITY_DN25283_c0_g4;TRINITY_DN19308_c1_g2;TRINITY_DN24164_c2_g2;TRINITY_DN25328_c1_g1;TRINITY_DN19663_c0_g7;TRINITY_DN16588_c0_g2;TRINITY_DN15719_c0_g1;TRINITY_DN13674_c0_g1;TRINITY_DN20294_c0_g3;TRINITY_DN19663_c0_g3;TRINITY_DN16038_c0_g3;TRINITY_DN23959_c0_g2;TRINITY_DN15741_c0_g2;TRINITY_DN25283_c0_g5;TRINITY_DN24102_c0_g1;TRI…	38	200
GO:0005737	cytoplasm	cellular_component	5	TRINITY_DN20648_c0_g1;TRINITY_DN16250_c0_g1;TRINITY_DN21386_c1_g2;TRINITY_DN22017_c0_g1;TRINITY_DN25289_c0_g1;TRINITY_DN19297_c0_g2;TRINITY_DN20612_c0_g1;TRINITY_DN14118_c0_g7;TRINITY_DN21120_c0_g1;TRINITY_DN23757_c0_g1;TRINITY_DN22632_c1_g1;TRINITY_DN26397_c1_g4;TRINITY_DN13919_c0_g5;TRINITY_DN15984_c0_g1;TRINITY_DN23194_c0_g1;TRINITY_DN21506_c0_g1;TRINITY_DN15250_c0_g1;TRINITY_DN20648_c0_g3;TRI…	35	200
GO:0006351	transcription, DNA-templated	biological_process	8	TRINITY_DN16207_c1_g2;TRINITY_DN24164_c2_g1;TRINITY_DN22028_c1_g1;TRINITY_DN19663_c0_g3;TRINITY_DN22322_c0_g1;TRINITY_DN24440_c0_g1;TRINITY_DN25328_c1_g1;TRINITY_DN16807_c0_g1;TRINITY_DN13674_c0_g1;TRINITY_DN21834_c0_g2;TRINITY_DN16207_c2_g1;TRINITY_DN15141_c0_g3;TRINITY_DN23959_c0_g2;TRINITY_DN25283_c0_g5;TRINITY_DN22017_c0_g1;TRINITY_DN14117_c0_g2;TRINITY_DN22936_c0_g4;TRINITY_DN24164_c2_g2;TRI…	33	200
GO:0005515	protein binding	molecular_function	4	TRINITY_DN22017_c0_g1;TRINITY_DN25655_c1_g1;TRINITY_DN19463_c0_g1;TRINITY_DN21186_c0_g1;TRINITY_DN19663_c0_g3;TRINITY_DN19663_c0_g1;TRINITY_DN21834_c0_g2;TRINITY_DN16215_c0_g1;TRINITY_DN21409_c0_g2;TRINITY_DN25308_c0_g1;TRINITY_DN12590_c0_g1;TRINITY_DN21052_c0_g2;TRINITY_DN23708_c0_g1;TRINITY_DN20559_c1_g2;TRINITY_DN25289_c0_g1;TRINITY_DN22642_c0_g4;TRINITY_DN16038_c0_g3;TRINITY_DN15741_c0_g2;TRI…	24	200
GO:0005886	plasma membrane	cellular_component	4	TRINITY_DN25889_c1_g1;TRINITY_DN23731_c0_g3;TRINITY_DN17046_c0_g1;TRINITY_DN18081_c0_g1;TRINITY_DN22626_c0_g2;TRINITY_DN18118_c0_g1;TRINITY_DN17495_c0_g1;TRINITY_DN23757_c0_g1;TRINITY_DN18401_c0_g2;TRINITY_DN25297_c1_g2;TRINITY_DN25182_c0_g1;TRINITY_DN17503_c0_g1;TRINITY_DN17114_c0_g1;TRINITY_DN26284_c0_g1;TRINITY_DN14865_c0_g1;TRINITY_DN19147_c0_g1;TRINITY_DN20559_c1_g2;TRINITY_DN21052_c0_g2;TRI…	19	200
GO:0005829	cytosol	cellular_component	6	TRINITY_DN24694_c1_g2;TRINITY_DN19093_c1_g3;TRINITY_DN17031_c0_g7;TRINITY_DN17495_c0_g1;TRINITY_DN20414_c0_g2;TRINITY_DN23757_c0_g1;TRINITY_DN20612_c0_g1;TRINITY_DN21409_c0_g2;TRINITY_DN23194_c0_g1;TRINITY_DN22017_c0_g1;TRINITY_DN21777_c0_g1;TRINITY_DN22701_c0_g3;TRINITY_DN17114_c0_g1;TRINITY_DN26260_c0_g2;TRINITY_DN25655_c1_g1;TRINITY_DN25292_c1_g2;TRINITY_DN24938_c0_g1	17	200
GO:0016021	integral component of membrane	cellular_component	5	TRINITY_DN17503_c0_g1;TRINITY_DN14865_c0_g1;TRINITY_DN23731_c0_g3;TRINITY_DN15435_c0_g3;TRINITY_DN26057_c1_g1;TRINITY_DN12599_c1_g1;TRINITY_DN19147_c0_g1;TRINITY_DN25297_c1_g2;TRINITY_DN17312_c0_g1;TRINITY_DN19359_c0_g1;TRINITY_DN18081_c0_g1;TRINITY_DN21052_c0_g2;TRINITY_DN14118_c0_g7;TRINITY_DN17015_c0_g2;TRINITY_DN25494_c2_g1;TRINITY_DN25764_c1_g4	16	200
GO:0046872	metal ion binding	molecular_function	6	TRINITY_DN24102_c0_g1;TRINITY_DN25150_c0_g3;TRINITY_DN19663_c0_g3;TRINITY_DN25889_c1_g1;TRINITY_DN22412_c0_g2;TRINITY_DN26117_c0_g1;TRINITY_DN23194_c0_g1;TRINITY_DN16038_c0_g3;TRINITY_DN23731_c0_g3;TRINITY_DN15141_c0_g3;TRINITY_DN25628_c0_g3;TRINITY_DN19463_c0_g1;TRINITY_DN19663_c0_g1	13	200
GO:0030154	cell differentiation	biological_process	5	TRINITY_DN24440_c0_g3;TRINITY_DN21186_c0_g1;TRINITY_DN16588_c0_g2;TRINITY_DN24164_c2_g1;TRINITY_DN24164_c2_g3;TRINITY_DN22709_c0_g1;TRINITY_DN22322_c0_g1;TRINITY_DN25328_c1_g1;TRINITY_DN24440_c0_g1;TRINITY_DN24164_c2_g2;TRINITY_DN16807_c0_g1;TRINITY_DN20294_c0_g3;TRINITY_DN15741_c0_g2	13	200
GO:0005524	ATP binding	molecular_function	5	TRINITY_DN25297_c1_g2;TRINITY_DN25907_c0_g1;TRINITY_DN22626_c0_g2;TRINITY_DN24714_c0_g1;TRINITY_DN21052_c0_g2;TRINITY_DN24694_c1_g2;TRINITY_DN25308_c0_g1;TRINITY_DN17046_c0_g1;TRINITY_DN20559_c1_g2;TRINITY_DN25889_c1_g1;TRINITY_DN19147_c0_g1;TRINITY_DN16662_c0_g5;TRINITY_DN18513_c1_g5	13	200
GO:0009507	chloroplast	cellular_component	7	TRINITY_DN25289_c0_g1;TRINITY_DN22716_c0_g1;TRINITY_DN25907_c0_g1;TRINITY_DN16298_c0_g1;TRINITY_DN17015_c0_g2;TRINITY_DN20610_c0_g4;TRINITY_DN15250_c0_g1;TRINITY_DN24811_c0_g1;TRINITY_DN19695_c0_g2;TRINITY_DN15435_c0_g3;TRINITY_DN23135_c0_g1	11	200
GO:0043565	sequence-specific DNA binding	molecular_function	7	TRINITY_DN24102_c0_g1;TRINITY_DN25328_c1_g1;TRINITY_DN16207_c2_g1;TRINITY_DN25356_c0_g1;TRINITY_DN16207_c1_g2;TRINITY_DN26094_c0_g1;TRINITY_DN24440_c0_g1;TRINITY_DN24440_c0_g3;TRINITY_DN16215_c0_g1	9	200
GO:0006952	defense response	biological_process	5	TRINITY_DN25764_c1_g4;TRINITY_DN21409_c0_g2;TRINITY_DN26397_c1_g4;TRINITY_DN14118_c0_g7;TRINITY_DN18118_c0_g1;TRINITY_DN25494_c2_g1;TRINITY_DN26284_c0_g1;TRINITY_DN25767_c0_g2;TRINITY_DN16662_c0_g5	9	200
GO:0044212	transcription regulatory region DNA binding	molecular_function	7	TRINITY_DN17108_c3_g1;TRINITY_DN24440_c0_g3;TRINITY_DN25328_c1_g1;TRINITY_DN22936_c0_g4;TRINITY_DN16207_c1_g2;TRINITY_DN24102_c0_g1;TRINITY_DN24440_c0_g1;TRINITY_DN16207_c2_g1	8	200
GO:0007165	signal transduction	biological_process	4	TRINITY_DN26397_c1_g4;TRINITY_DN14118_c0_g7;TRINITY_DN25764_c1_g4;TRINITY_DN25308_c0_g1;TRINITY_DN25767_c0_g2;TRINITY_DN22701_c0_g3;TRINITY_DN25494_c2_g1;TRINITY_DN25150_c0_g3	8	200
GO:0042742	defense response to bacterium	biological_process	8	TRINITY_DN19663_c0_g3;TRINITY_DN22017_c0_g1;TRINITY_DN20517_c0_g2;TRINITY_DN21012_c0_g1;TRINITY_DN24811_c0_g1;TRINITY_DN12590_c0_g1;TRINITY_DN19663_c0_g1	7	200
GO:0046916	cellular transition metal ion homeostasis	biological_process	11	TRINITY_DN21120_c0_g1;TRINITY_DN13312_c0_g3;TRINITY_DN13312_c0_g1;TRINITY_DN13312_c0_g5;TRINITY_DN22632_c1_g1;TRINITY_DN13783_c0_g6	6	200
GO:0046914	transition metal ion binding	molecular_function	7	TRINITY_DN13312_c0_g3;TRINITY_DN13312_c0_g5;TRINITY_DN21120_c0_g1;TRINITY_DN13783_c0_g6;TRINITY_DN22632_c1_g1;TRINITY_DN13312_c0_g1	6	200
GO:0043531	ADP binding	molecular_function	9	TRINITY_DN25767_c0_g2;TRINITY_DN25764_c1_g4;TRINITY_DN26397_c1_g4;TRINITY_DN14118_c0_g7;TRINITY_DN25494_c2_g1;TRINITY_DN16662_c0_g5	6	200
GO:0042803	protein homodimerization activity	molecular_function	6	TRINITY_DN25292_c1_g2;TRINITY_DN23757_c0_g1;TRINITY_DN16038_c0_g3;TRINITY_DN25655_c1_g1;TRINITY_DN26009_c2_g2;TRINITY_DN22893_c0_g1	6	200
GO:0030001	metal ion transport	biological_process	8	TRINITY_DN22632_c1_g1;TRINITY_DN21120_c0_g1;TRINITY_DN13312_c0_g5;TRINITY_DN13783_c0_g6;TRINITY_DN13312_c0_g1;TRINITY_DN13312_c0_g3	6	200
GO:0010073	meristem maintenance	biological_process	4	TRINITY_DN24164_c2_g2;TRINITY_DN20294_c0_g3;TRINITY_DN16588_c0_g2;TRINITY_DN24164_c2_g1;TRINITY_DN22322_c0_g1;TRINITY_DN22709_c0_g1	6	200
GO:0009965	leaf morphogenesis	biological_process	6	TRINITY_DN15741_c0_g2;TRINITY_DN20610_c0_g4;TRINITY_DN24164_c2_g2;TRINITY_DN25655_c1_g1;TRINITY_DN24164_c2_g1;TRINITY_DN16807_c0_g1	6	200
GO:0009506	plasmodesma	cellular_component	5	TRINITY_DN17503_c0_g1;TRINITY_DN23262_c0_g1;TRINITY_DN19147_c0_g1;TRINITY_DN18513_c1_g5;TRINITY_DN26284_c0_g1;TRINITY_DN18118_c0_g1	6	200
GO:0008289	lipid binding	molecular_function	4	TRINITY_DN24164_c2_g1;TRINITY_DN24164_c2_g2;TRINITY_DN24440_c0_g1;TRINITY_DN24440_c0_g3;TRINITY_DN24164_c2_g3;TRINITY_DN21052_c0_g2	6	200
GO:0006468	protein phosphorylation	biological_process	9	TRINITY_DN25889_c1_g1;TRINITY_DN21843_c0_g2;TRINITY_DN26284_c0_g1;TRINITY_DN21386_c1_g2;TRINITY_DN21052_c0_g2;TRINITY_DN18118_c0_g1	6	200
GO:0005622	intracellular	cellular_component	4	TRINITY_DN17046_c0_g1;TRINITY_DN22412_c0_g2;TRINITY_DN14304_c1_g2;TRINITY_DN20559_c1_g2;TRINITY_DN24365_c0_g1;TRINITY_DN22951_c0_g2	6	200
GO:0005576	extracellular region	cellular_component	3	TRINITY_DN25293_c1_g2;TRINITY_DN21125_c0_g1;TRINITY_DN22216_c0_g1;TRINITY_DN16662_c0_g5;TRINITY_DN21409_c0_g2;TRINITY_DN26117_c0_g1	6	200
GO:0004674	protein serine/threonine kinase activity	molecular_function	8	TRINITY_DN21386_c1_g2;TRINITY_DN20559_c1_g2;TRINITY_DN25889_c1_g1;TRINITY_DN17046_c0_g1;TRINITY_DN18118_c0_g1;TRINITY_DN26284_c0_g1	6	200
GO:0003755	peptidyl-prolyl cis-trans isomerase activity	molecular_function	6	TRINITY_DN15434_c0_g2;TRINITY_DN17047_c1_g1;TRINITY_DN23001_c0_g2;TRINITY_DN21348_c0_g1;TRINITY_DN18817_c0_g1;TRINITY_DN21420_c0_g1	6	200
GO:0048653	anther development	biological_process	5	TRINITY_DN22590_c0_g2;TRINITY_DN16207_c2_g1;TRINITY_DN19663_c0_g7;TRINITY_DN16207_c1_g2;TRINITY_DN24102_c0_g1	5	200
GO:0016301	kinase activity	molecular_function	6	TRINITY_DN22626_c0_g2;TRINITY_DN21843_c0_g2;TRINITY_DN21052_c0_g2;TRINITY_DN17046_c0_g1;TRINITY_DN20559_c1_g2	5	200
GO:0010014	meristem initiation	biological_process	4	TRINITY_DN24440_c0_g3;TRINITY_DN24164_c2_g1;TRINITY_DN24164_c2_g2;TRINITY_DN24164_c2_g3;TRINITY_DN24440_c0_g1	5	200
GO:0009908	flower development	biological_process	6	TRINITY_DN20294_c0_g3;TRINITY_DN16588_c0_g2;TRINITY_DN22322_c0_g1;TRINITY_DN21186_c0_g1;TRINITY_DN22709_c0_g1	5	200
GO:0009855	determination of bilateral symmetry	biological_process	6	TRINITY_DN24164_c2_g2;TRINITY_DN24440_c0_g1;TRINITY_DN24440_c0_g3;TRINITY_DN24164_c2_g3;TRINITY_DN24164_c2_g1	5	200
GO:0009734	auxin-activated signaling pathway	biological_process	6	TRINITY_DN21834_c0_g2;TRINITY_DN19308_c1_g2;TRINITY_DN21628_c1_g1;TRINITY_DN13674_c0_g1;TRINITY_DN22028_c1_g1	5	200
GO:0009414	response to water deprivation	biological_process	5	TRINITY_DN21409_c0_g2;TRINITY_DN25297_c1_g2;TRINITY_DN20517_c0_g2;TRINITY_DN23757_c0_g1;TRINITY_DN20559_c1_g2	5	200
GO:0005783	endoplasmic reticulum	cellular_component	6	TRINITY_DN19415_c0_g1;TRINITY_DN21409_c0_g2;TRINITY_DN25297_c1_g2;TRINITY_DN24714_c0_g1;TRINITY_DN20559_c1_g2	5	200
GO:0005739	mitochondrion	cellular_component	6	TRINITY_DN22115_c0_g1;TRINITY_DN20134_c0_g2;TRINITY_DN25297_c1_g2;TRINITY_DN20517_c0_g2;TRINITY_DN20292_c0_g2	5	200
GO:0003676	nucleic acid binding	molecular_function	5	TRINITY_DN22115_c0_g1;TRINITY_DN22138_c0_g2;TRINITY_DN20612_c0_g1;TRINITY_DN19463_c0_g1;TRINITY_DN16038_c0_g3	5	200
GO:0061630	ubiquitin protein ligase activity	molecular_function	7	TRINITY_DN25150_c0_g3;TRINITY_DN13919_c0_g5;TRINITY_DN23033_c0_g1;TRINITY_DN16250_c0_g1	4	200
GO:0048481	plant ovule development	biological_process	5	TRINITY_DN22322_c0_g1;TRINITY_DN20294_c0_g3;TRINITY_DN16588_c0_g2;TRINITY_DN22709_c0_g1	4	200
GO:0048316	seed development	biological_process	5	TRINITY_DN22709_c0_g1;TRINITY_DN20294_c0_g3;TRINITY_DN22322_c0_g1;TRINITY_DN16588_c0_g2	4	200
GO:0043231	intracellular membrane-bounded organelle	cellular_component	5	TRINITY_DN22294_c0_g1;TRINITY_DN21588_c0_g2;TRINITY_DN21819_c0_g3;TRINITY_DN16922_c0_g1	4	200
GO:0019953	sexual reproduction	biological_process	4	TRINITY_DN16588_c0_g2;TRINITY_DN22322_c0_g1;TRINITY_DN20294_c0_g3;TRINITY_DN22709_c0_g1	4	200
GO:0016020	membrane	cellular_component	3	TRINITY_DN16980_c1_g3;TRINITY_DN26057_c1_g1;TRINITY_DN13124_c0_g5;TRINITY_DN17503_c0_g1	4	200
GO:0010468	regulation of gene expression	biological_process	7	TRINITY_DN25308_c0_g1;TRINITY_DN19663_c0_g1;TRINITY_DN19663_c0_g3;TRINITY_DN25994_c1_g2	4	200
GO:0010093	specification of floral organ identity	biological_process	5	TRINITY_DN16588_c0_g2;TRINITY_DN22709_c0_g1;TRINITY_DN20294_c0_g3;TRINITY_DN22322_c0_g1	4	200
GO:0009651	response to salt stress	biological_process	6	TRINITY_DN20559_c1_g2;TRINITY_DN25297_c1_g2;TRINITY_DN23345_c0_g1;TRINITY_DN23757_c0_g1	4	200
GO:0008270	zinc ion binding	molecular_function	8	TRINITY_DN16038_c0_g3;TRINITY_DN23757_c0_g1;TRINITY_DN17385_c0_g2;TRINITY_DN18513_c1_g5	4	200
GO:0007275	multicellular organism development	biological_process	4	TRINITY_DN20559_c1_g2;TRINITY_DN23959_c0_g5;TRINITY_DN13674_c0_g1;TRINITY_DN23959_c0_g2	4	200
GO:0006334	nucleosome assembly	biological_process	7	TRINITY_DN22108_c0_g1;TRINITY_DN13646_c0_g2;TRINITY_DN20933_c1_g1;TRINITY_DN18132_c0_g1	4	200
GO:0005618	cell wall	cellular_component	5	TRINITY_DN11605_c0_g1;TRINITY_DN22216_c0_g1;TRINITY_DN21125_c0_g1;TRINITY_DN24694_c1_g2	4	200
GO:0080060	integument development	biological_process	5	TRINITY_DN24164_c2_g2;TRINITY_DN24164_c2_g1;TRINITY_DN24164_c2_g3	3	200
GO:0080044	quercetin 7-O-glucosyltransferase activity	molecular_function	8	TRINITY_DN21819_c0_g3;TRINITY_DN21588_c0_g2;TRINITY_DN22294_c0_g1	3	200
GO:0080043	quercetin 3-O-glucosyltransferase activity	molecular_function	8	TRINITY_DN21588_c0_g2;TRINITY_DN22294_c0_g1;TRINITY_DN21819_c0_g3	3	200
GO:0061077	chaperone-mediated protein folding	biological_process	5	TRINITY_DN15434_c0_g2;TRINITY_DN21420_c0_g1;TRINITY_DN21348_c0_g1	3	200
GO:0055114	oxidation-reduction process	biological_process	4	TRINITY_DN17495_c0_g1;TRINITY_DN20517_c0_g2;TRINITY_DN23757_c0_g1	3	200
GO:0052696	flavonoid glucuronidation	biological_process	6	TRINITY_DN21588_c0_g2;TRINITY_DN21819_c0_g3;TRINITY_DN22294_c0_g1	3	200
GO:0051301	cell division	biological_process	4	TRINITY_DN21834_c0_g2;TRINITY_DN19308_c1_g2;TRINITY_DN25356_c0_g1	3	200
GO:0048366	leaf development	biological_process	7	TRINITY_DN19308_c1_g2;TRINITY_DN15741_c0_g2;TRINITY_DN16807_c0_g1	3	200
GO:0048046	apoplast	cellular_component	4	TRINITY_DN21125_c0_g1;TRINITY_DN19147_c0_g1;TRINITY_DN24811_c0_g1	3	200
GO:0046983	protein dimerization activity	molecular_function	5	TRINITY_DN14117_c0_g2;TRINITY_DN25283_c0_g4;TRINITY_DN25283_c0_g5	3	200
GO:0046658	anchored component of plasma membrane	cellular_component	6	TRINITY_DN24694_c1_g2;TRINITY_DN16941_c0_g5;TRINITY_DN14166_c0_g2	3	200
GO:0045893	positive regulation of transcription, DNA-templated	biological_process	9	TRINITY_DN16207_c1_g2;TRINITY_DN16207_c2_g1;TRINITY_DN25628_c0_g3	3	200
GO:0035556	intracellular signal transduction	biological_process	5	TRINITY_DN20559_c1_g2;TRINITY_DN21386_c1_g2;TRINITY_DN17046_c0_g1	3	200
GO:0016757	transferase activity, transferring glycosyl groups	molecular_function	5	TRINITY_DN19093_c1_g3;TRINITY_DN19359_c0_g1;TRINITY_DN23731_c0_g3	3	200
GO:0016740	transferase activity	molecular_function	4	TRINITY_DN17164_c1_g2;TRINITY_DN19359_c0_g1;TRINITY_DN21506_c0_g1	3	200
GO:0010228	vegetative to reproductive phase transition of meristem	biological_process	5	TRINITY_DN24938_c0_g1;TRINITY_DN21186_c0_g1;TRINITY_DN23708_c0_g1	3	200
GO:0010075	regulation of meristem growth	biological_process	7	TRINITY_DN24164_c2_g1;TRINITY_DN24164_c2_g2;TRINITY_DN16038_c0_g3	3	200
GO:0010072	primary shoot apical meristem specification	biological_process	5	TRINITY_DN24164_c2_g3;TRINITY_DN13674_c0_g1;TRINITY_DN25655_c1_g1	3	200
GO:0009944	polarity specification of adaxial/abaxial axis	biological_process	6	TRINITY_DN24440_c0_g1;TRINITY_DN24440_c0_g3;TRINITY_DN24164_c2_g3	3	200
GO:0009813	flavonoid biosynthetic process	biological_process	6	TRINITY_DN21588_c0_g2;TRINITY_DN21819_c0_g3;TRINITY_DN22294_c0_g1	3	200
GO:0009751	response to salicylic acid	biological_process	6	TRINITY_DN25328_c1_g1;TRINITY_DN16207_c2_g1;TRINITY_DN16207_c1_g2	3	200
GO:0009738	abscisic acid-activated signaling pathway	biological_process	6	TRINITY_DN23345_c0_g1;TRINITY_DN20860_c0_g1;TRINITY_DN19308_c1_g2	3	200
GO:0009737	response to abscisic acid	biological_process	6	TRINITY_DN23345_c0_g1;TRINITY_DN23757_c0_g1;TRINITY_DN25297_c1_g2	3	200
GO:0009535	chloroplast thylakoid membrane	cellular_component	8	TRINITY_DN24811_c0_g1;TRINITY_DN25907_c0_g1;TRINITY_DN23135_c0_g1	3	200
GO:0009409	response to cold	biological_process	5	TRINITY_DN21409_c0_g2;TRINITY_DN25297_c1_g2;TRINITY_DN23757_c0_g1	3	200
GO:0006508	proteolysis	biological_process	7	TRINITY_DN15984_c0_g1;TRINITY_DN22355_c0_g2;TRINITY_DN26158_c1_g2	3	200
GO:0006357	regulation of transcription by RNA polymerase II	biological_process	9	TRINITY_DN16207_c2_g1;TRINITY_DN25328_c1_g1;TRINITY_DN16207_c1_g2	3	200
GO:0005794	Golgi apparatus	cellular_component	6	TRINITY_DN19359_c0_g1;TRINITY_DN23731_c0_g3;TRINITY_DN23757_c0_g1	3	200
GO:0005789	endoplasmic reticulum membrane	cellular_component	5	TRINITY_DN15434_c0_g2;TRINITY_DN21348_c0_g1;TRINITY_DN21420_c0_g1	3	200
GO:0005773	vacuole	cellular_component	6	TRINITY_DN22714_c0_g4;TRINITY_DN25860_c0_g1;TRINITY_DN19147_c0_g1	3	200
GO:0005528	FK506 binding	molecular_function	6	TRINITY_DN21420_c0_g1;TRINITY_DN21348_c0_g1;TRINITY_DN15434_c0_g2	3	200
GO:0004842	ubiquitin-protein transferase activity	molecular_function	6	TRINITY_DN23711_c0_g2;TRINITY_DN25233_c0_g8;TRINITY_DN21141_c0_g4	3	200
GO:0003729	mRNA binding	molecular_function	7	TRINITY_DN25655_c1_g1;TRINITY_DN22017_c0_g1;TRINITY_DN21492_c0_g1	3	200
GO:0003723	RNA binding	molecular_function	6	TRINITY_DN23614_c0_g1;TRINITY_DN19212_c1_g2;TRINITY_DN18240_c0_g1	3	200
GO:0001135	RNA polymerase II transcription regulator recruiting activity	molecular_function	7	TRINITY_DN25328_c1_g1;TRINITY_DN16207_c1_g2;TRINITY_DN16207_c2_g1	3	200
GO:0000981	DNA-binding transcription factor activity, RNA polymerase II-specific	molecular_function	5	TRINITY_DN16207_c2_g1;TRINITY_DN16207_c1_g2;TRINITY_DN25328_c1_g1	3	200
GO:0000398	mRNA splicing, via spliceosome	biological_process	13	TRINITY_DN23614_c0_g1;TRINITY_DN18240_c0_g1;TRINITY_DN25994_c1_g2	3	200
GO:0000166	nucleotide binding	molecular_function	5	TRINITY_DN25655_c1_g1;TRINITY_DN23757_c0_g1;TRINITY_DN16980_c1_g3	3	200
GO:1990019	protein storage vacuole organization	biological_process	7	TRINITY_DN16207_c2_g1;TRINITY_DN16207_c1_g2	2	200
GO:1905392	plant organ morphogenesis	biological_process	5	TRINITY_DN24164_c2_g2;TRINITY_DN24164_c2_g1	2	200
GO:0071004	U2-type prespliceosome	cellular_component	8	TRINITY_DN23614_c0_g1;TRINITY_DN18240_c0_g1	2	200
GO:0070179	D-serine biosynthetic process	biological_process	12	TRINITY_DN20648_c0_g3;TRINITY_DN20648_c0_g1	2	200
GO:0055085	transmembrane transport	biological_process	6	TRINITY_DN19147_c0_g1;TRINITY_DN17503_c0_g1	2	200
GO:0051603	proteolysis involved in cellular protein catabolic process	biological_process	8	TRINITY_DN12598_c0_g1;TRINITY_DN22714_c0_g4	2	200
GO:0050832	defense response to fungus	biological_process	8	TRINITY_DN21012_c0_g1;TRINITY_DN17046_c0_g1	2	200
GO:0048829	root cap development	biological_process	5	TRINITY_DN21834_c0_g2;TRINITY_DN19308_c1_g2	2	200
GO:0048655	anther wall tapetum morphogenesis	biological_process	5	TRINITY_DN16207_c1_g2;TRINITY_DN16207_c2_g1	2	200
GO:0048527	lateral root development	biological_process	8	TRINITY_DN13674_c0_g1;TRINITY_DN22936_c0_g4	2	200
GO:0048510	regulation of timing of transition from vegetative to reproductive phase	biological_process	8	TRINITY_DN25628_c0_g3;TRINITY_DN24102_c0_g1	2	200
GO:0048263	determination of dorsal identity	biological_process	7	TRINITY_DN24164_c2_g1;TRINITY_DN24164_c2_g2	2	200
GO:0048235	pollen sperm cell differentiation	biological_process	5	TRINITY_DN16207_c1_g2;TRINITY_DN16207_c2_g1	2	200
GO:0045962	positive regulation of development, heterochronic	biological_process	7	TRINITY_DN15741_c0_g2;TRINITY_DN16807_c0_g1	2	200
GO:0045926	negative regulation of growth	biological_process	6	TRINITY_DN16207_c1_g2;TRINITY_DN16207_c2_g1	2	200
GO:0045454	cell redox homeostasis	biological_process	5	TRINITY_DN17495_c0_g1;TRINITY_DN23345_c0_g1	2	200
GO:0043621	protein self-association	molecular_function	5	TRINITY_DN22893_c0_g1;TRINITY_DN26009_c2_g2	2	200
GO:0043161	proteasome-mediated ubiquitin-dependent protein catabolic process	biological_process	11	TRINITY_DN17031_c0_g7;TRINITY_DN23033_c0_g1	2	200
GO:0043068	positive regulation of programmed cell death	biological_process	8	TRINITY_DN16207_c1_g2;TRINITY_DN16207_c2_g1	2	200
GO:0042626	ATPase-coupled transmembrane transporter activity	molecular_function	8	TRINITY_DN18081_c0_g1;TRINITY_DN19147_c0_g1	2	200
GO:0035198	miRNA binding	molecular_function	8	TRINITY_DN19308_c1_g2;TRINITY_DN21834_c0_g2	2	200
GO:0034399	nuclear periphery	cellular_component	6	TRINITY_DN25289_c0_g1;TRINITY_DN26260_c0_g2	2	200
GO:0031625	ubiquitin protein ligase binding	molecular_function	7	TRINITY_DN13919_c0_g5;TRINITY_DN16250_c0_g1	2	200
GO:0031146	SCF-dependent proteasomal ubiquitin-dependent protein catabolic process	biological_process	12	TRINITY_DN21141_c0_g4;TRINITY_DN25233_c0_g8	2	200
GO:0030378	serine racemase activity	molecular_function	9	TRINITY_DN20648_c0_g1;TRINITY_DN20648_c0_g3	2	200
GO:0030170	pyridoxal phosphate binding	molecular_function	6	TRINITY_DN20648_c0_g1;TRINITY_DN20648_c0_g3	2	200
GO:0030163	protein catabolic process	biological_process	7	TRINITY_DN22355_c0_g2;TRINITY_DN26158_c1_g2	2	200
GO:0019898	extrinsic component of membrane	cellular_component	4	TRINITY_DN24811_c0_g1;TRINITY_DN22951_c0_g2	2	200
GO:0019005	SCF ubiquitin ligase complex	cellular_component	7	TRINITY_DN21141_c0_g4;TRINITY_DN25233_c0_g8	2	200
GO:0018107	peptidyl-threonine phosphorylation	biological_process	10	TRINITY_DN20559_c1_g2;TRINITY_DN17046_c0_g1	2	200
GO:0018105	peptidyl-serine phosphorylation	biological_process	10	TRINITY_DN17046_c0_g1;TRINITY_DN20559_c1_g2	2	200
GO:0016887	ATPase activity	molecular_function	9	TRINITY_DN25297_c1_g2;TRINITY_DN25907_c0_g1	2	200
GO:0010501	RNA secondary structure unwinding	biological_process	9	TRINITY_DN25994_c1_g2;TRINITY_DN21150_c0_g2	2	200
GO:0010208	pollen wall assembly	biological_process	7	TRINITY_DN17015_c0_g2;TRINITY_DN22028_c1_g1	2	200
GO:0010154	fruit development	biological_process	6	TRINITY_DN25297_c1_g2;TRINITY_DN19308_c1_g2	2	200
GO:0010089	xylem development	biological_process	7	TRINITY_DN24440_c0_g1;TRINITY_DN24440_c0_g3	2	200
GO:0010088	phloem development	biological_process	7	TRINITY_DN22893_c0_g1;TRINITY_DN26009_c2_g2	2	200
GO:0010087	phloem or xylem histogenesis	biological_process	6	TRINITY_DN24164_c2_g2;TRINITY_DN24164_c2_g1	2	200
GO:0010051	xylem and phloem pattern formation	biological_process	6	TRINITY_DN24440_c0_g1;TRINITY_DN24440_c0_g3	2	200
GO:0009956	radial pattern formation	biological_process	6	TRINITY_DN24440_c0_g1;TRINITY_DN24440_c0_g3	2	200
GO:0009941	chloroplast envelope	cellular_component	7	TRINITY_DN17015_c0_g2;TRINITY_DN24811_c0_g1	2	200
GO:0009742	brassinosteroid mediated signaling pathway	biological_process	7	TRINITY_DN21052_c0_g2;TRINITY_DN22714_c0_g4	2	200
GO:0009740	gibberellic acid mediated signaling pathway	biological_process	7	TRINITY_DN16207_c1_g2;TRINITY_DN16207_c2_g1	2	200
GO:0009739	response to gibberellin	biological_process	6	TRINITY_DN21884_c0_g2;TRINITY_DN21884_c0_g1	2	200
GO:0009733	response to auxin	biological_process	6	TRINITY_DN16807_c0_g1;TRINITY_DN21834_c0_g2	2	200
GO:0009723	response to ethylene	biological_process	6	TRINITY_DN16207_c1_g2;TRINITY_DN16207_c2_g1	2	200
GO:0009570	chloroplast stroma	cellular_component	8	TRINITY_DN24621_c0_g1;TRINITY_DN24811_c0_g1	2	200
GO:0009534	chloroplast thylakoid	cellular_component	7	TRINITY_DN23135_c0_g1;TRINITY_DN24811_c0_g1	2	200
GO:0008721	D-serine ammonia-lyase activity	molecular_function	7	TRINITY_DN20648_c0_g3;TRINITY_DN20648_c0_g1	2	200
GO:0008285	negative regulation of cell population proliferation	biological_process	7	TRINITY_DN16207_c2_g1;TRINITY_DN16207_c1_g2	2	200
GO:0007389	pattern specification process	biological_process	4	TRINITY_DN21834_c0_g2;TRINITY_DN19308_c1_g2	2	200
GO:0006997	nucleus organization	biological_process	6	TRINITY_DN25289_c0_g1;TRINITY_DN26260_c0_g2	2	200
GO:0006979	response to oxidative stress	biological_process	5	TRINITY_DN20517_c0_g2;TRINITY_DN21409_c0_g2	2	200
GO:0006970	response to osmotic stress	biological_process	5	TRINITY_DN23345_c0_g1;TRINITY_DN23757_c0_g1	2	200
GO:0006563	L-serine metabolic process	biological_process	11	TRINITY_DN20648_c0_g3;TRINITY_DN20648_c0_g1	2	200
GO:0006402	mRNA catabolic process	biological_process	10	TRINITY_DN20130_c0_g4;TRINITY_DN25655_c1_g1	2	200
GO:0006397	mRNA processing	biological_process	10	TRINITY_DN22138_c0_g2;TRINITY_DN25655_c1_g1	2	200
GO:0006281	DNA repair	biological_process	8	TRINITY_DN14304_c1_g2;TRINITY_DN24938_c0_g1	2	200
GO:0005774	vacuolar membrane	cellular_component	7	TRINITY_DN25860_c0_g1;TRINITY_DN19147_c0_g1	2	200
GO:0005768	endosome	cellular_component	7	TRINITY_DN16980_c1_g3;TRINITY_DN19359_c0_g1	2	200
GO:0005730	nucleolus	cellular_component	6	TRINITY_DN24938_c0_g1;TRINITY_DN23262_c0_g1	2	200
GO:0005685	U1 snRNP	cellular_component	8	TRINITY_DN23614_c0_g1;TRINITY_DN18240_c0_g1	2	200
GO:0005652	nuclear lamina	cellular_component	6	TRINITY_DN25289_c0_g1;TRINITY_DN26260_c0_g2	2	200
GO:0005516	calmodulin binding	molecular_function	5	TRINITY_DN18401_c0_g2;TRINITY_DN25907_c0_g1	2	200
GO:0004722	protein serine/threonine phosphatase activity	molecular_function	9	TRINITY_DN25889_c1_g1;TRINITY_DN26117_c0_g1	2	200
GO:0004190	aspartic-type endopeptidase activity	molecular_function	8	TRINITY_DN26158_c1_g2;TRINITY_DN22355_c0_g2	2	200
GO:0004004	ATP-dependent RNA helicase activity	molecular_function	11	TRINITY_DN25994_c1_g2;TRINITY_DN21150_c0_g2	2	200
GO:0003941	L-serine ammonia-lyase activity	molecular_function	7	TRINITY_DN20648_c0_g1;TRINITY_DN20648_c0_g3	2	200
GO:0003924	GTPase activity	molecular_function	9	TRINITY_DN24365_c0_g1;TRINITY_DN23194_c0_g1	2	200
GO:0003735	structural constituent of ribosome	molecular_function	4	TRINITY_DN18599_c0_g1;TRINITY_DN18027_c0_g3	2	200
GO:0000932	P-body	cellular_component	8	TRINITY_DN25655_c1_g1;TRINITY_DN20130_c0_g4	2	200
GO:0000788	nuclear nucleosome	cellular_component	6	TRINITY_DN22108_c0_g1;TRINITY_DN13646_c0_g2	2	200
GO:0000103	sulfate assimilation	biological_process	6	TRINITY_DN17495_c0_g1;TRINITY_DN15703_c0_g1	2	200
GO:2000306	positive regulation of photomorphogenesis	biological_process	9	TRINITY_DN15741_c0_g2	1	200
GO:2000117	negative regulation of cysteine-type endopeptidase activity	biological_process	12	TRINITY_DN21409_c0_g2	1	200
GO:1903508	positive regulation of nucleic acid-templated transcription	biological_process	10	TRINITY_DN15741_c0_g2	1	200
GO:1902001	fatty acid transmembrane transport	biological_process	9	TRINITY_DN17015_c0_g2	1	200
GO:1901349	glucosinolate transport	biological_process	9	TRINITY_DN17503_c0_g1	1	200
GO:1900091	regulation of raffinose biosynthetic process	biological_process	9	TRINITY_DN16980_c1_g3	1	200
GO:1900088	regulation of inositol biosynthetic process	biological_process	9	TRINITY_DN16980_c1_g3	1	200
GO:1900039	positive regulation of cellular response to hypoxia	biological_process	7	TRINITY_DN23757_c0_g1	1	200
GO:0102391	decanoate-CoA ligase activity	molecular_function	9	TRINITY_DN24714_c0_g1	1	200
GO:0097298	regulation of nucleus size	biological_process	6	TRINITY_DN25289_c0_g1	1	200
GO:0090502	RNA phosphodiester bond hydrolysis, endonucleolytic	biological_process	10	TRINITY_DN24027_c0_g1	1	200
GO:0090449	phloem glucosinolate loading	biological_process	9	TRINITY_DN17503_c0_g1	1	200
GO:0090448	glucosinolate:proton symporter activity	molecular_function	8	TRINITY_DN17503_c0_g1	1	200
GO:0090332	stomatal closure	biological_process	5	TRINITY_DN12590_c0_g1	1	200
GO:0080167	response to karrikin	biological_process	5	TRINITY_DN17503_c0_g1	1	200
GO:0080163	regulation of protein serine/threonine phosphatase activity	biological_process	12	TRINITY_DN20860_c0_g1	1	200
GO:0080008	Cul4-RING E3 ubiquitin ligase complex	cellular_component	7	TRINITY_DN16980_c1_g3	1	200
GO:0071949	FAD binding	molecular_function	7	TRINITY_DN20517_c0_g2	1	200
GO:0071668	plant-type cell wall assembly	biological_process	8	TRINITY_DN17015_c0_g2	1	200
GO:0071555	cell wall organization	biological_process	6	TRINITY_DN23731_c0_g3	1	200
GO:0071482	cellular response to light stimulus	biological_process	7	TRINITY_DN20610_c0_g4	1	200
GO:0071365	cellular response to auxin stimulus	biological_process	7	TRINITY_DN25655_c1_g1	1	200
GO:0070847	core mediator complex	cellular_component	7	TRINITY_DN21051_c0_g4	1	200
GO:0070413	trehalose metabolism in response to stress	biological_process	9	TRINITY_DN19093_c1_g3	1	200
GO:0070403	NAD+ binding	molecular_function	6	TRINITY_DN17114_c0_g1	1	200
GO:0061088	regulation of sequestering of zinc ion	biological_process	6	TRINITY_DN13124_c0_g5	1	200
GO:0061025	membrane fusion	biological_process	6	TRINITY_DN17031_c0_g7	1	200
GO:0060776	simple leaf morphogenesis	biological_process	7	TRINITY_DN21141_c0_g4	1	200
GO:0060261	positive regulation of transcription initiation from RNA polymerase II promoter	biological_process	11	TRINITY_DN22642_c0_g4	1	200
GO:0055088	lipid homeostasis	biological_process	7	TRINITY_DN17015_c0_g2	1	200
GO:0052543	callose deposition in cell wall	biological_process	9	TRINITY_DN22028_c1_g1	1	200
GO:0051607	defense response to virus	biological_process	5	TRINITY_DN22017_c0_g1	1	200
GO:0051539	4 iron, 4 sulfur cluster binding	molecular_function	6	TRINITY_DN19415_c0_g1	1	200
GO:0051302	regulation of cell division	biological_process	6	TRINITY_DN16038_c0_g3	1	200
GO:0051213	dioxygenase activity	molecular_function	5	TRINITY_DN18769_c0_g4	1	200
GO:0051087	chaperone binding	molecular_function	5	TRINITY_DN22199_c1_g1	1	200
GO:0050897	cobalt ion binding	molecular_function	8	TRINITY_DN21409_c0_g2	1	200
GO:0048830	adventitious root development	biological_process	7	TRINITY_DN22028_c1_g1	1	200
GO:0048768	root hair cell tip growth	biological_process	8	TRINITY_DN25356_c0_g1	1	200
GO:0048589	developmental growth	biological_process	4	TRINITY_DN19308_c1_g2	1	200
GO:0048571	long-day photoperiodism	biological_process	8	TRINITY_DN16980_c1_g3	1	200
GO:0048442	sepal development	biological_process	6	TRINITY_DN19308_c1_g2	1	200
GO:0048441	petal development	biological_process	6	TRINITY_DN19308_c1_g2	1	200
GO:0048364	root development	biological_process	6	TRINITY_DN16038_c0_g3	1	200
GO:0048278	vesicle docking	biological_process	6	TRINITY_DN12599_c1_g1	1	200
GO:0048040	UDP-glucuronate decarboxylase activity	molecular_function	7	TRINITY_DN17114_c0_g1	1	200
GO:0046686	response to cadmium ion	biological_process	7	TRINITY_DN23757_c0_g1	1	200
GO:0046653	tetrahydrofolate metabolic process	biological_process	7	TRINITY_DN20292_c0_g2	1	200
GO:0046564	oxalate decarboxylase activity	molecular_function	7	TRINITY_DN11605_c0_g1	1	200
GO:0045944	positive regulation of transcription by RNA polymerase II	biological_process	10	TRINITY_DN26094_c0_g1	1	200
GO:0045604	regulation of epidermal cell differentiation	biological_process	8	TRINITY_DN16038_c0_g3	1	200
GO:0045333	cellular respiration	biological_process	7	TRINITY_DN23757_c0_g1	1	200
GO:0045053	protein retention in Golgi apparatus	biological_process	7	TRINITY_DN22951_c0_g2	1	200
GO:0044391	ribosomal subunit	cellular_component	6	TRINITY_DN19487_c0_g1	1	200
GO:0043968	histone H2A acetylation	biological_process	11	TRINITY_DN17628_c0_g1	1	200
GO:0043967	histone H4 acetylation	biological_process	11	TRINITY_DN17628_c0_g1	1	200
GO:0043620	regulation of DNA-templated transcription in response to stress	biological_process	9	TRINITY_DN22936_c0_g4	1	200
GO:0043130	ubiquitin binding	molecular_function	6	TRINITY_DN17031_c0_g7	1	200
GO:0042732	D-xylose metabolic process	biological_process	8	TRINITY_DN17114_c0_g1	1	200
GO:0042542	response to hydrogen peroxide	biological_process	7	TRINITY_DN23757_c0_g1	1	200
GO:0042538	hyperosmotic salinity response	biological_process	7	TRINITY_DN20559_c1_g2	1	200
GO:0042393	histone binding	molecular_function	5	TRINITY_DN24938_c0_g1	1	200
GO:0035598	N6-threonylcarbomyladenosine methylthiotransferase activity	molecular_function	8	TRINITY_DN19415_c0_g1	1	200
GO:0035267	NuA4 histone acetyltransferase complex	cellular_component	9	TRINITY_DN17628_c0_g1	1	200
GO:0035197	siRNA binding	molecular_function	8	TRINITY_DN22017_c0_g1	1	200
GO:0035101	FACT complex	cellular_component	5	TRINITY_DN24938_c0_g1	1	200
GO:0035091	phosphatidylinositol binding	molecular_function	6	TRINITY_DN25150_c0_g3	1	200
GO:0034724	DNA replication-independent nucleosome organization	biological_process	7	TRINITY_DN24938_c0_g1	1	200
GO:0034599	cellular response to oxidative stress	biological_process	6	TRINITY_DN17495_c0_g1	1	200
GO:0033612	receptor serine/threonine kinase binding	molecular_function	6	TRINITY_DN21052_c0_g2	1	200
GO:0033609	oxalate metabolic process	biological_process	9	TRINITY_DN11605_c0_g1	1	200
GO:0033320	UDP-D-xylose biosynthetic process	biological_process	10	TRINITY_DN17114_c0_g1	1	200
GO:0033186	CAF-1 complex	cellular_component	4	TRINITY_DN20933_c1_g1	1	200
GO:0032968	positive regulation of transcription elongation from RNA polymerase II promoter	biological_process	11	TRINITY_DN24938_c0_g1	1	200
GO:0032956	regulation of actin cytoskeleton organization	biological_process	7	TRINITY_DN16980_c1_g3	1	200
GO:0032355	response to estradiol	biological_process	6	TRINITY_DN23757_c0_g1	1	200
GO:0032107	regulation of response to nutrient levels	biological_process	8	TRINITY_DN22936_c0_g4	1	200
GO:0032040	small-subunit processome	cellular_component	6	TRINITY_DN25034_c1_g1	1	200
GO:0032008	positive regulation of TOR signaling	biological_process	10	TRINITY_DN16980_c1_g3	1	200
GO:0031977	thylakoid lumen	cellular_component	6	TRINITY_DN24811_c0_g1	1	200
GO:0031966	mitochondrial membrane	cellular_component	5	TRINITY_DN25297_c1_g2	1	200
GO:0031965	nuclear membrane	cellular_component	5	TRINITY_DN25289_c0_g1	1	200
GO:0031957	very long-chain fatty acid-CoA ligase activity	molecular_function	8	TRINITY_DN24714_c0_g1	1	200
GO:0031932	TORC2 complex	cellular_component	4	TRINITY_DN16980_c1_g3	1	200
GO:0031931	TORC1 complex	cellular_component	4	TRINITY_DN16980_c1_g3	1	200
GO:0031929	TOR signaling	biological_process	6	TRINITY_DN16980_c1_g3	1	200
GO:0031648	protein destabilization	biological_process	6	TRINITY_DN25150_c0_g3	1	200
GO:0031540	regulation of anthocyanin biosynthetic process	biological_process	8	TRINITY_DN19308_c1_g2	1	200
GO:0031491	nucleosome binding	molecular_function	5	TRINITY_DN24938_c0_g1	1	200
GO:0031468	nuclear envelope reassembly	biological_process	7	TRINITY_DN17031_c0_g7	1	200
GO:0031463	Cul3-RING ubiquitin ligase complex	cellular_component	7	TRINITY_DN23711_c0_g2	1	200
GO:0031428	box C/D snoRNP complex	cellular_component	6	TRINITY_DN25034_c1_g1	1	200
GO:0031201	SNARE complex	cellular_component	6	TRINITY_DN12599_c1_g1	1	200
GO:0031087	deadenylation-independent decapping of nuclear-transcribed mRNA	biological_process	9	TRINITY_DN25655_c1_g1	1	200
GO:0031047	gene silencing by RNA	biological_process	5	TRINITY_DN22017_c0_g1	1	200
GO:0031000	response to caffeine	biological_process	6	TRINITY_DN23757_c0_g1	1	200
GO:0030515	snoRNA binding	molecular_function	7	TRINITY_DN25034_c1_g1	1	200
GO:0030422	production of siRNA involved in RNA interference	biological_process	12	TRINITY_DN19212_c1_g2	1	200
GO:0030247	polysaccharide binding	molecular_function	5	TRINITY_DN14166_c0_g2	1	200
GO:0030246	carbohydrate binding	molecular_function	4	TRINITY_DN12590_c0_g1	1	200
GO:0030244	cellulose biosynthetic process	biological_process	11	TRINITY_DN23731_c0_g3	1	200
GO:0030095	chloroplast photosystem II	cellular_component	8	TRINITY_DN24811_c0_g1	1	200
GO:0022627	cytosolic small ribosomal subunit	cellular_component	8	TRINITY_DN18027_c0_g3	1	200
GO:0022625	cytosolic large ribosomal subunit	cellular_component	8	TRINITY_DN18599_c0_g1	1	200
GO:0019684	photosynthesis, light reaction	biological_process	6	TRINITY_DN24811_c0_g1	1	200
GO:0019048	modulation by virus of host morphology or physiology	biological_process	7	TRINITY_DN22017_c0_g1	1	200
GO:0018026	peptidyl-lysine monomethylation	biological_process	12	TRINITY_DN24621_c0_g1	1	200
GO:0018023	peptidyl-lysine trimethylation	biological_process	12	TRINITY_DN24621_c0_g1	1	200
GO:0017108	5'-flap endonuclease activity	molecular_function	10	TRINITY_DN14304_c1_g2	1	200
GO:0017025	TBP-class protein binding	molecular_function	7	TRINITY_DN26094_c0_g1	1	200
GO:0016874	ligase activity	molecular_function	4	TRINITY_DN24714_c0_g1	1	200
GO:0016791	phosphatase activity	molecular_function	7	TRINITY_DN19093_c1_g3	1	200
GO:0016760	cellulose synthase (UDP-forming) activity	molecular_function	9	TRINITY_DN23731_c0_g3	1	200
GO:0016759	cellulose synthase activity	molecular_function	8	TRINITY_DN23731_c0_g3	1	200
GO:0016742	hydroxymethyl-, formyl- and related transferase activity	molecular_function	6	TRINITY_DN20292_c0_g2	1	200
GO:0016722	oxidoreductase activity, oxidizing metal ions	molecular_function	5	TRINITY_DN21138_c0_g2	1	200
GO:0016671	oxidoreductase activity, acting on a sulfur group of donors, disulfide as acceptor	molecular_function	6	TRINITY_DN17495_c0_g1	1	200
GO:0016607	nuclear speck	cellular_component	8	TRINITY_DN25150_c0_g3	1	200
GO:0016567	protein ubiquitination	biological_process	11	TRINITY_DN25150_c0_g3	1	200
GO:0016485	protein processing	biological_process	8	TRINITY_DN17385_c0_g2	1	200
GO:0016442	RISC complex	cellular_component	6	TRINITY_DN19212_c1_g2	1	200
GO:0016311	dephosphorylation	biological_process	7	TRINITY_DN26117_c0_g1	1	200
GO:0016310	phosphorylation	biological_process	7	TRINITY_DN21843_c0_g2	1	200
GO:0016279	protein-lysine N-methyltransferase activity	molecular_function	8	TRINITY_DN24621_c0_g1	1	200
GO:0016075	rRNA catabolic process	biological_process	11	TRINITY_DN20130_c0_g4	1	200
GO:0015908	fatty acid transport	biological_process	8	TRINITY_DN17015_c0_g2	1	200
GO:0015431	glutathione S-conjugate-exporting ATPase activity	molecular_function	10	TRINITY_DN19147_c0_g1	1	200
GO:0015245	fatty acid transmembrane transporter activity	molecular_function	5	TRINITY_DN17015_c0_g2	1	200
GO:0015035	protein disulfide oxidoreductase activity	molecular_function	7	TRINITY_DN17495_c0_g1	1	200
GO:0012505	endomembrane system	cellular_component	4	TRINITY_DN12599_c1_g1	1	200
GO:0010928	regulation of auxin mediated signaling pathway	biological_process	8	TRINITY_DN21141_c0_g4	1	200
GO:0010598	NAD(P)H dehydrogenase complex (plastoquinone)	cellular_component	5	TRINITY_DN23135_c0_g1	1	200
GO:0010540	basipetal auxin transport	biological_process	9	TRINITY_DN20559_c1_g2	1	200
GO:0010492	maintenance of shoot apical meristem identity	biological_process	6	TRINITY_DN25356_c0_g1	1	200
GO:0010431	seed maturation	biological_process	5	TRINITY_DN25297_c1_g2	1	200
GO:0010427	abscisic acid binding	molecular_function	6	TRINITY_DN20860_c0_g1	1	200
GO:0010369	chromocenter	cellular_component	7	TRINITY_DN25289_c0_g1	1	200
GO:0010358	leaf shaping	biological_process	5	TRINITY_DN25628_c0_g3	1	200
GO:0010321	regulation of vegetative phase change	biological_process	8	TRINITY_DN15141_c0_g3	1	200
GO:0010305	leaf vascular tissue pattern formation	biological_process	7	TRINITY_DN21141_c0_g4	1	200
GO:0010290	chlorophyll catabolite transmembrane transporter activity	molecular_function	5	TRINITY_DN19147_c0_g1	1	200
GO:0010192	mucilage biosynthetic process	biological_process	6	TRINITY_DN23731_c0_g3	1	200
GO:0010181	FMN binding	molecular_function	7	TRINITY_DN21777_c0_g1	1	200
GO:0010152	pollen maturation	biological_process	5	TRINITY_DN21052_c0_g2	1	200
GO:0010150	leaf senescence	biological_process	6	TRINITY_DN16807_c0_g1	1	200
GO:0010143	cutin biosynthetic process	biological_process	7	TRINITY_DN24714_c0_g1	1	200
GO:0010133	proline catabolic process to glutamate	biological_process	12	TRINITY_DN20517_c0_g2	1	200
GO:0010071	root meristem specification	biological_process	5	TRINITY_DN25655_c1_g1	1	200
GO:0010055	atrichoblast differentiation	biological_process	8	TRINITY_DN22936_c0_g4	1	200
GO:0010043	response to zinc ion	biological_process	7	TRINITY_DN13124_c0_g5	1	200
GO:0010025	wax biosynthetic process	biological_process	7	TRINITY_DN24714_c0_g1	1	200
GO:0009955	adaxial/abaxial pattern specification	biological_process	6	TRINITY_DN24164_c2_g3	1	200
GO:0009911	positive regulation of flower development	biological_process	9	TRINITY_DN21186_c0_g1	1	200
GO:0009853	photorespiration	biological_process	6	TRINITY_DN20292_c0_g2	1	200
GO:0009833	plant-type primary cell wall biogenesis	biological_process	7	TRINITY_DN23731_c0_g3	1	200
GO:0009832	plant-type cell wall biogenesis	biological_process	6	TRINITY_DN23731_c0_g3	1	200
GO:0009826	unidimensional cell growth	biological_process	7	TRINITY_DN22216_c0_g1	1	200
GO:0009791	post-embryonic development	biological_process	4	TRINITY_DN25655_c1_g1	1	200
GO:0009789	positive regulation of abscisic acid-activated signaling pathway	biological_process	9	TRINITY_DN23345_c0_g1	1	200
GO:0009773	photosynthetic electron transport in photosystem I	biological_process	8	TRINITY_DN23135_c0_g1	1	200
GO:0009744	response to sucrose	biological_process	8	TRINITY_DN23757_c0_g1	1	200
GO:0009743	response to carbohydrate	biological_process	6	TRINITY_DN19308_c1_g2	1	200
GO:0009706	chloroplast inner membrane	cellular_component	7	TRINITY_DN17015_c0_g2	1	200
GO:0009658	chloroplast organization	biological_process	7	TRINITY_DN20610_c0_g4	1	200
GO:0009654	photosystem II oxygen evolving complex	cellular_component	6	TRINITY_DN24811_c0_g1	1	200
GO:0009653	anatomical structure morphogenesis	biological_process	4	TRINITY_DN22028_c1_g1	1	200
GO:0009640	photomorphogenesis	biological_process	8	TRINITY_DN25150_c0_g3	1	200
GO:0009637	response to blue light	biological_process	7	TRINITY_DN15741_c0_g2	1	200
GO:0009615	response to virus	biological_process	7	TRINITY_DN23194_c0_g1	1	200
GO:0009579	thylakoid	cellular_component	5	TRINITY_DN24811_c0_g1	1	200
GO:0009556	microsporogenesis	biological_process	7	TRINITY_DN21052_c0_g2	1	200
GO:0009555	pollen development	biological_process	6	TRINITY_DN22028_c1_g1	1	200
GO:0009543	chloroplast thylakoid lumen	cellular_component	8	TRINITY_DN24811_c0_g1	1	200
GO:0009537	proplastid	cellular_component	7	TRINITY_DN20610_c0_g4	1	200
GO:0009536	plastid	cellular_component	6	TRINITY_DN17015_c0_g2	1	200
GO:0009513	etioplast	cellular_component	7	TRINITY_DN20610_c0_g4	1	200
GO:0009509	chromoplast	cellular_component	7	TRINITY_DN20610_c0_g4	1	200
GO:0009505	plant-type cell wall	cellular_component	6	TRINITY_DN22216_c0_g1	1	200
GO:0009501	amyloplast	cellular_component	7	TRINITY_DN20610_c0_g4	1	200
GO:0009451	RNA modification	biological_process	9	TRINITY_DN22716_c0_g1	1	200
GO:0009423	chorismate biosynthetic process	biological_process	10	TRINITY_DN21777_c0_g1	1	200
GO:0009416	response to light stimulus	biological_process	6	TRINITY_DN17312_c0_g1	1	200
GO:0009413	response to flooding	biological_process	5	TRINITY_DN23757_c0_g1	1	200
GO:0009408	response to heat	biological_process	5	TRINITY_DN26057_c1_g1	1	200
GO:0009294	DNA mediated transformation	biological_process	6	TRINITY_DN26094_c0_g1	1	200
GO:0009225	nucleotide-sugar metabolic process	biological_process	8	TRINITY_DN17114_c0_g1	1	200
GO:0009152	purine ribonucleotide biosynthetic process	biological_process	11	TRINITY_DN20292_c0_g2	1	200
GO:0009073	aromatic amino acid family biosynthetic process	biological_process	10	TRINITY_DN21777_c0_g1	1	200
GO:0009058	biosynthetic process	biological_process	4	TRINITY_DN20292_c0_g2	1	200
GO:0008864	formyltetrahydrofolate deformylase activity	molecular_function	7	TRINITY_DN20292_c0_g2	1	200
GO:0008559	ATPase-coupled xenobiotic transmembrane transporter activity	molecular_function	9	TRINITY_DN19147_c0_g1	1	200
GO:0008483	transaminase activity	molecular_function	6	TRINITY_DN25289_c0_g1	1	200
GO:0008356	asymmetric cell division	biological_process	5	TRINITY_DN16038_c0_g3	1	200
GO:0008266	poly(U) RNA binding	molecular_function	9	TRINITY_DN24811_c0_g1	1	200
GO:0008234	cysteine-type peptidase activity	molecular_function	7	TRINITY_DN15984_c0_g1	1	200
GO:0008152	metabolic process	biological_process	3	TRINITY_DN24714_c0_g1	1	200
GO:0007166	cell surface receptor signaling pathway	biological_process	5	TRINITY_DN21052_c0_g2	1	200
GO:0007030	Golgi organization	biological_process	6	TRINITY_DN17031_c0_g7	1	200
GO:0006972	hyperosmotic response	biological_process	6	TRINITY_DN21409_c0_g2	1	200
GO:0006913	nucleocytoplasmic transport	biological_process	8	TRINITY_DN23194_c0_g1	1	200
GO:0006906	vesicle fusion	biological_process	7	TRINITY_DN12599_c1_g1	1	200
GO:0006904	vesicle docking involved in exocytosis	biological_process	7	TRINITY_DN20474_c0_g5	1	200
GO:0006886	intracellular protein transport	biological_process	10	TRINITY_DN12599_c1_g1	1	200
GO:0006874	cellular calcium ion homeostasis	biological_process	11	TRINITY_DN17312_c0_g1	1	200
GO:0006857	oligopeptide transport	biological_process	9	TRINITY_DN17503_c0_g1	1	200
GO:0006811	ion transport	biological_process	6	TRINITY_DN17312_c0_g1	1	200
GO:0006730	one-carbon metabolic process	biological_process	5	TRINITY_DN20292_c0_g2	1	200
GO:0006633	fatty acid biosynthetic process	biological_process	10	TRINITY_DN24714_c0_g1	1	200
GO:0006631	fatty acid metabolic process	biological_process	9	TRINITY_DN24714_c0_g1	1	200
GO:0006623	protein targeting to vacuole	biological_process	12	TRINITY_DN22951_c0_g2	1	200
GO:0006606	protein import into nucleus	biological_process	11	TRINITY_DN22701_c0_g3	1	200
GO:0006562	proline catabolic process	biological_process	12	TRINITY_DN20517_c0_g2	1	200
GO:0006561	proline biosynthetic process	biological_process	12	TRINITY_DN19925_c0_g1	1	200
GO:0006541	glutamine metabolic process	biological_process	11	TRINITY_DN25292_c1_g2	1	200
GO:0006537	glutamate biosynthetic process	biological_process	12	TRINITY_DN20517_c0_g2	1	200
GO:0006529	asparagine biosynthetic process	biological_process	12	TRINITY_DN25292_c1_g2	1	200
GO:0006457	protein folding	biological_process	4	TRINITY_DN17495_c0_g1	1	200
GO:0006426	glycyl-tRNA aminoacylation	biological_process	13	TRINITY_DN24932_c0_g1	1	200
GO:0006417	regulation of translation	biological_process	9	TRINITY_DN22017_c0_g1	1	200
GO:0006412	translation	biological_process	8	TRINITY_DN24365_c0_g1	1	200
GO:0006368	transcription elongation from RNA polymerase II promoter	biological_process	9	TRINITY_DN24938_c0_g1	1	200
GO:0006364	rRNA processing	biological_process	11	TRINITY_DN20130_c0_g4	1	200
GO:0006260	DNA replication	biological_process	8	TRINITY_DN24938_c0_g1	1	200
GO:0006189	'de novo' IMP biosynthetic process	biological_process	13	TRINITY_DN20292_c0_g2	1	200
GO:0005992	trehalose biosynthetic process	biological_process	9	TRINITY_DN19093_c1_g3	1	200
GO:0005960	glycine cleavage complex	cellular_component	6	TRINITY_DN23054_c2_g2	1	200
GO:0005887	integral component of plasma membrane	cellular_component	6	TRINITY_DN16922_c0_g1	1	200
GO:0005802	trans-Golgi network	cellular_component	7	TRINITY_DN19359_c0_g1	1	200
GO:0005788	endoplasmic reticulum lumen	cellular_component	7	TRINITY_DN21152_c0_g1	1	200
GO:0005765	lysosomal membrane	cellular_component	9	TRINITY_DN22216_c0_g1	1	200
GO:0005764	lysosome	cellular_component	8	TRINITY_DN12598_c0_g1	1	200
GO:0005719	nuclear euchromatin	cellular_component	8	TRINITY_DN24938_c0_g1	1	200
GO:0005681	spliceosomal complex	cellular_component	6	TRINITY_DN24349_c0_g1	1	200
GO:0005669	transcription factor TFIID complex	cellular_component	7	TRINITY_DN26094_c0_g1	1	200
GO:0005667	transcription factor complex	cellular_component	4	TRINITY_DN22642_c0_g4	1	200
GO:0005655	nucleolar ribonuclease P complex	cellular_component	9	TRINITY_DN24027_c0_g1	1	200
GO:0005654	nucleoplasm	cellular_component	6	TRINITY_DN25289_c0_g1	1	200
GO:0005635	nuclear envelope	cellular_component	6	TRINITY_DN22701_c0_g3	1	200
GO:0005615	extracellular space	cellular_component	4	TRINITY_DN12598_c0_g1	1	200
GO:0005525	GTP binding	molecular_function	8	TRINITY_DN23194_c0_g1	1	200
GO:0005509	calcium ion binding	molecular_function	7	TRINITY_DN24811_c0_g1	1	200
GO:0005507	copper ion binding	molecular_function	8	TRINITY_DN21138_c0_g2	1	200
GO:0005484	SNAP receptor activity	molecular_function	5	TRINITY_DN12599_c1_g1	1	200
GO:0005388	ATPase-coupled calcium transmembrane transporter activity	molecular_function	10	TRINITY_DN16922_c0_g1	1	200
GO:0005385	zinc ion transmembrane transporter activity	molecular_function	10	TRINITY_DN13124_c0_g5	1	200
GO:0005217	intracellular ligand-gated ion channel activity	molecular_function	8	TRINITY_DN17312_c0_g1	1	200
GO:0005215	transporter activity	molecular_function	3	TRINITY_DN17503_c0_g1	1	200
GO:0005096	GTPase activator activity	molecular_function	6	TRINITY_DN23194_c0_g1	1	200
GO:0004970	ionotropic glutamate receptor activity	molecular_function	7	TRINITY_DN17312_c0_g1	1	200
GO:0004869	cysteine-type endopeptidase inhibitor activity	molecular_function	8	TRINITY_DN21409_c0_g2	1	200
GO:0004864	protein phosphatase inhibitor activity	molecular_function	7	TRINITY_DN20860_c0_g1	1	200
GO:0004820	glycine-tRNA ligase activity	molecular_function	7	TRINITY_DN24932_c0_g1	1	200
GO:0004805	trehalose-phosphatase activity	molecular_function	9	TRINITY_DN19093_c1_g3	1	200
GO:0004721	phosphoprotein phosphatase activity	molecular_function	8	TRINITY_DN25889_c1_g1	1	200
GO:0004707	MAP kinase activity	molecular_function	9	TRINITY_DN25308_c0_g1	1	200
GO:0004693	cyclin-dependent protein serine/threonine kinase activity	molecular_function	9	TRINITY_DN22626_c0_g2	1	200
GO:0004675	transmembrane receptor protein serine/threonine kinase activity	molecular_function	9	TRINITY_DN21052_c0_g2	1	200
GO:0004672	protein kinase activity	molecular_function	7	TRINITY_DN25889_c1_g1	1	200
GO:0004657	proline dehydrogenase activity	molecular_function	6	TRINITY_DN20517_c0_g2	1	200
GO:0004650	polygalacturonase activity	molecular_function	7	TRINITY_DN21125_c0_g1	1	200
GO:0004566	beta-glucuronidase activity	molecular_function	7	TRINITY_DN22216_c0_g1	1	200
GO:0004553	hydrolase activity, hydrolyzing O-glycosyl compounds	molecular_function	6	TRINITY_DN14166_c0_g2	1	200
GO:0004526	ribonuclease P activity	molecular_function	9	TRINITY_DN24027_c0_g1	1	200
GO:0004525	ribonuclease III activity	molecular_function	10	TRINITY_DN19212_c1_g2	1	200
GO:0004518	nuclease activity	molecular_function	6	TRINITY_DN14304_c1_g2	1	200
GO:0004467	long-chain fatty acid-CoA ligase activity	molecular_function	8	TRINITY_DN24714_c0_g1	1	200
GO:0004402	histone acetyltransferase activity	molecular_function	11	TRINITY_DN26094_c0_g1	1	200
GO:0004386	helicase activity	molecular_function	9	TRINITY_DN18513_c1_g5	1	200
GO:0004350	glutamate-5-semialdehyde dehydrogenase activity	molecular_function	7	TRINITY_DN19925_c0_g1	1	200
GO:0004252	serine-type endopeptidase activity	molecular_function	8	TRINITY_DN18320_c0_g1	1	200
GO:0004222	metalloendopeptidase activity	molecular_function	8	TRINITY_DN17385_c0_g2	1	200
GO:0004197	cysteine-type endopeptidase activity	molecular_function	8	TRINITY_DN12598_c0_g1	1	200
GO:0004185	serine-type carboxypeptidase activity	molecular_function	9	TRINITY_DN22714_c0_g4	1	200
GO:0004107	chorismate synthase activity	molecular_function	7	TRINITY_DN21777_c0_g1	1	200
GO:0004066	asparagine synthase (glutamine-hydrolyzing) activity	molecular_function	7	TRINITY_DN25292_c1_g2	1	200
GO:0004029	aldehyde dehydrogenase (NAD) activity	molecular_function	7	TRINITY_DN20407_c0_g1	1	200
GO:0004022	alcohol dehydrogenase (NAD) activity	molecular_function	7	TRINITY_DN23757_c0_g1	1	200
GO:0004020	adenylylsulfate kinase activity	molecular_function	7	TRINITY_DN15703_c0_g1	1	200
GO:0004012	ATPase-coupled phospholipid transporter activity	molecular_function	6	TRINITY_DN25182_c0_g1	1	200
GO:0003993	acid phosphatase activity	molecular_function	8	TRINITY_DN26117_c0_g1	1	200
GO:0003964	RNA-directed DNA polymerase activity	molecular_function	8	TRINITY_DN22115_c0_g1	1	200
GO:0003825	alpha,alpha-trehalose-phosphate synthase (UDP-forming) activity	molecular_function	8	TRINITY_DN19093_c1_g3	1	200
GO:0003824	catalytic activity	molecular_function	3	TRINITY_DN17114_c0_g1	1	200
GO:0003779	actin binding	molecular_function	6	TRINITY_DN25860_c0_g1	1	200
GO:0003714	transcription corepressor activity	molecular_function	5	TRINITY_DN17628_c0_g1	1	200
GO:0003713	transcription coactivator activity	molecular_function	5	TRINITY_DN22642_c0_g4	1	200
GO:0002181	cytoplasmic translation	biological_process	9	TRINITY_DN18599_c0_g1	1	200
GO:0002020	protease binding	molecular_function	6	TRINITY_DN21409_c0_g2	1	200
GO:0001666	response to hypoxia	biological_process	5	TRINITY_DN23757_c0_g1	1	200
GO:0000987	proximal promoter sequence-specific DNA binding	molecular_function	9	TRINITY_DN22028_c1_g1	1	200
GO:0000978	RNA polymerase II proximal promoter sequence-specific DNA binding	molecular_function	10	TRINITY_DN22936_c0_g4	1	200
GO:0000977	RNA polymerase II regulatory region sequence-specific DNA binding	molecular_function	9	TRINITY_DN23731_c0_g3	1	200
GO:0000822	inositol hexakisphosphate binding	molecular_function	5	TRINITY_DN21628_c1_g1	1	200
GO:0000786	nucleosome	cellular_component	5	TRINITY_DN18132_c0_g1	1	200
GO:0000463	maturation of LSU-rRNA from tricistronic rRNA transcript (SSU-rRNA, 5.8S rRNA, LSU-rRNA)	biological_process	13	TRINITY_DN18599_c0_g1	1	200
GO:0000462	maturation of SSU-rRNA from tricistronic rRNA transcript (SSU-rRNA, 5.8S rRNA, LSU-rRNA)	biological_process	13	TRINITY_DN18027_c0_g3	1	200
GO:0000386	second spliceosomal transesterification activity	molecular_function	5	TRINITY_DN24349_c0_g1	1	200
GO:0000325	plant-type vacuole	cellular_component	7	TRINITY_DN19147_c0_g1	1	200
GO:0000209	protein polyubiquitination	biological_process	12	TRINITY_DN23033_c0_g1	1	200
GO:0000177	cytoplasmic exosome (RNase complex)	cellular_component	6	TRINITY_DN20130_c0_g4	1	200
GO:0000176	nuclear exosome (RNase complex)	cellular_component	6	TRINITY_DN20130_c0_g4	1	200
GO:0000175	3'-5'-exoribonuclease activity	molecular_function	9	TRINITY_DN20130_c0_g4	1	200
GO:0000154	rRNA modification	biological_process	12	TRINITY_DN25034_c1_g1	1	200
GO:0000149	SNARE binding	molecular_function	5	TRINITY_DN12599_c1_g1	1	200
GO:0000145	exocyst	cellular_component	7	TRINITY_DN20474_c0_g5	1	200
GO:0000122	negative regulation of transcription by RNA polymerase II	biological_process	10	TRINITY_DN22936_c0_g4	1	200

## Sheet: KEGG annotation
pathway_ID	pathway_name	Genes	S gene number	TS gene number
ko04075	Plant hormone signal transduction	TRINITY_DN22028_c1_g1;TRINITY_DN17108_c3_g1;TRINITY_DN20860_c0_g1;TRINITY_DN14117_c0_g2;TRINITY_DN21834_c0_g2;TRINITY_DN21628_c1_g1;TRINITY_DN25356_c0_g1;TRINITY_DN19663_c0_g1;TRINITY_DN25293_c1_g2;TRINITY_DN25283_c0_g4;TRINITY_DN25628_c0_g3;TRINITY_DN24102_c0_g1;TRINITY_DN25283_c0_g5;TRINITY_DN19308_c1_g2	14	78
ko04016	MAPK signaling pathway - plant	TRINITY_DN25283_c0_g5;TRINITY_DN14117_c0_g2;TRINITY_DN22936_c0_g4;TRINITY_DN25293_c1_g2;TRINITY_DN25308_c0_g1;TRINITY_DN20860_c0_g1;TRINITY_DN25283_c0_g4	7	78
ko00402	Benzoxazinoid biosynthesis	TRINITY_DN18769_c0_g4	1	78
ko00071	Fatty acid degradation	TRINITY_DN23757_c0_g1;TRINITY_DN24714_c0_g1;TRINITY_DN20407_c0_g1	3	78
ko00670	One carbon pool by folate	TRINITY_DN20292_c0_g2;TRINITY_DN23054_c2_g2	2	78
ko00630	Glyoxylate and dicarboxylate metabolism	TRINITY_DN21884_c0_g2;TRINITY_DN20292_c0_g2;TRINITY_DN21884_c0_g1;TRINITY_DN23054_c2_g2	4	78
ko00330	Arginine and proline metabolism	TRINITY_DN20407_c0_g1;TRINITY_DN20517_c0_g2;TRINITY_DN19925_c0_g1	3	78
ko00290	Valine, leucine and isoleucine biosynthesis	TRINITY_DN25289_c0_g1;TRINITY_DN26260_c0_g2	2	78
ko00531	Glycosaminoglycan degradation	TRINITY_DN16038_c0_g3;TRINITY_DN22216_c0_g1	2	78
ko00260	Glycine, serine and threonine metabolism	TRINITY_DN23054_c2_g2;TRINITY_DN20648_c0_g3;TRINITY_DN20648_c0_g1	3	78
ko00770	Pantothenate and CoA biosynthesis	TRINITY_DN25289_c0_g1;TRINITY_DN26260_c0_g2	2	78
ko00280	Valine, leucine and isoleucine degradation	TRINITY_DN25289_c0_g1;TRINITY_DN20407_c0_g1;TRINITY_DN26260_c0_g2	3	78
ko00261	Monobactam biosynthesis	TRINITY_DN15703_c0_g1	1	78
ko00903	Limonene and pinene degradation	TRINITY_DN20407_c0_g1	1	78
ko00908	Zeatin biosynthesis	TRINITY_DN21819_c0_g3	1	78
ko04141	Protein processing in endoplasmic reticulum	TRINITY_DN20612_c0_g1;TRINITY_DN22199_c1_g1;TRINITY_DN17031_c0_g7;TRINITY_DN19297_c0_g2;TRINITY_DN26057_c1_g1;TRINITY_DN21152_c0_g1	6	78
ko03018	RNA degradation	TRINITY_DN25655_c1_g1;TRINITY_DN23959_c0_g2;TRINITY_DN21492_c0_g1;TRINITY_DN23959_c0_g5	4	78
ko00740	Riboflavin metabolism	TRINITY_DN21506_c0_g1	1	78
ko00604	Glycosphingolipid biosynthesis - ganglio series	TRINITY_DN16038_c0_g3	1	78
ko00052	Galactose metabolism	TRINITY_DN21122_c0_g2;TRINITY_DN16038_c0_g3	2	78
ko00790	Folate biosynthesis	TRINITY_DN17164_c1_g2	1	78
ko00340	Histidine metabolism	TRINITY_DN20407_c0_g1	1	78
ko00010	Glycolysis / Gluconeogenesis	TRINITY_DN13312_c0_g1;TRINITY_DN23757_c0_g1;TRINITY_DN20407_c0_g1	3	78
ko00020	Citrate cycle (TCA cycle)	TRINITY_DN21884_c0_g1;TRINITY_DN21884_c0_g2	2	78
ko00195	Photosynthesis	TRINITY_DN23033_c0_g1;TRINITY_DN24811_c0_g1	2	78
ko04130	SNARE interactions in vesicular transport	TRINITY_DN12599_c1_g1	1	78
ko00920	Sulfur metabolism	TRINITY_DN15703_c0_g1	1	78
ko04933	AGE-RAGE signaling pathway in diabetic complications	TRINITY_DN17396_c0_g1	1	78
ko00350	Tyrosine metabolism	TRINITY_DN23757_c0_g1	1	78
ko04145	Phagosome	TRINITY_DN21152_c0_g1;TRINITY_DN12598_c0_g1	2	78
ko00511	Other glycan degradation	TRINITY_DN16038_c0_g3	1	78
ko00450	Selenocompound metabolism	TRINITY_DN15703_c0_g1	1	78
ko00053	Ascorbate and aldarate metabolism	TRINITY_DN21138_c0_g2;TRINITY_DN20407_c0_g1	2	78
ko04136	Autophagy - other	TRINITY_DN16980_c1_g3	1	78
ko00400	Phenylalanine, tyrosine and tryptophan biosynthesis	TRINITY_DN21777_c0_g1	1	78
ko03008	Ribosome biogenesis in eukaryotes	TRINITY_DN25907_c0_g1;TRINITY_DN25034_c1_g1	2	78
ko03022	Basal transcription factors	TRINITY_DN26094_c0_g1	1	78
ko00600	Sphingolipid metabolism	TRINITY_DN16038_c0_g3	1	78
ko00380	Tryptophan metabolism	TRINITY_DN20407_c0_g1	1	78
ko00130	Ubiquinone and other terpenoid-quinone biosynthesis	TRINITY_DN22294_c0_g1	1	78
ko00410	beta-Alanine metabolism	TRINITY_DN20407_c0_g1	1	78
ko00270	Cysteine and methionine metabolism	TRINITY_DN26260_c0_g2;TRINITY_DN25289_c0_g1	2	78
ko00592	alpha-Linolenic acid metabolism	TRINITY_DN23757_c0_g1	1	78
ko03440	Homologous recombination	TRINITY_DN23262_c0_g1	1	78
ko00310	Lysine degradation	TRINITY_DN20407_c0_g1	1	78
ko00500	Starch and sucrose metabolism	TRINITY_DN14166_c0_g2;TRINITY_DN21122_c0_g2;TRINITY_DN19093_c1_g3	3	78
ko03020	RNA polymerase	TRINITY_DN22811_c0_g2	1	78
ko00061	Fatty acid biosynthesis	TRINITY_DN24714_c0_g1	1	78
ko00051	Fructose and mannose metabolism	TRINITY_DN13312_c0_g1	1	78
ko04120	Ubiquitin mediated proteolysis	TRINITY_DN16250_c0_g1;TRINITY_DN13919_c0_g5	2	78
ko00030	Pentose phosphate pathway	TRINITY_DN13312_c0_g1	1	78
ko00561	Glycerolipid metabolism	TRINITY_DN20407_c0_g1	1	78
ko03015	mRNA surveillance pathway	TRINITY_DN23959_c0_g5;TRINITY_DN23959_c0_g2	2	78
ko00230	Purine metabolism	TRINITY_DN22811_c0_g2;TRINITY_DN15703_c0_g1	2	78
ko03040	Spliceosome	TRINITY_DN24349_c0_g1;TRINITY_DN23614_c0_g1;TRINITY_DN18240_c0_g1;TRINITY_DN25994_c1_g2	4	78
ko00710	Carbon fixation in photosynthetic organisms	TRINITY_DN13312_c0_g1	1	78
ko00970	Aminoacyl-tRNA biosynthesis	TRINITY_DN24932_c0_g1	1	78
ko04626	Plant-pathogen interaction	TRINITY_DN25293_c1_g2;TRINITY_DN21012_c0_g1;TRINITY_DN22936_c0_g4	3	78
ko04146	Peroxisome	TRINITY_DN24714_c0_g1	1	78
ko04144	Endocytosis	TRINITY_DN21125_c0_g1;TRINITY_DN20679_c0_g1	2	78
ko02010	ABC transporters	TRINITY_DN19147_c0_g1	1	78
ko00620	Pyruvate metabolism	TRINITY_DN20407_c0_g1	1	78
ko00240	Pyrimidine metabolism	TRINITY_DN22811_c0_g2	1	78
ko00520	Amino sugar and nucleotide sugar metabolism	TRINITY_DN17114_c0_g1	1	78
ko00190	Oxidative phosphorylation	TRINITY_DN23033_c0_g1	1	78
ko03010	Ribosome	TRINITY_DN18599_c0_g1;TRINITY_DN18027_c0_g3	2	78
ko03013	RNA transport	TRINITY_DN23959_c0_g2;TRINITY_DN23959_c0_g5	2	78
