# Supplementary material for: Utilization of Transcriptome, Small RNA, and Degradome Sequencing to Provide Insights Into Drought Stress and Rewatering Treatment in Medicago ruthenica
Source: Front Plant Sci. 2021 Aug 3;12:675903. doi: 10.3389/fpls.2021.675903 (PMC8369265; doi:10.3389/fpls.2021.675903)
Supplement: Supplementary file 11 [file Table_11.XLSX]

## Sheet: DS vs. CK
miR_name	regulation	log2(fold_change)	pvalue(t_test)	CK(mean)	DS(mean)	significant	Transcript	Transcript Annotation	GO	KEGG	FPKM.DS(mean)	FPKM.CK(mean)	log2fold_change	regulation	pvalue	significant
PC-5p-81557_56	down	-3.3	0.01	25.83	2.63	yes	TRINITY_DN18751_c1_g2	nodulin-related protein 1 [Medicago truncatula]	GO:0003674(molecular_function);GO:0005575(cellular_component);GO:0009408(response to heat);GO:0009409(response to cold);GO:0009617(response to bacterium);GO:0009738(abscisic acid-activated signaling pathway)	-	56.71	133.63	-1.07	down	0.03	yes
gma-miR1509b_2ss8AG18GA	up	1.14	0.01	37.73	83.17	yes	TRINITY_DN24211_c0_g1	unknown [Medicago truncatula]	GO:0005634(nucleus)	ko04141(Protein processing in endoplasmic reticulum)	278.68	71.64	2.17	up	0	yes
gma-miR159d	down	-0.46	0.02	369.44	267.66	yes	TRINITY_DN17623_c0_g1	unknown [Medicago truncatula]	GO:0004413(homoserine kinase activity);GO:0005524(ATP binding);GO:0006952(defense response);GO:0009086(methionine biosynthetic process);GO:0009088(threonine biosynthetic process);GO:0009092(homoserine metabolic process);GO:0009507(chloroplast);GO:0009570(chloroplast stroma);GO:0009617(response to bacterium);GO:0009620(response to fungus);GO:0016310(phosphorylation)	ko00260(Glycine, serine and threonine metabolism)	3.06	9.85	-1.52	down	0.01	yes
gma-miR171j-5p	down	-1.76	0.04	63.35	18.76	yes	TRINITY_DN16578_c0_g1	uncharacterized protein LOC25496852 [Medicago truncatula]	GO:0003674(molecular_function);GO:0005634(nucleus);GO:0008150(biological_process)	-	345.22	100.88	1.95	up	0	yes
gma-miR171j-5p	down	-1.76	0.04	63.35	18.76	yes	TRINITY_DN17512_c0_g1	kunitz-type elastase inhibitor BrEI [Medicago truncatula]	-	-	258.43	77.71	1.84	up	0.04	yes
lja-miR390a-3p	down	-1.18	0.02	155.35	68.64	yes	TRINITY_DN20251_c0_g2	hypothetical protein TSUD_14780 [Trifolium subterraneum]	GO:0004864(protein phosphatase inhibitor activity);GO:0005634(nucleus);GO:0005737(cytoplasm);GO:0009738(abscisic acid-activated signaling pathway);GO:0010427(abscisic acid binding);GO:0080163(regulation of protein serine/threonine phosphatase activity)	ko04016(MAPK signaling pathway - plant);ko04075(Plant hormone signal transduction)	1.87	13.29	-2.72	down	0	yes
lja-miR390a-3p	down	-1.18	0.02	155.35	68.64	yes	TRINITY_DN22423_c0_g2	probable protein phosphatase 2C 2 [Medicago truncatula]	GO:0004722(protein serine/threonine phosphatase activity);GO:0005634(nucleus);GO:0006470(protein dephosphorylation);GO:0009536(plastid);GO:0009611(response to wounding);GO:0009620(response to fungus);GO:0009738(abscisic acid-activated signaling pathway);GO:0046872(metal ion binding);GO:0050832(defense response to fungus)	-	420.09	16.24	4.87	up	0	yes
mtr-MIR2111n-p3	up	1.28	0.02	49.61	120.36	yes	TRINITY_DN17067_c0_g1	putative adenosylmethionine decarboxylase [Medicago truncatula]	GO:0004014(adenosylmethionine decarboxylase activity);GO:0005829(cytosol);GO:0006597(spermine biosynthetic process);GO:0008295(spermidine biosynthetic process)	ko00270(Cysteine and methionine metabolism);ko00330(Arginine and proline metabolism)	457.48	165.61	1.63	up	0	yes
mtr-MIR2118-p5	down	-2.76	0.04	22.78	3.37	yes	TRINITY_DN16120_c0_g1	scarecrow-like protein 21 [Medicago truncatula]	GO:0003700(DNA binding transcription factor activity);GO:0005634(nucleus);GO:0006355(regulation of transcription, DNA-templated);GO:0043565(sequence-specific DNA binding)	ko04075(Plant hormone signal transduction)	264.2	14.31	4.25	up	0	yes
mtr-MIR2118-p5	down	-2.76	0.04	22.78	3.37	yes	TRINITY_DN24512_c1_g1	putative fructose-bisphosphate aldolase [Medicago truncatula]	GO:0004332(fructose-bisphosphate aldolase activity);GO:0006094(gluconeogenesis);GO:0006096(glycolytic process);GO:0006098(pentose-phosphate shunt);GO:0009507(chloroplast);GO:0009534(chloroplast thylakoid);GO:0009570(chloroplast stroma);GO:0009579(thylakoid);GO:0009941(chloroplast envelope);GO:0010287(plastoglobule);GO:0022626(cytosolic ribosome);GO:0031977(thylakoid lumen);GO:0046686(response to …	ko00010(Glycolysis / Gluconeogenesis);ko00030(Pentose phosphate pathway);ko00051(Fructose and mannose metabolism);ko00710(Carbon fixation in photosynthetic organisms)	4491.18	1838.19	1.47	up	0	yes
mtr-MIR2606a-p5_1	down	-0.7	0.02	155.96	96.29	yes	TRINITY_DN24247_c0_g1	peptidyl-prolyl cis-trans isomerase CYP38, chloroplastic [Medicago truncatula]	GO:0003755(peptidyl-prolyl cis-trans isomerase activity)	-	13.92	40.92	-1.35	down	0.03	yes
mtr-MIR5230-p3_1ss3AG	down	-inf	0	6.53	0	yes	TRINITY_DN14908_c0_g1	UV-B-induced protein At3g17800, chloroplastic-like [Medicago truncatula]	GO:0003674(molecular_function);GO:0005634(nucleus);GO:0009507(chloroplast);GO:0009611(response to wounding);GO:0010193(response to ozone);GO:0010224(response to UV-B)	-	647.23	169.72	2.06	up	0	yes
mtr-MIR5230-p3_1ss3AG	down	-inf	0	6.53	0	yes	TRINITY_DN15657_c0_g3	long-chain-alcohol oxidase FAO4A [Medicago truncatula]	GO:0046577(long-chain-alcohol oxidase activity)	-	0.64	4.96	-2.74	down	0	yes
mtr-MIR5230-p3_1ss3AG	down	-inf	0	6.53	0	yes	TRINITY_DN17507_c0_g1	NAD(P)H-quinone oxidoreductase subunit O, chloroplastic [Medicago truncatula]	GO:0005886(plasma membrane);GO:0009507(chloroplast);GO:0009535(chloroplast thylakoid membrane);GO:0010258(NADH dehydrogenase complex (plastoquinone) assembly);GO:0010598(NAD(P)H dehydrogenase complex (plastoquinone));GO:0016655(oxidoreductase activity, acting on NAD(P)H, quinone or similar compound as acceptor);GO:0048038(quinone binding);GO:0055114(oxidation-reduction process)	-	130.35	71.92	1.06	up	0.02	yes
mtr-MIR5230-p3_1ss3AG	down	-inf	0	6.53	0	yes	TRINITY_DN20655_c0_g1	delta(8)-fatty-acid desaturase 2 [Medicago truncatula]	GO:0005783(endoplasmic reticulum);GO:0005789(endoplasmic reticulum membrane);GO:0016021(integral component of membrane);GO:0016491(oxidoreductase activity);GO:0030148(sphingolipid biosynthetic process);GO:0046872(metal ion binding);GO:0052631(sphingolipid delta-8 desaturase activity);GO:0055114(oxidation-reduction process);GO:0070417(cellular response to cold)	-	111.53	46.74	1.4	up	0	yes
mtr-MIR5230-p3_1ss3AG	down	-inf	0	6.53	0	yes	TRINITY_DN24927_c0_g2	heat shock protein 70 [Medicago sativa]	GO:0002020(protease binding);GO:0005515(protein binding);GO:0005524(ATP binding);GO:0005618(cell wall);GO:0005634(nucleus);GO:0005730(nucleolus);GO:0005737(cytoplasm);GO:0005774(vacuolar membrane);GO:0005794(Golgi apparatus);GO:0005829(cytosol);GO:0005886(plasma membrane);GO:0006351(transcription, DNA-templated);GO:0006355(regulation of transcription, DNA-templated);GO:0006457(protein folding);GO…	ko03040(Spliceosome);ko04141(Protein processing in endoplasmic reticulum);ko04144(Endocytosis)	626.64	236.37	1.59	up	0	yes
mtr-MIR5282-p3	down	-2.75	0.02	18.9	2.81	yes	TRINITY_DN13678_c0_g2	hypothetical protein TorRG33x02_038580 [Trema orientale]	-	-	224.46	126.38	1.05	up	0.01	yes
mtr-MIR5282-p3	down	-2.75	0.02	18.9	2.81	yes	TRINITY_DN17421_c0_g5	cytochrome P450 71A26 [Medicago truncatula]	GO:0016020(membrane);GO:0016709(oxidoreductase activity, acting on paired donors, with incorporation or reduction of molecular oxygen, NAD(P)H as one donor, and incorporation of one atom of oxygen);GO:0044550(secondary metabolite biosynthetic process)	-	29.5	11.31	1.55	up	0.02	yes
mtr-MIR5282-p3	down	-2.75	0.02	18.9	2.81	yes	TRINITY_DN17481_c1_g1	receptor-like kinase plant [Medicago truncatula]	GO:0004674(protein serine/threonine kinase activity);GO:0005524(ATP binding);GO:0005886(plasma membrane);GO:0016021(integral component of membrane);GO:0016301(kinase activity);GO:0046777(protein autophosphorylation)	-	12.24	35.74	-1.29	down	0.01	yes
mtr-MIR5282-p3	down	-2.75	0.02	18.9	2.81	yes	TRINITY_DN18506_c0_g1	dormancy-associated protein homolog 3 isoform X2 [Medicago truncatula]	GO:0003674(molecular_function);GO:0005634(nucleus)	-	26.04	65.75	-1.34	down	0.04	yes
mtr-miR2119	down	-inf	0.04	30.49	0	yes	TRINITY_DN21843_c0_g1	guanylate kinase 3, chloroplastic [Medicago truncatula]	GO:0004385(guanylate kinase activity);GO:0005524(ATP binding);GO:0009507(chloroplast);GO:0016310(phosphorylation);GO:0048638(regulation of developmental growth)	ko00230(Purine metabolism)	51.81	9.64	2.6	up	0	yes
mtr-miR2119	down	-inf	0.04	30.49	0	yes	TRINITY_DN22862_c0_g2	serine decarboxylase [Medicago truncatula]	GO:0005829(cytosol);GO:0005886(plasma membrane);GO:0006520(cellular amino acid metabolic process);GO:0006580(ethanolamine metabolic process);GO:0009793(embryo development ending in seed dormancy);GO:0016831(carboxy-lyase activity);GO:0019752(carboxylic acid metabolic process);GO:0030170(pyridoxal phosphate binding)	ko00340(Histidine metabolism)	144.24	78.67	1.02	up	0.02	yes
mtr-miR396a-3p_L-1	down	-0.51	0.03	142.85	100.14	yes	TRINITY_DN15362_c0_g3	E3 ubiquitin-protein ligase RDUF2 [Medicago truncatula]	GO:0000209(protein polyubiquitination);GO:0043161(proteasome-mediated ubiquitin-dependent protein catabolic process);GO:0061630(ubiquitin protein ligase activity)	-	157.47	14.8	3.59	up	0	yes
mtr-miR396a-3p_L-1	down	-0.51	0.03	142.85	100.14	yes	TRINITY_DN16444_c0_g2	crocetin glucosyltransferase, chloroplastic [Medicago truncatula]	GO:0009813(flavonoid biosynthetic process);GO:0043231(intracellular membrane-bounded organelle);GO:0052696(flavonoid glucuronidation);GO:0080043(quercetin 3-O-glucosyltransferase activity);GO:0080044(quercetin 7-O-glucosyltransferase activity)	-	31.79	14.79	1.18	up	0.03	yes
mtr-miR396a-5p	down	-0.39	0.02	95428.1	72767.8	yes	TRINITY_DN15305_c0_g6	WRKY transcription factor 56 [Medicago sativa]	GO:0002237(response to molecule of bacterial origin);GO:0003700(DNA binding transcription factor activity);GO:0005515(protein binding);GO:0005634(nucleus);GO:0006351(transcription, DNA-templated);GO:0006355(regulation of transcription, DNA-templated);GO:0009611(response to wounding);GO:0009751(response to salicylic acid);GO:0010200(response to chitin);GO:0031347(regulation of defense response);GO…	ko04626(Plant-pathogen interaction)	153.48	33.48	2.37	up	0	yes
mtr-miR396a-5p	down	-0.39	0.02	95428.1	72767.8	yes	TRINITY_DN18605_c0_g2	phosphoglycerate mutase-like protein 1 isoform X1 [Medicago truncatula]	GO:0005829(cytosol);GO:0050278(sedoheptulose-bisphosphatase activity)	-	7.76	27.19	-1.61	down	0	yes
mtr-miR396a-5p	down	-0.39	0.02	95428.1	72767.8	yes	TRINITY_DN19288_c0_g1	zinc finger protein CONSTANS-LIKE 6 [Medicago truncatula]	GO:0005634(nucleus)	ko04712(Circadian rhythm - plant)	26.21	61.03	-1.02	down	0.03	yes
mtr-miR396a-5p	down	-0.39	0.02	95428.1	72767.8	yes	TRINITY_DN20241_c0_g3	protein DOS2 [Medicago truncatula]	GO:0003674(molecular_function);GO:0005737(cytoplasm);GO:0008150(biological_process)	-	4.25	13.11	-1.44	down	0.02	yes
mtr-miR396a-5p	down	-0.39	0.02	95428.1	72767.8	yes	TRINITY_DN20346_c0_g1	senescence/dehydration-associated-like protein [Medicago truncatula]	GO:0003674(molecular_function);GO:0005737(cytoplasm);GO:0005886(plasma membrane);GO:0007623(circadian rhythm);GO:0009409(response to cold);GO:0009414(response to water deprivation);GO:0009507(chloroplast);GO:0009644(response to high light intensity);GO:0009651(response to salt stress);GO:0009737(response to abscisic acid)	ko04144(Endocytosis)	88.61	17.23	2.52	up	0	yes
mtr-miR396a-5p	down	-0.39	0.02	95428.1	72767.8	yes	TRINITY_DN22788_c0_g3	geraniol 8-hydroxylase [Medicago truncatula]	GO:0016020(membrane);GO:0016709(oxidoreductase activity, acting on paired donors, with incorporation or reduction of molecular oxygen, NAD(P)H as one donor, and incorporation of one atom of oxygen);GO:0044550(secondary metabolite biosynthetic process)	-	9.07	58.89	-2.52	down	0	yes
mtr-miR396a-5p	down	-0.39	0.02	95428.1	72767.8	yes	TRINITY_DN22964_c0_g2	protein disulfide isomerase pTAC5, chloroplastic [Medicago truncatula]	GO:0000427(plastid-encoded plastid RNA polymerase complex);GO:0003756(protein disulfide isomerase activity);GO:0005515(protein binding);GO:0006355(regulation of transcription, DNA-templated);GO:0009295(nucleoid);GO:0009408(response to heat);GO:0009416(response to light stimulus);GO:0009507(chloroplast);GO:0009508(plastid chromosome);GO:0009534(chloroplast thylakoid);GO:0009535(chloroplast thylako…	-	5.9	34.81	-2.34	down	0	yes
mtr-miR396a-5p	down	-0.39	0.02	95428.1	72767.8	yes	TRINITY_DN23197_c0_g1	scarecrow-like protein 33 [Medicago truncatula]	GO:0003700(DNA binding transcription factor activity);GO:0005634(nucleus);GO:0006355(regulation of transcription, DNA-templated);GO:0043565(sequence-specific DNA binding)	ko04075(Plant hormone signal transduction)	68.67	0.27	8.15	up	0	yes
mtr-miR396a-5p	down	-0.39	0.02	95428.1	72767.8	yes	TRINITY_DN23804_c0_g2	heat shock protein 83 [Medicago truncatula]	GO:0005515(protein binding);GO:0005524(ATP binding);GO:0005730(nucleolus);GO:0005737(cytoplasm);GO:0005794(Golgi apparatus);GO:0005829(cytosol);GO:0005886(plasma membrane);GO:0006457(protein folding);GO:0009408(response to heat);GO:0016020(membrane);GO:0045087(innate immune response);GO:0051082(unfolded protein binding);GO:0051131(chaperone-mediated protein complex assembly);GO:0071277(cellular r…	ko04141(Protein processing in endoplasmic reticulum);ko04626(Plant-pathogen interaction)	30.11	2.88	3.73	up	0	yes
mtr-miR396a-5p	down	-0.39	0.02	95428.1	72767.8	yes	TRINITY_DN24714_c0_g1	long chain acyl-CoA synthetase 1 [Medicago truncatula]	GO:0004467(long-chain fatty acid-CoA ligase activity);GO:0005524(ATP binding);GO:0005634(nucleus);GO:0005783(endoplasmic reticulum);GO:0006631(fatty acid metabolic process);GO:0006633(fatty acid biosynthetic process);GO:0008152(metabolic process);GO:0010025(wax biosynthetic process);GO:0010143(cutin biosynthetic process);GO:0016874(ligase activity);GO:0031957(very long-chain fatty acid-CoA ligase…	ko00061(Fatty acid biosynthesis);ko00071(Fatty acid degradation);ko04146(Peroxisome)	31.66	76.23	-1.06	down	0.02	yes
mtr-miR396a-5p	down	-0.39	0.02	95428.1	72767.8	yes	TRINITY_DN25757_c0_g1	nitrate reductase [NADH] [Medicago truncatula]	GO:0005739(mitochondrion);GO:0005773(vacuole);GO:0005829(cytosol);GO:0005886(plasma membrane);GO:0006809(nitric oxide biosynthetic process);GO:0008940(nitrate reductase activity);GO:0009416(response to light stimulus);GO:0009610(response to symbiotic fungus);GO:0009635(response to herbicide);GO:0009703(nitrate reductase (NADH) activity);GO:0020037(heme binding);GO:0030151(molybdenum ion binding);…	ko00910(Nitrogen metabolism)	218.17	44.18	2.28	up	0	yes
mtr-miR398a-3p_L+1R-1	down	-3.67	0.02	869.36	68.33	yes	TRINITY_DN14014_c0_g1	sigma factor binding protein 2, chloroplastic [Medicago truncatula]	GO:0005515(protein binding);GO:0005634(nucleus);GO:0051091(positive regulation of DNA binding transcription factor activity)	-	21.76	65.71	-1.39	down	0	yes
mtr-miR398a-5p	down	-inf	0.04	34.07	0	yes	TRINITY_DN25174_c0_g2	probable solanesyl-diphosphate synthase 3, chloroplastic [Medicago truncatula]	GO:0006744(ubiquinone biosynthetic process);GO:0008299(isoprenoid biosynthetic process);GO:0009507(chloroplast);GO:0009536(plastid);GO:0009570(chloroplast stroma);GO:0010236(plastoquinone biosynthetic process);GO:0015979(photosynthesis);GO:0046872(metal ion binding);GO:0050347(trans-octaprenyltranstransferase activity);GO:0052924(all-trans-nonaprenyl-diphosphate synthase (geranylgeranyl-diphospha…	ko00900(Terpenoid backbone biosynthesis)	199.86	90.11	1.23	up	0.01	yes
mtr-miR5214-3p_1ss2GA	down	-2.93	0.02	42.95	5.62	yes	TRINITY_DN18523_c1_g1	14-3-3 protein 9 [Medicago truncatula]	GO:0005509(calcium ion binding);GO:0005515(protein binding);GO:0005634(nucleus);GO:0005737(cytoplasm);GO:0005829(cytosol);GO:0005886(plasma membrane);GO:0009570(chloroplast stroma);GO:0019904(protein domain specific binding);GO:0045309(protein phosphorylated amino acid binding);GO:0048528(post-embryonic root development)	-	29.91	83.82	-1.31	down	0	yes

## Sheet: DS vs. RW
miR_name	regulation	log2(fold_change)	pvalue(t_test)	RW(mean)	DS(mean)	significant	Transcript	Transcript Annotation	GO	KEGG	FPKM.DS(mean)	FPKM.RW(mean)	log2fold_change	regulation	pvalue	significant
PC-3p-102950_40	up	inf	0.01	0	8.97	yes	TRINITY_DN19559_c0_g1	cytochrome P450 94B3 [Medicago truncatula]	GO:0004497(monooxygenase activity);GO:0005506(iron ion binding);GO:0009507(chloroplast);GO:0016705(oxidoreductase activity, acting on paired donors, with incorporation or reduction of molecular oxygen);GO:0019825(oxygen binding);GO:0020037(heme binding);GO:0055114(oxidation-reduction process)	ko00073(Cutin, suberine and wax biosynthesis)	1.28	15.54	-2.49	down	0.01	yes
PC-3p-102950_40	up	inf	0.01	0	8.97	yes	TRINITY_DN19590_c1_g1	putative heme peroxidase [Medicago truncatula]	GO:0001561(fatty acid alpha-oxidation);GO:0004601(peroxidase activity);GO:0005576(extracellular region);GO:0006629(lipid metabolic process);GO:0006979(response to oxidative stress);GO:0008219(cell death);GO:0009626(plant-type hypersensitive response);GO:0009627(systemic acquired resistance);GO:0009737(response to abscisic acid);GO:0009751(response to salicylic acid);GO:0012511(monolayer-surrounde…	ko00592(alpha-Linolenic acid metabolism)	10.05	30.91	-1.45	down	0	yes
PC-3p-54_81480	up	1.39	0.02	4497.23	11780.5	yes	TRINITY_DN14871_c1_g1	hypothetical protein L195_g028956 [Trifolium pratense]	GO:0003674(molecular_function);GO:0005634(nucleus);GO:0008150(biological_process)	-	34.34	8.88	2	up	0	yes
PC-3p-54_81480	up	1.39	0.02	4497.23	11780.5	yes	TRINITY_DN17929_c0_g2	transcription factor MYC2 [Medicago truncatula]	GO:0003677(DNA binding);GO:0003700(DNA binding transcription factor activity);GO:0005515(protein binding);GO:0005634(nucleus);GO:0005737(cytoplasm);GO:0006351(transcription, DNA-templated);GO:0006355(regulation of transcription, DNA-templated);GO:0010629(negative regulation of gene expression);GO:0046983(protein dimerization activity)	ko04016(MAPK signaling pathway - plant);ko04075(Plant hormone signal transduction)	12.58	4.76	1.44	up	0.01	yes
PC-5p-19253_324	down	-0.93	0.03	143.48	75.49	yes	TRINITY_DN24097_c0_g1	putative 4-alpha-glucanotransferase [Medicago truncatula]	GO:0000023(maltose metabolic process);GO:0000025(maltose catabolic process);GO:0004134(4-alpha-glucanotransferase activity);GO:0005829(cytosol);GO:0005976(polysaccharide metabolic process);GO:0005983(starch catabolic process);GO:0009507(chloroplast);GO:0010297(heteropolysaccharide binding);GO:0102500(beta-maltose 4-alpha-glucanotransferase activity);GO:2001070(starch binding)	ko00500(Starch and sucrose metabolism)	33.58	100.94	-1.52	down	0	yes
gma-MIR1527-p3_1ss4CT	down	-inf	0.04	5.15	0	yes	TRINITY_DN18346_c0_g4	uncharacterized protein LOC11435286 [Medicago truncatula]	-	-	232.13	2.77	6.38	up	0	yes
gma-MIR1527-p3_1ss4CT	down	-inf	0.04	5.15	0	yes	TRINITY_DN23107_c0_g2	GDP-L-galactose phosphorylase 1 [Medicago truncatula]	GO:0005737(cytoplasm);GO:0006006(glucose metabolic process);GO:0080048(GDP-D-glucose phosphorylase activity)	ko00053(Ascorbate and aldarate metabolism)	1605.25	642.96	1.46	up	0	yes
gma-miR159a-3p_1ss21AT	up	0.58	0.01	629.25	943.38	yes	TRINITY_DN11852_c0_g1	uncharacterized protein At1g76070 [Medicago truncatula]	GO:0003674(molecular_function);GO:0008150(biological_process)	-	32.05	4.57	2.88	up	0	yes
gma-miR159a-3p_1ss21AT	up	0.58	0.01	629.25	943.38	yes	TRINITY_DN17320_c1_g2	probable xyloglucan 6-xylosyltransferase 3 isoform X1 [Medicago truncatula]	GO:0000139(Golgi membrane);GO:0005515(protein binding);GO:0005768(endosome);GO:0005794(Golgi apparatus);GO:0005802(trans-Golgi network);GO:0009969(xyloglucan biosynthetic process);GO:0010411(xyloglucan metabolic process);GO:0016021(integral component of membrane);GO:0016740(transferase activity);GO:0016757(transferase activity, transferring glycosyl groups);GO:0016758(transferase activity, transf…	-	61.93	28.73	1.53	up	0	yes
gma-miR159a-3p_1ss21AT	up	0.58	0.01	629.25	943.38	yes	TRINITY_DN20806_c0_g1	UV-B-induced protein At3g17800, chloroplastic [Medicago truncatula]	GO:0008150(biological_process);GO:0008483(transaminase activity);GO:0009507(chloroplast)	-	10.09	77.6	-2.71	down	0	yes
gma-miR159a-3p_1ss21AT	up	0.58	0.01	629.25	943.38	yes	TRINITY_DN25909_c1_g3	beta-amyrin synthase [Medicago truncatula]	GO:0016104(triterpenoid biosynthetic process);GO:0042300(beta-amyrin synthase activity)	ko00909(Sesquiterpenoid and triterpenoid biosynthesis)	381.92	175.22	1.31	up	0	yes
gma-miR171j-5p	down	-1.77	0.02	63.93	18.76	yes	TRINITY_DN16578_c0_g1	uncharacterized protein LOC25496852 [Medicago truncatula]	GO:0003674(molecular_function);GO:0005634(nucleus);GO:0008150(biological_process)	-	345.22	90.31	2.07	up	0	yes
gma-miR171j-5p	down	-1.77	0.02	63.93	18.76	yes	TRINITY_DN23921_c0_g1	fasciclin-like arabinogalactan protein 15 [Medicago truncatula]	GO:0003674(molecular_function);GO:0005576(extracellular region);GO:0005773(vacuole);GO:0007155(cell adhesion)	-	63.97	32.93	1.09	up	0.04	yes
mtr-MIR2606a-p5_1	down	-0.65	0.03	151.09	96.29	yes	TRINITY_DN15846_c0_g1	protein FAR1-RELATED SEQUENCE 5-like [Medicago truncatula]	GO:0005515(protein binding);GO:0005634(nucleus);GO:0006355(regulation of transcription, DNA-templated);GO:0008270(zinc ion binding);GO:0009585(red, far-red light phototransduction);GO:0009639(response to red or far red light);GO:0045893(positive regulation of transcription, DNA-templated)	-	22.24	6.78	1.97	up	0.01	yes
mtr-MIR5230-p3_2ss7TG19AG	down	-inf	0.01	10.62	0	yes	TRINITY_DN20517_c0_g2	proline dehydrogenase [Medicago sativa]	GO:0004657(proline dehydrogenase activity);GO:0005739(mitochondrion);GO:0006537(glutamate biosynthetic process);GO:0006562(proline catabolic process);GO:0006979(response to oxidative stress);GO:0009414(response to water deprivation);GO:0010133(proline catabolic process to glutamate);GO:0042742(defense response to bacterium);GO:0055114(oxidation-reduction process);GO:0071949(FAD binding)	ko00330(Arginine and proline metabolism)	98.75	13.99	3.02	up	0	yes
mtr-miR156b-5p	up	0.87	0.03	1130.89	2060.61	yes	TRINITY_DN14695_c0_g5	purine permease 3 [Medicago truncatula]	GO:0005345(purine nucleobase transmembrane transporter activity);GO:0005515(protein binding);GO:0005887(integral component of plasma membrane);GO:0006863(purine nucleobase transport);GO:0009507(chloroplast);GO:0010184(cytokinin transport);GO:0015211(purine nucleoside transmembrane transporter activity);GO:0016021(integral component of membrane)	ko00010(Glycolysis / Gluconeogenesis);ko00030(Pentose phosphate pathway);ko00051(Fructose and mannose metabolism);ko00052(Galactose metabolism);ko03018(RNA degradation)	27.59	6.74	2.16	up	0	yes
mtr-miR156b-5p	up	0.87	0.03	1130.89	2060.61	yes	TRINITY_DN16441_c0_g2	uncharacterized protein LOC11405634 [Medicago truncatula]	GO:0003674(molecular_function);GO:0008150(biological_process);GO:0009507(chloroplast)	-	86.09	28.11	1.63	up	0.02	yes
mtr-miR156b-5p	up	0.87	0.03	1130.89	2060.61	yes	TRINITY_DN23829_c0_g2	cytochrome P450 78A3 [Medicago truncatula]	GO:0016020(membrane);GO:0016709(oxidoreductase activity, acting on paired donors, with incorporation or reduction of molecular oxygen, NAD(P)H as one donor, and incorporation of one atom of oxygen);GO:0044550(secondary metabolite biosynthetic process)	-	62.6	140.42	-1.02	down	0.05	yes
mtr-miR156b-5p	up	0.87	0.03	1130.89	2060.61	yes	TRINITY_DN25759_c1_g1	3-oxo-Delta(4,5)-steroid 5-beta-reductase [Medicago truncatula]	GO:0005829(cytosol);GO:0008202(steroid metabolic process);GO:0009611(response to wounding);GO:0010051(xylem and phloem pattern formation);GO:0035671(enone reductase activity);GO:0047787(delta4-3-oxosteroid 5beta-reductase activity);GO:0055114(oxidation-reduction process)	ko00040(Pentose and glucuronate interconversions)	214.22	64.54	2.28	up	0	yes
mtr-miR168b	up	0.73	0.01	3059.52	5061.97	yes	TRINITY_DN13210_c0_g1	uncharacterized protein LOC112417093 [Medicago truncatula]	-	-	157.69	19.17	3.2	up	0	yes
mtr-miR168b	up	0.73	0.01	3059.52	5061.97	yes	TRINITY_DN14068_c1_g1	transcription factor MYB44 [Medicago truncatula]	GO:0000981(RNA polymerase II transcription factor activity, sequence-specific DNA binding);GO:0001135(transcription factor activity, RNA polymerase II transcription factor recruiting);GO:0003677(DNA binding);GO:0003700(DNA binding transcription factor activity);GO:0005515(protein binding);GO:0005634(nucleus);GO:0006351(transcription, DNA-templated);GO:0006355(regulation of transcription, DNA-temp…	-	109.72	47.51	1.39	up	0	yes
mtr-miR168b	up	0.73	0.01	3059.52	5061.97	yes	TRINITY_DN17284_c0_g2	probable pectinesterase/pectinesterase inhibitor 34 [Medicago truncatula]	GO:0030599(pectinesterase activity);GO:0046910(pectinesterase inhibitor activity);GO:0071944(cell periphery)	ko00040(Pentose and glucuronate interconversions)	2.3	9.76	-1.89	down	0.04	yes
mtr-miR172b	down	-0.58	0.02	243.73	162.99	yes	TRINITY_DN14261_c0_g1	transcription factor bHLH35 isoform X1 [Medicago truncatula]	GO:0003677(DNA binding);GO:0003700(DNA binding transcription factor activity);GO:0005634(nucleus);GO:0006351(transcription, DNA-templated);GO:0006355(regulation of transcription, DNA-templated);GO:0046983(protein dimerization activity)	-	84.73	9.24	3.4	up	0	yes
mtr-miR172b	down	-0.58	0.02	243.73	162.99	yes	TRINITY_DN14583_c0_g1	probable UDP-arabinopyranose mutase 1 [Medicago truncatula]	GO:0005794(Golgi apparatus);GO:0005829(cytosol);GO:0009832(plant-type cell wall biogenesis);GO:0033356(UDP-L-arabinose metabolic process);GO:0052691(UDP-arabinopyranose mutase activity)	ko00520(Amino sugar and nucleotide sugar metabolism)	110.78	48.34	1.3	up	0	yes
mtr-miR172b	down	-0.58	0.02	243.73	162.99	yes	TRINITY_DN16588_c0_g2	ethylene-responsive transcription factor RAP2-7 isoform X1 [Medicago truncatula]	GO:0003677(DNA binding);GO:0003700(DNA binding transcription factor activity);GO:0005634(nucleus);GO:0006351(transcription, DNA-templated);GO:0006355(regulation of transcription, DNA-templated);GO:0009908(flower development);GO:0010073(meristem maintenance);GO:0010093(specification of floral organ identity);GO:0019953(sexual reproduction);GO:0030154(cell differentiation);GO:0048316(seed developme…	-	34.36	7.57	2.15	up	0	yes
mtr-miR172b	down	-0.58	0.02	243.73	162.99	yes	TRINITY_DN17480_c0_g1	uncharacterized protein LOC25483626 [Medicago truncatula]	GO:0003674(molecular_function);GO:0005634(nucleus);GO:0008150(biological_process)	-	40.1	15.35	1.6	up	0	yes
mtr-miR172b	down	-0.58	0.02	243.73	162.99	yes	TRINITY_DN17500_c1_g1	UPF0481 protein At3g47200 [Medicago truncatula]	GO:0003674(molecular_function);GO:0005886(plasma membrane);GO:0008150(biological_process);GO:0016021(integral component of membrane)	-	14.49	52.78	-1.68	down	0	yes
mtr-miR172b	down	-0.58	0.02	243.73	162.99	yes	TRINITY_DN19871_c0_g1	-	-	-	12.24	3.4	2.07	up	0.01	yes
mtr-miR172b	down	-0.58	0.02	243.73	162.99	yes	TRINITY_DN20709_c0_g3	phototropic-responsive NPH3 family protein [Medicago truncatula]	GO:0005886(plasma membrane);GO:0009416(response to light stimulus);GO:0010087(phloem or xylem histogenesis);GO:0010305(leaf vascular tissue pattern formation);GO:0010588(cotyledon vascular tissue pattern formation);GO:0016567(protein ubiquitination);GO:0048367(shoot system development);GO:0080022(primary root development)	-	25.06	13.07	1.03	up	0.03	yes
mtr-miR172b	down	-0.58	0.02	243.73	162.99	yes	TRINITY_DN22322_c0_g1	ethylene-responsive transcription factor RAP2-7 isoform X2 [Medicago truncatula]	GO:0003677(DNA binding);GO:0003700(DNA binding transcription factor activity);GO:0005634(nucleus);GO:0006351(transcription, DNA-templated);GO:0006355(regulation of transcription, DNA-templated);GO:0009908(flower development);GO:0010073(meristem maintenance);GO:0010093(specification of floral organ identity);GO:0019953(sexual reproduction);GO:0030154(cell differentiation);GO:0048316(seed developme…	-	11.9	31.23	-1.57	down	0.04	yes
mtr-miR172b	down	-0.58	0.02	243.73	162.99	yes	TRINITY_DN22378_c1_g1	probable methyltransferase PMT21 isoform X2 [Medicago truncatula]	GO:0005768(endosome);GO:0005774(vacuolar membrane);GO:0005802(trans-Golgi network);GO:0008757(S-adenosylmethionine-dependent methyltransferase activity);GO:0032259(methylation)	-	48.16	21.19	1.27	up	0.01	yes

## Sheet: RW vs. CK
miR_name	regulation	log2(fold_change)	pvalue(t_test)	CK(mean)	RW(mean)	significant	Transcript	Transcript Annotation	GO	KEGG	FPKM.RW(mean)	FPKM.CK(mean)	log2fold_change	regulation	pvalue	significant
mtr-MIR2592bj-p3_2ss12TC19AT	up	2.25	0.02	152.48	723.27	yes	TRINITY_DN21202_c0_g2	uncharacterized protein LOC25489828 [Medicago truncatula]	GO:0003674(molecular_function);GO:0008150(biological_process)	-	3.21	27.73	-3.07	down	0	yes
mtr-MIR2592bj-p3_2ss12TC19AT	up	2.25	0.02	152.48	723.27	yes	TRINITY_DN23643_c0_g1	Y2K4 dehydrin variant G1, partial [Medicago sativa]	-	-	183.7	3.53	5.31	up	0.04	yes
mtr-MIR2603-p3_2ss9AC17AC	up	2.06	0.01	9.43	39.39	yes	TRINITY_DN14766_c1_g1	early light-induced protein, chloroplastic [Medicago truncatula]	GO:0009409(response to cold);GO:0009507(chloroplast);GO:0009522(photosystem I);GO:0009523(photosystem II);GO:0009535(chloroplast thylakoid membrane);GO:0010030(positive regulation of seed germination);GO:0010117(photoprotection);GO:0010380(regulation of chlorophyll biosynthetic process);GO:0015979(photosynthesis);GO:0016021(integral component of membrane);GO:0016168(chlorophyll binding);GO:003460…	-	226.63	8.89	3.95	up	0	yes
mtr-MIR2603-p3_2ss9AC17AC	up	2.06	0.01	9.43	39.39	yes	TRINITY_DN22815_c0_g1	lanC-like protein GCL1 [Medicago truncatula]	GO:0003824(catalytic activity);GO:0005737(cytoplasm);GO:0005886(plasma membrane);GO:0007165(signal transduction);GO:0019898(extrinsic component of membrane)	-	22.25	63.97	-1.26	down	0.04	yes
mtr-miR396a-5p	down	-0.42	0.04	95428.1	71337.4	yes	TRINITY_DN23804_c0_g2	heat shock protein 83 [Medicago truncatula]	GO:0005515(protein binding);GO:0005524(ATP binding);GO:0005730(nucleolus);GO:0005737(cytoplasm);GO:0005794(Golgi apparatus);GO:0005829(cytosol);GO:0005886(plasma membrane);GO:0006457(protein folding);GO:0009408(response to heat);GO:0016020(membrane);GO:0045087(innate immune response);GO:0051082(unfolded protein binding);GO:0051131(chaperone-mediated protein complex assembly);GO:0071277(cellular r…	ko04141(Protein processing in endoplasmic reticulum);ko04626(Plant-pathogen interaction)	14.03	2.88	1.82	up	0.01	yes
mtr-miR396a-5p	down	-0.42	0.04	95428.1	71337.4	yes	TRINITY_DN24497_c0_g1	diacylglycerol O-acyltransferase 3, cytosolic [Medicago truncatula]	GO:0003954(NADH dehydrogenase activity);GO:0009060(aerobic respiration);GO:0010181(FMN binding);GO:0051287(NAD binding);GO:0051539(4 iron, 4 sulfur cluster binding)	-	25.19	67.98	-1.35	down	0.01	yes
