# Supplementary material for: Utilization of Transcriptome, Small RNA, and Degradome Sequencing to Provide Insights Into Drought Stress and Rewatering Treatment in Medicago ruthenica
Source: Front Plant Sci. 2021 Aug 3;12:675903. doi: 10.3389/fpls.2021.675903 (PMC8369265; doi:10.3389/fpls.2021.675903)
Supplement: Supplementary file 12 [file Table_12.XLSX]

## Sheet: GO  enrichment
GO_ID	GO_Term	GO_function	GO_class	Genes	S gene number	TS gene number
GO:0046914	transition metal ion binding	molecular_function	7	TRINITY_DN13312_c0_g5;TRINITY_DN22632_c1_g1;TRINITY_DN13783_c0_g6;TRINITY_DN13312_c0_g1;TRINITY_DN21120_c0_g1;TRINITY_DN13312_c0_g3	6	78
GO:0046916	cellular transition metal ion homeostasis	biological_process	11	TRINITY_DN21120_c0_g1;TRINITY_DN13783_c0_g6;TRINITY_DN22632_c1_g1;TRINITY_DN13312_c0_g1;TRINITY_DN13312_c0_g5;TRINITY_DN13312_c0_g3	6	78
GO:0030001	metal ion transport	biological_process	8	TRINITY_DN13783_c0_g6;TRINITY_DN13312_c0_g5;TRINITY_DN21120_c0_g1;TRINITY_DN13312_c0_g3;TRINITY_DN13312_c0_g1;TRINITY_DN22632_c1_g1	6	78
GO:0006334	nucleosome assembly	biological_process	7	TRINITY_DN13646_c0_g2;TRINITY_DN18132_c0_g1;TRINITY_DN20933_c1_g1;TRINITY_DN22108_c0_g1	4	78
GO:0005652	nuclear lamina	cellular_component	6	TRINITY_DN26260_c0_g2;TRINITY_DN25289_c0_g1	2	78
GO:0000788	nuclear nucleosome	cellular_component	6	TRINITY_DN22108_c0_g1;TRINITY_DN13646_c0_g2	2	78
GO:0006997	nucleus organization	biological_process	6	TRINITY_DN25289_c0_g1;TRINITY_DN26260_c0_g2	2	78
GO:0003755	peptidyl-prolyl cis-trans isomerase activity	molecular_function	6	TRINITY_DN15434_c0_g2;TRINITY_DN17047_c1_g1;TRINITY_DN21420_c0_g1;TRINITY_DN23001_c0_g2	4	78
GO:0034399	nuclear periphery	cellular_component	6	TRINITY_DN25289_c0_g1;TRINITY_DN26260_c0_g2	2	78
GO:0009537	proplastid	cellular_component	7	TRINITY_DN20610_c0_g4	1	78
GO:0043620	regulation of DNA-templated transcription in response to stress	biological_process	9	TRINITY_DN22936_c0_g4	1	78
GO:0010055	atrichoblast differentiation	biological_process	8	TRINITY_DN22936_c0_g4	1	78
GO:0004869	cysteine-type endopeptidase inhibitor activity	molecular_function	8	TRINITY_DN21409_c0_g2	1	78
GO:1900088	regulation of inositol biosynthetic process	biological_process	9	TRINITY_DN16980_c1_g3	1	78
GO:0031932	TORC2 complex	cellular_component	4	TRINITY_DN16980_c1_g3	1	78
GO:0032107	regulation of response to nutrient levels	biological_process	8	TRINITY_DN22936_c0_g4	1	78
GO:0032008	positive regulation of TOR signaling	biological_process	10	TRINITY_DN16980_c1_g3	1	78
GO:0010540	basipetal auxin transport	biological_process	9	TRINITY_DN20559_c1_g2	1	78
GO:0034724	DNA replication-independent nucleosome organization	biological_process	7	TRINITY_DN24938_c0_g1	1	78
GO:0032956	regulation of actin cytoskeleton organization	biological_process	7	TRINITY_DN16980_c1_g3	1	78
GO:0018023	peptidyl-lysine trimethylation	biological_process	12	TRINITY_DN24621_c0_g1	1	78
GO:0031931	TORC1 complex	cellular_component	4	TRINITY_DN16980_c1_g3	1	78
GO:0009513	etioplast	cellular_component	7	TRINITY_DN20610_c0_g4	1	78
GO:1900091	regulation of raffinose biosynthetic process	biological_process	9	TRINITY_DN16980_c1_g3	1	78
GO:0031929	TOR signaling	biological_process	6	TRINITY_DN16980_c1_g3	1	78
GO:0009739	response to gibberellin	biological_process	6	TRINITY_DN21884_c0_g2;TRINITY_DN21884_c0_g1	2	78
GO:0071004	U2-type prespliceosome	cellular_component	8	TRINITY_DN18240_c0_g1;TRINITY_DN23614_c0_g1	2	78
GO:0005685	U1 snRNP	cellular_component	8	TRINITY_DN18240_c0_g1;TRINITY_DN23614_c0_g1	2	78
GO:0000398	mRNA splicing, via spliceosome	biological_process	13	TRINITY_DN23614_c0_g1;TRINITY_DN18240_c0_g1;TRINITY_DN25994_c1_g2	3	78
GO:0005528	FK506 binding	molecular_function	6	TRINITY_DN15434_c0_g2;TRINITY_DN21420_c0_g1	2	78
GO:0035101	FACT complex	cellular_component	5	TRINITY_DN24938_c0_g1	1	78
GO:0006972	hyperosmotic response	biological_process	6	TRINITY_DN21409_c0_g2	1	78
GO:0033186	CAF-1 complex	cellular_component	4	TRINITY_DN20933_c1_g1	1	78
GO:0097298	regulation of nucleus size	biological_process	6	TRINITY_DN25289_c0_g1	1	78
GO:0017108	5'-flap endonuclease activity	molecular_function	10	TRINITY_DN14304_c1_g2	1	78
GO:0045604	regulation of epidermal cell differentiation	biological_process	8	TRINITY_DN16038_c0_g3	1	78
GO:2000117	negative regulation of cysteine-type endopeptidase activity	biological_process	12	TRINITY_DN21409_c0_g2	1	78
GO:0031648	protein destabilization	biological_process	6	TRINITY_DN25150_c0_g3	1	78
GO:0010369	chromocenter	cellular_component	7	TRINITY_DN25289_c0_g1	1	78
GO:0048571	long-day photoperiodism	biological_process	8	TRINITY_DN16980_c1_g3	1	78
GO:0008356	asymmetric cell division	biological_process	5	TRINITY_DN16038_c0_g3	1	78
GO:0000386	second spliceosomal transesterification activity	molecular_function	5	TRINITY_DN24349_c0_g1	1	78
GO:0000154	rRNA modification	biological_process	12	TRINITY_DN25034_c1_g1	1	78
GO:0018026	peptidyl-lysine monomethylation	biological_process	12	TRINITY_DN24621_c0_g1	1	78
GO:0009509	chromoplast	cellular_component	7	TRINITY_DN20610_c0_g4	1	78
GO:0005960	glycine cleavage complex	cellular_component	6	TRINITY_DN23054_c2_g2	1	78
GO:0044212	transcription regulatory region DNA binding	molecular_function	7	TRINITY_DN22936_c0_g4;TRINITY_DN17108_c3_g1;TRINITY_DN25328_c1_g1	3	78
GO:0009742	brassinosteroid mediated signaling pathway	biological_process	7	TRINITY_DN22714_c0_g4;TRINITY_DN21052_c0_g2	2	78
GO:0061077	chaperone-mediated protein folding	biological_process	5	TRINITY_DN21420_c0_g1;TRINITY_DN15434_c0_g2	2	78
GO:0005719	nuclear euchromatin	cellular_component	8	TRINITY_DN24938_c0_g1	1	78
GO:0006529	asparagine biosynthetic process	biological_process	12	TRINITY_DN25292_c1_g2	1	78
GO:0002020	protease binding	molecular_function	6	TRINITY_DN21409_c0_g2	1	78
GO:0010152	pollen maturation	biological_process	5	TRINITY_DN21052_c0_g2	1	78
GO:0070413	trehalose metabolism in response to stress	biological_process	9	TRINITY_DN19093_c1_g3	1	78
GO:0016279	protein-lysine N-methyltransferase activity	molecular_function	8	TRINITY_DN24621_c0_g1	1	78
GO:0000978	RNA polymerase II proximal promoter sequence-specific DNA binding	molecular_function	10	TRINITY_DN22936_c0_g4	1	78
GO:0003825	alpha,alpha-trehalose-phosphate synthase (UDP-forming) activity	molecular_function	8	TRINITY_DN19093_c1_g3	1	78
GO:0005669	transcription factor TFIID complex	cellular_component	7	TRINITY_DN26094_c0_g1	1	78
GO:0005992	trehalose biosynthetic process	biological_process	9	TRINITY_DN19093_c1_g3	1	78
GO:0031428	box C/D snoRNP complex	cellular_component	6	TRINITY_DN25034_c1_g1	1	78
GO:0004805	trehalose-phosphatase activity	molecular_function	9	TRINITY_DN19093_c1_g3	1	78
GO:0004066	asparagine synthase (glutamine-hydrolyzing) activity	molecular_function	7	TRINITY_DN25292_c1_g2	1	78
GO:0006913	nucleocytoplasmic transport	biological_process	8	TRINITY_DN23194_c0_g1	1	78
GO:0018107	peptidyl-threonine phosphorylation	biological_process	10	TRINITY_DN20559_c1_g2	1	78
GO:0060261	positive regulation of transcription initiation from RNA polymerase II promoter	biological_process	11	TRINITY_DN22642_c0_g4	1	78
GO:0004012	ATPase-coupled phospholipid transporter activity	molecular_function	6	TRINITY_DN25182_c0_g1	1	78
GO:0051302	regulation of cell division	biological_process	6	TRINITY_DN16038_c0_g3	1	78
GO:0006541	glutamine metabolic process	biological_process	11	TRINITY_DN25292_c1_g2	1	78
GO:0009414	response to water deprivation	biological_process	5	TRINITY_DN25297_c1_g2;TRINITY_DN20559_c1_g2;TRINITY_DN21409_c0_g2	3	78
GO:0006281	DNA repair	biological_process	8	TRINITY_DN24938_c0_g1;TRINITY_DN14304_c1_g2	2	78
GO:0010290	chlorophyll catabolite transmembrane transporter activity	molecular_function	5	TRINITY_DN19147_c0_g1	1	78
GO:0004864	protein phosphatase inhibitor activity	molecular_function	7	TRINITY_DN20860_c0_g1	1	78
GO:0080163	regulation of protein serine/threonine phosphatase activity	biological_process	12	TRINITY_DN20860_c0_g1	1	78
GO:0015431	glutathione S-conjugate-exporting ATPase activity	molecular_function	10	TRINITY_DN19147_c0_g1	1	78
GO:0010431	seed maturation	biological_process	5	TRINITY_DN25297_c1_g2	1	78
GO:0009501	amyloplast	cellular_component	7	TRINITY_DN20610_c0_g4	1	78
GO:0030515	snoRNA binding	molecular_function	7	TRINITY_DN25034_c1_g1	1	78
GO:0010501	RNA secondary structure unwinding	biological_process	9	TRINITY_DN21150_c0_g2;TRINITY_DN25994_c1_g2	2	78
GO:0031491	nucleosome binding	molecular_function	5	TRINITY_DN24938_c0_g1	1	78
GO:0008483	transaminase activity	molecular_function	6	TRINITY_DN25289_c0_g1	1	78
GO:0010075	regulation of meristem growth	biological_process	7	TRINITY_DN16038_c0_g3	1	78
GO:0000786	nucleosome	cellular_component	5	TRINITY_DN18132_c0_g1	1	78
GO:0010427	abscisic acid binding	molecular_function	6	TRINITY_DN20860_c0_g1	1	78
GO:0033612	receptor serine/threonine kinase binding	molecular_function	6	TRINITY_DN21052_c0_g2	1	78
GO:0009640	photomorphogenesis	biological_process	8	TRINITY_DN25150_c0_g3	1	78
GO:0032968	positive regulation of transcription elongation from RNA polymerase II promoter	biological_process	11	TRINITY_DN24938_c0_g1	1	78
GO:0004518	nuclease activity	molecular_function	6	TRINITY_DN14304_c1_g2	1	78
GO:0000463	maturation of LSU-rRNA from tricistronic rRNA transcript (SSU-rRNA, 5.8S rRNA, LSU-rRNA)	biological_process	13	TRINITY_DN18599_c0_g1	1	78
GO:0048278	vesicle docking	biological_process	6	TRINITY_DN12599_c1_g1	1	78
GO:0005622	intracellular	cellular_component	4	TRINITY_DN20559_c1_g2;TRINITY_DN24365_c0_g1;TRINITY_DN14304_c1_g2	3	78
GO:0010228	vegetative to reproductive phase transition of meristem	biological_process	5	TRINITY_DN24938_c0_g1;TRINITY_DN23708_c0_g1	2	78
GO:0004402	histone acetyltransferase activity	molecular_function	11	TRINITY_DN26094_c0_g1	1	78
GO:0010154	fruit development	biological_process	6	TRINITY_DN25297_c1_g2	1	78
GO:0031966	mitochondrial membrane	cellular_component	5	TRINITY_DN25297_c1_g2	1	78
GO:0071482	cellular response to light stimulus	biological_process	7	TRINITY_DN20610_c0_g4	1	78
GO:0005655	nucleolar ribonuclease P complex	cellular_component	9	TRINITY_DN24027_c0_g1	1	78
GO:0005788	endoplasmic reticulum lumen	cellular_component	7	TRINITY_DN21152_c0_g1	1	78
GO:0048527	lateral root development	biological_process	8	TRINITY_DN22936_c0_g4	1	78
GO:0005388	ATPase-coupled calcium transmembrane transporter activity	molecular_function	10	TRINITY_DN16922_c0_g1	1	78
GO:0017025	TBP-class protein binding	molecular_function	7	TRINITY_DN26094_c0_g1	1	78
GO:0006906	vesicle fusion	biological_process	7	TRINITY_DN12599_c1_g1	1	78
GO:0004185	serine-type carboxypeptidase activity	molecular_function	9	TRINITY_DN22714_c0_g4	1	78
GO:0009294	DNA mediated transformation	biological_process	6	TRINITY_DN26094_c0_g1	1	78
GO:0006368	transcription elongation from RNA polymerase II promoter	biological_process	9	TRINITY_DN24938_c0_g1	1	78
GO:0016671	oxidoreductase activity, acting on a sulfur group of donors, disulfide as acceptor	molecular_function	6	TRINITY_DN17495_c0_g1	1	78
GO:0004004	ATP-dependent RNA helicase activity	molecular_function	11	TRINITY_DN21150_c0_g2;TRINITY_DN25994_c1_g2	2	78
GO:0004526	ribonuclease P activity	molecular_function	9	TRINITY_DN24027_c0_g1	1	78
GO:0000103	sulfate assimilation	biological_process	6	TRINITY_DN17495_c0_g1	1	78
GO:0042803	protein homodimerization activity	molecular_function	6	TRINITY_DN16038_c0_g3;TRINITY_DN25292_c1_g2	2	78
GO:0000122	negative regulation of transcription by RNA polymerase II	biological_process	10	TRINITY_DN22936_c0_g4	1	78
GO:0009556	microsporogenesis	biological_process	7	TRINITY_DN21052_c0_g2	1	78
GO:0090502	RNA phosphodiester bond hydrolysis, endonucleolytic	biological_process	10	TRINITY_DN24027_c0_g1	1	78
GO:0006260	DNA replication	biological_process	8	TRINITY_DN24938_c0_g1	1	78
GO:0004693	cyclin-dependent protein serine/threonine kinase activity	molecular_function	9	TRINITY_DN22626_c0_g2	1	78
GO:0005667	transcription factor complex	cellular_component	4	TRINITY_DN22642_c0_g4	1	78
GO:0005484	SNAP receptor activity	molecular_function	5	TRINITY_DN12599_c1_g1	1	78
GO:0001135	RNA polymerase II transcription regulator recruiting activity	molecular_function	7	TRINITY_DN25328_c1_g1	1	78
GO:0000149	SNARE binding	molecular_function	5	TRINITY_DN12599_c1_g1	1	78
GO:0031201	SNARE complex	cellular_component	6	TRINITY_DN12599_c1_g1	1	78
GO:0051213	dioxygenase activity	molecular_function	5	TRINITY_DN18769_c0_g4	1	78
GO:0000981	DNA-binding transcription factor activity, RNA polymerase II-specific	molecular_function	5	TRINITY_DN25328_c1_g1	1	78
GO:0031965	nuclear membrane	cellular_component	5	TRINITY_DN25289_c0_g1	1	78
GO:0003713	transcription coactivator activity	molecular_function	5	TRINITY_DN22642_c0_g4	1	78
GO:0042538	hyperosmotic salinity response	biological_process	7	TRINITY_DN20559_c1_g2	1	78
GO:0050897	cobalt ion binding	molecular_function	8	TRINITY_DN21409_c0_g2	1	78
GO:0003676	nucleic acid binding	molecular_function	5	TRINITY_DN20612_c0_g1;TRINITY_DN22138_c0_g2;TRINITY_DN16038_c0_g3	3	78
GO:0005773	vacuole	cellular_component	6	TRINITY_DN22714_c0_g4;TRINITY_DN25860_c0_g1;TRINITY_DN19147_c0_g1	3	78
GO:0034599	cellular response to oxidative stress	biological_process	6	TRINITY_DN17495_c0_g1	1	78
GO:0016791	phosphatase activity	molecular_function	7	TRINITY_DN19093_c1_g3	1	78
GO:0003924	GTPase activity	molecular_function	9	TRINITY_DN24365_c0_g1;TRINITY_DN23194_c0_g1	2	78
GO:0009615	response to virus	biological_process	7	TRINITY_DN23194_c0_g1	1	78
GO:0002181	cytoplasmic translation	biological_process	9	TRINITY_DN18599_c0_g1	1	78
GO:0042393	histone binding	molecular_function	5	TRINITY_DN24938_c0_g1	1	78
GO:0015035	protein disulfide oxidoreductase activity	molecular_function	7	TRINITY_DN17495_c0_g1	1	78
GO:0008559	ATPase-coupled xenobiotic transmembrane transporter activity	molecular_function	9	TRINITY_DN19147_c0_g1	1	78
GO:0051603	proteolysis involved in cellular protein catabolic process	biological_process	8	TRINITY_DN22714_c0_g4	1	78
GO:0080008	Cul4-RING E3 ubiquitin ligase complex	cellular_component	7	TRINITY_DN16980_c1_g3	1	78
GO:0000462	maturation of SSU-rRNA from tricistronic rRNA transcript (SSU-rRNA, 5.8S rRNA, LSU-rRNA)	biological_process	13	TRINITY_DN18027_c0_g3	1	78
GO:0035091	phosphatidylinositol binding	molecular_function	6	TRINITY_DN25150_c0_g3	1	78
GO:0032040	small-subunit processome	cellular_component	6	TRINITY_DN25034_c1_g1	1	78
GO:0009965	leaf morphogenesis	biological_process	6	TRINITY_DN20610_c0_g4	1	78
GO:0004386	helicase activity	molecular_function	9	TRINITY_DN18513_c1_g5	1	78
GO:0046658	anchored component of plasma membrane	cellular_component	6	TRINITY_DN24694_c1_g2	1	78
GO:0016607	nuclear speck	cellular_component	8	TRINITY_DN25150_c0_g3	1	78
GO:0045944	positive regulation of transcription by RNA polymerase II	biological_process	10	TRINITY_DN26094_c0_g1	1	78
GO:0003779	actin binding	molecular_function	6	TRINITY_DN25860_c0_g1	1	78
GO:0003677	DNA binding	molecular_function	6	TRINITY_DN22642_c0_g4;TRINITY_DN22108_c0_g1;TRINITY_DN25328_c1_g1;TRINITY_DN18132_c0_g1;TRINITY_DN16038_c0_g3;TRINITY_DN26094_c0_g1;TRINITY_DN13646_c0_g2	7	78
GO:0005096	GTPase activator activity	molecular_function	6	TRINITY_DN23194_c0_g1	1	78
GO:0008289	lipid binding	molecular_function	4	TRINITY_DN21052_c0_g2	1	78
GO:0010468	regulation of gene expression	biological_process	7	TRINITY_DN25994_c1_g2	1	78
GO:0009751	response to salicylic acid	biological_process	6	TRINITY_DN25328_c1_g1	1	78
GO:0005524	ATP binding	molecular_function	5	TRINITY_DN25297_c1_g2;TRINITY_DN16662_c0_g5;TRINITY_DN18513_c1_g5;TRINITY_DN20559_c1_g2;TRINITY_DN21052_c0_g2;TRINITY_DN22626_c0_g2;TRINITY_DN19147_c0_g1;TRINITY_DN24694_c1_g2	8	78
GO:0005783	endoplasmic reticulum	cellular_component	6	TRINITY_DN25297_c1_g2;TRINITY_DN20559_c1_g2;TRINITY_DN21409_c0_g2	3	78
GO:0005654	nucleoplasm	cellular_component	6	TRINITY_DN25289_c0_g1	1	78
GO:0009409	response to cold	biological_process	5	TRINITY_DN21409_c0_g2;TRINITY_DN25297_c1_g2	2	78
GO:0006952	defense response	biological_process	5	TRINITY_DN18118_c0_g1;TRINITY_DN21409_c0_g2;TRINITY_DN16662_c0_g5	3	78
GO:0022627	cytosolic small ribosomal subunit	cellular_component	8	TRINITY_DN18027_c0_g3	1	78
GO:0004675	transmembrane receptor protein serine/threonine kinase activity	molecular_function	9	TRINITY_DN21052_c0_g2	1	78
GO:0048364	root development	biological_process	6	TRINITY_DN16038_c0_g3	1	78
GO:0000325	plant-type vacuole	cellular_component	7	TRINITY_DN19147_c0_g1	1	78
GO:0009506	plasmodesma	cellular_component	5	TRINITY_DN19147_c0_g1;TRINITY_DN18513_c1_g5;TRINITY_DN18118_c0_g1;TRINITY_DN23262_c0_g1	4	78
GO:0009451	RNA modification	biological_process	9	TRINITY_DN22716_c0_g1	1	78
GO:0007166	cell surface receptor signaling pathway	biological_process	5	TRINITY_DN21052_c0_g2	1	78
GO:0045454	cell redox homeostasis	biological_process	5	TRINITY_DN17495_c0_g1	1	78
GO:0005681	spliceosomal complex	cellular_component	6	TRINITY_DN24349_c0_g1	1	78
GO:0018105	peptidyl-serine phosphorylation	biological_process	10	TRINITY_DN20559_c1_g2	1	78
GO:0006357	regulation of transcription by RNA polymerase II	biological_process	9	TRINITY_DN25328_c1_g1	1	78
GO:0005789	endoplasmic reticulum membrane	cellular_component	5	TRINITY_DN15434_c0_g2;TRINITY_DN21420_c0_g1	2	78
GO:0012505	endomembrane system	cellular_component	4	TRINITY_DN12599_c1_g1	1	78
GO:0006355	regulation of transcription, DNA-templated	biological_process	8	TRINITY_DN16038_c0_g3;TRINITY_DN17396_c0_g1;TRINITY_DN17108_c3_g1;TRINITY_DN25328_c1_g1;TRINITY_DN23708_c0_g1;TRINITY_DN22642_c0_g4;TRINITY_DN22936_c0_g4	7	78
GO:0003735	structural constituent of ribosome	molecular_function	4	TRINITY_DN18599_c0_g1;TRINITY_DN18027_c0_g3	2	78
GO:0006886	intracellular protein transport	biological_process	10	TRINITY_DN12599_c1_g1	1	78
GO:0009651	response to salt stress	biological_process	6	TRINITY_DN25297_c1_g2;TRINITY_DN20559_c1_g2	2	78
GO:0016301	kinase activity	molecular_function	6	TRINITY_DN20559_c1_g2;TRINITY_DN21052_c0_g2;TRINITY_DN22626_c0_g2	3	78
GO:0005730	nucleolus	cellular_component	6	TRINITY_DN24938_c0_g1;TRINITY_DN23262_c0_g1	2	78
GO:0042626	ATPase-coupled transmembrane transporter activity	molecular_function	8	TRINITY_DN19147_c0_g1	1	78
GO:0005525	GTP binding	molecular_function	8	TRINITY_DN23194_c0_g1	1	78
GO:0050832	defense response to fungus	biological_process	8	TRINITY_DN21012_c0_g1	1	78
GO:0022625	cytosolic large ribosomal subunit	cellular_component	8	TRINITY_DN18599_c0_g1	1	78
GO:0016887	ATPase activity	molecular_function	9	TRINITY_DN25297_c1_g2	1	78
GO:0000166	nucleotide binding	molecular_function	5	TRINITY_DN16980_c1_g3	1	78
GO:0005774	vacuolar membrane	cellular_component	7	TRINITY_DN19147_c0_g1;TRINITY_DN25860_c0_g1	2	78
GO:0043231	intracellular membrane-bounded organelle	cellular_component	5	TRINITY_DN16922_c0_g1;TRINITY_DN21588_c0_g2	2	78
GO:0009658	chloroplast organization	biological_process	7	TRINITY_DN20610_c0_g4	1	78
GO:0005515	protein binding	molecular_function	4	TRINITY_DN16038_c0_g3;TRINITY_DN22642_c0_g4;TRINITY_DN21052_c0_g2;TRINITY_DN20559_c1_g2;TRINITY_DN21012_c0_g1;TRINITY_DN22626_c0_g2;TRINITY_DN16980_c1_g3;TRINITY_DN23708_c0_g1;TRINITY_DN25289_c0_g1;TRINITY_DN21409_c0_g2;TRINITY_DN16662_c0_g5	11	78
GO:0006979	response to oxidative stress	biological_process	5	TRINITY_DN21409_c0_g2	1	78
GO:0005737	cytoplasm	cellular_component	5	TRINITY_DN13312_c0_g3;TRINITY_DN25289_c0_g1;TRINITY_DN20860_c0_g1;TRINITY_DN13312_c0_g5;TRINITY_DN24694_c1_g2;TRINITY_DN13783_c0_g6;TRINITY_DN21120_c0_g1;TRINITY_DN13312_c0_g1;TRINITY_DN16980_c1_g3;TRINITY_DN20612_c0_g1;TRINITY_DN21012_c0_g1;TRINITY_DN22632_c1_g1;TRINITY_DN23194_c0_g1	13	78
GO:0035556	intracellular signal transduction	biological_process	5	TRINITY_DN20559_c1_g2	1	78
GO:0003700	DNA-binding transcription factor activity	molecular_function	4	TRINITY_DN16038_c0_g3;TRINITY_DN22936_c0_g4;TRINITY_DN17396_c0_g1;TRINITY_DN23708_c0_g1;TRINITY_DN25328_c1_g1	5	78
GO:0030154	cell differentiation	biological_process	5	TRINITY_DN25328_c1_g1	1	78
GO:0005516	calmodulin binding	molecular_function	5	TRINITY_DN18401_c0_g2	1	78
GO:0009408	response to heat	biological_process	5	TRINITY_DN26057_c1_g1	1	78
GO:0007275	multicellular organism development	biological_process	4	TRINITY_DN20559_c1_g2	1	78
GO:0006397	mRNA processing	biological_process	10	TRINITY_DN22138_c0_g2	1	78
GO:0005829	cytosol	cellular_component	6	TRINITY_DN24938_c0_g1;TRINITY_DN19093_c1_g3;TRINITY_DN26260_c0_g2;TRINITY_DN25292_c1_g2;TRINITY_DN17495_c0_g1;TRINITY_DN24694_c1_g2;TRINITY_DN23194_c0_g1;TRINITY_DN20612_c0_g1;TRINITY_DN21409_c0_g2	9	78
GO:0055085	transmembrane transport	biological_process	6	TRINITY_DN19147_c0_g1	1	78
GO:0061630	ubiquitin protein ligase activity	molecular_function	7	TRINITY_DN25150_c0_g3	1	78
GO:0043531	ADP binding	molecular_function	9	TRINITY_DN16662_c0_g5	1	78
GO:0043565	sequence-specific DNA binding	molecular_function	7	TRINITY_DN26094_c0_g1;TRINITY_DN25328_c1_g1	2	78
GO:0080044	quercetin 7-O-glucosyltransferase activity	molecular_function	8	TRINITY_DN21588_c0_g2	1	78
GO:0080043	quercetin 3-O-glucosyltransferase activity	molecular_function	8	TRINITY_DN21588_c0_g2	1	78
GO:0005634	nucleus	cellular_component	6	TRINITY_DN23262_c0_g1;TRINITY_DN26260_c0_g2;TRINITY_DN25150_c0_g3;TRINITY_DN19093_c1_g3;TRINITY_DN20860_c0_g1;TRINITY_DN16038_c0_g3;TRINITY_DN26094_c0_g1;TRINITY_DN17108_c3_g1;TRINITY_DN24938_c0_g1;TRINITY_DN22642_c0_g4;TRINITY_DN18132_c0_g1;TRINITY_DN18513_c1_g5;TRINITY_DN25289_c0_g1;TRINITY_DN15422_c0_g1;TRINITY_DN18401_c0_g2;TRINITY_DN17396_c0_g1;TRINITY_DN22936_c0_g4;TRINITY_DN14304_c1_g2;TRI…	24	78
GO:0005887	integral component of plasma membrane	cellular_component	6	TRINITY_DN16922_c0_g1	1	78
GO:0009738	abscisic acid-activated signaling pathway	biological_process	6	TRINITY_DN20860_c0_g1	1	78
GO:0052696	flavonoid glucuronidation	biological_process	6	TRINITY_DN21588_c0_g2	1	78
GO:0005886	plasma membrane	cellular_component	4	TRINITY_DN25297_c1_g2;TRINITY_DN14865_c0_g1;TRINITY_DN19147_c0_g1;TRINITY_DN25182_c0_g1;TRINITY_DN22626_c0_g2;TRINITY_DN18401_c0_g2;TRINITY_DN20559_c1_g2;TRINITY_DN17495_c0_g1;TRINITY_DN18118_c0_g1;TRINITY_DN21052_c0_g2	10	78
GO:0009813	flavonoid biosynthetic process	biological_process	6	TRINITY_DN21588_c0_g2	1	78
GO:0008270	zinc ion binding	molecular_function	8	TRINITY_DN18513_c1_g5;TRINITY_DN16038_c0_g3	2	78
GO:0007165	signal transduction	biological_process	4	TRINITY_DN25150_c0_g3	1	78
GO:0048046	apoplast	cellular_component	4	TRINITY_DN19147_c0_g1	1	78
GO:0006457	protein folding	biological_process	4	TRINITY_DN17495_c0_g1	1	78
GO:0016567	protein ubiquitination	biological_process	11	TRINITY_DN25150_c0_g3	1	78
GO:0006412	translation	biological_process	8	TRINITY_DN24365_c0_g1	1	78
GO:0042742	defense response to bacterium	biological_process	8	TRINITY_DN21012_c0_g1	1	78
GO:0016757	transferase activity, transferring glycosyl groups	molecular_function	5	TRINITY_DN19093_c1_g3	1	78
GO:0006468	protein phosphorylation	biological_process	9	TRINITY_DN18118_c0_g1;TRINITY_DN21052_c0_g2	2	78
GO:0005768	endosome	cellular_component	7	TRINITY_DN16980_c1_g3	1	78
GO:0005618	cell wall	cellular_component	5	TRINITY_DN24694_c1_g2	1	78
GO:0004674	protein serine/threonine kinase activity	molecular_function	8	TRINITY_DN20559_c1_g2;TRINITY_DN18118_c0_g1	2	78
GO:0006351	transcription, DNA-templated	biological_process	8	TRINITY_DN16038_c0_g3;TRINITY_DN22936_c0_g4;TRINITY_DN22642_c0_g4;TRINITY_DN25328_c1_g1	4	78
GO:0009737	response to abscisic acid	biological_process	6	TRINITY_DN25297_c1_g2	1	78
GO:0005576	extracellular region	cellular_component	3	TRINITY_DN16662_c0_g5;TRINITY_DN21409_c0_g2	2	78
GO:0003723	RNA binding	molecular_function	6	TRINITY_DN18240_c0_g1;TRINITY_DN23614_c0_g1	2	78
GO:0046872	metal ion binding	molecular_function	6	TRINITY_DN25150_c0_g3;TRINITY_DN23194_c0_g1;TRINITY_DN16038_c0_g3	3	78
GO:0016021	integral component of membrane	cellular_component	5	TRINITY_DN21052_c0_g2;TRINITY_DN26057_c1_g1;TRINITY_DN14865_c0_g1;TRINITY_DN19147_c0_g1;TRINITY_DN12599_c1_g1;TRINITY_DN25297_c1_g2	6	78
GO:0016020	membrane	cellular_component	3	TRINITY_DN26057_c1_g1;TRINITY_DN16980_c1_g3	2	78
GO:0055114	oxidation-reduction process	biological_process	4	TRINITY_DN17495_c0_g1	1	78
GO:0009570	chloroplast stroma	cellular_component	8	TRINITY_DN24621_c0_g1	1	78
GO:0005739	mitochondrion	cellular_component	6	TRINITY_DN20134_c0_g2;TRINITY_DN25297_c1_g2	2	78
GO:0009507	chloroplast	cellular_component	7	TRINITY_DN19695_c0_g2;TRINITY_DN20610_c0_g4;TRINITY_DN25289_c0_g1;TRINITY_DN16298_c0_g1;TRINITY_DN22716_c0_g1	5	78

## Sheet: KEGG annotation
pathway_ID	pathway_name	Genes	S gene number	TS gene number
ko00290	Valine, leucine and isoleucine biosynthesis	TRINITY_DN26260_c0_g2;TRINITY_DN25289_c0_g1	2	30
ko00402	Benzoxazinoid biosynthesis	TRINITY_DN18769_c0_g4	1	30
ko00630	Glyoxylate and dicarboxylate metabolism	TRINITY_DN21884_c0_g1;TRINITY_DN23054_c2_g2;TRINITY_DN21884_c0_g2	3	30
ko00770	Pantothenate and CoA biosynthesis	TRINITY_DN25289_c0_g1;TRINITY_DN26260_c0_g2	2	30
ko00052	Galactose metabolism	TRINITY_DN21122_c0_g2;TRINITY_DN16038_c0_g3	2	30
ko00020	Citrate cycle (TCA cycle)	TRINITY_DN21884_c0_g2;TRINITY_DN21884_c0_g1	2	30
ko00280	Valine, leucine and isoleucine degradation	TRINITY_DN26260_c0_g2;TRINITY_DN25289_c0_g1	2	30
ko00604	Glycosphingolipid biosynthesis - ganglio series	TRINITY_DN16038_c0_g3	1	30
ko03040	Spliceosome	TRINITY_DN23614_c0_g1;TRINITY_DN24349_c0_g1;TRINITY_DN25994_c1_g2;TRINITY_DN18240_c0_g1	4	30
ko04130	SNARE interactions in vesicular transport	TRINITY_DN12599_c1_g1	1	30
ko00670	One carbon pool by folate	TRINITY_DN23054_c2_g2	1	30
ko00270	Cysteine and methionine metabolism	TRINITY_DN25289_c0_g1;TRINITY_DN26260_c0_g2	2	30
ko00531	Glycosaminoglycan degradation	TRINITY_DN16038_c0_g3	1	30
ko04933	AGE-RAGE signaling pathway in diabetic complications	TRINITY_DN17396_c0_g1	1	30
ko00511	Other glycan degradation	TRINITY_DN16038_c0_g3	1	30
ko04141	Protein processing in endoplasmic reticulum	TRINITY_DN21152_c0_g1;TRINITY_DN20612_c0_g1;TRINITY_DN26057_c1_g1	3	30
ko04136	Autophagy - other	TRINITY_DN16980_c1_g3	1	30
ko00600	Sphingolipid metabolism	TRINITY_DN16038_c0_g3	1	30
ko03022	Basal transcription factors	TRINITY_DN26094_c0_g1	1	30
ko03440	Homologous recombination	TRINITY_DN23262_c0_g1	1	30
ko00500	Starch and sucrose metabolism	TRINITY_DN21122_c0_g2;TRINITY_DN19093_c1_g3	2	30
ko00051	Fructose and mannose metabolism	TRINITY_DN13312_c0_g1	1	30
ko04016	MAPK signaling pathway - plant	TRINITY_DN22936_c0_g4;TRINITY_DN20860_c0_g1	2	30
ko00260	Glycine, serine and threonine metabolism	TRINITY_DN23054_c2_g2	1	30
ko00030	Pentose phosphate pathway	TRINITY_DN13312_c0_g1	1	30
ko00710	Carbon fixation in photosynthetic organisms	TRINITY_DN13312_c0_g1	1	30
ko04145	Phagosome	TRINITY_DN21152_c0_g1	1	30
ko03010	Ribosome	TRINITY_DN18027_c0_g3;TRINITY_DN18599_c0_g1	2	30
ko02010	ABC transporters	TRINITY_DN19147_c0_g1	1	30
ko04626	Plant-pathogen interaction	TRINITY_DN22936_c0_g4;TRINITY_DN21012_c0_g1	2	30
ko03008	Ribosome biogenesis in eukaryotes	TRINITY_DN25034_c1_g1	1	30
ko00010	Glycolysis / Gluconeogenesis	TRINITY_DN13312_c0_g1	1	30
ko04075	Plant hormone signal transduction	TRINITY_DN17108_c3_g1;TRINITY_DN20860_c0_g1	2	30
