# Supplementary material for: Utilization of Transcriptome, Small RNA, and Degradome Sequencing to Provide Insights Into Drought Stress and Rewatering Treatment in Medicago ruthenica
Source: Front Plant Sci. 2021 Aug 3;12:675903. doi: 10.3389/fpls.2021.675903 (PMC8369265; doi:10.3389/fpls.2021.675903)
Supplement: Supplementary file 13 [file Table_13.XLSX]

## Sheet: mRNA
Gene	Forward primer	Reverse primer
TRINITY_DN21990_c1_g1	GGTTTTGTTGAAGGTGGTAT	GCTGAGGAACCGGAGTAGAC
TRINITY_DN20306_c1_g5	GAGGAGCTGAAAGAGGCGTT	TAGTTTATTTGACCATCACC
TRINITY_DN16559_c0_g6	TCATCAACTATGTCTACCTC	TGTTGCAGACTGTGAAGAAG
TRINITY_DN19618_c0_g2	TGTTTTTGTTTGGGGACGAC	TTGATCTTCATGCTAACACG
TRINITY_DN24927_c0_g2	TTGTGGCCTTTTAAGGTTAC	AATCGTTGAAGTAAGCAGGG
TRINITY_DN22281_c0_g1	ATTGCTATGCTTCACCATTC	ACATCCATCCCTTGAATTAG
TRINITY_DN21723_c1_g3	ACCCCAAGCTTCTCTTCAAC	CTGGGTCATCAGCACATGTC
TRINITY_DN22246_c0_g1	CTCTCTTCAATTCCGAAAAC	GGCAGCTTCAGATTCAACAT
TRINITY_DN25755_c0_g1	CTATACCAACCCTTCCGACC	GGAGGTGAAAAGCCTTCTCG
TRINITY_DN25759_c1_g1	CTTCCAGAACGTAGCTTTAG	GTGAGGACGGAGAGTTTGGT
TRINITY_DN15929_c0_g2	GATCACCAGCCTCATCCG	GTCCAGCAGAAACAGTAACAAT
TRINITY_DN22423_c0_g2	CGCCTTCTCCTTGTTCTT	GCCTGGTAGGTCGTTTCC
TRINITY_DN20767_c0_g1	CCACCGATTCATCACTTT	ATCTCCCTCTGTCCTTCA
GAPDH	GTGGTGCCAAGAAGGTTGTTAT	CTGGGAATGATGTTGAAGGAAG

## Sheet: miRNA
miRNA	Sequence（5’--3’)
PC-3p-54_81480	CCGCGGGATCGGAGATTAGAGAAT
lja-miR390a-3p	CGCGCTATCCATCCTGAGTTTCA
lus-miR396b_R+1_1ss19CT	CCGCGTTCCACAGCTTTCTTGAATTTT
mtr-U6	CGCACAAATCGAGAAATGGTCC
